# Supplementary material for: Single nucleotide polymorphism discovery in bovine liver using RNA-seq technology
Source: PLoS One. 2017 Feb 24;12(2):e0172687. doi: 10.1371/journal.pone.0172687 (PMC5325534; doi:10.1371/journal.pone.0172687)
Supplement: S19 Table — (XLSX) [file pone.0172687.s019.xlsx]

## Sheet: 1.PR
S19 Table: SNPs filtering data set of Polish Red breed.
SNP locus	REF	CP 19	CP 20	CP 21	CP 22	CP 23	CP 24	SNP% CP19	SNP% CP20	SNP% CP21	SNP% CP22	SNP% CP23	SNP% CP24	READS CP19	READS CP20	READS CP21	READS CP22	READS CP23	READS CP24	SNP% CP27	SNP% CP28	SNP% CP29	SNP% CP30	SNP% CP31	SNP% CP32	SNP% CP35	SNP% CP36	SNP% CP37	SNP% CP38	SNP% CP39	SNP% CP40
60196336	C	T	T	T	T	T	T	1	1	1	1	1	1	17	8	31	49	8	26	0	0	0	0	0	0	0	0	0	0	0	0
60196353	A	G	G	G	G	G,T	G	1	1	1	1	1	1	21	10	40	56	7	24	0	0	0	0	0	0	0	0	0	0	0	0
19434984	C	T	T	T	T	T	T	1	1	1	1	1	1	11	19	3	37	27	15	0	0	0	0	0	0	0	0	0	0	0	0
5866918	G	A	A	A	A	A	A	1	1	1	1	1	1	2	3	3	2	3	26	0	0	0	0	0	0	0	0	0	0	0	0
52395354	T	C	C	C	C	C	C	1	1	1	1	1	1	7	4	2	13	4	6	0	0	0	0	0	0	0	0	0	0	0	0
240781	G	C	C	C	C	C	C	1	1	1	1	1	1	20	4	1	8	7	4	0	0	0	0	0	0	0	0	0	0	0	0
49860934	T	C	C,A	C	C	C	C	1	1	1	1	1	1	2	2	5	11	2	13	0	0	0	0	0	0	0	0	0	0	0	0
92435822	G	T	T	T	T	T	T	1	1	1	1	1	1	5	11	6	4	3	6	0	0	0	0	0	0	0	0	0	0	0	0
20033040	A	G	G	G	G	G	G	0.857143	1	1	1	1	1	7	4	2	2	2	3	0	0	0	0	0	0	0	0	0	0	0	0
6077150	A	C	C	C	C	C	C	1	1	1	1	1	0.8	2	7	2	9	4	5	0	0	0	0	0	0	0	0	0	0	0	0
35450472	A	G	G	G	G	G	G	1	1	1	1	1	0.75	4	2	4	7	3	4	0	0	0	0	0	0	0	0	0	0	0	0
1075110	C	T	T	T	T	T	T	1	1	1	1	0.75	1	8	2	2	9	4	2	0	0	0	0	0	0	0	0	0	0	0	0
9416973	T	G	G	G	G	G	G	1	1	1	1	1	1	8	4	6	3	4	6	0	0	0	0	0	0	0.285714	0	0	0	0	0
25667396	A	G	G	G,T	G	G	G	1	1	1	1	1	0.571429	2	3	2	2	6	7	0	0	0	0	0	0	0	0	0	0	0	0
9620768	A	G	G	G	G	G	G	1	1	1	1	1	0.545455	10	6	4	28	12	11	0	0	0	0	0	0	0	0	0	0	0	0
62305892	T	G	G	G	G	G	G	0.555556	1	0.875	1	1	1	9	3	8	2	4	3	0	0	0	0	0	0	0	0	0	0	0	0
32637188	C	T	T	T	T	T	T	1	1	1	1	1	1	2	7	6	13	3	13	0	0	0	0	0	0	0	0.25	0.375	0	0	0
23497153	G	A	A	A	A	A	A	0.354839	1	1	1	1	1	31	12	2	5	2	11	0	0	0	0	0	0	0	0	0	0	0	0
69514966	C	T	T	T	T	T	T	1	1	0.333333	1	1	0.952381	7	6	12	4	7	21	0	0	0	0	0	0	0	0	0	0	0	0
62288404	C	A	A	A	A	A	A	1	1	1	1	1	1	3	4	3	3	6	4	0	0	0	0	0	0	0	0	0	0	0	0.75
24971485	G	C	C	C	C	C	C	0.590909	1	1	1	1	1	22	2	6	6	5	6	0	0	0	0	0	0.4	0	0	0	0	0	0
32765070	G	A	A	A	A	A	A	1	1	1	1	1	1	17	3	7	21	6	6	0	0	0	0	0	0	0	0.833333	0	0	0	0
24970466	C	G	G	G	G	G	G	0.727273	1	1	1	1	1	11	11	3	16	10	11	0	0	0	0	0	0	0	0	0	0	0.615385	0
83463296	C	G	G	G	G	G	G	1	1	1	1	1	1	9	5	4	12	2	3	0	0	0	0	0	0	0	0	0	0	0.9	0
26157888	C	G	G	G	G	G	G	1	1	1	1	1	1	6	2	12	9	5	12	0	0	0	0	0	1	0	0	0	0	0	0
45453520	T	C	C	C	C	C	C	1	1	1	1	1	1	3	2	3	8	2	1	0	0	0	1	0	0	0	0	0	0	0	0
45453556	T	C	C	C	C	C	C	1	1	1	1	1	1	3	2	5	8	2	1	0	0	0	1	0	0	0	0	0	0	0	0
87344787	A	T,C	T	T	T	T	T	1	1	1	1	1	1	34	19	7	51	34	23	0	0	0	1	0	0	0	0	0	0	0	0
2792375	C	T	T	T	T	T	T	1	1	1	1	1	1	2	2	4	3	2	4	0	0	1	0	0	0	0	0	0	0	0	0
87064478	C	T	T	T	T	T	T	1	1	1	1	1	1	35	11	2	28	21	15	1	0	0	0	0	0	0	0	0	0	0	0
38979346	A	G,T	G	G	G	G	G	1	1	1	1	1	1	7	2	4	4	2	3	0	0	0	1	0	0	0	0	0	0	0	0
5571342	T	A	A	A	A	A	A	1	1	1	1	1	1	7	2	3	8	4	12	0	0	1	0	0	0	0	0	0	0	0	0
35204599	G	A	A	A	A	A	A	1	1	1	1	1	1	3	2	4	2	5	12	0	0	1	0	0	0	0	0	0	0	0	0
43860175	G	C	C	C	C	C	C	1	1	1	1	1	1	2	5	5	3	2	2	0	0	0	0	0	1	0	0	0	0	0	0
10430699	A	C	C	C	C	C	C	1	1	1	1	1	1	3	4	6	5	2	3	0	0	0	0	1	0	0	0	0	0	0	0
11085293	C	T	T	T	T	T	T	1	1	1	1	1	1	13	14	6	11	2	6	0	0	1	0	0	0	0	0	0	0	0	0
6101381	A	G	G	G	G	G	G	1	1	1	1	1	1	20	10	4	2	10	16	0	0	1	0	0	0	0	0	0	0	0	0
10114005	C	T	T	T	T	T	T	1	1	1	1	1	1	7	7	6	3	5	8	0	0	1	0	0	0	0	0	0	0	0	0
101019977	G	A	A	A	A	A	A	1	1	1	1	1	1	4	12	4	5	7	21	0	0	0	0	1	0	0	0	0	0	0	0
38269535	G	A	A	A	A	A	A	1	1	1	1	1	1	7	10	6	9	5	12	0	0	1	0	0	0	0	0	0	0	0	0
100091359	T	C	C	C	C	C	C	1	1	1	1	1	1	10	2	2	7	7	6	0	0	0	1	0	0	0	0	0	0	0	0
100091369	G	A	A	A	A	A	A	1	1	1	1	1	1	10	2	3	4	7	6	0	0	0	1	0	0	0	0	0	0	0	0
104675283	T	G	G	G	G	G	G	1	1	1	1	1	1	28	4	2	4	5	2	0	0	0	0	1	0	0	0	0	0	0	0
109721625	G	C	C	C	C	C	C	1	1	1	1	1	1	5	2	2	2	4	2	0	0	0	1	0	0	0	0	0	0	0	0
1792819	T	C	C	C	C	C	C	1	1	1	1	1	1	3	2	5	9	4	9	0	0	0	0	1	0	0	0	0	0	0	0
6013493	T	C	C	C	C	C	C	1	1	1	1	1	1	2	4	2	12	2	4	0	0	0	0	0	0	0	1	0	0	0	0
36903676	T	C	C	C	C	C	C	1	1	1	1	1	1	11	14	4	3	18	13	0	0	0	0	0	0	0	0	0	0	1	0
25966080	T	C	C	C	C	C	C	1	1	1	1	1	1	6	2	3	11	3	2	0	0	0	0	0	0	0	0	0	1	0	0
89835284	C	A	A	A	A	A	A	1	1	1	1	1	1	6	2	3	5	2	7	0	0	0	0	0	0	0	0	0	1	0	0
46482878	C	A	A	A	A	A	A	1	1	1	1	1	1	3	4	14	10	3	3	0	0	0	0	0	0	0	0	0	1	0	0
60195938	G	A	A	A	A	A	A	1	1	1	1	1	1	31	28	14	24	18	23	0	0	0	0	0	0	1	0	0	0	0	0
60196998	C	T	T	T	T	T	T	1	1	1	1	1	1	23	30	19	23	7	37	0	0	0	0	0	0	1	0	0	0	0	0
30403627	C	T	T	T	T	T	T	0.666667	1	1	1	1	0.333333	6	4	2	2	2	6	0	0	0	0	0	0	0	0	0	0	0	0
36981326	A	G	G	G	G	G	G	1	0.5	1	0.5	1	1	9	12	3	4	11	3	0	0	0	0	0	0	0	0	0	0	0	0
60636928	C	A	A	A	A	A	A	1	1	1	1	1	1	3	1	2	6	3	8	0	0	0	0	0	0	0	0	0	0	0	1
4416214	A	G	G	G	G	G	G	1	1	1	1	1	1	2	3	6	5	2	10	0	0	0	0	0	0	0	0	0	0	0	1
53880500	T	C	C	C	C	C	C	1	1	1	1	1	1	15	17	14	9	3	8	0	0	0	0	0	0	0	0	0	0	0	1
6135743	A	T	T	T	T	T	T	1	1	1	1	1	1	4	6	35	28	9	32	0	0	0	0	0	0	0	0	0	0	0	1
46755318	A	G	G	G	G	G	G	1	1	1	1	1	1	11	16	7	21	4	19	0	0	0	0	0	0	0	0	0	0	0	1
46755319	A	G	G	G	G	G	G	1	1	1	1	1	1	11	16	5	21	4	19	0	0	0	0	0	0	0	0	0	0	0	1
27715467	C	G	G	G	G,T	G	G	1	1	1	1	1	1	4	4	7	14	8	10	0	0	0	0	0	0	0	0	0	0	0	1
29091271	G	C	C	C	C	C	C	1	1	1	1	1	1	6	2	3	5	2	3	0	0	0	0	0	0	0	0	0	0	0	1
43337435	C	T	T	T,A	T	T	T	1	1	1	1	1	1	15	4	14	5	3	5	0	0	0	0	0	0	0	0	0	0	0	1
16484341	C	T	T	T	T	T	T	1	1	1	1	0.6	1	4	5	3	7	10	3	0	0	0	0	0	0	0	0	0	0	0	0.6
32592646	C	G	G	G	G	G	G	1	0.666667	1	1	1	0.272727	2	3	4	6	3	11	0	0	0	0	0	0	0	0	0	0	0	0
62653243	T	C	C	C	C	C	C	1	0.928571	1	1	1	1	10	14	4	12	7	12	0	0	0	0	1	0	0	0	0	0	0	0
60197150	T	A	A	A	A	A	A	1	1	1	0.92	1	1	35	22	21	50	5	26	0	0	0	0	0	0	1	0	0	0	0	0
70768377	A	C	C	C	C	C	C	0.888889	1	1	1	1	1	9	5	11	5	6	13	0	0	0	0	0	0	0	0	0	0	0	1
78828422	C	G	G	G	G	G	G	1	1	1	1	1	0.833333	8	3	3	10	5	6	0	0	0	0	0	0	1	0	0	0	0	0
89837152	G	T	T	T	T	T	T	1	0.5	1	1	1	0.333333	5	4	6	8	5	9	0	0	0	0	0	0	0	0	0	0	0	0
89837155	A	T	T	T	T	T	T	1	0.5	1	1	1	0.333333	5	4	5	8	6	9	0	0	0	0	0	0	0	0	0	0	0	0
4416220	T	C	C	C,A	C	C	C	1	1	0.833333	1	1	1	2	3	6	4	2	10	0	0	0	0	0	0	0	0	0	0	0	1
60195652	A	T	T	T	T	T	T	1	1	1	1	1	1	32	14	31	61	18	16	0	0	0	0	0	0.181818	1	0	0	0	0	0
285312	T	C	C	C	C	C	C	1	1	1	0.818182	1	1	2	12	5	11	3	4	0	0	0	0	0	0	0	0	0	1	0	0
4365842	T	C	C	C	C	C	C	0.445652	0.330275	1	1	0.987179	1	184	109	64	85	78	36	0	0	0	0	0	0	0	0	0	0	0	0
8490181	C	T	T	T	T	T	T	1	1	1	1	0.428571	1	6	4	5	11	7	15	0	0	0	0	0	0	0	0	0	0	0	0.666667
76883613	C	T	T	T	T	T	T	1	0.75	1	1	1	1	7	8	6	3	7	4	0	0	0	0	0	0	0	0	0	0	1	0
27079248	A	G	G	G	G	G	G	1	1	1	1	1	1	5	3	2	12	4	3	0	0	0	0	1	0	0	0	0	0	0	0.269231
5866387	A	G	G	G	G,T	G	G	0.6	1	1	1	1	1	5	7	7	14	12	47	0	0	0.666667	0	0	0	0	0.222222	0	0	0	0
16557746	T	C	C	C	C	C,A	C	0.888889	0.6	1	1	1	1	9	5	12	5	5	12	0	0	0.285714	0.5	0	0	0	0	0	0	0	0
90766493	G	A	A	A	A	A	CATATATATATATATATATA	1	0.666667	1	0.984127	0.4	1	19	6	28	63	65	1	0	0	0.35	0	0	0	0	0	0	0	0	0
56817812	G	A	A	A	A	A	A	1	1	0.857143	1	1	1	10	8	7	12	11	8	0	0.357143	0	0	0	0	0	0	0	0	0	0.8
48870574	G	A	A,C	A	A	A	A	1	1	0.5	0.625	1	1	10	10	4	8	5	3	0	0	0	0	0	0.428571	0	0	0	0	0	0
71462365	G	A	A	A	A	A	A	1	1	1	1	1	1	9	8	2	7	1	4	0	0	1	0.307692	0	0	0	0	0	0	0	0
39273235	A	G	G	G,T	G	G	G	0.625	1	1	1	1	1	8	4	10	15	4	20	0	0	0	0.444444	0	0	0	0	0	0	0.5	0
39273213	C	G	G	G	G	G	G	0.833333	1	1	1	1	1	6	5	7	11	6	13	0	0	0.222222	0.444444	0	0	0	0	0	0	0.5	0
5847262	T	A	A	A,C	A	A	A	1	1	1	1	1	1	2	2	10	14	2	25	0	0	0.5	0.857143	0	0	0	0	0	0	0	0
82544863	A	G	G	G	G	G	G	0.592593	1	1	1	1	1	27	11	2	14	24	18	0	0	0	0	0	1	0	0	0	0	0	0
53670144	C	T	T	T	T	T	T	1	0.571429	1	1	1	1	4	14	4	6	2	2	0	0	0	1	0	0	0	0	0	0	0	0
103890067	A	C	C	C	C	C	C	0.571429	1	1	1	1	1	14	8	6	10	7	4	0	1	0	0	0	0	0	0	0	0	0	0
82544827	T	C	C	C	C	C	C	0.56	1	1	1	1	1	25	14	2	11	21	12	0	0	0	0	0	1	0	0	0	0	0	0
4810815	T	C	C	A	A,C	A	A	1	1	1	1	1	1	2	3	2	11	2	12	0	0	1	0	0.454545	0	0	0	0	0	0	0
82544839	T	C	C	C	C	C	C	0.538462	1	1	1	1	1	26	14	1	14	22	14	0	0	0	0	0	1	0	0	0	0	0	0
62263631	T	C	C	C,A	C	C	C	1	1	1	1	1	1	2	9	14	13	2	4	0	0	0	1	0	0	0	0	0	0	0.5	0
37555427	T	C	C	C	C	C	C	1	1	1	1	1	0.5	18	11	5	18	10	6	0	0	0	0	1	0	0	0	0	0	0	0
9832929	G	A	A	A	A	A	A	1	1	1	1	1	0.466667	10	4	4	5	11	15	0	1	0	0	0	0	0	0	0	0	0	0
4994771	G	T	T	T	T	T	T	1	1	1	1	1	0.454545	17	3	2	10	5	11	0	0	1	0	0	0	0	0	0	0	0	0
53670209	T	C	C	C	C	C	C	1	0.454545	1	1	1	1	2	11	5	3	2	2	0	0	0	0	1	0	0	0	0	0	0	0
61242699	A	C	C	C	C	C	C	1	1	1	1	1	1	8	2	7	5	6	8	0	0	0.555556	0	0	1	0	0	0	0	0	0
31322952	C	T	T	T	T	T	T	1	0.692308	0.714286	0.823529	0.714286	0.5	14	13	7	17	7	10	0	0	0	0	0	0	0	0	0	0	0	0
32446055	G	A	A	A,T	A	A	A	1	1	1	1	1	1	4	3	6	21	3	21	0	0	1	0	0	0	0	0.571429	0	0	0	0
54882401	C	A	A	A	A	A	A	1	0.428571	1	1	1	1	7	7	5	5	3	2	0	0	0	0	1	0	0	0	0	0	0	0
61476338	T	A	A	A	A	A	A	1	1	0.666667	1	1	0.75	9	2	3	7	3	4	0	0	0	0	0	1	0	0	0	0	0	0
57004084	T	C	C	C	C	C	C	0.722222	1	0.8	0.818182	0.818182	0.882353	18	10	5	22	11	17	0	0	0.625	0	0	0	0	0	0	0	0	0
82299187	C	T	T	T	T	T	T	0.75	0.833333	0.733333	0.8	0.794118	0.5	36	18	15	25	34	10	0	0	0	0	0	0	0	0	0	0	0	0
47844426	G	T	T	T	T	T	T	0.703704	1	1	1	0.7	1	27	3	4	6	10	24	0	0	0.5	0.5	0	0	0	0	0	0	0	0
5848501	T	A	A	A	A	A	A	1	1	1	1	1	1	2	11	20	23	6	85	0	0	0	0.6	1	0	0	0	0	0	0	0
67954983	T	C	C	C	C	C	C	0.923077	0.971429	1	0.954545	1	0.8	13	35	4	22	6	10	0	0	0	0.4	0	0	0	0.375	0	0	0.307692	0.166667
25828973	A	G	G	G,T	G	G	G	1	1	1	1	0.5	0.888889	32	27	8	10	10	9	0	0	0	0	1	0	0	0	0	0	0	0
29032201	G	T	T	T	T	T	T	1	1	1	1	1	1	2	4	2	7	8	2	0	0	0	0	0	0	1	0	0.615385	0	0	0
4994767	T	G	G	G	G	G	G	1	1	1	1	1	0.363636	17	5	2	10	5	11	0	0	1	0	0	0	0	0	0	0	0	0
38712852	C	G	G	G	G	G	G	0.571429	1	1	1	0.7	0.9	7	7	4	13	10	10	0	0	0.833333	0	0	0	0	0	0	0	0	0
72937238	C	G	G	G	G	G	G	1	1	1	1	1	1	8	2	4	2	8	24	0.666667	0	1	0	0	0	0	0	0	0	0	0
241235	T	C	C	C	C	C	C	1	1	1	1	1	1	22	9	5	3	12	11	0	1	0	0.666667	0	0	0	0	0	0	0	0
62427322	G	A	A	A	A	A	A	0.333333	1	1	1	1	1	9	8	2	3	2	5	0	0	0	0	0	0	0	0	0	0	1	0
99917775	T	C	C	C	C	C,A	C	1	1	1	1	1	0.913043	8	2	11	22	10	23	0	0	0	0	1	0	0	0	0	0	0.6	0
82298891	T	C	C	C	C	C	C	0.736842	0.416667	0.666667	0.714286	0.777778	1	19	24	9	14	18	3	0	0	0	0	0	0	0	0	0	0	0	0
78444207	T	C	C	C	C	C	C	0.6875	1	1	1	0.857143	0.5	16	17	4	13	7	6	0	0	0	0	0.4	0	0	0	0	0.333333	0	0
39273074	A	C	C	C	C	C	C	0.5	1	1	1	1	0.909091	6	4	3	10	3	11	0	0	0	0.5	0	0	0	0	0	0	0	0.6
19576425	G	A	A	A	A	A	A	1	0.8	1	1	1	1	11	10	18	9	2	2	0	0	0	0	0	0	0	0	0	0	1	0.5
71460694	G	A	A	A,C	A	A	A	0.888889	1	1	1	1	1	9	8	3	12	5	8	0	0	0.875	0.222222	0.5	0	0	0	0	0	0	0
32418687	T	C	C	C	C	C	C	1	1	1	1	1	0.769231	2	5	2	6	15	13	0	0	0	0	0	0	0	0	0	1	0	0.5
79810846	G	A	A	A	A	A	A	1	0.25	1	1	1	1	3	8	2	11	5	4	0	0	0	0	0	0	0	0	0	0	0	1
9135680	G	A	A	A	A	A	A	0.555556	0.272727	1	1	1	1	9	11	9	4	4	2	0	0	0	0	0	0	0	0	0	0.25	0.333333	0
28503774	A	C	C	C	C	C	C	0.5	1	0.882353	0.915254	0.989362	0.953846	6	4	51	59	94	65	0	0	0	1	0	0	0	0	0	0	0	0
5852755	T	C	C	C	C	C	C	0.6	1	0.925	0.848485	0.916667	1	10	6	40	33	12	39	0	0	0.363636	0.147059	0.2	0.347826	0	0	0	0	0	0
47844434	T	C	C	C,A	C	C	C	0.714286	1	1	1	0.7	1	28	2	4	6	10	21	0	0	0.5	0.375	0	0.333333	0	0	0	0	0	0
73780777	A	G	G	G	G	G	G	0.857143	1	1	1	1	0.571429	7	4	2	3	10	7	0	0.625	0	0	0	0	0	0	0.4	0.222222	0	0
82542006	T	C	C	C	C	C	C	0.555556	1	1	1	0.62069	1	18	8	13	22	29	22	0	0	0	0	0	1	0	0	0	0	0	0
19266747	A	C	C	C	C	C	C	1	1	0.666667	1	1	1	2	2	3	5	1	5	0	0	0	0	0	0	0	0	1	0	0	0.5
22097609	C	T	T	T	T	T	T	0.466667	0.526316	1	1	1	0.568182	90	38	28	50	61	44	0	0.4	0	0	0	0	0	0	0	0	0	0
10148814	C	T	T	T	T	T	T	1	1	1	1	1	0.538462	17	28	8	19	2	13	1	0	0	0	0	0.384615	0	0	0	0	0	0
72936925	C	T	T	T	T	T	T	1	1	1	1	1	1	9	10	2	4	8	6	0.857143	0	0	0	0	0	0	1	0	0	0	0
82299266	C	T	T	T	T	T	T	0.55	0.933333	0.76	0.75	0.617647	0.5	40	15	25	20	34	12	0	0	0	0	0	0	0	0	0	0	0	0
35723535	G	C	C	C	C	C	C	0.423077	1	1	1	1	1	26	2	12	5	10	6	0	0.6	0	0	0	0	0	0	0	0	0.538462	0.181818
76250252	T	C	C	C	C	C	C	0.5	1	1	1	0.8	0.8	4	4	5	4	5	5	0	0	1	0	0	0	0	0	0	0	0	0
27430169	A	G	G	G	G	G	G	1	1	1	0.6	1	1	9	4	5	10	3	4	0	0	0	0.5	0	0	0	0	0	0	0	1
21010747	C	A	A	A	A	A	A	0.8	1	0.363636	0.684211	1	1	5	11	22	19	2	2	0.347826	0	0	0.416667	0	0	0	0	0	0	0	0
82296890	T	C	C	C	C	C	C	0.583333	0.8	0.6	1	0.5	0.6	12	5	5	6	20	5	0	0	0	0	0	0	0	0	0	0	0	0
82541965	A	G	G	G	G	G	G	0.5	1	1	1	0.571429	1	10	7	9	19	21	16	0	0	0	0	0	1	0	0	0	0	0	0
58011074	A	G	G	G	G	G	G	0.333333	1	1	1	0.666667	0.571429	6	7	2	6	3	7	0	0	0	0	0	0.5	0	0	0	0	0	0
78655990	G	A	A	A	A	A	A	1	1	0.4	0.666667	1	0.666667	4	2	5	6	2	3	0	0	0	0.666667	0	0	0	0	0	0	0	0
49838593	C	T	T	T,A	T	T,A	T	1	1	1	1	1	1	31	5	11	7	12	5	0	1	0.363636	0	0.571429	0	0	0	0	0	0	0
23319820	C	T	T	T	T	T	T	1	0.571429	0.888889	1	1	1	5	7	9	8	6	3	0	0.4	0	1	0	0	0	0	0	0	0	0
16758839	G	A	A	A	A	A	A	0.61194	0.255319	1	0.987805	0.588235	0.595745	67	47	67	82	34	47	0	0	0	0	0	0	0	0	0	0	0	0
31739764	A	C	C	C	C	C	C	1	1	0.8	0.733333	1	0.5	33	6	5	15	11	8	0	0	0	0	0	0	0	0	1	0	0	0
16229519	T	A	C	A	A	A	A	1	0.6	1	1	1	1	7	5	2	4	4	2	0	0	0	1	0.571429	0	0	0	0	0	0	0
4767814	T	C	C	C	C	C	C	1	0.733333	1	1	1	1	18	15	4	12	7	3	0	0	0	0	0	0	0	0	0	0	0.833333	0.894737
55906578	T	C	C	C	C	C	C	1	1	1	1	1	1	4	11	7	5	7	3	0	0	0	1	0	1	0	0	0	0	0	0
43796100	A	G	G	G	G	G	G	1	1	1	1	1	1	5	4	9	19	10	21	1	1	0	0	0	0	0	0	0	0	0	0
9814076	C	T	T	T	T	T	T	1	1	1	1	1	1	5	7	12	12	5	6	0	1	0	0	0	1	0	0	0	0	0	0
48871119	T	C	C	C	C	C	C	1	1	1	1	1	1	10	10	4	9	8	9	0	1	0	0	0	1	0	0	0	0	0	0
122938634	N	C	C	C	C,A	C	C	1	1	1	1	1	1	3	9	4	20	5	14	0	0	1	1	0	0	0	0	0	0	0	0
1747986	C	T	T	T	T	T	T	1	1	1	1	1	1	10	11	9	14	4	9	0	0	0	1	1	0	0	0	0	0	0	0
4236410	C	G	G	G	G	G	G	1	1	1	1	1	1	2	11	3	17	4	4	0	0	1	0	1	0	0	0	0	0	0	0
60604929	T	C	C	C	C	C	C	1	1	1	1	1	1	2	6	2	2	3	2	1	0	1	0	0	0	0	0	0	0	0	0
60604938	T	C	C	C	C	C	C	1	1	1	1	1	1	3	6	2	2	3	2	1	0	1	0	0	0	0	0	0	0	0	0
110726377	A	G	G	G	G	G	G	1	1	1	1	1	1	2	2	5	13	2	4	0	1	0	0	0	1	0	0	0	0	0	0
71052919	A	G	G	G	G	G	G	1	1	1	1	1	1	20	8	6	35	13	32	0	0	1	1	0	0	0	0	0	0	0	0
18936428	A	G	G	G	G	G	G	1	1	1	1	1	1	9	5	3	12	2	2	0	0	0	1	1	0	0	0	0	0	0	0
54665859	A	G	G	G	G	G	G,T	1	1	1	1	1	1	3	6	5	2	3	3	0	0	1	1	0	0	0	0	0	0	0	0
18402106	A	G	G	G	G	G	G	0.833333	1	1	1	1	0.666667	6	13	3	15	5	6	1	0	0	0.5	0	0	0	0	0	0	0	0
40639372	C	T	T	T	T	T,A	T	0.666667	0.8	1	1	1	1	3	5	8	13	10	2	0	0	0.666667	0.5	0.3	0	0	0	0	0	0	0
1466953	T	G	G	G	G	G	G	1	1	1	1	1	1	9	5	3	4	4	3	0	1	0	0	0	0	0	0	0	1	0	0
6112151	T	C	C	C	C	C	C	1	1	1	1	1	1	3	6	15	27	16	44	0	0	0	0	0	1	0	1	0	0	0	0
48869563	C	G	G	G,A	G,A	A	G	1	1	1	1	1	1	6	3	13	5	7	5	0	0	0	0	1	0	0	0	1	0	0	0
1566633	T	C	C	C	C	C	C	1	1	1	1	1	1	8	2	4	12	2	3	0	0	1	0	0	0	0	1	0	0	0	0
35973538	T	A	A	A	A	A	A	1	1	1	1	1	1	5	7	11	10	3	2	0	0	0	0	1	0	0	0	0	0	1	0
32450833	N	T	T	T	T	T	T	1	1	1	1	1	1	35	41	224	20	28	20	0	1	0	0	0	0	0	0	0	0	1	0
43260130	T	C	C	C	C	C	C	1	1	1	1	1	1	4	6	2	6	2	4	0	0	1	0	0	0	1	0	0	0	0	0
31739788	A	G	G	G	G	G	G	1	1	1	1	1	1	26	8	3	6	8	6	0	0	1	0	0	0	0	0	1	0	0	0
22816827	G	A	A	A	A	A	A	1	1	1	1	1	1	6	3	2	3	4	3	0	0	0	1	0	0	0	0	1	0	0	0
109721673	T	C	C	C	C	C	C	1	1	1	1	1	1	8	4	2	2	4	2	0	0	0	1	0	0	0	0	0	1	0	0
61476373	C	T	T	T	T	T	T	1	1	1	1	1	1	7	3	5	9	4	5	0	0	0	0	0	1	1	0	0	0	0	0
29578553	A	G	G	G	G	G	G	1	1	1	1	1	1	8	7	3	5	6	11	0	0	0	1	0	0	0	0	0	0	0	1
6143402	A	G	G	G	G	G	G	1	1	1	1	1	1	2	6	6	11	14	8	0	0	0	0	1	0	0	0	0	0	0	1
72629181	T	G	G	G	G	G	G	1	1	1	1	1	1	2	3	3	6	5	2	1	0	0	0	0	0	0	0	0	0	0	1
14944414	T	G	G	G	G	G	G	1	1	1	1	1	1	4	5	2	2	2	4	0	0	1	0	0	0	0	0	0	0	0	1
61242838	T	C	C	C	C	C	C	1	1	1	1	1	1	5	2	5	6	10	2	0	0	0	0	0	1	0	0	0	0	0	1
98881412	A	G	G	G	G	G	G	1	1	1	1	1	1	4	3	4	3	3	2	0	1	0	0	0	0	0	0	0	0	0	1
74083119	C	T	T	T	T	T	T	1	1	1	1	1	1	7	4	3	4	2	3	0	0	0	0	0	0	0	0	1	0	1	0
6013473	A	G	G	G	G	G	G	1	1	1	1	1	1	2	4	2	9	2	4	0	0	0	0	0	0	0	1	0	1	0	0
8486940	A	T	T	T	T	T	T	1	1	1	1	1	1	7	7	4	8	4	4	0	0	0	0	0	0	1	0	1	0	0	0
89551080	A	G	G	G	G	G	G	1	1	1	1	1	1	3	2	3	8	2	2	0	0	0	0	0	0	1	0	0	1	0	0
73823306	A	G	G	G	G	G	G	1	1	1	1	1	1	4	4	4	5	7	4	0	0	0	0	0	0	0	1	0	0	0	1
6144530	T	G	G	G	G	G	G	1	1	1	1	1	1	3	2	7	11	2	12	0	0	0	0	0	0	0	0	1	0	0	1
929237	C	G	G	G	G	G	G	1	1	1	1	1	1	4	2	1	5	2	6	0	0	0	0	0	0	0	0	1	0	0	1
29137964	G	C	C	C	C	C	C	1	1	1	1	1	1	2	6	5	2	6	4	0	0	0	0	0	0	0	0	0	0	1	1
93791112	T	C	C	C	C	C	C	1	1	1	1	1	1	6	8	3	3	2	6	0	0	0	0	0	0	1	0	0	0	0	1
7214251	C	T	T	T	T	T	T	1	1	1	1	1	1	4	6	7	9	3	2	0	0	0	0	0	0	0	0	0	0	1	1
111200973	A	C	C	C	C	C	C	1	1	1	1	1	1	4	11	7	4	4	6	0	0	0	0	0	0	0	0	0	1	0	1
13211941	T	C	C	C	C	C	C	1	1	1	1	1	1	5	4	5	12	11	3	0	0	0	0	0	0	1	0	0	0	0	1
56841584	A	G	G	G	G	G	G	1	1	0.998131	0.994253	1	1	1062	629	535	870	563	754	0	1	0	0	0	0	1	0	0	0	0	0
83459824	A	T	T	T	T	T	T	1	1	1	0.987952	1	1	23	25	30	83	10	2	1	0	0	0	0	0	0	0	1	0	0	0
33607595	C	T	T	T,A	T	T	T	1	1	1	0.942857	1	0.541667	3	8	14	35	2	24	0	0	0	0	0	0	0	0	1	0	0.5	0
49396341	C	T	T	T	T	T	T	0.333333	1	1	1	1	0.8	12	3	5	7	4	5	0	0	0	0	0	0	0	0.4	0.75	0	0	0
10148232	C	A	A	A	A	A	A	1	1	1	1	1	0.789474	9	25	32	28	6	19	0	0	0.571429	0	0	0.571429	0	0	0	0.666667	0	0
24794001	A	G	G	G	G	G	G	1	1	1	1	1	1	26	19	16	12	18	30	0	0.416667	0.238095	0	0.833333	0.533333	0	0	0	0	0	0
5919761	C	G,T	G	G	G	G	G	1	1	1	1	0.909091	0.966387	5	36	2	1	33	119	0	0	1	0	0	0	0.5	0	0	0	0	0.4
131754525	C	T	T	T	T	T	T	1	0.4	1	1	1	0.666667	3	10	9	9	2	3	0	0	0	0	0	0	0.5	0	0	0.6	0	0
73987678	A	G	G	G	G	G	G	1	1	0.493333	0.58209	0.436364	0.448276	147	54	75	67	110	87	0	0	0	0	0	0	0	0	0	0	0	0
66789571	G	T	T	T	T	T	T	1	1	1	0.958333	0.428571	0.5	28	11	12	24	7	10	0	0	0	0.444444	0	0.266667	0	0	0	0	0	0.222222
71459090	T	C	C	C	C	C	C	1	1	1	1	1	1	42	32	6	16	3	10	0.555556	0	1	0.25	0.25	0	0	0	0	0	0	0
33607601	G	A	A	A	A	A	A	1	1	1	0.942857	1	0.5	3	8	14	35	2	22	0	0	0	0	0	0	0	0	1	0	0.5	0
28918602	T	G	G	G	G	G	G	1	1	0.5	0.714286	1	0.722222	6	3	8	14	9	18	0	0	0	0	0	0	0	0	0	0	0	1
13160629	C	G	G	G	G	G	G	1	0.4	0.8	0.625	1	1	6	10	5	8	5	9	0	0	0	0	0	0.666667	0	0	0	0	0	0.222222
6088538	G	T	T	T	T	T	T	1	1	1	0.923077	1	1	11	15	9	26	11	22	0	0	1	0	0	0	0	1	0	0	0	0
5852797	G	C	C	C	C	C	C	0.6	1	0.870968	0.897436	1	1	10	15	31	39	11	33	0	0	0.35	0.183673	0.259259	0.325	0	0.333333	0	0	0	0
8937564	A	C	C	C	C	C	C	1	1	1	1	0.75	1	2	6	8	11	4	14	0	0	0	0	0.333333	0	1	0.5	0	0	0	0
53307400	A	G	G	G	G	G	G	1	1	0.833333	1	1	1	5	3	6	1	2	1	0.666667	0.75	0.5	0	0	0	0	0	0	0	0	0
589398	A	C	C	C	C	C	C	1	1	1	1	1	0.909091	14	4	5	9	6	11	1	0	0	0	0	0	0	0	0	0	1	0
56841129	A	C	C	C	C	C	C	0.988426	0.993453	0.962963	0.975822	0.988077	0.985	1296	1222	432	1034	671	600	0	0.995902	0	0	0	0	0.990446	0	0	0	0	0
73930571	A	G	G	G	G	G	G	1	1	1	1	1	1	2	3	3	8	3	11	0	0	0	0.6	1	0	0	0	0	0	0	0.5
108993838	G	A	A	A	A	A	A	1	0.9	1	1	1	1	2	10	2	4	5	4	0	0	1	0	0	0	0	0	0	0	1	0
82542034	A	G	G	G	G	G	G	0.583333	1	1	1	0.565217	1	12	8	15	19	23	15	0	0	0	0.25	0	1	0	0	0	0	0	0
107920602	G	A	A	A	A	A	A	0.5625	0.714286	1	1	0.371429	0.25	16	35	2	17	35	28	0	0	0	0	0	0	0	0	0	0	0	0
5852804	G	A	A	A	A	A	A	0.545455	1	0.9	0.871795	1	1	11	13	30	39	9	33	0	0	0.304348	0.185185	0.285714	0.317073	0	0.333333	0	0	0	0
72288385	G	C	C	C	C	C	C	0.3	0.333333	1	1	1	0.875	10	9	4	7	15	16	0	0	0	0	0	0	0	0	0	0.285714	0	0.333333
7433295	G	T	T	T	T	T	T	1	1	1	0.888889	1	1	4	2	2	9	6	3	0	0	0	1	0	0	0	0	0	1	0	0
64681475	C	G	G	G	G	G	G	1	1	1	1	1	0.333333	3	2	2	8	4	6	0	0	0	1	0	0	0	0	0	0	0.444444	0
40964175	C	T	T	T,A	T	T	T	1	1	1	1	1	1	30	19	11	45	12	20	0	0	0	0.3125	0	1	0	0	0	0	0	0.8
41342754	T	C,A	C,A	C	C,A	C	C	1	1	0.972222	0.974359	0.947368	0.986111	38	26	36	78	19	72	0	0	0	0	0	0	0	1	0	0	0	1
43422713	C	T	T	T	T	T	T	1	0.625	1	1	1	1	18	8	6	18	5	2	0	1	0.333333	0	0	0	0.416667	0	0	0	0	0
9783005	C	A	A	A	A	A	A	1	0.333333	1	1	1	0.541667	6	12	5	15	7	24	0	0	0	0	0	0	0	1	0	0	0	0
19055751	T	A	A	A	A	A	A	0.5625	0.714286	0.7	0.625	1	0.545455	16	7	10	8	3	11	0.272727	0	0	0	0	0	0	0	0	0	0	0
60256442	A	G	G	G	G	G	G	1	1	1	1	0.571429	1	60	73	45	34	49	23	0	0	0	0	0	0.272727	0	0	0.571429	0.479798	0	0.37931
4823335	A	G	G	G	G	G	G	0.533333	0.4	0.214286	0.714286	1	1	15	20	14	21	8	10	0	0	0	0	0	0	0	0	0	0	0	0
15927695	T	C	C	C	C	C	C	0.478261	0.181818	0.625	0.9	0.666667	1	23	11	8	10	9	21	0	0	0	0	0	0	0	0	0	0	0	0
4919448	A	T	T	T	T	T	T	0.5	0.428571	0.421053	0.5	1	1	16	7	19	20	13	20	0	0	0	0	0	0	0	0	0	0	0	0
82298887	C	G	G	G	G	G	G	0.548387	0.384615	0.555556	0.692308	0.666667	1	31	26	9	13	18	3	0	0	0	0	0	0	0	0	0	0	0	0
71463124	C	T,A	T	T	T	T,A	T	1	1	1	1	1	1	10	9	2	8	7	4	0	0.166667	1	0	0	0	0	0	0	0.666667	0.320755	0
82542080	A	G	G	G	G	G	G	0.5	1	1	1	0.583333	1	12	6	17	29	24	18	0	0	0	0.25	0	1	0	0	0	0	0	0
68468315	T	G	G	G	G	G	G	1	1	1	1	1	1	17	10	3	7	6	3	0	0	0.714286	0	0	0	0.8	0.333333	0.333333	0	0	0
5872615	G	A	A	A	A	A	A	1	1	1	1	0.8	0.8	3	2	4	11	10	10	0	0	0	0	0	1	0	0	0.5	0.285714	0	0
90757267	G	A	A	A	A	A	A	1	0.285714	1	1	0.382353	0.441667	9	7	5	17	34	120	0	0	0.3	0	0	0	0	0	0	0	0	0
60685344	T	A	A	A	A	A	A	1	1	1	0.9	1	1	2	2	9	10	3	4	0	0	0	1	0	0	0	0	0	0.666667	0	0.428571
58002040	C	T	T	T	T	T	T	0.428571	0.571429	0.636364	0.666667	1	1	7	7	11	18	3	2	0	0	0.5	0	0	0	0	0	0	0	0	0
23248367	G	A	A	A	A	A	A	1	1	1	0.578947	0.375	0.538462	16	4	2	19	8	13	0	0.4	0.294118	0	0	0	0	0	0	0	0	0
28334041	T	A	A	A	A	A	A	0.777778	1	1	0.8	0.833333	0.285714	9	13	4	5	6	7	0	0.904762	0	0	0	0	0	0	0	0	0	0
26729737	T	C	C	C,A	C	C	C	1	1	1	0.916667	0.875	1	4	7	3	12	8	3	0	0	0	0	0	0	0	0	0	0	1	1
82299425	G	C	C	C	C	C	C	0.777778	0.941176	0.533333	0.464286	0.571429	0.5	45	17	15	28	35	16	0	0	0	0	0	0	0	0	0	0	0	0
5868304	C	T	T	T	T	T	T	0.8	1	1	1	1	1	5	4	2	12	6	13	0	0	0	0	0.8	0.222222	0	1	0	0	0	0
11049462	C	T	T	T	T	T	T	0.721519	1	1	1	0.5	0.806452	79	37	24	36	38	31	0	0.5	0	0	0	0	0	0	0	0.208333	0	0.555556
15467222	A	G	G	G	G	G	G	0.666667	1	1	0.444444	0.625	0.5	9	3	5	9	8	6	0	0	0	0.25	0	0	0	0	0	0	0.222222	0
5868383	A	G	G	G	G	G	G	0.666667	1	1	1	1	1	3	9	3	6	4	5	0	0	0.333333	0	0.571429	0	0	1	0	0	0	0
4805233	G	A	A	A	A	A	A	1	1	1	1	1	1	4	12	3	6	4	11	0.666667	0	0	0	1	0	0.571429	0	0	0	0	0
39273091	A	T	T	T	T	T	T	0.666667	1	0.666667	1	0.75	0.272727	3	4	3	2	4	11	0	0	0	0	0	0	0	0	0	0	0	0.6
78655982	A	G	G	G	G	G	G	1	1	0.222222	0.444444	1	0.75	4	1	9	9	5	4	0	0	0	0.666667	0	0	0	0	0	0	0	0
49836936	T	C	C	C	C	C	C	1	0.785714	1	1	1	0.307692	61	28	18	29	35	26	0	0.636364	0	0	0.421053	0.291667	0	0	0	0	0	0
82568563	G	A	A	A	A	A	A	0.769231	1	1	1	1	1	13	5	5	2	11	3	0.363636	0	0	0	0.666667	1	0	0	0	0	0	0
6035267	C	A	A	A	A	A	A	0.181818	1	1	1	1	0.285714	11	2	14	4	6	28	0	0	0	0	0.4	0.333333	0	0	0	0	0	0
60256481	A	G	G	G	G	G	G	1	1	0.961538	1	0.527273	1	59	58	52	31	55	22	0	0	0	0	0	0.317073	0	0	0.555556	0.486911	0	0.404762
14492721	T	G	G	G	G	G	G	1	0.555556	1	1	0.666667	1	5	9	26	16	12	7	0	0.666667	0.833333	0	0	0	0	0	0	0	0	0
102698521	C	G	G	G	G	G	G	1	0.492537	1	1	0.627907	0.511628	123	67	40	71	43	43	0	0	0	0.515152	0	0	0	0	0.395349	0	0	0
6043471	T	C	C	C	C	C	C	0.285714	1	1	1	1	1	14	9	6	18	5	33	0	0	0.6	0	0.3	0	0	0.666667	0	0	0	0
90767252	G	A	A	A	A	A	A	1	0.333333	1	1	0.313433	0.456311	16	6	22	34	67	103	0	0	0.387097	0	0	0	0	0	0	0	0	0
63613649	A	G	G	G	G	G	G	1	1	1	1	1	1	2	5	3	10	1	8	1	0	1	0.285714	0	0	0	0	0	0	0	0
36870846	G	C	C	C	C	C	C	1	1	1	1	1	1	2	2	2	6	2	2	0	1	0	0	0	0	0.285714	0	0	0	0	1
15467189	A	G	G	G	G	C	G	0.8	0.375	1	0.333333	0.454545	0.75	10	8	7	12	11	4	0	0	0	0	0	0	0	0	0	0	0	0
55718597	A	G	G	G	G	G	G	1	0.375	0.357143	0.8125	0.5	0.666667	12	8	14	16	8	3	0	0	0	0	0	0	0	0	0	0	0	0
43400508	C	T	T	T,A	T	T	T	1	1	1	1	1	0.709677	14	38	13	32	11	31	0	0	0	0	0	0	0	1	1	0	0	0
90752462	G	A,T	A	A	A	A	A	1	0.6	1	1	0.305556	0.553957	10	5	17	19	36	139	0	0	0.75	0	0	0	0	0	0	0	0	0
114419317	A	G	G	G	G	G	G	1	1	1	1	1	1	22	15	9	6	2	3	0	0	0.666667	0	0	0	0.625	1	0	0	0	0
99820899	A	G	G	G	G	G	G	0.4	1	1	1	0.666667	0.307692	5	2	2	15	3	13	0	0	0	0	0	0	0	0	0	0	0.666667	0
74011905	C	T	T	T	T	T	T	0.509934	0.981132	0.443299	0.576087	0.577465	0.611111	151	53	97	92	71	108	0	0	0	0	0	0	0	0	0	0	0	0
64760515	T	G	G	G	G	G	G	0.475	0.405405	1	1	0.349398	0.466258	80	74	62	84	83	163	0	0	0	0	0	0	0	0	0	0	0	0
27079243	A	G	G	G	G	G	G	1	1	1	1	1	1	6	2	2	11	4	3	0	0	0	0	1	0	0	0	0	0	1	0.304348
4822967	G	A	A	A	A	A	A	0.625	0.444444	0.52381	0.681818	1	1	32	18	21	22	4	15	0	0	0	0.2	0.384615	0	0	0	0	0	0	0
62689479	C	T	T	T	T	T	T	0.25	1	1	1	1	1	12	10	23	21	18	2	0	0	0	0.666667	0	0	0	0	0.5	0.4	0	0
25854862	T	C	C	C	C	C	C	0.681818	1	1	1	1	1	22	6	6	14	2	2	0	0	1	0	0	1	0	0	0	0	0	0
19004945	C	T	T	T	T	T	T	0.909091	1	0.380952	0.833333	0.888889	0.666667	11	4	21	12	9	9	0	0	1	0	0	0	0	0	0	0	0	0
82298818	C	T	T	T	T	T	T	0.483871	0.413793	0.714286	0.769231	0.583333	0.714286	31	29	7	13	12	7	0	0	0	0	0	0	0	0	0	0	0	0
47843067	C	T	T	T	T	T	T	0.833333	1	1	0.5	0.8	1	12	6	4	8	5	10	0	0	0.9	0.555556	0	0	0	0	0	0	0	0
7810844	G	A	A	A	A	A	A	1	0.8	1	1	1	0.5	5	5	3	6	2	4	0	0	0.4	0	0	0	0.4	0.4	0	0	0	0.428571
4236407	A	G	G	G	G	G,T	G	1	1	1	1	1	1	2	11	3	16	4	4	0	0	1	0	1	0	0	0	0	0.333333	0	0
92615405	G	T	T	T	T	T	T	1	0.666667	1	1	1	1	5	3	2	5	3	3	0	0	1	0	0	0	0	0	0	1	0	0
38004710	G	A	A	A	A	A	A	1	1	1	1	0.666667	1	2	8	2	5	3	3	0	0	1	0	0	0	0	0	0	0	0	1
43931433	T	C	C	C	C	C	C	1	1	0.666667	0.4	1	1	13	4	3	5	2	2	0	0	0.4	0	0	0	0	0	0	1	0	0
6043454	T	C	C	C,G	C	C	C	0.230769	1	1	1	1	1	13	9	6	14	3	25	0	0	0.75	0	0.214286	0	0	0.6	0	0	0	0
52402413	A	G	G	G	G	G	G	0.648649	0.541176	0.982759	1	1	1	74	85	58	62	69	83	0.519231	0	0.525773	0	0	0.47619	0	0	0	0	0	0
16727989	A	G	G	G	G	G	G	1	1	1	1	0.25	0.857143	39	15	9	14	16	7	0	0	0.434783	0.555556	0	0.466667	0	0	0	0	0	0
89374116	G	A	A,T	A	A	A	A	1	1	1	1	1	0.4	10	5	2	6	7	5	1	0	0	0	0	0.75	0	0	0	0	0	0
99820900	G	T	T	T	T	T	T	0.4	1	1	1	0.666667	0.25	5	1	2	12	3	12	0	0	0	0	0	0	0	0	0	0	0.666667	0
41100998	G	A	A	A	A	A	A	0.631579	0.642857	0.888889	1	0.235294	1	19	14	9	14	17	5	0	0	0	0	0	0	0	0	0.5	0	0.25	0
22097431	G	A	A	A	A	A	A	0.733333	0.545455	1	1	1	0.25641	60	33	49	45	58	39	0	0.888889	0	0	0	0	0	0	0	0	0	0
1180405	T	A	A	A	A	A	A	1	1	0.538462	0.857143	1	0.5	2	4	13	21	3	26	0	1	0	0	0.25	0	0	0	0	0	0	0
23249747	G	A	A	A	A	A	A	1	1	0.545455	0.538462	0.555556	1	9	2	11	13	9	3	0	1	0	0	0	0	0	0	0	0	0	0
40762169	C	T	T	T	T	T	T	0.405405	1	1	1	1	1	37	35	1	10	4	4	0	1	0.772727	0	0	0	0	0	0	0	0	0
3048987	A	G	G	G	G	G	G	0.5625	1	1	1	0.4	1	16	7	3	7	5	17	0.333333	0	0	0	0	0	0	0	0	1	0	0
5904571	G	A	A	A	A	A	A	1	1	0.6	0.583333	1	0.9375	3	6	5	12	8	32	0	0	0	0	0.5	0.5	0.5	0	0	0	0	0
19055753	A	T	T	T	T	T	T	0.615385	0.666667	0.5	0.333333	1	0.5	13	6	10	18	3	10	0	0	0	0	0	0	0	0	0	0	0	0
9650024	T	C	C	C	C	C	C	0.714286	0.714286	0.642857	0.727273	0.785714	0.736842	35	7	14	22	14	38	0	0.714286	0	0	0	0	0	0	0	0	0	0
48027913	C	T	T	T	T	T	T	1	1	1	1	1	1	9	13	2	2	11	6	0	0	0	1	0	0	0	0	0	0	1	0.4
39050948	G	A	A	A	A	A	A	1	1	1	0.571429	0.285714	0.75	14	14	9	14	7	20	0	0	0	0	0	0	0.583333	0	0	0	0	0.428571
44542250	T	G	G	G	G	G	G	1	1	1	1	1	0.647059	13	12	2	11	6	17	0	0.5	0.555556	0.5	0	0	0	0	0	0.5	0	0
57122356	C	G	G	G,T	G	G	G	1	1	1	1	1	1	7	12	4	15	2	3	0	0	0.75	0	0	0	0	0	1	0	0	0.666667
36370964	T	C	C	C	C	C	C	1	0.75	1	0.823529	1	1	6	4	10	17	2	6	0	0	0	0	0	0	0	0	0	1	1	0
23160584	G	A	A	A	A	A	A	1	0.571429	0.8	0.428571	1	0.75	2	14	5	14	5	8	0	0	0	0	0	0	0	0	1	0	0	0
85275549	A	G	G	G	G	G	G	0.6	0.875	0.666667	0.4	1	1	5	8	3	5	7	2	0	0	0	0	0	0	0.5	0	0	0	0	0.5
42718813	C	T	T	T	T	T	T	0.529412	0.684211	0.272727	0.5	0.8	1	17	19	11	14	5	2	0	0	0	0	0	0.25	0	0	0	0	0	0
68468317	C	G	G	G	G	G	G	1	1	1	1	1	1	18	10	3	8	6	3	0	0	0.833333	0	0	0	0.8	0.333333	0.5	0	0	0
6127551	G	A	A	A	A	A	A	0.5	1	1	0.933333	1	1	8	4	5	15	2	4	0	0	0	0.5	0	0	0	1	0	0	0.4	0
47843183	C	A	A	A	A	A	A	0.777778	1	1	0.75	1	1	18	2	1	4	4	13	0	0	1	0	0	1	0	0	0	0	0	0
14226593	A	G	G	G	G	G	G	1	1	1	1	1	0.7	8	8	3	8	15	10	0	0	0	0	0	1	0	0	0.888889	0	0.285714	0
39728941	T	G	G	G	G	G	G	1	0.75	1	1	1	0.583333	11	16	17	18	12	24	0	0	0	0.666667	0	0	0	0	0.590909	0.555556	0	0
5864189	A	C	C	C	C	C	C	0.6	1	0.6	0.65625	1	1	10	4	20	32	20	55	0	0	0	0	0.625	0	0	0.714286	0	0	0	0
47843152	G	A	A	A	A	A	A	0.846154	1	1	0.545455	1	1	26	3	3	11	2	16	0	0	0.875	0	0	1	0	0	0	0	0	0
82542331	C	T	T	T,A	T	T	T	0.37931	1	1	1	0.535714	1	29	13	7	17	28	17	0	0	0	0	0.4	1	0	0	0	0	0	0
112309775	C	T	T	T	T	T	T	1	1	0.617647	0.644444	1	1	3	8	34	45	3	40	0	0.5	0	0	1	0	0	0	0	0	0	0.25
5845815	T	C	C	C	C	C	C	1	1	1	1	1	1	2	3	4	9	8	19	0	1	0.25	0.5	0.75	0	0	0	0	0	0	0
49840271	C	A	A	C,A	A	A	A	1	1	1	1	1	1	5	6	2	3	3	3	1	0	0	1	0	0.5	0	0	0	0	0	0
18936431	G	A	A	A	A	A	A	1	1	1	1	1	1	9	6	4	10	2	2	0	0.5	0	1	1	0	0	0	0	0	0	0
9678818	A	G	G	G,T	G	G	G	1	1	1	1	1	1	2	2	4	8	4	2	0	0	0	1	0	1	0.5	0	0	0	0	0
34785197	A	G	G	G	G	G	G	1	1	1	1	1	1	6	2	4	3	2	7	0	0	1	1	0	0	0	0	0	0	0	0.5
6077824	A	G	G	G	G	G	G	1	1	1	1	1	1	24	2	12	13	3	20	0	0	0	0	1	0	0.833333	0	0	0	0.666667	0
3721769	G	T,A	T	T	T	T	T	1	1	1	1	0.5	1	3	4	3	3	4	2	1	0	0	0	0	0	0	0	1	0	0	0
10251241	G	A	A	A	A	A,T	A	1	1	1	1	1	1	11	16	4	20	17	13	0	0	1	0	0	0	0	1	0	0	0	0.5
104003041	T	C	C	C	C	C	C	1	1	1	1	0.5	1	12	8	2	2	4	5	0	0	0	0	0	0	0	0	0	1	1	0
76669301	T	C	C	C	C	C	C	1	1	1	1	1	1	27	6	5	16	17	14	0	0	0	0.4	0	0	0.4	0	0	0.7	0	1
23247906	T	C	C	C	C	C	C	1	0.823529	0.636364	0.782609	0.666667	1	28	17	11	23	6	6	0	0.6	0.814815	0	0	0	0	0	0	0	0	0
49657396	T	C	C	C	C	C	C	1	0.8	1	0.833333	1	1	9	5	18	12	20	18	0.5	0.666667	0	0.25	0	0	0	0	0	0	0	0.727273
23248000	G	A	A	A	A	A	A	1	0.7	0.636364	0.714286	0.666667	0.882353	37	10	11	21	6	17	0	0.444444	0.666667	0	0	0	0	0	0	0	0	0
23685585	A	G	G	G	G	G	G	0.666667	1	0.615385	0.75	1	1	18	10	13	24	12	10	1	0	0	0.545455	0	0	0	0	0	0	0	0
43053826	A	G	G	G	G	G	G	1	1	1	0.285714	1	1	12	3	2	7	5	5	0	0	0.4	0	0	1	0.4	0	0	0	0	0
20946098	A	G	G	G	G	G	G	0.333333	0.4	1	1	1	1	6	15	9	21	6	10	0.25	0.4	0.6	0	0	0	0	0	0	0	0	0
78830931	A	G	G	G	G	G	G	1	1	0.666667	0.947368	0.555556	0.4	24	15	12	19	9	15	0.5	0	0.28	0	0	0	0.307692	0	0	0	0	0
30425193	A	T	T	T	T	T	T	0.461538	1	0.75	0.666667	1	0.2	13	14	4	15	9	10	0	0	0	0	0	0	0	0	0	0	0.6	0
34466030	C	T	T	T	T	T	T	1	1	0.805556	0.68	1	0.628571	34	36	36	25	13	35	0	0	0	0	0	0	0.64	0.4	0	0	0	0.606061
107927841	T	C	C	C	C	C	C	0.490566	0.428571	1	1	0.617647	0.611111	53	49	23	74	34	18	0	0.68	0	0	0	0	0	0	0	0	0	0
6074417	A	C	C	C	C	C	C	0.555556	1	1	1	1	0.909091	9	2	5	4	4	22	0	1	0	0	1	0	0	0	0	0	0	0
40638518	C	T	T	T	T	T,A	T	1	1	1	1	1	1	8	2	5	4	10	4	0.75	0.666667	0.5	0.333333	0.285714	0	0	0	0	0	0	0
40640192	T	A	A	A	A	A	A	1	0.666667	1	1	1	1	5	3	9	21	12	3	0.4375	0	0.153846	0.857143	0.588235	0.166667	0	0	0	0	0	0
99799450	C	A	A	A	A	A	A	0.75	0.916667	0.666667	0.727273	0.952381	1	12	12	6	11	21	28	0	0	0	0.555556	0	0	0	0	1	0	0	0
23247919	A	G	G	G	G	G	G	1	0.9	0.538462	0.666667	0.666667	1	29	20	13	18	6	11	0	0.5	0.814815	0	0	0	0	0	0	0	0	0
47843180	T	C	C	C,A	C	C	C	0.789474	1	1	0.666667	1	1	19	5	2	6	4	17	0	0	1	0	0	1	0	0	0	0	0	0
40804456	A	G	G	G	G	G	G	1	1	1	1	1	0.454545	6	10	10	2	6	11	0	0	0	0	0	0	1	0	1	0	0	0
23251511	G	A	A	A	A	A	A	1	0.882353	0.333333	0.291667	0.4	0.545455	24	17	12	24	10	33	0	0	0	0	0	0	0	0	0	0	0	0
89331522	A	G	G	G	G	G	G	1	1	1	1	1	1	10	2	6	3	2	5	0	0	0	0	0	0	1	0.75	0	0	0	0.8
11048690	T	A	A	A	A	A	A	0.943925	0.525253	0.538462	0.533981	0.83908	0.567164	107	99	91	103	87	67	0	0.5	0	0	0	0	0	0	0	0	0	0
16067087	T	C	C	C	C	C	C,A	0.538462	0.392857	0.8	1	0.272727	1	13	28	5	6	11	13	0	0	0	0.3	0	0	0	0	0.25641	0	0	0
25587873	G	A	A	A	A	A	A	0.437577	0.998634	1	1	0.437288	0.543716	1618	732	369	817	590	732	0	0	0.538462	0.433708	0	0	0	0	0	0	0	0
16520357	T	C	C	C	C	C	C	0.5	0.444444	1	1	0.5	1	12	9	2	4	4	12	0	0	0	0	1	0	0	0	0	0	0	0
61242589	A	G	G	G	G	G	G	0.496933	0.994595	1	1	1	1	489	185	90	255	445	144	0	0	0.491176	0.54386	0	0.452991	0	0	0	0	0	0.560606
44526889	C	T	T	T	T	T	T	1	1	1	1	0.642857	0.8	11	8	4	9	14	5	0	0	0	0	1	0	0	0	0	1	0	0
43422462	C	G	G	G	G	G	G	1	0.8	1	1	1	1	8	10	8	11	4	3	0	1	0.571429	0.8	0	0	0	0	0	0	0	0
25846900	G	A	C,A	C	C	C	A	0.75	1	1	1	0.666667	1	4	15	5	29	12	20	0	1	1	0	0	0	0	0	0	0	0	0
22097718	T	C	C	C	C	C	C	0.507937	0.708333	1	1	1	0.375	63	24	29	69	55	40	0	0.347826	0	0	0	0.388889	0	0	0	0.444444	0	0
4824157	C	T	T	T	T	T	T	0.409091	0.75	0.761905	0.7	1	1	22	4	21	20	5	49	0	0	0	0	0.714286	0	0	0	0	0	0.5	0
114616915	G	T	T	T	T	T	T	1	1	1	1	1	1	5	2	5	6	8	2	0.6	0	0	0	0	0	0	0	0	1	0	1
174944	A	G	G	G,T	G	G	G	1	1	1	1	1	1	4	2	3	4	2	3	0	0	1	0	0	0	0	0.6	0	0	1	0
10503517	C	T	T	T	T	T	T	1	1	1	1	1	1	2	2	7	4	2	3	0	0	0	0	1	0	1	0	0	0.6	0	0
32398545	G	A	A	A	A	A	A	1	1	1	1	1	1	11	12	11	9	6	11	0	1	0	0	0	0	0	1	0.6	0	0	0
78656011	G	A	A	A	A	A	A	1	1	0.4	0.666667	1	0.333333	4	4	5	6	2	6	0	0	0	0	0	1	0	0	0	0	0	0
35049399	C	T	T	T	T	T	T	0.8	1	1	1	1	1	5	3	3	10	2	10	0.4	0	0	0	0	0	1	1	0	0	0	0
1081415	A	G	G	G	G	G	G	1	1	1	1	0.555556	0.5	2	3	5	6	9	4	0.666667	1	0	0	0	0	0	0	0	0	0	0
38714197	C	A	A	A	A	A	A	0.5	1	0.764706	0.444444	1	1	4	3	17	9	7	6	0.333333	0	1	0	0	0	0	0	0	0	0	0
48870573	T	C	C	C	C	C	C	1	1	1	1	1	1	10	9	4	8	5	3	1	0	0	0.625	0	1	0	0	0	0	0	0
47844995	A	C	C	C	C	C	C	0.375	1	0.6	0.4	1	1	8	10	5	5	7	12	0	0	0	1	0	0	0	0	0	0	0	0
39345888	T	C	C	C	C	C	C	1	0.333333	1	0.818182	1	0.222222	4	9	2	11	2	9	0	0	0	0	0	0.333333	0	0	0	0.666667	0	0
41306654	A	G	G	G	G	G	G	0.6	0.266667	0.444444	1	0.5	1	15	15	9	11	6	13	0	0.4375	0	0	0	0	0	0	0	0	0	0
11051599	G	T	T	T	T	T	T	0.307692	1	1	1	0.5625	1	13	8	10	27	16	3	0	0.5	0	0	0	0	0	0	0	0.666667	0	0.333333
793471	T	C	C	C	C	C	C	1	0.368421	1	1	1	1	15	19	4	13	6	24	0	0	0	0	1	1	0	0	0	0	0	0
5858712	C	T	T	T	T	T	T	0.34375	1	1	0.984375	1	0.96875	32	13	16	64	26	64	0	1	0.125	0.238095	0	0.346154	0	0.230769	0	0	0	0
108469338	A	G	G	G	G	G	G	0.666667	1	1	1	1	0.6875	6	2	2	8	6	16	0	0	1	0	0	0	0	0	0	0	0	1
29914528	G	T	T	T	T	T	T	1	1	0.981132	0.991453	1	0.988636	33	26	53	117	23	88	0	0	0	0	0	0	0	0.977273	0.642857	0	0	1
45908049	T	C	C	C	C	C	C	1	1	1	1	1	1	4	4	3	6	2	3	0	0	0	0	0	1	0.75	0	0	0	0	0.909091
40638514	T	A	A	A	A	A	A	1	1	0.833333	1	1	1	7	2	6	5	11	4	0.75	0.666667	0.5	0.333333	0.25	0	0	0	0	0	0	0
105699256	C	T	T	T,A	T	T	T	1	1	1	0.95	0.8	1	12	4	10	20	15	7	0	0.75	0	0	0.666667	0	0	0	0	0	0	1
2568950	A	C	C	C	C,G	C	C	1	1	1	1	1	1	29	17	2	24	25	9	0	0	1	0	0	0	1	0	0.666667	0	0	0
33124122	C	G	G	G	G	G,T	G	1	1	1	1	1	1	8	2	4	8	4	17	0	0	0	0	0	1	0	1	0	0	0.666667	0
5858187	A	G	G	G	G	G	G	0.571429	1	1	1	1	1	14	8	9	46	6	9	0	0.666667	0.173913	0.285714	0.307692	0.457143	0	0.358974	0	0	0	0
63234875	G	C	C	C	C	C	C	1	1	1	1	0.8	0.909091	35	6	8	12	5	11	0	0.5	0.666667	0.333333	0	0.666667	0.222222	0	0	0	0	0
6038250	G	T	T	T	T	T	T	0.479781	0.929401	0.885395	0.871715	0.930779	0.842329	5119	3187	7600	6735	2427	3298	0	0.898266	0	0	0	0.278605	0	0.445663	0	0	0	0
5866326	C	T	T	T	T	T	T	0.6	1	1	1	1	1	5	4	6	18	16	37	0	1	0.666667	0	0	0.285714	0	0.333333	0	0	0	0
24285685	G	A	A	A	A	A	A	1	1	0.488372	0.423077	1	0.613636	28	46	43	52	9	44	0	0	0	0	0.45	0	0.263158	0	0	0	0	0.5
66789571	G	T	T	T	T	T	T	0.357143	1	1	0.958333	0.428571	0.5	28	11	12	24	7	10	0	0	0	0.444444	0	0.266667	0	0	0	0	0	0.222222
99908181	G	A	A	A	A	A	A	1	1	0.875	1	0.4	0.266667	8	7	8	11	5	30	0	0	0	0	0.571429	0	0	0	0	0	0.666667	0
5574563	G	A	A	A	A	A	A	1	1	1	1	1	0.5	5	11	7	9	10	2	0	0	0	0	0	0	0.6	0.6	0	0	0	1
44721257	T	C	C	C	C	C	C	0.695652	0.52	0.6	0.928571	0.428571	0.625	23	25	15	28	28	16	0	0	0	0	0	0	0	0.5	0	0	0	0
76777648	A	G	G	G	G	G	G	0.466667	1	0.666667	0.454545	1	1	15	1	3	11	3	5	0	0	0.3	0	0	0	1	0	0	0	0	0
118443729	A	G	G	G	G	G	G	1	1	1	1	0.666667	0.285714	13	11	5	3	6	14	0	0	0	0	0	1	0	0	0	0	0.666667	0
30103930	A	G	G	G	G	G	G	1	1	1	1	1	1	14	4	5	11	5	14	0	0	0	0	0.363636	0	0	0.285714	1	0.571429	0	0.5
45521042	T	C	C	C	C	C	C	1	1	1	1	1	1	5	9	5	10	6	8	0.5	0	0.875	0.666667	0	0	0.681818	0	0	0	0	0
5858680	A	G	G	G	G	G	G	0.32	1	1	0.988095	1	0.972603	25	11	15	84	29	73	0	1	0.259259	0	0.25	0.34375	0	0.151515	0	0	0	0
47850445	T	C	C	C	C	C	C	0.444444	1	1	0.411765	0.357143	1	9	23	3	17	14	9	0	0	0.5	0.44	0	0	0	0	0	0	0	0
5856170	T	C	C	C	C	C	C	1	1	0.888889	1	1	1	7	14	9	28	4	9	0	1	0.282609	0.1875	0.421875	0.257143	0	0.466667	0	0	0	0
40638513	C	T	T	T	T	T	T	1	1	0.833333	1	1	1	8	2	6	5	9	4	0.6	0.666667	0.6	0.411765	0.285714	0	0	0	0	0	0	0
51353156	C	T	T	T	T	T	T	0.634409	1	0.490566	0.425926	0.613636	0.6875	93	119	53	108	44	48	0	0.583333	0	0	0	0	0	0	0	0	0	0
39828656	T	A	A	A,G	A	A	A	0.8	0.888889	0.909091	0.62963	1	0.538462	20	9	11	27	5	13	0	0	0	0	0	0	1	0	0	0	0.5	0
70033545	G	C	T	T	T	C	T	1	0.157895	1	1	1	0.272727	2	19	6	7	2	11	0	0	0	0.666667	0	0	0.5	0	0	0	0	0
24320420	C	T	T	T	T	T	T	1	1	0.4	0.655172	1	0.393939	31	25	20	29	30	33	0	0	0	0	0.5	0	0.387097	0	0	0	0	0.304348
41342732	G	T	T	T	T	T	T	1	1	1	0.991228	1	0.978022	51	32	56	114	28	91	0	0	0	0	0	0	0	1	0	0	0.714286	1
23250989	T	C	C	C	C	C	C	1	0.8	0.47619	0.659574	0.617647	0.634146	26	30	42	47	34	41	0	0.333333	0.6	0	0	0	0	0	0	0	0	0
16346780	A	G	G	G	G	G	G	1	1	1	1	1	0.642857	25	16	17	25	22	14	0	0.466667	0	0	0.709677	0	0	0	0.538462	0.351852	0.322581	0
5856076	G	A	A,T	A	A	A	A	0.857143	1	1	1	1	1	7	9	11	24	8	30	0	1	0.386364	0.137931	0.412698	0.37931	0	0.288889	0	0	0	0
4824063	T	A	A	A	A	A	A	0.5	0.833333	0.692308	0.724138	1	1	14	6	13	29	2	40	0	0	0	0	0.545455	0	0	0	0.352941	0	0.6	0
13885924	C	T	T	T,A	T	T	T	1	1	1	1	1	1	14	2	16	23	9	2	0	1	0.25	1	0	0	0	0	0	0	0	0.5
45908022	G	T	T	T	T	T	T	1	1	1	1	1	1	5	7	7	15	2	3	0	0	0	0	0	1	0.75	0	0	0	0	1
54937798	C	T	T	T	T	T	T	1	1	1	1	0.75	1	5	3	2	5	4	3	0	0	0.5	0	0	0	1	0	0	1	0	0
78829827	G	A	A	A	A	A	A	1	1	0.333333	0.555556	0.375	0.583333	26	15	9	9	16	12	0	0	0.6	0	0	0	0	0	0	0	0	0
47843828	G	A	A	A	A	A	A	0.466667	1	0.428571	0.684211	1	1	15	5	7	19	2	10	0	0	0.666667	0.666667	0	0	0	0	0	0	0	0
6038634	T	C	C	C	C	C	C	0.660714	0.988636	0.916667	0.833333	0.827586	0.876838	56	176	48	156	116	544	0	0.4	0.333333	0.555556	0.352941	0.217391	0	0	0	0	0	0
5133612	C	T	T	T	T	T	T	0.846154	1	1	1	0.6	0.916667	13	3	3	19	20	12	0	1	0.444444	0.230769	0	0.444444	0	0	0	0	0	0
9649084	G	C	C	C	C	C	C	0.693548	0.543478	0.4	0.288288	0.625	0.689655	62	46	60	111	32	58	0	0	0	0	0	0	0	0	0	0	0	0
8863331	T	C	C	C	C	C	C	0.333333	1	1	0.961538	1	1	15	14	9	26	2	9	1	0	0.5	0	0	0	0	0	0	0.555556	0	0
50617912	G	C	C	C	C	C	C	0.3	0.8125	0.5	0.352941	1	0.5	10	16	6	17	9	4	0	0	0	0	0	0	0	0.230769	0	0	0	0
17885339	A	C	C	C	C	C	C	0.977273	1	1	1	0.454545	0.4375	44	9	19	56	22	32	0	0	0	0.636364	0	0	0	0	1	0	0	0
45285026	A	G,T	G	G	G,T	G	G	1	1	1	0.888889	1	1	3	3	2	9	4	3	0	0	0	0.666667	0	0	0	0	1	1	0	0
63522810	T	C	C	C	C	C	C	0.578947	1	0.444444	0.490196	1	0.7	19	24	36	51	41	30	0	0	0	0	0.5	0	0.5	0	0	0	0	0
1080385	C	T	T	T	T	T	T	1	0.804348	1	1	0.6	0.857143	38	46	25	32	5	7	0.533333	1	0	0	0	0	0	0.52381	0	0	0	0
134225633	T	C	C	C	C	C	C	1	1	1	1	1	1	7	4	6	13	12	5	0	1	0	0	0.8	0	0	0	1	0	0	0
62293371	G	A	A	A	A	A	A	1	1	1	1	1	1	3	6	4	8	8	26	1	0	0	0	0	0	0	0	0	0.8	1	0
55906608	G	T	T	T	T	T	T	1	1	1	1	1	1	2	11	4	6	6	3	0	0	0	1	1	0.8	0	0	0	0	0	0
25846880	G	A	A	A	A	A	A	0.75	1	1	1	0.444444	1	4	13	4	25	18	18	0	1	1	0	0	0	0	0	0	0	0	0
79104881	A	T	T	T	T	T	T	1	1	1	0.857143	1	1	6	3	12	7	5	4	1	0	0	0	0	0	0	1	0.666667	0	0	0
40638775	G	A	A	A	A	A	A	1	0.625	1	1	1	1	2	8	11	19	5	2	0.2	0.833333	0.25	0.444444	0.714286	0	0	0	0	0	0	0
48532513	T	A	A	A	A	A	A	1	1	1	1	1	1	7	9	3	5	2	7	0	0	0	0.444444	0	0	0.375	0	0	0	1	1
25499083	C	A	A	A	A,T	A	A	1	1	1	1	1	1	7	7	6	10	3	3	0.222222	0	0	0.4	0	1	0.2	0	1	0	0	0
65441165	A	G	G	G	G	G	G	1	1	1	0.666667	1	1	4	4	3	3	3	5	0	0.5	0	1	0	0	0	0	0	0	0	1
174972	A	G	G	G	G	G	G	1	1	1	1	1	1	4	2	2	4	2	3	0	0	1	0	0	0	0	0.333333	0.5	0	1	0
8783581	A	G	G	G	G	G	G	1	1	0.666667	0.5	1	1	8	7	3	10	8	5	0	0	0	0	0	1	0	0	1	0	0	0
4775993	G	C	C	C	C	C	C	0.5	0.666667	1	1	1	1	6	6	2	5	4	2	1	0	0	0	0	0	0	0	0	1	0	0
8784631	A	C	C	C	C	C	C	1	1	0.5	0.666667	1	1	13	18	14	3	17	6	0	1	0	0	0	0	0	0	0	0	0	1
107915210	C	G	G	G	G	G	G	0.5	0.371429	1	1	0.666667	0.428571	16	35	2	9	6	14	0	0.8	0	0	0	0	0	0	0	0	0	0
50645455	C	T	T	T	T	T	T	0.333333	1	1	1	1	0.625	9	3	4	5	10	8	0	0	0	0	0	0.625	0	0.333333	0	0.5	0	0.333333
53709772	C	T	T	T	T	T	T	0.724138	0.4	1	1	0.555556	1	29	15	2	3	9	6	0	0	0.214286	0	1	0	0.3	0	0	0	0	0
93464961	A	G	G	G	G	G	G	0.941176	0.3	0.8	1	0.75	0.666667	17	10	5	3	4	3	0	0	0	0	0	0	0	0	0	0.571429	0.5	0.222222
82542230	G	A	A	A	A	A	A	0.733333	1	1	1	0.428571	1	15	5	5	8	7	17	0	0	0	0	1	1	0	0	0	0	0	0
18035636	T	C	C	C	C	C	C,A	1	1	1	1	0.571429	1	28	7	15	9	7	5	0.478261	0.5	0.368421	0.230769	0	0.833333	0	0	0	0	0	0
8794491	A	G	G	G	G	G	G	0.466667	1	0.722222	0.681818	0.242424	1	45	36	18	22	33	33	0	0	0	0	0	0	0.75	0	0	0	0	0.214286
5872962	T	C	C	C	C	C	C	0.555556	1	0.2	0.619048	0.666667	0.458333	9	4	10	21	6	24	0	0	0	0	0.352941	0	0	0	0	0	0	0
102664941	C	T	T	T,A	T	T	T	0.607143	1	1	0.64	0.675676	0.5	56	23	15	25	37	32	0	0.944444	0	0	0	0.333333	0	0	0	0	0	0
22097530	C	T	T	T	T	T	T	0.520833	0.6	1	1	1	0.511111	96	35	40	37	66	45	0	0.566667	0	0	0	0.5	0	0	0	0.425	0	0
40489877	G	A	A	A,T	A	A	A	1	0.777778	1	1	1	1	12	9	7	16	6	7	0	0	0.4	0.714286	0.857143	0	0.666667	0	0	0	0	0
116661925	A	G	G	G	G	G	G	1	1	1	1	0.555556	1	18	3	3	9	9	15	1	0	0.75	0	0	0.666667	0	0	0	0	0	0
32191031	A	T	T	T	T	T	T	0.571429	0.8	0.333333	0.5	0.6	1	7	5	21	18	5	22	0	0	0.666667	0	0	0	0	0	0	0	0	0
62457535	T	C	C	C	C	C	C	0.58427	1	1	1	1	1	89	69	45	63	31	64	0	0.52381	0	0	0	0	0	0	0.382979	0.545455	1	0
40638501	T	C	C	C	C	C	C	0.75	1	1	1	1	1	8	2	10	5	12	4	0.75	0.5	0.6	0.4375	0.333333	0	0	0	0	0	0	0
10730096	A	G	G	G	G	G	G	1	1	1	1	1	0.333333	9	10	20	21	3	6	0	0	0	0	0	1	0	0	0	0.75	0.454545	0
73642254	A	T	T	T	T	T	T	0.96	1	1	0.964286	1	1	25	10	18	28	24	35	0	0	0.8	1	0	0	0	1	0	0	0	0
16859817	C	T	T	T,G	T,G	T	T	1	1	0.8	1	1	1	3	2	5	12	3	5	0	0	0	0.846154	0	0	1	0	0	0	0.333333	0.5
22995934	G	A	A	A	A	A	A	0.426036	0.515152	1	1	1	0.678571	169	165	82	118	111	56	0	1	0.5	0	0	0	0	0	0	0	0	0
76878562	T	C	C	C	C	C	C	0.605263	0.682927	0.423077	0.433962	1	0.533333	38	41	26	53	34	15	0	0.321429	0	0	0.242424	0	0	0	0	0	0	0
92064220	C	T	T	T	T	T	T	0.235294	0.387097	0.555556	0.527473	0.40625	1	34	31	54	91	32	116	0	0	0	0	0	0	0	0	0	0	0	0
77543235	A	G	G	G	G	G	G	1	1	1	1	1	1	4	10	6	12	4	49	0	0	0.5	0	1	0	0.6	0	0	0	0.363636	0.434783
5874104	A	G	G	G	G	G	G	1	1	0.666667	0.8	1	1	2	4	3	15	7	35	0	0	0.333333	0.75	0	0.5	0.333333	0.25	0	0.2	0	0
103066176	C	A	A	A	A	A	A	0.933333	0.625	0.9	0.761905	1	0.875	15	8	10	21	11	16	0.5	0	0.333333	0	0.5	0	0	0	0	0	0	0.666667
5848351	T	G	G	G	G	G	G	1	1	1	1	1	0.952381	2	2	10	26	7	42	0	0	0	0	0.857143	1	0	1	0	0	0	0
40638708	C	T	T	T	T	T	T	1	0.571429	1	1	1	1	4	7	10	16	6	2	0.375	0.857143	0	0.5	0.75	0	0	0	0	0	0	0
6124973	G	C	C	C	C	C	C	0.869565	0.777778	0.909091	0.6	0.928571	1	23	18	22	30	14	6	0	0	0	0	0	0	0	1	0	0	0	1
40213435	T	C	C	C,A	C	C	C	0.75	0.666667	1	1	0.666667	1	4	3	10	6	6	16	1	0	0	0	0	0	0	0	0	0	1	0
83266846	T	C	C	C	C	C	C	0.375	0.411765	1	1	1	1	40	17	14	41	12	18	0.470588	0	0.478261	0.461538	0.153846	0.142857	0	0	0	0	0	0
40638756	G	A	A	A,C	A	A	A	1	0.666667	1	1	1	1	2	9	12	15	5	2	0.285714	0.857143	0.333333	0.4	0.714286	0	0	0	0	0	0	0
23250673	G	C	C	C	C	C	C	1	0.626016	0.642336	0.669725	0.556701	0.573427	144	123	137	218	97	143	0	0.56	0.435644	0	0	0	0	0	0	0	0	0
99788155	A	G	G	G	G	G	G	0.72	0.347826	0.764706	0.5	0.916667	1	25	23	17	40	36	35	0	0.777778	0	0	0.4	0	0	0	0	0	0	0
37546674	C	G	G	G	G	G	G	1	1	1	1	1	0.692308	9	9	8	17	8	13	0	0	0	0	1	0.4	0	0.222222	0	0	1	0
47966816	G	A	A	A,T	A	A	A	1	1	0.818182	1	1	0.25	12	16	11	19	3	8	0	0	1	0	0	0	0	0	0	0	0	1
56338384	T	C	C	C	C	C	C	0.634441	0.494898	1	1	0.480392	0.576923	331	588	175	368	102	156	0.448276	0.670588	0	0	0	0	0	0	0	0	0	0
83821518	C	T	T	T	T	T	T	1	1	0.5	0.666667	1	0.5	15	2	6	3	2	8	0	0	0.6	0	1	0	0	0	0	0	0	0
5844301	C	T	T	T	T	T	T	0.285714	1	1	1	1	1	7	5	10	18	9	43	0	1	0.333333	0.222222	0	0.666667	0	0	0	0	0	0
112645539	C	T	T	T	T	T	T	1	0.474138	1	1	1	1	232	116	66	173	148	124	0.5	0	0	0.355932	1	0.555556	0	0	0	0	0	0
44777231	T	A	A	A	A	A	A	1	1	0.6	0.888889	1	0.5	2	2	5	9	10	8	0	0	0	0	0	0	1	0	0	0.5	0	0.428571
62746809	C	T	T	T	T,A	T	T	1	1	1	1	1	0.833333	13	7	13	17	4	6	0	0	0	0	0.375	1	0.4	0	0	0	0	1
61918566	T	C	C	C	C	C	C	0.512397	1	0.571429	0.651852	1	0.59322	121	96	63	135	73	59	0	0	0	0	0.375	0	0.4375	0.458333	0	0	0	0
8785193	A	T	T	T	T	T	T	1	0.583333	0.571429	0.5	1	1	15	12	14	30	9	32	0	0	0	0	0	0	0.6	0	0	0	0	1
2970625	T	A	A	A	A	A	A	0.454545	0.363636	1	0.636364	1	0.59375	11	11	2	11	11	32	0	0	0	1	0	0	0	0	0	0	0	0
5844306	G	A	A	A	A	A	A	0.285714	1	1	0.958333	1	1	7	5	8	24	8	42	0	1	0.333333	0.2	0	0.666667	0	0	0	0	0	0
33615074	A	G	G	G	G	G	G	0.444444	1	0.625	1	0.5	0.4	9	8	8	20	4	5	0	0	0	0	0	0	0	0	0.176471	0	0.75	0
28333463	G	A	A	A	A	A	A	0.434457	0.981073	0.903846	0.892216	0.987382	0.606218	267	634	104	167	317	386	0	0.915966	0	0.25	0	0	0	0	0	0.25	0.347826	0
115573110	C	T	T	T	T	T	T	0.558824	0.407407	1	0.957447	0.31746	0.8	68	54	50	94	63	30	0	0	0	0	0	1	0	0	0	0	0	0
80734261	G	A	A	A	A	A	A	1	1	0.764706	0.875	1	0.5	6	3	17	16	5	8	1	0	0	0	0	0	0.6	0	0.5	0	0	0
96331027	G	A	A	A	A	A	A	0.642857	0.8	1	0.833333	1	0.636364	14	10	2	12	9	11	0	0	1	0	0	0.5	0	0	0	0	0.375	0
1079835	T	G	G,A	G	G	G	G	1	0.705882	1	1	0.5625	0.684211	37	17	6	18	16	19	0.454545	0.9375	0	0	0	0	0	0.526316	0	0	0	0
4823855	A	G	G	G	G	G	G	0.75	0.714286	0.285714	0.566667	1	1	8	7	14	30	5	38	1	0	0	0	0	0	0	0	0	0	0.285714	0
23250676	G	A	A	A	A	A	A	1	0.608333	0.644444	0.662037	0.55102	0.526316	144	120	135	216	98	152	0	0.549296	0.415842	0	0	0	0	0	0	0	0	0
82543501	C	T	T	T	T	T	T	0.521739	1	1	1	1	1	23	10	8	22	12	8	1	0	0	0.25	0.25	1	0	0	0	0	0	0
50550948	G	A	A	A	A	A	A	0.999336	0.998681	0.468165	0.487518	0.467702	0.447007	1505	1516	267	681	1610	1821	0	0	0	0	0.436364	0.417351	0	0	0	0	0	0
5858654	T	C	C	C	C	C	C	0.2	1	1	0.986667	1	0.967742	20	15	16	75	31	62	0	1	0.304348	0	0.275362	0.384615	0	0.176471	0	0	0	0
75005196	C	T	T	T	T	T	T	1	1	1	1	1	0.346154	21	21	5	13	14	26	0	0.571429	0.375	0	0.444444	0	0	0	0	0.611111	0.333333	0
27308991	C	T	T	T	T	T	T	0.4	0.945455	1	1	0.481481	1	30	55	34	51	27	9	0	1	0.40625	0.25	0.166667	0	0	0	0	0	0	0
4235307	T	C	C	C	C	C	C	1	1	1	1	1	1	14	5	2	10	9	4	0	1	1	0	1	0	0	0	0	0	0	0
69000307	A	G	G	G	G	G	G	1	1	1	1	1	1	3	4	4	2	4	4	1	0	1	0	0	1	0	0	0	0	0	0
69000322	G	A	A	A	A	A	A	1	1	1	1	1	1	4	4	4	2	4	4	1	0	1	0	0	1	0	0	0	0	0	0
69000331	T	A	A	A	A	A	A	1	1	1	1	1	1	4	4	4	2	4	4	1	0	1	0	0	1	0	0	0	0	0	0
73478318	G	A	A	A,T	A	A	A	1	1	1	1	1	1	3	5	3	11	5	3	0	1	0	1	0	1	0	0	0	0	0	0
64650203	A	G	G	G	G	G	G	1	1	1	1	1	1	5	9	6	6	2	10	0	0	1	1	0	1	0	0	0	0	0	0
115470766	C	A,T	A	A,T	A	A	A	1	1	1	1	1	1	5	2	3	5	2	3	0	1	1	0	0	1	0	0	0	0	0	0
37259722	T	C	C	C	C	C	C	1	1	1	1	1	1	6	10	8	5	9	3	0	1	1	0	0	1	0	0	0	0	0	0
15241531	G	A	A	A	A	A	A	1	1	1	1	1	1	14	8	2	12	3	10	0	0.666667	0.5	0.833333	0	1	0	0	0	0	0	0
5753607	A	G	G	G	G	G	G	1	1	1	1	1	1	2	4	7	3	7	5	0	0	1	1	1	0	0	0	0	0	0	0
8956870	C	T	T	T	T	T	T	1	1	1	1	1	1	2	2	4	5	4	2	1	0	1	1	0	0	0	0	0	0	0	0
16978157	T	C	C	C	C	C	C	1	1	1	1	1	1	6	3	7	3	3	4	0	0	1	1	1	0	0	0	0	0	0	0
26508577	T	C	C	C	C	C,A	C	1	1	1	1	1	1	8	4	5	50	10	6	0	0	1	1	0	1	0	0	0	0	0	0
5844226	C	T	T	T	T	T,A	T	0.444444	1	1	1	1	1	9	4	4	17	5	31	0	1	0.444444	0	0	1	0	0	0	0	0	0
7926333	N	T	T	T	T	T	T	1	1	1	1	1	1	64	94	35	79	47	29	0	1	0	0	1	0	0	1	0	0	0	0
107308834	A	G	G	G	G	G	G	1	1	1	1	1	1	5	10	6	6	4	3	1	0	0	0	1	0	0	0	0	0	1	0
9835297	T	A	A	A	A	A	A	1	1	1	1	1	1	2	2	10	9	2	2	0	1	0	0	0	1	0	1	0	0	0	0
46852179	T	C	C	C	C	C	C	1	1	1	1	1	1	4	12	5	19	2	2	0	0	0	1	1	0	0	0	0	1	0	0
50845703	T	C	C	C	C	C	C	1	1	1	1	1	1	9	11	25	32	12	4	0	0	1	1	0	0	0	0	1	0	0	0
5570948	A	G	G	G	G	G	G	1	1	1	1	1	1	6	4	4	5	1	2	0	0	0	1	1	0	0	0	0	0	1	0
5570949	T	C	C	C	C	C	C	1	1	1	1	1	1	6	6	12	9	4	8	0	0	0	1	1	0	0	0	0	0	1	0
13888465	C	T	T	T	T	T	T	1	1	1	1	1	1	9	8	2	3	2	4	0	1	0	1	0	0	0	1	0	0	0	0
29922669	T	G	G	A	A	G	G	1	1	1	1	1	1	4	3	3	3	9	4	1	0	0	1	0	0	0	0	0	0	1	0
38955692	T	C	C	C	C	C	C	1	1	1	1	1	1	3	8	2	4	4	7	0	1	0	0	0	1	0	0	0	0	1	0
8447450	T	C	C	C	C	C	C	1	1	1	1	1	1	6	9	4	5	4	7	0	0	1	1	0	0	0	0	0	1	0	0
110341099	T	C	C	C	C	C	C	1	1	1	1	1	1	7	2	1	4	2	4	0	0	1	1	0	0	0	0	0	0	1	0
63446561	T	C	C	C	C	C	C	1	1	1	1	1	1	20	47	22	79	98	80	0	1	0	0	1	0	0	1	0	0	0	0
100476083	N	T	T	T	T	T	T	1	1	1	1	1	1	16	17	6	26	16	9	0	0	1	1	0	0	0	0	1	0	0	0
57238092	G	T	T	T	T	T	T	1	1	1	1	1	1	3	2	8	13	4	7	0	0	1	0	1	0	0	0	0	0	0	1
14509827	A	G	G	G	G	G	G	1	1	1	1	1	1	5	3	4	18	4	19	0	1	0	1	0	0	0	0	0	0	0	1
36547522	C	T	T	T	T	T	T	1	1	1	1	1	1	19	10	2	27	13	3	0	0	1	0	1	0	0	0	0	0	0	1
116661014	A	G	G	G	G	G	G	1	1	1	1	1	1	11	4	2	3	2	16	1	1	0	0	0	0	0	0	0	0	0	1
80927941	T	C	C	C	C	C	C	1	1	1	1	1	1	3	5	2	4	5	10	0	1	0	0	1	0	0	0	0	0	0	1
62288696	T	A	A	A	A	A	A	1	1	1	1	1	1	2	4	2	2	2	2	0	0	1	0	0	0	0	1	0	0	1	0
69574233	C	G	G	G	G	G	G	1	1	1	1	1	1	23	47	6	68	43	24	1	0	0	0	0	0	0	1	0	1	0	0
62341180	A	G	G	G	G	G	G	1	1	1	1	1	1	3	4	5	7	3	4	0	0	0	0	0	1	0	1	0	1	0	0
29896816	G	A	A	A,T	A	A	A	1	1	1	1	1	1	3	6	3	2	2	7	0	0	0	0	0	1	1	0	0	1	0	0
9916573	A	G	G	G	G	G	G	1	1	1	1	1	1	5	3	2	12	2	10	0	0	0	0	0	1	0	0	1	1	0	0
69423862	G	A	A	A	A	A	A	1	1	1	1	1	1	6	11	5	3	2	10	0	0	0	1	0	0	1	1	0	0	0	0
15261571	T	A	A	A	A	A	A	1	1	1	1	1	1	2	8	4	4	2	2	1	0	0	0	0	0	0	1	1	0	0	0
49751814	C	T	T	T	T	T	T	1	1	1	1	1	1	15	5	7	8	2	3	0	0	0	1	0	0	0	0	1	0	1	0
77313127	C	G	G	G	G	G	G	1	1	1	1	1	1	3	2	2	3	2	9	0	0	0	0	0	1	0	0	1	0	1	0
81753309	T	G	G	G	G	G	G	1	1	1	1	1	1	3	5	4	5	2	3	0	0	0	0	1	0	0	0	1	0	1	0
61476317	A	T	T	T	T	T	T	1	1	1	1	1	1	5	3	2	2	6	4	0	0	0	0	0	1	1	0	0	0	1	0
76121801	T	C	C	C	C	C	C	1	1	1	1	1	1	8	2	4	3	13	16	0	0	0	1	0	0	1	0	0	0	1	0
105380513	C	T	T	T	T	T	T	1	1	1	1	1	1	11	8	2	11	10	29	0	0	0	0	0	1	1	0	0	1	0	0
67798179	C	T	T	T,A	T	T	T	1	1	1	1	1	1	10	4	7	16	4	8	0	0	0	1	0	0	1	0	0	0	0	1
102699401	N	A	A	A	A	A	A	1	1	1	1	1	1	14	3	4	6	2	10	0	1	0	0	0	0	0	0	0	0	1	1
15619560	A	G,T	G	G	G	G	G	1	1	1	1	1	1	7	2	3	12	3	4	0	0	0	1	0	0	0	0	0	0	1	1
33423542	T	C	C	C	C	C	C	1	1	1	1	1	1	2	5	9	4	3	3	0	0	1	0	0	0	1	0	0	0	0	1
6117415	G	A,C	A	A	A	A	A	1	1	1	1	1	1	6	7	15	20	11	29	0	0	0	0	0	1	0	1	0	0	0	1
44968577	G	A	A	A	A	A	A	1	1	1	1	1	1	4	6	2	3	2	5	0	0	0	0	0	1	1	0	0	0	0	1
43186900	A	G	G	G	G	G	G	1	1	1	1	1	1	16	3	2	26	15	8	0	0	1	0	0	0	0	0	0	0	1	1
14944416	C	G	G	G	G	G	G	1	1	1	1	1	1	4	7	2	2	2	9	0	0	1	0	0	0	0	0	0	1	0	1
46045468	C	T	T	T	T	T	T	1	1	1	1	1	1	4	2	3	4	4	6	0	0	0	0	1	0	0	0	1	0	0	1
31228817	T	A	A	A	A	A	A	1	1	1	1	1	1	3	4	5	12	2	3	1	0	0	0	0	0	0	0	0	0	1	1
19792114	G	A	A	A	A	A	A	1	1	1	1	1	1	6	4	4	2	4	3	0	0	1	0	0	0	0	0	0	0	1	1
143192716	C	G	G	G	G	G	G	1	1	1	1	1	0.5	8	7	10	13	5	4	0	0	0	1	0	0	0	0	1	0	0	0.5
21573503	C	T	T,A	G,T,A	T	T,A	T	1	1	1	1	1	1	6	6	3	6	6	5	0	0	0	0	1	1	0	0	0	0	1	0
48923294	T	C	C	C	C	C	C	1	1	1	1	1	1	21	9	16	22	8	36	0	1	0	0	1	1	0	0	0	0	0	0
12712511	C	G	G	G	G	G	G	1	1	1	1	1	1	4	5	8	16	9	15	0	0	0	0	0	0	1	0	0	1	1	0
43250033	A	G	G	G	G	G	G	1	1	1	1	1	1	2	2	3	2	4	5	0	0	0	0	0	0	0	0	0	1	1	1
48816533	G	C	C	C	C	C	C	1	1	1	1	1	1	7	9	2	1	3	5	0	0	0	0	0	0	0	1	0	0	1	1
61927916	A	C	C	C	C	C	C	1	0.8	0.75	1	1	0.8	13	5	4	5	5	5	0	1	0	0	0	0	0.75	0	0	0	0	0.6
84134629	G	A	C	A	A	A	A	1	0.2	0.5	0.5	0.615385	0.705882	30	20	6	18	13	17	0	0	0	0.521739	0	0	0	0	0	0	0	0
96317522	C	T	T	T	T	T	T	1	0.888889	1	1	1	0.5	2	9	2	8	10	4	0.4	0	1	0	1	0	0	0	0	0	0	0
5844246	G	T	T	T	T	T	T	0.285714	1	1	1	1	1	7	5	4	19	6	36	0	1	0.3	0	0	1	0	0	0	0	0	0
109733562	T	C	C	C	C	C	C	0.235294	0.833333	1	1	0.375	0.375	17	6	6	14	8	8	0	0	0.333333	0	0	0	0	0.5	0	0	0	0
16865202	G	A	A	A	A	A	A	1	0.3125	1	1	1	1	2	16	2	7	6	2	0	0	1	0	0	0	0	0	0	0	0.333333	1
16509059	G	T	T	T	T	T	T	0.481481	0.724138	0.3	0.967742	0.346154	0.653846	27	29	20	31	26	26	0	0	0	0	0	0.5	0	0	0	0	0	0
60235437	C	T	T	T	T	T	T	1	1	1	0.571429	1	1	3	2	2	7	2	4	0	0	0	0	1	0	0	0	0	0.6	0	1
34535834	A	G	G	G	G	G	G	0.705882	1	0.75	0.583333	0.857143	0.875	17	4	8	12	7	8	0	0	0.8	0	0	0	0	0	0	1	0	0
103473501	A	G	G	G	G	G	G	0.384615	1	1	0.785714	0.8	1	13	5	6	14	5	2	0	0	0	0	0	0	0	0	0	1	0	1
5858386	C	A	A	A	A	A	A	0.714286	1	0.954545	0.893333	1	1	7	5	22	75	12	47	0	1	0.431818	0	0.243902	0.516129	0	0.4	0	0	0	0
107971404	C	T	T	T	T	T	T	0.434783	0.333333	0.909091	1	0.285714	1	23	12	11	12	7	10	0	1	0	0	0	0	0	0	0	0	0	0
38614942	C	T	T	T,G	T	T	T	1	1	0.969697	1	1	0.972477	210	168	33	194	112	109	1	0	1	0	0	0	0	0	0	0	0	0.983333
69944829	G	A	A	A	A	A	A	0.512195	1	1	1	1	0.444444	41	14	12	20	23	9	0	0.5	0	0.647059	0.315789	0	0	0	0	0	0	0.538462
100801377	T	C	C	C	C	C	C	0.44795	0.449153	0.992883	0.992308	0.411844	0.509901	951	472	281	520	743	404	0	0.413879	0	0	0	0	0.437722	0	0	0	0	0
1080810	A	G	G	G	G	G	G	1	0.657143	1	1	0.75	0.606061	76	35	24	33	16	33	0.444444	1	0	0	0	0	0	0.617647	0	0	0	0
60618387	G	T	T	T	T	T	T	1	1	1	1	0.857143	1	2	6	5	10	7	2	0	0	0.909091	0	1	0	0	0	0	0	0	1
5858387	C	G	G	G	G	G	G	0.714286	1	0.958333	0.910256	1	1	7	6	24	78	12	51	0	1	0.431818	0	0.243902	0.5625	0	0.4	0	0	0	0
61919287	G	A	A	A	A	A	A	0.524752	1	0.581395	0.505882	1	0.5	101	42	43	85	35	68	0	0	0	0	0.545455	0	0.1875	0.4375	0	0	0	0
96885635	G	A	A	A	A	A	A	0.984375	1	1	1	0.71875	0.418605	64	30	22	60	32	43	0	0.416667	0	0	0.692308	0.571429	0	0	0	0	0	0.5
12623470	A	G,T	G	G,T	G,T	G	G	1	1	1	1	0.941176	1	15	5	9	15	17	4	0	0	1	1	0	0	0	0	0	1	0	0
130708720	G	T	T	T	T	T	T	0.587396	0.573587	0.69403	0.673712	0.635989	0.600343	1682	1522	2814	2271	728	2332	0	0	0	0	0	0	0	0	0.440133	0.384321	0	0
6038062	G	T	T	T	T	T	T	0.587571	1	0.994709	1	1	1	177	155	189	285	154	155	0	1	0.22381	0.292683	0.223404	0.384615	0	0.521739	0	0	0	0
71462379	G	A	A	A	A	A	A	1	1	1	1	1	1	9	7	2	8	2	4	0	0	1	0	0	0.5	1	0	0	0.307692	0.259259	0
100801338	A	G	G	G	G	G	G	0.429769	0.43318	0.996933	0.993182	0.43038	0.508516	954	434	326	440	790	411	0	0.433692	0	0	0	0	0.432432	0	0	0	0	0
100531925	A	G	G	G	G	G	G	0.916667	0.75	1	1	1	1	12	4	2	9	7	2	0	0	1	0.75	0	0	0	0	0	0	0	1
68113774	G	A,C	A,C	A,C	A,C	A,C	A,C	0.967742	0.969697	1	0.978261	1	1	31	33	3	46	14	19	1	0	1	0	0	0	1	0	0	0	0	0
82542368	T	C	C	C	C	C	C	0.387097	1	1	1	0.6	1	31	16	10	20	30	18	0.5	0	0	0.142857	0.428571	1	0	0	0	0	0	0
40966791	A	C	C	C	C	C	C	1	1	1	1	1	1	30	5	8	34	11	6	0	0.75	0.75	0.588235	1	0	0	0	0	0	0	0
55756601	A	G	G	G	G	G	G	1	0.8	1	1	1	1	5	5	4	13	6	7	0	0	1	0	0	1	0	0	0	0	0.888889	0
22628898	C	T	T	T	T	T	T	0.307692	1	1	1	1	0.2	13	2	3	7	5	20	0	0	0	0	0.6	0	0	0	0	0	1	0
100802723	G	A	A	A	A	A	A	0.466874	0.45392	0.994231	0.994949	0.426982	0.471111	966	727	520	594	719	450	0	0.460473	0	0	0	0	0.445583	0	0	0	0	0
42576057	G	T	T	T	T	T	T	1	0.384615	1	1	0.516129	1	5	13	21	42	31	21	0	0	0	0	0	0	0	1	1	0	0	0
56664338	C	T	T	T,A	T	T	T	0.272727	0.791667	1	1	1	0.444444	33	24	6	29	25	9	0	0.928571	0	0	0	0	0	0.444444	0	0.235294	0	0
46821175	T	A	A	A	A	A	A	0.529644	0.996644	0.461538	0.42029	1	0.574468	253	298	130	207	125	235	0.571429	0.510638	0	0	0	0	0	0	0	0	0	0
98100533	G	A	A	A	A	A	A	1	1	0.972973	0.927273	1	1	2	2	37	55	10	5	1	0	0	1	0	0	0	0	0	0	1	0
5858382	A	G	G	G	G	G	G	0.714286	1	0.962963	0.897436	1	1	7	6	27	78	13	56	0	1	0.4	0	0.25	0.571429	0	0.454545	0	0	0	0
40639463	G	A	A	A	A	A	A	1	0.4	1	1	1	1	3	5	3	12	7	6	0.4	1	0.8	0	0.307692	0	0	0	0	0	0	0
41342932	T	C	C	C	C	C	C	0.970588	1	0.8	1	0.833333	1	34	13	10	91	24	37	0	0	0	0	0	0	0	1	0	0	1	0.714286
89861606	C	A	A	A	A	A	A	1	1	1	1	1	1	4	3	3	6	7	17	1	0	0	0	1	0.666667	0	0	0	0	0	0.444444
5858388	C	A	A	A	A	A	A	0.714286	1	0.958333	0.911392	1	1	7	6	24	79	13	51	0	1	0.418605	0	0.271605	0.53125	0	0.473684	0	0	0	0
8938209	A	G	G	G	G	G	G	1	1	1	1	1	1	6	15	7	18	2	18	0	0	0	0.285714	0	1	1	0.333333	0	0	0	0.5
5859719	C	T	T	T	T	T	T	0.372549	1	0.987654	0.921569	1	1	51	28	81	153	35	101	0	0.9	0.323009	0.255319	0.35219	0.305732	0	0.266129	0	0	0	0
5858385	A	C	C	C	C	C	C	0.666667	1	0.952381	0.876712	1	0.98	6	5	21	73	12	50	0	1	0.409091	0	0.236842	0.551724	0	0.4	0	0	0	0
69574439	C	A	A	A	A	A	A	1	1	1	1	0.875	1	5	20	13	14	8	13	0	1	0	1	0	0	0	0	1	0	0	0
5856194	C	G	G	G	G	G	G	0.846154	1	1	1	1	1	13	10	7	23	6	10	0	1	0.333333	0.227273	0.5	0.318182	0	0.59375	0	0	0	0
21674817	C	T	T	T	T	T	T	0.475309	0.5	1	0.981132	1	1	162	120	22	106	114	31	0	0	0	0	0	0.380952	0	0	0.337349	1	0.365591	0
112645623	T	A	A	A	A	A	A	1	0.388235	0.982143	0.991453	0.995885	1	361	170	112	234	243	153	0.393939	0	0	0.55814	0.984848	0.548872	0	0	0	0	0	0
5842718	T	G	C	C	C	C	C	1	1	1	0.571429	1	0.3	2	3	8	7	2	10	0	0	1	0	1	0	0	0	0	0	0	0
112645571	C	A	A	A	A	A	A	0.990164	0.377143	0.946809	0.995349	1	0.991453	305	175	94	215	207	117	0.457447	0	0	0.381579	1	0.592593	0	0	0	0	0	0
8785302	G	A	A	A	A	A	A	1	0.4	0.466667	0.571429	1	1	23	15	15	28	13	30	0	0	0	0	0	0	0.571429	0	0	0	0	1
103473480	T	C	C	C,A	C	C	C	0.461538	1	1	0.733333	0.666667	1	13	7	7	15	3	3	0	0	0	0	0	0	0	0	0	1	0	1
107921117	A	G	G	G	G	G	G	0.222222	0.65	1	1	0.272727	0.214286	27	20	4	16	22	28	0	0.5	0	0	0	0	0	0	0	0	0	0
58013201	T	A	A	A	A	A	A	1	0.857143	1	1	1	1	3	7	2	5	6	2	0	1	0	0	0	0	0	1	0	0	1	0
6124732	C	T	T	T	T	T	T	0.571429	0.692308	0.769231	0.851852	0.894737	1	21	13	13	27	19	13	0	1	0	0	0	0	0	0.923077	0	0	0	0
76776811	C	T	T	T	T	T	T	0.53125	1	0.333333	0.285714	1	1	32	5	6	14	13	12	0	0	0.642857	0	0	0	0	0	0	0	0	0.666667
28123981	A	G	G	G,T	G	G,T	G	0.9375	0.928571	0.842105	1	0.954545	1	80	56	19	33	22	20	0.884615	0	0.938462	0	1	0	0	0	0	0	0	0
5857197	C	A	A	A	A	A	A	0.791667	1	1	1	1	1	48	62	156	210	42	223	0	1	0.337209	0.461538	0.345178	0.323529	0	0.486957	0	0	0	0
5854409	T	A	A	A	A	A	A	0.5	1	1	0.933333	1	1	12	3	12	15	12	35	0	0	0.6	0	1	0	0	1	0	0	0	0
23652457	T	A	A	A	A	A	A	1	1	0.833333	1	1	1	2	3	6	7	3	10	1	0	0	1	0	0	1	0	0	0	0	0
19862626	C	A	A	A	A	A	A	1	1	1	1	1	1	4	11	2	7	7	3	0	0	0	0.666667	1	0	0.5	0	0	0	1	0
28127847	C	T	T	T	T	G	T	1	1	1	1	1	1	11	4	10	16	2	3	0	0	1	0	0	0	0.666667	1	0	0	0	0.5
265661	A	G	G	G	G	G	G	0.375	0.888889	0.285714	0.5	1	0.75	8	18	14	6	18	8	0	0.333333	0	0	0	0	0	0.384615	0	0	0.25	0
5857876	C	T	T	T	T	T	T	0.894737	1	1	1	1	1	19	11	35	59	19	71	0	1	0.3125	0.333333	0.467742	0.459016	0	0.491525	0	0	0	0
102665876	A	T	T	T	T	T	T	0.535211	1	0.391304	0.26	0.733333	0.666667	71	49	23	50	45	27	0	0.321429	0	0	0	0.434783	0	0	0	0	0	0
54202528	C	T	T	T,A	T	T	T	1	0.5625	1	1	1	0.266667	10	16	9	23	3	15	0	0	0	0	1	0	0	1	0	0	0	0
68557469	T	C	C	C	C	C	C	1	0.454545	1	1	0.235294	0.416667	1	22	10	26	17	24	1	0	0	0	0	0	0	0.277778	0	0	0	0
23254561	A	G	G	G	G	G	G	0.966667	0.463768	0.652174	0.5625	0.558824	0.571429	30	69	46	80	34	84	0	0.5	0.447368	0	0	0	0	0	0	0	0	0
40485919	T	G	G	T	G	G	G	1	0.6	1	1	1	1	12	10	2	10	12	6	0	0	0.5	0.777778	0	0	1	0	0	0	0	0.5
56767286	A	C	C	C	C	C	C	1	1	0.953125	0.863636	1	1	6	15	64	22	7	26	0	1	0	1	0	0	0	1	0	0	0	0
42720469	C	T	T	T	T	T	T	0.55	0.277778	0.478261	0.631579	0.769231	1	40	18	23	38	13	21	0.444444	0	0	0.45	0	0	0	0	0	0	0	0
21686711	T	C	C	C	C	C	C	0.727273	0.75	1	1	1	1	11	4	2	9	3	3	0	0	0	0	0	0	0.666667	0	0	1	0	1
112645570	A	G	G	G	G	G	G	0.990132	0.431138	0.98913	1	1	1	304	167	92	221	207	117	0.521739	0	0	0.459459	1	0.622642	0	0	0	0	0	0
129009337	C	T	T	T	T	T	T	0.761905	1	1	1	0.75	0.916667	21	2	15	14	8	12	0	1	0	0.625	0	0	0	0	0	0	0	1
27602577	G	A	A	A	A	A	A	0.955556	1	1	1	0.428571	1	45	29	7	42	14	16	0	0	0.777778	0.862069	0	0	0	0	0	0	0	0.941176
99788154	C	G	G	G	G	G	G	0.72	0.347826	0.705882	0.47619	0.942857	1	25	23	17	42	35	34	0	1	0	0.2	0	0	0	0	0	0.190476	0	0
61792512	A	T	T	T	T	T	T	0.8	1	1	1	1	1	5	2	2	15	8	2	1	0	1	0	0	0	0	0	0	0	0	1
16113659	T	C	C	C	C	C	C	1	1	0.8	1	1	1	8	3	5	9	7	3	0	0	0	1	0	0	0	0	0	1	0	1
7781394	A	T	T	T	T	T	T	0.8	1	0.5	0.571429	1	0.928571	5	11	4	7	3	14	0	0	0	0	0	0	0	1	1	0	0	0
112645622	T	A	A	A	A	A	A	0.997191	0.385965	0.980952	0.982379	0.975	0.993243	356	171	105	227	240	148	0.402062	0	0	0.554217	1	0.560606	0	0	0	0	0	0
53049191	T	C	C	C	C	C	C	1	1	1	1	1	0.666667	8	6	2	4	7	12	0	0	0.875	1	0	0	0	0	0	0	1	0
71416776	G	A	A	A	A	A	A	0.538462	1	1	1	1	0.769231	26	40	44	36	30	26	0	0.695652	0.464286	0	0.411765	0	0.24	0	0	0	0	0.707692
75934406	G	A	A	A	A	A	A	1	0.785714	1	1	1	1	8	14	6	3	3	7	0	0	0	1	0	1	0	0	0	0	1	0
57914136	T	C	C	C	C	C	C	1	1	1	1	0.5	1	6	12	7	7	6	5	0	0	1	0	1	0	0	0	0	0.714286	0	0
4823907	C	G	G	G	G	G	G	0.636364	1	0.454545	0.294118	1	1	11	2	11	17	2	41	0	0	1	0	0.6	0	0	0	0	0	0	0
23251014	G	T	T	T	T	T	T	1	0.571429	0.3125	0.642857	0.5	0.62963	18	14	32	42	24	27	0	0.375	0.5	0	0	0	0	0	0	0	0	0
25854748	A	T	T	T,C	T	T	T	0.777778	1	1	1	1	1	9	6	2	9	5	2	0	0	1	1	0	1	0	0	0	0	0	0
5853164	C	T	T	T	T	T	T	0.625	1	1	1	1	1	8	3	23	31	4	31	0	1	0	0	0.833333	0.416667	0	0.6	0	0	0	0
38786685	C	T	T	T	T	T	T	0.454545	0.4	1	1	1	1	11	15	3	8	6	4	0	0.333333	0	0	0	0.75	0	0	0	0	0	1
107680877	A	G	G	G	G	G	G	0.833333	1	1	1	0.6	1	6	3	3	3	5	9	0	0	0	0	0.666667	1	0	0	0	1	0	0
5868274	G	T	T	T	T	T	T	0.8	1	1	1	1	1	5	10	2	13	5	17	0	1	0	0	0.75	0.285714	0	1	0	0	0	0
5856042	A	G	G	G	G	G	G	0.6	1	1	1	1	1	5	10	12	26	9	34	0	1	0.375	0.21875	0.478873	0.368421	0	0.395349	0	0	0	0
10220560	A	C	C	C	C	C	C	1	0.76	1	1	0.684211	0.5	108	75	28	63	19	32	0.566667	1	0	0	0	0	0	0.615385	0	0	0	0
26660309	G	A	A	A	A	A	A	1	1	1	1	0.75	1	10	6	4	3	4	14	0	0	0.52381	0.636364	0	0	1	0	0	0.230769	0.6	0
90539378	A	C	C	C	C	C	C	0.8	1	1	0.875	1	1	5	15	5	8	11	7	0	0	1	0.75	0	0.666667	0	0.5	0	0	0	0
6086290	A	T	T	T	T	T	T	0.285714	0.588235	0.571429	0.891892	0.789474	0.963636	28	17	14	74	19	55	0	0	0	0	0	0	0	1	0	0	0	0.333333
57004082	T	C	C	C	C	C	C	0.631579	1	0.5	0.772727	1	0.823529	19	10	4	22	10	17	0	0	0.375	0	0	0	0	0.6	0	1	0	0
42147637	C	G	G	G	G	G	G	0.478261	0.65	1	1	1	1	23	20	12	39	12	13	0	0.777778	0	0	0	0.6	1	0	0	0	0	0
4236395	A	C	C	C	C	C	C	1	1	1	1	0.75	1	2	9	3	20	4	2	0	0	1	1	1	0	0	0	0	0	0	0
45610836	T	G	G	G	G	G	G	1	1	0.75	1	1	1	4	2	12	12	3	2	1	0	1	0	0	0	0	0	1	0	0	0
16858254	A	G	G	G	G,T	G	G	1	0.75	1	1	1	1	8	8	1	4	6	2	1	0	0.333333	0	0.666667	0	1	0	0	0	0	0
25757605	G	A	A	A	A	A	A	1	1	1	1	1	1	4	2	2	8	2	4	0	0	0	0	0	0	0	1	0	1	1	0.25
6064181	T	C	C	C	C	C	C	1	1	1	1	1	0.181818	4	6	4	4	5	22	0	0	0.6	0.5	0.833333	0	0	0.5	0	0	0	0
98100532	A	G	G	G	G	G	G	1	1	0.923077	0.824561	1	1	2	2	39	57	10	5	1	0	0	1	0	0	0	0	0	0	1	0
1081111	T	C	C	C	C	C	C	1	0.676471	1	1	0.714286	0.5	58	34	13	27	14	12	0.526316	1	0	0	0	0	0	0.619048	0	0	0	0
18625105	A	G	G	G	G	G	G	1	0.714286	0.8	0.5	0.444444	0.666667	20	7	5	4	9	3	0	0.285714	0	0	0	0	0.666667	0.428571	0	0	0	0
27676610	A	G	G	G	G	G	G	0.833333	1	0.333333	0.642857	1	1	12	8	6	14	5	4	0.666667	0	0	0	0.4	0	0	1	0	0	0	0
59430237	G	C	C	C	C	C	C	0.394737	0.875	0.769231	0.6	0.833333	0.5	38	16	13	25	18	20	0	0.4	0	0	0.454545	0	0	0	0	0.375	0	0
62433537	G	C	C	C	C	C	C	0.263158	1	1	1	1	1	19	11	4	14	4	11	0.222222	0.5	0	0	0	0	0	0	0	0.8	1	0
40485160	G	A	A	A	A	A	A	1	0.545455	1	1	1	1	21	11	9	17	5	16	0	0	0.6	0.571429	0.666667	0.666667	0.3	0	0	0	0	0
27308996	A	G	G	G	G	G	G	0.444444	0.948276	0.972973	1	0.4	1	27	58	37	53	20	9	0.2	1	0.387097	0.259259	0.181818	0	0	0	0	0	0	0
5857772	G	A	A	A	A	A	A	0.733333	1	1	1	1	1	15	15	37	58	22	95	0	1	0.27451	0.444444	0.406061	0.47619	0	0.402985	0	0	0	0
28332239	T	G	G	G	G	G	G	0.714286	0.25	1	1	0.875	0.888889	14	8	15	19	8	18	0	0	1	1	0	0	0	0	0	0	0	0
61721902	T	G	G	G	G	G	G	0.333333	0.777778	1	1	0.7	0.583333	12	18	4	4	10	12	0	1	0	0	0	0.666667	0	0	0	0	0	0
69434886	T	C	C	C	C	C	C	0.454545	0.75	0.454545	0.571429	1	0.655172	11	8	11	7	14	29	0	0	0.875	0	0	0.285714	0	0	0	0	0	0
70948346	A	G	G	G	G	G	G	0.666667	0.666667	1	1	1	0.941176	9	3	8	3	11	17	0	0	0.428571	0.454545	0	0	0	1	0	0.666667	0	0
57926380	T	C	C	C	C	C	C	0.7	1	1	1	0.857143	1	10	3	4	8	7	2	0	0	1	0.833333	0	0	0	0	0	1	0	0
34067762	A	G	G	G,T	G	G	G	0.555556	0.5	1	1	1	0.35	27	18	14	32	11	20	0	0.5	0	0.3	0.285714	0	0	0	0	0	0	0.6
7895258	G	C	C	C	C	C	C	1	1	1	1	1	0.636364	29	11	25	24	7	22	1	0	0.2	0.555556	0	0.666667	0	0	0	0.5	0	0
89832940	C	T	T	T,G	T	T	T	1	1	1	1	1	1	4	2	2	4	3	3	0	0	0.75	0.454545	1	0	0	0.583333	0	0.5	0	0
111156479	G	T	T	T	T	T	T	1	1	0.923077	1	1	1	7	8	13	8	7	9	0	1	0	1	0.75	0	0	0	0	0	0	0.461538
40640026	T	G	G	G	G	G	G	0.666667	0.6	0.333333	0.5	0.666667	0.944444	3	5	6	32	6	18	0.361111	0	0	0	0.642857	0	0	0	0	0	0	0
5862983	G	A	A	A	A	A	A	1	1	0.916667	1	0.95	0.981132	4	3	12	46	20	53	0	1	0.521739	0.5	0.1875	0.266667	0	0.666667	0	0	0	0
71111967	G	A	A	A	A	A	A	0.52381	0.368421	0.72973	0.8	0.5	0.779817	21	19	37	35	14	109	0	0	0	1	0	0	0	0	0	0	0	0
89325272	T	C	C	C	C	C	C	1	1	1	1	1	0.7	6	10	10	14	3	10	0	0	1	1	0	1	0	0	0	0	0	0
40804505	T	C	C	C	C	C	C	1	1	1	1	1	0.7	7	5	7	16	5	10	0	0	0	0	0	0	1	1	1	0	0	0
40804511	T	C	C	C,A	C	C	C	1	1	1	1	1	0.7	6	6	8	16	5	10	0	0	0	0	0	0	1	1	1	0	0	0
19182569	G	A	A	A	A	A	A	1	1	1	0.7	1	1	3	4	2	10	4	3	0	0	0	0	0	0	1	0	1	0	0	1
400735	A	C	C	C	C	C	C	0.352941	0.25	0.653846	0.594203	0.416667	0.431373	34	20	26	69	24	51	0	0	0	0	0	0	0	0	0	0	0	0
56241498	A	T	T	T	T	T	T	0.857143	0.5	1	0.642857	0.6	0.375	7	8	13	14	5	8	0	0	0.529412	0.555556	0	0	0	0	0	0	0	0.192308
58405961	G	A	A	A	A	A	A	1	1	1	1	0.777778	0.6	21	34	20	52	9	30	0.727273	0	0.521739	0.5	0.307692	0	0	0.625	0	0	0	0
28078873	T	C	C	C	C	C	C	1	1	1	1	1	0.294118	13	7	10	12	18	17	0	1	0	0.3125	0	0	0	0	0.555556	0.304348	0.428571	0
61238098	A	G	G	G	G	G	G	0.625	1	1	1	1	1	24	16	16	26	8	2	0	0	1	0.833333	0	0.5	0	0	0	0	0	0.6
6037996	C	T	T	T	T	T	T	0.567742	1	0.994444	0.981818	1	1	155	133	180	220	118	107	0	1	0.258741	0.345133	0.246154	0.492754	0	0.511628	0	0	0	0
25854752	C	T	T	T	T	T,A	T	0.8	1	1	0.888889	1	1	10	6	2	9	5	2	0	0	1	1	0	1	0	0	0	0	0	0
83266939	G	A	A	A	A	A	A	0.4	0.375	1	1	1	1	35	16	12	20	5	26	0.416667	0.5	0.413793	0.259259	0	0.5	0	0	0	0	0	0
23254566	C	T	T	T	T	T	T	1	0.462687	0.627907	0.525641	0.529412	0.593023	30	67	43	78	34	86	0	0.625	0.432432	0	0	0	0	0	0	0	0	0
72489768	G	A	A	A	A	A	A	1	1	1	1	1	0.678571	16	12	4	11	12	28	0	0	1	0	0	0	0	0	1	0	1	0
89505559	A	C	C	C	C	C	C	1	1	1	1	1	0.47619	26	10	27	33	9	21	0.714286	0	0	0	0	0	0.4	0.428571	0.375	0.363636	0.285714	0.230769
33608329	A	G	G	G	G	G	G	0.714286	1	1	1	1	0.588235	7	14	31	47	7	17	0	0	0	0	0	0	0	0.380952	0.576923	0.666667	1	0
136961114	T	G	G	G	G	G	G	0.666667	0.222222	0.333333	0.363636	0.714286	0.375	6	18	9	11	7	8	0	0	0	0	0	0	0	0	0	0	0	0
65067841	C	A	A	A	A	A	A	0.703704	0.565217	0.6	0.615385	0.814815	0.578947	27	23	5	13	27	19	0	0	0.333333	0	0	0	0	0.428571	0	0.444444	0	0
46612020	T	C,A	C	C	C	C	C	1	0.968254	0.953125	0.846154	0.958333	0.897436	77	63	64	52	48	39	0	0	0.980392	0	1	0	0	0	0	0	0	0.971223
27193800	T	C	C	C	C	C	C	1	0.962025	0.833333	0.992248	1	0.883333	99	79	6	129	32	60	0	1	1	0	0	0	0	0	0	0	0	1
40258542	A	C	C	C	C	C	C	0.909091	1	0.5	0.636364	0.75	1	11	3	4	11	4	6	0	0	0.625	0	1	0.5	0	0	0	0	0	0
54509348	T	C	C	C	C	C	C	0.577465	0.993007	0.428571	0.403509	0.422819	0.418803	142	143	49	57	149	117	0	0	0	0	0	0	0	0.576087	0	0	0	0
113648068	G	C,A	C	C,A	C,A	C	C	1	1	1	1	1	1	14	7	7	15	7	23	0	0	0.6	1	0	1	0	0	0.733333	0	0	0
83598500	A	G	G	G	G	G	G	1	1	1	1	1	1	7	6	2	5	6	10	1	1	0	0	0.333333	0	0	0	0	1	0	0
57866448	A	G	G	G	G	G	G,T	1	1	1	1	0.5	1	5	7	2	3	4	9	0	0	0.5	0	1	0	1	0	0.333333	0	0	0
67807981	G	A	A	A	A	A	A	0.666667	1	1	1	1	1	6	2	11	6	2	2	0	1	0	0	0	0	0	1	1	0	0	0
33639438	G	A	A	A	A	A	A	1	1	0.25	0.5	1	0.666667	10	8	8	22	5	30	0	0	0	1	0	0	0	0.75	0	0	0	0
3805506	T	C	C	C,A	C	C	C	1	1	1	1	1	1	4	3	6	2	2	5	0	0.666667	0	1	0	0	1	0	0	0	0	0.666667
31431118	G	T	T	T	T	T	T	1	0.333333	1	1	1	0.333333	5	6	6	18	7	9	0	0	0	0	0	1	0	0	1	0	0	0
62341152	T	C	C	C	C	C	C	1	1	1	1	1	1	2	4	8	18	2	4	0	0	0	0	0	1	0	1	0	0	0.666667	0.666667
5859758	C	T	T	T	T	T	T	0.45	1	0.992366	0.936842	1	1	60	36	131	190	54	146	0	0.957447	0.335306	0.232044	0.368671	0.424837	0	0.395604	0	0	0	0
2168815	T	C	C	C	C	C	C	0.652542	1	1	1	1	0.673203	118	72	52	155	73	153	0.24	0	0.47	0.950495	1	0	0	0	0	0	0	0
18252782	T	C	C	C	C	C	C	0.351351	0.945946	0.974359	0.983193	1	1	74	37	78	119	6	76	0	1	0	0	0	0	0	0.923077	0	0	0.666667	0
5857131	A	G	G	G	G	G	G	0.829268	1	1	1	1	1	41	46	164	275	43	166	0	1	0.394052	0.440789	0.359574	0.413043	0	0.561069	0	0	0	0
36978114	T	C	C	C	C	C	C	1	1	0.581395	0.516129	1	0.8	29	20	43	31	23	5	0	0.5625	0.217391	0	0.727273	0.733333	0	0	0	0	0	0
62304351	G	T	T	T	T	T	T	0.7	1	1	1	1	0.285714	20	2	10	15	7	28	0	0	0	0	0	0	0	1	1	0	0.333333	0
65528957	A	G	G	G,T	G	G	G	1	1	1	1	0.4	1	16	5	4	8	5	6	0	0	0	1	1	0	0	0	0	0	0	0.75
27308964	T	C	C	C	C	C	C	0.333333	0.941176	1	1	0.5	0.818182	33	51	34	46	24	11	0.222222	1	0.405405	0.142857	0	0.176471	0	0	0	0	0	0
60450665	C	T	T	T	T	T	T	0.424528	1	1	1	0.544554	0.598684	212	180	83	171	101	152	0.411765	0	0	0	0.564103	0.492754	0	0	0	0	0	0.453488
20456248	A	G	G	G	G	G,T	G	0.888889	1	1	1	1	1	9	5	2	12	10	3	1	0	0	0	0	0.5	0.5	0	0	0	0.8	0.444444
27223315	A	C	C	C	C	C	C	1	1	1	1	1	1	6	7	5	13	4	7	0.357143	0	1	0	0	0	0	1	0	1	0	0
47564319	T	C	C	C	C	C	C	1	1	0.75	0.666667	0.5	0.681818	15	21	4	12	4	22	0	0	0.333333	0	0	0	1	0	0	0	0	0.625
16038170	T	C	C	C	C	C	C	0.909091	1	0.4	0.818182	1	0.272727	11	19	5	11	5	22	0	0.333333	0	0	1	0	0	0	0	0	0	0.428571
69276457	A	G	G	G	G	G	G	1	1	1	1	1	1	3	7	4	7	3	5	0.666667	0	0.5	0.5	0	0	0.6	0	0	0	0.666667	0.428571
72241687	T	C	C	C	C	C	C	0.454545	1	0.5625	0.818182	0.5	0.454545	11	3	16	22	6	22	0	0.75	0	0	0	0	0	0	0.166667	0	0	0.235294
400736	G	T	T	T	T	T	T	0.352941	0.238095	0.615385	0.577465	0.384615	0.468085	34	21	26	71	26	47	0	0	0	0	0	0	0	0	0	0	0	0
27677020	A	G	G	G	G	G	G	1	1	1	1	1	0.636364	9	3	12	3	5	11	1	0	0	0	0	0	1	0	0	1	0	0
10144224	A	T	T	T	T	T	T	1	1	1	0.882353	1	0.416667	17	14	8	17	4	12	1	1	0.666667	0	0	0	0	0	0	0	0	0
25854889	G	T	T	T	T	T	T	0.631579	1	1	1	1	1	19	6	5	11	5	2	0	0	1	1	0	1	0	0	0	0	0	0
12503926	A	T	T	T	T	T	T	0.540541	0.625	1	1	1	0.53125	37	16	44	69	19	32	0	0	0	0	0	0.666667	0	0	0	1	0	0.4
44740876	T	C	C	C	C	C	C	0.965517	1	1	1	1	1	29	30	20	24	7	20	1	0	0	0	0.466667	0	0	0.727273	0.416667	0	0.727273	0
63454993	A	G	G	G	G	G	G	0.576923	0.263158	0.538462	0.625	0.473684	1	26	38	13	8	19	10	0.25	0	0.6	0	0	0	0	0	0	0	0	0
15468638	A	G	G	G	G	G	G	1	1	0.653846	0.604167	1	0.483871	50	31	26	48	15	31	0	1	0	0	0.333333	0	0.181818	0	0	0.266667	0	0.333333
61242665	C	T	T	T	T	T	T	1	1	1	1	1	1	5	2	8	6	7	11	0	0	0.375	1	0	1	0	0	0	0	0	1
67509534	A	T	T	T	T	T	T	0.969697	1	0.4	0.4	0.346154	0.909091	33	12	5	5	26	11	0	0	0	1	0.4	0	0	0	0	0	0	0
107915143	G	A	A	A	A	A	A	0.47619	0.228571	1	1	0.333333	0.3	21	35	3	14	9	10	0	0.714286	0	0	0	0	0	0	0	0	0	0
4823060	T	C	C	C	C	C	C	0.543478	0.789474	0.481481	0.482759	1	1	46	19	27	29	8	20	0	0	0	0	0.5625	0.666667	0	0	0	0	0.444444	0
14599036	A	G	G	G	G	G	G	0.888889	0.166667	1	1	1	1	27	18	16	8	5	24	0.6	0	1	0.333333	0	0.5	0	0	0	0	0	0
5857428	C	T	T	T	T	T	T	0.6	1	1	0.989418	1	1	30	29	83	189	33	155	0	1	0.245455	0.304348	0.272727	0.6	0	0.54878	0	0	0	0
5857892	G	A	A	A	A	A	A	0.941176	1	1	1	1	1	17	14	33	55	16	57	0	1	0.37931	0.447368	0.475728	0.456522	0	0.564516	0	0	0	0
44425545	T	C	C	C	C	C	C	0.5	1	1	1	0.916667	1	4	4	2	6	12	3	0	1	0.8	0	0	0	0	1	0	0	0	0
67575554	C	T	T	T	T	T	T	0.651163	1	1	1	1	0.507042	43	23	23	48	12	71	0.727273	1	0	0.285714	0	0.533333	0	0	0	0	0	0
37989408	C	G	G	G	G	G	G	1	1	1	1	1	1	165	167	110	248	124	134	0	0.428571	0.984496	0	0.54386	0	1	0	0	0	0	0.431579
1080984	T	C	C	C	C	C	C	1	0.857143	1	1	0.571429	0.375	57	21	11	34	14	8	0.513514	1	0	0	0	0	0	0.678571	0	0	0	0
27673022	T	C	C	C	C	C	C	0.833333	1	0.4	1	1	1	6	4	5	7	2	4	0	0	0	0	1	0	0	0	0	0	1	0.625
5858455	G	C	C	C	C	C	C	0.666667	1	1	1	1	1	6	17	26	58	21	104	0	1	0.457627	0.177778	0.404762	0.522727	0	0.5	0	0	0	0
10094845	A	G	G	G	G	G	G	1	1	1	1	1	1	5	3	7	7	3	4	1	1	0	0	1	0	0	0	0	0.4	0	0
20834738	C	A	A	A	A	A	A	1	1	1	1	1	0.6	3	2	3	4	2	15	0	0	0	0	1	0	1	0	0	0	0	1
25089801	T	C	C	C	C	C	C	0.6	1	1	1	1	1	10	6	10	4	2	15	0	1	1	0	0.5	0.5	0	0	0	0	0	0
116193317	G	A	A	A	A	A	A	0.448718	0.571429	0.492308	0.458824	0.414634	0.621622	78	49	65	85	82	111	0	0	0	0.415094	0	0	0	0	0	0	0	0
19843289	C	A	A	A	A	A	A	0.47106	0.516299	0.99308	0.990282	0.529851	1	1123	951	578	1029	536	764	0.497076	0	0.458465	0	0	0.477764	0.476886	0	0	0	0	0
4223260	A	C	C	C	C	C	C	1	1	0.981818	1	0.305556	1	40	37	55	97	36	25	0.5	0	1	0.2	1	0	0	0	0	0	0	0
24877810	G	A	A	A	A	A	A	1	0.636364	1	0.75	1	1	2	11	7	16	5	5	0	0	0	1	0	1	0	0	0	0	0.8	0
127888297	C	G	G	G	G	G	G	0.5	1	0.666667	0.5	1	1	16	11	6	4	2	3	0.75	0	0	0	0	1	0.333333	0	0	0	0	0
61238562	A	T	T	T	T	T	T	0.294118	1	1	1	0.956522	1	17	18	13	17	23	2	0	0	1	0.666667	0	0.466667	0	0	0	0	0	0.542857
67798094	G	A	A	A	A	A	A	1	1	1	1	1	1	8	9	7	11	4	7	0	0	0.428571	1	0	1	0	0	0	0	0	1
4823089	G	T	T	T	T	T	T	0.5	0.681818	0.461538	0.6	1	1	44	22	26	25	9	19	0	0	0	0	0.588235	0.666667	0	0	0	0	0.421053	0
109975864	T	C	C	C	C	C	C	0.363636	0.736842	1	0.4	0.4	0.666667	11	19	2	5	5	3	0	0	0	0	0	0	0	0	1	0	0	0
6086291	A	C	C	C	C	C	C	0.241379	0.588235	0.428571	0.890411	0.789474	0.962264	29	17	14	73	19	53	0	0	0	0	0	0	0	1	0	0	0	0.333333
23252900	C	A	A	A	A	A	A	1	0.38961	0.493671	0.605263	0.60274	0.542857	142	154	79	152	73	140	0	0.483333	0.585859	0	0	0	0	0	0	0	0	0
39731304	T	C	C	C	C	C	C	1	0.631579	0.984848	0.973684	1	0.516129	44	19	66	114	32	62	0	1	0	0.8	0	0	0	0	0.445	0.297297	0	0
39829115	A	G	G,T	G	G	G	G	0.75	1	1	1	1	0.285714	12	10	2	15	18	21	0	0	0	0	0	0	1	1	0	0	0.473684	0
127252636	C	G	G	G	G	G	G	0.857143	1	0.727273	0.833333	1	0.888889	7	4	11	12	2	18	1	0	1	0	0	0	0.75	0	0	0	0	0
19383405	C	T	T	T	T	T	T	1	0.555556	1	1	1	1	22	18	17	65	17	23	0	1	1	0	0	1	0	0	0	0	0	0
49907689	T	C	C	C	C	C	C	0.545455	0.636364	1	0.666667	0.692308	0.363636	11	11	3	3	13	11	0	0	0	0.6	0	0	0.75	0	0	0	0	0
5857852	C	T	T	T	T	T	T	0.75	1	1	0.981481	1	0.975309	16	15	31	54	22	81	0	1	0.405405	0.358491	0.438356	0.485714	0	0.465517	0	0	0	0
5856396	A	G	G	G	G	G	G	0.818182	1	1	1	1	1	11	12	9	17	3	17	0	1	0.529412	0.322581	0.446429	0.545455	0	0.422222	0	0	0	0
22804234	G	C	C	C	C	C	C	0.583333	1	1	1	1	1	12	22	4	25	11	40	0	0	0	0	0	0.7	0	0.333333	1	0	0	1
45437156	T	C	C	C	C	C	C	0.551724	1	1	1	1	0.714286	29	32	11	27	33	7	0	0.527778	0.925926	0.285714	0.363636	0.615385	0	0	0	0	0	0
5857271	A	G	G	G	G	G	G	0.684211	1	1	1	1	1	38	51	164	262	45	269	0	1	0.376761	0.40884	0.418552	0.365672	0	0.567568	0	0	0	0
23520988	A	C	C	C	C	C	C	1	1	1	1	1	1	7	11	2	5	5	11	0	0	0.4	0	0	0	1	0.333333	0.5	0.222222	1	0
10220180	G	A	A	A	A	A	A	1	0.635714	1	1	0.5	0.568182	150	140	48	77	48	44	0.594937	1	0	0	0	0	0	0.56962	0	0	0	0
5859750	C	T	T	T	T	T	T	0.47541	1	1	0.929348	1	1	61	34	120	184	51	140	0	0.953488	0.382609	0.293413	0.411248	0.411765	0	0.413793	0	0	0	0
23253094	A	G	G	G	G	G	G	1	0.541985	0.456311	0.433333	0.557143	0.490909	156	131	103	210	70	110	0	0.459459	0.482353	0	0	0	0	0	0	0	0	0
6111086	A	G	G	G	G	G	G	0.545455	0.777778	0.212121	0.294118	1	0.288889	11	9	33	34	9	45	0	0	0.25	0	0.333333	0	0	0	0	0	0	0
108692570	G	A,T	A	A	A	A	A	1	0.333333	1	1	1	1	12	9	2	23	17	7	0	1	0	0.8	0	0	0.5	0	0.5	0	0	0
5857293	C	T	T	T	T	T	T	0.647059	1	1	1	1	1	34	35	137	204	35	182	0	1	0.392713	0.393064	0.386091	0.324786	0	0.618357	0	0	0	0
5956183	C	T	T	T	T	T	T	1	1	0.826087	0.903226	0.8	1	11	13	23	31	5	35	0	1	0	0	0	1	0	1	0	0	0	0
4822332	C	T	T	T	T	T	T	0.5	0.333333	0.692308	0.833333	1	1	8	6	13	30	6	15	0	0	0	0	0	0.5	0.833333	0	0.5	0	0	0
5857470	A	C	C	C	C	C	C	0.5	1	0.990196	0.982353	1	0.984252	16	16	102	170	19	127	0	1	0.323529	0.307692	0.241379	0.565217	0	0.5	0	0	0	0
99869921	A	G	G	G	G	G	G	0.6	0.388889	0.909091	0.705882	0.833333	1	20	36	11	17	30	38	0	0.304348	0	1	0.615385	0	0	0	0	0	0	0
52814199	A	G	G	G	G	G	G	1	1	1	1	0.538462	1	38	21	3	9	13	7	0	0	0	0.5	0	0.666667	0.333333	0.4	0	0.625	0	0.5
38712446	A	G	G	G,T	G	G	G	0.428571	1	1	1	0.333333	0.888889	7	12	13	20	15	18	1	0	0.6	0.538462	0	0	0	0	0	0	0	0
77512700	C	T	T	T	T	T	T	0.5	0.411765	1	1	0.6	1	14	17	4	17	5	12	0	1	0	0	0	1	0	0	0	0	0	0
42616334	C	G	G	G	G	G	G	1	1	1	1	1	0.666667	2	9	2	8	2	3	0	1	0	0.727273	0.4375	1	0	0	0	0	0	0
67364847	T	C	C	C	C	C	C	1	1	1	1	1	1	33	31	33	22	19	13	0.444444	1	0.414634	0.431818	0	0	0	0.516129	0.692308	0	0	0
6942116	G	A	A	A	A	A	A	1	1	1	1	1	1	4	4	4	2	3	2	0	1	1	0	1	0	0	0.5	0	0	0	0
89325332	T	C	C	C	C	C	C	1	1	1	1	1	0.5	9	7	4	10	2	14	0	0	1	1	0	1	0	0	0	0	0	0
25846972	A	T	T	T	T	T	T	0.833333	1	1	1	0.666667	1	6	18	3	27	6	27	1	1	1	0	0	0	0	0	0	0	0	0
114198556	A	G	G	G	G	G	G	0.5	1	1	1	1	1	14	6	2	8	10	4	0	1	1	0	1	0	0	0	0	0	0	0
10251210	A	G	G	G,T	G	G	G	1	1	1	1	1	1	12	9	5	22	19	14	0	0	1	1	0	0	0	1	0	0	0	0.5
39903328	G	A	A	A	A	A	A	1	1	1	1	1	0.5	2	2	7	19	2	8	0	1	0	1	0	0	0	0	0	0	0	1
6086292	A	C	C	C	C	C	C	0.206897	0.588235	0.466667	0.888889	0.777778	0.945455	29	17	15	72	18	55	0	0	0	0	0	0	0	1	0	0	0	0.375
5862413	C	T	T	T	T	T	T	1	1	1	1	1	1	4	3	26	52	11	71	0	1	0.5	0.526316	0.470588	0.37931	0	0.625	0	0	0	0
49657582	T	G	G	G	G	G	G	1	0.636364	0.470588	0.333333	0.958333	1	14	11	17	15	24	32	0	0.7	0	0.380952	0	0	0	0	0	0	0	0.823529
1080961	A	G	G	G	G	G	G	1	0.894737	1	1	0.454545	0.6	64	19	10	43	11	10	0.605263	1	0	0	0	0	0	0.85	0	0	0	0
38247890	A	T	T	T	T	T	T	1	0.9	1	1	0.642857	0.5	29	10	12	16	14	20	0.714286	0.5	0	0	0.333333	0	0.352941	0	0	0	0	0.65
5859260	A	G	G	G	G	G	G	0.378378	1	1	1	1	1	37	27	53	169	41	173	0	1	0.317308	0.35443	0.390756	0.338235	0	0.485981	0	0	0	0
109708514	C	T	T	T	T	T	T	0.557692	0.412371	0.5	0.5	0.488889	0.673077	52	97	86	90	45	52	0	0	0.642857	0	0	0	0	0	0	0	0	0
71417892	T	A	A	A	A	A	A	0.633333	1	0.947368	1	1	0.78125	30	22	38	68	36	32	0	0.636364	0.457143	0	0.347826	0	0.73913	0	0	0	0	0.694444
29150700	C	A	A	A	A	A	A	0.580882	1	1	1	0.587302	0.5	136	86	90	153	63	42	0	0	0	0	0	0	0	0	0.378378	0.5	0.764706	0.538462
116194127	C	T	T	T	T	T	T	0.432432	0.555556	0.4	0.604651	0.530612	0.447368	37	27	40	43	49	38	0	0	0	0.486842	0	0	0	0	0	0	0	0
5187519	T	C	C	C,G	C	C	C	0.555556	0.5	1	1	1	1	9	18	8	7	17	4	0	0.555556	0	0	0	0	0.545455	0	0	0.916667	0.555556	0
42616760	G	C	C	C	C	C	C	1	0.2	1	1	0.833333	0.583333	5	25	2	9	6	12	1	0	0	0.777778	0.357143	0	0	0	0	0	0	0
82342597	A	G	G	G	G	G	G	1	1	1	1	1	1	27	15	18	22	17	16	0	1	0	0.833333	0.5	0	0.230769	0	0	0.454545	0	0.5
84977771	C	T	T	T	T	T	T	0.75	1	1	1	1	1	16	5	5	10	4	4	0	0.75	0	0.25	0	0.714286	0.555556	0	1	0	0	0
71319253	G	A	A	A	A	A	A	0.416667	0.636364	0.666667	0.692308	0.7	1	12	11	3	13	10	7	0.375	0	0	0	0	0	0	0.4	0	0.857143	0	0
87001301	T	C	C	C	C	C	C	0.96875	0.604651	0.421053	0.61194	0.342857	0.604167	64	43	19	67	35	48	0	0	0	0	0.6	0	0	0	0	0	0	0.48
42147743	G	A	A	A	A	A	A	0.857143	0.575758	1	0.956522	1	1	21	33	12	23	18	20	0	0.666667	0	0	0.5	0.75	1	0	0	0	0	0
35970197	C	T,A	T	T	T	T	T	0.875	1	0.875	0.9	1	0.818182	8	5	8	10	9	11	0	0	1	1	0	0	1	0	0	0	0	0
5862429	A	G	G	G	G	G	G	1	1	1	1	1	1	4	3	26	53	10	56	0	1	0.5	0.473684	0.484848	0.407407	0	0.666667	0	0	0	0
31170031	G	A	A	A	A	A	A	0.888889	0.7	1	1	1	1	18	10	9	8	4	5	0.666667	0.5	0.571429	0	0.384615	0.5	0	0	0	0	0	0.5
5858245	T	C	C	C	C	C	C	0.5	1	1	0.983871	1	1	12	10	22	62	15	34	0	0.8	0.305556	0.46875	0.4	0.461538	0	0.585366	0	0	0	0
89325327	G	T	T	T	T	T	T	1	1	1	1	1	0.461538	9	7	6	11	2	13	0	0	1	1	0	1	0	0	0	0	0	0
37470446	G	T	T	T	T	T	T	1	1	0.555556	0.636364	1	0.375	38	21	9	11	12	8	0	0.333333	0	0	0.5	0.272727	1	0	0	0	0	0
58440869	A	G	G	G	G	G	G	1	1	0.4	0.944444	0.2	1	15	5	5	18	10	8	0.375	0	0.363636	0.789474	0	0	0	0.555556	0	0	0	0
51193911	C	A	A	A	A	A	A	1	1	1	1	1	1	5	6	2	6	6	7	0	0	0.666667	0	0	1	0.5	0	0	1	0.375	0
34529678	T	G	G	G	G	G	G	0.5	1	1	1	1	1	6	2	2	2	4	4	0	0	1	0	0	0	0	0.375	0	1	0.666667	0
5858637	A	G	G	G	G	G	G	0.222222	1	1	0.988372	1	0.981481	18	16	24	86	34	54	0	1	0.325581	0.133333	0.43038	0.580645	0	0.264706	0	0	0	0
19386737	G	T	T	T	T	T	T	1	0.416667	1	1	1	1	43	24	17	21	26	8	0	1	1	0.315789	0.333333	0.3125	0	0	0	0	0	0
24834981	G	C,T	C,T	C	C,A	C	C,A	1	1	1	1	0.875	1	18	17	3	11	8	4	0	0	0.545455	0	0.875	0	0	0	1	0	0	1
40848127	T	C	C	C	C	C	C	1	1	1	1	1	0.636364	4	10	10	19	11	11	0	0	0	0	0	1	0	1	0	0	0.181818	1
45281465	T	C	C	C	C	C	C	0.375	0.6	0.444444	0.75	0.333333	0.25	8	10	9	12	6	12	0	0	0	0	0	0	0	0	0	0	0	0.3
6120101	C	T	T	T	T	T	T	0.5	1	1	1	1	1	4	3	6	10	2	15	0	0	0	0	0	0	0	1	0	0.714286	0.666667	0.666667
76653918	G	A	A	A	A	A	A	1	1	0.8	0.384615	1	0.818182	5	2	10	13	3	11	0	0	0	0	0	0	0.5	0	0	0.6	0.454545	1
89325228	A	C	C	C	C	C	C	1	0.875	1	1	1	0.571429	14	8	12	14	8	14	0	0	1	1	0	1	0	0	0	0	0	0
88833695	A	G	G	G	G	G	G	0.571429	0.625	1	1	1	1	7	8	2	8	5	4	0	0	0.75	0	0	1	0	1	0	0	0	0
116328911	T	C	C	C	A	C	C	1	0.333333	1	0.318182	0.411765	1	6	9	3	22	17	6	0	0	1	0	0.375	0	0	0	0	0	0	0.25
5857444	T	A	A	A	A	A	A	0.62069	1	0.98	0.977143	1	0.986014	29	19	100	175	28	143	0	1	0.313433	0.27027	0.338028	0.658537	0	0.54717	0	0	0	0
78645315	T	C	C	C	C	C	C	1	0.933333	1	1	1	1	27	15	4	12	28	21	0	0	0	0.5	0	0	0	1	0	1	1	0
81111385	T	C	C	C	C	C	C	0.416667	0.75	0.818182	0.666667	0.5	0.909091	24	12	11	12	4	22	0.1875	1	0	0	0.25	0	0	0	0.190476	0	0	0
36423386	G	T	T	T	T	T	T	1	1	1	1	0.875	0.428571	4	10	3	13	8	7	0	0	1	0.375	0	0	0	0	0	1	0	0.5
26508597	G	C	C	C	C	C	C	1	1	1	1	1	1	7	4	5	48	11	5	0	0	1	1	0.571429	1	0	0	0	0	0	0
77904972	G	A	A	A	A	A	A	1	1	1	1	1	1	21	16	3	10	14	3	0	0.333333	1	1	0	0	0.4	0.428571	0	0	0	0.411765
5861787	A	T	T	T	T	T	T	0.5	1	1	0.986301	1	1	18	14	40	73	32	86	0	0.916667	0.391608	0.323529	0.482143	0.423729	0	0.528571	0	0	0	0
6875930	G	C	C	C	C	C	C	0.615385	0.529412	0.428571	0.32	0.538462	1	13	17	14	25	13	35	0	0	0	0	0	0	0.285714	0	0	0	0	0.727273
47852389	A	G	G	G	G	G	G	0.714286	1	0.4	0.833333	1	1	7	15	5	6	2	2	0	0	0.529412	1	0	1	0	0	0	0	0	0
13431544	G	A	A	A	A	A	A	1	1	1	1	1	0.416667	19	6	7	22	6	12	0	1	0	0	0	0	0	1	1	0	0	0
89839969	C	A	A	A	A	A	A	0.5	0.5	1	1	1	0.75	4	6	10	10	7	4	0	0	0	0	1	1	0	0.333333	0	0	0	0
55937382	A	C	C	C	C	C	C	0.714286	1	0.75	0.285714	0.5	0.666667	7	2	4	7	4	6	0	0	0	0	0	0	0	0	0	0.5	0	1
15466657	A	G	G	G	G	G	G	1	1	0.666667	0.388889	1	0.444444	20	16	3	18	14	9	0	1	0	0	0.428571	0	0.666667	0	0	0	0	0
38712479	A	G	G	G	G	G	G	0.4	1	1	1	0.25	0.888889	5	16	20	24	12	18	1	0	0.5	0.636364	0	0	0	0	0	0	0	0
23252941	G	C	C	C	C	C	C	1	0.397516	0.450549	0.530726	0.5	0.479167	111	161	91	179	72	144	0	0.436364	0.521277	0	0	0	0	0	0	0	0	0
25791795	C	T	T	T	T	T	T	0.4	1	1	1	1	1	5	2	3	6	5	3	0	0	1	1	0	1	0	0	0	0	0	0
61476474	C	T	T	T	T	T	T	1	1	1	1	0.4	1	8	5	3	4	5	11	1	0	0	0	0	0	1	0	1	0	0	0
105380395	T	C	C	C	C	C	C	1	1	1	1	1	1	11	7	9	21	12	14	0	0	0	0	0	0.6	1	0	0	1	0	1
26508496	T	C	C	C	C	C	C	1	1	1	1	1	1	7	4	4	46	9	4	0	0	1	1	0.6	1	0	0	0	0	0	0
36977962	C	T	T	T	T	T	T	1	0.775	0.464286	0.515152	1	0.571429	41	40	28	33	62	21	0	0.6	0.444444	0	0.444444	0.4375	0	0	0	0	0	0
83285679	A	G	G	G	G	G	G	1	1	1	1	1	1	14	8	2	5	2	26	0.7	0	0	0.444444	0	0	0	0.875	0.428571	0	1	0.153846
6117169	A	G	G	G	G	G	G	1	1	0.777778	1	1	0.793103	1	2	9	22	4	29	0	0.6	1	0	0	0.727273	0	0.846154	0	0	0	0
5873045	T	A	A	A	A	A	A	1	1	0.833333	1	1	1	5	8	6	22	7	29	0	0	0	0	0.769231	1	0.666667	1	0	0	0	0
5859299	A	C	C	C	C	C	C	0.5	1	0.944444	0.994709	1	1	44	34	54	189	46	145	0	1	0.390625	0.295455	0.419355	0.4	0	0.53719	0	0	0	0
5856680	G	A	A	A	A	A	A	0.666667	1	1	1	1	0.972222	3	10	25	54	23	144	0	1	0.307692	0.405405	0.37963	0.586207	0	0.566038	0	0	0	0
113473391	G	A	A	A	A	A	A	1	1	1	0.434783	1	0.625	3	2	4	23	2	8	0	0	0	1	0	0	0	0	0.666667	0	1	0
5856857	G	A	A	A	A	A	A	0.394737	1	1	1	1	1	38	22	151	175	29	185	0	1	0.209877	0.423077	0.388235	0.405063	0	0.576577	0	0	0	0
11393346	T	G	G	G	G	G	G	0.791667	1	0.589744	0.697674	1	1	24	5	39	43	5	18	0.304348	0.666667	0	0	1	0	0.325	0.392857	0	0	0	0
5864295	G	T	T	T	T	T	T	0.181818	1	0.388889	0.2	1	1	11	8	18	10	15	55	0	0	0.230769	0.4	0	0	0	0.75	0	0	0	0
62304643	T	C	C	C	C	C	C	0.5625	1	1	1	1	0.25	16	14	13	32	13	20	0	0	0	0	0.666667	0.285714	0	0.5	0	0.75	0.222222	0
99908124	G	T	T	T	T	T	T	1	0.181818	0.727273	0.631579	0.555556	0.205882	4	11	11	19	9	34	0	0	0	0	0.5	0	0	0	0	0	0.416667	0
5857477	T	G	G	G	G	G	G	0.588235	1	0.99	0.980263	1	1	17	17	100	152	19	136	0	1	0.322581	0.444444	0.272727	0.578947	0	0.555556	0	0	0	0
20567938	C	T	T	T	T	T	T	0.363636	1	1	1	1	0.4	44	34	5	25	22	25	0.444444	0.461538	0	0	0.2	0	0	0.217391	0	0.47619	0	0.580645
6116462	A	T	T	T	T	T	T	0.625	1	0.444444	0.540541	1	0.740741	16	2	9	37	8	27	0	0	0.75	0	0	0.4	0	0.818182	0	0	0	0
265582	G	A	A	A	A	A	A	0.238095	0.6	0.3	0.6	1	0.5	21	15	10	5	10	12	0	0	0	0	0.428571	0	0	0.428571	0	0	0	0
55630616	G	A	A	A	A	A	T	1	1	1	0.75	1	0.428571	3	4	5	4	5	7	0	0	1	0	0	1	0	0	0	0	0.8	0
67212062	C	A	A	A	A	A	A	1	1	0.974026	0.985714	0.578947	1	49	76	77	70	38	39	0.42029	0.2	0	0.418182	0	0.974026	0.318182	0	0	0	0.313725	0.516484
6413347	A	G	G	G	G	G	G	1	1	1	0.944444	1	0.974359	9	13	7	108	42	39	0	0	0.875	0.666667	0	1	0	1	0	0	0	0
80361867	T	A	A	A	A	A	A	1	1	1	1	1	0.875	5	4	4	3	3	8	0	0.5	1	1	0	1	0	0	0	0	0	0
6117373	T	C	C	C	C	C	C	1	1	0.875	1	1	1	2	8	16	18	12	35	0	0	0.5	0	0	1	0	1	0	0	0	1
9470318	T	C	C	C	C	C	C	1	1	1	1	1	0.375	3	4	4	3	3	8	1	0	0	0	0	0	1	0	0	1	0	0
43187960	C	G	G	G	G	G	G	0.366667	0.380952	0.518519	0.545455	0.5	1	30	21	27	11	14	6	0.457143	0.481481	0	0	0	0	0	0	0	0	0	0
34784830	C	T	T	T	T	T	T	1	0.583333	0.714286	0.444444	0.465116	0.4	20	12	7	9	43	10	0	0	0	0	0	0	0	0	0	0.666667	0	0.567568
83014128	G	T	T	T	T	T	T	1	1	0.666667	0.538462	1	0.666667	16	3	3	13	3	3	0	1	0.5	0	0	0	0	0	0	0	1	0
20574512	A	G	G	G	G	G	G	0.368421	1	1	1	1	0.5	19	4	11	13	11	14	0	0.6	0	0	0	0	0	0.916667	0	0.357143	0	0.625
57200970	G	A	A	A	A	A	A	1	0.485207	0.56391	0.564885	0.555556	0.440252	176	169	133	262	108	159	0	0	0	0	0	0	0	0	0.388889	0.397436	0.454545	0
76528815	T	C	C	C	C	C	C	1	1	1	1	1	1	4	4	3	8	2	3	0	0	0.8	1	0	0	0	0	1	0	0	0.833333
21247837	C	T	T	T	T	T	T	1	1	1	1	0.5	1	7	6	16	15	10	26	0	0.8	0	0	0	0	1	0.6	0	0.4	0	0.333333
77036613	A	G	G	G,T	G	G	G	1	0.947368	1	0.982143	0.962963	1	50	38	28	56	54	19	0	0	0	0	0	1	0.928571	0	0.6	0	0	1
82987793	A	G	G	G	G	G	G	0.466667	0.272727	0.73913	0.727273	0.555556	1	30	11	23	22	18	14	0	1	0	0	0	0	0	0	0.4	0	0	0
118443648	T	C	C	C	C	C	C	1	0.625	1	1	0.285714	0.45	24	8	5	15	14	20	0	1	0	0	0	1	0	0	0	0	0	0
30557224	T	A	A	A	A	A	A	0.821429	0.2	0.611111	0.764706	0.444444	0.571429	28	30	18	17	18	14	0	0	0	0	0	0	0	0.5	0	0.555556	0	0
157903	G	A	A	A	A	A	A	0.307692	0.769231	0.583333	0.75	1	0.428571	13	13	12	12	6	7	0	0	0	0.181818	0	0	0	0.3	0	0	1	0
55610792	A	G	G	G	G	G,C	G	0.6	1	0.4375	0.666667	1	0.4	10	7	16	3	8	5	0	0	0	0	0	0	0	1	0	0	0	0.75
23252933	C	T	T	T	T	T	T	1	0.396341	0.493976	0.522727	0.434783	0.468966	123	164	83	176	69	145	0	0.448276	0.515464	0	0	0	0	0	0	0	0	0
32458359	C	T	T	T	T	T	T	0.5	0.997013	0.666667	0.967213	0.285714	0.8125	4	7701	6	61	14	16	0.3125	0	0	0.3125	0	0.571429	0	0	0	0.4	0	0.282051
5854135	T	G	G	G	G	G	G	1	1	1	1	1	0.972973	6	10	17	28	9	37	0	1	0.588235	0.5	0.6	0	0	0.941176	0	0	0	0
28123360	A	G	G	G	G	G	G	1	1	1	1	1	1	9	6	5	3	3	4	0	0	1	0	0	0	0.857143	0.8	0	0	1	0
5904675	G	A	A	A	A	A	A	1	1	0.375	0.733333	1	0.733333	2	2	8	15	5	30	0	1	0.75	0	0.75	0	0	0	0	0	0	0
49492920	A	G	G	G	G	G	G	0.571429	0.875	0.2	0.259259	0.727273	0.333333	7	8	10	27	11	9	0.625	0	0	0	0	0	0	0	0	0	0	0
19337335	T	C	C	C	C	C	C	0.567568	0.366667	0.333333	0.2	0.52	0.352941	37	30	12	25	25	17	0	0	0	0	0	0	0	0	0	0	0	0
46932522	T	C	C	C	C	C	C	1	1	1	1	1	1	3	11	4	6	2	9	0	0	0	0.875	0	0.666667	0.833333	0	1	0	0.285714	0
5861789	G	T	T	T	T	T	T	0.5	1	0.933333	1	1	1	20	15	45	71	26	83	0	0.911765	0.410959	0.333333	0.488372	0.42623	0	0.524476	0	0	0	0
27063048	G	A	A	A	A	A	A	0.255814	1	1	1	0.222222	1	43	13	6	17	9	15	0	0	1	0	0.5	0.642857	0	0	0	0	0	0
112302416	A	G	G	G	G	G	G	0.555556	1	0.571429	0.6875	0.714286	0.322581	9	4	7	16	7	31	0	0	0	0	0.25	0	0	0	0	0	0.666667	0.6
29150637	A	C	C	C	C	C	C	0.528169	0.984848	0.989011	0.992188	0.45614	0.479167	142	66	91	128	57	48	0	0	0	0	0	0	0	0	0.307692	0.5	0.8	0.487805
66774459	A	G	G	G	G	G	G	0.380952	1	1	1	0.285714	0.666667	21	13	12	11	14	6	0	1	0	0.5	0	0	0	0	0	0	0	0.5
27677370	A	T	T	T	T,C	T	T	1	1	1	1	0.777778	0.555556	9	1	9	12	9	9	1	0	0	0	0	0	0	0	1	0	1	0
31694933	G	A	A	A,T	A	A	A	0.666667	1	1	1	1	0.666667	3	6	8	13	3	6	0	0	0	1	0	0	0	1	0	0	1	0
13877804	G	C	C	C	C	C	C	1	1	1	1	1	1	10	4	3	5	2	4	0	1	1	1	0	0	0	0	0	0	0.666667	0
67798027	G	A	A	A	A	A	A	1	1	1	1	1	1	3	10	5	5	3	8	0	0	0.666667	1	0	1	0	0	1	0	0	0
7696330	C	T	T	T	T	T	T	1	1	1	1	1	1	3	3	5	11	2	5	0.666667	0	1	1	0	0	0	1	0	0	0	0
19477827	G	T	T	T	T	T	T	1	1	1	1	1	1	5	11	2	14	2	20	1	0	0	1	0	0.666667	0	0	1	0	0	0
9418182	T	C	C	C	C	C	C	1	1	1	1	1	0.5	4	4	3	6	2	4	0	1	1	0.666667	0	0	0.5	0	0	0	0	0
174931	T	C	C	C	C	C	C	1	1	1	1	1	1	4	2	2	4	2	3	0	0	1	1	0	0	0	0.666667	0	0	1	0
18416454	G	T	T	T	T	T	T	1	1	1	1	0.333333	1	11	11	13	9	12	17	0	1	1	0	0	0	0	1	0	0	0	0
65528696	C	A	A	A	A	A	A	1	1	1	1	0.75	1	6	2	3	2	4	3	0	0	1	0.75	0	0	0.5	0	0	0.5	0	0.666667
61476476	T	C	C	C	C	C	C	1	1	1	1	0.333333	1	7	5	3	4	6	12	1	0	0	0	0	0	1	0	1	0	0	0
62341158	G	A	A	A	A	A	A	1	1	1	1	1	1	2	4	8	15	2	4	0	0	0	0	0	1	0	1	0	0	1	0.666667
26508550	C	A	A	A	A	A	A	1	1	1	1	1	1	8	4	5	51	11	6	0	0	1	1	0.666667	1	0	0	0	0	0	0
5848558	T	C	C	C	C	C	C	1	1	1	1	1	1	2	6	10	14	3	68	0	0	0	1	1	1	0	0	0	0	0	0.666667
14571400	C	A	A	A	A	A	A	1	0.5	1	1	1	0.833333	10	12	4	7	10	6	0	0	0	0	1	1	0	0	0	0	0	1
28333465	C	T	T	T	T	T	T	0.923611	0.981375	0.992063	0.994681	0.987879	0.639506	288	698	126	188	330	405	0.318182	0.923664	0	0.470588	0.272727	0.388889	0	0	0	0.4375	0.375	0
106296642	G	A	A	A	A	A	A	1	0.5	0.555556	0.617647	0.607143	0.75	42	22	9	34	28	24	0	0.576923	0.517241	0.606061	0	0	0	0	0	0	0	0
36986452	A	G	G	G	G	G	G	1	0.565476	0.602151	0.694268	1	0.785714	170	168	93	157	239	28	0	0.572222	0.630901	0	0.512195	0.604651	0	0	0	0	0	0
932502	T	C	C	C	C	C	C	0.875	0.444444	1	1	0.592593	1	32	9	15	20	27	25	0	0.357143	0.904762	0	0	0.625	0.7	0	0	0	0	0
15467607	G	A	A	A	A	A	A	1	0.925926	0.5	0.52381	1	0.666667	32	27	16	21	17	9	0	1	0	0	0	0	0	0	0	0.625	0	0.666667
6117150	C	T	T	T	T	T	T	1	1	0.916667	1	1	0.740741	2	2	12	24	8	27	0	0.6	1	0	0	0.8	0	0.933333	0	0	0	0
7403093	A	G	G	G	G	G	G	0.545455	1	0.625	0.75	1	1	11	2	8	12	2	8	0	0	0	1	1	0	0	0	0	0	0.6	0
143194392	A	G	G	G	G	G	G	0.8	0.470588	0.75	0.5	1	0.444444	5	17	16	12	2	9	0	0	0	0.514286	0	0	0	0	0.916667	0	0	0.214286
87475295	G	A	A	A	A	A	A	1	0.666667	1	1	1	0.615385	37	6	16	30	25	39	0	0	0.380952	0.555556	1	0.6	0	0	0	0	0	0.428571
58685648	G	A	A	A	A	A	A	0.272727	1	1	1	0.3	1	22	18	7	24	10	21	0	0.4	0	0	0	0	0	0.857143	0	1	0	0
82342746	A	C	C	C	C	C	C	1	1	0.964286	1	1	1	18	19	28	24	3	13	0	1	0	0.857143	0.75	0	0	0	0.375	0.666667	0	0
68275158	T	C	C	C	C	C	C	0.363636	0.333333	0.666667	0.75	0.5	0.5	11	6	9	8	4	6	0	0.4	0	0	0.4	0	0	0	0	0	0	0
71420204	G	A	A	A	A	A	A	1	1	1	1	1	0.428571	66	77	31	47	32	42	0	0.488889	1	0.560976	0.52381	0.541667	0	0	0	0	0	0
19064125	T	C	C	C	C	C	C	0.592593	0.481481	0.5	0.457143	0.446429	0.619048	54	27	26	35	56	21	0	0.368421	0.416667	0	0	0	0	0	0	0	0	0
6112294	T	G	G	G	G	G	G	1	1	1	1	1	0.976744	5	13	8	26	5	43	0	0	0	0	0.666667	0	1	1	0	0	0	1
5862076	C	A	A	A	A	A	A	0.75	1	0.973684	1	1	0.99	12	3	38	87	24	100	0	1	0.583333	0.333333	0.439394	0.472727	0	0.575758	0	0	0	0
57896623	G	A	A	A	A	A	A	0.172414	0.666667	0.555556	0.233333	1	0.68	29	18	18	30	14	25	0	1	0	0	0	0	0	0	0	0	0	0
1068716	A	G	G	G	G	G	G	1	0.416667	1	1	0.393939	0.5	39	48	16	55	33	26	0.416667	1	0	0	0	0	0	0.586207	0	0	0	0
62304518	C	T	T	T,A	T	T	T	0.75	1	1	1	1	0.344828	4	7	8	20	28	29	0.6	0	0	0	0	0.333333	0	0.4	1	0	0.454545	0
5857565	G	A	A	A	A	A	A	0.6	1	1	1	0.857143	0.533333	15	6	52	97	7	105	0	0	0.727273	0.444444	0.583333	0.5	0	0.428571	0	0	0	0
7105315	G	A	A	A	A	A	A	1	0.909091	1	1	1	1	5	11	7	11	2	9	0	0	0.769231	1	0	0	0	0	0	0.833333	0.666667	0.333333
25846446	C	G	G	G,T	G	G	G	0.478261	1	1	1	0.411765	1	23	2	12	7	17	3	0	0	0	1	0	1	0	0.285714	0	0.3	0	0
71250728	G	A	A	A	A	A	A	0.396552	1	0.636364	0.540541	0.5625	0.5	58	25	11	37	32	18	0	0	0	0	0	0	0	0.4375	0	0.541667	0.352941	0
65528476	C	G	G	G	G	G	G	1	1	1	1	1	0.714286	6	10	10	6	8	7	0	0	1	0.8	0.75	0.5	0	0	0	0	0	0.363636
86766800	G	A	A	A	A	A	A	0.558824	1	1	0.26087	1	0.681818	34	37	13	23	20	22	0	0	0	0	0	0	0	0.5	0.5	0.772727	0.428571	0
105102177	C	T	T	T	T	T	T	1	0.995074	0.993506	1	1	1	190	203	154	155	88	167	0.476038	0	0.547619	0	0	0.397059	0.51004	0	0.293578	0.495775	0.467128	0.502825
26747637	G	A	A	A	A	A	A	0.425497	0.476303	1	0.993443	1	0.477099	604	422	158	305	296	262	0	0.465625	0.439583	0	0.415842	0.401361	0	0	0	0	0.351974	0
5861747	G	A	A	A	A	A	A	0.533333	1	1	1	1	1	15	17	52	88	36	88	0	0.948718	0.38	0.362319	0.491979	0.52381	0	0.529032	0	0	0	0
15466653	T	A	A	A	A	A	A	1	0.928571	0.666667	0.352941	1	0.444444	19	14	3	17	13	9	0	1	0	0	0.428571	0	0.666667	0	0	0	0	0
16557276	A	G	G	G	G	G	G	0.421053	0.375	1	1	1	1	19	8	2	6	5	3	0	0	0.5	1	1	0	0	0	0	0	0	0
6042053	C	G	G	G	G	G	G	0.75	1	1	1	1	1	8	6	22	99	37	143	0	1	0.388889	0.642857	0.5	0.736842	0	0.1875	0	0	0	0
5860742	C	G	G	G	G	G	G	0.469388	1	1	1	1	0.991968	49	29	162	316	44	249	0	0.925	0.455224	0.392308	0.43002	0.453237	0	0.512	0	0	0	0
57004083	T	C	C	C	C	C	C	0.705882	0.6	0.75	0.8	0.909091	0.647059	17	10	4	20	11	17	0	0	0.625	0	0	0	0	0.5	0	1	0	0
37802196	T	C	C	C	C	C	C	1	1	1	1	1	1	13	15	3	17	8	1	0	0	1	1	0	1	0	0	0	0	0.714286	0
119432750	G	C	C	C	C	C	C	1	1	1	1	1	1	4	2	4	4	7	11	0	1	1	0	0	0	0	0	0	1	0	0.714286
57746758	T	C	C	C	C	C	C	0.517241	1	1	1	1	0.756098	29	8	23	67	43	41	0	1	0	0	0	0.588235	1	0	0	0	0	0.4
90747959	T	G	G	G	G	G	G	1	1	1	1	0.1875	0.600962	3	15	6	16	32	208	0	0.980392	1	0	0	0.52381	0	0	0	0	0	0
22275136	T	A	A	A	A	A	A	1	1	0.971429	1	0.478261	0.647059	45	19	35	25	23	17	0	0	0	0.4	0.4	0	0	0.285714	0.928571	0.315789	0	0.482759
66969658	T	C	C	C	C	C	C	0.55814	1	0.607843	0.565217	0.673077	0.544304	43	56	102	138	52	79	0.583333	0	0.583333	0	0	0	0	0	0	0	0	0.5
18300411	A	T	T	T	T	T	T	0.357143	1	0.666667	1	0.555556	0.571429	14	3	3	3	9	7	0	0.333333	0	0.5	0.2	0	0.166667	0	0.25	0.222222	0.2	0
90748291	T	C	C	C	C	C	C	1	1	1	1	0.28	0.585106	10	6	10	34	25	188	0	1	1	0	0	0.588235	0	0	0	0	0	0
1119386	G	C	C	C	C	C	C	1	1	1	1	1	0.5	45	14	5	28	23	20	0.625	1	0.35	0	0.75	0.5	0	0	0	0	0	0
26660834	A	G	G	G	G	G	G	1	1	1	1	1	1	6	5	4	3	9	15	1	0	0.333333	0.5	0	0	1	0	0	0.375	0.518519	0
83823444	C	A	A	A	A	A	A	1	0.8125	0.375	0.555556	0.923077	0.818182	11	16	8	9	13	11	0	0.545455	0.666667	1	0	0	0	0	0	0	0	0
92616355	A	C	C	C	C	C	C	1	0.4375	1	1	1	1	2	16	3	3	5	6	0	0	0.888889	0.5	1	0	0	0	0	0	0	0.777778
1971706	G	C	C	C	C	C	C	0.692308	0.541667	0.5	0.785714	1	1	26	24	12	28	4	27	0	0	0.5	0.416667	0	0.666667	0	0	0.666667	0	0	0
42315610	T	C	C	C	C	C	C	0.774194	0.37931	1	1	0.666667	0.434783	31	29	22	24	12	23	0	1	0	0.34375	0.642857	0	0	0	0	0	0	0
26534244	C	T	T	T	T	T	T	1	1	1	0.5	0.571429	0.833333	3	5	2	8	7	6	0	0	0.4	0.571429	0	0	0	0.666667	0	1	0	0
2839979	T	C	C	C,G,A	C	C	C	0.818182	1	1	1	1	1	22	4	11	4	5	14	1	0	1	1	0.555556	0	0	0	0	0	0	0
5859850	C	T	T	T	T	T	T	0.451923	0.982143	1	0.989101	1	1	104	56	310	367	63	265	0	1	0.424682	0.336735	0.380952	0.505814	0	0.513514	0	0	0	0
15467416	A	G	G	G	G	G	G	1	1	0.28	0.7	1	1	23	29	25	20	22	15	0	1	0	0	0.5	0	0	0	0	0.222222	0	1
5857325	A	T	T	T	T	T	T	0.545455	1	0.987342	0.979757	1	0.990741	44	37	158	247	48	216	0	1	0.393103	0.352201	0.397619	0.46087	0	0.642241	0	0	0	0
138752239	T	C	C	C	C	C	C	1	0.761905	0.52	0.709677	0.761905	0.571429	31	21	25	31	21	28	0.333333	1	0	0	0	0	0	0	0	0	0.444444	0.290323
78450014	C	A	A	A	A	A	A	0.55102	0.953125	0.894737	0.952381	0.512821	0.333333	49	64	19	21	39	12	0.538462	0	0	0	0.555556	0	0	0	0	0.444444	0.407407	0
72189866	T	C	C	C	C	C	C	1	1	1	1	1	1	5	3	3	11	11	7	1	0	0	0	0	1	0	0	0	0.75	0	1
57409333	A	G	G	G	G	G	G	1	1	1	1	1	1	2	6	3	11	5	3	0	0	0	1	0	1	0	0	0	1	0	0.75
73415326	A	G	G	G	G	G	G	1	1	1	1	1	1	17	7	2	5	9	2	0	1	0	0	0	0	0	1	0	0.75	1	0
27600980	A	G	G,T	G	G	G	G	1	1	1	1	1	1	6	8	15	18	4	2	0	0	0	1	0	0	1	0	0	0.75	0	1
76663609	T	A	A	A	A	A	A	1	0.963636	0.678571	0.591549	1	0.586957	60	55	28	71	75	46	0	0	0	0.44	0	0	0.344828	0	0	0.325	0.461538	1
89504342	T	C	C	C	C	C	C	1	1	1	1	1	0.421053	99	66	118	150	40	57	0.388889	0	0	0	0.5	0	0.261905	0.639344	0.478261	0.138889	0.393939	0.372093
5854100	G	T	T	T	T	T	T	0.8	1	0.866667	1	1	0.977273	5	8	15	23	11	44	0	1	0.347826	0.473684	0.416667	0.6	0	0.56	0	0	0	0
22672976	T	A	A	A	A	A	A	0.59322	0.714286	1	1	0.638298	0.612903	59	14	6	24	47	31	0	0.545455	0	0.545455	0	0.222222	1	0	0	0	0	0
6111841	A	C	C	C	C	C	C	0.666667	0.4	1	0.944444	0.615385	0.285714	6	5	8	36	13	35	0	1	0	0	0	0	0	0.666667	0	0	0	0
26747465	G	A	A	A	A	A	A	0.585185	0.56314	1	0.9967	1	0.640884	405	293	194	303	265	181	0	0.605016	0.518447	0	0.495575	0.441718	0	0	0	0	0.480769	0
36528160	A	G	G	G	G	G	G	0.524194	1	1	1	1	0.44186	124	84	45	68	90	43	0.448276	0.394737	0.456311	0.929577	0	0	0	0	0	0	0.494845	0
43015212	C	T	T	T	T	T	T	1	1	1	1	1	0.75	11	10	4	11	16	8	0	0	0.285714	1	0	0	1	0	0	0	0.222222	1
57640521	G	A	A	A	A	A	A	0.373333	0.408	0.417722	0.444444	1	0.595745	75	125	79	99	94	47	0	1	0	0	0	0	0	0	0	0	0	0
116341197	C	A	A	A	A	A	A	1	1	0.777778	0.458333	1	1	2	3	9	24	7	8	0	1	0	0	1	0	0	0	0	0	0	1
43256995	T	G	G	G	G	G	G	0.428571	0.8	0.733333	0.304348	0.416667	0.451613	28	15	15	23	12	31	0.5	0.4	0	0	0	0	0	0	0	0	0	0
7773271	C	T	T	T	T	T	T	0.454545	0.5	1	1	0.5	0.6	22	42	31	20	22	25	0	1	0	0	0.482759	0	0	0	0	0.337838	0	0
84974274	C	T	T	T	T	T	T	1	1	1	1	0.857143	1	8	9	19	12	7	14	0	0	0.555556	0.409091	0.615385	0.4	0.444444	0	1	0.2	0	0
5859174	G	A	A	A	A	A	A	0.384615	1	1	1	1	1	39	19	77	118	43	191	0	1	0.383929	0.468354	0.438735	0.325581	0	0.538462	0	0	0	0
4824258	G	A	A	A	A	A	A	0.296296	0.666667	1	0.714286	1	1	27	12	2	14	10	40	0	0	0	0	0.666667	0.8	0	0	0.8	0	0.181818	0
42570369	C	T	T	T	T	T	T	1	0.72	0.787879	0.319149	1	1	30	25	33	47	28	81	0.375	0.818182	0.375	0	0.409091	0.625	0	0	0	0	0	0
50614204	G	A	A	A	A	A	A	0.427184	0.287234	0.309524	0.324675	1	0.456522	206	94	42	77	57	46	0	0	0	0	0	0	0	0.357143	0	0	0.22449	0
6038232	A	T	T	T	T	T	T	0.474803	0.723382	0.872124	0.861888	0.662361	0.442088	4564	2921	7085	6082	2245	3065	0	0.892487	0	0.199358	0	0.28559	0	0.437207	0	0	0	0
82887074	A	C	C	C	C	C	C	1	1	0.294118	0.7	1	0.727273	4	9	17	10	2	11	1	0	0	0	0.5	0	0	0	0	0	1	0
5854856	C	T	T	T	T	T	T	0.833333	1	1	1	1	1	6	22	37	66	17	82	0	1	0.586207	0.342857	0.452381	0.565217	0	0.666667	0	0	0	0
71250876	A	G	G	G	G	G	G	0.545455	0.977778	0.625	0.52	0.333333	0.552632	55	45	16	50	21	38	0	0	0	0	0	0	0	0.516129	0	0.447368	0.371429	0
3274103	G	A	A	A	A	A	A	1	0.470588	1	1	0.714286	1	68	34	14	35	21	32	0	1	0	0	0	0	0.172414	0.357143	0.5	0	0.642857	0.294118
6124514	T	A	A	A	A	A	A	0.592593	0.923077	0.818182	0.680556	1	0.914286	27	13	44	72	5	35	0	1	0	0	0	0	0	1	0	0	0.5	0.210526
25336575	C	T	T	T	T	T	T	1	1	1	0.966667	1	0.918919	38	29	8	60	25	37	0.4	0	1	0.470588	0	0.6	0.363636	0.5	0	0	0	0.333333
6724742	A	C	C	C	C	C	C	0.25	1	1	1	0.612903	0.354167	28	19	22	62	31	48	0	0	0.52	0	1	0.48	0	0	0	0	0	0
86598427	C	T	T	T	T	T	T	0.8	1	1	1	0.666667	1	10	11	4	8	3	3	0.75	0	1	0.5	0	0	1	0	0	0	0	0
21491651	G	T	T	T	T	T	T	0.714286	1	0.666667	0.363636	0.625	0.35	7	3	6	11	8	20	0	0	0.777778	0	0	0	0	0.285714	0	0.285714	0	0.153846
5862171	C	A	A	A	A	A	A	0.6	1	0.965517	1	1	1	15	18	29	55	26	101	0	1	0.476923	0.454545	0.333333	0.459459	0	0.625	0	0	0	0
19386773	G	C	C	C	C	C	C	1	0.34375	1	1	1	1	45	32	21	21	21	6	0	1	1	0.294118	0.357143	0.478261	0	0	0	0	0	0
60126933	T	C	C	C	C	C	C	0.733333	1	0.866667	0.458333	1	1	15	9	30	24	6	7	0	1	0.923077	0	0	0	0	0.421053	0	0	0	0.5
84974302	G	A	A	A	A	A	A	1	1	1	1	0.7	1	8	13	16	17	10	13	0	0	0.555556	0.391304	0.571429	0.5	0.285714	0	1	0.181818	0	0
40856459	T	C	C	C	C	C	C	1	1	1	1	1	1	2	6	17	18	10	24	0.857143	0	0	0	0	0	0.3	1	0.631579	0	0	1
5860353	A	C	C	C	C	C	C	0.4375	0.621622	0.981818	0.972696	0.74026	0.665094	48	37	165	293	77	212	0	1	0.489627	0.181818	0	0	0	0.537634	0	0	0	0
933462	T	C	C	C	C	C	C	1	1	1	1	1	1	2	2	9	13	6	7	0	0	0	0	1	0.333333	0	0.857143	0	0	0.6	1
82886725	C	T	T	T	T	T	T	1	1	1	1	1	1	10	7	8	9	2	4	1	0	1	0.8	1	0	0	0	0	0	0	0
98100333	A	G	G	G	G	G	G	1	1	1	1	1	1	2	4	13	40	6	7	1	0	1	0.8	0	0	1	0	0	0	0	0
6087763	G	A	A	A	A	A	A	1	1	1	1	1	1	13	12	3	8	4	9	0	0	0	0	0	0	0	1	0	1	0.8	1
5872931	G	A	A	A	A	A	A	0.6	0.666667	0.333333	0.631579	0.571429	0.52	10	3	9	19	7	25	0	0	0	0	0.625	0	0	0.5	0	0	0	0
15707208	G	A	A	A	A	A	A	0.606061	0.647059	0.75	0.681818	0.1875	0.634146	33	17	12	22	16	82	0.181818	0	0	0	0	0	0.583333	0	0	0	0.333333	0.214286
10632142	G	A	A	A	A	A	A	1	0.857143	1	1	1	1	11	7	8	9	7	6	1	0	0	0.375	0	0.75	0.538462	0	0	1	0	0
58878835	T	G	G	G	G	G	G	1	0.333333	0.583333	0.315789	0.625	1	3	12	12	19	8	5	1	0	0	0	0	0	0	0.666667	0	0	0	0
11272558	G	A	A	A	A	A	A	1	1	1	1	1	1	7	7	2	12	11	33	0	0	1	0.586207	0	0.461538	0.428571	0.333333	0	1	0	0
5861088	T	C	C	C	C	C	C	0.521277	0.839506	0.984576	0.993878	0.671053	0.570642	94	81	389	490	76	545	0	0.97561	0.523179	0.273684	0	0	0	0.620321	0	0	0	0
95418669	C	A	A	A	A	A	A	0.56	1	1	1	1	1	25	20	21	18	8	17	0	1	0	0	0	0	0	1	0	0	1	0.375
69414762	G	A	A	A	A	A	A	1	1	1	1	0.571429	1	2	4	4	2	7	6	0	0	0.571429	0.4	0	0	1	0.666667	0	0.75	0	0
50324323	A	G	G	G	G	G	G	0.448276	0.947368	0.8125	0.475	0.46875	1	29	19	16	40	32	4	0	1	0.357143	0.15	0	0	0.461538	0	0	0	0	0
26747488	T	C	C	C	C	C	C	0.520295	0.531863	1	0.996997	1	0.641921	542	408	230	333	356	229	0	0.592233	0.515695	0	0.492718	0.425258	0	0	0	0	0.483871	0
36438791	G	A	A	A	A	A	A	1	1	1	0.555556	0.5	1	3	3	5	9	4	4	0	0	1	0	1	0	0	0	0	0	0	0.875
16807112	A	G	G	G	G	G	G	0.857143	0.875	1	1	0.666667	1	7	8	2	3	3	4	0	0	0	0	0	0	0.75	0	1	0.666667	0.230769	0.571429
82541139	A	C	C	C	C	C	C	0.326531	1	0.969697	0.944444	0.375	0.972222	49	20	33	36	40	36	0.742857	0	0	0	0.666667	1	0	0	0	0	0	0
2695225	G	A	A	A,T	A	A	A	1	0.357143	1	1	1	1	47	14	4	37	26	22	0	0.384615	0.5	0.590909	0.166667	0.421053	0.545455	0	0	0.571429	0	0
25814951	A	G	G	G	G	G	G	0.25	1	1	0.428571	1	0.384615	32	6	8	14	16	13	0	1	0.388889	0.5	0	0	0	0	0	0	0	0
60611195	T	C	C	C	C	C	C	0.609137	1	0.916667	1	0.409091	1	197	71	24	117	88	62	0.47619	0	0.4	0.4	0.486486	0	0	0	0	0	0	1
9649681	G	A	A	A	A	A	A	1	0.592593	0.652174	0.704545	1	1	38	27	23	44	17	30	0	0	0	1	0.5	0.777778	0	0	0	0.5	0	0
39317594	C	G	G	G	G	G	G	0.526316	0.6	0.6	0.727273	0.5	0.5	19	10	5	11	8	4	0	0	0	0	0	0	1	0	0	0.285714	0	0
35141257	C	A	A	A	A	A	A	1	0.5	1	1	1	0.7	5	4	7	13	4	10	1	0	0.75	0	0	0	1	0	0	0	0	0.285714
6134334	T	C	C	C	C	C	C	0.75	1	1	0.968254	1	1	16	15	20	63	18	66	0	0	0	0	0	0	0	1	0	1	0.789474	0.766667
26614423	C	T	T	T	T	T	T	0.727273	0.428571	1	1	0.25	0.727273	11	14	13	4	8	11	0	0.470588	0	0.551724	0.454545	0.5	0	0	0	0	0	0
11049117	C	T	T	T	T	T	T	0.681818	0.307692	0.617647	0.348485	0.260274	0.606061	66	52	34	66	73	66	0	0.666667	0	0	0	0	0	0	0	0	0	0
9833699	C	T	T	T	T	T	T	1	0.933333	1	1	1	0.529412	9	15	7	17	8	17	0	0.307692	1	0	0	1	0	1	0	0	0	0
16336493	G	A	A	A	A	A	A	0.190851	0.990431	0.325145	0.295378	0.994845	0.343982	1399	418	692	887	582	1753	0	0	0	0	0	0	0	0.991061	0	0	0	0
5859901	T	G	G	G	G	G	G	0.563492	0.986301	0.988426	0.984405	1	0.997573	126	73	432	513	83	412	0	0.981308	0.418301	0.463415	0.419322	0.545455	0	0.543417	0	0	0	0
57004101	T	C	C	C	C	C	C	0.473684	0.666667	0.8	0.958333	1	1	19	15	5	24	11	15	0	0	0.75	0	0	0	0	1	0	1	0	0
6128683	T	C	C	C	C	C	C	0.823529	1	0.823529	1	1	1	17	12	17	19	8	16	0	1	0	0	0	0	0	1	0	0	0.5	1
10813221	T	A	A	A	A	A	A	1	1	1	1	1	1	3	3	3	9	2	4	1	0	0	1	0	0	0	0	1	0	0	0.857143
26747595	T	C	C	C	C	C	C	0.450512	0.490196	0.994253	0.996622	1	0.488055	586	408	174	296	340	293	0	0.511561	0.498062	0	0.462295	0.4	0	0	0	0	0.412121	0
30103960	G	A	A	A	A	A	A	1	1	1	1	1	1	19	4	8	12	5	11	0	0	0	0	0.416667	0	0	0.333333	1	0.555556	1	0.5625
47793332	G	A	A	A	A	A	T	0.571429	0.4	0.258065	0.666667	0.461538	0.423077	7	10	31	6	13	26	0	0	0	0	0	0	0.25	0	0.206897	0	0	0.192308
25804742	A	G	G	G	G	G	G	0.463415	1	0.75	0.638298	1	0.909091	41	51	20	47	15	11	0	0.695652	0.545455	0.772727	0	0.619048	0	0	0	0	0	0
26729693	T	C	C	C	C	C	C	1	0.571429	1	0.555556	1	1	2	7	2	9	3	3	0	0	1	0	0	0	0	0	0	0	1	1
16249125	A	G	G	G	G	G	G	1	1	1	1	1	1	4	6	2	18	7	8	0	0	0.75	1	0.75	0	0.375	0	0	0	0	1
6039148	C	A	A	A,T	A	A	A,T	1	0.666667	0.923077	0.866667	1	1	4	3	13	15	3	10	0	0	0.5	1	0.833333	1	0	0	0	0	0	0
4824592	A	G	G	G	G	G	G	0.416667	0.4	0.64	0.515152	1	1	24	5	25	33	11	66	0	0	0.666667	0	0.363636	0	0	0	0.285714	0	0.533333	0
45696521	T	C	C	C	C	C	C	0.552381	0.611111	0.487179	0.512195	1	0.606061	105	36	39	82	67	66	0.484848	0.571429	0.59375	0	0	0	0	0	0	0	0	0
115437227	C	T	T	T	T	T	T	0.368421	0.2	1	1	1	0.521739	19	15	16	33	15	23	0.333333	0	0.478261	0	0	0	0	0.6	0.16129	0	0.4	0
62331128	G	C	C	C	C	C	C	1	1	1	1	0.666667	1	8	5	13	26	3	5	0	0	0	0	0.8	1	0	0	1	0	0.75	0
78829835	C	T	T	T	T	T	T	1	1	0.333333	0.384615	0.375	0.466667	28	8	9	13	16	15	0	0	0.5	0	0.5	0	0	0	0	0.444444	0	0
59489986	A	C	C	C	C	C	C	0.181818	1	0.526316	0.6	0.555556	0.75	11	5	19	10	9	12	0	0.5	0	0	0	1	0	0	0	0	0	0
290283	G	C	C	C	C	C	A	1	0.422535	1	1	1	0.404762	90	71	27	76	64	42	0.556391	0	0	0.638095	1	0.52381	0	0	0	0	0	0
71112083	C	T	T	T	T	T	T	0.333333	0.318182	0.309524	0.515152	0.307692	0.324324	24	22	42	33	13	148	0	0	0	0	0	0	0	0	0	0	0	0
98100521	G	T	T	T	T	T	T	1	1	1	1	1	1	2	3	61	72	9	6	0.892857	0	1	1	1	0	0	0	0	0	0	0
26747553	C	T	T	T	T	T	T	0.5026	0.53598	1	0.993355	0.994382	0.586081	577	403	196	301	356	273	0	0.565934	0.533795	0	0.509589	0.41411	0	0	0	0	0.481994	0
138751676	T	C	C	C	C	C	C	1	0.709677	0.7	0.380952	0.375	0.545455	52	31	10	42	16	33	0	1	0	0	0	0	0	0	0	0	0.272727	0.333333
15469261	G	A	A	A	A	A	A	1	1	0.491803	0.631579	1	0.666667	58	52	61	57	24	60	0	1	0	0	0.444444	0	0.5625	0	0	0.333333	0	0.346154
40848125	C	T	T	T	T	T	T	1	1	1	1	1	1	4	10	10	19	11	7	0	0	0	0	0.5	1	0	1	0.166667	0	0.230769	1
5860302	T	C	C	C	C	C	C	0.513514	1	0.99422	0.983165	0.975309	1	37	48	173	297	81	231	0	1	0.478673	0.304688	0.408854	0.61165	0	0.56	0	0	0	0
16249923	G	T,A	A	A	A	A	A	1	0.632353	0.446809	0.580952	0.65625	0.536585	219	136	188	105	96	82	0	0	0	0.625	0	0.569892	0	0.55814	0	0	0	0
86768306	G	A	A	A	A	A	A	0.521614	0.988539	0.581818	0.494915	1	0.548544	347	349	165	295	207	206	0	0	0	0	0	0	0	0.428571	0.594937	0.538462	0.474359	0
27453518	C	T	T	T	T	T	T	1	0.307692	1	1	1	0.465517	70	78	36	63	30	58	0.540541	0.568182	0	0.422018	0.553191	0.595745	0	0	0	0	0	0
22390649	C	T	T	T	T	T	T	1	1	1	1	0.92	1	15	19	25	49	25	30	0	0.4	1	0.428571	1	1	0	0	0	0	0	0
10122985	G	T	T	T	A,T	T	T	1	1	1	1	1	1	20	11	4	2	7	34	0	1	1	0	0	1	0	0.909091	0	0	0	0
26747510	C	A	A	A	A	A	A	0.512281	0.522145	0.923387	0.985836	0.967123	0.578512	570	429	248	353	365	242	0	0.567633	0.50366	0	0.478873	0.385	0	0	0	0	0.463659	0
81110683	A	G	G	G	G	G	G	0.307692	1	1	1	0.333333	1	26	5	8	23	9	8	0.3125	1	0	0	0	0.285714	0	0	0	0.380952	0.571429	0
5853414	A	C	C	C	C	C	C	1	1	1	1	1	1	9	4	24	51	16	31	0	1	0.388889	0.636364	0.5	1	0	0.387097	0	0	0	0
71112229	T	A	A	A	A	A	A	0.75	0.666667	0.916667	0.769231	0.428571	0.304348	4	3	12	26	7	69	1	0	0	0	0	0	0	0	0.75	0	0	0
62346792	T	C	C	C	C	C	C	1	1	1	1	1	1	8	4	8	6	4	5	0	0	1	0	1	0	0.416667	1	0	0	0	0.5
46930510	G	A	A	A	A	A	A	1	1	1	1	1	1	13	8	8	4	2	8	0	0	0	1	0	0.5	0.75	0	0	1	0.666667	0
76443745	C	T	T,A	T	T	T	T	1	1	1	1	1	1	6	9	2	2	3	2	0	0	0	0	0	0	1	0	0	1	0.916667	1
67904107	T	C	C	C	C	C	C	1	1	1	1	1	0.444444	6	2	6	9	5	36	1	0	0	1	1	0	0	0	0	0	0	0.363636
6041843	A	C	C	C	C	C	C	0.583333	1	0.967742	1	1	1	12	11	31	87	49	75	0	0.933333	0.294118	0.55	0.65	0.5	0	0.545455	0	0	0	0
5872917	C	A	A	A	A	A	A	0.6	0.666667	0.333333	0.764706	0.571429	0.541667	10	3	9	17	7	24	0	0	0	0	1	0	0	0.4	0	0	0	0
10481373	A	G	G	G	G	G	G	1	0.650794	0.5	0.387097	0.588235	0.484848	77	63	50	62	51	33	1	0	0	0.2	0	0	0	0	0	0	0	0.333333
30806092	G	C	C	C	C	C	C	0.710526	0.5	0.666667	0.789474	0.6875	0.363636	38	30	12	19	16	11	0	0	0.444444	0	0	0	0	0.368421	0.4	0.428571	0	0
25472287	A	T	T	T	T	T	T	0.487619	0.991667	0.806723	0.952381	0.386364	0.99505	525	120	119	63	132	202	0.529412	0.263473	0.292135	0.537234	0.532609	0.388889	0	0	0	0	0	0
79803419	T	C	C	C	C	C	C	1	1	0.909091	1	1	1	11	5	11	8	7	7	0	0.5	0	0	0	0	0.666667	1	1	0.666667	0	0
114261873	G	T	T	T	T	T	T	0.866667	0.222222	1	0.833333	0.782609	0.8125	15	9	9	12	23	16	0	0	0.733333	0	1	0.333333	0	0	0	0	0.375	0
24299873	T	C	C	C	C	C	C	1	0.730769	0.366667	0.386364	0.923077	1	42	26	30	44	13	26	0	0.666667	0.666667	0	0	0	0	0	0	0	1	0
11110266	C	T	T	T	T	T	T	0.521739	0.571429	0.5	0.48	1	1	23	49	18	25	5	90	0	1	0	0	0	0	0	0	0	0.714286	0.285714	0
8232023	C	T	T	T	T	T	T	1	0.666667	0.666667	0.555556	1	0.772727	17	9	3	9	2	22	0	0	0.428571	0.35	0	0	0.583333	0.5	0	0	0	0.727273
39273392	G	A	A	A,T	A	A	A	0.555556	1	1	1	0.6	1	27	7	4	5	5	31	1	0	0	0.75	0	0	1	0	0	0	0	0.333333
27309436	T	G	G	G	G	G	G	0.653846	1	1	1	0.526316	0.818182	26	31	8	22	19	11	0.538462	1	0.3125	0.291667	0.545455	0.238095	0	0	0	0	0	0
5134915	T	C	C	C	C	C	C	1	1	1	1	1	1	23	18	2	13	10	8	0	0	0.5	0	1	0	0	0	1	1	0	0.428571
25803011	A	G	G	G	G	G	G	0.136364	1	0.833333	1	1	0.666667	22	7	6	8	19	6	0	1	0.454545	0.4	0	0.714286	0	0	0	0	0	0
1896001	T	C	C	C	C	C	C	1	0.520548	0.64	0.733333	1	1	40	73	25	15	9	29	0	0.473684	0	0.588235	0.3125	0.25	0.333333	0.477273	0	0	0.393939	0
22275631	T	A	A	A	A	A	A	1	1	1	1	0.439024	0.8	85	43	35	76	41	25	0	0	0	1	0	0	0	0.363636	1	0.333333	0	0.478261
19259357	T	G	G	G	G	G	G	1	1	1	1	0.777778	1	12	7	3	6	9	4	0	0	0	0.714286	1	1	0	1	0	0	0	0
59436925	T	C	C	C	C	C	C	0.551724	0.642857	0.470588	0.298507	0.457143	0.431373	58	42	17	67	35	51	0	0.333333	0	0	0	0	0	0	0	0.457143	0	0
9647999	G	A	A	A	A	A	A	0.447917	0.477064	0.333333	0.378571	0.453125	0.41791	96	109	105	140	64	67	0.446429	0	0	0	0	0	0	0	0	0	0	0
31965885	C	T	T	T	T	T	T	0.2	0.533333	0.75	0.5	0.266667	1	15	15	4	14	15	7	0	0	0	0	0.357143	0	0	0	0	0	0.833333	0
114283781	C	T	T	T	T	T	T	0.821429	0.487179	0.5	0.84	0.405405	0.744681	28	39	12	25	74	47	0.685714	0	0	0	0	0	0	0	0	0.442623	0.616667	0
5861715	C	A	A	A	A	A	A	0.36	1	1	1	1	1	25	15	54	83	29	90	0	0.928571	0.396947	0.338462	0.478261	0.596491	0	0.571429	0	0	0	0
34777578	C	G	G	G	G	G	G	0.478333	0.997743	0.980392	0.991935	1	0.622222	600	443	153	248	307	135	0	0.477733	0	0.988142	0.514493	0.522013	0.519313	0	0	0	0	0
45696711	T	C	C	C	C	C	C	0.454545	0.391304	0.531915	0.522727	1	0.545455	88	46	47	44	65	88	0.416667	0.571429	0.409091	0	0	0	0	0	0	0	0	0
102271385	A	G	G	G	G	G	G	1	0.769231	0.333333	0.588235	0.75	0.209302	2	13	6	17	12	43	0	0	0	0.6	0	0	0	0.285714	0	0	0.4	0.315789
48870063	G	A	A	A	A	A	A	1	1	1	1	1	1	25	17	22	22	11	11	1	0	0	0.285714	1	1	0	0	0.666667	0	0	0
6930694	G	A	A	A	A	A	A	1	0.519685	0.989529	0.99639	0.98913	0.998765	304	254	191	554	184	810	0	0.997403	0	0.457831	0	0	1	0	0	0	0.529284	0.461538
4824366	T	C	C	C	C	C	C	0.352941	0.75	0.6	0.857143	1	1	17	16	10	21	10	38	0	0	0	0	0.555556	0.8	0	0	0.714286	0	0.444444	0
78829834	G	A	A	A	A	A	A	1	1	0.333333	0.454545	0.333333	0.466667	27	8	9	11	15	15	0	0	0.5	0	0.6	0	0	0	0	0.444444	0	0
48635600	T	C	C	C	C	C	C	0.484969	0.999242	0.996475	0.998675	0.541667	0.995868	2761	3959	851	2264	1920	1210	0.424414	0.502784	0.370918	0.327324	0	0.375244	0	0	0	0.57232	0.401036	0
9833688	G	C	C	C	C	C	C	1	1	1	1	1	1	7	16	7	18	8	17	0	0.958333	1	0	0	1	0	1	0	0	0	0
36977882	C	T	T	T	T	T	T	1	0.735294	0.363636	0.285714	1	0.625	52	34	33	42	62	24	0	0.6	0.463415	0	0.333333	0.571429	0	0	0	0	0	0
25814945	C	T	T	T	T	T	T	0.228571	1	0.888889	0.384615	1	0.333333	35	5	9	13	15	12	0	1	0.294118	0.5	0	0	0	0	0	0	0	0
26098600	C	T	T	T	T	T	T	0.578947	1	0.833333	0.777778	0.75	0.5	19	3	12	18	8	4	0	0	0	0	0	1	0	1	0	0	0	0.4
1080864	G	A	A	A	A	A	A	1	0.631579	1	1	0.4	0.65	50	19	13	36	5	20	0.702703	1	0	0.157895	0	0	0	0.782609	0	0	0	0
59439124	C	T	T	T	T	T	T	0.64	1	0.6875	0.42	0.666667	0.315789	25	10	32	50	27	19	0	0.285714	0	0	0	0	0	0	0	0.407407	0	1
106285624	C	T	T	T	T	T	T	0.996296	0.531136	0.179348	0.201044	0.172589	0.567164	270	273	184	383	197	67	0	0.194444	0	0	0	0	0	0	0.417476	0	0	0
29365027	C	T	T	T	T	T	T	1	1	0.508475	0.58427	0.678161	0.698413	166	145	59	89	87	63	0	0	1	0.427273	0	0	0	0	0	0	0.530612	0.476562
5854893	G	A	A	A	A	A	A	0.333333	0.64	1	1	1	0.37037	15	25	48	79	21	108	0	1	0.439024	0.261905	0	0	0	0.615385	0	0	0	0
83823731	T	C	C	C	C	C	C	1	0.333333	1	0.75	0.9	0.642857	32	12	2	4	10	14	0	0	0.6	1	1	0	0	0	0	0	0	0
6042951	C	G	G	G	G	G	G	0.5	1	1	1	1	1	12	9	5	26	11	27	0	1	0	0.5	0.307692	1	0	0.666667	0	0	0	0
41101419	G	A	A	A	A	A	A	0.6	0.514286	1	0.973333	0.4	1	50	70	59	75	50	37	0	0	0.324324	0.514286	0	0	0	0.357143	0.636364	0	0.263158	0.367816
25983158	C	G	G	G	G	G	G	0.470588	0.647059	0.333333	0.65	0.5	0.421053	17	34	21	40	6	38	0	1	0	0	0	0	0	0	0	0	0	0
18741181	T	A	A	A	A	A	A	1	0.666667	0.9375	1	0.416667	1	11	3	16	24	12	26	1	0	0	0	0	0	1	0	1	0	0	0
66572402	G	A	A	A	A	A	A	0.597633	0.613636	0.586207	0.575581	1	0.449458	169	88	87	172	191	554	0	0	0	0	1	0.345238	0	0	0	0	0	0.460526
73999234	T	C	C	C	C	C	C	1	1	1	1	1	1	15	2	3	8	4	9	0	1	1	1	0	0	0	0	0	0.818182	0	0.166667
42552873	A	G	G	G	G	G	G	0.444444	0.666667	1	0.333333	0.5	0.266667	9	6	2	9	4	15	0	0	0	0	0	0	0	0	0	0	0.4	0.8
62688826	C	G	G	G	G	G	G	0.517241	1	1	1	1	1	29	5	4	23	15	12	0	0.666667	0	0.285714	0.555556	0	0	0	1	0	1	0
14890558	G	A	A	A	A	A	A	1	1	0.952381	1	1	1	26	9	21	87	26	32	0	0	0	1	1	1	0	0.944444	0	0	0	0
99143077	T	C	C	C	C	C	C	1	1	1	1	1	0.222222	4	2	2	14	4	9	0.214286	1	1	1	0	0	0	0	0	0	0	0
47105154	T	G	G	G	G	G	G	0.411765	1	1	1	1	0.947368	17	16	2	3	2	19	0	0	0.9	0	1	0	0.285714	0	0	0.5	0	0.666667
6042958	G	A	A,T	A	A	A	A	0.384615	1	1	1	1	1	13	9	6	25	11	27	0	1	0	0.5	0.307692	1	0	0.571429	0	0	0	0
59321213	T	C	C	C	C	C	C	1	1	1	1	1	1	91	94	7	4	10	2	0	0	1	1	0.352941	0	1	0	0	0.294118	0	0.348214
22390016	A	T	T	T	T	T	T	1	1	0.913043	1	0.931034	1	48	33	23	29	29	57	0.5	0	1	0.37931	1	0.964286	0	0	0	0	0	0
20234595	A	G	G	G	G	G	G	1	1	1	1	1	1	13	3	5	21	10	5	0	1	1	1	0	1	0	0	0	0	0	0
58737727	A	C	C	C	C	C	C	1	1	1	1	1	1	13	2	2	5	5	4	1	1	0	1	0	1	0	0	0	0	0	0
1749470	C	A	A	A	A	A	A	1	1	1	1	1	1	10	6	4	3	2	5	1	1	1	1	0	0	0	0	0	0	0	0
95500758	G	A	A	A	A	A	A	1	1	1	1	1	1	23	2	8	13	9	16	0	1	1	1	0	1	0	0	0	0	0	0
22647654	C	A	A	A	A	A	A	1	1	1	1	1	1	11	7	2	22	2	7	0	1	1	1	0	1	0	0	0	0	0	0
89327120	G	A	A	A	A	A	A	1	1	1	1	1	1	11	9	10	12	3	16	0	1	1	1	0	1	0	0	0	0	0	0
116661449	T	C	C	C	C	C	C	1	1	1	1	0.666667	1	15	4	5	7	3	7	0	1	1	1	0	0.666667	0	0	0	0	0	0
720349	C	A	A	A	A	A	A	0.5	0.666667	1	1	1	1	10	9	3	10	2	4	1	1	0.666667	0.5	0	0	0	0	0	0	0	0
26442171	T	C	C	C	C	C	C	1	1	1	1	1	1	6	5	2	4	2	3	0	0	1	1	1	0	1	0	0	0	0	0
42902969	A	T	T	T	T	T	T	1	1	1	1	1	1	1	1	2	8	2	3	0	1	0	1	0	1	0	0	0	0	1	0
76932505	G	C	C,A	C	C	C	C	1	1	1	1	1	1	19	9	5	7	2	2	0	1	1	0	0	1	0	1	0	0	0	0
99483515	A	G	G	G	G	G	G	1	1	1	1	1	1	6	2	11	25	16	21	0	1	0	1	0	1	0	0	0	1	0	0
56767262	T	C	C	C,A	C	C	C	1	1	1	1	1	1	13	28	110	45	17	51	0	1	1	1	0	0	0	1	0	0	0	0
9833559	A	G,T	G	G	G	G,T	G	1	1	1	1	1	1	12	12	7	12	8	16	0	1	1	0	0	1	0	1	0	0	0	0
50845652	A	G	G	G	G	G	G	1	1	1	1	1	1	10	4	14	17	16	2	0	0	1	1	1	0	0	0	1	0	0	0
8405911	C	A	A	A	A	A	A	1	1	1	1	1	1	6	2	2	4	6	2	1	0	1	0	0	1	0	0	0	0	1	0
58553170	T	C	C	C	C	C	C	1	1	1	1	1	1	5	3	3	7	3	10	1	0	1	1	0	0	0	0	0	0	1	0
61788247	G	A	A	A,T	A	A	A	1	1	1	1	1	1	12	2	14	7	8	5	1	0	1	0	0	1	0	0	0	0	1	0
38560527	T	C	C	C	C	C	C	1	1	1	1	1	1	34	95	85	133	137	330	0	1	1	1	0	0	0	1	0	0	0	0
1040831	G	A,T	A	A	A	A	A	1	1	1	1	1	1	7	4	2	6	2	13	0	1	1	0	1	0	0	0	0	1	0	0
98100323	G	A	A	A	A	A	A	1	1	1	1	1	1	2	4	16	41	5	7	1	0	1	1	0	0	1	0	0	0	0	0
98100341	G	A	A	A,C	A	A	A	1	1	1	1	1	1	2	3	13	33	6	7	1	0	1	1	0	0	1	0	0	0	0	0
43638542	G	A	A	A	A	A	A	1	1	1	1	1	1	17	3	2	11	3	7	0	1	1	0	0	1	0	0	0	0	0	1
28298676	T	C	C	C	C	C	C	1	1	1	1	1	1	4	2	6	3	5	6	1	0	1	1	0	0	0	0	0	0	0	1
47524061	N	G	G	G	G	G	G	1	1	1	1	1	1	10	4	5	15	2	8	1	0	0	1	1	0	0	0	0	0	0	1
60620106	G	T	T	T	T	T	T	1	1	1	1	1	1	48	39	42	44	20	11	0	0	1	1	0	1	0	0	0	0	0	1
89359940	C	G	G	G	G	G	G	1	1	1	1	1	1	2	2	5	13	3	4	0	1	0	0.5	1	0	0	0.625	0.875	0	0	0
67683145	C	T,A	T	T	T	T	T	1	1	1	1	1	1	13	14	9	28	4	8	0	0	0	1	1	0	0	1	0	0	1	0
21300665	A	T	T	T	T	T	T	1	1	1	1	1	1	6	3	3	2	3	6	0	0	1	0	0	1	1	0	0	1	0	0
8294183	C	T	T	T	T	T	T	1	1	1	1	1	1	9	4	8	10	7	5	0	0	1	1	0	0	1	0	0	1	0	0
15973958	C	T	T	T	T	T	T	1	1	1	1	1	1	20	7	26	27	12	42	1	0	1	0	0	0	1	0	0	1	0	0
52319800	A	G	G	G	G	G	G	1	1	1	1	1	1	6	2	4	6	4	2	0	0	1	1	0	0	1	0	0	1	0	0
66995699	C	T	T	T	T	T	T	1	1	1	1	1	1	7	6	5	14	5	43	0	1	0	1	0	0	0	1	0	0	1	0
99918825	C	T	T	T	T	T	T	1	1	1	1	1	1	5	6	7	11	6	4	1	0	0	0	1	0	0	1	1	0	0	0
106152858	C	T	T	T	T,A	T	T	1	1	1	1	1	1	7	7	4	3	4	4	0	1	0	0	1	0	0	0	0	1	1	0
112742713	A	G	G	G	G	G	G	1	1	1	1	1	1	5	6	3	2	15	5	0	0	1	0	1	0	1	0	0	0	1	0
29248101	T	C	C	C	C	C	C	1	1	1	1	1	1	2	10	9	9	2	10	0	0	1	1	0	0	1	0	0	0	0	1
32190775	A	C	C	C	C	C	C	1	1	1	1	1	1	5	7	7	5	13	9	0	0	1	1	0	0	0	0	0	0	1	1
46755516	A	T	T	T	T	T	T	1	1	1	1	1	1	4	7	5	15	10	8	0	1	1	0	0	0	0	0	1	0	0	1
10502584	A	C	C	C	C	C	C	1	1	1	1	1	1	7	3	7	7	5	2	0	0	0	1	0	1	0	0	1	0	0	1
31113553	T	C	C	C	C	C	C	1	1	1	1	1	1	3	5	6	11	3	3	0	0	1	1	0	0	0	0	1	0	0	1
52276860	A	C	C	C	C	C	C	1	1	1	1	1	1	10	6	8	19	3	2	0	0	1	0	1	0	0	1	0	0	0	1
53189280	C	G	G	G	G	G	G	1	1	1	1	1	1	2	2	9	3	2	3	1	0	0	1	0	0	0	1	0	0	0	1
61789424	T	C	C	C	C	C	C	1	1	1	1	1	1	5	2	8	7	3	5	0	0	1	0	0	1	1	0	0	0	0	1
32190775	A	C	C	C	C	C	C	1	1	1	1	1	1	5	7	7	5	13	9	0	0	1	1	0	0	0	0	0	0	1	1
81908310	T	C	C	C	C	C	C	1	1	1	1	1	1	2	4	3	9	2	6	0	0	0	1	1	0	1	0	0	0	0	1
51536084	C	G	G	G	G	G	G	1	1	1	1	1	1	2	3	2	2	2	2	0	0	1	0	0	1	0	1	0	0	0	1
60285128	A	G	G	G	G	G	G	1	1	1	1	1	1	6	4	6	3	3	2	0	0	1	0	1	0	0	0	1	0	0.5	0.5
15294629	T	C	C	C	C	C	C	1	1	1	1	1	1	2	3	6	5	2	4	0	1	1	0	0	0	0	0	0	1	0	1
111201523	G	T	T	T,A	T	T	T	1	1	1	1	1	1	2	7	5	3	7	7	0	0	1	0	0	1	1	0	0	0	0	1
60785172	A	T	T	T	T	T	T	1	1	1	1	1	1	9	16	9	10	2	6	0	1	0	0	1	0	0	0	0	0	1	1
130271349	C	T	T	T	T	T	T	1	1	1	1	1	1	3	8	3	11	4	2	0	0	1	1	0	0	0	0	0	1	0	1
78826379	G	A	A	A,T	A	A	A	1	1	1	0.75	1	1	5	7	5	8	10	5	0.75	0	0	0	1	0	0	0	0	1	0	1
51536088	T	G	G	G	G	G	G	1	1	1	1	0.666667	1	2	3	2	2	3	2	0	0	1	0	0	0.666667	0	1	0	0	0	1
39657066	T	C	C	C	C	C	C	1	1	1	1	1	1	9	8	8	4	7	3	0	0	0	1	0	0	1	0	0	1	1	0
39657071	A	G	G	G	G	G	G	1	1	1	1	1	1	9	8	10	7	7	3	0	0	0	1	0	0	1	0	0	1	1	0
84342589	C	T	T	T	T	T	T	1	1	1	1	1	1	8	2	2	3	5	3	0	0	0	0	0	1	0	1	1	1	0	0
51345717	A	G	G,T	G	G	G	G	1	1	1	1	1	1	10	4	6	26	9	7	0	0	1	0	0	0	1	0	0	1	1	0
105377326	G	A	A	A	A	A	A	1	1	1	1	1	1	6	5	21	23	7	17	0	0	0	0	0	1	1	0	0	1	1	0
105380580	G	A	A	A	A	A	A	1	1	1	1	1	1	10	8	4	10	11	24	0	0	0	0	0	1	1	0	0	1	1	0
1753378	G	C	C	C	C	C	C	1	1	1	1	1	1	11	3	14	7	14	9	0	0	0	0	1	0	1	0	0	1	0	1
36811035	T	A	A	A	A	A	A	1	1	1	1	1	1	2	6	2	7	7	7	0	0	0	0	0	1	0	1	0	1	0	1
69978416	G	T	T	T	T	T	T	1	1	1	1	1	1	3	5	2	4	2	9	0	0	1	0	0	0	0	0	0	1	1	1
6144550	C	T	T	T	T	T	T	1	1	1	1	1	1	10	2	8	11	2	13	0	0	1	0	0	0	1	0	1	0	0	1
6163907	A	G	G	G	G	G	G	1	1	1	1	1	1	4	5	24	25	4	16	0	0	0	0	0	1	1	0	0	1	0	1
6171288	C	T	T	T	T	T	T	1	1	1	1	1	1	3	6	15	29	4	23	0	0	0	0	1	0	0	1	0	0	1	1
14867497	A	G	G	G	G	G	G	1	1	1	1	1	1	4	2	2	5	5	2	0	0	0	1	0	0	0	0	1	1	0	1
36542384	T	C	C	C	C	C	C	1	1	1	1	1	1	2	4	3	7	2	6	0	0	0	1	0	0	0	0	1	1	0	1
29366419	T	C	C	C	C	C	C	1	1	1	1	1	1	10	5	2	4	2	16	0	0	0	1	0	0	1	0	0	0	1	1
28427642	C	A	A	A	A	A	A	1	1	1	1	1	1	2	3	5	4	2	9	0	0	0	0	0	1	1	0	0	0	1	1
19446483	G	T	T	T	T	T	T	1	1	1	1	1	1	4	5	3	2	4	8	0	1	0	0	0	0	0	1	0	1	0	1
75271540	C	A	A	A,T	A	A	A	1	1	1	1	1	1	6	11	7	11	3	10	0	0	0	1	0	0	0	0	1	1	0	1
21904940	C	T	T	T	T	T	T	1	1	1	1	1	1	5	77	18	73	55	2	1	0	0	0	0	0	1	0	1	0	0	1
9377986	A	G	G	G	G	G	G	1	1	1	1	1	1	2	7	2	3	4	4	0	0	1	0	0	0	0	1	0	0	1	1
91770555	T	C	C	C	C	C	C	1	1	1	1	1	1	12	2	3	9	3	3	0	0	0	0	0	1	0	0	1	1	0	1
64263820	A	G	G	G	G	G	G	1	1	1	1	1	1	6	6	7	18	3	2	0	1	0	1	1	1	0	0	0	0	0	0
54799314	A	G	G	G	G	G	G	1	1	1	1	1	1	4	5	2	12	3	2	0	0	1	1	1	1	0	0	0	0	0	0
65735424	C	T	T	T	T	T,G	T	1	1	1	1	1	1	8	4	7	4	4	2	0	0	0	0	0	0	1	0	1	1	1	0
35760364	G	A	A	A	A	A	A	1	1	1	1	1	1	8	3	9	3	3	2	0	0	0	0	0	0	0	1	1	1	1	0
119663431	C	T	T	T	T	T	T	1	1	1	1	1	1	2	2	3	5	3	2	0	0	0	0	1	1	0	1	0	0	1	0
119663438	C	T	T	T	T	T	T	1	1	1	1	1	1	2	2	5	5	3	2	0	0	0	0	1	1	0	1	0	0	1	0
119663458	C	T	T,A	T	T	T	T	1	1	1	1	1	1	4	2	7	5	3	2	0	0	0	0	1	1	0	1	0	0	1	0
126236175	C	A	A	A	A	A	A	1	1	1	1	1	1	11	5	2	8	3	18	0	0	0	0	0	0	0	1	1	1	1	0
60640268	A	G	G	G	G	G	G	1	1	1	1	1	1	4	8	5	4	4	5	0	1	0	0	1	1	0	0	0	0	0	1
44970171	C	T	T	T	T	T	T	1	1	1	1	1	1	3	6	10	14	2	1	0	0	0	0	1	1	1	0	0	0	0	1
55214605	T	C	C	C	C	C	C	1	1	1	1	1	1	10	2	2	7	6	10	0	0	0	0	1	1	0	0	0	0	1	1
28372859	G	A	A	A	A	A	A	1	1	1	1	1	1	5	4	5	2	2	2	0	0	0	0	0	0	1	0	1	1	0	1
107417188	G	A	A	A	A	A	A	1	1	1	1	1	1	4	16	9	15	3	3	0	0	1	0.666667	0	0	1	0.666667	0	0	0	0.666667
23899403	G	A	A	A	A	A	A	0.487603	0.635359	0.535211	0.630662	0.508108	0.5	242	181	142	287	185	218	0.276923	0.28125	0.294521	0	0	0.446602	0	0	0	0	0	0
25472325	T	C	C	C	C	C	C	0.410909	0.28866	0.8	0.904762	1	0.314465	550	97	55	42	65	159	0.666667	0	0	0	0.493333	0.561798	0	0	0	0	0	0
134301808	C	T	T	T	T	T	T	1	1	1	1	1	1	2	9	5	8	4	4	1	0	0.75	0	0	0	0	1	0.8	0	0	0.454545
16484901	A	G,T	G	G	G	G	G	0.977273	0.925926	1	0.947368	0.97561	1	44	27	7	38	41	30	0	0	1	1	0	0	1	0	0	0	0	0.833333
45444903	T	C	C	C	C	C	C	0.385321	1	1	1	1	0.417219	109	72	64	121	127	151	0	0.434783	0.962264	0.409091	0.492063	0.511905	0	0	0	0	0	0
25049827	G	T	T	T	T	T	T	1	0.727273	1	1	0.285714	1	28	11	20	27	7	14	0	1	0	0	0	0	0.555556	0.8	0	0	0.666667	0
5857997	T	C	C	C	C	C	C	1	1	1	1	1	1	11	13	18	31	4	29	0	1	0.466667	0.777778	0.536585	0.6875	0	0.541667	0	0	0	0
5859008	A	G	G	G	G	G	G	0.275862	1	0.975	0.905882	1	1	29	41	40	85	39	144	0	1	0.423913	0.305085	0.460733	0.37037	0	0.607143	0	0	0	0
43422547	A	G	G	G	G	G	G	1	0.888889	1	1	1	0.5	7	9	12	19	4	6	0	1	0.666667	0.666667	0	0	0.4	0	0	0	0.666667	0
5862339	G	A	A	A	A	A	A	0.5	0.833333	1	1	1	1	8	18	22	45	19	73	0	1	0.405405	0.428571	0.375	0.538462	0	0.6	0	0	0	0
95419274	C	A	A	A	A	A	A	0.2	1	1	1	1	1	10	2	6	24	6	7	0	1	0	0	1	0	0.5	0	0	0.714286	0	0
62332184	T	C	C	C	C	C	C	0.571429	0.666667	1	1	0.666667	0.777778	14	6	25	32	6	18	1	0	0	0	0	0.363636	0	0	1	0	0.333333	0
113137072	A	C	T	C	C	C,T	C	0.818182	1	1	1	1	1	11	3	2	2	8	7	0	1	1	0	0	0.833333	0	1	0	0	0	0
6041996	G	A	A	A	A	A	A	0.7	1	1	1	1	1	10	20	31	101	50	177	0	1	0.454545	0.705882	0.527778	0.777778	0	0.25	0	0	0	0
41769165	G	A	A	A	A	A	A	0.666667	1	1	1	1	1	9	14	3	10	7	5	0	0	0.333333	0	0.6	0.75	0	0	0	0	1	1
5871104	A	G	G	G	G	G	G	1	0.2	0.608696	1	0.833333	0.333333	2	10	23	20	6	6	0	0	0.166667	0.588235	0.425287	0.375	0	0.4375	0	0	0	0
8785390	A	G	G	G	G	G	G	1	0.25	0.592593	0.714286	1	1	42	20	27	35	13	29	0	1	0	0	0	0	0.375	0	0.2	0	0	1
30622062	A	G	G	G	G	G	G	1	1	1	1	0.319149	1	85	104	33	34	47	12	0.234043	0.395833	0	0	1	1	0.394231	0	0	0.314286	0	0
107921699	C	T	T	T	T	T	T	0.714286	0.3	1	1	0.375	0.25	7	10	9	14	8	12	0	0.333333	0	0	0	0	0	0.611111	0.714286	0	0	0
32183962	G	C	C	C	C	C	C	0.646552	0.678832	0.598266	0.604905	0.613333	1	348	411	346	367	225	203	0.679426	0	0.377892	0.522222	0	0	0	0	0	0	0.581818	0
6117896	T	G	G	G	G	G	G	1	1	1	1	1	0.978723	7	9	3	27	16	47	0	0	0	0	1	1	0	0	0	1	0	1
6038740	T	G	G	G	G	G	G	0.535714	0.993789	0.986301	0.992126	1	1	28	161	73	127	90	391	0	1	0.625	0	0.52381	0.818182	0	0.5625	0	0	0	0
92411843	T	C	C	C	C	C	C	0.8	0.5	0.857143	0.833333	0.666667	0.666667	5	4	7	6	6	6	0	0.214286	0.375	0.25	0	0	0	0.222222	0	0.333333	0.666667	0.285714
117918135	G	C	C	C	C	C	C	0.6	0.375	1	1	1	1	15	8	6	19	16	16	0.666667	0	0.666667	0.461538	0	0.75	0	0	0	0	0	0.454545
114283852	C	T	T	T	T	T	T	0.772727	0.466667	0.684211	0.8	0.321429	0.75	22	30	19	20	56	48	0.676471	0	0	0	0	0	0	0	0	0.414141	0.729167	0
50609891	G	A	A	A	A	A	A	0.257812	0.25	0.340909	0.222222	1	0.408163	128	48	44	36	49	49	0	0	0	0	0	0	0	0	0.2	0	0.305556	0
70260369	T	G	G	G	G	G	G	0.872727	0.526316	1	1	0.181818	1	55	19	29	43	11	37	0	0	0.212766	0	1	0	0.395062	0	0	0	0	1
25555280	A	G	G,T	G	G	G	G	0.972222	1	1	1	1	1	72	89	57	68	40	6	0	0	1	0	1	1	0	0	0	0	0	1
53307352	A	G	G	G	G	G	G	0.376712	1	1	0.991525	1	0.466667	146	114	59	118	62	30	0	0	0.5	0	0.986667	0	0.506494	0	0.407407	0.462264	0	0
32950735	T	C	C	C	C	C	C	1	0.368421	0.285714	0.391304	0.9	0.487805	48	19	7	23	10	41	0	0	0	1	0	0	0	0.461538	0	0	0	0
42315626	C	G	G	G	G	G	G	0.741935	0.391304	1	1	0.68	0.315789	31	23	14	26	25	19	0	1	0	0.428571	0.733333	0	0	0	0	0	0	0
16363175	G	T	A	T	T	T	T	1	0.315789	1	0.4	1	1	2	19	7	5	7	6	0	0	0	0	1	0	1	0.75	0	0	0	0
42315895	T	C	C	C	C	C	C	0.442623	0.586957	1	1	0.444444	0.568966	61	46	12	39	27	58	0	1	0	0.515152	0.5625	0	0	0	0	0	0	0
73639768	T	C	C	C	C	C	C	0.333333	1	1	1	1	0.416667	6	6	12	19	5	24	1	0	1	0.5	0	0.285714	0	0	0	0	0	0
25824159	T	C	C	C	C	C	C	0.5	0.833333	0.5	0.75	0.555556	0.7	6	6	4	4	9	10	0	0	1	0.5	0	0	0	0	0	0	0	0.375
34725906	A	G	G	G	G	G	G	1	1	1	0.995098	1	1	353	148	134	204	219	112	0.536913	0.991071	0	0.967742	0.472843	0.558219	0.504886	0	0	0	0	0
98100345	A	G	G	G,T	G	G	G	1	1	1	1	1	0.857143	2	3	13	32	6	7	0.894737	0	1	1	0	0	1	0	0	0	0	0
6042657	T	C	C	C	C	C	C	1	1	0.96	1	1	1	6	12	25	36	20	81	0	1	0.5	0.375	0.625	0.75	0	0.75	0	0	0	0
6042658	G	A	A	A	A	A	A	1	1	0.96	1	1	1	6	12	25	36	20	81	0	1	0.5	0.375	0.625	0.75	0	0.75	0	0	0	0
6130488	G	A	A	A	A	A	A	0.928571	1	1	0.952381	0.846154	0.888889	14	13	5	21	13	36	0	0.6	0	0	0	0	0	0.666667	0	0.769231	0.8	0.823529
99919708	A	C	C	C	C	C	C	1	1	0.956522	1	1	1	3	2	23	28	6	25	0	1	0	0	1	0	0	1	0	0	1	0
31565330	T	A	A	A	A	A	A	1	1	0.955556	1	1	1	14	14	45	11	8	55	0	0	0	1	1	1	0	1	0	0	0	0
6797026	T	G	G	G	G	G	G	0.285714	0.444444	0.714286	0.576923	0.6	1	7	9	21	26	5	7	0	1	0	0	0	0	0	0	0	0	0.666667	0
114324119	C	G	G	G	G	G	G	1	0.285714	1	1	1	0.666667	3	21	5	8	3	6	1	0	0	0	0	0	0	0	0	0	1	1
71416994	G	C	C	C	C	C	C	0.238095	1	1	1	1	0.866667	21	50	27	41	25	30	0	0.807692	0.44	0	0.692308	0	0.7	0	0	0	0	0.513514
6041811	A	G	G	G	G	G	G	0.5	1	1	1	1	1	12	18	34	82	47	83	0	1	0.266667	0.47619	0.68	0.588235	0	0.538462	0	0	0	0
6288196	T	C	C	C	C	C	C	1	1	1	0.992537	1	0.954023	12	36	100	134	23	87	0	1	0	0	0	0	0	1	0	0	1	1
92063963	A	G	G	G	G	G	G	0.55102	0.708333	0.738095	0.567568	0.604651	1	49	24	42	74	43	155	0	0	0.510204	0.410256	1	0	0.304348	0	0	0	0	0
73480920	A	G	G	G	G	G	G	1	1	1	1	1	1	4	3	3	15	1	9	1	0	0	1	0	1	0.5	0	0	0.555556	0	0
67798546	C	T	T	T	T	T	T	1	1	1	1	1	1	10	4	6	16	3	2	0	0	0	1	0	0.555556	0	0	1	0.5	0	1
90258441	A	G	G	G	G	G	G	0.709677	1	1	1	1	0.647059	31	22	14	31	15	17	0	1	0.56	0.454545	0	0	0.733333	0	0	0	0.666667	0
40476695	G	A	A	A	A	A	A	0.625	0.842105	0.875	0.789474	1	1	8	19	8	19	11	6	0	0	0	0.8	0	0	0.428571	1	0	0.6	0	0.363636
16880609	T	C	C	C	C	C	C	1	0.522581	1	1	1	1	160	155	61	108	99	42	0.410448	1	0	0	0	0	1	0	0	0	0.6875	0.485549
5854105	G	T	T	T	T	T	T	0.833333	1	0.888889	1	1	1	6	7	18	25	10	43	0	1	0.5	0.461538	0.482759	0.625	0	0.714286	0	0	0	0
5855930	G	A	A	A	A	A	A	0.333333	1	1	1	1	1	18	8	50	60	15	72	0	1	0.405797	0.363636	0.459016	0.530612	0	0.636364	0	0	0	0
5861147	C	A	A	A	A	A	A	0.414894	1	0.988604	0.995475	1	0.998172	94	73	351	442	81	547	0	1	0.475943	0.376855	0.471254	0.506849	0	0.628571	0	0	0	0
43569442	G	A	A	A	A	A	A	0.6	1	0.555556	0.666667	0.5	0.428571	15	13	9	6	4	7	0	0.5	0.363636	0	0	0	0	0.2	0.75	0	0	0
47844900	A	G	G	G	G	G	G	0.458333	1	0.571429	0.5	0.545455	1	24	14	7	4	11	25	0	0	0.5	0.888889	0	0.75	0	0	0	0	0	0
58670218	A	G	G	G	G	G	G	1	1	1	1	1	0.571429	15	38	24	18	13	7	0	0	0.391304	0	1	0	0.444444	0.8	0	0	0	1
6038891	A	T	T	T	T	T	T	0.7	0.978022	0.868687	0.904348	0.978261	0.899023	20	182	99	115	92	307	0	0.833333	0.470588	0.6	0.444444	0.545455	0	0.5	0	0	0	0
6042085	T	G	G	G	G	G	G	0.75	1	1	0.990099	1	0.987654	8	8	26	101	51	162	0	1	0.55	0.615385	0.555556	0.8	0	0.272727	0	0	0	0
34613648	A	G	G	G,T	G	G	G	0.428571	1	1	1	0.9375	1	7	11	4	4	16	10	0	0	0	0	0	0	0	1	0	0.6	0.833333	1
111915262	A	G	G	G	G	G	G	0.689655	0.666667	0.73913	0.72	0.6	0.478261	29	27	23	25	10	23	0	0.545455	0	0	0	0	0	0.5	0.916667	0	0	0
6041956	T	A	A	A	A	A	A	0.714286	1	1	1	1	0.990476	7	20	32	79	31	105	0	1	0.384615	0.625	0.612903	0.818182	0	0.333333	0	0	0	0
37996950	A	G	G	G	G	G	G	1	1	1	1	0.457143	1	131	46	38	94	70	56	0	0.442623	1	0	0.533333	0	1	0	0	0	0	0.55102
42315258	G	C	C	C	C	C	C	0.473684	0.333333	0.97619	0.974359	0.5	0.573333	38	54	42	39	16	75	0	1	0	0.577778	0.325	0	0	0	0	0	0	0
1067932	C	T	T	T	T	T	T	1	0.588235	1	1	0.255814	0.222222	68	51	23	49	43	9	0.592593	1	0	0	0	0	0	0.549296	0	0	0	0
32191720	G	A	A	A	A	A	A	0.650685	0.658031	0.675781	0.723473	0.609091	1	292	386	256	311	220	489	0.595238	0	0.498282	0.605	0	0	0	0	0	0	0.697436	0
19386659	G	T	T	T	T	T	T	1	0.583333	1	1	1	1	44	12	16	25	23	10	0	1	1	0.4	0.444444	0.818182	0	0	0	0	0	0
26701415	T	C	C	C	C	C	C	0.8	1	1	1	1	0.333333	10	3	9	3	4	9	0	0	1	0	0	1	0	0.714286	0	0	0	0.5
59321131	C	G	G	G	G	G	G	1	1	1	1	1	1	111	108	12	5	16	5	0	0	1	1	0.26087	0	1	0	0.1875	0.2	0	0.43299
120279130	T	C	C	C	C	C	C	1	0.916667	1	1	1	1	18	12	5	7	7	8	0	0	1	1	0	0	1	0	0	0	1	0
61237266	T	C	C	C	C	C	C	0.417197	1	1	1	1	1	314	188	122	205	285	242	1	0	0.993151	0.504348	0	0.45082	0	0	0	0	0	0.552846
5861334	T	C	C	C	C	C	C	0.430108	1	1	1	1	0.995381	93	45	325	338	39	433	0	1	0.507605	0.414414	0.455665	0.505556	0	0.627792	0	0	0	0
5861205	A	C	C	C	C	C	C	0.469388	1	0.971609	0.985849	0.990196	0.989562	98	72	317	424	102	479	0	0.99187	0.430039	0.406877	0.480365	0.551587	0	0.631485	0	0	0	0
37996995	A	C	C	C	C	C	C	1	0.984848	0.977778	1	0.447059	1	143	66	45	98	85	42	0	0.45977	1	0	0.565217	0	1	0	0	0	0	0.471698
49475339	G	A	A	A	A	A	A	1	1	1	1	0.428571	1	8	18	12	14	7	11	1	0.666667	0	0.6	1	0	0	0	0.25	0	0	0
71252015	A	T	T	T	T	T	T	0.277778	0.785714	0.428571	0.166667	0.352941	0.8	18	14	7	12	17	10	0	0	0	0.5	0	0	0	0	0	0	0	0.4
100531928	A	G	G	G	G	G	G	0.909091	1	1	1	1	1	11	4	2	8	7	2	0	0	1	1	0	0	1	0	0	0	0	1
97245055	A	G	G	G	G	G	G	1	1	1	1	0.714286	0.285714	4	4	2	6	7	7	0	0	1	0	0	0	0.272727	1	0	0	0.818182	0
71272353	A	G	G	G,T	G	G	G	0.685714	1	1	1	0.4	0.833333	35	28	11	10	10	6	0	0	0	0.294118	0	0	0	1	0.769231	0.411765	0.538462	0
5861306	T	C	C	C	C	C	C	0.458333	1	0.990909	1	1	0.997807	96	54	330	357	44	456	0	1	0.500942	0.485294	0.444584	0.479381	0	0.634271	0	0	0	0
68279009	G	C	C	C	C	C	C	0.428571	0.777778	0.428571	0.444444	0.421053	0.4	35	9	7	9	19	10	0	1	0	0	0	0	0	0	0	0	0	0
45506542	T	C	C	C	C	C	C	1	1	1	1	0.4	1	2	7	3	7	5	6	0	0	0	0	1	1	0.5	0	0	0	0	1
54626315	G	C	C	C	C	C	C	1	1	1	1	1	1	15	4	4	21	6	10	0	1	0	1	0	0	0.5	0.6	0	0	0	1
102123997	T	C	C	C	C	C	C	1	1	1	1	1	1	5	3	5	7	2	5	0.333333	1	0.444444	0.5	0	1	0	0	0.823529	0	0	0
27673290	T	C	C	C	C,A	C	C	0.47619	1	1	1	0.4	0.8	21	2	17	13	5	5	0.25	0	0	0.75	1	0.777778	0	0	0	0	0	0
5863113	A	G	G	G	G	G	G	0.666667	1	1	0.958333	1	1	6	9	17	24	10	14	0	1	0.666667	0.666667	0.384615	0.409091	0	0.6	0	0	0	0
17270095	A	G	G	G	G	G	G	1	1	0.974359	0.961039	0.467742	1	83	101	39	77	62	74	0.55814	1	0	0.485437	0.4375	0.532258	0	0	0	0.492063	0	0
78133375	G	A	A	A,C	A,T	A	A	1	1	0.969697	0.925926	1	1	12	17	33	54	8	35	0	1	0	0	0	0	0	1	0	0	1	1
71463046	T	C	C	C	C	C	C	1	1	1	1	1	1	20	17	6	7	6	4	0	0.25	1	0.2	0	0.5	1	0	0	0.666667	0.488889	0
19387916	C	T	T	T	T	T	T	1	0.285714	1	1	0.727273	1	26	14	13	23	11	7	0	1	1	0.785714	0	0.333333	0	0	0	0	0	0
97652740	A	G	G	G	G	G	G	0.421053	1	1	1	0.75	0.222222	19	4	7	15	8	9	0	1	0	0	0.5	0	0	0	0	0	1	0
26144158	C	G	G	G	G	G	G	0.583333	0.6875	0.5	0.95	0.5	0.227273	12	16	4	20	10	22	0	1	0	0	0	0	0	0	0.555556	0	0	0
71416262	C	T	T	T	T	T	T	0.615385	1	1	1	1	0.451613	39	61	38	63	37	31	0	0.6	0.590909	0	0.588235	0	0.735294	0	0	0	0	0.661538
67747678	G	A	A	A	A	A	A	0.909091	1	1	1	1	1	11	17	23	6	10	31	0.6	0.6	0	0.481481	0.888889	0.416667	0.533333	0	0	0	0.5	0
5874305	C	A	A	A	A	A	A	1	0.764706	0.631579	0.52381	0.444444	0.346154	3	17	19	21	9	78	0	0.333333	0.388889	0	0.264151	0.454545	0	0.235294	0	0	0.146341	0
103948952	A	G	G	G	G	G	G,T	1	1	0.7	0.4375	0.75	1	6	12	10	32	4	6	0	0	1	0	0	1	1	0	0	0	0	0
5855086	T	C	C	C	C	C	C	0.172414	1	1	1	1	1	29	27	39	50	28	115	0	1	0.464286	0.451613	0.393617	0.428571	0	0.548387	0	0	0	0
6288148	G	T	T	T	T	T	T	0.923077	1	1	0.974359	1	0.939759	13	35	67	117	19	83	0	0.956522	0	0	0	0	0	1	0	0	1	1
5858312	A	T	T	T	T	T	T	0.5	1	0.931034	0.924051	1	1	12	9	29	79	26	50	0	1	0.444444	0.375	0.386667	0.571429	0	0.69697	0	0	0	0
119816293	C	T	T	T	T	T	T	1	0.782609	1	0.8	1	1	4	23	6	5	2	2	0	0	1	0	0.75	0.714286	0.666667	0	0	0	0	0.571429
22804206	T	C	C	C	C	C	C	0.692308	1	1	1	1	1	13	18	9	36	11	35	0	0	0	0	0	0.714286	0.6	0.5	1	0	0	1
5705976	C	A	A	A	A	A	A	1	1	0.933333	0.833333	1	1	10	7	15	36	4	10	0	0	0	0	0	0	0	0.888889	0.4	1	1	0.6
5855680	A	G	G	G	G	G	G	0.630435	1	0.966102	1	1	1	46	11	59	80	41	81	0	1	0.473214	0.581818	0.388535	0.585714	0	0.692308	0	0	0	0
5854383	T	C	C	C	C	C	C	0.6	1	1	0.941176	1	1	15	3	11	17	12	36	0	1	0.666667	0	1	0	0	1	0	0	0	0
77513277	G	C	C	C	C	C	C	0.75	0.652174	0.727273	0.485714	0.25	0.675676	16	23	11	35	20	37	0	0	0	0.666667	0	1	0	0	0	0	0	0
8511184	T	A	A	A	A	A	A	1	0.857143	1	0.9375	1	0.551724	4	7	22	32	5	29	0	0	0	0	0	1	0.888889	0	0.916667	0.666667	0	0
71460489	A	G	G	G	G	G	G	1	1	1	1	1	1	17	9	10	18	6	13	0	0.25	0.941176	0.478261	0	0.583333	1	0	0	0.571429	0.302326	0
5854871	T	C	C	C	C	C	C	0.416667	1	1	1	1	1	12	22	39	60	20	76	0	1	0.538462	0.432432	0.44	0.565217	0	0.567568	0	0	0	0
64695109	G	C	C	C	C	C	C	1	1	1	1	1	1	12	7	4	8	10	4	0.454545	1	0.363636	1	0	0	0	0.47619	0	0.5	0	0.333333
31795181	T	C	C	C	C	C	C	1	0.681818	0.458333	0.45	0.6875	0.52	38	22	24	20	16	25	0	0	0.555556	0	0	0.8	0.571429	0	0	0	0	0
68279007	T	C	C	C	C	C	C	0.424242	0.75	0.428571	0.444444	0.368421	0.454545	33	8	7	9	19	11	0	1	0	0	0	0	0	0	0	0	0	0
98883826	C	T	T	T	T	T	T	1	0.526316	1	1	1	0.675676	31	38	10	31	28	37	0	1	0	0	0.571429	0	0	0	0.545455	0.454545	0.571429	0.2
4822302	C	T	T	T	T	T	T	0.555556	0.2	1	0.809524	1	1	9	10	4	21	7	18	0	0	0	0	0.333333	0.666667	0.625	0	0.5	0	0.4	0.181818
23661188	C	T	T	T	T	T	T	1	1	1	1	1	1	12	6	6	12	5	3	1	0	0	0	1	1	0.666667	0	0	0.47619	0	0
31738259	C	T	T	T	T	T	T	1	1	1	1	1	1	27	24	26	32	26	20	1	0	0.727273	0	0.416667	0.428571	0.5	0	0.6875	0	0	0.384615
15410124	G	A	A	A,T	A	A	A	1	0.464286	1	1	1	0.214286	18	28	14	21	2	14	0	1	0	0	0.727273	0	0	0	0.25	0.846154	0	0
35843183	C	T	T	T	T,G	T	T	0.266667	0.5	1	1	1	1	15	16	6	7	4	16	0	0	0	0.8	1	0	0.461538	0	0	0	0	0.652174
43804823	C	T	T	T	T	T	T	0.875	1	0.833333	1	1	0.75	8	4	6	5	4	4	0	0.75	0	0	0	1	0	0	0	0.857143	0	1
114038406	C	G	G	G	G	G	G	0.158824	0.184713	0.923077	0.75	0.277778	1	170	157	13	48	90	23	0	0	0	0	0	0	0	0.444444	0	0	1	0
100483439	T	C	C	C	C	C	C	0.277778	0.5	0.714286	0.4	0.5	1	18	12	14	15	18	45	0	0	0.545455	0	0	0	1	0	0	0	0	0
49526831	A	G	G	G	G	G	G	1	1	0.846154	1	1	0.75	15	6	13	4	4	4	0	0	1	1	0	1	0	0	0	0.75	0	0
6042774	G	C	C	C	C	C	C	1	1	1	1	1	1	16	17	9	27	16	40	0	1	0.545455	0.454545	0.47619	0.9	0	0.777778	0	0	0	0
100549404	C	T	T	T	T	T	T	1	1	0.969072	1	1	0.57561	205	119	97	177	130	205	0.368421	1	0	0	0.431373	1	0	0	0.421053	0.478261	0	0
86684444	G	A	A,T	A	A	A	A	0.263158	1	1	1	0.666667	0.625	19	5	35	39	6	8	1	0	1	0	0	0	0	0.555556	0.153846	0	0	0
35051035	C	A	A	A	A	A	A	1	1	0.928571	1	1	1	9	8	14	16	3	2	1	0	0.25	0	0	0	0	1	0	0	0.833333	1
769	C	A	A	A	A	A	A	1	0.261538	1	1	1	1	2	65	4	2	1	1	0.25	0	0.5	1	0	1	0	0	0.666667	0	0	0
769	C	A	A	A	A	A	A	1	0.261538	1	1	1	1	2	65	4	2	1	1	0.25	0	0.5	1	0	1	0	0	0.666667	0	0	0
77513748	G	C	C	C	C	C	C	0.173913	0.368421	1	1	0.354839	0.953488	46	19	28	31	31	43	0	0.428571	0	0.578947	0	1	0	0	0	0	0	0
20574430	C	G	G	G	G	G	G	0.366667	1	1	1	1	0.6	30	12	9	22	18	10	0.6	0.428571	0	0	0.375	0	0	0.692308	0	0.444444	0	0.583333
78647143	T	G	G	G	G	G	G	1	1	1	1	1	1	25	23	25	46	27	54	0	0	0	0.457143	0	0	0	1	0.7	1	1	0
42315887	C	G	G	G	G	G	G	0.34	0.590909	1	1	0.444444	0.518519	50	44	12	36	27	54	0	1	0	0.515152	0.538462	0	0	0	0	0	0	0
17216985	A	G	G	G	G	G	G	1	1	1	1	0.571429	1	15	8	4	26	7	14	0	0.333333	1	0.5	1	0	0.5	0	0	0	0.4	0
109708413	T	C	C	C	C	C	C	0.222222	0.225806	0.55	0.575758	0.166667	0.642857	9	31	20	33	12	28	0	0	0.545455	0	0	0	0	0	0	0	0	0
265821	C	T	T	T	T	T,G	T	0.3	0.695652	0.666667	0.8	1	0.375	10	23	6	5	15	8	0	0.666667	0	0	0.666667	0	0	0.333333	0	0	0.333333	0
32612989	G	A	A	A	A	A	A	0.318182	0.421053	0.243902	0.210526	0.666667	0.375	22	38	41	19	9	32	0.4	0	0	0	0	0	0	0	0	0	0	0
99909379	C	T	A	T	T,A	T,A	T,A	0.5	1	0.833333	0.8	0.833333	0.868421	6	2	6	10	6	38	0	0	0	0	1	1	0	0	0	0	1	0
65513301	A	T	T	T	T	T	T	0.307692	0.8	0.571429	0.222222	1	1	13	5	7	9	2	2	0	0	0	0.666667	0	0.4	0	0	0	0	0	1
22401677	C	T	T	T	T	T	T	1	0.965517	1	0.96	1	1	45	29	15	50	23	89	0.285714	0.25	1	0.555556	1	1	0	0	0	0	0	0
5855726	C	A	A	A	A	A	A	0.606061	1	0.975	1	1	1	33	6	80	84	34	74	0	1	0.466667	0.5625	0.446043	0.6	0	0.671642	0	0	0	0
94574351	G	A	A	A	A	A	A	1	0.5	1	1	0.5	1	13	4	4	12	6	2	0	0	1	1	0	0	0	0	0	0.5	0.666667	0
43697572	C	G	G	G	G	G	G	1	1	1	1	1	0.5	14	11	16	12	3	18	0	0	0.666667	0	0	1	0	1	1	0	0	0
84976550	A	T	T	T	T	T	T	0.666667	1	1	1	0.25	1	3	4	9	11	8	7	0	0	0.666667	0.75	0	0	0.666667	0	0	1	0	0
74873801	A	G	G	G	G	G	G	0.777778	0.5	0.857143	0.666667	1	0.428571	9	4	7	3	5	14	0	0.5	0.666667	0.375	0	0	0	0	0	0.555556	0.3	0
6288108	C	T	T	T	T,A	T	T	0.857143	1	0.95122	0.935484	1	0.893617	7	15	41	62	13	47	0	0.916667	0	0	0	0	0	1	0	0	1	0.888889
25472241	C	A	T	T	T	T	T	0.412658	1	1	1	1	0.590698	395	130	92	71	128	215	0.34375	1	0.356164	0.441558	0.574713	0.456311	0	0	0	0	0	0
77256037	A	T	T	T	T	T	T	1	1	1	1	1	0.4	2	3	4	2	6	5	0	0	1	0	0	0	1	0	0	0	1	0.571429
140188888	G	C	C	C	C	C	C	0.538168	1	0.983871	0.992188	0.513158	0.836735	262	143	62	128	76	49	0.344828	1	0.293478	0.409836	0	0.987805	0	0	0	0	0	0
53685169	C	T	T	T	T	T	T	0.377778	0.52	0.894737	0.863636	0.166667	0.962963	45	50	19	22	30	27	0	0	0.27907	0	0.9	0	0.352941	0.428571	0	0	0	0
6042936	G	A	A	A,C	A	A	A	0.2	1	1	0.964286	1	1	10	14	8	28	13	21	0	1	0.666667	0.4	0.272727	1	0	0	0	0	0	0
46612010	T	C	C,G	C	C	C	C	1	1	0.983051	0.897959	0.956522	0.9	79	63	59	49	46	40	0.974684	0	0.967949	0	1	0	0	0	0	0	0	0.971429
44720252	G	A	A	A	A	A	A	0.410714	0.333333	0.882353	0.809524	0.55	0.636364	56	6	17	21	20	11	0	0	1	0.8	0	0	0	0	0	0	0	0
57340872	G	A	A	A,C	A	A	A	0.789474	0.571429	1	1	1	1	19	7	17	41	6	37	0	0.681818	0	0	0	0.5	0	1	0	0.357143	1	0
59965842	G	A	A	A	A	A	A	1	1	0.511111	0.4	0.833333	0.394737	28	55	45	70	6	38	0.222222	0.428571	0	0	0	0	0	1	0.666667	0	0	0
36199756	T	C	C	C	C	C	C	0.45	1	0.571429	0.8	1	1	20	20	7	15	9	7	0	0	0	1	1	0	0	0	0	0	0	1
27091591	T	C	C	C	C	C	C	0.58011	0.641667	1	1	1	0.6	181	120	43	103	68	55	0.441558	0.468354	0	0	0	0	0	0.515789	0.591837	0.514851	0.468354	0
9832164	G	C	C	C	C	C	C	1	1	1	1	1	0.444444	14	14	9	23	15	9	0	0.625	1	0	0	1	0	1	0	0	0	0
78877638	T	C	C	G	C	C	C	1	0.875	0.5	0.857143	0.444444	0.642857	11	8	4	14	9	14	0	0	1	0	0	1	0	0	0	0	0	0.5
21616087	T	C	C	C	C	C	C	0.3	0.666667	0.3	0.444444	0.75	0.571429	10	6	10	9	4	7	0	0	0.5	0	0	0	0.714286	0	0	0	0	0
28271070	A	G	G	G	G	G	G	1	1	1	1	1	1	10	3	5	5	12	11	0	1	0.545455	0	0	0	0	1	0	0.636364	1	0
26529234	T	C	C	C	C	C	C	1	1	1	0.882353	0.857143	0.375	2	2	3	17	7	24	0	0	0	0	0.666667	0	0.8	0.5	0	1	0.333333	0
66880117	T	C	C	C	C	C	C	1	1	1	1	1	1	13	4	7	5	4	4	0	0	1	1	0	1	0	0	0	0	0.1875	1
20946677	G	A	A	A	A	A	A	1	0.3	0.5	0.583333	1	1	3	10	4	12	7	11	1	0	0.571429	0	1	0	0	0	0	0	0	0
23687131	C	T	T	T	T	T	T	0.492188	1	0.344828	0.328125	1	1	128	94	29	64	73	101	0.464286	0.978261	0	0.368421	0	0	0	0.544118	0	0	0	0
155005354	C	G	G	G	G	G	G	1	1	0.5	0.894737	0.4	0.468085	34	17	16	19	25	47	0	0	0	0	0.4	1	0	0.266667	0	0	0.230769	0.555556
23686806	G	A	A	A	A	A	A	0.408333	1	0.333333	0.44	1	1	120	50	60	75	63	129	0.315789	1	0	0.635294	0	0	0	0.421053	0	0	0	0
119151239	A	G	G	G	G,T	G	G	1	1	1	1	0.666667	1	6	14	5	12	3	3	0.857143	0	0	0	0	0	1	0	1	0	0	1
27692744	G	T	T	T	T	T	T	0.833333	0.285714	0.642857	0.7	0.5	0.538462	6	7	14	30	6	13	0	0.692308	0	0	0	0	0	0	0	0	0	1
67798897	T	C	C	C	C	C	C	1	1	1	0.941176	1	1	11	6	7	17	8	12	0	0	0.333333	1	0	0.8	0	0	1	0	0	1
39180851	A	G	G	A	A	A	G	1	1	0.24	0.567164	0.5	1	2	2	25	67	26	2	0	0	0	0	0	0	1	0	0.5	1	0	0
26747349	A	G	G	G	G	G	G	0.73913	0.56	0.984127	1	1	0.581081	115	100	63	142	106	74	0	0.651376	0.536424	0	0.716814	0.578431	0	0	0	0	0.576389	0
28615119	C	T	T	T	T	T	T	0.666667	1	1	1	1	0.666667	6	5	12	3	5	6	0.6	0	0	1	0	0	0	0	0	0.5	1	0.428571
53682333	T	C	C	C	C	C	C	0.439024	0.6	1	1	0.269231	1	41	20	15	12	26	12	0	0	0.40625	0	1	0.5	0.6	0	0	0	0	0
82344079	G	A	A	A	A	A	A	0.444444	0.3125	0.538462	0.275862	0.333333	0.47619	27	16	13	29	9	21	0	0	0	0.578947	0	0	0	0	0	0	0	0
17323618	T	C	C	C	C	C	C	0.583333	0.615385	1	1	0.6	1	12	13	2	8	10	4	0	0	0	0	0	0	1	0	0	0	1	1
67795803	C	T	T	T	T	T	T	1	1	1	1	1	1	4	4	2	11	9	15	0	0	0.538462	1	0	0	0	0	1	0.666667	0	1
46611986	T	C	C	C	C	C	C	1	1	0.984127	0.875	0.955556	0.925	76	56	63	40	45	40	1	0	0.974026	0	1	0	0	0	0	0	0	0.971429
28562640	A	C	C	C	C	C	C	0.975	0.96	0.92	1	0.956522	1	80	25	25	43	46	90	0.122449	0.945946	0.525	0.564103	0	0.528571	0	0.9	0	0	0	0.432099
5860554	T	C	C	C	C	C	C	0.333333	1	1	0.974359	0.959184	1	21	15	201	234	49	218	0	0.935484	0.455026	0.457447	0.44	0.626667	0	0.563025	0	0	0	0
98100339	G	A	A	A	A	A	A	1	1	0.846154	0.942857	1	1	2	3	13	35	5	7	1	0	1	1	0	0	1	0	0	0	0	0
26747237	C	T	T	T	T	T	T	0.727273	0.6	1	1	1	0.645161	66	75	63	100	55	31	0	0.709677	0.607143	0	0.683673	0.561644	0	0	0	0	0.621622	0
86682242	A	G	G	G	G	G	G	0.714286	1	1	1	1	1	7	11	5	22	3	8	1	0	0.5	0	0	0	0	1	0.5	0.428571	0.5	0
6800889	T	G,A	A	A	A	A	A	1	0.428571	0.933333	0.969697	1	0.361702	8	7	15	33	3	47	0	0	0	0.5625	0	0	0	0	0.571429	0.352941	0.969697	0.45283
98100320	A	C	C	C,T	C	C	C	1	1	0.941176	0.840909	1	1	2	4	17	44	6	7	1	0	1	1	0	0	1	0	0	0	0	0
5705997	G	T	T	T	T	T	T	1	0.777778	0.962963	0.837838	0.75	1	12	9	27	37	4	10	0	0	0	0	0	0	0	0.941176	0	0.8	0.888889	0.916667
51118776	C	T	T	T	T	T	T	0.666667	1	1	1	1	1	3	3	2	17	3	3	0	0	0.857143	1	1	0	0	0.777778	0	0	0	0.25
8232113	G	A	A	A	A	A	A	1	0.5	0.75	0.777778	0.642857	0.730769	25	10	4	9	14	26	0	0	0.363636	0.6	0	0	0.363636	0.545455	0	0	0	0.75
26747252	C	G	G	G	G	G	G	0.720588	0.597403	1	1	1	0.625	68	77	71	110	62	32	0	0.703125	0.598291	0	0.695238	0.573333	0	0	0	0	0.596491	0
290846	G	A	A	A	A	A	A	1	0.5	1	1	1	0.75	12	4	5	15	3	4	0.2	1	0	0.4	1	0.875	0	0	0	0	0	0
9157575	A	G	G	T	T	G	G	1	0.666667	1	1	1	0.875	101	24	3	3	33	8	1	0.478261	0	0	0.5	0	0.789474	0	0	0	0.666667	0.333333
1639610	T	C	C	C	C	C	C	1	0.857143	0.666667	0.555556	1	1	2	14	6	9	8	7	0	0	1	0.555556	1	0	0.75	0	0	0	0	0
6088446	A	C	C	C	C	C	C	0.5	0.9	0.421053	0.710526	0.5	0.73913	6	10	19	38	8	23	0	0	0	0	0	0	0	1	0	1	0	0
34285243	G	A	A	A	A	A	A	0.421053	1	0.425532	0.481618	0.979167	0.514706	285	289	94	272	144	204	0	0.568182	0.483871	0	0	1	0	0	0	0	0	0
29150779	T	C	C	C	C	C	C	0.396947	0.554455	0.60274	0.528455	0.333333	0.177778	131	101	73	123	51	45	0	0	0	0	0	0	0	0	0	0.275862	0.235294	0.312977
6086313	G	A	A	A	A	A	A	0.48	0.611111	0.52381	0.905882	0.809524	0.971831	50	18	21	85	21	71	0	1	0.2	0	0	0	0	1	0	0	0	0.333333
10989212	A	G	G	G	G	G	G	0.465649	0.987179	0.509259	0.4329	1	0.368421	262	78	108	231	102	114	0	0.362069	0	0	0.484848	0	0	0.684211	0	0	0	0.463636
15467505	G	C	C	C	C	C	C	1	1	0.166667	0.5	1	0.923077	28	29	18	14	16	13	0	1	0	0	1	0	0	0	0	0.25	0	0.571429
32185874	G	A	A	A	A	A	A	0.523077	0.64	0.297872	0.632653	0.333333	1	65	25	47	49	12	103	0.7	0	0.409091	0.25	0	0	0	0	0	0	0.3	0
66845291	T	C	C	C	C	C	C	1	1	0.75	0.727273	1	1	13	4	4	11	18	19	0	0.153846	0.5	0.857143	0	0.625	0.6	0.5625	0	0	0	0.411765
5853917	A	G	G	G	G	G	G	0.619048	1	1	1	1	1	21	7	19	46	3	71	0	1	0.59375	0.352941	0.473684	0.588235	0	0.84375	0	0	0	0
99918730	T	C	C	C	C	C	C	1	1	1	1	1	1	5	6	7	7	14	13	1	0	0.5	0	1	0	0	1	0.733333	0	0	0
52212325	G	A	A	A	A	A	A	1	0.6	0.5	1	1	1	4	5	4	4	3	2	0	0	1	0.333333	1	0	1	0	0	0	0	0
21028602	G	A	A	A	A	A	A	0.409091	0.555556	1	1	1	1	22	9	3	6	3	7	0	0.555556	1	0	0.5	0	0	0.714286	0	0	0.428571	0
6801850	T	C	C	C	C	C	C	1	0.3	1	1	0.733333	0.386364	7	10	11	47	15	44	0	0	0	0.516129	0	0	0	0	0.533333	0.210526	0.980392	0.413793
65618073	G	T	T	T	T	T	T	0.636364	0.735294	0.666667	0.833333	0.793103	0.8	33	34	12	30	29	15	0	0	0.7	0	0	1	0	1	0	0	0	0
27186334	G	A	A	A	A	A	A	0.998041	0.421131	0.41	0.495504	1	0.456522	1021	1344	500	1112	655	736	0	0	0.540839	0.47619	0	0	0	0	0	0	0	1
22803938	T	G	G	G	G	G	G	0.741935	1	1	1	1	1	31	21	24	36	14	21	0	0	0	0	0	0.8	0.75	0.428571	1	0	0	1
25585913	T	C	C	C	C	A,C	C	0.578947	1	1	1	1	1	38	10	3	11	7	14	0	1	0.666667	0.75	0	0	0	0	0	0.4	0	1
47319599	A	G	G	G	G	G	G	1	1	0.857143	0.571429	1	1	3	9	7	7	2	9	0	0	0	0	0	0	0	1	0.666667	1	0	1
32184381	T	G	G	G	G	G	G	0.515152	0.666667	0.550459	0.653153	0.662162	1	165	105	109	222	74	201	0.410256	0	0.581633	0.561404	0	0	0	0	0	0	0.732877	0
25049698	G	C	C	C,A	C	C	C	1	0.666667	1	1	0.571429	1	32	3	21	40	7	21	0	1	0	0.166667	0	0	0.866667	0.566667	0.4	0	0.478261	0
78647198	C	G	G	G	G	G	G	1	1	1	1	1	1	39	31	34	55	24	53	0	0	0	0.464286	0	0	0	1	0.777778	1	1	0
6122945	C	T	T	T	T	T	T	0.615385	0.666667	0.952381	0.967742	0.857143	1	39	27	21	62	7	38	0	1	0	0	0	0	0	0.8	0	0.5	0.413793	0.588235
26729761	T	C	C	C	C	C	C	0.4	1	0.4	0.4	0.555556	1	5	6	5	15	9	3	0	0	1	0	0	0	0	0	0	0	0	1
146857131	A	G	G	G	G	G	G	1	0.45	0.833333	0.75	1	0.434783	31	20	6	12	7	23	0.4	0	0	0	1	0.666667	0	0	0.647059	0	0	0
86768372	T	G	G	G	G	G	G	0.526471	0.991848	0.634043	0.577922	1	0.47619	340	368	235	308	204	189	0.195652	0	0	0	0	0	0	0.475962	0.631579	0.579832	0.570707	0
4149871	G	C	C	C	C	C	C	0.39823	1	1	1	0.482143	1	113	85	35	59	56	15	0	0	1	0.714286	1	0	0	0.413793	0	0	0	0
18416388	T	C	C	C	C	C	C	0.4	0.4	0.571429	0.6875	0.736842	0.5625	5	10	7	16	19	16	0.3	0.5	0.5	0	0	0	0	0	0	0	0	0.307692
43550439	A	G	G	G	G	G	G	0.411765	0.857143	0.714286	0.666667	0.727273	0.55102	17	7	7	33	11	49	0	0.555556	0	0.4	1	0	0	0	0	0	0	0.222222
39730911	T	G	G	G	G	G	G	0.878788	0.3125	0.961538	0.9	1	0.580645	33	16	26	40	49	31	0	1	0	0.759259	0	0	0	0	0.342593	0.78125	0	0
69621011	G	C	C	C	C	C	C	1	1	0.75	1	1	1	38	33	4	47	22	13	1	0	0	0	1	0	1	0	0	0	0	1
37461	C	G	G	G	G	G	G	1	1	1	1	1	0.75	7	3	4	8	2	4	1	0	0	0	0	0	0	0	0	1	1	1
112710249	A	T	T	T	T	T	T	1	1	0.5	0.666667	1	1	6	5	4	6	12	5	0.666667	0	0	0	1	1	0	0	0	0	0	0.75
28706790	C	G	G	G	G	G	G	1	0.692308	0.5	0.333333	1	1	2	13	12	12	7	7	0.6	0	0	0	1	0	0.62069	0.555556	0	0	0	0
34290952	C	T	T	T	T	T	T	0.542373	1	0.33945	0.502242	0.990826	0.341463	177	177	109	223	109	82	0	0.428571	0.539326	0	0	1	0	0	0	0	0	0
6095677	A	C	C	C	C	C	C	0.453271	0.942623	0.877165	0.882006	0.815	0.991935	428	244	635	1017	200	620	0	1	0	0	0	0	0	0.937743	0	0.562914	0.314286	0.398964
62955554	T	G	G	G	G	G	G	1	1	0.8	0.444444	0.5	1	4	3	10	18	10	17	0	0	0	0	1	1	0	1	0	0	0	0
9127815	C	A	A	A	A	A	A	1	1	1	1	1	0.6	14	4	2	2	2	5	0	0.666667	0	0	1	0	0	0	0	0.857143	1	0.333333
41687073	G	A	A	A	A	A	A	0.571429	0.47619	0.857143	0.777778	1	0.434783	14	21	7	18	19	23	1	0	1	0	0	0.375	0	0	0	0	0	0
14763882	A	G	G	G	G	G	G	0.410256	0.407407	1	1	0.689655	0.34375	78	54	33	41	29	32	0	0	0	0	0.972222	0.578125	0	0	0	0	0.558824	0
35196630	A	T	T	T	T	T	T	0.525773	1	0.583333	0.671429	0.981132	0.339286	97	50	24	70	53	112	0	0	0	0.363636	0	0	0	0.413793	0	0.666667	0.516129	0.4
14904997	A	G	G	G	G	G	G	0.3	0.416667	0.857143	0.833333	1	1	10	24	7	6	6	2	0	0	0	0	0	0	1	1	0	0	0.666667	0
113761350	T	G	G	G	G	G	G	1	0.75	1	1	0.357143	0.714286	26	36	5	30	14	7	0	1	0.526316	1	0	0	0	0	0	0.555556	0	0
23686081	G	A	A	A	A	A	A	0.216216	1	0.388889	0.446809	1	1	37	13	18	47	12	49	0	1	0	0.5625	0	0	0	0.75	0	0	0	0
6664450	C	T	T	T	T	T	T	1	1	0.571429	0.166667	1	1	6	5	14	18	2	13	0	0	1	0	0	0	0	0	1	0	0	1
10080346	C	T	T	T	T	T	T	1	1	1	1	1	0.583333	6	5	6	14	5	12	1	0	0.428571	0.75	0	1	0	0	0	0.666667	0	0
37993765	T	G	G	G	G	G	G	0.897436	0.928571	0.933333	1	0.45	1	39	28	15	33	40	35	0	0.415094	0.977778	0	0.44898	0	0.941176	0	0.357143	0	0	0.333333
40489997	T	C	C	C	C	C	C	1	0.285714	1	1	1	1	6	7	2	7	6	10	0	0	1	0	0	0	1	0.75	0	0	0	0.8
28314627	G	C	C,A	C,A	C	C	C	0.39726	1	1	1	1	1	146	95	109	107	59	69	0	0	0.462687	0	0	0	0.236364	0	0.4375	0.526316	1	1
57159172	A	C	C	C	C	C	C	1	1	1	1	1	0.4	4	2	2	8	2	10	1	0	0	0	0	0	0	0	1	0	1	0.666667
29922943	A	T	T	T	T	T	T	1	1	1	1	1	1	5	4	6	2	2	12	0	0	0.666667	0	1	0	0	1	0	0.6	1	0
75680826	C	T	T	T	T	T	T	1	1	1	1	1	1	10	15	2	12	5	16	0	1	0.4	0.421053	0.375	0	0	0	0.2	0.571429	1	0.3
32184192	A	G	G	G	G	G	G	0.667286	0.633741	0.658485	0.668179	0.703704	1	1614	1144	937	1543	837	976	0.797778	0	0.485019	0.618205	0	0	0	0	0	0	0.698171	0
27079362	A	C	C	C	C	C	C	0.857143	1	1	1	0.8125	0.583333	28	17	30	43	16	12	1	0	0.4	0.121212	1	1	0	0	0	0	0	0
140120650	C	T	T	T	T	T	T	1	1	0.8	0.777778	1	0.666667	12	9	5	9	6	6	0	0	1	1	0.8	0	0.714286	0	0	0	0	0
15467121	A	G	G	T	G	G	G	1	1	0.4	0.9	1	0.285714	19	10	5	20	15	21	0	1	0	0	0.857143	0	0	0	0	0	0	1
845495	T	C	C	C	C	C	C	1	1	1	1	1	1	41	32	21	48	48	28	0.8125	0.571429	0	0.225806	1	1	0.380952	0	0	0	0	0.28125
56232159	G	A	A	A	A	A	A	0.5375	0.6	0.315789	0.481481	0.457143	0.407407	80	40	76	81	35	27	0	0	0.361111	0.291667	0	0	0	0	0	0	0	0.419355
104310926	T	C	C	C	C	C	C	0.633803	0.990566	0.314815	0.542857	1	0.605263	71	106	54	70	33	76	0	0	0	0.537313	0.846154	0.478261	0	0	0	0.5	0	0
22401701	A	G	G	G	G	G	G	1	0.933333	1	1	1	1	42	30	19	54	16	71	0.285714	0.333333	1	0.59375	1	1	0	0	0	0	0	0
37561951	G	A	A	A	A	A	A	0.62963	0.5	0.466667	0.413793	0.414634	0.42029	81	46	15	58	82	69	0	0.56	0	0	0.565217	0	0	0	0	0	0	0
89131144	T	C	C	C,G	C	C	C	0.588235	0.75	1	0.8	0.68	1	34	12	3	5	25	10	0	0	0.470588	0.5	1	0.166667	0.714286	0.25	0	0	0	0
127891046	A	G	G	G	G	G	G	0.380952	1	0.5	0.5	1	1	42	9	4	8	6	10	0	1	0	0	0	1	0	0.666667	0	0	0	0
4824747	G	T	T	T	T	T	T	0.5	0.55	0.526316	0.515152	1	1	20	20	19	33	11	17	0	0	0.545455	0	0.708333	0	0.875	0	0.25	0	0	0
47067988	T	C	C	C	C	C	C	0.24	0.461538	0.307692	0.28	0.130435	0.666667	25	13	13	25	23	3	0	0	0	0	0	0.375	0	0	0	0	0	0
23233550	A	G	G	G	G	G	G	1	0.444444	0.6	0.666667	0.333333	0.227273	40	18	15	27	24	22	0	1	0.5625	0	0	0	0	0	0	0	0	0
62271516	G	A	A,T	A	A	A	A	1	1	1	1	1	1	4	7	4	14	2	16	0	0	0	1	0	1	1	0	0	0	0.75	0.545455
82035226	G	A	A	A	A	A	A	0.375	0.333333	1	1	0.461538	1	16	6	17	15	13	14	0	0	0.222222	0.944444	0.5	0.8	0	0	0	0	0	0
116354459	G	A	A	A,T	A	A	A	1	0.375	1	1	1	0.714286	2	32	19	25	3	7	1	0	1	0	0	0	0	0	0.785714	0.25	0	0.352941
96364667	G	A	A	A	A	A	A	1	1	1	1	0.5	1	2	9	3	20	8	4	0	0	0.8	1	1	0	0	0	0	1	0	0
5134299	A	G	G	G	G	G	G	1	1	1	1	1	1	6	9	5	8	4	15	0	0	0.5	0	1	0	1	0	0.8	1	0	0
844166	A	G,T	G	G	G	G	G	1	1	1	1	1	1	11	6	5	4	2	2	0	1	0	0.5	1	1	0	0	0	0	0	0.8
6122272	A	C	C	C	C	C	C	0.391501	0.660194	0.534052	0.659411	0.642691	0.742838	5295	5150	6123	6386	3017	4538	0	0.494256	0	0	0	0	0	0.465527	0	0.246121	0.352253	0.374755
10099682	T	C	C	C	C	C	C	1	1	1	1	1	1	9	19	36	34	16	37	0	0.666667	0.636364	1	1	1	0	0	0	0	0	0
63005893	A	G	G	G	G	G	G	0.625	1	0.416667	0.25	0.4	0.166667	8	2	12	12	10	12	0	0.333333	0.5	0	0	0	0	0.333333	0	0	0	0
28473195	C	T	T	T	T	T	T	1	1	1	1	1	0.857143	6	11	6	10	8	7	0	0	1	1	1	0	0	0.5	0.666667	0	0	0
66571358	C	T	T	T	T	T	T	0.6	0.4	0.601594	0.489474	1	0.510109	255	180	251	190	228	643	0	0	0	0	1	0.453988	0	0	0	0	0	0.458213
87966384	G	C	C	C	C	C	C	1	0.488889	0.981132	0.944444	1	0.506173	90	90	53	108	59	81	0	0.52	0	0	0	0.5	0.724138	0.318182	0.52381	0.647059	0	0
117916210	A	G	G	G	G	G	G	0.454545	0.384615	1	1	0.7	1	11	13	2	8	10	10	0	0	0.833333	0.454545	0	1	0	0	0	0	0	0.566667
6258154	G	A	A	A	A	A	A	0.733333	1	1	1	0.2	0.875	15	8	2	4	10	8	1	0	1	0	0.625	0	0	0	0	0.5	0	0
99730816	G	A	A	A	A	A	A	0.53125	1	1	1	1	1	32	22	4	6	2	2	1	0	0	0.35	1	1	0	0	0	0	0	0.5
844204	A	G	G	G	G	G	G	1	1	1	0.8	1	1	9	3	5	5	4	4	0.5	0	0	0	1	1	0.5	0	0.285714	0	0	0.833333
21436331	C	T	T	T	T	T	T	0.28125	0.541667	0.875	1	0.588235	0.583333	32	24	16	31	17	36	0	1	0	0	0.727273	0	0	0	0	0	0.461538	0
18287200	A	T	T	T	T	T	T	0.645161	0.428571	0.5	0.416667	0.75	0.166667	31	7	6	24	16	12	0	0.5625	0.193548	0.277778	0	0	0	0	0	0.194444	0	0
69275811	C	T	T	T	T	T	T	0.928571	1	1	1	1	1	14	2	2	10	3	6	0.5	0	0.4	0.545455	0.5	0.5	0.571429	0	0	0	0.5	0.733333
169	A	G	G	G	G	G	G	1	1	0.99845	0.986111	1	1	344	380	645	576	327	570	1	1	0	0	0	0.990888	0.98998	0	0	0	0	0.333333
89838815	T	G	G	G	G	G	G	0.384615	0.25	1	0.857143	1	0.5	13	8	2	14	5	12	0	0	0	0.75	1	0.571429	0	0	0	0	0	0
26894070	A	G	G	G	G	G	G	1	0.461538	0.666667	0.5	1	0.333333	5	13	6	10	4	6	0	0	0.555556	0	0	0.75	0.2	0.5	0	0	0	0.285714
6801823	C	G	G	G	G	G	G	1	0.2	1	0.979167	0.833333	0.454545	4	15	11	48	12	55	0	0	0	0.515152	0	0	0	0	0.652174	0.166667	1	0.462963
49371886	T	C	C	C,A	C	C	C	1	1	1	1	0.857143	1	2	3	9	16	7	8	0	0	1	1	0	1	0	0.6875	0	0	0.5	0
29369034	T	C	C	C	C	C	C	0.4375	0.777778	0.636364	0.55	0.352941	0.387097	16	9	11	20	17	31	0	1	0	0.473684	0	0	0	0	0	0	0	0
60235475	C	T	T	T	T	T	T	1	1	1	0.666667	1	1	3	2	3	6	2	4	0	0	0	1	1	0	0	0	1	1	0	0
24970441	G	A	A	A	A	A	A	1	1	1	1	0.666667	1	5	2	1	2	3	2	0	0	1	0	0	1	0	1	0	0	0	1
51536089	A	C	C	C	C	C	C	1	1	1	1	0.666667	1	2	3	2	2	3	2	0	0	1	0	0	1	0	1	0	0	0	1
43033907	A	C	C	C	C	C	C	1	1	1	1	1	0.666667	5	4	3	2	2	3	0	0	0	1	0	0	1	0	0	1	0	1
81102702	T	C	C	C	C	C	C	1	1	1	1	0.666667	1	11	3	2	7	6	8	0	0	1	0	0	0	1	0	0	0	1	1
31982374	C	A	A,T	A	A	A	A	0.666667	1	1	1	1	1	3	6	2	7	2	8	0	0	0	1	0	0	0	1	0	0	1	1
95463484	A	T	T	T	T	T	T	0.4	1	0.3	0.538462	0.4	0.416667	20	26	10	26	5	12	0.590909	0	0	0	0.285714	0	0	0	0	0	0	0.516129
7532476	C	T	T	T	T	T	T,G	0.493671	0.448276	0.655172	0.595745	1	1	79	58	29	47	31	12	0.222222	1	0.381818	0	0	0.477273	0.449275	0	0	0	0	0
27698392	G	T	T	T	T	T	T	1	0.8	0.666667	0.555556	0.888889	0.75	6	5	9	9	9	28	0	0	0	1	0	0	1	0	0	0	0	1
32186426	C	T	T	T	T	T	T	0.559322	0.448276	0.285714	0.372549	0.375	1	59	29	63	102	24	70	0	0	0.444444	0.615385	0	0	0	0	0	0	0.32	0
20567408	T	C	C	C	C	C	C	0.592593	1	1	1	1	0.714286	27	23	12	21	5	7	0.818182	0.466667	0	0	0.428571	0.333333	0	0.5	0	0.351351	0	0.75
71417538	G	C	C	C	C	C	C	0.5	1	1	0.961538	1	0.657895	18	23	7	26	25	38	0	0.705882	0.653846	0	0.785714	0	0.75	0	0	0	0	0.565217
6119333	T	C	C	C	C	C	C	1	0.375	1	0.825	0.8	0.641026	17	8	27	40	25	78	0	0.6	0.5	1	0.6	0	0	0	0	0	0.285714	0
70496363	T	A	A	A	A	A	A	0.833333	0.857143	0.555556	0.875	1	1	6	7	9	16	3	4	0.666667	0	0	0	0	1	1	0.8	0	0	0	0
39273420	A	G	G	G	G	G	G	0.185185	1	1	1	0.6	1	27	11	2	9	5	33	1	0	0	0.8	0	0	1	0	0	0	0	0.333333
15467756	G	A	A	A	A	A,C	A	1	0.945946	0.277778	0.586957	1	0.615385	28	37	18	46	14	13	0	1	0	0	1	0	0.4	0	0	0	0	0.375
86434763	A	G	G	G	G	G	G	1	1	1	1	0.666667	1	3	3	3	3	6	2	0	0	0.444444	0.857143	0.857143	0.571429	0	0	0	0	0.857143	0.428571
36160927	A	G	G	G	G	G	G	1	1	1	1	1	1	2	6	6	7	9	10	0	0.75	0	1	0	1	0	0.6	0	0	0	1
6041859	A	G	G	G	G	G	G	0.642857	1	1	1	1	1	14	14	34	74	43	77	0	1	0.342857	0.6	0.714286	0.7	0	0.636364	0	0	0	0
6119078	A	T	T	T	T	T	T	0.777778	0.5	0.421053	0.540541	0.818182	0.589744	18	8	19	37	22	78	0	0	0	1	0	1	0	0	0	0	0	0
10425581	C	G	G	G	G	G	G	0.235294	1	0.444444	0.363636	1	1	17	3	9	11	5	4	0	1	0	0	0	0	0	0	0	0.4	0	1
140188768	A	G	G	G	G	G	G	0.523132	1	1	1	0.418919	0.671429	281	196	79	125	74	70	0.300971	1	0.257426	0.412698	0	1	0	0	0	0	0	0
11441206	T	C	C	C	C	C	C	0.666667	0.482759	0.368421	0.607143	1	0.764706	15	29	38	28	9	17	1	0	0.8	0	0.285714	0	0	0.166667	0	0	0	0
6002843	C	A	A	A,T	A	A	A	0.777778	1	1	1	0.8	1	9	16	16	27	5	42	0	0	0	0	0	0	0	1	0	1	1	0.941176
61935185	A	T	T	T	T	T	T	0.992806	0.379888	0.505682	0.510345	0.984127	0.473333	139	179	176	145	63	150	0.423333	0	0	0	0	0	0	0	0.295302	0.505703	0.986207	0
44719525	C	T	T	T	T	T	T	0.5625	0.736842	0.5	0.615385	0.666667	0.5	16	19	4	13	12	4	0	0	1	0.333333	0	0	0	0.615385	0	0	0	0
23685299	C	T	T	T	T	T	T	0.5	1	0.571429	0.538462	1	1	26	12	7	26	15	28	1	1	0	0.522727	0	0	0	0.454545	0	0	0	0
47737195	T	A	A	A	A	A	A	0.714286	1	0.666667	1	1	1	7	2	3	3	6	2	0.75	0	0	0	1	0	1	0	1	0	0	0
22001450	A	G	G	G	G	G	G	0.5	0.5625	1	0.777778	1	1	4	16	2	9	2	5	0.5	0	0	0	0	0	0	0.3	0	0.555556	1	0.857143
8232109	A	G	G	G	G	G	G	1	0.5	0.6	0.777778	0.615385	0.703704	24	10	5	9	13	27	0	0	0.363636	0.636364	0	0	0.333333	0.545455	0	0	0	0.692308
16138359	A	G	G	G	G	G	G	0.866667	0.391304	0.434783	0.4375	1	0.666667	120	23	23	48	122	21	0	0	0	0.571429	0.666667	0.933333	0	0	0	0	0	0
103092493	G	A	A	A	A	A	A	1	1	1	1	1	0.625	21	5	5	14	19	8	0	0	0	0	0	0	1	1	0	1	0	1
5854950	G	A	A	A	A	A	A	0.238095	1	1	1	1	1	21	15	34	79	12	111	0	1	0.391304	0.545455	0.410526	0.586207	0	0.68	0	0	0	0
27213737	G	T	T	T	T	T	T	1	0.4	1	1	0.222222	1	4	10	2	11	9	2	0	1	1	0	0	1	0	0	0	0	0	0
52148635	G	T	T	T	T	T	T	0.763158	0.590909	0.6	0.382353	0.571429	0.5	38	22	15	34	21	12	0	0	0	0	0	0.461538	0.416667	0	0	0	0.409091	0.5
78012256	A	G	G	G	G	G	G	1	0.5	1	1	1	1	4	12	2	4	4	9	0	0	0	0.666667	0	0	1	1	0	0	0.714286	0.5
114324085	T	C	C	C	C	C	C	0.555556	0.263158	1	1	1	0.8	9	19	4	2	2	5	1	0	0	0	0	0	0	0	0	0	1	1
34776766	C	T	T	T	T	T	T	1	0.22335	0.268519	0.257511	0.336493	0.412281	92	197	108	233	211	114	0	0	0	0	0	0	0	0	0.340909	0.259259	0	0.281437
5861724	G	A	A	A	A	A	A	0.421053	1	1	1	0.733333	0.607595	19	14	58	89	30	79	0	0.921053	0.41791	0.292308	0.468208	0.5	0	0.547945	0	0	0	0
19163974	T	G	G	G	G	G	G	0.529412	0.666667	0.5	0.75	1	1	34	15	6	16	20	15	0	0	0	0.692308	0.5	0	0	0.428571	0	0	0.769231	0.444444
6039794	G	A	A	A	A	A	A	0.333333	0.552239	0.766667	0.798611	0.66129	0.754286	33	67	90	144	62	175	0	0.25	0.129032	0.285714	0.566667	0.36	0	0.666667	0	0	0	0
29993085	A	T	T	T	T	T	T	0.333333	1	0.375	0.5	0.285714	0.714286	6	6	8	12	7	7	0.6	0	1	0	0	0	0	0	0	0	0	0
57263496	A	G	G	G	G	G	G	0.612903	1	0.541667	0.526316	0.4	0.684211	31	27	24	38	10	19	0.333333	0	0	0	0	0	0	0.666667	0	0	0.625	0.534884
89838925	G	A	A	A	A	A	A	0.176471	0.25	1	1	1	0.642857	17	8	19	22	3	14	0	0	0	0.222222	1	0.6875	0	0.555556	0	0	0	0
6130593	T	C	C	C	C	C	C	1	1	1	0.875	0.444444	0.789474	2	4	5	24	9	19	0	0	0	0	0	0	0	1	0	1	0.705882	0.8
99319530	A	G	G	G	G	G	G	1	0.492537	1	1	1	0.65	65	67	19	43	27	20	0.533333	0.65	0.76	0	0	1	0.596491	0	0	0	0	0
44764576	G	T	T	T	T	T	T	1	0.571429	0.888889	0.875	1	0.266667	4	14	9	16	3	15	0	0	0	0	0	0	0	1	0	0	1	1
23251147	C	T	T	T	T	T	T	1	0.25	0.285714	0.285714	0.666667	0.48	9	8	14	14	15	25	0	0.666667	0.7	0	0	0	0	0	0	0	0	0
12725452	T	C	C	C	C	C	C	0.711538	0.45614	0.931034	1	0.527778	1	52	57	29	36	72	111	0.5625	1	0	0.478261	0.434783	0.55	0	0	0	0	0	0
76930715	G	A	A	A	A	A	A	1	1	1	1	1	1	8	12	2	4	7	8	0	1	0.4	1	0	0	1	0	0	0	0	1
39199048	G	A	A	A	A	A	A	1	1	1	1	1	1	24	32	47	49	15	19	0	0	1	0	0	1	0.4	0	1	1	0	0
44167605	G	A	A	A	A	A	A	1	1	1	1	1	1	2	2	4	12	3	7	1	0	0	1	0	0	0	0.4	1	0	0	1
75615764	C	A	A	A,T	A	A	C	0.6	1	1	1	1	1	5	5	6	3	6	2	0	1	1	0	0	1	0	1	0	0	0	0
93655473	C	T	T	T,A	T	T	T	0.7	0.545455	1	1	1	0.352941	20	11	12	19	2	17	0	0	0	0	0	1	0	0	0	0	1	1
85221639	C	T	T	T	T	T	T	1	1	0.727273	0.677419	0.6875	0.6	37	36	22	31	16	25	1	1	0.277778	0	0	0.818182	0	0	0	0	0	0
98031917	T	C	C	C	C	C	C	1	1	0.428571	0.666667	1	1	6	5	7	9	7	17	1	0	0	0.5	0	0	0	0	0	1	0.333333	0.666667
71417606	C	A	A	A	A	A	A	1	1	1	1	1	1	25	25	21	34	31	39	0	0.5	0.357143	0.121951	0.857143	0	1	0	0	0.571429	0	1
76776889	T	C	C	C	C	C	C	0.291667	1	0.666667	1	1	1	24	5	3	11	14	3	1	0	0.7	0	0	1	0	0	0	0	0	0.666667
71417646	A	G	G	G	G	G	G	1	1	1	1	1	1	27	33	32	55	41	51	0	0.5	0.517241	0	0.75	0	1	0	0	0.47619	0.166667	1
35198269	G	A	A	A	A	A	A	0.398601	1	0.557143	0.453704	1	0.398551	143	117	70	108	90	138	0	0	0	0.33871	0	0	0	0.492537	0.392405	0.283019	0.346154	0.365854
48921824	T	C	C	C	C	C	C	1	1	1	1	1	1	20	28	9	32	16	45	0	1	0	0.411765	1	1	0	0	1	0	0	0
4822487	G	A	A	A	A	A	A	0.285714	0.333333	0.730769	0.652174	1	1	7	24	26	23	7	20	0	0	0	0	0.625	0	0.4	0	0.5	0	0.888889	0
5854353	G	A	A	A	A	A	A	0.666667	1	1	0.913043	1	1	18	5	12	23	12	41	0	1	0.8	0	0.909091	0.285714	0	1	0	0	0	0
100478737	A	T	T	T	T	T	T	0.350365	0.54902	0.40625	0.351064	0.526316	0.953216	137	102	160	188	76	171	0.485294	0	0.37931	0	0	0	0.6875	0	0	0	0	0
28505369	C	A	A	A	A	A	A	0.205488	1	0.766344	0.803895	1	0.988048	3280	147	826	1489	867	251	0	0	0	0.349522	0	0	0.443576	0.421053	0.575758	0.392157	0	0.997895
37993526	T	A	A	A	A	A	A	1	1	0.983146	0.99635	0.475862	1	235	210	178	274	145	317	0.333333	0.482759	0.994475	0	0.594595	0	1	0	0	0	0	0.466667
118025084	T	G	G	G	G	G	G	0.666667	1	1	0.916667	1	1	12	6	3	12	4	7	1	0	0	0	0	0	1	1	0	0	1	0
18990984	T	C	C	C	C	C	C	1	1	1	1	1	0.583333	7	7	5	19	5	12	0	0	1	1	0	1	0	0	0	0	0	1
86185438	T	C	C	C	C	C	C,A	1	0.5	1	1	0.75	1	4	4	2	4	4	3	0	0	0	1	1	0	0	0.666667	0	1	0	0
69414765	A	G	G	G	G	G	G	1	1	0.75	1	1	1	2	8	4	2	4	6	0	0	0.666667	0.333333	0	0	1	0.666667	0.5	1	0	0
27600996	A	G	G	G	G	G	G	1	1	1	1	1	1	3	8	13	19	4	2	0	0	0	0.75	0	0	1	0	0	0.666667	1	1
10142885	G	A	A	A	A	A	A	1	0.992353	0.991361	1	1	0.613592	1173	1177	463	941	479	515	0.960784	1	0.493243	0	0.47541	0.588785	0	0	0	0.495787	0	0
86713316	C	G	G	G	G	G	G	0.605364	1	1	0.995475	0.522556	0.589905	522	339	180	442	266	317	0.875	0	0.510695	0	0	0	0	0.43254	0.441441	0.549419	0.320988	0
84974355	C	T	T	T	T	T	T	1	1	1	1	1	1	5	7	6	10	7	9	0	0.5	0.8	0.368421	0.8	0.6	0	0.166667	1	0.181818	0	0
544079	T	C	C	C	C	C	C	0.181818	1	0.666667	1	0.4	1	11	3	3	8	5	3	0	0	0	0	0	1	0	1	0	0	0	0.666667
82050693	A	C	C	C	C	C	C	0.45098	0.34507	0.356322	0.551724	0.40625	0.357143	102	142	87	58	32	28	0.266055	0	0	0	0.294118	0.328947	0	0	0	0	0	0
6637393	G	A	A	A	A	A	A	0.642857	0.25	1	0.538462	0.4	0.466667	14	8	7	13	10	15	0	0	0.533333	0.6	0	0	0	0.588235	0	0	0	0
83472494	A	C	C	C	C	C	C	0.923077	1	0.75	1	1	0.857143	13	5	4	15	4	7	0	1	1	0.555556	0	0.5	0	0	0	0.5	0	0.4
23442552	T	C	C	C	C	C,A	C	0.791667	1	0.923077	0.733333	1	1	24	16	13	15	7	2	1	0	0	0	0	0	0	0	0	1	1	0.875
6087425	G	A	A	A,T	A	A	A	1	1	1	1	1	1	8	4	11	24	8	26	0	0	0	0	1	0	0	1	0	1	0.428571	1
22260974	C	T	T	T	T	T	T	1	1	1	1	1	1	2	2	2	2	4	4	0	0	0	0	1	0	1	1	0	0.428571	0	1
33123380	T	A	A	A	A	A	A	0.571429	1	1	0.5	1	1	7	7	3	8	15	23	0	0	0.333333	0	0.666667	1	0	0	0.5	1	0	0
4716573	T	C	C	C	C	C	C	1	0.714286	1	1	1	1	9	14	23	22	8	13	1	0	0	0.727273	0.416667	1	0	0	0	1	0	0
1067830	G	A	A	A	A	A	A	1	0.277778	0.857143	1	0.384615	0.166667	23	18	7	16	13	12	0.666667	1	0	0	0	0	0	0.45	0	0	0	0
49907729	T	C	C	C	C	C	C	0.5	0.615385	0.8	0.666667	0.5	0.583333	12	13	5	3	14	12	0	0	0	0.666667	0	0	0.375	0.25	0	0.333333	0.16	0.3125
63638042	A	G	G	G	G	G	G	0.815789	0.823529	0.833333	0.868852	0.666667	0.733333	76	51	24	61	9	90	0.769231	1	0.904762	0	0	0.5	0	0	0	0	0	0
33172752	C	G	G	G	G	G	G	1	1	0.8	0.666667	1	1	2	9	5	6	3	2	0	0.4	0	0	0	1	0	1	0	0.5	1	0
2939795	C	A	A	A	A	A	A	1	1	1	0.5	0.6	1	5	2	2	8	10	4	0	0	0	0	1	1	0	0.285714	0	1	0	0.25
32186453	C	G	G	G	G	G	G	0.642857	0.419355	0.387097	0.326733	0.230769	1	56	31	62	101	26	91	0	0	0.352941	0.625	0	0	0	0	0	0	0.466667	0
6042688	T	C	C	C	C	C	C	1	1	1	1	1	1	8	13	12	30	15	68	0	1	0.6	0.444444	0.666667	1	0	0.727273	0	0	0	0
86713181	T	G	G	G	G	G	G	0.512563	1	0.978261	1	0.465686	0.502793	398	231	138	230	204	179	1	0	0.410714	0	0	0	0	0.458128	0.237624	0.446602	0.344828	0
4823103	G	T	T	T	T	T	T	0.512195	0.75	0.4	0.625	1	1	41	28	20	24	9	18	0	0	0	0	0.588235	0.666667	0	1	0	0	0.473684	0
6801826	T	G	G	G	G	G	G	1	0.25	1	1	0.714286	0.436364	8	12	10	44	14	55	0	0	0	0.542857	0	0	0	0	0.652174	0.166667	1	0.480769
32185313	T	C	C	C	C	C	C	0.625	0.4	0.52381	0.444444	0.142857	1	40	15	21	36	28	61	0.555556	0	0.3125	0.222222	0	0	0	0	0	0	0.488372	0
140188793	C	A	A	A	A	A	A	0.458042	0.988372	1	1	0.426829	0.707692	286	172	75	109	82	65	0.288288	1	0.295918	0.439394	0	1	0	0	0	0	0	0
68468847	G	A	A	A	A	A	A	0.45	1	1	1	1	0.642857	20	17	7	14	4	14	0	0.5	0.578947	0	0	0	0.818182	0.75	0.888889	0	0	0
97303275	A	G	G	G	G	G	G	0.714286	0.727273	1	1	1	1	14	11	4	7	3	2	0	1	0.6	1	0	0.285714	0	1	0	0	0	0
26628030	T	C	C	C	C	C	C	1	1	1	1	0.666667	0.538462	3	2	4	8	3	13	0	0	1	0.272727	0.235294	1	0	0.75	0	0	0	0.391304
25427756	T	C	C	C	C	C	C	0.818777	1	0.303571	0.394265	0.508982	1	458	170	112	279	167	34	0	0.195402	0	0	0.727273	0	0.111111	0.191489	0	0.24812	1	0
42577813	G	A	A	A	A	A	A	1	0.833333	1	1	0.818182	1	19	6	4	10	11	6	0	1	0	0	0.666667	0.5	0	1	0	0.6	0.333333	0
89836847	C	T	T	T	T	T	T	0.475728	0.494565	0.99759	0.996032	1	0.36087	1030	368	415	504	451	460	0	0.459259	0.453564	0	1	0.450262	0	0.410345	0	0	0	0
71318798	T	C	C	C	C	C	C	1	1	1	1	0.636364	1	14	4	5	9	11	4	1	0.8	0.571429	1	0	0	0	0	0	0.714286	0	0
75680810	C	G	G	G	G	G	G	1	1	1	1	1	1	14	9	5	14	5	17	0	1	0.4	0.478261	0.428571	0	0	0	0.285714	0.571429	1	0.285714
6132469	G	T	T	T	T	T	T	0.9	1	0.987879	0.990654	0.970149	1	70	81	165	214	67	149	0	1	0	0	0	0	0	0.981651	0	0.786667	0.711864	0.821429
6038436	T	C	C	C	C	C	C	0.371626	0.999688	0.97812	0.995567	0.999272	0.996606	6372	3205	2468	5414	2749	3536	0	0.963746	0	0.233151	0	0	0	0.993782	0	0.992796	0.309389	0.301531
26326645	C	T	T	T	T	T	T	0.545455	1	1	1	1	1	11	2	10	10	3	6	1	0	0	1	0	0	0	0	1	1	0	0
69832423	A	G	G	G	G	G	G	0.355932	0.518182	0.680851	0.688525	1	0.55102	118	110	47	61	67	98	0.588235	0	0.39604	0	0.655738	0.609375	0	0	0	0	0	0
47353027	A	G	G	G	G	G	G	0.553073	0.42	0.578431	0.485577	0.628571	1	179	200	102	208	175	209	1	0.488889	0	0	0.632353	0	0	0	0	0	0	0
54202343	C	T	T	T	T	T	T	1	0.55	1	1	1	0.217391	25	20	20	30	12	23	0	0	0	0.6	0	0	0.875	0	1	0	0.75	0
65039373	C	A	A	A	A	A	A	0.570175	1	0.672727	0.526316	0.53125	1	114	59	55	57	32	25	0.615385	0	0.461538	0.552083	0.638554	0.490909	0	0	0	0	0	0
6128663	T	C	C	C	C	C	C	1	1	0.789474	1	1	1	20	20	19	24	11	15	0	1	0	0	0	0	0	1	0	1	0.25	1
8576879	T	A	A	A	A	A	A	0.62963	0.5	0.933333	1	1	1	27	4	15	14	9	2	0	0	0	1	1	0.666667	0	0	0.857143	0	0	0
6040122	A	T	T	T	T	T	T	0.333333	0.55	0.4	0.2	0.30303	0.285714	30	20	20	70	33	56	0	0.333333	0	0	0.2	0	0	0	0	0	0	0
26099633	C	A	A	A	A	A	A	1	1	0.6	1	0.9375	1	13	6	5	7	16	11	0	0	1	0	0	0	1	0	0	0	1	1
67903759	A	G	G	G	G	G	G	1	1	1	1	1	0.377551	5	9	12	14	7	98	0	1	0	0	1	0.571429	0.428571	0	0	0.470588	0	0.373134
67799022	A	G	G	G	G	G	G	1	1	1	1	1	1	3	10	4	7	16	2	0	0	0.8	1	0	0	0	0	0	1	0.666667	1
89325022	A	G	G	G	G	G	G	1	1	1	1	1	0.647059	22	7	9	13	7	17	0	0.4	1	1	0	1	0	0.714286	0	0	0	0
35875052	G	A	A	A	A	A	A	0.54386	0.462121	0.984127	1	1	0.511628	228	132	63	184	211	43	0	0.541935	0.460123	0.416667	0.466667	0	0.484615	0.59901	0	0	0	0
98852122	A	G	G	G	G	G	G	0.6	1	1	1	1	0.571429	5	2	6	27	6	21	0	0	0	0.6	0	0.36	0.409091	1	1	0	0.272727	0
23273520	G	A	A	A	A	A	A	1	0.415584	0.470769	0.441478	0.458333	0.530452	376	231	325	487	288	509	0	0	0	0.446328	0.981481	0	0	0	0	0	0.359223	0
89131171	A	G	G	G	G	G	G	0.666667	0.833333	1	0.857143	0.631579	1	36	12	2	7	19	10	0	0	0.625	0.571429	1	0.333333	0.6	0.333333	0	0	0	0
19383527	G	A	A	A,C,T	A	A	A	1	0.413793	1	1	1	1	12	29	13	53	15	5	0.888889	1	1	0	0	1	0	0	0	0	0	0
45143210	T	G	G	G	G	G	G	0.467391	0.5	0.68	0.595506	1	1	92	68	25	89	35	75	0	0	0.388889	0.509091	0	0.615385	0.552632	0.653846	0	0	0	0
77432194	A	C	C	C	C	C	C	0.611111	1	0.6	0.692308	1	1	18	17	5	26	6	5	0.916667	0	0	1	0.714286	0	0	0	0	0	0.75	0
147591122	G	T	T	T	T	T	T	0.4	0.26087	0.444444	0.5	0.581395	0.377778	25	23	27	48	43	45	0	0	0	0.190476	0	0	0	0.344828	0	0	0.285714	0.222222
6115879	A	T	T	T	T	T	T	0.571429	1	0.714286	0.916667	0.8	0.767442	7	4	7	36	15	43	0	1	1	0	0.75	0.5	0	0	0	0	0	0
48187724	T	C	C	C	C	C	C	0.377358	1	0.516129	0.363636	1	1	53	29	31	22	32	33	0	0	0	1	0	0	0	0.73913	0	0	1	0
6041469	G	T	T	T	T	T	T	0.75	1	1	1	1	1	12	15	21	51	30	127	0	1	0.692308	0.266667	0.416667	1	0	0.857143	0	0	0	0
14905166	A	C	C	C	C	C	C	0.5	0.166667	0.6	0.75	1	1	12	18	5	8	5	14	0	0	0	0	0	0	0	1	0	0.5	1	0
56910411	T	C	C	C	C	C	C	1	1	0.571429	0.444444	1	1	8	3	7	9	5	2	0	1	1	0.5	0	1	0	0	0	0	0	0
73656063	T	G	G	G	G	G	G	0.846154	0.5	1	1	1	1	13	8	2	15	2	2	0	0	0	0	0	0	0	1	1	0.833333	0	1
40186298	A	G	G	G	G	G	G	0.53461	0.993141	1	0.994286	0.441397	0.565693	679	729	289	700	401	274	0.532951	0	0.564238	0	0.469388	0.411429	0	0.583004	0	0	0	0.455357
36985669	G	T	T	T	T	T	T	1	0.428571	0.473684	0.775	1	0.4375	97	35	19	40	56	48	0	0.692308	0.529412	0.166667	0.571429	0.642857	0	0	0	0	0	0
4225454	T	G	G	G	G	G	G	0.192308	1	0.956522	1	0.615385	1	26	24	46	42	26	9	0	0	0.96	0.52381	1	0	0	0.769231	0	0	0	0
6132514	G	T	T	T	T	T	T	0.86747	1	1	0.991632	0.969697	1	83	89	147	239	66	167	0	1	0	0	0	0	0	0.97561	0	0.7	0.8125	0.831461
43947667	T	C	C	C	C	C	C	0.363636	0.346154	0.205128	0.471698	0.516129	0.492063	44	52	39	53	31	63	0	0	0	0.453333	0.432432	0	0	0	0	0	0	0
63669967	T	C	C	C	C	C	C	1	0.454545	1	1	1	0.972973	3	11	4	10	3	37	0	0	1	0.919355	0	0	1	0	0	1	0	0
6096391	A	G	G	G	G	G	G	0.614286	0.569444	0.425287	0.659574	0.666667	0.906542	70	72	87	376	96	107	0	0.85	0	0	0	0	0	0.666667	0	0	0	0.818182
59438667	G	A	A	A	A	A	A	0.479452	0.969697	0.676471	0.470588	0.366667	0.475	73	66	34	51	30	40	0	0.481481	0	0	0	0	0	0	0	0.454545	0	1
24329166	G	C	C	C	C	C	C	1	0.982759	1	1	1	0.455357	129	116	107	134	61	112	0.629213	0.510204	0.409091	1	0	0.492754	0.431373	0	0	0	0	0.464286
56342011	A	G	G	G	G	G	G	1	1	1	1	1	1	14	2	9	2	4	2	0	0	1	1	0	1	0	1	0	0.5	0	0
43625780	G	T	T	T	T	T	T	1	1	0.75	1	1	1	6	4	4	2	2	2	1	0	0	1	1	0	1	0	0	0	0.25	0
100287537	T	C	C	C	C	C	C	1	0.5	1	1	1	1	7	6	10	11	8	3	1	0	1	0	1	0	0	0	1	0	0	0
49905059	C	T	T	T	T,A	T	T	1	0.5	1	1	1	1	8	4	3	3	3	1	0	1	1	0	0	1	0	0	0	1	0	0
9481759	T	C	C	C	C	C	C	1	1	1	1	1	0.5	8	3	5	5	4	4	1	1	0	0	0	0	0.666667	0.333333	0	1	0	0
20091617	C	T	T	T	T	T	T	1	0.5	1	1	1	1	4	4	5	7	1	2	1	0	0	0	0	1	0	1	1	0	0	0
22260939	G	A	A	A	A	A	A	1	1	1	1	1	1	2	2	2	2	4	4	0	0	0	1	1	0	1	0	0	0.5	0	1
8956172	G	A	A	A	A	A	A	1	0.5	1	1	1	1	10	6	10	16	2	4	1	0	0	0	0	1	1	0	0	0	0	1
57102213	G	A	A	A	A	A	A	1	1	1	1	1	1	19	11	10	13	15	3	0	0	0.5	0	0	1	1	1	0	0	1	0
67798211	T	C	C	C	C	C	C	1	1	1	1	1	1	7	3	6	13	4	9	0	0	0.5	1	0	0	1	0	0	1	0	1
69414733	A	G	G	G	G	G	G	1	1	0.8	1	1	1	3	6	5	2	5	4	0	0	0.7	0.6	0	0	1	1	0	1	0	0
48191635	A	G	G	G	G	G	G	0.547619	1	0.5	0.452381	1	1	42	19	10	42	29	28	0	0	0	1	0	0	0	1	0	0	1	0
6130229	C	T	G	T	T	T	T	1	1	1	1	1	1	8	2	6	9	4	31	0	1	0	0	0	0	0	0.5	0	1	1	1
48869935	A	G	G	G	G,T	G	G	1	1	1	1	1	1	12	4	10	19	13	25	1	1	0	0.5	1	1	0	0	0	0	0	0
26920601	A	C	C	C	C	C	C	0.571429	1	1	1	1	1	14	12	5	13	7	5	0	0	0	0	0	0	1	0.571429	0	0.75	1	0.75
79803815	T	C	C	C,A	C	C	C	1	1	1	0.6	1	0.4	7	7	10	10	7	5	0	0	0	0	0	0	0	1	0.5	0	1	1
99869920	C	G	G	G	G	G	G	0.6	0.375	0.916667	0.705882	0.806452	1	20	40	12	17	31	40	0	0.956522	0	1	0.615385	0	0	0	0	0.333333	0	0
25939265	A	G	G	G	G	G	G	1	1	0.375	0.576923	1	0.5	66	48	8	26	15	14	0	0.533333	0.512821	0	1	0.608696	0	0.3	0	0	0	0
40028832	C	T	T	T	T	T	T	0.630769	0.5625	0.666667	0.526316	0.571429	0.391304	65	16	12	38	14	23	0	0.5	0	0.545455	0.307692	0.5	0	0	0	0	0	0
44721619	G	C	C	C	C	C	C	0.410714	0.447368	1	1	1	0.5	56	38	11	35	45	12	0.571429	0.642857	0	0.333333	0	0.625	0	0.689655	0	0	0	0
71417769	T	A	A	A	A	A	A	0.37037	1	0.977778	1	1	0.564103	27	41	45	68	32	39	0	0.578947	0.5	0	0.823529	0	0.681818	0	0	0	0	0.833333
25388284	A	G	G	G	G	G	G	1	0.464286	0.75	0.777778	1	1	13	28	4	9	5	24	0	0.5	1	1	0	1	0	0	0	0	0	0
111327662	C	T	T	T	T	T	T	1	1	1	1	1	0.491228	9	2	6	5	5	57	1	0	1	1	0	0	1	0	0	0	0	0
101373102	C	G	G	G	G	G	G	0.6	1	1	1	1	0.333333	35	2	4	16	16	6	0	0.444444	1	1	1	0	0	0	0	0	0	0
89324999	G	C	C	C	C,A	C	C	1	1	1	1	1	0.588235	25	6	6	7	8	17	0	0.5	1	1	0	1	0	0.6	0	0	0	0
86999838	C	T	T	T	T	T	T	1	0.142857	0.681818	0.527778	0.314286	0.392857	26	28	22	36	35	28	0	0	0	0	1	0	0	0	0	0	0	0.571429
40186100	G	C	C	C	C	C	C	0.504188	0.995349	0.994737	0.998505	0.461905	0.429952	597	645	380	669	420	414	0.489292	0	0.528226	0	0.417778	0.467128	0	0.505415	0	0	0	0.489559
81097151	G	A	A	A	A	A	A	0.485207	1	1	1	0.503185	0.993789	338	130	89	242	157	161	0.52381	1	0	0	0	0.488889	0	0	0	0.536313	0.527132	0.41989
15469342	C	T	T	T	T	T	T	1	1	0.461538	0.76	1	0.481481	36	41	65	50	9	27	0	1	0	0	0.5	0	0.529412	0	0	0.461538	0	0.727273
75680825	C	A	A	A	A	A	A	1	1	1	1	1	1	10	15	2	11	5	15	0	1	0.5	0.421053	0.375	0	0	0	0.333333	0.571429	1	0.315789
89832236	C	T	T	T	T	T	T	1	1	1	1	1	1	2	4	2	3	2	3	0	1	0	0.6	0	1	0	0.5	0	0.75	0	0.666667
76777732	G	A	A	A	A	A	A	0.333333	1	0.571429	0.769231	1	1	15	22	7	13	10	11	0	0	0.444444	0	0.285714	1	1	0	0	0	0	0.461538
21711065	T	C	C	C	C	C	C	0.5	1	1	0.714286	1	1	4	3	3	7	2	10	0.666667	1	0	1	0	0	0	0.4	0	0.666667	0	0
846626	C	A	A	A	A	A	A	0.992	0.984127	1	1	0.990099	0.974684	125	126	48	65	101	79	0.544118	0.545455	0	0.376623	1	1	0.569767	0	0	0	0	0.424242
6119077	G	A	A	A	A	A	A	0.777778	0.375	0.4	0.513514	0.818182	0.592105	18	8	20	37	22	76	0	0	0	1	0	1	0	0	0	0	0	0
60612973	C	T	T	T	T	T	T	1	1	1	1	1	1	101	71	41	53	44	52	0.488372	0.222222	1	0.9	0.916667	0	0	0	0	0	0	1
22391171	G	C	C	C	C	C	C	1	1	1	1	1	1	126	84	62	79	37	97	0.457627	0.45283	1	0.622642	1	1	0	0	0	0	0	0
38359257	T	C	C	C	C	C	C	1	1	0.571429	0.666667	0.666667	1	8	6	7	6	3	2	0	0	0.666667	0	0	0	0.8	0	1	0.571429	0	0.4
67739496	C	A	A	A	A	A	A	1	1	1	1	1	0.466667	4	10	2	8	15	15	0	1	1	1	0	1	0	0	0	0	0	0
27471810	A	C	C	C	C	C	C	1	1	0.666667	0.8	1	1	15	4	3	10	2	4	0	0	1	1	0	0	1	1	0	0	0	0
86713373	G	C	C	C	C	C	C	0.593679	1	1	0.997283	0.506726	0.530534	443	344	192	368	223	262	0.923077	0	0.49	0	0	0	0	0.440191	0.390805	0.526104	0.392593	0
6099437	A	C	C	C	C	C	C	0.512195	0.734375	0.62963	0.590078	0.666667	0.796407	123	64	189	383	48	334	0	0.46875	0	0	0	0	0	0.608	0	0.489583	0.42623	0.475
13424838	G	A	A	A	A	A	A	0.333333	0.75	1	1	1	0.555556	12	8	12	15	6	18	0.615385	0.625	0	0.5625	0	0.375	0.5	0	0	0	0.5	0
78877638	T	C	C	G	C	C	C	0.636364	0.875	0.5	0.857143	0.444444	0.642857	11	8	4	14	9	14	0	0	1	0	0	1	0	0	0	0	0	0.5
70972263	A	G	G	G	G	G	G	1	1	1	1	0.454545	1	2	6	12	12	11	3	1	0	0	0	1	0	0	0	0	1	1	0
22124972	G	A	A	A	A	A	A	1	0.5	1	0.8	1	0.5	5	10	5	10	2	4	0	0	0	0	1	0.8	0.545455	0	0	1	0	0
63235083	A	G	G	G	G	G	G	0.999193	0.998571	0.994172	0.999192	0.453728	0.446019	6192	6997	6005	4948	4117	6984	0.474254	0.496137	0.504925	0.480655	0	0.527455	0.473845	0	0.480069	0	0	0
99894760	A	G	G	G	G,T	G	G	1	1	1	1	1	1	42	26	10	28	18	18	0	0	1	0	1	1	0	0.714286	0	0	0.833333	0
62329550	A	T	T	T	T	T	T	1	0.5	1	1	0.75	1	16	8	12	18	8	3	0	0	0	0.2	0.6	1	0	0.5	1	0	0.5	0
5860760	T	C	C	C	C	C	C	0.5	0.862069	1	1	0.707317	0.592437	44	29	162	314	41	238	0	0.944444	0.466667	0.368	0.457014	0.458015	0	0.520661	0	0	0	0
829060	A	G	G	G,T	G	G	G	1	1	1	1	1	1	16	24	12	10	11	22	0	0.37037	0	0.222222	1	1	0.434783	0	1	0	0	0.526316
89047374	A	G	G	G	G	G	G	0.75	0.333333	0.6	0.666667	0.875	0.571429	16	9	5	12	8	21	0	0	0	0	0.666667	0	0	0.5	0.222222	0.428571	0.233333	0.3
79802558	T	G	G	G	G	G	G	1	1	0.888889	1	1	0.785714	5	3	9	9	16	14	0	0	0	0	0	0.75	1	1	0	0.333333	0.5	0.647059
61272802	T	C	C	C	C	C	C	0.351351	0.411765	0.6	0.424242	0.3	0.4	37	17	10	33	20	10	0	0	0	0	0.333333	0	0.214286	0	0.5	0	0	0
85223890	G	A	A	A	A	A	A	1	1	0.594118	0.453608	0.610619	0.535565	245	159	170	291	113	239	0.935484	1	0.5	0	0	0.318841	0	0	0	0	0	0
35843950	T	C	C	C	C	C	C	0.666667	0.888889	0.833333	0.944444	1	1	15	18	12	36	11	71	0	0	0.75	1	1	0	0.444444	0.3	0	0	0	0.4
22811697	A	G	G	G	G	G	G	0.557823	1	0.943396	0.984615	1	1	147	85	106	130	55	69	0	0.517241	0	0	0	0.510417	0.487705	0.532338	1	0	0	1
42315974	G	A	A	A	A	A	A	0.305556	0.451613	1	1	0.210526	0.490196	36	31	19	27	19	51	0	1	0	0.46875	0.555556	0	0	0	0	0	0	0
79803812	C	T	T	T	T	T	T	1	0.833333	0.4	0.4	1	0.4	7	6	10	10	7	5	0	0	0	0	0	0	0	1	0.6	0	0	1
17726045	T	A	A	A	A	A	A	0.6	0.263158	1	1	0.510204	1	70	19	11	39	49	16	0	0	0	0	0	0.446809	0	0	1	0.557692	0.9375	0
6133433	G	A	A	A	A	A	A	0.979167	1	0.986486	0.97541	0.947368	1	48	34	74	122	38	78	0	1	0	0	0	0	0	0.958333	0	0.903226	0.75	0.846154
19162968	A	G	G	G	G	G	G	1	0.285714	0.736842	1	1	1	52	21	19	8	8	29	0	0	0.333333	0.444444	0.375	0	0	0.538462	0.625	0.333333	0.526316	0.416667
93623194	C	T	T	T	T	T	T	0.583333	1	1	1	0.272727	1	12	9	15	13	11	16	0	0	0.6	0.285714	0	0.625	0.25	0.666667	1	0	0	0
67808046	C	T	T	T	T	T	T	0.428571	1	1	1	1	1	7	4	7	4	2	5	0	1	1	0	0	0	0	1	1	0	0	0
35721390	A	C	C	C	C	C	C	0.842105	1	1	1	1	1	19	2	5	16	5	21	1	0.8	0	0.571429	0	0	0	0	0.7	0.6	0.575758	0.166667
6168808	T	C	C	C	C	C	C	1	1	1	1	1	1	7	13	7	5	5	27	0	0	0	0	0	1	1	0	0	1	0.578947	1
107929185	C	T	T	T	T	T	T	0.566038	0.425926	1	1	0.820513	0.214286	106	54	16	58	39	28	0	0.565217	0	0	0.789474	0	0	0.619048	0	0	0	0.634146
22804295	A	G	G	G	G	G	G	0.210526	1	1	1	1	1	19	23	8	28	15	42	0	0.666667	0	0	0	0.625	1	0.5	1	0	0	0
45482721	G	C	C	C	C	C	C	1	1	0.9	0.916667	0.692308	1	25	3	10	12	13	16	0	0.8	0.625	0.666667	0	0	1	0	0	0	1	0
37993743	C	G	G	G	G	G	G	0.6625	0.813953	0.757576	0.833333	0.321429	0.779661	80	43	33	78	56	59	0	0.363636	0.835616	0	0.333333	0	0.842105	0	0	0	0	0.377049
104021911	A	G	G	G	G	G	G	0.75	1	0.666667	1	1	1	4	4	6	2	3	6	0	1	1	1	0	1	0	0	0	0	0	0
103688867	C	T	T,A	T	T	T	T,A	1	1	0.611111	0.411765	0.592593	1	6	11	18	51	27	11	0	0	1	1	1	0	0.2	0	0	0	0	0
82344206	C	A	A	A	A	A	A	1	0.608696	0.642857	0.275862	1	1	35	23	14	29	12	20	0	0	0	0.533333	1	0	0.461538	0	0.388889	0.3	0	0.428571
37993762	G	A	A	A	A	A	A	0.659574	0.8	0.8125	0.8	0.23913	0.871795	47	30	16	40	46	39	0	0.322581	0.847826	0	0.392157	0	0.825	0	0	0	0	0.380952
26664002	C	T	T	T	T	T	T	0.727273	0.904762	1	1	1	0.882353	11	21	3	18	4	17	0	1	0	0	0	0	0.5	1	0	1	0.6	0
6093199	C	T	T	T	T	T	T	0.621118	0.571429	0.691406	0.684615	0.58209	0.393701	161	84	256	520	201	254	0	0.679144	0.6	0.364238	0	0	0	0.489933	0	0	0	0
6132527	A	G	G	G	G	G	G	0.83871	1	1	0.992481	0.970149	1	93	107	158	266	67	177	0	1	0	0	0	0	0	0.978261	0	0.754386	0.810345	0.849057
55835144	G	C	C	C	C	C	C	1	0.9	0.714286	0.222222	0.5	0.761905	3	10	7	9	24	21	0	1	0	0.5	0	0	0	0	0.5	0	0.277778	0.413793
33930702	G	T	T	T	T	T	T	0.681818	0.9	0.25	0.846154	0.3	0.454545	22	10	8	13	10	66	0	0	0.444444	1	0.25	0.333333	0	0	0	0	0	0
21028523	T	C	C	C	C	C	C	0.588235	0.6	1	1	1	1	17	10	5	5	8	6	0	0.357143	1	1	1	0	0	0.428571	0	0	0	0
147422431	T	C	C	C	C	C	C	1	0.548387	1	1	0.477876	0.376812	92	31	32	99	113	69	0.416667	0	0.431818	0	0	0.269231	0	0.588235	0	0.296296	1	0
89329285	T	C	C	C	C	C	C	1	1	1	1	1	0.4	6	2	4	9	5	5	0	0	1	1	0	1	0	0	1	0	0	0
77585344	A	G	G	G	G	G	G	1	0.4	1	1	1	1	11	5	3	3	7	7	0	1	1	1	0	0	0	0	0	1	0	0
77502600	T	C	C	C	C	C	C	1	0.4	1	1	1	1	8	15	5	2	5	2	1	0	0	1	0	1	0	0	0	1	0	0
106670045	T	C	C	C	C	C	C	1	1	1	1	1	1	4	3	3	3	3	2	0	0	0	0	0	0	0.6	1	0	1	1	1
40049666	T	C	C	C	C	C	C	1	1	1	1	1	1	12	2	2	7	2	8	0	1	0	1	0	1	0	0	0	0.5	0.5	0.6
49265663	G	A	A	A	A	A	A	1	1	1	1	1	1	8	13	12	31	15	5	1	0	0	0.6	1	0.5	0	0	1	0	0.5	0
25846978	T	G	G	G	G	G	G	0.8	1	1	1	0.6	1	5	18	3	23	5	19	1	1	1	0	0	0	0	0	0	0	0	1
28786953	G	C	C	C	C	C	C	1	1	1	1	1	1	19	25	11	17	5	11	0.454545	0	0	0.352941	0.916667	1	0.222222	0	0	0.6	0.555556	0.5
16135571	T	G	G	G	G	G	G	1	1	1	1	0.363636	1	15	7	3	2	11	2	1	0	0	0.4	0	1	0.4	0.5	0.666667	0	0	0
20854360	T	C	C	C	C	C	C	0.5	0.181818	0.666667	0.583333	0.266667	0.363636	4	11	6	12	15	11	0	0	0	0	0	0	0.5	0.666667	0	0	0	0
5874440	C	T	T	T	T	T	T	1	0.357143	0.192308	0.238095	0.26087	0.576923	4	14	26	21	23	52	0	0.545455	0.152174	0.235294	0	0	0	0.3	0	0	0	0
21192503	A	G	G	G	G	G	G	0.407407	1	1	1	0.6	1	27	11	4	4	15	2	0	0	0	0	0	0	1	0.888889	0	0.705882	0.857143	0.166667
36351360	C	T	T	T	T	T	T	0.44	1	1	1	0.333333	1	25	6	4	4	9	4	0	1	1	0	0	0.285714	0	0	0	0.5	0.6	0
18249606	G	A	A	A	A	A	A	0.583333	0.489362	1	1	1	1	24	47	18	42	36	59	0	0.428571	1	0.666667	0	0	0	0.526316	0.214286	0.363636	0.485714	0
6042990	C	T	T	T	T	T	T	0.875	1	1	1	1	1	8	6	17	27	8	55	0	1	0.75	0.5	0.571429	0.888889	0	0.777778	0	0	0	0
57989976	A	G	G	G	G	G	G	1	0.384615	1	1	1	1	12	26	8	35	8	17	0	0	1	1	0	0	0	0	0	0	1	1
42104538	A	G	G	G	G	G	G	0.9875	0.471698	1	1	1	1	80	53	35	49	32	15	0.546667	0.257143	0	0	0.983333	0.34	0.978947	0	0.477612	0	0.491525	0
67796682	G	A	A	A	A	A	A	1	1	1	1	0.8	1	8	5	28	22	10	11	0	0	0.75	0	0	0.666667	1	0	1	0	0	1
27931200	T	C	C	C	C	C	C	1	1	1	1	1	1	7	5	3	6	10	2	0	1	0.714286	0	0.666667	0	1	0	0	0.666667	0	0.571429
52274140	G	A	A	A	A	A	A	1	1	0.5	0.333333	1	0.545455	3	11	4	12	6	11	0.285714	0	0.4	0.2	0.561404	0	0	0.631579	0.47619	0	0	0.444444
19283819	C	T	T	T	T	T	T	1	0.727273	0.515152	0.5	1	1	15	11	33	22	9	16	0	0.310345	0.939394	0.75	0	0.428571	0	0.652174	0	0.285714	0	0
11327950	A	T	T	T	T	T	T	0.407407	1	0.9375	1	0.222222	1	54	19	16	33	27	89	0.416667	0.25	0.526316	0.636364	0	0.521739	0.428571	0	0	0	0	0.411765
8912128	C	T	T	T,G	T	T	T	1	1	1	1	0.375	1	4	6	5	5	8	4	0	1	0	1	0	0	1	0	0	1	0	0
119080151	C	A	A	A,T	A	A	A	1	1	1	1	1	1	16	7	4	12	2	3	1	0	0	0	0	0	1	0	0	1	0.625	1
40847856	G	T	T	T,A	T	T,A	T	1	1	1	1	1	1	4	7	13	21	10	3	0	0	0	1	0.75	0.5	0.375	1	0	0	0	1
7895208	G	A	A	A	A	A	A	1	1	1	1	1	1	24	13	24	21	11	16	1	1	0.3	0.461538	1	0.5	0	0	0	0.363636	0	0
40485191	A	G	G	G,T	G	G	G	1	0.5	1	1	1	1	32	14	12	21	7	15	0	0	0.5	0.608696	0	1	1	0.555556	0	0	0	0.461538
6132522	C	T	T	T	T	T	T	0.836735	1	1	0.992395	0.970588	1	98	104	158	263	68	178	0	1	0	0	0	0	0	0.977273	0	0.781818	0.818182	0.848485
89836904	G	C	C	C	C	C	C	0.495146	0.520325	1	0.996	1	0.291777	1133	369	579	500	487	377	0	0.477011	0.523569	0	1	0.409692	0	0.52	0	0	0	0
105358604	A	C	C	C	C	C	C	0.651316	0.696429	0.8	0.576471	0.621622	0.575758	152	56	10	85	74	66	0	0	0	0	0	0.637931	0.592	0	0	0.662252	0.656934	0
39171283	G	A	A	A	A	A	A	0.888889	1	1	1	0.458333	1	9	25	43	39	24	16	1	0.4	0.416667	0	0.416667	0.25	0.363636	0.736842	0	0.4	0	0
33582457	A	G	A	A	A	A	A	1	0.888889	0.25	0.166667	0.626866	0.428571	5	9	8	12	67	63	0	1	0	0	0	0	0	1	0	0	0	0
6643810	T	A	A	A	A	A	A	0.708333	1	1	1	1	0.931034	48	21	31	63	41	29	0	0.548387	0.470588	0.40625	0.407407	0.366667	0.565217	0.3	0.4	0.458333	0	0.355556
846528	A	C	C	C	C	C	C	1	1	1	1	1	1	103	110	35	59	79	45	0.52809	0.526316	0	0.424242	1	1	0.631579	0	0	0	0	0.528846
89836879	T	G	G	G	G	G	G	0.486512	0.532468	0.985689	1	1	0.356659	1075	385	559	529	493	443	0	0.523077	0.520833	0	0.993789	0.456853	0	0.506211	0	0	0	0
527544	C	T	T	T	T	T	T	0.761905	0.636364	0.411765	0.387755	1	1	21	11	17	49	8	29	0.5	0	0.6	0.363636	0.466667	0.909091	0	0	0	0	0	0
1814376	T	A	A	A	A	A	A	0.533333	1	0.5	1	1	0.444444	15	4	6	5	12	9	0	0.72	0	0.4	0	1	0	0	0	1	0	0
136174858	C	T	T	T	T	T	T	1	1	1	0.857143	0.5	1	12	5	2	7	4	3	0	0	1	1	0	0	1	0	0	0	1	0
60600321	G	A	A	A	A	A	A	1	1	1	1	1	1	90	22	12	9	38	23	0	0.142857	1	1	1	0.5	0	0	0	0	0	1
12522268	T	C	C	C	C	C	C	0.571429	1	0.5	0.909091	0.818182	0.6	7	13	10	11	11	5	0.714286	0	0	0.611111	0.545455	0	0	0	0.727273	0	0	0.444444
31794902	C	T	T	T	T	T	T	0.621622	0.614035	0.571429	0.565217	0.555556	0.25	74	57	42	69	45	24	0	0	0.619048	0	0	0.5	0.703704	0	0	0	0	0
527748	C	T	T	T	T	T	T	0.529412	0.8125	0.578947	0.5	1	1	17	32	19	20	15	50	0.571429	0	0.466667	0.567568	0.461538	1	0	0	0	0	0	0
36985384	G	T	T	T	T	T	T	1	0.814815	0.368421	0.375	1	0.64	131	27	38	40	102	50	0	0.777778	0.555556	0.114286	0.818182	0.578947	0	0	0	0	0	0
65332892	A	T	T	T	T	T	T	0.555556	0.666667	0.5	0.545455	1	0.8125	9	6	8	11	2	16	0	0.428571	1	0	0	0.4	0.4	0	0	0.5	0	0
32184502	G	C	C	C	C	C	C	0.642276	0.380952	0.480769	0.585034	0.619048	1	123	42	52	147	63	113	0.482759	0	0.711538	0.510204	0	0	0	0	0	0	0.654762	0
5874686	A	C	C	C	C	C	C	0.4	0.444444	0.416667	0.307692	0.675676	0.482051	5	9	36	78	37	195	0	0.615385	0.2	0	0	0.25	0	0.3125	0	0	0	0
4717437	C	A	A	A,T	A	A	A	1	0.727273	1	1	1	1	14	11	10	14	15	35	1	0	1	0.714286	0.5	0.833333	0	0	0	0.333333	0	0
6132420	A	C	C	C	C	C	C	0.925	1	0.958333	0.985075	0.957447	1	80	72	144	201	47	93	0	1	0	0	0	0	0	0.986667	0	0.863014	0.740741	0.89
113679789	A	G	G	G	G	G	G	0.727273	0.692308	1	0.8	0.625	1	11	13	4	5	8	4	0	1	0	0	0	0	1	1	0	0.5	0	0
49403979	C	T	T	T	T	T	T	0.875	1	1	1	0.315789	0.5	16	52	35	30	19	20	0	0	0	1	0	0.478261	0	0.888889	0	0	0.619048	0.363636
35870610	C	G	G	G	G	G	G	0.428571	0.385714	1	0.991837	1	0.569307	315	280	250	245	162	202	0.480826	0.419355	0.462733	0.330709	0.463158	0	0.472973	0.404891	0	0	0	0
40848076	G	T	T	T	T	T	T	1	1	1	1	1	0.705882	2	5	11	19	7	17	0	0	0	1	0.7	0	0	1	0.666667	0	0	1
6038939	A	C	C	C	C	C	C	0.615385	0.993289	0.763158	0.865385	0.983871	0.835749	13	149	76	104	62	207	0	0.8	0.538462	0.444444	0.666667	0.705882	0	0.5625	0	0	0	0
32185911	T	G	G	G	G	G	G	0.460317	0.441176	0.296296	0.509434	0.230769	1	63	34	54	53	13	94	0.75	0	0.392857	0.181818	0	0	0	0	0	0	0.276596	0
27091792	T	C	C	C	C	C	C	0.530488	0.608696	1	1	1	0.474576	164	115	49	115	71	59	0.568966	0.617647	0	0	0	0	0	0.513761	0.493333	0.576577	0.508065	0
76110638	C	T	T	T	T	T	T	1	0.611111	1	1	1	1	25	18	3	4	4	10	1	0.333333	0	0.333333	0	1	0.307692	0.666667	0	0.35	0	0.285714
33930553	T	A	A	A	A	A	A	1	0.285714	1	1	0.5	0.548387	7	21	8	23	12	31	0	0	0	1	0	1	0	1	0	0	0	0
6070552	C	T	T	T,A	T	T	T	1	1	1	1	1	1	4	3	4	10	4	38	1	0	0	0	0.333333	1	0.333333	1	0	0	0.333333	0.666667
72928959	G	A	A	A	A	A	A	1	1	1	1	1	1	15	27	23	39	15	8	0	1	1	0.666667	1	0	0	1	0	0	0	0
104307579	T	C	C	C	C	C	C	1	1	1	1	1	1	15	6	3	2	9	16	0	1	1	1	0	0.666667	0	0	0	0	0	1
113150290	A	G	G	G	G	G	G	1	1	1	1	1	1	11	13	2	3	2	6	1	1	0.666667	0	0	1	0	0	0	0	0	1
113765181	C	T	T	T	T	T	T	1	1	1	1	1	1	9	2	2	2	5	3	0	1	0	1	1	0	0	0	0	1	0.666667	0
113765182	A	C	C	C	C	C	C	1	1	1	1	1	1	9	2	2	2	5	3	0	1	0	1	1	0	0	0	0	1	0.666667	0
26673665	C	A	A	A	A	A	A	1	1	1	1	1	1	5	2	8	11	11	5	0	1	1	0	0	1	1	0.666667	0	0	0	0
29096578	C	A	A	A	A	A	A	1	1	0.833333	1	1	0.5	34	6	6	5	12	8	0	0	1	1	0	1	1	0	0	0	0	0
62340674	G	A	A	A	A	A	A	1	1	1	1	1	1	2	2	2	3	3	5	0	0	1	0	0	1	0	1	1	0	0.666667	0
22662054	T	A	A	A	A	A	A	1	1	1	1	1	1	12	7	6	3	8	5	0	0	1	0	0	0.666667	0	1	0	1	1	0
106152813	G	A	A	A	A	A	A	1	1	1	1	1	1	8	5	4	2	6	2	0	0.666667	0	0	1	0	0	1	0	1	1	0
37855761	C	G	G	G	G	G	G	1	1	1	1	1	1	4	2	5	8	2	15	0	0	1	0	0.666667	0	1	1	0	0	0	1
5271472	A	C	C	C	C	C	C	1	1	1	1	1	1	6	2	1	4	2	3	0	1	0.666667	0	0	0	1	1	0	0	0	1
99920513	A	G	G	G	G	G	G	1	1	1	1	1	1	4	2	4	14	2	27	0	1	0	0	1	1	0	0	1	0	0.666667	0
99920826	G	A	A	A	A	A	A	1	1	1	1	1	1	18	3	7	6	5	13	0	1	0	0	1	1	0	0.666667	0	0	1	0
102881147	A	T	T	AT	T	T	T	0.333333	0.421053	1	0.76	0.45	0.461538	24	19	1	25	20	13	0	0	0.333333	0.333333	0.266667	0	0	0	0.444444	0.5	0.217391	0
1881516	T	G	G	G	G	G	G	1	0.857143	1	1	1	0.4	11	14	4	9	4	5	0	0	1	1	0	0.571429	0	0.857143	0	0	0.5	0
27308338	T	C	C	C	C	C	C	0.230769	1	1	1	0.346154	0.631579	26	33	7	24	26	19	0	1	0.789474	0.384615	0.294118	0.411765	0	0	0	0	0	0
92297814	C	A	A	A	A	A	A	0.97561	1	1	1	0.923077	1	41	15	21	25	13	22	0	0	0	0	0	0	1	0	1	1	0.571429	1
6004436	G	A	A	A	A	A	A	1	1	1	1	1	0.988506	30	24	143	130	35	87	0	1	0	0	0	0	0	1	0	1	0.818182	0.843137
33930700	C	T	T	T	T	T	T	0.681818	0.9	0.25	0.833333	0.3	0.454545	22	10	8	12	10	66	0	0	0.444444	1	0.25	0.4	0	0	0	0	0	0
40847877	G	A	A	A	A	A	A	1	1	1	1	1	1	4	7	14	21	15	3	0	0	0	1	0.75	0.5	0.428571	1	0	0	0	1
6132510	C	T	T	T	T	T	T	0.876404	1	1	0.991701	0.984848	1	89	91	153	241	66	169	0	0.958333	0.166667	0	0	0	0	0.975904	0	0.754717	0.826923	0.849462
44055167	A	G	G	G,C	G	G	G	0.166667	1	1	0.777778	1	0.375	12	5	8	9	2	8	0	1	0	1	0	1	0	0	0	0	0	0
31738387	T	C	C	C	C	C	C	1	0.285714	0.166667	0.5	0.75	0.466667	11	14	12	14	8	15	0.428571	0	0	0	1	0	0	0	0	0	0.421053	0
40485171	A	G	G	G	G	G	G	1	0.363636	1	1	1	1	24	11	9	18	5	15	0	0	0.571429	0.631579	0	1	1	0.555556	0	0	0	0.285714
5874409	G	C	C	C	C	C	C	1	0.5	0.190476	0.294118	0.1875	0.507937	3	18	21	17	16	63	0	0.555556	0.162791	0	0.166667	0.142857	0	0.333333	0	0	0	0
24828453	A	T	T	T	T	T	T	0.583333	1	1	1	0.6	0.888889	24	19	13	26	10	9	0.894737	1	0	0	0.6	0	0.294118	0	0.5	0	0	0.466667
47181008	C	A	A	A	A	A	A	0.4	0.666667	0.75	1	1	1	5	15	4	19	3	8	1	0.5	0	0	0	0	0	0	0	1	0	1
4151213	T	C	C	C	C	C	C	0.433498	1	1	1	0.555556	1	203	126	24	76	81	27	0.520833	0	0.990991	0.526316	1	0	0	0.636364	0	0	0	0
5861812	C	A	A	A	A	A	A	0.55	0.714286	1	1	0.848485	0.561798	20	14	47	72	33	89	0	0.976744	0.416107	0.408451	0.514793	0.455882	0	0.588235	0	0	0	0
71372822	A	G	G	G	G	G	G	1	1	1	1	1	1	2	10	2	4	5	9	1	1	1	1	0	0.4	0	0	0	0.285714	0	0
59437371	G	C	C	C	C	C	C	0.344828	1	0.380952	0.592593	0.6	0.536	58	32	42	54	25	125	0	0.684211	0	0	0	0	0	0	0	0.456522	0	1
34537282	G	A	A	A	A	A	A	1	0.461538	0.666667	0.619048	0.5625	0.875	21	26	6	21	16	8	0	0	0	0.4	0	1	0.428571	0	0	0	0.4	0.642857
35870837	C	T	T	T	T	T	T	0.461328	0.42779	0.995671	0.988622	1	0.476395	1099	914	462	791	646	699	0.440367	0.389734	0.440554	0.413866	0.453069	0	0.490079	0.410432	0	0	0	0
5874684	C	A	A	A	A	A	A	0.4	0.444444	0.432432	0.3	0.675676	0.484694	5	9	37	80	37	196	0	0.615385	0.246154	0	0	0.230769	0	0.333333	0	0	0	0
25982573	A	G	G	G	G	G	G	0.4	0.444444	1	0.933333	1	0.533333	5	9	6	15	11	30	1	0	0	0	1	0	0	0	0	0	0	1
6800697	T	A	A	A,C	A	A	A	0.538462	0.3	1	1	1	0.425287	13	10	9	39	2	87	0	0.285714	0	0.444444	0	0	0	0	0.315789	0.375	1	0.532468
74873803	A	G	G	G	G	G	G	1	0.5	0.75	0.666667	1	0.4	8	4	8	3	5	15	0	0.4	0.666667	0.428571	0	0.4	0	0	0	0.777778	0.333333	0
63231707	C	G	G	G	G	G	G	1	0.875	1	1	0.35	0.403846	57	32	47	97	40	52	1	0	0.7	0.6	0	0.3	0.538462	0	0.181818	0	0	0
20977921	C	T	T	T	T	T	T,G	1	0.1875	1	1	1	1	129	64	46	79	71	18	0.397059	1	0	0	0.211111	0.223301	0	1	0.234783	0.202532	0.358333	0.251908
9661176	A	G	G	G	G	G	G	1	1	1	1	1	1	2	3	2	24	4	7	0	0	0.2	0.206897	1	0	0	0.285714	0	1	1	1
55639285	T	C	C	C	C	C	C	1	1	1	1	1	0.545455	12	11	5	18	5	11	0	0	0.583333	0.333333	1	1	0	0	0	0.75	0.571429	0
120076626	C	T	T	T	T	T	T	0.436782	1	0.288462	0.238095	0.47619	0.590909	87	44	52	63	42	44	0.444444	0	0	0	0	0	0	0	0.741935	0	0	0.537037
33608018	T	C	C	C	C	C	C	1	1	1	1	0.888889	0.571429	3	2	33	44	18	21	0.666667	0	0	0	0	0	0	0.888889	1	0.6	1	0
65502803	A	T	T	T	T	T	T	0.333333	1	1	1	1	0.4	15	2	6	2	3	5	0	1	0	0	1	0	0	0	0	0.428571	0	1
6003144	C	T	T	T	T	T	T	0.882353	1	1	1	1	1	17	15	34	43	15	33	0	1	0	0	0	0	0	1	0	0.8	1	0.777778
32185387	G	T	T	T	T	T	T	0.56	0.444444	0.5	0.275	0.266667	1	50	9	20	40	15	87	0.75	0	0.277778	0.214286	0	0	0	0	0	0	0.5	0
5904635	A	T	T	T	T	T	T	1	1	0.333333	0.736842	1	0.815789	3	2	9	19	7	38	0	1	0.5	0	0.833333	1	0.25	0	0	0	0	0
100531903	A	G	G	G	G,T	G	G	0.9	1	1	1	1	1	10	8	3	9	7	3	0	1	1	0.6	0	0	1	0	0	0	0	1
23931946	A	G	G	G	G	G	G	1	1	1	1	1	1	22	17	12	11	23	7	0	1	1	0.6	0.4	1	0	0	0.5	0	0.2	0
8784751	T	A	A	A	A	A	A	1	0.8	0.5	0.5	1	1	10	10	10	16	11	11	0	1	0	0	0	0	0	0.5	1	0	0	1
32184511	G	A	A	A	A	A	A	0.658333	0.394737	0.428571	0.527132	0.622951	1	120	38	49	129	61	108	0.466667	0	0.723404	0.489362	0	0	0	0	0	0	0.652778	0
21248538	T	A	A	A	A	A	A	1	1	1	1	0.857143	1	11	16	2	7	7	3	0	1	0	0	0	0	1	0.5	0	0.7	0.727273	0.631579
101182405	T	C	A	C	C	C	C	1	0.5	0.6	1	0.363636	1	2	4	5	3	11	4	0	0	0.5	0	0	0	1	0	1	0	0.666667	0
6102666	A	G	G	G	G	G	G	0.461538	0.56	0.827586	0.88	0.5	0.636364	26	25	29	75	4	121	0	0.714286	0	0	0	0	0	0.545455	0	0	0.666667	0.642857
24984039	A	G	G	G	G	G	G	0.636364	0.333333	0.333333	0.592593	1	1	11	9	6	27	18	11	0	0	0	0.6	0	0	1	1	0	0	0	0
19583578	T	C	C	C	C	C	C	0.25	0.4	0.4	0.6	0.5	0.266667	8	10	10	10	4	15	0	0	0	0.571429	0	0	0	0	0.285714	0	0	0.266667
3211643	A	G	G	G	G	G	G	1	0.625	0.5	0.857143	1	1	6	8	6	7	4	18	0	0	0	0.444444	0	0	0.5	1	0	0.4	0.8	0.545455
42316277	A	C	C	C	C	C	C	0.346154	0.35	1	1	0.4	0.363636	26	20	9	3	15	22	0	1	0	0.294118	0.875	0	0	0	0	0	0	0
10251191	T	G	G	G	G	G	G	1	1	1	0.954545	1	1	12	9	4	22	18	14	0	0	1	1	0	0	0	1	0	0	1	0.666667
67796657	A	T	T	T	T	T	T	1	1	0.969697	1	0.818182	1	9	11	33	31	11	15	0	0	0.75	0	0	0.75	1	0	1	0	0	1
313487	A	G	G	G	G	G	G	1	0.666667	1	1	1	0.529412	26	27	10	16	25	17	1	1	0	0.409091	1	0.5	0	0	0	0	0	0
72795532	G	A	A	A	A	A	A	1	1	1	1	1	1	6	6	4	7	2	4	0	0	0	0.714286	0	1	0	0	0	1	1	1
24965699	G	T,A	T	T	T	T	T	1	1	1	1	1	1	9	5	3	6	7	9	0	1	0	1	1	0	0	0	0	0	0.714286	1
83466018	A	G	G	G	G	G	G	1	1	1	1	1	1	24	14	15	39	6	8	0	0	0	1	0	0	0	0	1	1	1	0.714286
845738	G	A	A	A	A	A	A	1	1	1	1	1	1	98	36	19	33	53	56	0.842105	0.509091	0	0.566667	1	0.935484	0.487179	0	0	0	0	0.375
59802214	A	G	G	G	G	G	G	1	1	0.4	0.636364	0.8	0.714286	7	4	5	11	5	7	0	0	0	0	1	0.6	0	0	0	0	0.666667	1
73627112	T	C	C	C	C	C	C	0.333333	1	1	1	1	0.45	6	3	8	8	5	20	0	0.5	0	1	1	0	0	0	1	0	0	0
86713437	C	T	T	T	T	T	T	0.617391	1	1	1	0.522581	0.464912	345	292	200	302	155	228	1	0	0.452632	0	0	0	0	0.515789	0.38806	0.523077	0.443478	0
19026264	A	G	G	G	G	G	G	0.294118	0.25	0.333333	0.777778	0.5	0.411765	34	16	9	18	18	17	0	0.666667	0.619048	0	0	0	0	0	0	0	0	0
46691438	A	G	G	G	G	G	G	1	1	1	1	1	0.277778	2	5	7	13	5	18	0	1	1	1	0	0.5	0.5	0	0	0	0	0
41460491	G	A	A	A,T	A	A	A	0.941176	0.866667	0.794872	0.906667	0.714286	0.885714	17	15	39	75	28	35	0	0	1	0	1	1	0	0.833333	0	0	0	0
89838817	G	A	A	A	A	A	A	0.357143	0.333333	1	1	1	0.5	14	9	2	16	5	12	0	0	0.666667	0.75	1	0.5	0	0	0	0	0	0
16240594	C	A	A	A	A	A,T	A	0.870968	0.7	0.75	0.777778	1	0.8	31	10	8	9	24	15	0	1	0.875	1	0	0	0	0	0	0.75	0	0
67798522	G	A	A	A	A	A	A	1	1	1	1	1	1	10	4	7	19	4	8	0	0.6	0	1	0	0.555556	1	0	1	0.571429	0	0
2963005	A	T	T	T	T	T	T	0.5	0.8	1	0.888889	1	0.5	4	5	3	9	7	6	0	0	0.666667	0	0	1	0	0	0	0.75	1	0
6041419	T	C	C	C	C	C	C	0.571429	1	1	1	1	1	14	21	22	44	36	207	0	1	0.545455	0.4375	0.666667	0.727273	0	0.923077	0	0	0	0
931035	T	G	G	G	G	G	G	0.357143	0.769231	1	1	0.380952	0.6	28	26	12	21	21	15	0.589744	0	0.981818	0	0	0.857143	0.407407	0	0	0	0	0
33122678	T	C	C	C	C	C	C	0.485714	1	0.825	0.717391	1	1	35	21	40	46	11	28	0	0	0.681818	0	0.714286	0.8125	0	0	0.548387	1	0	0
35196507	G	A	A	A	A	A	A	0.402778	1	0.481481	0.418182	0.978723	0.41791	72	55	27	55	47	67	0	0	0	0.354839	0	0	0	0.527778	0.272727	0.190476	0.6	0.482759
21192495	T	C	C	C	C	C	C	0.423077	1	1	1	0.571429	1	26	10	4	4	14	2	0	0	0	0	0	0	1	0.888889	0	0.722222	0.9	0.214286
17031534	T	C	C	C	C	C	C	0.75	0.9	1	1	0.666667	0.285714	16	10	5	4	3	7	0	1	0.666667	0	0	1	0	0.666667	0	0	0	0
41167240	C	A	A	A	A	A	A	0.333333	0.222222	0.4	0.342857	0.3125	0.25	21	9	15	35	16	48	0	0	0	0	0	0	0.235294	0	0	0	0.357143	0
85223994	C	T	T	T	T	T	T	1	1	0.458599	0.460481	0.633929	0.634146	162	110	157	291	112	205	1	1	0.534091	0	0	0.384615	0	0	0	0	0	0
49396318	C	T	T	T	T	T	T	1	1	1	1	1	1	12	3	5	7	4	3	1	0	1	0	0	1	0	0.4	1	0.333333	0	0
6928910	T	C	C	C	C	C	C	1	0.5	1	0.8	1	1	2	8	12	15	7	13	0	0	0	0	0.666667	0	1	0	0.5	0.8	0.666667	0.4
35193913	G	A	A	A	A	A	A	0.727273	1	0.5	0.297872	1	0.625	33	43	18	47	19	16	0	0	0	0.552632	0	0	0	0.542857	0.458333	0.485714	0.444444	0.4
90748264	A	G	G	G	G	G	G	1	1	1	1	0.206897	0.496689	8	6	8	26	29	151	1	1	1	0	0	0.4375	0	0	0	0	0	0
140187487	G	A	A	A,C	A	C	A	1	1	1	1	0.385965	0.857143	49	35	6	24	57	14	0	1	0.34375	0.583333	1	0.75	0	0	0	0	0	0.3
15307282	C	A	A	A	A	A	A	0.608696	0.666667	0.956522	1	0.296296	0.307692	23	9	23	24	27	13	0	0.541667	0.5	0.2	0	0	0	1	0	0	0.333333	0
119929609	A	C	C	C	C	C	C	0.25	0.153846	0.230769	0.285714	0.222222	0.117647	12	13	26	42	9	51	0	0	0	0	0	0	0	0	0	0	0	0
10694037	C	G	G	G	G	G	G	0.5	1	0.714286	0.3	1	1	8	19	7	10	7	6	0	0	0	0	0	0.333333	0	0.777778	1	0.3125	0.833333	0
89840142	G	A	A	A	A	A	A	0.442149	0.524781	1	0.996885	1	0.380435	242	343	417	321	189	184	0	0.585455	0.505219	0	0.993056	0.516304	0	0.487085	0	0	0	0
6128357	T	C	C	C,A	C	C	C	1	1	1	1	1	1	4	10	14	17	5	16	0	1	0	0	0	0	0	1	0	1	0.888889	0.857143
6111067	A	G	G	G	G	G	G	0.666667	0.777778	0.3125	0.702703	0.666667	0.375	9	9	32	37	9	48	0	0	0	0.666667	0.7	0.5	0	0.380952	0	0	0	0
46972083	C	T	T	T	T	T	T	0.980769	0.5	0.377358	0.314286	1	0.96	52	66	53	35	50	25	0.485294	0	0	0	0.953125	0.959184	0	0	0	0	0	0.481481
42963062	G	A	A	A	A	A	A	1	1	1	1	1	0.482759	68	62	17	41	31	29	1	0	0.230769	1	0	0	1	0	0	0	0	1
53843645	G	T	T	T	T	T	T	1	0.988372	0.983051	1	0.6	1	171	86	118	183	120	105	0.984615	0.52809	0.427481	0.966102	1	0	0	0	0	0.413462	0	0
50310517	C	G	G	G	G	G	G	0.222222	0.321429	0.451613	0.588235	0.222222	0.444444	9	28	31	17	18	9	0	0	0.238095	0	0.428571	0	0.333333	0	0	0	0	0
62346808	A	T	T	T	T	T	T	1	1	1	1	1	1	8	4	7	7	4	5	0	0	1	0	1	0	0.25	1	1	0	0	0.5
103773453	G	A	A	A	A	A	A	1	1	1	1	1	1	3	18	4	23	3	19	0	0	0	1	0	0	0	0.75	0	1	1	1
5859011	T	C	C	C	C	C	C	0.285714	0.902439	0.97619	0.929412	0.75	0.575342	28	41	42	85	40	146	0	1	0.430108	0.316667	0.458763	0.377358	0	0.588235	0	0	0	0
62692582	T	C	C	C	C	C	C	0.41129	0.989637	1	0.989933	0.991228	0.983333	124	193	172	298	114	60	0.576923	0.441176	0	0.524272	0.469027	0	0	0	0.586667	0.52	1	0
43973532	C	T	T	T	T	T	T	0.692308	0.333333	0.235294	0.538462	0.235294	0.1875	13	30	17	13	17	16	0	0	0	0.636364	0.342857	0	0	0	0	0	0	0
59438924	T	C	C	C	C	C	C	0.369231	1	0.421053	0.326531	0.422222	0.285714	65	39	19	49	45	28	0	0.285714	0	0	0	0	0	0	0	0.296296	0	1
6039865	T	C	C	C	C	C	C	0.2	0.522727	0.714286	0.634146	0.627451	0.757962	35	44	84	123	51	157	0	0.181818	0.227273	0.441176	0.5	0.272727	0	0.590909	0	0	0	0
17031555	G	C	C	C	C	C	C	0.8125	0.777778	1	1	0.666667	0.285714	16	9	5	4	3	7	0	0	0.5	1	0	1	0	0.8	0	0	0	0
6028921	G	T	T	T	T	T	T,A	0.444444	1	1	1	1	1	9	2	2	10	4	9	0	0	0.875	1	0.6	1	0	0.727273	0	0	0	0
14492698	G	A	A	A	A	A	A	0.777778	1	1	1	1	1	9	8	25	15	14	9	0.285714	0.5	1	0	0	0	0.5	0	1	1	0	0.25
10100594	C	T	T	T	T	T	T	0.33	1	1	1	1	1	100	52	77	132	33	114	0	0.8125	0.276316	1	1	1	0	0	0	0	0	0
59688857	G	A	A	A	A	A	A	0.352941	0.454545	0.461538	0.75	0.846154	1	17	22	13	12	13	4	0	1	0	0	1	0	0	0	0	0	0	0.625
42315541	C	T	T	T	T	T	T	0.557692	0.311111	1	1	0.9375	0.53125	52	45	21	26	32	64	0	1	0	0.375	0.375	0	0.548387	0	0	0	0.266667	0.533333
10100347	G	A	A	A	A	A	A	0.888889	1	1	1	1	1	9	15	25	15	10	12	0	1	0.65	1	1	1	0	0	0	0	0	0
99918240	C	T	T	T	T	T	T	1	1	1	1	1	1	12	8	35	62	3	45	1	0	0	0	1	1	0	1	0.761905	0	0	0
63645078	A	T	T	T	T	T	T	0.866667	1	0.909091	0.782609	1	0.846154	15	8	11	23	7	13	0	0	1	1	1	0	0	0	0	0	0.666667	0.5
27326810	T	C	C	C	C	C	C	1	0.666667	0.333333	0.375	0.666667	0.5	8	3	6	8	6	4	0	0	0.25	0	0	0	0.541667	0.4	0.210526	0	0.333333	0.571429
68633805	T	C	C	C	C	C	C	0.666667	0.590909	1	1	0.266667	0.666667	21	22	5	5	15	9	0	0.444444	0.3125	0.6	0	1	0	0	0	0	0	0.6
53847772	C	T,A	T	T	T	T	T	1	1	1	1	0.4	1	25	15	13	23	5	15	1	0.666667	0	0.666667	1	0	0	0	0.388889	0.444444	0	0
112181443	A	G	G	G,T	G	G	G	1	0.5	1	1	1	1	7	4	5	9	4	2	0	1	0	0	0	0	0	0.6	1	1	0.666667	0
35194286	C	A	A	A	A	A	A	0.597938	1	0.527778	0.547368	1	0.56875	194	145	108	190	121	160	0	0	0	0.5	0	0	0	0.521472	0.423077	0.566176	0.476821	0.522388
35870952	G	A	A	A	A	A	A	0.486842	0.453403	0.988971	0.985371	0.998804	0.455793	1368	955	544	957	836	656	0.412951	0.397671	0.45733	0.44227	0.501603	0	0.478997	0.447099	0	0	0	0
6096417	A	G	G	G	G	G	G	0.591837	0.508772	0.534884	0.655949	0.573529	0.970588	49	57	86	311	68	102	0	0.921053	0	0	0	0	0	0.684211	0	0	0	1
27308305	T	C	C	C	C	C	C	0.236842	1	1	1	0.347826	0.8	38	34	6	28	23	15	0	1	0.842105	0.375	0.272727	0.666667	0	0	0	0	0	0
37993738	A	G	G	G	G	G	G	0.833333	0.847826	0.911111	0.945055	0.338983	0.873239	84	46	45	91	59	71	0.5	0.405941	0.86747	0	0.393939	0	0.926471	0	0	0	0	0.428571
86297403	C	G	G	G	G	G	G	1	0.458333	0.529412	0.679245	0.3	1	15	48	17	53	20	34	0	0.909091	0.363636	0.46875	0	1	0	0	0	0	0	0
73642431	A	C	C	C	C	C	C	0.232558	1	0.875	0.821429	0.863636	0.181818	43	7	24	28	22	22	0.25	1	1	0	0	0.5	0	0	0	0	0	0
86713461	G	C	C	C	C	C	C	0.636364	1	1	0.996855	0.496894	0.479381	352	306	181	318	161	194	1	0	0.482625	0	0	0	0	0.485714	0.394737	0.555556	0.468468	0
84328055	A	G	G	G,T	G	G	G	1	1	1	1	1	1	3	2	2	2	2	2	0	0	1	1	0	0	0	0	1	1	0.777778	0
12712534	G	A	A	A	A	A	A	1	1	1	1	1	1	11	3	9	15	9	14	0	1	0	0.777778	0	0	1	0	0	1	1	0
43423538	G	T	T	T	T	T	T	1	0.291667	0.933333	0.894737	0.368421	0.642857	31	24	15	19	19	14	0	1	0.666667	0.384615	0	0	0.393939	0	0	0	0.466667	0
6067638	C	A	A	A	A	A	A	0.571429	0.857143	0.777778	0.774194	1	0.948718	14	7	9	31	11	78	0	1	0.533333	0.6	0.390244	0.333333	0.380952	0.475	0	0	0	0
53668256	G	T	T	T	T	T	T	0.607477	0.590476	1	0.976744	0.676471	1	107	105	71	86	68	48	0.428571	0	0.576923	0	1	0.630435	1	0	0	0	0	0
44953235	G	T	T	T	T	T	T	0.625	0.75	0.5	0.464286	0.793103	0.784314	8	8	14	28	29	51	1	0	0.285714	0	0.416667	0	0.4	0	0	0	0.6	0
22124949	G	T,A	T	T	T	T	T	1	0.5	1	0.8	1	0.333333	5	10	5	10	2	6	0	0	0	0	1	0.8	0.625	0	0	1	0	0
6003949	C	T	T	T	T	T	T	0.928571	1	0.965517	0.967742	1	1	14	25	29	31	16	45	0	1	0	0	0	0	0	1	0	0.916667	1	0.740741
106792896	C	T	T	T	T	T	T	1	1	1	1	0.96	0.266667	38	43	17	25	25	15	0	0.214286	0	0.45	0	0.733333	1	0.625	0	0	0	1
6084247	T	C	C	C	C	C	C	0.578947	0.947368	0.756757	0.680851	0.40625	0.830508	38	19	37	94	32	118	0	0.666667	0	0	0	0	0	0.8	0	0.571429	0.210526	0.75
6038153	G	T	T	T	T	T	T	0.484991	1	0.99916	0.997363	1	1	1066	788	1190	1517	685	767	0	0.990338	0	0.23319	0	0.357692	0	1	0	0.981439	0.348	0.37074
31965075	A	C	C	C	C	C	C	1	1	1	1	1	1	5	7	2	6	6	2	0	1	1	1	0	0.4	0	0	0	0.4	1	0
32611152	T	C	C	C	C	C	C	1	1	1	1	1	1	5	5	3	10	3	18	0	0	0	0	1	0	1	0	1	0	1	0.8
99920112	T	C,G	C	C	C	C	C	1	1	1	1	1	1	5	2	1	11	5	19	0	0	0	0	1	1	0	1	1	0	0.8	0
71274585	G	A	A	A	A	A	A	0.481481	1	1	1	0.583333	0.666667	27	7	2	14	12	3	0	0	0	0.666667	0	0	0	1	1	0.4375	0.428571	0
5857453	T	A	A	A	A	A	A	0.551724	0.473684	0.912088	0.982857	0.55	0.51938	29	19	91	175	20	129	0	0.833333	0.311111	0.225806	0.32	0.588235	0	0.514286	0	0	0	0
95418828	C	G	G	G	G	G	G	0.875	1	1	1	1	1	16	16	19	32	4	16	0	1	0.428571	0	0	0	1	0	0	1	0.5	0.75
4533924	A	G	G	G	G	G	G	0.994536	0.666667	0.378378	0.332278	0.994382	1	183	87	185	316	178	470	1	0	0	0	0.449275	1	0.387283	0	0	0.333333	0	0
5874667	T	C	C	C	C	C	C	0.4	0.333333	0.44186	0.310345	0.645161	0.494737	5	6	43	87	31	190	0	0.6	0.220588	0	0	0.276596	0	0.333333	0	0	0	0
4533919	C	G	G	G	G	G	G	1	0.639535	0.407609	0.327922	0.994505	1	182	86	184	308	182	459	1	0	0	0	0.459854	1	0.385965	0	0	0.32973	0	0
92411844	T	G	G	G	G	G	G	0.666667	0.5	0.75	0.714286	0.666667	0.6	6	4	8	7	6	5	0	0.1875	0.3	0.285714	0.222222	0	0	0.153846	0	0.333333	1	0.222222
85510801	A	G	G	G	G	G	G	0.625	1	1	0.9	1	1	8	11	6	10	3	3	0	0	0	0	0	0	0.666667	1	1	0.666667	1	0
4533941	C	A	A	A	A	A	A	0.97561	0.688172	0.288889	0.322086	0.982036	0.970917	164	93	180	326	167	447	0.986111	0	0	0	0.413793	0.984211	0.347305	0	0	0.306533	0	0
27647131	G	C	C	C	C	C	C	0.3375	0.907563	0.852941	0.925373	0.873418	0.94	240	119	34	67	79	50	0.411765	0.490196	0.720721	0.438596	0.459016	0.372549	0	0	0	0	0	0.754717
527654	T	C	C	C	C	C	C	0.75	0.5	0.391304	0.428571	1	1	20	12	23	28	18	29	0.636364	0	0.235294	0.439024	0.571429	1	0	0	0	0	0	0
70948247	A	T	T	T	T	T	T	0.75	0.857143	1	1	0.529412	1	8	7	4	4	17	30	0	0	0.6	0.75	0	0	0	1	0	0	0.6	1
6111910	C	G	G	G	G	G	G	0.857143	0.333333	0.625	0.545455	0.875	0.431818	7	6	8	44	24	44	0	0.8	0.6	0.333333	0	0	0	0.75	0	0	0	0
53669474	G	A	A	A	A	A	A	0.608696	0.548872	1	1	0.488889	1	115	133	45	76	45	50	0.55	0	0.427083	0	0.935484	0.55	1	0	0	0	0	0
6105098	T	C	C	C	C	C	C	0.818182	0.916667	0.818182	0.434783	0.5	0.695652	11	12	11	23	4	23	0	0	0	0	1	0	1	0	1	0	0	0
5844596	G	C	C	C	C	C	C	1	1	1	1	1	1	5	4	6	27	9	33	0	0	1	0	1	1	1	0	0	0	0.372093	0.444444
37993735	G	A	A	A	A	A	A	0.784091	0.860465	0.891304	0.892473	0.296875	0.8	88	43	46	93	64	80	0.428571	0.383178	0.82716	0	0.42029	0	0.897059	0	0	0	0	0.38806
99903676	A	C	C	C	C	C	C	1	0.666667	1	1	0.555556	1	9	6	3	12	9	5	0	0	0	0	1	1	0	0	1	0	0.666667	0.375
5133189	G	A	A	A	A	A	A	0.571429	0.777778	1	1	0.4	1	7	9	14	27	15	20	0	1	0.434783	0.457143	0	0.296296	0.714286	0.666667	0	0	0	0
22099207	G	A	A	A	A	A	A	0.666667	1	0.941176	1	1	1	33	23	17	11	23	30	1	0	1	1	0.388889	0	0.266667	0.5	0	0	0	0.272727
931009	T	C	C	C	C	C	C	0.392857	0.730769	1	1	0.277778	0.647059	28	26	10	16	18	17	0.555556	0	1	0	0	0.863636	0.45	0	0	0	0	0
10100434	G	A	A	A	A	A	A	0.447236	1	1	1	1	1	199	137	204	272	74	208	0.5	0.385542	0.41791	1	0.979167	0.986667	0	0	0	0	0	0
7105913	C	A	A	A	A	A	A	0.9375	0.5	1	1	1	0.888889	16	8	4	5	5	9	0	1	0.285714	1	0	0	0	0	0	0.285714	0.8	0.777778
931925	G	A	A	A	A	A	A	0.472222	0.407407	1	1	0.454545	0.8	36	27	22	23	33	25	0.818182	0	0.906977	0	0	0.59375	0.64	0	0	0	0	0
21244806	C	A	A	A	A	A	A	0.394737	0.978261	0.931818	0.983871	0.435897	1	76	46	44	124	39	106	0	0.477273	0	0	0	0	1	0.304348	0.6	0.375	0.435897	0.357143
7104389	T	C	C	C	C	C	C	1	0.833333	1	1	1	1	15	6	7	11	10	3	0	1	0.555556	1	0	0.666667	0	0	0	0.545455	0.266667	0.625
845828	C	G	G	G	G	G	G	1	1	1	1	1	1	92	48	25	36	77	48	0.64	0.539474	0	0.508772	1	1	0.512821	0	0	0	0	0.625
53669206	A	G	G	G	G	G	G	0.611429	0.562874	1	1	0.553571	1	175	167	64	140	56	83	0.577465	0	0.55414	0	1	0.423077	1	0	0	0	0	0
16405958	T	G	G	G	G	G	G	0.4	1	0.518519	0.5	1	0.266667	25	16	27	36	20	15	0	0	0	0.487179	0.4	0.47619	0	0	0.222222	0.347826	0.578947	0
51508135	C	A	A	A,T	A	A	A	1	0.230769	0.75	0.555556	1	0.636364	6	13	4	9	8	11	0	0	1	0.5	0	0	0	0.5	0	1	0	0
11650849	T	C	C	C	C	C	C	0.454545	0.375	1	1	0.5	0.736842	33	64	42	62	30	19	0.52459	0	0.6	0	0.352941	0	0.369565	0	0.266667	0	0.310345	0.472727
72772664	G	A	A	A	A	A	A	0.6	1	1	1	0.666667	1	15	9	9	7	6	4	0	0	1	0	0.5	1	0	1	0	0	0.6	0
62339331	T	A	A	A	A	A	A	1	1	1	1	1	1	6	10	6	5	3	6	0	1	1	1	0	0	0	0	0	0	0.833333	1
6885134	T	C	C	C	C	C	C	1	1	1	1	1	0.666667	6	10	4	8	8	9	0	0	0	1	0	1	0.5	0	1	1	0	0
12042138	T	G	G	G	G	G	G	1	1	1	1	1	1	3	5	6	5	6	3	0	0	1	0	0	1	0	0	1	0	1	0.833333
13679021	C	T	T	T	T	T	T	1	1	0.833333	1	1	1	2	3	6	8	2	16	1	0	0	1	0	1	0	0	0	0.666667	0	1
23685786	C	A	A	A	A	A	A,G	0.483871	1	0.222222	0.230769	1	1	31	32	9	13	20	19	0.5	1	0	0.571429	0	0	0	0.7	0	0	0	0
5869371	T	G	G	G	G	G	G	0.8	0.526316	0.542857	0.733333	0.5	0.181818	5	19	35	30	20	22	0	0.533333	0.547619	0.444444	0	0	0	0.595745	0	0	0	0
16074576	A	G	G	G	G	G	G	1	0.6	1	1	1	1	44	25	7	24	14	16	0	0.3	1	0.5	0.833333	0.266667	0.55	0.363636	0	0	0	0.625
40963384	T	C	C	C	C	C	C	1	1	1	1	1	1	35	45	29	48	19	29	0	0.428571	0.421053	0.486486	0	1	0	0.545455	0	0.545455	1	0.411765
6800971	C	T	T	T	T	T	T	1	0.6	1	1	1	0.377049	12	15	27	36	9	61	0	1	0	0.447368	0	0	0	0	0.480769	0.5	1	0.388889
39805275	G	C	C	C	C	C	C	0.373494	0.418605	0.851064	0.690909	0.678571	0.444444	83	43	47	55	28	9	0	0	0	0	0	0.529412	0.282609	0.485294	0	0	1	0
62002731	A	G	G	G	G	G	G	0.48913	0.517647	0.632653	0.516484	0.416667	0.525641	184	255	49	182	120	78	0	0	0	0.548387	0	0.333333	0.483871	0	0	0.573034	0	0
53668554	G	A	A	A	A	A	A	0.505263	0.534091	1	1	0.680851	1	95	88	23	91	47	34	0.538462	0	0.539326	0	0.962963	0.52	1	0	0	0	0	0
39272996	G	C	C	C	C	C	C	0.285714	1	1	1	1	0.944444	7	5	3	10	4	18	0	0	0.833333	0.6	0	0.666667	0	0.4	0	0	1	0.571429
100485441	C	T	T	T	T	T	T	1	0.490909	0.5	0.567568	0.509434	1	86	55	48	74	53	43	1	0	1	0	0	0	0.434783	0	0	0	0.47619	0
23687111	C	T	T	T	T	T	T	0.476562	0.51087	0.264706	0.242424	0.986842	1	128	92	34	66	76	112	0.45614	1	0	0.362637	0	0	0	0.507246	0	0	0	0
6928911	G	A	A	A	A	A	A	1	0.363636	1	0.8	1	1	2	11	8	15	7	13	0	0	0	0	0.666667	0	1	0	0.5	0.8	0.666667	0.375
89714302	G	C	C	C	C	C	C	0.534884	1	1	1	1	0.493976	43	10	31	47	10	166	0	0	0	0	0.3	0.454545	0.550725	0.5	1	0.205882	0.333333	0.529412
114454622	T	C	C	C	C	C	C	0.714286	1	0.666667	0.857143	0.333333	0.333333	14	5	6	21	6	9	0	1	0.625	0	0	0	0	0	0	0.75	0	0.375
117844154	T	A	A	A	A	A	A	0.571429	0.652174	1	1	0.75	1	14	23	27	14	8	2	0.222222	0	0.461538	0.375	0.75	0	0.555556	0	0	0.454545	0	1
81655181	C	T	T	T	T	T	T	1	1	1	1	1	1	4	5	17	3	2	10	0	1	0	0	0	0	0	1	0	1	1	0.846154
527752	A	G	G	G	G	G	G	0.384615	0.8125	0.631579	0.555556	1	1	13	32	19	18	15	47	0.571429	0	0.545455	0.575758	0.538462	1	0	0	0	0	0	0
622763	A	G	G	G	G	G	G	0.243243	0.222222	0.230769	0.307692	0.538462	0.15	37	36	13	13	13	20	0	0	0	0	0	0	0	0	0	0	0.227273	0.3125
23252072	T	C	C	C	C	C	C	1	0.428571	0.75	0.2	0.25	0.272727	3	7	8	10	8	11	0	0.75	1	0	0	0	0	0	0	0	0	0
3577409	G	A	A	A	A	A	A	0.444444	1	1	0.444444	0.333333	0.428571	18	9	4	9	9	7	0	0.333333	0	0	0.666667	0.5	0	0	1	0	0	0
5850719	A	T	T	T	T	T	T,C	0.4	1	0.75	1	1	1	5	1	4	7	3	13	0	1	0	0	1	1	0	1	0	0	0	0
78037062	G	A	A	A	A	A	A	1	0.5	0.75	1	1	1	3	4	4	3	9	23	1	0	0	0	0	0	1	0	0.6	0	0.5	1
20577459	A	G	G	G	G	G	G	0.315789	1	1	1	1	1	19	11	9	8	3	7	0	0.5	0.666667	0	1	0	0	1	0	0	0	1
56816014	T	C	C	C	C	C	C	0.448276	1	1	1	1	1	29	13	2	18	17	6	0	1	0	0	0.5	1	0	0.8	0	1	0	0
846426	C	T	T	T	T	T	T	1	1	1	1	1	1	79	110	23	49	72	28	0.571429	0.607595	0	0.557692	1	1	0.534483	0	0	0	0	0.580645
113764217	G	A	A	A	A	A	A	0.375	0.666667	1	1	0.5	1	16	6	4	13	4	6	0	0	1	0	0	0	1	0.571429	0	0	0.6	0.222222
35872234	G	A	A	A	A	A	A	0.42315	0.403226	0.992424	0.99449	1	0.615854	527	310	132	363	412	328	0.510204	0.466346	0.491632	0.393617	0.482456	0	0.469388	0.467742	0	0	0	0
2169939	T	C	C	C	C	C	C	0.609756	0.428571	0.333333	0.460317	1	0.645833	41	21	21	63	28	48	0	0	0.473684	1	0.857143	0	0	0	0	0	0	0
49474776	C	T	T	T	T	T	T	1	1	1	1	0.785714	1	54	18	33	89	28	24	1	0.727273	0.692308	0	1	0.25	0.636364	0.333333	0	0	0	0
107417097	G	C	C	C	C	C	C	1	1	1	1	1	1	4	9	2	15	3	2	0	1	1	1	0	0	1	0.4	0	0	0	0.454545
77891501	A	G	G	G	G	G	G	1	1	1	1	0.529412	0.277778	27	10	4	9	34	18	0	0.9	0	0.428571	0	0	0.583333	0	0	0	1	0.75
53669472	A	G	G	G	G	G	G	0.621849	0.55303	1	1	0.488889	1	119	132	45	77	45	52	0.560976	0	0.446809	0	0.965517	0.545455	1	0	0	0	0	0
39050395	C	T	T	T	T	T	T	1	1	0.8	0.540541	0.285714	0.458333	19	8	10	37	7	24	1	0	0.428571	0	0.444444	0	0.666667	0	0	0	0	0.4
4717063	G	T	T	T	T	T	T	1	0.25	1	1	1	1	28	12	6	23	9	43	1	0	0.777778	0.411765	0.25	1	0	0	0	0.666667	0	0
14093299	G	A	A	A	A	A	A	1	1	1	1	1	1	18	11	2	6	2	7	0	0	0	0	1	0.857143	1	1	0	1	0	0
8786316	G	A	A	A	A	A	A	1	0.470588	0.6	0.354839	1	1	33	34	10	31	31	34	0.416667	1	0	0	0	0	0.4	0.181818	0.285714	0	0	1
29368997	C	T	T	T	T	T	T	0.4	0.384615	0.5	0.545455	0.533333	0.333333	10	13	14	22	15	27	0	1	0	0.555556	0	0	0	0	0	0	0	0
112356310	A	G	G	G	G	G	G	0.533333	0.454545	0.571429	0.541667	0.652174	0.972222	30	44	21	24	23	36	0.538462	0	0	0.409091	0.647059	0	0	0.444444	0	0	0.545455	0
26101004	T	G	G	G	G	G	G	0.830508	0.775	0.4375	0.59375	0.4	0.85	59	40	32	32	55	40	0	0.8	0.137931	0	0.444444	0.75	0	0	0	0.615385	0	0
63894330	T	C	C	C	C	C	C	1	1	0.5	0.571429	1	1	2	10	4	14	5	2	0	0	1	1	1	0.6	0	0	0	0	0	0.333333
4534031	C	T	T	T	T	T	T	1	0.809524	0.268908	0.355102	1	1	112	63	119	245	164	305	1	0	0	0	0.435897	1	0.482456	0	0	0.378049	0	0
6042520	A	G	G	G	G	G	G	0.631579	1	1	1	1	1	19	26	31	55	29	136	0	1	0.777778	0.625	0.684211	0.5	0	0.909091	0	0	0	0
86712982	C	T	T	T	T	T	T	0.502793	1	0.996154	0.983165	0.592814	0.542289	358	205	260	297	167	201	0.97561	0	0.565625	0	0	0	0	0.559406	0.432432	0.577236	0.371622	0
78645241	A	G	G	G	G	G	G	0.5	1	1	1	1	0.347826	22	14	4	22	42	23	0	0	0	0.714286	0	0	0	1	0	1	1	0
10866931	A	G	G	G	G	G	G	1	0.894737	1	1	0.428571	0.789474	14	19	5	6	7	19	0	1	1	0.882353	0	0	0	0	0	0	0.538462	0.56
114313720	T	G	G	G	G	G	G	0.428571	0.48	1	1	1	0.5	14	25	9	11	6	4	0	1	0	0	0	0.666667	1	0	0	0	0.4	0.210526
23271992	C	T	T	T	T	T	T	1	0.564516	1	1	1	0.996805	172	62	74	188	103	313	0	0.512821	0	0.573171	0.953488	0	0	0.615385	0	0.315789	1	0.459459
25846943	T	A	A	A	A	A	A	0.75	1	0.833333	1	1	1	4	18	6	30	9	27	1	1	1	0	0	0	0	0	0	0	0.5	0.954545
7103707	A	T	T	T	T	T	T	0.9	0.428571	1	1	1	1	10	28	4	13	6	6	0	1	0	1	0	0.666667	0	0	1	0	0.2	0.333333
67795928	C	T	T	T	T	T	T	1	1	1	1	1	1	6	5	14	22	7	15	0	0.5	0.8	1	0	0	0	0	1	0.571429	0	1
147421249	T	C	C	C	C	C	C	1	0.642857	1	1	0.481481	0.46875	149	42	32	73	135	64	0.333333	0	0.638889	0	0	0.703704	0	0.322581	0	0.466667	1	0
53306872	G	A	A	A	A	A	A	0.535714	0.615385	0.842105	0.8	1	0.736842	28	26	19	20	3	19	0.290323	0	0.821429	0	0.857143	0.315789	0.4	0	0.333333	0.384615	0	0
6195110	T	C	C	C	C	C	C	1	1	1	1	0.571429	1	9	7	14	6	7	2	0	0	1	1	0	0.444444	1	0	0	0	0	1
53668837	T	C	C	C	C	C	C	0.491525	0.514706	1	0.984848	0.742857	1	59	68	57	66	35	31	0.6	0	0.56962	0	1	0.4375	1	0	0	0	0	0
6132592	G	A	A	A	A	A	A	0.807339	1	1	0.992308	0.955556	1	109	130	161	260	45	169	0	1	0	0	0	0	0	1	0.179487	0.696203	0.884615	0.868421
5706188	T	C	C	C	C	C	C	0.96	1	0.942857	0.981308	0.85	1	25	37	70	107	20	52	0	0.9375	0	0	0	0	0	0.980583	0.272727	0.826087	0.694915	0.896552
73627183	T	C	C	C	C	C	C	0.625	1	1	1	1	0.5	8	7	5	6	4	26	1	0	0	1	1	0	0	0	0	0	1	0
86698111	G	A	A	A	A	A	A	0.558952	1	1	0.992126	0.562963	0.623932	229	131	103	127	135	117	1	0	0.653153	0	0	0	0	0.502392	0.4125	0.566116	0.47929	0
16782065	T	C	C	C	C	C	C	0.584158	1	1	1	0.38	1	101	106	20	71	50	78	0.692308	0.285714	0	0	0	0	1	0	1	0.477273	0	0.385714
48984912	G	A	A	A	A	A	A	1	1	1	1	0.551724	0.263158	89	60	35	70	29	19	0	1	0	0.369565	0	0	0.535211	0	0	0.603175	0.6	0.585366
20831023	A	C	C	C	C	C	C	1	0.4	1	1	1	1	16	15	9	10	12	8	0	1	0	0	0.666667	0.285714	0	1	0	0.727273	0	0.6
62475858	A	G	G	G,T	G	G	G	0.975	1	1	1	1	1	40	21	13	24	5	23	0	0	0	1	0	1	1	0	0	0.857143	1	0
6094886	C	T	T	T	T	T	T	0.911661	0.923775	0.876313	0.833017	0.844237	0.992333	283	551	857	1581	321	913	0	0.99639	0	0	0	0	0	0.951079	0	0.99005	0.333819	0.992574
35872065	C	T	T	T	T	T	T	0.525773	0.404959	0.993007	0.989218	0.995506	0.505938	485	242	143	371	445	421	0.555556	0.436214	0.493243	0.413333	0.425676	0	0.53222	0.441489	0	0	0	0
[truncated: 29,564 more rows]
