# Supplementary material for: Single nucleotide polymorphism discovery in bovine liver using RNA-seq technology
Source: PLoS One. 2017 Feb 24;12(2):e0172687. doi: 10.1371/journal.pone.0172687 (PMC5325534; doi:10.1371/journal.pone.0172687)
Supplement: S21 Table — (XLSX) [file pone.0172687.s021.xlsx]

## Sheet: Hereford
S21 Table: SNPs filtering data set of Hereford breed.
SNP locus	REF	CP 35	CP 36	CP 37	CP 38	CP 39	CP 40	SNP% CP35	SNP% CP36	SNP% CP37	SNP% CP38	SNP% CP39	SNP% CP40	READS CP35	READS CP36	READS CP37	READS CP38	READS CP39	READS CP40	SNP% CP19	SNP% CP20	SNP% CP21	SNP% CP22	SNP% CP23	SNP% CP24	SNP% CP27	SNP% CP28	SNP% CP29	SNP% CP30	SNP% CP31	SNP% CP32
64485917	G	A	A	A	A	A	A	1	1	1	1	1	1	4	5	2	6	3	3	0	0	0	0	0	0	0	0	0	0	0	0
66653311	A	G	G	G	G	G	G	1	1	1	1	1	1	2	2	2	2	2	2	0	0	0	0	0	0	0	0	0	0	0	0
11813040	C	T	T	T	T	T	T	1	1	1	1	1	1	2	2	5	4	3	4	0	0	0	0	0	0	0	0	0	0	0	0
102525893	T	C	C	C	C	C	C	1	1	1	1	1	1	3	3	14	2	6	6	0	0	0	0	0	0	0	0	0	0	0	0
118303215	A	G	G	G	G	G	G	1	1	1	1	1	1	3	4	2	2	2	2	0	0	0	0	0	0	0	0	0	0	0	0
103627626	T	G	G	G	G	G	G	1	1	1	1	1	1	4	4	2	8	8	2	0	0	0	0	0	0	0	0	0	0	0	0
103627643	A	G	G	G	G	G	G	1	1	1	1	1	1	2	3	3	6	5	2	0	0	0	0	0	0	0	0	0	0	0	0
103627655	C	G	G	G	G	G	G	1	1	1	1	1	1	2	4	3	6	5	2	0	0	0	0	0	0	0	0	0	0	0	0
7578990	A	G	G	G	G	G	G	1	1	1	1	1	1	16	12	6	7	11	12	0	0	0	0	0	0	0	0	0	0	0	0
14883840	C	T	T	T	T	T	T	0.75	1	1	1	1	1	8	4	6	5	4	7	0	0	0	0	0	0	0	0	0	0	0	0
75501568	G	T	T	T	T	T	T	1	1	1	1	1	0.714286	7	10	10	1	3	7	0	0	0	0	0	0	0	0	0	0	0	0
10403308	C	T	T	T	T	T	T	1	1	1	1	1	0.625	2	4	2	2	3	8	0	0	0	0	0	0	0	0	0	0	0	0
44104533	T	C	C	C	C	C	C	1	1	1	1	1	0.6	2	2	22	2	2	5	0	0	0	0	0	0	0	0	0	0	0	0
104349967	C	G	G	G	G	G	G	0.6875	0.888889	1	1	1	1	16	9	11	12	50	27	0	0	0	0	0	0	0	0	0	0	0	0
95546583	G	T	T	T	T	T	T	0.916667	1	0.631579	1	1	1	12	27	19	35	29	28	0	0	0	0	0	0	0	0	0	0	0	0
31925630	A	G	G	G	G	G	G	1	1	1	1	1	1	7	5	6	6	2	2	0.5	0	0	0	0	0	0	0	0	0	0	0
31925640	G	A	A	A	A	A	A	1	1	1	1	1	1	7	4	5	4	2	2	0.5	0	0	0	0	0	0	0	0	0	0	0
93082771	C	T	T	T	T	T	T	0.5	1	1	1	1	1	4	5	9	4	2	2	0	0	0	0	0	0	0	0	0	0	0	0
83121855	C	T	T	T	T	T	T	1	1	1	1	1	1	6	12	7	4	8	8	0	0.5	0	0	0	0	0	0	0	0	0	0
89336105	G	A	A	A	A	A	A	0.6	1	1	1	1	0.8	5	2	6	5	12	5	0	0	0	0	0	0	0	0	0	0	0	0
11079570	T	C	C	C	C	C	C	1	1	1	1	1	1	54	58	60	59	79	113	0.640777	0	0	0	0	0	0	0	0	0	0	0
69378530	G	A	A	A	A	A	A	1	1	1	1	1	1	3	2	3	5	13	6	0	0	0	0	0	0.642857	0	0	0	0	0	0
29639553	G	C	C	C	C	C	C	1	1	1	1	1	1	5	2	6	2	2	4	0	0	0	0	0	0.666667	0	0	0	0	0	0
31925638	A	T	T	T	T	T	T	1	1	1	1	1	1	8	4	5	5	2	2	0.666667	0	0	0	0	0	0	0	0	0	0	0
31925639	T	G,A	G	G	G	G	G	1	1	0.8	1	1	1	7	4	5	4	2	2	0.5	0	0	0	0	0	0	0	0	0	0	0
22413551	C	G	G	G,T	G	G	G	1	0.5	1	1	1	0.75	9	2	12	3	2	4	0	0	0	0	0	0	0	0	0	0	0	0
50424533	G	T	T	T	T	T	T	1	1	1	1	1	1	5	2	11	6	5	13	0	0	0	0	0	0	0	0	0	0.75	0	0
21220371	A	G	G	G	G	G	G	0.6	1	1	1	1	0.625	15	6	3	2	2	8	0	0	0	0	0	0	0	0	0	0	0	0
21220375	T	C	C	C	C	C	C	0.588235	1	1	1	1	0.625	17	6	2	2	2	8	0	0	0	0	0	0	0	0	0	0	0	0
28923071	T	C	C	C	C	C	C	1	1	1	0.666667	0.5	1	4	2	7	3	6	3	0	0	0	0	0	0	0	0	0	0	0	0
511723	G	A	A	A	A	A	A	1	1	1	1	1	1	36	40	14	26	32	41	0	0.275	0	0	0	0	0	0	0.583333	0	0	0
79293724	A	G	G	G	G	G	G	0.333333	0.8	1	1	1	1	6	5	3	2	2	3	0	0	0	0	0	0	0	0	0	0	0	0
21220330	C	T	T	T	T	T	T	0.5	1	1	1	1	0.625	6	5	4	3	3	8	0	0	0	0	0	0	0	0	0	0	0	0
53966283	A	C	C	C	C	C	C	1	0.606061	0.471698	1	1	1	50	33	53	16	18	51	0	0	0	0	0	0	0	0	0	0	0	0
7576693	C	A	A	A	A	A	A	0.352941	1	1	1	1	0.695652	34	8	10	6	5	23	0	0	0	0	0	0	0	0	0	0	0	0
26278860	C	T	T	T	T	T	T	0.833333	1	1	1	1	0.5	6	3	2	2	9	6	0	0	0	0	0	0	0	0	0	0	0	0.285714
10272950	A	G	G	G	G	G	G	1	0.5	1	1	1	0.545455	3	8	5	5	15	11	0	0	0	0	0	0	0	0	0	0	0	0
101404929	C	T	T	T	T	T	T	1	1	0.863636	1	1	1	43	30	22	50	35	28	0.434783	0	0	0	0	0	0	0.395833	0	0	0	0
10271949	C	T	T	T	T	T	T	1	0.722222	0.95	1	1	0.34375	9	18	20	5	18	32	0	0	0	0	0	0	0	0	0	0	0	0
51617568	A	G,T	G	G	G	G	G	1	0.7	1	0.714286	1	0.6	9	10	3	14	9	5	0	0	0	0	0	0	0	0	0	0	0	0
110373625	A	G	G	G	G	G	G	0.608696	1	1	1	1	1	23	26	17	27	18	36	0	0	0	0.416667	0	0	0.181818	0	0	0	0	0
18268202	G	A	A	A	A	A	A	1	0.833333	0.6	0.571429	1	1	13	6	5	7	2	4	0	0	0	0	0	0	0	0	0	0	0	0
83116780	G	A	A	A	A	A	A	0.833333	1	1	0.666667	1	1	6	2	2	3	2	3	0.5	0	0	0	0	0	0	0	0	0	0	0
64485772	C	G	G	G	G	G	G	1	1	1	1	1	1	4	6	6	5	2	3	0	0	0	0	0	0	1	0	0	0	0	0
64485774	A	G	G	G,T	G	G	G	1	1	1	1	1	1	5	6	5	5	2	3	0	0	0	0	0	0	1	0	0	0	0	0
30694295	A	T	T	T	T	T	T	1	1	1	1	1	1	2	4	4	2	2	3	0	0	0	0	0	0	0	0	0	1	0	0
30694308	G	T	T	T	T	T	T	1	1	1	1	1	1	2	4	4	2	2	2	0	0	0	0	0	0	0	0	0	1	0	0
54108039	G	A	A	A	A	A	A	1	1	1	1	1	1	3	2	6	3	6	5	0	0	0	0	0	0	0	0	1	0	0	0
78975395	T	C	C	C	C	C	C	1	1	1	1	1	1	4	8	4	4	3	2	0	0	0	0	0	0	0	0	0	0	1	0
78975433	A	G	G	G	G	G	G	1	1	1	1	1	1	4	6	4	3	3	2	0	0	0	0	0	0	0	0	0	0	1	0
58648987	A	G	G	G	G	G	G	1	1	1	1	1	1	2	3	2	2	5	9	0	0	0	0	0	0	0	0	0	0	0	1
7935316	G	A	A	A	A	A	A	1	1	1	1	1	1	7	9	3	7	6	6	0	0	0	1	0	0	0	0	0	0	0	0
25176340	T	C	C	C	C	C	C	1	1	1	1	1	1	5	5	26	5	23	32	0	0	0	0	1	0	0	0	0	0	0	0
42600920	G	A	A	A	A	A	A	1	1	1	1	1	1	3	2	11	2	3	2	0	0	0	0	0	0	0	0	0	0	1	0
10066138	G	A	A	A	A	A	A	1	1	1	1	1	1	2	2	10	4	5	2	0	0	0	0	0	0	0	0	0	0	0	1
22850514	T	C	C	C	C	C	C	1	1	1	1	1	1	4	2	9	2	13	2	0	0	0	0	0	0	0	0	0	1	0	0
4866154	G	T	T	T	T	T	T	1	1	1	1	1	1	2	3	2	2	2	4	0	0	0	0	0	0	0	0	0	0	1	0
49623156	G	T	T	T	T	T	T	1	1	1	1	1	1	8	3	1	1	2	1	0	0	0	0	0	0	0	0	1	0	0	0
119646822	A	C	C	C	C	C	C	1	1	1	1	1	1	3	3	2	4	4	5	0	0	0	0	1	0	0	0	0	0	0	0
117675952	A	G	G	G	G	G	G	1	1	1	1	1	1	3	4	3	5	4	3	1	0	0	0	0	0	0	0	0	0	0	0
34663023	G	T	T	T	T	T	T	1	1	1	1	1	1	6	3	8	3	3	9	0	0	0	0	0	0	0	0	1	0	0	0
59141736	C	T	T	T	T	T	T	1	1	1	1	1	1	2	2	3	2	2	3	0	0	0	0	0	0	0	0	0	0	1	0
8766830	C	G	G	G	G	G	G	1	1	1	1	1	1	4	2	4	3	2	2	0	0	0	0	0	0	0	0	0	0	0	1
67810054	A	G	G	G	G	G	G	1	1	1	1	1	1	2	5	4	2	4	7	0	0	0	0	0	0	0	0	0	0	0	1
28763007	T	C	C	C	C	C	C	1	0.857143	1	0.5	0.636364	1	18	7	5	10	11	19	0	0	0	0	0	0	0	0	0	0	0	0
10272072	C	A	A	A	A	A	A	0.777778	0.5	1	1	1	0.666667	9	12	5	5	15	18	0	0	0	0	0	0	0	0	0	0	0	0
59702198	A	G	G	G	G	G	G	1	0.6	1	1	1	0.333333	3	5	4	4	4	6	0	0	0	0	0	0	0	0	0	0	0	0
84340744	G	A	A	A	A	A	A	1	1	1	1	0.428571	1	3	2	2	2	7	4	0	0.5	0	0	0	0	0	0	0	0	0	0
100498249	A	G	G	G	G	G	G	0.714286	0.823529	1	0.714286	0.666667	1	28	17	25	14	6	21	0	0	0	0	0	0	0	0	0	0	0	0
42616543	G	A	A	A	A	A	A	1	1	1	1	1	1	11	2	7	3	7	5	0	0.5	0	0	0.6	0	0	0	0	0	0	0
34725167	G	T	T	T	T	T	T	0.458084	1	0.974522	1	0.464567	1	334	254	157	258	254	254	0	0	0	0	0	0	0	0	0	0	0	0
93085121	T	G	G	G	G	G	G	0.3	0.588235	1	1	1	1	20	17	8	5	2	6	0	0	0	0	0	0	0	0	0	0	0	0
10487301	A	G	G	G	G	G	G	0.5	1	1	1	1	0.627907	12	10	18	6	20	43	0	0	0	0	0	0	0	0	0	0	0	0.25
89838087	G	A	A	A	A	A	A	1	0.75	1	1	1	1	2	4	16	2	3	3	0.888889	0	0	0	0	0	0	0	0	0	0	0
127769092	A	T	T	T	T	T	T	1	1	1	1	1	1	2	2	5	2	11	18	0	0.5	0	0	0.642857	0	0	0	0	0	0	0
32723051	A	G	G	G	G	G	G	1	0.432432	1	1	1	1	51	37	16	48	51	54	0	0	0	0	0	0	0	0	0.584615	0	0	0
79372367	T	A	A	A	A	A	A	1	1	1	1	1	0.846154	11	8	11	6	6	13	0	0	0	0	0	0	0	1	0	0	0	0
44976042	T	C	C	C	C	C	C	1	1	1	1	1	1	3	3	3	5	2	6	0	0.222222	0	0	0	0.666667	0	0	0	0.272727	0	0
7576822	C	T	T	T	T	T	T	0.466667	1	1	0.571429	1	0.8	15	5	25	7	5	5	0	0	0	0	0	0	0	0	0	0	0	0
70476116	A	T	T	T	T	T	T	1	1	1	1	1	0.5	13	10	9	2	2	4	0	0	0	0	0	0	0.666667	0	0	0	0	0
10271370	C	G	G	G	G	G	G	0.857143	1	0.461538	1	1	0.5	7	3	13	8	3	6	0	0	0	0	0	0	0	0	0	0	0	0
59746833	A	G	G	G	G	G	G	1	1	1	1	1	0.8	4	5	4	4	2	5	0	0	0	0	0	0	0	0	0	0	1	0
48258378	T	C	C	C	C	C	C	1	1	0.8	1	1	1	2	5	10	2	3	3	0	0	0	0	0	0	0	0	0	0	1	0
64550132	T	C	C	C	C	C	C	0.4	0.4	1	1	1	1	10	10	11	7	4	6	0	0	0	0	0	0	0	0	0	0	0	0
117182769	C	T	T	T	T	T	T	0.428571	0.37037	1	1	1	1	14	27	8	9	21	20	0	0	0	0	0	0	0	0	0	0	0	0
11162779	C	T	T	T	T	T	T	1	1	0.5	1	0.857143	1	8	12	14	12	21	37	0.5625	0	0	0	0	0	0	0	0	0	0	0
48598575	T	C	C	C	C	C	C	1	1	1	1	0.35	1	19	20	16	6	20	26	0	0	0	0	0	0	0	0	0.555556	0	0	0
10097217	G	A	A	A	A	A	A	0.714286	1	1	0.545455	1	0.857143	14	12	8	11	10	7	0	0	0	0	0	0	0	0	0	0.333333	0	0
2520314	G	A	A	A	A	A	A	1	1	1	0.7	1	0.625	3	15	3	20	15	16	0	0	0	0	0.5625	0	0	0	0	0	0	0
50795424	C	T	T,A	T	T	T	T	1	1	1	0.6	0.4	1	2	8	11	5	5	7	0	0	0	0	0	0	0	0	0	0	0.25	0
65824060	T	A	A	A	A	A	A	1	1	0.75	1	1	1	2	3	8	3	2	2	0	0	0	0	0	0	0	0	1	0	0	0
76918536	C	T	T	T	T	T	T	1	1	1	0.857143	0.888889	1	9	14	6	7	9	4	0	0	0	0	0	1	0	0	0	0	0	0
10115750	G	T	T	T	T	T	T	0.571429	0.454545	0.714286	1	1	1	7	11	7	11	5	8	0	0	0	0	0	0	0	0	0	0	0	0
107215115	C	G	G	G	G	G	G	0.886792	0.467742	0.83871	1	1	0.979592	53	62	31	151	81	49	0.44	0	0	0	0	0	0	0	0	0	0	0
104351682	G	C	C	C	C	C	C	0.909091	0.818182	1	1	1	1	11	11	9	2	17	19	0	0	0	0	0	0	1	0	0	0	0	0
83121953	T	C	C	C	C	C	C	1	1	1	1	1	1	10	23	22	8	3	11	0	0.285714	0	0	0	1	0	0	0	0	0	0
117178452	A	G	G	G	G	G	G	0.666667	0.666667	0.375	1	1	1	3	3	8	5	4	9	0	0	0	0	0	0	0	0	0	0	0	0
56885835	T	C	C	C	C	C	C	0.982143	0.814815	0.933333	0.968254	0.939394	0.942308	112	54	15	63	33	52	0	0	0	0	0	0	0.878788	0	0	0	0	0
90018799	G	C	C	C	C	C	C	0.6	0.571429	1	1	1	0.526316	5	7	2	5	9	19	0	0	0	0	0	0	0	0	0	0	0	0
86368418	G	A	A	A	A	A	A	1	0.5625	1	1	1	1	12	16	12	4	13	27	0	0	0.5	0.384615	0	0	0	0	0	0	0	0
70459574	C	T	T	T	T	T	T	1	1	1	1	1	1	4	3	8	2	2	4	0	0	0	0	0.333333	0	0	0	0	0	1	0
34714674	G	A	A	A	A	A	A	1	1	1	1	1	1	2	3	4	3	3	2	0	0	0.666667	0.666667	0	0	0	0	0	0	0	0
83822330	C	T	T	T	T	T	T	1	1	1	1	1	1	4	5	4	6	5	6	0	0	0	0	0	0	0	0.363636	0	0	0	1
49724668	T	G	G	G	G	G	G	1	0.35	1	1	0.785714	0.5	12	20	5	8	14	16	0	0	0	0	0	0	0	0	0	0	0	0
70514788	G	A	A	A	A	A	A	1	1	1	1	1	0.75	7	6	5	4	5	8	0	0	0	0	0	0.428571	0	0	0	0.714286	0	0
21737914	A	G	G	G	G	G	G	1	1	1	1	1	1	3	3	4	2	4	2	1	0	0	0	0	0	0	0	0.4	0	0	0
9946531	C	G	G	G	G	G	G	0.8	0.666667	1	1	1	0.625	5	9	5	7	7	8	0	0	0	0	0	0	0	0.5	0	0	0	0
10272456	C	T	T	T	T	T	T	0.625	0.666667	0.846154	1	1	0.448276	8	15	13	6	25	29	0	0	0	0	0	0	0	0	0	0	0	0
3298050	A	G	G	G	G	G	G	1	1	1	1	1	1	4	3	10	7	5	2	0	0	0	0	0	0	0	0	1	0.428571	0	0
64515604	G	A	A	A	A	A	A	0.714286	0.583333	1	1	0.666667	0.6	21	12	13	4	6	5	0	0	0	0	0	0	0	0	0	0	0	0
37554109	C	G	G	G	G	G	G	1	1	0.428571	0.6	0.636364	0.888889	7	12	7	10	11	9	0	0	0	0	0	0	0	0	0	0	0	0
944096	A	G	G	G	G	G	G	1	1	1	0.557377	1	1	83	86	54	61	59	82	0	0	0	0	0	0	0	0.44186	0	0	0	0.571429
19281666	C	G	G	G	G	G	G	1	1	1	1	1	1	2	5	7	2	2	2	0.857143	0	0	0	0	0	0	0	0	0.6	0	0
41271060	G	T	T	T	T	T	T	1	1	0.833333	0.4	0.307692	1	6	11	18	10	13	18	0	0	0	0	0	0	0	0	0	0	0	0
83634845	G	A	A	A	A	A	A	1	0.464286	1	1	1	1	31	28	12	2	15	14	0	0	0	0	0	0	0	0	0.611111	0	0.3125	0
24283854	C	A	T	A	A	A	A	0.777778	1	1	1	0.818182	0.75	9	2	3	8	11	4	0	0	0	0	0	0	0	0	0.210526	0.6	0	0
64515619	C	T	T	T	T	T	T	0.764706	0.416667	1	1	0.666667	0.666667	17	12	16	4	6	3	0	0	0	0	0	0	0	0	0	0	0	0
53685698	G	A	A	A	A	A	A	1	1	1	1	1	0.538462	9	2	3	17	6	13	0	0	0	0	0	0.5	0.533333	0	0	0	0	0
36670203	G	C	C	C	C	C	C	1	1	1	0.5	1	1	3	3	6	6	2	4	0	0	0	0	0	0	0	1	0	0	0	0
117178450	C	T	T	T	T	T	T	0.666667	0.5	0.333333	1	1	1	3	4	9	5	4	9	0	0	0	0	0	0	0	0	0	0	0	0
19281600	C	G	G	G	G	G	G	0.5	1	1	1	1	1	6	3	11	2	2	3	0	0	0	0	1	0	0	0	0	0	0	0
19281650	T	C	C	C	C	C	C	1	1	1	1	1	1	1	5	6	2	2	2	1	0	0	0	0	0	0	0	0	0.5	0	0
44122103	A	G	G	G	G	G	G	1	1	1	1	1	1	7	2	9	11	4	4	0.5	0	0	0	0	1	0	0	0	0	0	0
31375742	T	C	C	C	C	C	C	0.5	1	1	1	1	1	8	5	8	7	4	4	0	0	0	0	0	0	0	0	0	1	0	0
44662793	G	A	A	A	A	A	A	0.714286	0.375	1	0.4	1	1	7	8	9	5	5	3	0	0	0	0	0	0	0	0	0	0	0	0
104348197	C	T	T	T	T	T	T	0.552632	0.65	1	1	1	1	38	20	10	19	102	41	0	0	0	0	0	0	0	0	0	0	0.714286	0
10523067	C	G	G	G	G	G	G	0.384615	1	1	0.666667	1	0.434783	13	8	8	6	14	23	0	0	0	0	0	0	0	0	0	0	0	0
31360426	A	C	C	C	C	C	C	0.666667	0.653846	1	1	0.5	0.8	18	26	17	8	4	20	0	0	0	0	0	0	0	0	0	0.142857	0	0
53509024	T	C	C	C	C	C	C	1	1	1	1	1	0.866667	11	16	9	4	3	15	0	0	0	0	0	1	0.4	0	0	0	0	0
31193215	C	T	T	T	T	T	T	1	1	1	0.75	1	0.714286	3	6	2	4	3	7	0	0	0	0	1	0	0	0	0	0	0	0
64310119	A	G	G	G	G	G	G	0.636364	1	1	1	1	1	11	10	8	6	13	20	0	0	0	0	0	0.333333	0.444444	0.4	0	0	0	0
83122086	A	C	C	C	C	C	C	1	0.857143	1	1	1	1	11	7	29	8	7	13	0	0.666667	0	0	0.307692	0.428571	0	0	0	0	0	0
10072183	A	G	G	G	G	G	G	0.833333	1	1	0.866667	1	0.75	6	10	6	15	13	8	0	0	0	0	0	0	0	0	0	1	0	0
15836662	A	G	G	G	G	G	G	1	1	1	1	0.45	1	4	3	3	2	20	5	0	0	0	0	0	1	0	0	0	0	0	0
65470480	A	C	C	C	C	C	C	1	0.818182	0.666667	1	0.833333	1	3	11	6	11	6	23	0.545455	0	0	0.324324	0	0	0	0	0	0	0	0
102100672	T	C	C	C	C	C	C	0.542857	1	1	1	0.978495	0.5	70	67	40	85	93	154	0	0	0	0	0	0	0	0	0	0	0	0.574074
13416251	C	T	T	T	T	T	T	1	1	1	1	1	0.444444	4	6	2	5	6	9	0	0	0	0	0	1	0	0	0	0	0	0
22433636	T	C	C	C	C	C	C	0.769231	1	1	1	1	1	13	11	4	4	3	18	0	1	0	0	0	0	0	0	0	0	0.333333	0
66623814	T	C	C	A,C	C	C	C	1	1	1	1	1	1	2	6	3	4	9	11	0	0	0	0	0	0	0	0	0	1	0.571429	0
34718216	G	A	A	A	A	A	A	1	1	1	1	1	1	12	3	4	3	6	3	0	1	0	0	0	0	0	0	0.571429	0	0	0
113527967	G	A	A	A	A,C	A	A	0.5	0.75	1	1	0.714286	0.461538	6	4	3	6	7	13	0	0	0	0	0	0	0	0	0	0	0	0
48598475	T	C	C	C	C	C	C	1	1	0.692308	1	0.428571	1	27	42	13	21	28	56	0	0	0	0	0	0	0	0	0.702703	0	0	0
75474058	A	G	G	G	G	G	G	0.375	1	1	1	1	0.714286	24	16	8	3	4	14	0	0	0	0	0	0	0.25	0	0	0	0.444444	0
43846777	G	A	A	A	A	A	A	1	0.666667	0.771429	0.5	1	0.45	21	21	35	4	6	20	0	0	0	0	0	0	0	0	0	0	0	0
31193243	G	T	T	T	T	T	T	1	1	1	0.666667	1	0.571429	3	6	2	3	4	7	0	0	0	0	0.857143	0	0	0	0	0	0	0
25556874	T	C	C	C	C	C	C	0.666667	1	1	1	1	1	6	3	5	5	2	2	0	0	0	0	0.285714	0	0	0	1	0	0	0
5721448	C	T	T	T	T	T	T	1	1	1	1	1	1	12	15	30	5	4	11	0	0	0.25	0.375	0	0	1	0	0	0	0	0
55920920	T	A	A	A	A	A	A	1	1	1	0.666667	1	0.666667	4	2	2	3	4	3	0	0	0	0	0	0	0.3	0	0	0	0	0.666667
94697524	A	G	G	G	G	G	G	1	1	0.428571	1	1	0.333333	2	2	7	10	2	6	0	0	0	0	0.4	0	0	0	0	0	0	0
43973598	G	C	C	C	C	C	C	1	0.684211	0.857143	0.384615	1	0.428571	24	19	14	13	6	14	0	0	0	0	0	0	0	0	0	0	0	0
48586007	T	C	C	C	C	C	C	1	1	0.466667	1	0.25	1	25	37	15	72	28	46	0	0	0	0	0	0	0	0	0.369565	0	0	0
53918164	C	T	T	T	T	T	T	1	0.4	1	1	1	0.375	5	5	8	8	3	8	0	0.428571	0	0	0	0	0	0	0	0	0	0
64515677	C	T	T	T	T	T	T	0.733333	0.545455	1	1	0.666667	0.4	15	11	13	9	3	5	0	0	0	0	0	0	0	0	0	0	0	0
10389698	G	A	A	A	A	A	A	1	1	1	1	1	1	8	8	7	12	15	8	0.4375	0	0	0	0	0	0	0.222222	0	0	0	1
31375795	A	G	G	G	G	G	G	0.333333	1	1	1	1	1	6	8	7	6	6	5	0	0	0	0	0	0	0	0	0	1	0	0
81681304	C	T	T	T	T	T	T	1	1	1	1	1	1	4	12	2	5	5	12	0	0	0	0	0	0	0	0	1	0	0.666667	0
75474065	A	G	G	G	G	G	G	0.413793	1	1	1	1	0.666667	29	16	8	5	4	15	0	0	0	0	0	0	0.25	0	0	0	0.5	0
44978621	T	G	G	G	G	G	G	0.571429	0.454545	1	0.5	1	0.8	7	11	1	2	1	10	0	0	0	0	0	0	0	0	0	0	0	0
81016702	T	C	C	C	C	C	C	0.6125	1	0.68	0.526316	1	1	80	97	25	114	90	122	0	0	0	0	0	0	0	0	0	0	0	0.509434
10271028	C	T	T	T	T	T	T	0.636364	0.6	0.4	1	1	0.666667	11	5	5	4	9	6	0	0	0	0	0	0	0	0	0	0	0	0
24070653	T	C	C	C	C	C	C	0.8	1	1	1	1	1	5	2	3	4	2	2	0	0	0.5	0	0	0	0	0	0	0	1	0
57859356	A	T	T	T	T	T	T	1	1	1	0.636364	0.857143	1	18	18	6	11	14	23	0	0	0	0	0.6	0	0	0.6	0	0	0	0
104351766	C	T	T	T	T	T	T	1	0.666667	1	1	1	1	7	9	6	2	17	12	0	0	0	0	0	0	1	0	0	0	0	0.375
101402925	C	T,A	T	T	T	T	T	1	0.583333	0.428571	1	0.625	0.652174	7	12	14	8	8	23	0	0	0	0	0	0	0	0	0	0	0	0
64315066	C	T	T	T	T	T	T	0.6875	1	1	1	0.941176	1	16	3	10	15	17	14	0	0	0	0	0	0.411765	0.714286	0.214286	0	0	0	0
41287669	A	G	G	G	G	G	G	0.25	1	0.8	1	0.666667	0.571429	8	6	5	5	3	7	0	0	0	0	0	0	0	0	0	0	0	0
26510536	G	A	A	A	A	A	A	0.285714	1	1	1	1	1	7	4	4	2	3	3	0	0	0	0	0	0	0	0	0	0	0	1
22008038	G	C	C	C	C	C	C	1	0.642857	1	1	0.692308	1	50	28	27	24	26	43	0	0	0	0	0	0	0	0.555556	0.5	0	0	0
8196295	C	T	T	T	T	T	T	1	0.666667	1	0.8	1	1	10	12	4	5	4	4	0.315789	0	0	0	0	0	0	0	0	0	0	0.875
53685837	G	A	A	A	A	A	A	1	1	1	1	1	1	8	5	8	7	2	7	0	0	0	0	0	1	0.5	0	0.230769	0	0	0
4947387	A	G	G	G	G	G	G	1	1	1	1	0.789474	1	7	5	2	6	19	21	0.222222	0.8	0	0	0	0	0	0	0	0	0.5	0
80258928	A	T	T	T	T	T	T	1	1	1	1	1	1	6	6	3	8	5	9	0.333333	0	0	0	0	0	0	0.4	1	0	0	0
73948644	C	G	G	G	G	G	G	0.428571	1	1	1	1	0.666667	7	6	5	8	6	6	0	0	0	0	0	0	0	0	0	0	0	0.833333
10271600	T	C	C	C	C	C	C	0.9375	0.5	0.411765	1	1	0.411765	16	20	34	3	13	17	0	0	0	0	0	0	0	0	0	0	0	0
75473369	C	T	T	T	T	T	T	0.318182	1	1	1	1	0.333333	22	14	9	8	11	9	0	0	0	0	0	0	0	0	0	0	0.4	0
22007026	A	G	G	G,T	G	G	G	1	0.454545	1	1	0.642857	1	9	11	2	12	14	9	0	0	0	0	0	0	0	0.25	0.6	0	0	0
57859501	C	T	T	T,A	T	T	T	1	1	1	0.515152	0.9375	1	20	19	9	33	16	29	0	0	0	0	0.75	0	0	0.461538	0	0	0	0
39558238	T	C	C	C	C	C	C	0.5	0.333333	0.6	1	1	0.8	4	6	5	2	3	5	0	0	0	0	0	0	0	0	0	0	0	0
15144446	T	C	C	C	C	C	C	0.636364	1	1	1	1	1	11	3	27	15	19	19	0	0.461538	0	0	0	0	0	0	0	0.344828	0	0.6
117164675	A	T	T	T	T	T	T	0.666667	0.411765	0.333333	1	1	1	9	17	12	2	11	14	0	0	0	0	0.185185	0	0	0	0	0	0	0
10275691	G	A	A	A	A	A	A	0.75	0.888889	0.25	1	1	0.333333	4	9	12	12	10	15	0	0	0	0	0	0	0	0	0	0	0	0
2778461	A	G	G	G	G	G	G	1	1	1	1	1	1	4	5	5	5	6	11	0	0	0	0	0	0.777778	0	0	0	0.5	0.5	0
10271425	A	G	G	G	G	G	G	0.777778	0.6	0.333333	1	1	0.5	9	5	9	10	3	10	0	0	0	0	0	0	0	0	0	0	0	0
42949727	G	A	A	A	A	A	A	1	1	1	1	1	1	12	3	2	5	6	5	0	0.571429	0	0	0	0	0	0	0.647059	0.571429	0	0
20577271	A	G	G	G	G	G	G	1	1	1	1	0.4	0.8	4	4	3	3	5	5	1	0	0	0	0	0	0	0	0	0	0	0
28386778	A	C	C	C	C	C	C	1	1	1	1	1	1	2	2	4	3	12	5	0	1	0.8	0	0	0	0	0	0	0	0	0
110380281	T	C	C	C	C	C	C	0.5	1	1	1	1	1	6	3	7	7	9	15	0	0	0.8	0	0	0	0.5	0	0	0	0	0
92949912	T	C	C	C	C	C	C	1	1	1	1	1	1	7	2	2	2	5	6	1	0	0	0	0	0.8	0	0	0	0	0	0
60501977	A	T	T	T	T	T,G	T	1	1	0.6	1	1	0.6	17	1	5	2	2	5	0	0	0	0	0	1	0	0	0	0	0	0
104343858	T	G	G	G	G	G	G	0.6	1	1	1	1	1	5	10	8	8	8	8	0.4	0	0	0	0	0	1	0	0	0	0	0
28333677	G	T	T	T	T	T	T	0.909091	0.75	0.5	0.8125	0.727273	0.5	11	4	4	16	33	68	0	0	0	0	0	0	0	0	0	0	0	0
33085381	C	T	T	T	T	T	T	0.571429	1	1	0.615385	1	1	7	9	3	13	16	25	0.333333	0	0	0	0	0	0	0	0	0	0.666667	0
48598297	C	T	T	T	T	T	T	1	1	0.44	1	0.375	1	35	36	25	38	48	59	0	0	0	0	0	0	0	0	0.62963	0	0	0
10272322	C	T	T	T	T	T	T	0.75	0.5	0.529412	1	1	0.4	8	6	17	8	29	20	0	0	0	0	0	0	0	0	0	0	0	0
75507635	T	G	G	G	G	G	G	0.727273	1	1	1	1	0.444444	11	5	5	11	7	9	0	1	0	0	0	0	0	0	0	0	0	0
10275416	C	A	A	A	A	A	A	1	0.615385	0.222222	1	1	0.333333	3	13	18	12	14	15	0	0	0	0	0	0	0	0	0	0	0	0
46231668	C	T	T	T	T	T	T	0.333333	0.5	1	1	0.666667	0.666667	6	4	9	5	3	6	0	0	0	0	0	0	0	0	0	0	0	0
4411544	T	A	A	A	A	A	A	1	1	1	1	1	1	8	3	13	3	8	14	0	0	0	0	0	0.333333	0	0	0	0	0.5	1
51617670	T	C	C	C	C	C	C	0.56	0.538462	1	0.434783	1	0.625	25	39	6	69	53	32	0	0	0	0	0	0	0	0	0	0	0	0
9247975	G	C	C	C	C	C	C	0.555556	0.6	1	1	1	1	9	5	22	2	4	3	0	0	0	0	0	1	0	0	0	0	0	0
22822663	G	A	A	A	A	A	A	1	1	0.666667	1	0.75	1	4	6	6	11	4	7	0	0	0	0	0	0	0	0	0.285714	1	0	0
75472511	C	T	T	T	T	T	T	0.75	1	1	1	1	0.375	12	4	4	3	9	8	0	0	0	0	0	1	0	0	0	0	0	0
6711082	C	T	T	T	T	T	T	1	1	0.583333	0.666667	1	1	33	13	12	18	16	30	0	0	0	0	0	0	0.5	0	0.636364	0	0	0
75475009	A	G	G	G	G	G	G	0.653846	1	1	1	1	0.454545	26	19	20	3	17	22	0	0	0	0	0	0	0	0	0	0	1	0
8123117	T	C	C	C	C	C	A	1	1	1	1	1	1	14	9	7	11	8	2	0	0	0	0	0	0.434783	0	0.625	0	0.833333	0	0
37555120	A	G	G	G	G	G	G	1	1	1	1	0.6	1	2	3	4	4	5	5	0.5	0	0	0	0	0	0	0	0	0	1	0
10275759	G	C	C	C	C	C	C	0.833333	0.571429	0.28	1	1	0.388889	6	7	25	9	16	18	0	0	0	0	0	0	0	0	0	0	0	0
25176138	C	G	G	G	G	G	G	1	1	1	1	1	1	6	5	36	8	39	61	0.6	0	0	0	0.333333	0	0	1	0	0	0	0
20524876	T	C	C	C	C	C	C	1	1	1	1	1	1	3	5	5	6	9	3	1	0.181818	0	0	0	0.263158	0	0	0	0.5	0	0
117175873	G	T	T	T	T	T	T	0.565217	0.6	0.555556	1	1	1	23	20	27	13	10	22	0	0	0	0	0	0	0	0.666667	0	0	0	0
22055955	A	G	G	G,T	G	G	G	0.8	1	1	1	1	1	5	3	8	3	5	13	0	0	0	0	0	0	0	0	0.75	0	1	0
1445261	G	A	A	A	A	A	A	1	1	0.75	1	1	1	5	6	4	7	6	15	0	0	0	0	0.8	0	0	0	0.571429	0	0	0.333333
28505690	T	A	A	A	A	A	A	0.697658	0.615514	0.668161	0.622212	0.992891	0.445378	1452	593	223	2197	844	238	0	0	0	0	0	0	0	0	0	0	0	0
89037378	C	T	T	T	T	T	T	1	0.666667	1	1	0.5	0.875	4	3	11	4	24	8	0	0	0	0	0	0	0	0	1	0	0	0
2568630	T	A	A	A	A	A	A	0.494253	1	1	0.522088	0.992218	0.503597	174	138	179	249	257	278	0	0.471545	0	0	0	0	0	0	0	0	0	0
65974175	C	T	T	T	T	T	T	0.5	0.357143	1	0.6875	1	0.866667	12	14	25	16	3	15	0	0.375	0	0	0	0	0	0	0	0	0	0
48693880	C	G	G	G	G	G	G	1	0.166667	1	0.666667	0.6	0.6	8	12	2	12	5	5	0	0	0	0	0	0	0	0	0	0	0	0
10271473	G	C	C	C	C	C	C	0.833333	0.583333	0.3	1	1	0.3	12	12	10	11	6	10	0	0	0	0	0	0	0	0	0	0	0	0
83122033	C	G	G	G	G	G	G	1	1	1	1	1	1	5	7	10	7	6	9	0	0.666667	0	0	0.4	0.75	0	0	0	0.166667	0	0
82550174	G	T	T	T	T	T	T	1	1	0.65	1	1	1	23	31	20	25	28	27	1	0.25641	0	0	0	0	0	0.37931	0	0	0	0
922365	G	A	A	A	A	A	A	0.6	0.666667	0.4	1	1	0.333333	10	9	5	21	3	21	0	0	0	0	0	0	0	0	0	0	0	0
115477174	A	C	C	C	C	C	C	1	1	1	1	0.666667	1	3	4	5	4	3	3	0	0	0.666667	0	0	0	0	0	1	0	0	0
48715669	A	G	G	G	G	G	G	1	0.5	0.5	1	1	1	2	4	4	2	2	2	0	0	0	0	0	0	0	1	0	0	0	0
67375929	G	A	A	A	A	A	A	1	1	1	1	1	1	7	2	3	4	5	4	0	1	0	0	0	0	0	0	0	0	1	0
82087981	A	G	G	G	G	G	G	1	1	1	1	1	1	4	4	4	4	3	6	0	0	0	0	0	0	1	0	1	0	0	0
87944883	A	G	G	G	G	G	G	1	1	1	1	1	1	2	6	5	2	7	13	0	0	0	1	0	0	0	0	1	0	0	0
52573538	T	C	C	C	C	C	C	1	1	1	1	1	1	7	4	4	3	4	4	0	0	0	0	0	0	0	1	0	0	1	0
18901161	A	G	G	G	G	G	G	1	1	1	1	1	1	2	6	3	2	4	6	0	0	0	1	0	1	0	0	0	0	0	0
30694256	T	C	C	C	C	C	C	1	1	1	1	1	1	2	3	2	2	2	4	0	0	0	0	0	0	0	0	0	1	0	1
30694272	T	C	C	C	C	C	C	1	1	1	1	1	1	2	3	3	2	2	4	0	0	0	0	0	0	0	0	0	1	0	1
30694275	A	G	G	G	G	G	G	1	1	1	1	1	1	2	4	4	2	2	4	0	0	0	0	0	0	0	0	0	1	0	1
54108109	A	G	G	G	G	G	G	1	1	1	1	1	1	1	2	5	2	7	9	0	0	0	0	0	0	0	0	1	1	0	0
54358551	C	A	A	A	A	A	A	1	1	1	1	1	1	4	4	7	4	3	3	0	0	0	0	0	0	0	1	0	1	0	0
78975384	G	T	T	T	T	T	T	1	1	1	1	1	1	4	7	4	2	3	3	0	0	0	0	0	0	0	0	1	0	1	0
621887	G	A	A	A	A	A	A	1	1	1	1	1	1	3	3	2	2	5	2	0	0	0	0	0	0	0	0	0	1	0	1
621889	T	C	C	C	C	C	C	1	1	1	1	1	1	3	3	2	2	5	2	0	0	0	0	0	0	0	0	0	1	0	1
58130877	G	A	A	A	A	A	A	1	1	1	1	1	1	5	4	2	5	7	3	1	0	0	0	0	0	0	0	0	0	1	0
5440345	C	T	T	T	T	T	T	1	1	1	1	1	1	12	7	3	3	6	8	0	0	0	1	0	0	0	0	0	0	1	0
5440669	C	T	T	T	T	T	T	1	1	1	1	1	1	9	10	9	4	5	8	0	0	0	1	0	0	0	1	0	0	0	0
5440670	T	C	C	C	C	C	C	1	1	1	1	1	1	9	10	9	4	5	7	0	0	0	1	0	0	0	1	0	0	0	0
11004698	C	G	G	G	G	G	G	1	1	1	1	1	1	4	11	4	2	4	4	0	1	0	0	0	0	0	0	0	0	1	0
44559588	T	C	C	C	C	C	C	1	1	1	1	1	1	8	3	8	5	2	11	1	0	0	0	0	0	0	0	1	0	0	0
18181530	T	A	A	A	A	A	A	1	1	1	1	1	1	2	2	2	4	1	2	0	0	0	0	0	0	1	1	0	0	0	0
18181531	T	G	G	G	G	G	G	1	1	1	1	1	1	2	4	2	4	2	2	0	0	0	0	0	0	1	1	0	0	0	0
18181533	G	C	C	C	C	C	C	1	1	1	1	1	1	2	4	2	4	2	2	0	0	0	0	0	0	1	1	0	0	0	0
18181537	C	T	T	T	T	T	T	1	1	1	1	1	1	2	4	2	4	2	2	0	0	0	0	0	0	1	1	0	0	0	0
18181539	T	C	C	C	C	C	C	1	1	1	1	1	1	2	4	2	4	2	2	0	0	0	0	0	0	1	1	0	0	0	0
48106582	T	C	C	C	C	C	C	1	1	1	1	1	1	2	2	6	2	4	2	0	0	1	0	0	0	0	0	0	0	1	0
105338524	N	C,G	C	C,G,A	C	C	C	1	1	1	1	1	1	24	13	10	10	4	7	0	0	0	0	0	0	1	0	0	0	1	0
119148833	G	A	A	A	A	A	A	1	1	1	1	1	1	2	2	3	4	2	2	0	0	0	0	0	0	0	0	1	0	0	1
15240369	G	T	T	T	T	T	T	1	1	1	1	1	1	4	2	6	3	5	6	0	0	0	0	0	1	0	0	0	0	1	0
85082242	T	C	C	C	C	C	C	1	1	1	1	1	1	3	7	2	5	12	4	1	0	0	0	0	0	0	0	0	0	0	1
9849968	C	T	T	T	T	T	T	1	1	1	1	1	1	2	4	15	3	2	18	1	0	0	0	0	0	0	0	0	1	0	0
51313925	T	C	C	C	C	C	C	1	1	1	1	1	1	3	2	2	3	4	4	1	0	0	0	0	0	0	1	0	0	0	0
98431285	G	A	A	A	A	A	A	1	1	1	1	1	1	6	11	13	1	5	12	0	1	0	0	0	0	0	0	1	0	0	0
101449216	C	T	T	T	T	T	T	1	1	1	1	1	1	2	3	6	3	4	4	1	0	0	0	0	1	0	0	0	0	0	0
7052657	A	G	G	G	G	G	G	1	1	1	1	1	1	6	5	4	2	5	3	0	0	0	0	0	0	1	0	1	0	0	0
71442714	C	T	T	T	T	T	T	1	1	1	1	1	1	7	3	6	3	2	5	0	0	1	0	0	0	0	0	0	1	0	0
144608347	G	T	T	T	T	T	T	1	1	1	1	1	1	3	2	11	1	3	2	0	0	0.5	0	0	0	0	0	0.5	0	1	0
77241891	A	G	G	G	G	G	G	1	0.6	1	1	1	1	2	10	6	4	5	7	0	0	0	0	0.272727	0.333333	0	0	0	0	0	1
114282767	A	G	G	G	G	G	G	1	1	0.636364	0.470588	0.366667	0.510204	39	29	11	34	30	49	0	0	0	0	0	0	0	0	0	0	0	0
82501972	G	C	C	C	C	C	C	1	0.571429	1	1	1	1	6	7	8	12	2	10	0	0.6	0.647059	0.357143	0	0	0	0	0	0	0	0
20982421	C	G	G	G	G	G	G	1	0.3	1	1	1	0.666667	3	10	2	3	9	3	0	0	0	0	0	0	0	0	1	0	0	0
114283668	T	C	C	C	C	C	C	1	1	0.458333	0.466667	0.42029	0.617021	80	92	24	90	69	94	0	0	0	0	0	0	0	0	0	0	0	0
117182830	T	A	A	A	A	A	A	0.2	0.26087	0.5	1	1	1	15	23	12	15	22	14	0	0	0	0	0	0	0	0	0	0	0	0
1579548	T	A	A	A	A	A	A	0.357143	0.6	1	1	1	1	14	5	7	3	4	5	0	0	0	0	1	0	0	0	0	0	0	0
20697245	C	T	T	T	T	T	T	0.8	0.904762	1	0.636364	0.714286	1	10	21	4	11	14	40	0	0	0	0	0	0	0	0	0.5	0.6	0	0
82550173	G	C	C	C	C	C	C	1	1	0.636364	1	1	1	25	33	22	30	31	30	0.972973	0.25641	0	0	0	0	0	0.451613	0	0	0	0
10275545	A	G	G	G	G	G	G	0.714286	0.285714	0.454545	1	1	0.5	7	7	11	13	10	10	0	0	0	0	0	0	0	0	0	0	0	0
127762440	T	C	C	C	C	C	C	1	1	0.75	0.6	1	1	4	7	4	5	5	9	0	0.4	0	0	0.5	0	0	0	0	0	0.5	0
31541040	C	G	G	G	G	G	G	0.25	1	0.285714	1	1	0.8	16	11	7	6	2	5	0	0	0	0	0	0.4	0	0	0	0	0	0
66609042	T	C	C	C	C	C	C	1	1	1	0.333333	1	0.833333	16	15	4	9	14	6	0	0.6	0	0	0	0	0	0	0.181818	0.454545	0	0
75507631	T	G	G	G	G	G	G	0.727273	0.833333	1	0.923077	1	0.444444	11	6	5	13	7	9	0	1	0	0	0	0	0	0	0	0	0	0
14529395	T	G	G	G	G	G	G	1	0.888889	1	1	0.333333	0.705882	6	9	6	9	12	17	0	0	0	0	0	1	0	0	0	0	0	0
28810727	C	T,A	T	T	T	T	T	1	0.1875	1	0.428571	0.307692	1	9	16	7	7	13	16	0	0	0	0	0	0	0	0	0	0	0	0
20008892	T	C	C	C	C	C	C	1	0.666667	1	1	0.75	1	7	3	2	2	4	13	1	0	0	0	0	0	0	0.5	0	0	0	0
57583044	G	A	A	A	A	A	A	0.333333	1	1	1	0.5	1	6	3	4	2	4	9	0	0.916667	0	0	0	0	0	0	0	0	0	0
28354782	T	C	C	C	C	C	C	0.40625	1	1	0.545455	1	1	32	2	3	33	39	43	0	0.5	0	0	0.538462	0	0	0	0	0	0	0
51854995	C	T	T	T	T	T	T	0.486559	0.463918	0.979167	0.464286	1	0.515544	372	388	192	448	249	386	0	0	0	0	0	0	0	0	0	0	0	0
64513736	G	A	A	A	A	A	A	0.411765	0.833333	1	1	0.45	0.625	17	12	9	7	20	32	0	0	0	0	0.411765	0	0	0	0	0	0	0
100498341	A	G	G	G	G	G	G	0.407407	0.9375	1	0.5	0.777778	1	27	16	31	12	9	19	0	0	0.5625	0.153846	0	0	0	0	0	0	0	0
27006480	G	A	A	A	A	A	A	0.416667	0.555556	0.4	0.533333	1	1	12	9	5	15	4	13	0	0	0	0	0	0	0	0	0	0	0	0
75495802	A	C	C	C	C	C	C	0.5	1	1	1	1	0.4	4	10	6	6	2	5	0	0	0	1	0	0	0	0	0	0	0	0
15082638	G	A	A	A	A	A	A	0.4	0.875	1	1	0.625	1	5	8	3	2	8	12	1	0	0	0	0	0	0	0	0	0	0	0
83124211	C	T	T	T	T	T	T	1	1	1	1	1	1	5	2	2	2	3	4	0	0.5	0	1	0	0	0	0	0	0	0.6	0
14617023	T	C	C	C	C	C	C	1	0.724138	0.555556	0.428571	0.6	1	12	29	9	21	15	21	0	0	0	0	0	0	0	0	0	0	0	0.411765
42620968	G	A	A	A	A	A	A	1	1	1	1	1	0.666667	3	2	3	3	3	6	1	0	0	0	0	0.333333	0	0	0	0	0.444444	0
59701892	C	T,A	T	T	T	T	T	1	1	1	1	1	0.888889	5	4	2	2	6	9	0	0	0	0	0	0	0	1	0	0	1	0
8564813	A	G	G	G	G	G	G	1	1	1	1	1	1	3	6	32	5	6	17	0	0	0	0	0	0	0.777778	0	0.333333	0	1	0
10928055	T	C	C	C	C	C	C	1	1	1	1	0.5	1	19	8	6	4	8	13	0	0	0.583333	0.6	0	0	0	0	0	0.428571	0	0
61227079	T	C	C	C	C	C	C	1	1	1	0.285714	1	1	8	6	5	7	3	15	1	0	0	0	0	0	0	0	0	0	0	0.4
103183909	A	T	T	T	T	T	T	0.666667	1	1	1	1	0.833333	3	3	3	6	4	6	0.571429	0.4	0	0	0	0	0	0	0.642857	0	0	0
117175889	G	A	A	A	A	A	A	0.583333	0.619048	0.68	1	1	1	24	21	25	9	8	21	0	0	0	0	0	0	0	1	0	0	0	0
7602727	T	C	C	C	C	C	C	0.65	0.47619	1	0.416667	0.6	0.736842	20	21	11	24	15	19	0	0	0	0	0	0	0	0	0	0	0	0
81016668	A	G	G	G	G	G	G	0.618421	1	1	1	1	1	76	92	26	108	105	124	0	0	0	0	1	0.166667	0	0	0	0	0	0.57377
64513010	T	C	C	C,A	C	C	C	0.44	0.923077	1	1	0.410714	0.507937	50	26	11	31	56	63	0	0	0	0	0.404255	0	0	0	0	0	0	0
82395911	C	T	T	T	T	T	T	1	1	1	1	1	1	17	12	11	2	2	15	0.6	0	0	0	0	0	0	0	1	0	0	0.52381
49734759	A	C	C	C	C	C	C	1	1	0.875	1	1	1	5	6	8	6	8	11	0	1	0	1	0	0	0	0	0	0	0	0
51765099	C	T	T	T	T	T	T	0.451613	0.526316	1	0.428571	1	0.466667	31	19	2	21	21	30	0	0	0	0	0	0	0	0	0	0	0	0
6425342	C	T	T	T	T	T	T	0.666667	1	1	0.5	1	1	6	10	7	8	8	8	0	0.32	0	0	0	0.6	0	0.375	0	0	0	0
4438326	T	C	C	C	C	C	C	1	1	1	1	1	1	4	20	7	6	6	4	0.846154	0.285714	0	0	0	0	0	1	0	0	0	0
53398494	C	T	T	T	T	T	T	1	1	1	0.5	1	0.363636	3	4	2	4	2	11	0	0	0	0	0	1	0	0	0	0	0	0
111189898	A	G	G	G	G	G	G	1	1	1	1	0.857143	1	9	15	11	11	7	15	1	0	0	0	0	0	0	0	0	1	0	0
28333678	G	C	C	C	C	C	C	0.9	0.75	0.666667	0.75	0.689655	0.472727	10	4	3	12	29	55	0.374302	0	0	0	0	0	0	0	0	0	0	0
75465990	A	T	T	T	T	T	T	0.5	1	1	1	1	0.153846	4	2	4	2	4	13	0	0	0.8	0	0	0	0	0	0	0	0	0
10390545	T	G	G	G	G	G	G	0.583333	1	1	1	1	0.6	36	25	6	33	12	25	0	0	0	0	0.333333	0	0	0	0	0	0	1
91073024	T	C	C	C	C	C	C	0.583333	1	1	0.428571	1	0.305556	12	7	7	7	7	36	0	0	0	0	0	0	0	0	0	0	0.470588	0
75474965	T	C	C	C	C	C	C	0.777778	1	1	1	1	0.3	27	29	29	3	16	20	0	0	0	0	0	0.235294	0	0	0	0	1	0
49725664	G	A	A	A	A	A	A	0.714286	0.5	0.4	1	0.625	0.6	7	6	5	3	8	5	0	0	0	0	0	0	0	0	0	0	0	0
75474917	T	C	C	C	C	C	C	0.621622	1	1	1	1	0.371429	37	29	28	9	25	35	0	0	0	0	0.222222	0.153846	0	0	0	0	0.777778	0
25539560	A	T	T	T	T	T	T	0.5	1	1	1	1	0.666667	20	3	6	2	2	6	1	0	0	0	0	0.333333	0	0	0	0	0	0
45137512	T	C	C	C	C	C	C	1	0.333333	1	0.5	1	1	7	6	7	4	2	2	0	1	0	0	0	0	0	0	0	0	0	0
77229708	T	C	C	C	C	C	C	1	0.333333	1	1	1	1	9	6	9	4	6	3	0	0	0	0	0	0	0	0	0.5	0	1	0
74740679	C	T	T	T	T	T	T	1	0.833333	1	1	1	1	8	12	10	8	2	4	0	1	0	0	0	0	1	0	0	0	0	0
10391419	C	T	T	T	T	T	T	1	1	1	1	1	1	5	6	5	12	8	6	0	0	0	0	0.5	0	0.666667	0	0	0	0	1
22055979	A	G	G	G,T	G	G	G	0.666667	1	1	1	1	1	6	3	10	3	4	11	0	0	0	0	0	0	0	0	0.846154	0	1	0
24663386	C	T	T	T	T	T	T	1	1	1	1	1	0.818182	4	6	2	2	3	11	0	0	0	0	0	0	0	0	1	1	0	0
51058388	A	T	T	T	T	T	T	0.5	0.363636	1	0.571429	1	0.382979	6	11	19	14	49	47	0	0	0	0	0	0	0	0	0	0	0	0
31617813	G	A	A	A	A	A	A	0.577778	1	0.642857	1	1	1	45	36	42	31	39	39	0.428571	0	0	0	0	0.975	0	0	0	0	0	0
6724516	C	T	T	T	T	T	T	0.578947	0.916667	1	0.428571	1	0.47619	19	12	10	14	9	21	0	0	0	0	0	0	0.25	0	0	0	0	0.333333
15156473	G	C	C	C	C	C	C	1	1	1	1	1	1	3	2	2	7	9	15	0	0.666667	0	0	0	0	0	0	0	0.52	0	1
846721	C	T	T	T	T	T	T	0.516667	0.377358	0.464286	1	1	0.454545	60	53	56	41	63	66	0	0	0	0	0	0	0	0	0	0	0	0
3623010	C	T	T	T,G	T	T	T	0.5	0.666667	1	0.625	1	0.565217	10	18	9	8	13	23	0	0	0	0	0	0	0.545455	0	0	0	0	0
75474763	T	C	C	C	C	C	C	0.339623	1	1	1	1	0.285714	53	38	10	12	15	35	0	0	0	0	0	0.285714	0	0	0	0	0.538462	0
84376897	A	G	G	G	G	G	G	1	1	1	1	1	0.8	3	2	2	2	7	5	0	0	0	0	0	0	0	1	0	0	1	0
16943300	C	A	A	A	A	A	A	1	1	1	1	1	0.8	2	9	16	6	6	15	0	0	0	1	0	0	0	0	0	0.5	0.5	0
8196631	G	A	A	A	A	A	A	1	0.4	1	0.25	1	1	17	5	8	8	7	14	0	0.857143	0	0	0	0	0	0	0	0	0	0
87279976	G	A	A	A	A	A	A	1	0.5	1	1	0.419355	0.578947	9	20	13	21	31	38	0	0	0	0	0	0	0	0.705882	0	0	0	0
42621049	C	T	T	T	T	T	T	1	1	1	1	1	0.6875	7	5	7	8	10	16	1	0	0	0	0	0.333333	0	0	0	0	0.5625	0
86566246	G	A	A	A	A	A	A	1	0.444444	1	1	0.611111	1	26	18	27	22	18	50	0	0	0.666667	0.607143	0	0	0	0	0	0	0	0
14872403	G	A	A	A	A	A	A	0.777778	1	1	1	1	1	9	5	14	7	12	6	0	1	0	0	0	0	0	0	0	0	0	1
33962514	G	T	T	T	T	T	T	1	1	1	1	1	0.777778	4	3	8	4	2	9	0	0	0	0	0	0	0	0	1	1	0	0
117182843	A	G	G	G	G	G	G	0.230769	0.142857	0.4	1	1	1	13	21	10	14	21	14	0	0	0	0	0	0	0	0	0	0	0	0
51245299	C	T	T	T	T	T	T	1	1	1	1	1	1	23	21	23	27	33	43	0	0.611111	0	0	0	0.706897	0	0	0	0	0.5	0.409091
10928250	C	T	T	T	T	T	T	1	1	1	1	0.857143	1	6	3	9	2	7	9	0	1	0	0.285714	0	0	0	0	0	0	0	0.8
68012626	T	C	C	C	C	C	C	1	0.833333	0.6	1	1	1	4	6	5	3	3	2	0.666667	0	0	0	0	0	0	0	0	0	0	1
87845750	A	T	T	T	T	T	T	1	0.428571	1	1	1	0.333333	2	7	4	2	8	6	0	1	0	0	0	0	0	0	0	0	0	0
83264839	C	T	T	T	T	T	T	1	1	1	1	1	0.571429	4	7	4	7	12	21	0.4	0	0	0	0	0	0	0	0.6875	0.3	0.428571	0
73929542	G	A	A	A	A	A	A	0.7	1	1	1	1	0.625	10	7	7	10	7	8	0.571429	0	0	0	0	0	0	0	0	1	0	0
33480968	G	A	A	A	A	A	A	0.444444	1	0.533333	1	0.772727	1	27	16	15	7	22	18	1	0	0	0	0	0	0	0	0	0	0	0
105271237	A	G	G	G	G	G	G	1	1	1	1	1	0.666667	2	2	2	4	5	3	0	0	0	0.916667	0	0	0	0	0	0	0	1
68107700	G	A	A	A	A	A	A	1	1	1	1	1	0.75	5	5	10	5	2	4	0	0	0	1	0	0	1	0	0	0	0	0
71419350	C	T	T	T	T	T	T	1	1	1	1	1	1	5	2	4	4	8	6	0.653846	0	0.5	0.7	0	0	0	0	0	0.4	0	0
86833396	G	A	A	A	A	A	A	1	1	1	0.571429	0.6	1	2	6	2	7	5	5	0	0	0	0	0	0	0	0	1	0	0	0.428571
72099235	A	G	G	G	G	G	G	0.666667	1	1	1	1	1	3	7	9	15	8	5	0	0	0.428571	0.5	0	0	0	1	0	0	0	0
34543350	G	C	C	C	C	C	C	0.363636	0.727273	1	1	1	0.266667	11	11	7	9	12	15	0	0	0	0	0	0.625	0	0	0	0	0	0
14299814	G	A	A	A	A	A	A	1	1	1	1	0.928571	0.8	2	7	4	6	14	5	0	0	0	0	0	0	0	0	0	1	1	0
44763277	G	A	A	A	A	A	A	1	0.75	1	1	1	0.75	2	4	2	2	2	4	0	0	0	0	0	0.272727	0	0	1	0	0	0.5
51346562	G	A	A	A	A	A	A	1	1	1	1	1	1	7	14	2	2	4	6	0	0	0.4	0.875	0	0	0	0	0	0.4	0.6	0
34806657	A	T	T	T	T	T	T	0.5	0.545455	0.769231	0.666667	0.826087	0.416667	8	22	26	21	23	24	0	0	0	0	0	0	0	0	0	0	0	0
42616796	G	A	A	A	A	A	A	1	1	1	1	1	0.222222	8	2	20	6	6	9	0	0.653846	0	0	0	0.666667	0	0	0	0.181818	0	0
64511017	C	T	T	T	T	T	T	0.777778	0.8	1	1	0.466667	0.4	18	5	17	10	15	15	0	0	0	0	0.727273	0	0	0	0	0	0	0
10275436	C	T	T	T	T	T	T	0.75	0.5	0.153846	1	1	0.3125	4	8	13	12	15	16	0	0	0	0	0	0	0	0	0	0	0	0
1762168	C	T	T	T	T	T	T	1	0.588235	1	0.454545	0.642857	1	16	17	2	22	14	12	0.636364	0	0	0.333333	0	0	0	0	0	0	0	0
103183903	C	T	T	T	T	T	T	0.666667	1	1	1	1	0.714286	3	3	3	5	4	7	0.571429	0.454545	0	0	0	0	0	0	0.642857	0	0	0
65952912	A	T	T	T	T	T	T	1	0.875	1	1	0.5	1	2	8	2	3	4	2	0	0	0	0	0	0	0	0.666667	0	0	1	0
88263639	G	A	A	A	A	A	A	0.552632	0.476923	0.614458	0.506849	1	0.552941	76	65	83	73	42	85	0	0	0	0	0	0	0	0	0	0	0	0
42902904	G	A	A	A	A	A	A	1	1	1	1	1	1	13	40	7	50	31	24	0	0.44898	0.541667	0.444444	0	0	0	0	0.465753	0.396226	0	0
40820474	G	A	A	A	A	A	A	0.5	1	0.428571	1	1	1	4	4	14	8	13	9	0	0.230769	0	0	0	0	0	0	0	1	0	0
10275683	T	C	C	C	G	C	C	0.75	0.888889	0.25	0.5	1	0.307692	4	9	12	4	8	13	0	0	0	0	0	0	0	0	0	0	0	0
64512505	A	G	G	G	G	G	G	0.666667	0.75	1	1	0.25	0.8125	6	4	6	13	16	16	0	0	0	0	0.566667	0	0	0	0.222222	0	0	0
24925244	G	T	T	T	T	T	T	1	0.357143	0.75	1	0.576923	1	10	14	12	9	26	14	1	0	0	0	0	0	0	0	0	0	0	0
51728626	G	A	A	A	A	A	A	0.692308	0.52381	1	0.483871	1	0.807692	26	21	8	31	23	26	0	0	0	0	0.444444	0	0	0	0	0.38	0	0
10091566	G	A	A	A	A	A	A	0.56044	1	1	0.514706	1	0.513761	91	111	74	136	128	109	0	0	0	0	0	0	0	0	0	0.491228	0.414634	0
81103251	T	C	C	C	C	C	C	0.285714	0.666667	1	0.666667	0.555556	1	7	3	2	3	9	3	0	0	0	0	0	0	0	0	0.5	0	0	0
8196265	C	T	T	T	T	T	T	0.5	0.636364	1	0.75	1	1	10	11	2	4	6	5	0.380952	0	0	0	0	0	0	0	0	0	0	0.833333
110391594	A	G	G	G	G	G	G	0.8	1	1	1	1	1	5	13	2	7	13	16	0.631579	0	0.5	1	0	0	0	0	0	0	0	0
55180180	C	T	T	T	T	T	T	1	1	1	1	0.666667	0.666667	3	10	11	2	3	12	0	1	0	0	0.666667	0	0	0	0	0	0	0
84476588	T	C	C	C	C	C	C	1	1	1	1	1	0.666667	3	2	5	2	3	12	0	1	0	0	1	0	0	0	0	0	0	0
49852012	G	A	A	A	A	A	A	1	1	1	1	0.666667	1	3	5	2	2	3	2	0	1	0	0	0	0	0	0	0	1	0	0
47818047	G	A	A	A	A	A	A	1	1	1	1	1	1	3	4	2	2	3	2	0	0	1	0.333333	0	0	0	0	0	1	0	0
44978328	G	C	C	C	C	C	C	1	1	1	1	1	1	2	8	3	4	4	11	0	0	0.666667	0	0	0	1	0	0	0.666667	0	0
36459993	G	A	A	A	A	A	A	0.625	0.636364	1	0.548387	0.48	0.375	16	11	8	31	25	16	0	0	0	0	0	0	0	0	0	0	0	0
100483117	T	C	C	C	C	C	C	0.75	0.75	1	0.705882	0.3	1	8	12	4	17	20	12	0	0	0.6	0.25	0	0	0	0	0	0	0	0
44050098	G	T	T	T	T	T	T	0.428571	1	1	1	1	0.222222	7	4	12	11	2	9	0	0	0	0	0	1	0	0	0	0	0	0
42621094	T	A	A	A	A	A	A	1	1	1	1	1	0.733333	10	10	7	3	13	15	1	0	0	0	0	0.416667	0	0	0	0	0.666667	0
93084994	G	A	A	A	A	A	A	0.3125	0.363636	1	1	1	1	32	22	36	6	2	7	0	0	0	0	0	0	0.571429	0	0	0	0.461538	0
22263280	T	C	C	C	C	C	C	0.777778	0.363636	1	0.5	0.461538	0.818182	9	11	13	12	13	11	0.285714	0	0	0	0	0	0	0	0	0	0	0
34806710	A	C	C	C	C	C	C	0.3	0.681818	0.6	0.764706	0.826087	0.454545	10	22	30	17	23	33	0	0	0	0	0	0	0	0	0	0	0	0
53257557	C	A	A,G	G	G,A	A	G	0.6875	1	0.272727	1	1	0.333333	16	9	11	5	4	6	0.666667	0	0	0	0	0	0	0	0	0	0	0
11396696	A	G	G	G	G	G	G	1	0.5	1	1	1	1	4	4	2	9	14	4	0	0	0	0	0	0	0.375	0	0.5	1	0	0
91073533	A	G	G,T	G	G	G	G	0.478261	1	1	0.818182	1	0.455696	23	8	65	11	15	79	0	0.372549	0	0	0	0	0	0	0	0	0.761905	0
117182681	T	C	C	C,A	C	C	C	0.5	0.615385	1	1	1	1	14	13	7	4	13	20	0	0	0.5	0	0	1	0	0	0	0	0	0
10800826	G	A	A	A	A	A	A	1	0.411765	0.5	0.5	0.615385	1	16	17	4	46	26	24	0	0	0	0	0	0.416667	0	0	0	0	0	0
75468221	A	C	C	C	C	C	C	0.48	1	0.65	0.571429	0.517241	0.390244	75	67	20	14	29	41	0	0	0	0	0	0	0	0	0	0	0	0
48621426	G	C	C	C	C	C	C,A	1	1	0.666667	0.909091	1	1	13	19	9	11	9	17	0.302326	0	0	0	0	0.833333	0	0	0	0	0.538462	0.3
56169752	G	C	C	C	C	C	C	1	0.483871	0.545455	1	0.666667	1	38	31	11	18	6	31	0.666667	0	0	0	0	0	0	0	0	0	0.428571	0
55185432	G	A	A	A	A	A	A	1	1	1	1	1	1	7	2	4	4	3	2	0	0	0	0.4	0	0	0	0	0	1	1	0
58409024	A	G	G	G	G	G	G	1	1	1	1	1	1	2	3	4	2	4	3	0	0	0.4	0	0	1	0	0	0	0	0	1
55188075	G	A	A	A	A	A	A	1	1	1	0.6	1	1	6	6	4	5	8	4	0.6	1	0	0	0	0	0	0	0.4	0	0	0
34999860	G	A	A	A	A	A	A	1	1	1	0.6	1	1	2	3	4	5	1	3	0	1	0	0	0	1	0	0	0	0	0	0
31375664	G	A	A	A	A	A	A	0.6	1	1	1	1	1	5	3	10	3	9	2	0	0	0	0	0	0	0	0	1	1	0	0
35287918	C	G	G	G	G	G	G	0.6	1	1	1	1	1	5	4	3	2	3	5	0	0	0	1	0	0	0	0	0	0	1	0
1468350	G	A	A	A	A	A	A	0.5625	0.48	0.625	0.630435	0.481481	1	32	25	16	46	54	78	0	0	0	0	0	0	0	0.181818	0	0	0	0
2779846	T	C	C	C	C	C	C	1	1	1	1	1	1	10	6	4	16	14	23	0	0	0	0	0	0.25	0	0	0	0.542857	1	0.612903
10091879	A	G	G	G	G	G	G	0.551724	0.992063	1	0.485149	1	0.528986	87	126	72	101	171	138	0	0	0	0	0	0	0	0	0	0.619718	0.347826	0
71724694	T	C	C	C	C	C	C	0.75	0.833333	1	1	1	1	4	6	4	1	2	3	0	0	0	0	0	0	0	0	1	0	0	1
1046830	C	T	T	T	T	T	T	1	1	1	1	1	1	5	2	13	2	4	7	0	0	0	0	0	0	1	0	0.666667	0.75	0	0
7842378	A	G	G	G	G	G	G	0.705882	0.625	0.642857	0.666667	0.5	0.4375	17	8	14	9	4	16	0	0	0	0	0	0	0	0	0	0	0	0
84254106	T	C	C	C	C	C	C	1	0.580645	1	1	0.371429	0.346154	22	31	5	37	35	26	0	0.431818	0	0	0.289474	0	0	0	0	0	0	0
64512498	G	C	C	C	C	C	C	0.666667	0.6	1	1	0.25	0.866667	6	5	6	18	16	15	0	0	0	0	0.586207	0	0	0	0.222222	0	0	0
88263859	T	G	G	G	G	G	G	0.539326	0.55914	0.511111	0.433962	1	0.53125	89	93	90	53	58	96	0	0	0	0	0	0	0	0	0	0	0	0
15208321	A	C	C	C	C	C	C	1	1	1	1	1	1	10	10	15	8	3	17	0	0	0	0	0	0	0	0	0.6	1	0.833333	0
27374838	C	G	G	G	G	G	G	0.8	0.75	1	0.416667	1	0.777778	5	8	6	12	16	9	0	0	0.454545	0.727273	0	0	0	0	0	0	0	0
27865073	G	A	A	A	A	A	A	0.957746	0.929368	0.92	0.927497	0.933702	0.478078	355	269	75	731	724	1186	0.330769	0	0	0	0.505882	0	0	0	0	0.754128	0	0
88732330	T	G	G	G	G	G	G	1	0.75	0.5	1	0.6	1	3	4	4	5	5	6	0	0	0	0	0	0	0	0	0	0.5	0.8	0
10927331	T	C	C	C	C	C	C	1	1	1	1	0.75	1	2	2	4	3	4	4	0	0	0.5	0.7	0	1	0	0	0	0	0	0
73508742	T	C	C	C	C	C	C	0.666667	0.454545	0.538462	0.642857	0.625	0.619048	21	22	13	14	16	21	0	0	0	0	0	0	0	0	0	0	0	0
922727	G	A	A	A	A	A	A	0.357143	0.733333	0.875	1	1	0.272727	14	15	8	20	14	11	0	0	0	0	0	0	0.692308	0	0	0	0	0
57145921	T	G	G	G	G	G	G	0.533333	0.666667	0.764706	0.458333	0.545455	0.571429	15	18	17	24	11	28	0	0	0	0	0	0	0	0	0	0	0	0
28179211	G	A	A	A	A	A	A	0.285714	1	0.75	1	1	0.5	7	4	8	2	6	4	0	1	0	0	0	0	0	0	0	0	0	0
8052277	G	A	A	A	A	A	A	0.459677	0.585714	1	0.575342	1	1	124	70	61	73	81	144	0.565217	0	0	0	0	0	0	0	0	0	0.530864	0
18181519	T	C	C	C	C	C	C	1	1	1	0.5	1	1	2	4	2	4	2	2	0	0	0	0	0	0	1	1	0	0	0	0
103827562	T	C	C	C	C	C	C	1	0.5	1	1	1	1	2	4	6	4	3	2	0	0	0	0	0	0	0	0	0	1	1	0
104351603	C	T	T	T	T	T	T	0.7	0.8	1	1	1	1	10	10	5	2	13	11	0.5	0	0	0	0	0	0	0	0.5	0	0	1
35047135	A	G	G	G	G	G	G	0.5	1	1	1	1	1	4	3	2	2	5	2	0	0	0	0	0	0	0	0	1	1	0	0
44122291	T	C	C	C	C	C	C	1	1	1	1	1	1	2	2	4	4	2	6	0.5	0	0	0	0	1	0	1	0	0	0	0
15366864	A	G	G	G	G	G	G	1	1	1	1	1	1	10	3	8	4	8	4	0	0	0	0	0	1	0	0	0	1	0	0.5
55961605	A	G	G	G	G	G	G	1	1	1	1	1	1	8	2	2	2	2	3	0	0	1	1	0	0.5	0	0	0	0	0	0
10091006	T	G	G	G	G	G	G	0.559322	1	1	0.416667	1	0.453782	59	58	28	72	70	119	0	0	0	0	0	0	0	0	0	0.484848	0.45	0
53843050	C	A	A	A	A	A	A	1	1	1	0.642857	1	1	4	5	5	14	4	10	0	0	0	0	0.4	0	0	0.75	0	0	0	1
14728643	T	G	G	G	G	G	G	1	0.541667	0.382353	0.586957	0.464286	0.510638	29	48	34	46	28	47	0	0	0	0	0	0	0	0	0	0	0	0
127762926	G	A	A	A	A	A	A	1	1	0.692308	0.5	1	1	11	22	13	8	36	26	0	0	0	0.5	0.875	0	0	0	0	0.333333	0	0
117184135	C	T	T	T	T	T	T	0.571429	0.8	0.4	1	1	1	7	10	5	4	13	13	0	0	0.5	0.8	0	0	0	0	0	0	0	0
6786102	C	A	A	A	A	A	A	0.666667	1	0.8	0.363636	1	0.307692	9	8	5	11	10	13	0	0	0	0	0	0	0	0	0	0.666667	0	0
952348	G	A	A	A	A	A	A	0.8	1	1	1	1	0.666667	10	3	2	3	7	3	1	0	0	0	0	0	0	0	0	1	0	0
60064317	T	C	C	C	C	C	C	0.666667	1	0.533333	1	0.8	0.461538	6	5	15	13	5	13	0	0	0	1	0	0	0	0	0	0	0	0
85851128	A	G	G	G	G	G	G	1	1	0.666667	0.6	1	0.857143	3	2	3	5	3	7	0	0	0	0	0	0	0	0	1	0.666667	0	0
14592845	T	A	A	A	A	A	A	1	0.593407	0.7	0.489796	0.578313	1	90	91	60	98	83	104	0	0	0	0	0	0.363636	0	0	0	0	0	0.545455
71299812	A	C	C	C	C	C	C	1	0.978723	0.566038	0.555556	0.5	0.441558	52	47	53	36	38	77	0	0	0	0	0	0	0	0.592593	0	0	0	0
74029101	G	A	A	A	A	A	A	1	1	1	0.25	0.444444	1	13	4	2	8	9	12	0	0.583333	0	0	0	0	0.666667	0	0	0	0	0
121206157	C	G	G	G	G	G	G	0.3	1	0.8	0.833333	0.555556	0.470588	10	8	10	6	9	17	0	0.515152	0	0	0	0	0	0	0	0	0	0
75474094	T	C	C	C	C	C	C	0.531915	0.933333	1	1	1	0.619048	47	30	11	10	10	21	0	1	0	0	0	0	0.444444	0	0	0	0.2	0
84950318	C	T	T	T	T	T	T	1	0.857143	0.846154	0.4	0.666667	0.666667	6	7	13	5	3	6	0	0	0	0	0	0	0	0	1	0	0	0
15366815	G	A	A	A	A	A	A	0.666667	1	1	1	1	1	6	6	11	3	8	5	0	0	0	0	0	0.833333	0	0	0	1	0	0.4
68012621	T	C	C	C	C	C	C	1	0.833333	0.6	1	1	1	4	6	5	3	2	2	1	0	0	0	0	0	0	0	0	0	0	1
117171438	A	C	C	C	C	C	C	0.357143	0.588235	0.333333	1	1	0.956522	28	17	33	8	12	23	0	0	0.272727	0.533333	0	0	0	0	0	0	0	0
110483953	A	G	G	G	G	G	G	0.25	0.857143	1	1	0.75	0.571429	12	7	3	2	4	14	0	0	0	1	0	0	0	0	0	0	0	0
27865124	G	A	A	A	A	A	A	0.936747	0.901887	0.863014	0.910906	0.928571	0.5373	332	265	73	651	672	1126	0.309783	0	0	0	0.599585	0	0	0	0	0.743879	0	0
49145267	C	T	T	T	T	T	T	1	0.485714	1	0.551282	0.588785	0.555556	51	70	16	156	107	81	0	0	0	0	0	0	0	0	0	0	0.166667	0.594595
62978172	G	T	T	T	T	T	T	0.283105	0.394904	0.363636	1	0.984615	0.391111	219	157	55	70	65	225	0	0	0	0	0	0	0	0	0	0	0	0
33300101	C	T	T	T	T	T	T	0.525	0.72	1	0.333333	0.375	0.461538	40	25	22	9	8	26	0	0	0	0	0	0	0	0	0	0	0	0
77239370	C	T	T	T	T	T	T	1	0.230769	1	1	1	1	9	13	12	6	10	3	0	0	0	0	0.4	0.428571	0	0	0	0	0	1
62955116	T	C	C	C	C	C	C	1	1	1	0.4	1	1	2	10	6	5	5	3	0	0	0	1	0	0	0	0	0	0	0	1
105655877	C	T	T	T	T	T	T	0.507042	0.379433	0.505814	0.446367	1	0.555891	284	282	172	289	206	331	0	0	0	0	0	0	0	0	0	0	0	0
84336331	G	A	A	A	A	A	A	1	0.708333	1	1	0.25	0.367347	47	24	41	21	20	49	0	0.558824	0	0	0.375	0	0	0	0	0	0	0
51572755	C	T	T	T	T	T	T	0.461538	0.5	1	0.466667	1	0.588235	13	18	11	15	17	17	0	0	0	0	0	0	0	0	0	0.625	0	0
103276827	C	T	T	T	T	T	T	0.472222	0.675676	0.666667	0.553191	0.407407	0.615385	36	37	12	47	27	39	0	0	0	0	0	0	0	0	0	0	0	0
33968767	A	T	T	T	T	T	T	0.666667	1	1	1	1	0.409091	6	17	12	8	9	22	0.971429	0	0	0	0	0.714286	0	0	0	0	0	0
101404580	G	A	A	A	A	A	A	1	0.358974	0.25	1	0.363636	0.416667	39	39	16	55	55	48	0	0	0	0	0	0	0	0	0	0	0	0
117195635	T	C	C	C	C,A	C	C	0.6	0.538462	1	1	1	1	5	13	6	4	9	10	0	0	0.8	0.285714	0	0.666667	0	0	0	0	0	0
6860975	A	G	G	G	G	G	G	0.55	1	0.555556	1	1	0.461538	20	18	18	6	4	13	1	0	0	0	0	0	0	0	0	0.181818	0	0
28472662	G	T	T	T	T	T	T	1	0.8	1	0.882353	1	0.368421	18	15	4	34	75	19	0	0.666667	0	0	0	0	0	0	0	1	0	0
2730689	T	C	C	C	C	C	C	1	0.666667	1	0.5	0.5	0.714286	2	3	2	4	4	7	0	1	0	0	0	0	0	0	0	0	0	0
81016774	C	T	T	T	T	T	T	0.52459	1	0.692308	0.553846	1	1	61	57	13	65	54	56	0	0	0	0	1	0	0	0	0	0	0	0.4
36200700	A	T	T	T	C	T	T	0.666667	1	0.7	1	1	0.666667	3	2	10	2	4	3	0	0	0	0	0	0	0	0	0.666667	1	0	0
10396511	T	C	C	C	C	C	C	0.571429	1	1	1	1	0.5	7	8	6	10	19	16	0	0	0	0	0.705882	0	0	0	0	0	0	1
19281897	T	C	C	C	C	C	C	0.363636	1	1	1	1	1	11	4	2	7	5	5	1	0	0	0	0	0	0	1	0	0	0	0
50424606	G	T	T	T	T	T	T	0.857143	0.5	1	1	1	1	7	4	3	4	4	8	1	0	0	0	0	0	0	0	0	1	0	0
16933833	T	C	C	C	C	C	C	0.666667	0.75	0.571429	1	0.529412	0.529412	3	8	7	8	17	17	0	0	0	0	0	0.692308	0	0	0	0	0	0
56359214	C	T	T	T	T	T	T	0.666667	0.4	1	0.714286	1	1	21	15	8	14	11	17	0	0	0	0	0.428571	0	0	0	0.5	0	0.5	0
44972997	C	T	T	T	T	T	T	1	0.6	0.5	0.464286	0.285714	0.5	15	10	20	28	7	24	0	0	0	0	0	0	0	0	0	0	0	0
14535392	C	T	T	T	T	T	T	0.985748	0.491379	0.454545	0.305	0.519231	0.591065	421	348	176	400	312	291	0	0	0	0	0	0	0	0	0	0	0	0
87845734	C	T	T	T	T	T	T	1	0.333333	1	1	1	0.4	2	6	4	3	6	5	0	0.4	0	0	0	0	0	1	0	0	0	0
18652228	C	A	A	A	A	A	A	1	1	1	1	1	0.333333	6	2	8	4	5	6	1	0	0	0	0	0	0	0	1	0	0	0
25145740	G	T	T	T	T	T	T	1	1	1	1	1	1	8	5	13	4	11	12	0	0	0	0	0	0	1	0	0	0	0.666667	1
25176297	T	C	C	C	C	C	C	1	1	1	1	1	1	5	5	23	3	13	33	1	0	0	0	1	0	0	0	0.666667	0	0	0
40819949	T	C	C	C	C	C	C	1	1	1	1	1	1	4	3	5	6	5	7	0	0.5	0.5	0	0	0	0	0	0	1	0.666667	0
102517030	C	T	T	T	T	T	T	1	1	1	1	1	1	2	4	3	3	8	8	1	0	0	0	0	0	0	0	1	0	0	0.666667
4405023	G	A	A	A	A	A	A	0.607143	0.590909	0.615385	0.5625	0.47619	0.479452	28	44	39	32	42	73	0	0	0	0	0	0	0	0	0	0	0	0
80878031	A	G	G	G	G	G	G	1	0.513514	1	0.36	0.9375	1	39	37	15	25	16	38	0	0	0	0	0	0	0.466667	0	0	0	0.621622	0.391304
86833374	T	C	C	C	C	C	C	1	1	1	0.4	0.428571	1	1	6	2	5	7	5	0	0	0	0	0	0	0	0	1	0	0	0.5
113611955	T	C	C	C	C	C	C	1	0.833333	0.5	1	1	0.487179	18	18	4	25	22	39	0	0.5	0	0	1	0	0	0	0	0	0	0
42621003	A	G	G	G	G	G	G	1	1	1	1	1	0.7	3	3	5	4	5	10	1	0	0	0	0	0	0	0	0	0.8	0.583333	0
117177925	A	C	C	C	C	C	C	0.5	0.583333	0.607143	1	1	1	24	24	28	21	14	20	0	0	0.375	0	0	1	0	0	0	0	0	0
51245613	T	G	G	G	G	G	G	0.404255	1	1	0.916667	1	1	47	31	42	12	25	44	0	0.484375	0	0	0	0.276596	0	0	0	0	0.647059	0.6
65932060	T	C	C	C	C	C	C	1	0.666667	1	0.25	1	0.75	2	3	2	8	4	4	0	0.555556	0	0	0	0	0.8	0	0	0	0	0
56574802	C	G	G	G	G	G	G	0.407692	1	1	1	1	0.449735	130	104	62	135	96	189	0	0.443089	0.343434	0.425532	0.348993	0	0	0	0	0	0	0
43467801	G	T	T	T	T	T	T	0.933333	1	0.5	1	0.454545	0.512821	15	17	4	13	11	39	0.533333	0	0	0	0	0.576923	0	0	0	0	0	0
70220342	A	G	G	G	G	G	G	0.8	1	1	1	1	0.625	10	2	6	9	7	8	0	1	0	0	0	0.518519	0	0	0	0.2	0.416667	0
26736014	C	T	T	T	T	T	T	0.361702	0.669643	1	0.578313	0.31405	0.363636	94	112	93	83	121	99	0	0	0	0	0	0	0	0	0	0	0	0
22026176	C	T	T	T	T	T	T	0.545455	1	1	1	1	0.6	11	9	4	5	10	5	0	0	0	0	0	0	0.769231	0	0.714286	0	0	0.375
100479019	A	G	G	G	G	G	G	0.479167	0.655172	1	0.606061	0.5	1	48	29	66	33	60	80	0	0	0.416667	0.546218	0	0	0	0	0	0	0	0
61446724	G	A	A	A	A,T	A	A	1	0.428571	1	1	1	1	4	7	10	11	10	17	0	0.384615	0	0	0	0	0	0	0.6	0.5	0	0.666667
19305328	T	C	C	C	C	C	C	0.4375	1	1	1	0.833333	1	16	11	4	2	6	16	0	1	0	1	0	0	0	0	0	0	0	0
86948623	A	G	G	G	G	G	G	1	0.6	1	1	0.666667	1	9	5	4	3	6	2	0	0	0	1	0	0	0	0	0	0	0	1
3387078	G	A	A	A	A	A	A	1	0.666667	1	1	1	0.6	5	6	4	10	5	5	0	0	0	0	0	1	0	1	0	0	0	0
45670186	A	C	C	C	C	C	C	0.8	1	0.666667	1	1	1	5	2	3	4	8	6	0.6	0	0	0	0.6	1	0	0	0	0	0	0
50687829	A	G	G	G	G	G	G	0.705882	0.529412	0.705882	0.428571	0.666667	0.222222	17	17	17	7	9	18	0	0	0	0	0	0	0	0	0	0	0	0
75473366	A	G	G	G	G	G	G	0.4	1	1	1	1	0.3	20	16	9	8	10	10	0	0	0	1	0	0	0	0	0	0	0.444444	0
45919056	A	G	G	G	G	G	G	1	1	1	1	1	1	3	3	2	2	4	3	1	1	0	0	0	0	0	0	0	0.75	0	0
65559088	A	G	G	G	G	G	G	1	1	1	1	1	1	4	12	8	6	2	7	0	0	0	0	0	0.75	0	0	0	1	1	0
65559093	T	C	C	C	C	C	C	1	1	1	1	1	1	4	12	6	6	2	7	0	0	0	0	0	0.75	0	0	0	1	1	0
2735611	G	C	C	C	C	C	C	1	1	1	1	1	1	5	5	2	6	4	7	0	0	0	0	0	0	0	1	0	0.75	1	0
5440521	T	G	G	G	G	G	G	1	1	1	1	1	1	10	4	6	14	5	8	0.75	1	0	0	0	0	0	0	0	0	1	0
105510178	C	G	G	G	G	G	G	1	1	1	1	1	1	2	2	3	2	3	2	1	0	0	1	0.75	0	0	0	0	0	0	0
15036300	T	C	C	C	C	C	C	1	1	1	1	0.4	0.5	2	2	3	4	5	4	0	0	0.666667	0	0	1	0	0	0	0	0	0
33089474	G	A	A	A	A	A	A	0.555556	1	0.285714	0.526316	1	0.508772	18	23	28	19	29	57	0	0	0	0	0	0	0	0.222222	0	0	0	0.428571
79824444	T	C	C	C	C	C	C	1	1	0.5	0.75	0.666667	0.304348	9	7	12	4	3	23	0	0	0	0	1	0	0	0	0	0	0	0
25224282	G	A	A	A	A	A	A	0.384615	1	1	1	1	0.833333	13	6	6	4	4	12	1	0	1	0	0	0	0	0	0	0	0	0
117674472	G	T	T	T	T	T	T	1	0.625	1	0.75	1	1	8	8	2	4	2	5	0	0	0.666667	0.5	0	0	1	0	0	0	0	0
110374626	C	T	T	T	T	T	T	0.333333	1	1	1	1	1	33	25	3	17	20	26	0	0	0.333333	0.454545	0.615385	0.533333	0.192308	0	0	0	0	0
14615303	G	A	A	A	A	A	A	0.344828	1	1	1	1	1	29	5	8	4	5	2	0.128205	0	0	0	0	0	0	0	0	0.346154	1	0.666667
22851794	A	G	G	G	G	G	G	1	1	1	1	1	1	6	2	2	2	21	5	0	0.8	0	0	1	0	0	0	0	0	1	0
68125162	T	C	C	C	C	C	C	1	1	1	1	1	1	4	4	4	4	3	2	0	0	0	0	1	1	0	0	0	0	0.8	0
57743378	T	C	C,A	C,A	C	C,A	C	0.6	1	1	1	1	0.6	10	10	8	7	6	5	0	1	0	0	0	0	0	0	0	0	1	0
88263733	A	G	G	G	G	G	G	0.466667	0.466667	0.304348	0.461538	1	0.5	45	30	69	13	17	40	0	0	0	0	0	0	0	0	0	0	0	0
70220343	A	C	C	C	C	C	C	0.8	1	1	1	1	0.625	10	2	6	9	5	8	0	1	0	0	0	0.48	0	0	0	0.333333	0.416667	0
18353002	C	A	A	A	A	A	A	1	0.333333	0.25	1	0.583333	0.722222	6	9	8	8	12	18	0	0.454545	0	0	0	0	0	0.25	0	0	0	0
43903648	T	G	G	G	G	G	G	1	1	1	0.655172	1	0.444444	15	15	10	29	27	27	0.527778	0	0	0	0	0	0.461538	0.375	0	0	0.551724	0
87283120	G	A	A	A	A	A	A	1	0.513514	1	1	0.530864	0.585034	56	37	53	77	81	147	0	0.523438	0	0	0	0	0	0.581818	0	0	0	0.340909
51188756	A	G	G	G	G	G	G	0.333333	0.777778	1	0.37931	1	0.384615	6	9	6	29	5	13	0.162791	0	0	0	0	0	0	0	0	0.533333	0	0
29119232	A	C	C	C	C	C	C	0.6	0.666667	1	1	1	0.4	5	3	5	3	2	5	0	0	0	0	0	0	0	0	0	1	0.5	0
98969875	C	T	T	T	T	T	T	1	1	1	0.5	0.666667	1	3	2	4	4	3	5	1	0	0	0	0	0	0	0	0	0	1	0
16354661	C	A	A	A	A	A	A	1	1	1	1	1	1	3	5	2	4	4	6	1	0	0	1	0	0.833333	0	0	0	0	0	0
20697670	G	C	C	C	C	C	C	1	1	1	0.545455	0.423077	1	9	16	7	11	26	37	0	0	0	0	0	0	0.5	0	0.833333	0.470588	0	0
33237226	T	G	G	G	G	G	G	0.583333	0.549451	0.702703	0.333333	0.5	0.493274	60	91	74	24	182	223	0	0	0	0	0	0	0	0	0	0	0	0
38269648	G	C	C	C	C	C	C	0.894737	1	1	1	1	0.705882	19	18	8	29	21	17	0	0.5	0.428571	0.740741	0.777778	0	0	0	0	0	0	0
28505677	T	C	C	C	C	C	C	0.684289	0.621429	0.668317	0.620366	0.992095	0.43913	1343	560	202	2023	759	230	0	0	0.241199	0	0	0.636761	0	0	0	0	0	0
64512240	T	C	C	C	C	C	C	0.857143	1	1	1	0.636364	0.6875	7	4	10	4	11	16	0	0.384615	0.444444	0.405405	0.451613	0.347826	0	0	0	0	0	0
111430815	C	T	T	T	T	T	T	0.522222	1	1	0.991304	1	0.54955	90	111	68	115	90	111	0	0.556452	0	0	0.37037	0	0	0.584615	0	0	0	0.409091
84269331	G	A	A	A	A	A	A	1	0.666667	1	1	0.454545	0.6875	14	3	6	2	11	16	0	1	0	0	0.666667	0	0	0	0	0	0	0
8196730	C	T	T	T	T	T	T	1	0.833333	1	0.75	1	1	15	12	10	8	8	12	0	0.444444	0	0	0	0	1	0	0	0	1	0
1466733	C	T	A	A	A	A	A	1	0.2	0.368421	0.548387	0.447368	1	2	15	19	31	38	46	0	0	0	0	0	0	0	0.428571	0	0	0	0
119634211	C	T	T	T	T	T	T	0.426357	1	1	1	0.666667	0.558559	129	124	81	136	57	111	0	0	0	0	0	0	0.591837	0	0	0.496241	0.44086	0
16933869	C	G	G	G	G	G	G	0.5	0.875	0.5	1	0.636364	0.5	4	8	8	9	11	16	0	0	0	0	0	0.888889	0	0	0	0	0	0
100421597	A	G	G	G	G	G	G	0.428571	0.571429	1	0.5	0.636364	0.923077	28	14	35	8	11	26	0	0	0.444444	0.5	0	0	0	0	0	0	0	0
18353057	T	C	C	C	C	C	C	1	0.5	0.25	1	0.454545	0.75	6	14	8	10	11	24	0	0.647059	0	0	0	0	0	0.2	0	0	0	0
28608038	T	C	C	C	C	C	C	1	0.52381	0.589744	0.5	0.538462	1	30	21	39	18	13	25	0	0	0	0	0	0	0	0	0	0.333333	0	0.714286
6401158	A	G	G	G	G	G	G	1	1	1	1	1	1	9	3	4	8	2	2	0	0.565217	0	0	0	0.333333	0	0.4	0.6	1	0	0
20173790	A	G	G	G	G	G	G	0.444444	0.714286	0.5	1	1	1	9	7	4	8	2	4	0.25	0	0	0	0	0	0	0	1	0.307692	0	0
45751904	C	T	T	T	T	T	T	0.3	1	1	0.8	0.5	0.5	10	2	2	5	6	4	0	0	0	0	0	0	0	0	0	0	0	1
70201887	T	G	G	G	G	G	G	1	1	0.764706	0.714286	0.52381	0.342857	2	12	17	7	21	35	0	1	0	0	0	0	0	0	0	0	0.25	0
12685489	C	T	T	T	T	T	T	1	1	1	1	1	0.428571	8	3	14	4	3	7	0	0	0	0	0	0	0	1	0	0.333333	1	0
7608756	A	G	G	G	G	G	G	0.428571	1	1	1	0.5	0.666667	7	6	2	2	4	6	0.5	0	0	0	0	0	0	0	0	0	1	0
64513504	A	G	G	G	G	G	G	0.616438	0.677419	1	1	0.47619	0.426471	73	31	43	41	63	68	0.413793	0	0	0	0.358974	0	0	0	0	0	0.328767	0
89344678	G	A	A	A	A	A	A	0.502882	0.438503	0.537604	0.997959	0.994609	0.452077	694	748	718	980	371	626	0	0	0	0	0	0	0.378676	0	0	0	0.458702	0
53160068	A	G	G	G	G	G	G	0.333333	0.75	1	1	1	1	6	4	7	2	15	11	0	0	0	0	0	0	0	0	1	0	1	0
15862125	G	A	A	A	A	A	A	1	0.75	0.4	1	0.294118	1	9	8	5	10	34	37	0	0	0	0	0	0	0	0	0	0	1	0.363636
28333618	G	T	T	T	T	T	T	0.966667	0.972222	1	0.976378	0.911765	0.967972	60	36	8	127	136	281	0	0.970526	0	0	0	0	0	0.363636	0.530466	0.85	0	0
53843275	C	G	G	G	G	G	G	1	0.983333	1	0.428571	1	1	78	60	34	98	42	57	0	0	0	0	0.410959	0	0	0.421687	0.5	0	0	1
100478982	G	A	A	A	A	A	A	0.47619	0.571429	1	0.517241	0.446809	1	42	42	71	29	47	71	0	0	0.444444	0.492188	0	0	0	0	0	0	0	0
15836652	A	G	G	G	G	G	G	1	1	1	1	0.73913	1	4	4	2	2	23	6	0	0	0	0	0	1	0	0	0	0	1	0.666667
56853233	C	T	T	T	T	T	T	0.333333	0.416667	1	0.75	0.266667	1	12	12	2	12	15	11	0	0	0	0	0	0	0	0	0	0	0.7	0
42620954	C	T	T	T	T	T	T	1	1	1	1	1	0.666667	4	3	3	3	4	3	1	0	0	0	0	0.5	0	0	0	0.5	0.6	0
10146072	A	G	G	G	G	G	G	0.4	1	0.991304	0.510638	1	0.548872	95	121	115	94	89	133	0	0	0	0	0	0	0	0	0.507463	0.512195	0.37037	0
31863316	A	G	G	G	G	G	G	0.571429	0.7	1	0.454545	1	1	7	10	15	11	3	5	0	0	0	0	0	0	0.5	0	0	0	0.5	0.666667
89838827	C	T	T	T	T	T	T	1	0.833333	1	1	1	1	11	6	15	2	16	23	0.375	0.4	0	0	0	0.5	1	0	0	0	0	0.5
117177930	C	T	T	T	T	T	T	0.5	0.565217	0.645161	1	1	1	26	23	31	21	14	17	0	0	0.5	0.153846	0	1	0	0	0	0	0	0
80879329	A	G	G	G	G	G	G	0.823529	0.318182	1	0.5625	0.555556	1	17	22	12	16	18	23	0	0	0	0	0	0	0.653846	0	0	0	0.55	0
74740712	A	G	G	G	G	G	G	1	0.8	1	1	1	1	4	10	4	7	2	3	0	0.75	0	0	0	0	1	0	0	1	0	0
77238941	A	G	G	G	G	G	G	1	0.625	1	1	1	1	20	8	22	13	12	14	0	0	0	0	0.190476	0.264706	0.4375	0	0.416667	0	0.266667	1
12685483	T	A	A	A	A	A	A	1	1	1	1	1	0.428571	8	3	13	3	2	7	0	0	0	0	0	0	0	1	0	0.384615	1	0
21220666	T	C	C	C	C	C	C	0.380952	1	1	1	1	0.357143	21	8	8	8	2	14	0	1	0.7	0	0	0	0	0	0	0	0	0
4598642	T	G	G	G	G	G	G	0.474874	0.488806	0.468354	0.55	0.516393	0.538136	398	268	632	100	244	472	0	0	0	0	0	0	0	0	0	0	0	0
89798766	G	A	A	A	A	A	A	1	0.5	1	0.4	1	1	3	4	13	5	11	9	0.272727	0	0	0.375	0	0.857143	0	0	0	0	0	0.375
121206432	C	T	T	T	T	T	T	0.62963	1	0.5	0.705882	0.52	0.4	27	12	8	17	25	25	0	0.451613	0	0	0	0	0.285714	0	0	0	0	0
31863308	C	G	G	G	G	G	G	0.5	0.7	1	0.416667	1	1	8	10	12	12	2	6	0	0	0	0	0	0	0.5	0	0	0	0.5	0.6
24845955	A	G	G	G	G	G	G	1	1	1	1	1	0.8	3	5	6	2	5	5	0	0	1	0	1	0.285714	0	0	0	0.5	0	0
30728396	G	T	T	T	T	T	T	0.769231	0.352941	0.690476	1	1	0.761905	52	34	42	45	42	105	0	0	0	0	0	1	0	0	0	0.561644	0	0
24973441	T	C	C	C	C	C	C	1	1	1	1	1	1	33	68	17	5	5	9	0.689655	0	0	0	0	0.666667	0	0	0.636364	0	0	1
29119238	T	C	C	C	C	C	C	0.5	0.666667	1	1	1	0.333333	4	3	5	4	2	6	0	0	0	0	0	0	0	0	0	1	0.5	0
67160703	C	T	T	T	T	T	T	1	0.4	1	1	1	0.6	4	5	2	2	3	5	1	0	0	1	0	0	0	0	0	0	0	0
7619725	A	C	C	C	C	C	C	1	1	1	0.666667	1	1	2	4	2	3	8	10	0	1	0	0	0	1	0	0	0	0.666667	0	0
7655866	G	A	A	A	A	A	A	1	1	1	1	1	1	3	4	15	2	4	3	1	0	0	1	1	0	0	0	0	0	0	0
7683140	A	T	T	T	T	T	T	1	1	1	1	1	1	9	5	2	9	12	4	0	0	0	0	0	0	0	0	1	0	1	1
7683284	A	G	G	G	G	G	G	1	1	1	1	1	1	5	2	9	2	5	6	1	0	0	0	0	0	1	0	0	1	0	0
26673298	T	C	C	C	C	C	C	1	1	1	1	1	1	4	8	3	10	9	5	0	0	0	0	1	1	0	0	0	1	0	0
87459374	C	G	G	G	G,T	G	G	1	1	1	1	1	1	3	4	4	2	2	3	0	0	0	1	0	1	1	0	0	0	0	0
103364472	T	C	C	C	C	C	C	1	1	1	1	1	1	7	2	4	5	4	5	0	0	0	0	0	1	0	0	1	0	1	0
21667075	G	T	T	T	T	T	T	1	1	1	1	1	1	7	3	1	2	2	6	0	0	0	0	0	1	0	0	0	1	0	1
68302686	G	A	A	A	A	A	A	1	1	1	1	1	1	23	10	3	5	12	13	1	0	0	0	0	1	0	0	0	1	0	0
32627680	G	C	C	C	C	C	C	1	1	1	1	1	1	4	6	10	2	4	9	0	0	0	0	0	0	0	0	0	1	1	1
73729967	T	A	A	A	A	A	A	1	1	1	1	1	1	4	8	9	6	3	3	0	1	0	0	0	0	0	0	1	1	0	0
621863	T	A	A	A	A	A	A	1	1	1	1	1	1	4	2	2	4	3	2	0	0	0	0	0	0	0	1	0	1	0	1
65559130	G	T	T	T	T	T	T	1	1	1	1	1	1	3	9	7	3	2	7	0	0	0	0	0	1	0	0	0	1	1	0
1542879	C	A	A	A	A	A	A	1	1	1	1	1	1	3	2	6	3	2	4	0	0	0	0	0	0	0	0	1	1	1	0
1542899	A	G	G	G	G	G	G	1	1	1	1	1	1	4	3	6	3	2	4	0	0	0	0	0	0	0	0	1	1	1	0
1542919	A	G	G	G	G	G	G	1	1	1	1	1	1	5	4	6	3	2	4	0	0	0	0	0	0	0	0	1	1	1	0
26510782	C	A,G	G	G	G	G	G	1	1	1	1	1	1	3	2	3	3	4	2	1	0	0	0	0	0	0	0	0	1	0	1
65823346	T	C	C	C	C	C	C	1	1	1	1	1	1	2	3	1	3	7	8	0	0	1	0	0	1	0	0	0	1	0	0
5440402	G	A	A	A	A	A	A	1	1	1	1	1	1	9	3	11	4	5	8	0	1	0	1	0	0	0	0	0	0	1	0
7935169	G	A	A	A	A	A	A	1	1	1	1	1	1	3	4	6	2	4	5	0	1	0	1	0	0	0	0	1	0	0	0
19884941	T	C	C	C	C	C	C	1	1	1	1	1	1	10	10	5	16	11	19	1	0	0	0	0	0	0	0	1	0	0	1
19884962	T	C	C	C	C	C,A	C,A	1	1	1	1	1	1	12	12	6	19	17	24	1	0	0	0	0	0	0	0	1	0	0	1
19885006	G	T	T	T	T	T	T	1	1	1	1	1	1	23	17	11	25	43	32	1	0	0	0	0	0	0	0	1	0	0	1
19885027	T	C	C	C	C	C	C,G	1	1	1	1	1	1	21	20	10	25	46	27	1	0	0	0	0	0	0	0	1	0	0	1
59854022	T	C	C	C	C	C	C	1	1	1	1	1	1	4	6	2	4	4	4	0	0	0	1	0	1	0	0	0	0	1	0
59983203	A	G	G	G	G	G	G	1	1	1	1	1	1	7	5	2	2	5	5	0	0	1	0	0	1	0	1	0	0	0	0
92133074	A	C	C	C	C	C	C	1	1	1	1	1	1	2	5	13	3	3	4	0	0	0	0	0	0	0	0	1	1	1	0
126617672	C	A	A	A	A	A	A	1	1	1	1	1	1	3	2	6	2	15	4	0	0	0	0	0	1	0	0	0	1	1	0
140402220	A	T	T	T	T	T	T	1	1	1	1	1	1	8	5	6	6	3	4	0	0	1	1	0	1	0	0	0	0	0	0
21722531	C	T	T	T	T	T	T	1	1	1	1	1	1	2	2	2	2	2	9	1	0	0	0	0	0	0	1	0	1	0	0
25152153	T	G	G	G	G	G	G	1	1	1	1	1	1	3	8	9	2	12	14	0	1	0	0	0	1	0	0	0	0	0	1
28326159	G	C	C	C	C	C	C	1	1	1	1	1	1	1	4	3	5	9	4	0	1	0	0	0	1	0	1	0	0	0	0
61615550	A	G	G	G	G	G	G	1	1	1	1	1	1	5	3	8	6	9	10	0	0	0	0	0	0	0	0	1	1	0	1
22983091	C	T	T	T	T	T	T	1	1	1	1	1	1	2	2	9	3	4	2	0	0	0	0	0	0	1	0	1	1	0	0
48298269	T	C	C	C	C	C,A	C	1	1	1	1	1	1	6	2	4	4	4	6	0	1	0	0	1	0	0	0	1	0	0	0
13045172	T	A	A	A	A	A	A	1	1	1	1	1	1	3	2	4	2	2	2	0	1	0	0	0	0	0	1	0	1	0	0
15240327	A	G	G	G	G	G	G	1	1	1	1	1	1	2	4	7	2	5	6	0	0	0	1	0	1	0	0	0	0	1	0
15243172	G	A	A	A,T	A	A	A	1	1	1	1	1	1	5	2	11	2	2	5	0	0	0	0	1	1	0	0	0	1	0	0
15698993	N	G	G	G	G	G	G	1	1	1	1	1	1	2	2	4	1	3	6	1	1	0	0	0	0	0	0	0	1	0	0
33182228	G	A	A	A	A	A	A	1	1	1	1	1	1	2	2	8	4	4	5	0	0	1	1	0	0	0	0	0	1	0	0
26830447	G	A	A	A	A	A	A	1	1	1	1	1	1	3	5	3	2	2	2	0	0	0	1	0	1	0	0	0	0	1	0
33085475	A	G	G	G	G	G	G	1	1	1	1	1	1	2	4	8	5	8	12	1	1	0	0	0	0	0	0	0	0	1	0
25271451	G	C	C	C	C	C	C	1	1	1	1	1	1	2	3	6	8	3	2	0	0	0	0	0	0	0	1	0	1	0	1
67063702	A	G	G	G	G	G	G	1	1	1	1	1	1	5	4	2	2	2	2	0	0	0	1	0	0	0	0	0	0	1	1
28373349	G	A	A	A	A	A	A	1	1	1	1	1	1	5	2	2	3	5	2	0	1	0	1	0	0	0	0	1	0	0	0
28373354	G	A	A	A	A	A	A	1	1	1	1	1	1	5	2	2	3	3	2	0	1	0	1	0	0	0	0	1	0	0	0
92816277	C	T	T	T	T	T	T	1	1	1	1	1	1	5	5	2	2	2	3	0	0	0	0	0	0	0	0	1	0	1	1
106399915	G	A	A	A	A	A	A	1	1	1	1	1	1	2	3	6	2	2	3	0	0	0	0	0	0	1	0	0	1	1	0
106399916	A	G	G	G	G	G	G	1	1	1	1	1	1	2	4	5	2	2	2	0	0	0	0	0	0	1	0	0	1	1	0
35669217	T	A	A	A	A	A	A	1	1	1	1	1	1	14	13	2	5	5	7	1	0	1	0	0	0	0	1	0	0	0	0
110997673	A	G	G	G	G	G	G	1	1	1	1	1	1	11	9	6	15	10	12	1	0	0	0	0	0	0	0	1	0	0	1
110997694	C	A	A	A	A	A	A	1	1	1	1	1	1	16	12	5	17	14	16	1	0	0	0	0	0	0	0	1	0	0	1
110997725	C	T	T	T	T	T	T	1	1	1	1	1	1	23	15	8	26	22	24	1	0	0	0	0	0	0	0	1	0	0	1
110997738	A	G	G	G	G	G	G	1	1	1	1	1	1	24	16	8	30	21	30	1	0	0	0	0	0	0	0	1	0	0	1
110997759	A	G	G	G	G	G	G	1	1	1	1	1	1	24	17	9	33	24	33	1	0	0	0	0	0	0	0	1	0	0	1
110997801	A	G	G	G	G	G	G	1	1	1	1	1	1	21	11	9	18	18	36	1	0	0	0	0	0	0	0	1	0	0	1
110997846	T	C	C	C	C	C	C	1	1	1	1	1	1	11	6	17	14	11	26	1	0	0	0	0	0	0	0	1	0	0	1
110997868	A	G	G	G	G	G	G	1	1	1	1	1	1	11	7	17	10	14	27	1	0	0	0	0	0	0	0	1	0	0	1
110997910	G	A	A	A	A	A	A	1	1	1	1	1	1	9	4	10	7	11	15	1	0	0	0	0	0	0	0	1	0	0	1
110997949	A	G	G	G	G	G	G	1	1	1	1	1	1	4	3	9	10	11	6	1	0	0	0	0	0	0	0	1	0	0	1
110997951	A	G	G	G	G	G	G	1	1	1	1	1	1	4	3	9	10	9	6	1	0	0	0	0	0	0	0	1	0	0	1
110998137	A	G	G	G	G	G	G	1	1	1	1	1	1	9	2	4	15	7	12	1	0	0	0	0	0	0	0	1	0	0	1
83236237	T	C	C	C	C	C	C	1	1	1	1	1	1	4	4	4	5	2	3	0	0	0	0	0	1	0	0	0	1	1	0
20461817	T	C	C	C	C	C	C	0.428571	0.6	0.6	1	1	0.454545	21	5	5	4	2	11	0	0	0	0	0	0	0	0	0	0.333333	0.75	0
57964620	G	A	A	A	A	A	A	0.518519	0.791667	0.6	1	1	0.52	27	24	15	32	34	25	0	0	0.52	0.393939	0	0	0	0.518519	0	0	0	0
20698693	A	G	G	G	G	G	G	0.535985	1	0.982051	0.499266	0.537563	1	528	534	390	681	599	792	0	0	0	0	0	0	0.549213	0	0.469185	0.539347	0	0
28333625	A	T	T	T,C	T	T	T	0.964286	0.972973	1	0.983333	0.921875	0.982143	56	37	9	120	128	280	0	0.75914	0	0	0	0.353591	0	0.366667	0.536122	0.813559	0	0
42782368	G	A	A	A	A	A	A	0.25	1	1	0.411765	0.533333	0.583333	8	15	2	17	15	12	0	0	0	0	0	0.783784	0	0	0	0	0	0
80225992	C	T	T	T	T	T	T	1	1	1	0.636364	0.636364	1	17	17	18	33	11	28	0	0	0	0	0.615385	0	0	0.380952	0	0.666667	0	0.619048
7842188	C	T	T	T	T	T	T	0.384615	0.615385	0.555556	0.444444	0.8	0.588235	13	13	18	9	5	17	0	0	0	0	0	0	0	0	0	0	0	0.4
25852864	C	T	T	T	T	A	T	0.571429	0.666667	1	0.75	1	1	7	6	3	8	2	6	1	0	0	0	1	0	0	0	0	0	0	0
56574427	C	T	T	T	T	T	T	0.454545	1	1	1	1	0.424242	154	110	70	143	75	231	0	0.478927	0.490741	0.460377	0.464	0	0	0	0	0	0	0
27694229	G	A	A	A	A	A	A	0.8	0.571429	0.8	0.461538	0.923077	0.456522	5	7	5	13	13	46	0	0	0	0	0	0.2	0	0	0.428571	0.4	0	0
51374615	C	T	T	T	T	T	T	0.371134	0.444444	0.968254	0.445652	1	0.53271	97	90	63	92	52	107	0.383838	0	0	0	0	0	0	0	0	0.394958	0	0
7842191	A	G	G	G	G	G	G	0.333333	0.615385	0.533333	0.5	0.8	0.6	12	13	15	8	5	15	0	0	0	0	0	0	0	0	0	0	0	0.4
57146084	G	A	A	A	A	A	A	0.548387	0.368421	0.363636	0.470588	0.68	0.55	31	19	11	34	25	40	0	0	0	0	0	0	0	0	0	0	0	0
10147883	G	T	T	T	T	T	T	0.5	1	1	0.6	1	0.425	18	9	2	20	39	40	0	0	0	0	0	0	0	0	0.411765	0.466667	0.666667	0
1067864	C	T	T	T	T	T	T	1	0.404762	1	1	1	1	31	42	24	20	22	44	0	0	0	0	0.322581	0	0.384615	0	0.46	0.459459	0.5	0.304348
6860909	T	C	C	C	C	C	C	0.5	1	0.72	1	1	0.75	20	15	25	13	5	20	0	0	0	0	0	1	0	0	0	0	1	0
5955951	T	C	C	C	C	C	C	0.997561	0.456399	0.678571	0.995619	0.97048	0.994819	820	1422	28	913	271	579	0.398184	0	0	0	0	0	0.984848	0	0	0	0.316597	0.424799
53843219	G	A	A	A	A	A	A	1	0.965517	0.933333	0.443182	1	1	81	58	45	88	53	83	0	0	0	0	0.440678	0	0	0.5	0.432432	0	0	1
14741145	T	C	C	C	C	C	C	0.583333	1	1	1	1	1	12	13	12	4	19	12	0	0.363636	0	0	0	0	0	0.6	1	0	0	0.666667
49226793	G	A	A	A	A	A	A	1	0.333333	1	0.454545	0.347826	0.368421	27	24	35	22	23	19	0	0	0	0	0	0	0	0	0	0	0	0.555556
77239476	G	C	C	C	C	C	C	1	0.5	1	1	1	1	9	8	9	12	12	9	0	0	0	0	0	0.333333	0.352941	0	0.666667	0	0.2	1
20699801	G	T	T	T	T	T	T,A	0.454545	1	1	0.538462	0.5	1	11	11	7	13	6	12	0	0	0	0	0	0	0.833333	0	0.333333	0.380952	0	0
15709461	T	A	A	A	A	A	A	0.75	1	1	1	0.190476	1	4	2	2	3	21	5	0	0	0	0	0	0	0	1	0	0	0	1
28333621	G	C	C	C	C	C	C	0.981818	0.972973	1	0.983871	0.91129	0.981618	55	37	8	124	124	272	0	0.75974	0	0	0	0.382857	0	0.357895	0.55	0.842105	0	0
57317869	C	G	G	G	G	G	G	0.44588	0.990698	0.996979	0.99932	0.534702	0.533123	619	430	662	1471	1023	951	0	0	0.492829	0.525743	0	0.543179	0	0	0	0	0	0
9242413	A	G	G	G	G	G	G	1	1	1	0.78	0.991736	1	95	81	44	100	121	156	0.63253	0.637931	0	0	0	0.496644	0	0.566667	0.5	0	0	0
86458307	G	A	A	A	A	A	A	0.815451	1	0.656977	0.717073	1	0.748175	233	582	172	205	404	274	1	0	0	0	1	0	0	0	0	0	0	0
15406331	T	A	A	A	A	A	A	1	1	1	1	1	1	10	6	9	7	5	12	0	0	0	0.638889	0	1	0	1	0.25	0.176471	0	0
57146087	C	G	G	G	G	G	G	0.545455	0.428571	0.25	0.472222	0.653846	0.581395	33	21	12	36	26	43	0	0	0	0	0	0	0	0	0	0	0	0
41820909	G	A	A	A	A	A	A	0.545455	0.545455	1	1	0.307692	1	11	11	6	8	13	31	0	0	0.285714	0.454545	0	0.727273	0	0	0	0	0	0
11158538	A	G	G	G	G	G	G	0.5	1	1	1	1	0.428571	4	4	9	3	9	7	0	0	0	0	0	1	0	0	0	0	0	1
57502257	T	C	C	C	C	C	C	0.75	0.75	1	1	1	1	4	8	3	2	3	4	0	0	1	0.571429	0	0	0	0	0	1	0	0
1579753	G	A	A	A	A	A	A	0.25	0.2	1	1	1	1	12	15	12	3	6	8	0.3	0	0	0	1	0	0	0	0	0	0.222222	0
11496511	G	A	A	A	A	A	A	1	1	1	1	1	1	62	29	33	56	24	62	0.583333	0.662162	0	0	0.477273	0.465116	0	0	0	0.421053	0	0.470588
5754537	G	A	A	A	A	A	A	1	0.285714	0.625	1	1	0.409091	6	7	8	9	16	22	0.4	0	0	0	0	0	0	0	1	0	0	0
51262640	C	T	T	T	T	T	T	0.625	0.625	1	1	1	1	16	16	8	17	11	33	0.346154	0	0	0	0	1	0	0	0.153846	0.833333	0	0
84483048	C	T	T	T	T	T	T	1	1	1	1	1	0.583333	9	5	8	6	9	12	0	1	0	1	0	0	0	0	0	0.666667	0	0
117164328	A	G	G	G	G	G	G	0.484848	0.380952	0.414634	1	1	1	33	21	41	15	24	16	0	0	0.285714	0	0.454545	0.625	0	0	0	0	0	0
86450215	A	G	G	G	G	G	G	1	0.625	1	0.833333	0.5	0.5	2	8	6	12	20	8	0	0	0.666667	0	0	0.235294	0	0	0.642857	0	0	0
45593377	C	T	T	T	T	T	T	0.455738	0.475104	0.536913	0.44113	0.523546	0.480094	305	482	298	637	361	427	0	0	0	0	0	0	0	0	0	0	0	0
22262562	A	G	G	G	G	G	G	0.405405	0.47619	1	0.322581	0.48	0.606557	37	21	71	31	25	61	0.383333	0	0	0	0	0	0	0	0	0	0	0
28333627	G	C	C	C	C	C	C	0.964912	0.972973	0.888889	1	0.917293	0.975945	57	37	9	123	133	291	0	0.755694	0	0	0	0.345946	0	0.360825	0.534799	0.816667	0	0
16531528	C	A	A	A	A	A	A	1	0.5	1	0.222222	1	1	7	4	6	9	3	9	0	0.4	0	0	0	0	0.230769	0.285714	0.3125	0.588235	0	0
10937153	C	T	T	T	T	T	T	0.333333	1	1	1	1	1	6	17	9	2	2	3	0	0	0	0	0	1	0	0	0	1	0	0.428571
89310096	C	T	T	T	T	T	T	1	0.47619	0.487805	1	1	1	38	21	41	20	19	29	0	0	0	0	0	0.604317	0.65	0.5	0	0	0.318182	0
50845153	A	G	G	G	G	G	G	1	1	1	1	1	1	9	14	8	13	19	10	0.702703	0	0	0	0.190476	0.703704	0	0	0.3	0.545455	0	0.666667
100927080	C	T	T	T	T	T	T	0.644737	1	0.708333	0.590909	0.623529	1	76	47	48	132	85	242	0	0.496269	0	0	0.30597	0	0.517857	0	0	0.366864	0	0
1623847	G	T	T	T	T	T	T	0.75	1	1	1	1	1	24	20	8	12	2	9	1	0	0.166667	0.47619	0	0.5	0	0	0	0	0.727273	0
39013681	T	C	C	C	C	C	C	1	0.615385	1	0.25	1	0.3	16	13	6	12	11	20	0	0	0	0	0	0	0.375	0	0	0	0.357143	0.555556
34999356	A	C	C	C	C	C	C	1	1	1	0.666667	1	1	2	2	4	3	3	3	0	1	0	0	0	0.8	0	0	0	1	0	0
19951173	C	T	T	T	T	T	T	1	1	1	1	1	0.857143	6	2	2	1	2	7	0	0	0	0	0	0	0	0	0	1	1	1
24891908	G	T	T	T	T	T	T	1	1	1	1	0.857143	1	4	2	3	2	7	4	0	0	0	1	1	1	0	0	0	0	0	0
67160238	G	C	C	C	C	C	C	1	1	1	1	1	0.5	11	2	5	3	2	4	0	0	1	1	0	0.222222	0	0	0.428571	0	0	0
89838361	A	G	G	G	G	G,T	G	1	0.384615	1	0.571429	1	0.529412	11	13	21	7	5	17	0	0	0	0	0	0	0	0	0	0.636364	0	1
15406885	C	T	T	T	T	T	T	1	1	1	1	1	1	18	18	10	25	16	25	0	0	0.285714	0	0	1	0	0.972222	0.466667	0.428571	0	0
27865080	G	A	A	A	A	A	A	0.956873	0.932384	0.924051	0.929412	0.936611	0.58814	371	281	79	765	773	1231	0.66348	0.254861	0	0	0.529661	0	0	0	0	0.768293	0.206704	0
76918805	T	A	A	A	A	A	A	0.416667	1	1	1	0.222222	0.2	12	16	2	7	9	20	0	0	0	0	0	1	0	0	0	0	0	0
59139482	G	A	A	A	A	A	A	1	1	1	1	0.5	1	3	5	3	5	4	6	0	0	0	0	0	0	0	0	0.666667	1	0	1
103984351	G	A	A	A	A	A	A	1	1	1	0.5	1	1	2	6	4	6	5	2	0	0	0	1	0.666667	0.5	0	0.5	0	0	0	0
14741132	A	G	G	G	G	G	G	0.5	1	1	1	1	1	10	13	10	4	20	12	0	0.5	0	0	0	0	0	0.5	1	0	0	0.666667
26158022	C	A	A	A	A	A	A	1	1	1	1	1	1	3	9	4	3	2	7	0	0	1	0.666667	0	1	0	0	0	0	0.5	0
85948877	T	C	C	C	C	C	C	0.75	1	1	1	0.9	1	8	8	8	16	10	9	1	0	0	0	0	0	0	0	0.818182	0	0	1
28034020	C	T	T	T	T	T	T	0.4	1	1	1	1	1	5	4	7	4	2	3	0	0	0	0	0.8	0.533333	0	0.666667	0	0	0	0.571429
34808155	C	T	T	T	T	T	T	0.352941	0.818182	0.333333	0.53125	0.6	0.192308	17	22	18	32	20	26	0	0	0	0	0	0	0	0	0	0	0	0
4947400	A	G	G	G	G	G	G	1	1	1	1	0.714286	1	6	4	2	6	21	23	0.588235	0.8	0	0	0	0	0	1	0	0	0.5	0
128883	C	A	A	A	A	A	A	1	1	1	1	1	1	6	11	4	5	2	2	0	0	0	0	0	0	0.181818	0	1	1	1	0
77598711	G	T	T	T	T	T	T	0.5	0.857143	1	1	0.454545	0.4	12	14	9	17	11	10	0	0	0.666667	0.32	0	0.157895	0	0.25	0	0	0	0
67301867	A	T	T	T	T	T	T	1	0.666667	1	0.75	1	1	21	6	4	8	2	6	0	0	0	0	0	0	0	1	0.6	0	0	1
65470669	A	G	G	G	G	G	G	1	0.636364	0.764706	1	0.8	1	10	11	17	8	15	16	0.235294	0	0.222222	0.555556	0	0	0	0.666667	0	0	0.705882	0
86024771	G	A	A	A	A	A	A	0.590909	0.586207	0.978723	0.684932	0.518519	0.527778	22	58	47	73	54	36	0	0	0	0	0.530612	0.541667	0	0	0	0	0	0
21837037	T	C	C	C	C	C	C	1	1	1	1	1	1	3	3	2	4	16	17	0.857143	0	1	1	0	0	0	0	0	0.333333	0	0
7842204	A	G	G	G	G	G	G	0.5	0.615385	0.615385	0.428571	0.8	0.6	8	13	13	7	5	10	0	0	0	0	0	0	0	0	0	0	0	0.75
16933941	G	A	A	A	A	A	A	0.4	0.5	0.5	1	0.6	0.588235	5	6	6	8	5	17	0	0	0	0	0	0.785714	0	0	0	0	0	0
42655457	T	C	C	C	C	C	C	0.666667	1	1	1	1	0.8	3	5	2	4	5	5	0	0	0	0	0	0	0	1	0.666667	0	0	1
9274888	T	A	A	A	A	A	A	0.8	1	1	1	1	1	5	3	2	3	2	8	1	1	0	0	0	0	0	0	0	0	1	0
76853295	G	A	A	A,T	A	A	A	1	0.866667	1	1	0.8	1	20	15	14	3	5	69	0	0	0	0.363636	0.5	0.3	0	0	0.714286	0	0	1
45741384	G	T	T	T	T	T	T	0.535714	0.638889	0.15	0.434783	0.428571	0.6	28	36	20	23	49	15	0	0	0	0	0	0	0	0	0	0	0	0
68012728	T	C	C	C	C	C	C	0.857143	0.75	0.888889	1	1	0.5	7	8	9	3	3	6	0.666667	0	0	0	0	0	0	0.666667	0.5	0	0.375	0
15082678	T	A	A	A	A	A	A	0.285714	1	1	1	1	1	7	6	3	2	7	11	1	1	0	0	0	0	0	0	0	0	0.5	0
45475858	G	C	C	C	C	C	C,A	0.714286	1	1	1	0.5	1	7	7	10	2	4	9	0	0	0	0	0	0.428571	0	0	0	0	1	1
6860825	G	C	C	C	C	C	C	0.9375	1	0.571429	1	1	0.705882	16	14	14	8	12	17	1	0.222222	0	0	0	0	0	0	0	0.375	0.833333	0
62070112	T	C	C	C	C	C	C	1	1	1	1	1	1	6	4	2	16	9	12	0.703704	0.6	0	0.666667	0.545455	0	0	0	0.7	0	0	0
74043486	A	G	G	G	G	G	G	0.230769	1	1	1	1	1	13	13	18	15	10	16	0	0.875	0.25	0.823529	0	0.5	0	0	0	0	0	0
1122573	C	T,G	T	T,G	T	T,G	T,G	1	1	1	1	1	1	15	7	9	12	5	11	0	0	0	0	0.5	0.333333	0	0	0	0.384615	1	1
7841545	C	A	A	A	A	A	A	0.64	0.75	0.5	0.7	0.6	0.684211	25	28	22	10	5	38	0	0	0	0	0	0	0.692308	0	0	0	0	0.4
45434562	C	T	T	T	T	T	T	0.636364	1	1	1	1	1	11	13	9	11	5	7	0	0	0	0	0	0	0.428571	0.428571	0	0	1	1
128945	A	C	C	C	C	C	C	1	1	1	1	1	1	4	6	4	6	2	4	0	0	0	0	0	0	0.222222	0	1	1	1	0
7659502	C	G	G	G	G	G	G	0.75	0.846154	1	0.625	1	1	8	13	26	8	15	28	0	0	0.192308	0.585366	0	0	0	0	0	0.666667	0	1
16933917	A	G	G	G	G	G	G	0.4	0.571429	0.428571	1	0.625	0.5	5	7	7	8	8	18	0	0	0	0	0	0.75	0	0	0	0	0	0
4411087	T	C	C	C	C	C	C	0.392857	0.4	0.642857	0.285714	0.615385	0.434783	28	20	28	7	13	23	0	0	0	0	0	0	0	0	0	0	0	0
96579773	C	T	T	T	T	T	T	1	1	1	1	1	1	16	19	2	13	17	9	0	0.8	0	0.5	1	0.181818	0	0	0	0.75	0	0
9783773	G	A	A	A	A	A	A	1	1	1	0.363636	1	1	13	14	2	11	15	21	0.233333	0	0	0	0.416667	0.307692	0.388889	1	0	0.25	0	0
63550568	C	T	T	T	T	T	T	0.375	1	1	1	1	0.636364	8	20	2	14	6	11	0.37037	0	0	0	0.375	0.5	0	1	0	0	0	0
39884339	G	A	A	A	A	A	A	0.8	1	1	1	1	0.964286	5	6	3	16	16	28	1	0	0	0	0	0	0	0	1	0	0	1
18351898	G	A	A	A	A	A	A	1	0.515152	0.7	0.947368	0.488372	0.636364	26	33	10	19	43	44	0	0.348837	0	0	0	0	0	0.45	0	0	0	0.724138
88405748	C	T	T	T	T	T	T	0.25	0.818182	0.333333	0.666667	1	0.586207	20	11	21	18	22	29	0	0	0	0	0	0	0	0	0.375	0.517241	0	0
65826755	C	T	T	T	T	T	T	1	1	0.785714	1	0.68	1	16	19	14	14	25	44	0	0	0	0	0.461538	0	0.7	0.6	0	0	0.357143	0.588235
86473355	C	T	T	T	T	T	T	0.745455	1	0.4	0.75	1	0.846154	55	93	10	24	70	52	1	0	0	0	0.985915	0	0	0	0	0	0	0
26312023	G	A	A	A	A	A	A	0.642857	0.666667	1	0.538462	1	1	14	27	16	26	11	39	0.5	0	0	0	0	0.818182	0	0.777778	0	0	0	0
64770272	C	G	G	G	G	G	G	1	0.5	1	0.25	0.571429	0.375	8	6	3	8	7	8	0	0	0	0	0	0.230769	0	0	0.714286	0	0	0
57146307	T	C	C	C	C	C	C	0.435897	0.4	0.351351	0.410256	0.6	0.553571	39	35	37	39	40	56	0	0	0	0	0	0	0	0	0	0	0	0
7839830	A	G	G	G	G	G	G	0.153846	0.625	1	0.666667	0.75	0.555556	13	8	5	6	4	9	0	0	0	0	0	0	0	0	0	0	0	1
85948860	C	A	A	A	A	A	A	0.75	1	1	1	0.9	1	8	7	8	18	10	10	1	0	0	0	0	0	0	0	0.9	0	0	1
69856673	G	A	A	A	A	A	A	1	0.75	1	1	1	1	2	4	2	2	2	4	0	0	0	0	0	0	0	0	0	1	1	1
78604483	A	G	G	G	G	G	G	1	1	1	1	1	1	2	3	4	2	4	5	1	0	1	1	0	0	0	0.25	0	0	0	0
37711326	C	G	G	G	G	G	G	1	1	1	1	1	1	11	3	5	3	5	3	0	0	0	1	0	0	0	0	0.25	1	0	1
31618251	A	G	G	G	G	G	G	0.416667	1	0.326531	1	1	1	60	65	49	57	65	123	0.5625	0	0	0	0	1	0.431034	0	0	0	0	0
59800228	G	C	C	C	C	C	C	0.333333	0.222222	0.666667	0.5	0.272727	0.75	9	9	6	6	11	20	0	0	0	0	0	0	0	0	0	0	0	0
93084941	C	T	T	T	T	T	T	0.394737	0.264706	1	1	1	1	38	34	54	8	3	8	0	0	0	0	0	0	0.5	0	0	0	0.416667	1
16933944	G	A	A	A	A	A	A	0.4	0.5	0.5	1	0.6	0.571429	5	6	6	9	5	14	0	0	0	0	0	0.833333	0	0	0	0	0	0
6860802	G	C	C	C	C	C	C	0.941176	1	0.533333	1	1	0.722222	17	12	15	10	11	18	1	0.2	0	0	0	0	0	0	0	0.384615	0.875	0
28037570	C	A	A	A	A	A	A	0.35	0.909091	1	1	1	0.631579	20	11	9	6	12	19	0	0	0	0	0.777778	0.444444	0	0.333333	0	0	0	0.6
28333623	T	G	G	G	G	G	G	0.982456	0.972222	0.888889	0.99187	0.906977	0.964789	57	36	9	123	129	284	0	0.790646	0	0	0	0.357542	0	0.413793	0.554264	0.857143	0	0
75473134	A	C	C	C	C	C	C	1	1	1	1	1	1	12	14	2	7	23	13	0	0	0	1	1	0	0	0	0	0.6	0	0.666667
5440697	A	C	C	C	C	C	C	0.857143	1	1	1	1	0.875	7	9	4	3	4	8	0	0	0	1	0	0	0	1	0	1	0	0
77218991	C	T	T	T	T	T	T	1	0.833333	1	1	1	1	9	6	14	3	2	10	0	0	0	0.818182	1	0	0.285714	0	0	0	0	1
31284891	T	A	A	A	A	A	A	0.714286	0.444444	1	1	1	1	14	9	9	4	3	12	0	0	0	0	0	0.833333	0	0	0	0.6	0	1
88406366	A	G	G	G	G	G	G	0.4	0.714286	0.875	0.3	1	0.590909	10	7	8	10	9	22	0	0	0	0	0	0	0	0	0.518519	0.454545	0	0.181818
65470650	C	T	T	T	T	T	T	1	0.666667	0.866667	1	0.733333	1	11	9	15	8	15	13	0.333333	0	0.230769	0.611111	0	0	0	0.7	0	0	0.666667	0
23589571	C	T	T	T	T	T	T	0.846154	1	1	0.916667	1	0.5	13	4	39	12	2	16	0	1	0.571429	0.666667	0	0	0	0	0	0	0.3	0
79824370	G	C	C	C	C	C	C	1	1	0.272727	0.8	0.4	0.25	8	7	11	5	5	8	0	0	0	0	1	0	0	0	0	0	0	0
85948907	G	C	C	C	C	C	C	0.625	0.833333	1	1	0.875	1	8	6	6	14	8	9	1	0	0	0	0	0	0	0	0.615385	0	0	1
117182752	A	G	G	G	G	G	G	0.4375	0.28	1	1	1	1	16	25	10	10	20	20	0	0	1	0	0	1	0	0	0	0	0	0
27865086	T	A	A	A	A	A	A	0.962687	0.932886	0.929412	0.930025	0.941397	0.515397	402	298	85	786	802	1234	0.343985	0.216236	0	0	0.592	0	0	0	0.559563	0.782828	0	0
117163503	T	C	C	C	C	C	C	0.416667	0.5	0.8	1	1	1	24	16	5	14	14	12	0	0	1	1	0	0	0	0	0	0	0	0
81727930	G	A	A	A	A	A	A	1	1	0.774194	1	1	1	45	22	31	18	9	19	0.5	0	0	0	0	0	0.6	0	1	0.277778	0.681818	0
29164798	T	C	C	C	C	C	C	1	1	1	1	0.714286	1	7	6	2	9	7	18	0	1	0	0	0	0	0	0	1	0	1	0
83037996	G	A	A	A	A	A	A	0.714286	1	1	1	1	1	7	4	3	2	4	2	0	0	0	0	0	0	1	0	1	0	1	0
127752919	G	A	A	A	A	A	A	1	1	0.559211	0.553191	1	1	96	64	152	47	135	205	0	0.271186	0.531915	0.57732	0.5	0	0	0	0.526316	0	0	0
16851333	G	C	C	C	C	C	C	0.7	1	1	1	1	1	10	2	8	2	8	4	0	0	0	0	0	1	0	0	0	1	0	1
110827895	T	G	G	G	G	G	G	1	1	1	1	1	1	23	26	19	23	24	24	0	0	0.285714	0.448276	0.333333	0.26087	0.894737	0	0.466667	0	0.25	0.363636
6150555	A	C	C	C	C	C	C	0.571429	0.5	1	1	0.375	1	7	4	10	7	8	5	0	0	0	1	0	0	0	0.75	0	0	0	0
89839658	G	A	A	A	A	A	A	1	0.4	1	1	1	1	7	10	3	7	9	8	0.375	0.666667	0	0	0	0	1	0	0	0.666667	0	0
6860867	T	C	C	C	C	C	C	0.833333	1	0.473684	1	1	0.714286	12	15	19	8	10	21	1	0	0	0	0	0	0	0	0	0.333333	1	0
67160244	A	C	C	C	C	C	C	1	0.333333	1	1	1	1	11	9	5	5	2	1	0	0	1	1	0	0.222222	0	0	0.428571	0	0	0
14516095	G	A	A	A	A	A	A	0.964286	0.542857	0.176471	0.62069	0.580645	0.514286	28	35	17	29	31	35	0	0	0	0	0	0.72	0	0	0	0	0	0
7841586	A	G	G	G	G	G	G	0.483871	0.655172	0.409091	0.666667	0.666667	0.69697	31	29	22	6	3	33	0	0	0	0	0	0	0.4	0	0	0	0	0.5
15861480	G	T	T	T	T	T	T	1	0.333333	0.571429	1	0.538462	1	5	9	7	11	13	18	0	0	0	0	0.727273	0.583333	0	0	0	0	0	0.454545
22532258	A	G	G	G	G	G	G	1	1	1	1	1	1	22	27	9	18	23	33	0	0.358491	0	0	0	0.985294	0.555556	0	0.425532	0	1	0
110094279	G	A	A	A	A	A	A	0.285714	1	0.727273	1	1	1	14	22	11	31	22	19	0	0.736842	0	0	1	0	0	0	0.272727	0	0	0.333333
7841595	C	A	A	A	A	A	A	0.466667	0.677419	0.380952	0.666667	0.666667	0.709677	30	31	21	6	3	31	0	0	0	0	0	0	0.3	0	0	0	0	0.6
18685461	T	G	G	G	G	G	G	1	1	1	1	0.666667	1	3	5	5	2	3	5	1	0	0	0	0	1	0	0	0	1	0	0
98003677	G	A	A	A	A	A	A	1	1	1	1	0.666667	1	4	2	2	2	3	5	0	0	0	0	0	0	1	1	0	1	0	0
78377689	A	G	G	G	G	G	G	0.5	1	1	1	1	1	6	5	8	3	3	4	0	0	0	0	0	0	0	0	1	1	0	0.833333
18654099	G	A	A	A	A	A	A	1	1	1	1	1	1	5	7	12	8	2	3	0	0.333333	1	1	0	0	0	0	0	1	0	0
110828739	G	A	A	A	A	A	A	1	1	1	1	1	1	3	8	9	3	5	10	0	0	0.5	0.75	0	0.833333	1	0	0	0	0.25	0
11183237	A	T	T	T	T	T	T	0.666667	0.75	1	0.666667	0.75	0.764706	9	8	7	6	4	17	0	0.4	0	0	0	0.333333	0	0	0	0.6	0	0.6
110998578	C	G	G	G	G	G	G	1	1	1	1	0.789474	0.875	8	10	3	3	19	8	1	0	0	0	0	0	0	0	1	0	0	1
87009017	C	T	T	T	T	T	T	0.63	0.602041	0.541353	0.432836	1	0.48062	100	98	133	67	56	129	0	0.561404	0	0	0.461538	0	0	0	0	0	0	0
8753455	C	T	T	T	T	T	T	0.444444	1	1	0.666667	0.666667	1	9	3	3	3	3	4	0	0	0	0	0.714286	0	0	0	1	0.4	0	0
97227901	G	A	A	A	A	A	A	1	0.333333	0.714286	1	0.769231	1	14	6	14	3	13	17	0.285714	0	0	0	0	0	0	1	0.875	0	0	0
22553549	G	A	A	A	A	A	A	1	1	1	1	1	1	6	2	2	4	5	2	0	0.789474	0	0	0.5	1	0	0.6	0.454545	0	0	0
67182544	G	A	A	A	A	A	A	1	0.421053	1	0.25	0.272727	1	28	19	4	12	11	18	0.272727	0.37931	0	0	0	0	0.636364	0	0	0	0	0
10894398	G	A	A	A	A	A	A	0.5	1	1	0.75	1	0.4	6	3	5	4	2	10	1	0	0	0	0	1	0	0	0	0	0	0
4439656	C	G	G	G	G	G	G	1	1	1	1	1	0.4	2	9	2	11	15	5	0	0	0	0	0	0	0	0	0	0.75	1	1
74549788	A	C	C	C	C	C	C	1	1	1	1	1	1	7	7	1	4	2	3	0	0.6	0	0	0	0	0	0.75	1	0	1	0
74519082	C	T	T	T	T	T	T	0.444444	1	0.833333	0.5	1	0.538462	9	12	6	4	16	26	0.666667	1	0	0	0	0	0	0	0	0	0	0
39013451	C	T	T	T	T	T	T	1	0.285714	0.333333	0.6	1	0.516129	19	14	24	10	16	31	0	0	0	0	0	0	0.8	0	0	0	0.285714	0
28037500	C	T	T	T	T	T	T	0.25	0.842105	1	1	1	0.5	24	19	10	12	20	30	0	0	0	0	0.578947	0.6	0	0.25	0	0	0	0.517241
18351965	C	A	A	A	A	A	A	1	0.473684	0.55	1	0.545455	0.775862	30	38	20	24	55	58	0	0.439024	0	0	0	0	0	0.535714	0	0	0	0.72549
6860790	A	G	G	G	G	G	G	0.842105	1	0.5625	1	1	0.666667	19	11	16	10	10	15	1	0.285714	0	0	0	0	0	0	0	0.391304	0.75	0
87009471	T	C	C	C	C	C	C	0.468085	0.54	0.649123	0.708333	1	0.527273	47	50	57	24	21	55	0	0.5	0	0	0.75	0	0	0	0	0	0	0
19639710	C	A	A	A	A	A	A	0.483871	1	1	1	1	1	31	20	42	13	30	49	0	0	0	0	0.322581	0.519802	0	0	0	0	1	1
52235171	T	A	A	A	A	A	A	1	0.426471	0.476923	0.692308	1	0.517241	45	68	65	26	32	29	0	0	0	0	0	0.461538	0	0.8	0	0.210526	0	0
22262224	A	G	G	G	G	G	G	0.472222	0.5	1	0.411765	0.241379	0.404255	36	16	18	34	29	47	0.388889	0	0	0	0	0	0	0	0	0	0	0
27464441	C	T	T	T	T	T	T	0.583333	0.583333	0.5	0.520833	1	1	36	36	4	48	26	39	0	0.652174	0	0	0	0	0	0.444444	0	0.451613	0	0
1585439	T	C	C	C	C	C	C	0.666667	0.454545	1	1	0.8	0.5625	9	11	5	6	5	16	0	0	0	0.4	0.333333	0.666667	0	0	0	0.444444	0	0
27601220	G	T	T	T	T	T	T	1	0.714286	1	0.884615	1	1	10	7	2	26	17	26	0.961538	1	0	0	0	1	0	0	0	0	0	0
10927771	T	C	C	C	C	C	C	1	0.647059	0.5	0.666667	0.428571	0.92	31	34	32	6	7	25	0	0.8	0.25	0.47619	0	0	0	0	0	0	0	0
3113989	C	T	T	T	T	T	T	0.404218	0.441463	0.432348	0.391304	0.465839	0.49896	569	410	643	276	322	481	0	0	0	0	0	0	0	0	0	0	0	0
16092710	G	A	A	A	A	A	A	0.529412	0.692308	0.75	0.666667	0.272727	0.756757	17	13	16	3	11	37	0	0	0	0	0	0	0.619048	0	0	0	0.416667	0
14548959	G	A	A	A	A	A	A	0.324324	0.5	0.333333	0.472527	0.4	0.6	74	64	69	91	50	110	0	0	0	0	0	0	0	0	0	0	0	0
10928023	C	G	G	G	G	G	G	1	1	1	1	1	1	19	8	7	6	8	13	0	0	0.5	0.454545	1	0	0	0	0.416667	1	0	0
27876708	T	G	G	G	G	G	G	0.2	1	1	1	1	1	10	2	4	5	2	4	0	0	0	0	0	0	0	0	1	0.571429	1	0
84376953	G	C	C	C	C	C	C	1	1	1	1	1	0.625	4	4	6	2	4	8	0	1	0	0	0	0	0	1	0	0	1	0
35750062	T	C	C	C	C	C	C	1	1	1	0.75	1	1	14	5	12	4	2	6	0	0	0	0	1	0.75	0	0	1	0.375	0	0
31863608	T	G	G	G	G	G	G	0.421053	0.285714	1	0.5	1	1	19	14	13	4	4	6	0	0.583333	0	0	0	1	0	0	0	0	0	0
113605940	C	T	T	T	T	T	T	1	0.541667	0.727273	0.913043	1	0.428571	16	24	11	23	25	7	0	0.588235	0	0	1	0	0	0	0	0	0.4	0
77239071	C	T	T	T	T	T	T	1	0.444444	1	1	1	1	17	18	13	14	17	17	0	0	0	0	0.411765	0.422222	0.315789	0	0.277778	0	0.4	1
43624241	C	G	G	G	G	G	G	1	1	1	1	1	0.615385	4	6	2	7	6	13	1	0	0	1	0	0	0	0	0	0	0	1
42267628	T	C	C	C	C	C	C	0.625	0.777778	0.555556	0.666667	0.5	0.375	16	9	9	3	4	8	0	0	0	0	0	0	0	0	0.285714	0	0	0.6
8534203	T	C	C	C	C	C	C	0.5	0.4	0.571429	0.428571	1	0.333333	6	5	7	7	2	9	0.333333	0	0	0	0	0.285714	0	0	0	0	0	0
61206657	C	T	T	T	T	T	T	0.526316	0.5	0.8	0.666667	0.5	1	19	20	10	24	14	29	0	0	0.272727	0.511628	0.344828	0	0	0	0	0	0.25	0
93653628	A	G	G	G	G	G	G	0.888889	0.8	0.142857	0.5	0.428571	0.75	9	5	14	6	7	4	0	0	0	0.333333	0	0.571429	0	0	0	0	0	0
58010885	C	A	A	A	A	A	A	0.421053	0.285714	0.75	1	1	0.722222	19	14	4	4	12	18	0	0	0.368421	0.571429	0	0	0	0.636364	0	0	0	0
22413475	A	G	G	G	G	G	G	1	0.818182	0.777778	0.8	1	0.789474	7	11	18	5	2	19	0	0	0	0	0	0	1	0	0	0.833333	0.75	0
38830514	C	T	T	T	T,A	T	T	1	0.428571	0.833333	1	1	1	4	7	6	8	2	9	1	0.375	0	0	0	1	0	0	0	0	0.285714	0
11954963	C	G	G	G	G	G	G	1	1	1	1	1	1	2	8	3	2	2	3	0	1	0	0	0	1	0	0	0	0.4	1	0
18685498	A	G	G	G	G	G	G	1	1	1	1	0.6	1	3	4	5	2	5	2	1	0	0	0	0	1	0	0	0	1	0	0
65129416	G	T	T	T	T	T	T	0.52381	0.136364	1	0.605263	1	0.430556	21	22	23	38	36	72	0	0	0.368421	0.230769	0	0.5	0	0	0	0	0	0
10273146	A	G	G	G	G	G,T	G	1	0.666667	0.5	1	1	0.428571	2	3	4	2	7	7	0	0	1	0	0	0	0	0	0	1	0	0
4044270	C	T	T	T	T	T	T	1	1	1	0.5	1	1	8	4	2	4	2	6	0.666667	0	0	0	1	0	0	0.571429	0	0	0.666667	0
8736089	C	T	T	T	T	T	T	0.363636	0.666667	0.222222	0.5625	0.73913	0.977273	11	21	18	32	23	44	0	0	0	0	0	0	0	0	0.423077	0.513514	0	0
36947198	C	T	T	T	T	T	T	0.833333	0.444444	1	0.2	0.6	1	6	9	2	10	5	7	0.533333	0	0	0	0.285714	0.666667	0	0	0	0	0	0
35492592	A	G	G	G	G	G	G	0.428571	0.857143	0.625	1	1	0.846154	21	7	8	6	6	13	0	0	0	0	0	0	0.666667	0	0	0.5	1	0
117183269	A	T	T	T	T	T	T	0.455556	0.46875	0.473684	1	1	0.977273	90	64	38	16	11	44	0	0	0.285714	0	0	1	0	0.5	0	0	0	0
22413477	A	G	G	G	G	G	G	1	1	1	0.8	1	0.789474	7	11	18	5	2	19	0	0	0	0	0	0	1	0	0	1	1	0
45740928	T	C	C	C	C	C	C	0.611111	0.483871	0.2	0.28125	0.458333	0.551724	18	31	10	32	24	29	0	0	0	0	0	0	0	0	0	0	0	0
33199353	A	G	G	G	G	G	G	1	1	1	1	0.666667	0.833333	2	2	5	2	3	12	0	0.4	0	0.714286	0	1	0	0	0	0	0	0.8
28426069	G	A	A	A	A	A	A	1	1	1	1	1	1	137	90	26	122	184	150	0.807692	0.971429	0	0	0	0	0	0	0.636364	1	0	0
41372147	A	G	G	G	G	G	G	0.666667	0.666667	1	1	1	1	3	6	11	6	3	4	0	0	0	1	0	0	0	0	0	0.75	1	0
33396571	G	A	A	A	A	A	A	1	1	1	1	0.25	1	3	3	2	2	8	3	0	1	0	0	0	0.666667	0	1	0	0	0	0
19278109	C	A	A	A	A	A	A	0.833333	1	1	1	1	1	6	9	10	4	10	9	0	1	0	1	0	0	0.75	0	0	0.5	0	0
41829575	C	T	T	T	T	T	T	0.55	0.545455	1	1	0.388889	1	20	11	10	13	18	38	0	0	0.5	0.533333	0	0.512821	0	0.357143	0	0	0	0
39171158	G	C	C	C	C	C	C	0.8	0.333333	0.485714	0.6	0.571429	0.6875	15	12	35	10	7	16	0.4	0	0	0	0	0	0	0.5	0	0	0	0
6860828	A	C	C	C	C	C	C	0.882353	1	0.466667	1	1	0.631579	17	14	15	7	12	19	1	0.222222	0	0	0	0	0	0	0	0.347826	0.833333	0
83479476	A	T	T	T	T	T	T	0.846154	0.666667	1	0.714286	0.75	1	13	3	2	7	24	2	0.4	0	0	0	0	0	0	1	1	0	0	0
79395232	A	T	T	T	T	T	T	1	1	0.571429	1	1	1	10	7	7	4	4	3	0	0	0	0	0	1	0	0	1	0	1	0
21796231	G	A	A	A	A	A	A	1	1	1	1	1	1	5	2	3	5	11	6	0.928571	0	0.666667	0	0.833333	0	0	0	1	0	0	0
119199081	G	A	A	A	A	A	A	1	1	0.4	1	1	0.666667	6	4	10	2	2	6	0	0	0	0	0	0	1	0	0	0.5	1	0
120045333	C	T	T	T	T	T	T	0.15748	1	1	0.973684	0.928571	1	127	34	14	76	28	66	0	0	0.171171	0	0	0.211538	0	0.168831	0	0	1	0.942857
1696980	A	G	G	G	G	G	G	0.636364	1	1	1	1	1	11	7	4	6	7	8	1	0	0.36	0	0.461538	1	0	0.25	0	0	0	0
45671021	T	C	C	C	C	C	C	0.5	1	0.555556	1	1	1	8	8	9	13	4	8	0.333333	0	0	0	0.2	0	0	0.294118	0.5	0.5	0.666667	0
77241184	G	A	A	A	A	A	A	1	0.627907	1	1	1	1	32	43	26	19	27	31	0	0	0	0	0.259259	0.609756	0.363636	0	0.363636	0	0.470588	1
57246786	A	G	G	G	G	C	G	0.333333	0.625	0.846154	0.6	1	0.727273	6	8	13	5	2	11	0	0	0	0.571429	0	0	0	0	0	0	1	0
15856181	C	T	T	T	T	T	T	1	0.5	1	1	0.526316	1	6	6	2	12	19	8	0	0	0	0	0	0.466667	0	0	0	0	1	1
90248034	A	T	T	T	T	T	T	0.875	1	0.5	0.461538	0.461538	0.909091	16	5	8	13	13	11	0	0.53125	0.442623	0.232877	0	0.444444	0	0	0	0	0	0
57538111	T	A	A	A	A	A	A	1	1	1	1	1	0.555556	3	5	2	2	2	9	1	0	1	0	0	0	0	0	0	0	1	0
15469639	C	A	A	A	A	A	A	1	1	1	1	0.222222	1	5	6	6	7	9	10	0.666667	0	0	0	1	0	0	0	0	0	1	0
1577741	G	T	T	T	T	T	T	0.72973	0.823529	0.647059	0.590164	0.351351	1	37	17	17	61	37	54	0	0	0	0	0	0	0.5	0.666667	0.421053	0	0	0
84498052	T	G	G	G	G	G	G	1	1	1	1	1	0.7	3	3	6	6	5	10	0	0	0	0	0	0	0	1	0	0.4	0.75	1
35655886	C	A	A	A	A	A	A	0.5	1	0.583333	1	0.666667	0.3	8	11	12	4	3	10	0	0.5	0.333333	0.666667	0	0	0	0	0	0	0	0
57743325	G	A	A	A	A	A	A	0.8	1	1	1	1	0.75	10	14	6	8	4	8	1	1	0	0	0	0	0	0	0	0	1	0
1466733	C	T	A	A	A	A	A	0.411765	0.2	0.368421	0.548387	0.447368	1	2	15	19	31	38	46	0	0	0	0	0	0	0	0.428571	0	0	0	0
61442906	C	T	T	T	T	T	T	1	1	1	1	1	1	17	4	27	5	12	19	0	0	1	1	0	0	0	0	1	0.454545	0	0
76853178	A	G	G	G	G	G	G	1	1	1	1	0.5	1	14	6	4	10	4	62	0	0	0	0.5	0.4	0.363636	0	0	0.692308	0	0	1
20697234	A	G	G	G	G	G	G	0.818182	0.92	1	0.636364	0.769231	1	11	25	4	11	13	46	0.5	0	0	0	0	0	0	0	0.5	0.6	0	1
51369534	C	T	T	T	T	T	T	0.272727	0.45	1	0.37037	1	0.393939	22	20	9	27	25	33	0.511111	0	0	0	0	0	0	0	0	0.433333	0	0
84495901	C	T	T	T	T	T	T	1	1	1	1	1	0.875	4	6	8	2	5	8	1	0.666667	1	0	0	0	0.666667	0	0	0	0	0
62393461	C	T	T	T	T	T	T	1	1	1	1	1	0.833333	3	4	2	17	9	6	0	0	0	0	0	0.4375	0	1	0.857143	1	0	0
65913338	A	G	G	G	G	G	G	0.5	0.363636	0.666667	0.571429	1	0.75	12	11	6	14	11	28	0	0.3	0	0	0	0	0.580645	0	0	0	0.4375	0
90249538	G	A	A	A	A	A	A	1	1	1	1	0.909091	1	8	9	6	7	22	7	0	1	0.809524	0.851852	0	0.714286	0	0	0	0	0	0
117177621	A	G	G	G	G	G	G	0.580645	0.631579	0.483333	1	1	1	31	19	60	6	7	12	0	0	0.615385	0.214286	0.333333	1	0	0	0	0	0	0
105271232	A	G	G	G	G	G	G	1	0.666667	1	0.5	1	1	2	3	2	4	5	3	0	0	0	0.636364	0	0	0	0	0	1	0	1
140190586	G	A	A	A	A	A	A	1	1	0.5	1	1	1	4	3	4	7	7	4	0	0	0	0	0.722222	1	0	0	0.75	0.5	0	0
14235943	T	C	C	C	C	C	C	1	1	1	1	0.666667	0.857143	4	2	4	2	3	7	0	0	0	0	1	0	0	0	0	1	1	0
117171390	A	G	G	G	G	G	G	0.612903	0.833333	0.40625	1	1	1	31	6	32	6	5	22	0	0	0	1	1	0.333333	0	0	0	0	0	0
110827651	T	C	C	C	C	C	C	1	1	1	1	1	1	7	17	13	17	6	24	0	0	0.538462	0.391304	0	0.375	1	0	0.428571	0	0.5	0.25
85948831	A	C	C	C	C	C	C	0.666667	1	0.75	1	0.9	1	6	8	4	17	10	2	0.916667	0	0	0	0	0	0	0	0.888889	0	0	1
113696184	G	A	A	A	A	A	A	0.875	1	1	0.8	0.357143	0.230769	16	4	4	15	14	13	0	0	0.454545	0	0	0	0	0	0.47619	0.6	0	0.222222
75167197	A	G	G	G	G	G	G	1	1	0.5	1	1	1	30	22	36	10	2	22	0.7	0	0	0	1	0.222222	0	0	0	0.615385	0.454545	0
50631955	A	G	G	G	G	G	G	1	0.571429	1	1	1	1	8	7	2	2	5	26	0	0	0	0	0	1	0	0	0	0.818182	0.25	1
84371397	C	T	T	T	T	T	T	1	1	1	1	1	0.333333	3	6	5	2	5	6	0	0	1	0	0	1	0	0	0.833333	0	0	0
74609846	G	A	A	A	A	A	A	1	1	1	1	1	0.5	6	2	4	2	2	6	0	1	0	0	0	0	0	0	1	0	1	0
74184077	C	T	T	T	T	T	T	1	1	1	1	1	0.5	3	4	2	6	4	10	0	0	0	0	0	0	0	0	1	1	0	1
62508797	A	G	G	G	G	G	G	1	1	1	1	1	1	4	10	6	2	2	2	0	1	0	0	0	0	1	0	0	1	0.5	0
58918501	C	T	T	T	T	T	T	0.5	1	1	1	1	1	4	4	4	2	5	3	1	0	1	0	0	0	0	0	0	1	0	0
9784392	G	A	A	A	A	A	A	0.941176	1	0.5	0.352941	1	1	17	18	20	17	6	19	0.357143	0	0	0	0	1	0	0.5	0	0	0.4375	0
84184280	C	T	T	T	T	T	T	0.416667	1	0.652174	1	1	0.428571	12	6	23	5	6	7	0	0	0	1	0	0	0	0	1	0	0	0
14708038	G	T	T	T	T	T	T	1	0.25	0.761905	0.516129	0.558824	1	35	12	21	31	34	30	0	0	0	0	0	0	0	0.409091	0	0.461538	0.314286	0.405405
30066132	T	C	C	C	C	C	C	1	1	0.333333	1	1	1	5	3	6	2	2	3	0	0	0	0	0	0.571429	1	0	0.666667	0.6	0	0
7762752	A	T	T	T	T	T	T	0.564103	0.55	0.389831	0.666667	0.2	0.52381	78	20	59	18	10	21	0	0	0	0	0	0	0	0	0	0.4	0	0
89378514	G	A	A	A	A	A	A	0.636364	0.592593	0.522727	1	1	0.409091	33	27	44	34	26	44	0	0	0	0	0	0	0.636364	0	0	0	0.666667	0.363636
14736004	T	C	C	C	C	C	C	0.37594	0.994872	1	1	1	1	133	390	55	589	666	361	0	0.486692	0	0	0	0	0	0	1	0.990698	0	0.400709
9783866	G	C	C	C	C	C	C	1	1	0.625	0.571429	1	1	15	17	8	14	14	24	0.461538	0	0	0	0	1	0	0.384615	0	0.222222	0.636364	0
10888513	T	C	C	C	C	C	C	1	0.32	0.470588	1	0.714286	1	5	25	17	2	14	3	0	0	0	0	0	0	0	0	0.35	0	1	0.666667
76119721	A	G	G	G	G	G	G	0.571429	1	1	1	1	0.44	14	17	6	12	16	25	0	1	0.285714	0.380952	0	0	0.857143	0	0	0	0	0
154365116	T	C	C	C	C	C	C	0.411765	0.928571	1	1	0.490196	0.878788	17	14	2	9	51	33	0	0	0	0	0	0	1	0	0.529412	0.692308	0	0
6860841	T	A	A	A	A	A	A	0.875	1	0.384615	1	1	0.611111	16	13	13	6	10	18	1	0.222222	0	0	0	0	0	0	0	0.333333	0.833333	0
75501384	A	G	G	G	G	G	G	0.636364	1	1	1	1	0.777778	11	4	12	7	2	9	0	0	0.333333	1	0	0.6	0	0	0	0	1	0
28036803	T	A	A	A,C	A	A	A	0.5	0.5	1	1	1	0.5625	8	4	8	8	8	16	0	0	0	0	0.517241	0.594595	0	0.6	0	0	0	0.375
96579724	A	C	C	C	C	C	C	1	1	1	1	1	1	14	14	2	12	14	5	0	1	0	0.4	1	0	0	0.5	0	0.625	0	0
36939144	C	T	T	T	T	T	T	1	0.4	0.818182	0.529412	0.461538	1	27	20	11	17	13	16	0.653846	0	0	0	0.428571	0.653846	0	0	0	0	0	0
18351803	A	T	T	T	T	T	T	1	0.571429	0.307692	1	0.526316	0.611111	15	7	13	8	19	18	0	0	0	0	0	0	0	0.75	0	0	0	0.8
48887129	G	A	A	A	A	A	A	1	1	1	1	1	1	10	9	5	22	10	15	0	0	0.538462	0.193548	1	0	0	0.285714	0.517241	0	0	1
113020588	C	T	T	T	T	T	T	0.714286	1	1	1	1	1	7	3	8	2	2	4	0	0	0.5	0	0	0	0	0	1	0.75	0	1
73694901	C	G	G	G	G	G	G	0.666667	1	1	0.583333	1	0.5	6	9	7	12	9	10	0	0.142857	0	0.333333	0	0.545455	0	0	0.666667	0	0	0.6
94637098	T	A	A	A	A	A	A	0.291667	0.625	0.333333	1	0.5	0.5	24	8	6	2	4	8	0	0	0	0.235294	0	0	0	0	0	0	0.555556	0
53844173	C	G	G	G	G	G	G	1	1	0.545455	0.588235	1	1	26	16	11	17	28	26	0	0	0	0	0.42623	0	0	0.695652	0.553191	0	0	1
84532075	C	A	A	A	A	A	A	1	0.625	1	0.5	0.333333	1	4	8	2	4	6	3	0	1	0	1	0	0	0	0	0	0	0	0
75600733	C	T	T	T	T	T	T	1	1	0.382353	1	1	1	57	33	34	72	66	34	0.993902	0	0.931034	1	0	0	0	0	0	0	0	0
74071199	C	A	A	A	A	A	A	0.537367	1	1	1	1	1	281	336	186	221	286	442	0	0.498084	0.587393	0.467787	0	0.530179	0	0	0.484716	0	0.51227	0
7842211	C	G	G	G	G	G	G	0.444444	0.538462	0.5	0.428571	1	0.545455	9	13	10	7	3	11	0	0	0	0	0	0	0	0	0	0	0	1
86024561	C	T	T	T	T	T	T	0.568627	0.658537	0.916667	0.4	0.55	0.511111	51	41	36	30	40	45	0	0	0	0	0.571429	0.580645	0	0	0	0	0	0
28808277	C	T	T	T	T	T	T	1	0.5	1	0.666667	1	1	4	4	2	6	2	3	0	0	0	0	0	0	0	0	0.714286	1	0.333333	0.666667
20590141	A	G	G	G	G	G	G	1	0.507692	1	0.392857	1	0.534884	87	65	111	84	70	129	0	0	0	0	0	0	0	0.45122	0	0.634146	0.9	0
106903059	A	G	G	G	G	G	G	0.882353	0.714286	1	0.533333	0.5	0.666667	17	28	8	15	10	18	0	0.324324	0	0	0.722222	0.416667	0	0	0	0	0	0.384615
22262249	C	T	T	T	T	T	T	0.477273	0.344828	0.848485	0.526316	0.292683	0.333333	44	29	33	38	41	45	0.375	0	0	0	0	0	0	0	0	0	0	0
28470587	G	C	C	C	C	C	C	0.545455	0.6	1	0.615385	0.805556	0.517857	11	20	5	26	36	56	0.4	0	0	0	0.666667	0	0	0	0	0.571429	0	0
51089842	C	G	G	G	G	G	G	0.342105	0.452381	1	0.618182	1	0.384615	38	42	12	55	37	13	0.441176	0	0	0	0	0	0	0	0	0.916667	0	0
65826727	A	G	G	G	G	G	G	0.8	0.357143	0.625	1	0.615385	0.714286	15	14	16	17	26	42	0	0	0	0	0	0	0.777778	0	0	0	0.533333	0.363636
1762216	T	C	A	C	C	C	C	1	0.291667	0.857143	0.277778	0.6	1	16	24	7	18	10	16	0.301887	0.266667	0	0.307692	0	0	0	0	0	0.714286	0	0
21085287	G	A	A	A	A	A	A	0.55814	1	0.408451	0.439716	0.577586	0.450704	172	165	71	141	116	142	1	0	0	0	0	0	0	0	0	0	0	0
22533311	T	C	C	C	C	C	C	1	1	1	1	1	1	2	14	3	20	15	41	0	0.588235	0	0.129032	0	1	0.4	0	0.448276	0	1	0
40806547	G	C	C	C	C	C	C	1	1	1	1	1	0.428571	4	3	6	4	2	7	0	1	1	0	0	0	0	0	1	0	0	0
89838039	A	G	G	G	G	G	G	1	0.5	1	1	1	1	3	8	22	4	6	13	0.785714	0	0	0	0	0	1	0	0	1	0	0.285714
15147007	A	G	G	G	G	G	G	0.538462	1	1	0.4	0.5	0.555556	13	7	2	10	4	9	0	0	0	0	0	0	0.375	0.333333	0	0.857143	0	0
59683383	T	C	C	C	C	C	C	0.393548	0.565217	0.3	0.391304	0.357143	0.419643	155	92	120	46	42	112	0	0	0	0	0	0	0	0	0	0	0	0
91991339	C	T	T	T	T	T	T	1	1	1	1	1	1	108	54	33	33	16	38	0	0.633333	0	0	0.583333	1	0	0.647059	0	0.444444	0	0.266667
24192104	C	T	T	T	T	T	T	1	1	0.222222	1	0.666667	1	2	6	9	2	6	10	0	0	0	0	0	0.75	0	0	1	0	0.714286	0
15861485	T	C	C	C	C	C	C	1	0.333333	0.4	1	0.5	1	5	9	5	12	14	18	0	0	0	0	0.727273	0.583333	0	0	0	0	0	0.5
97249410	T	A	A	A	A	A	A	0.55814	0.540541	0.32	1	0.607143	0.481481	43	37	25	21	28	27	0.582524	0	0	0	0	0	0	0	0.506667	0	0	0
19278599	T	C	C,A	C	C	C	C	0.857143	1	1	1	1	1	7	6	9	4	4	9	0	0	1	0	1	0	0	0	0	0.444444	0	1
75473715	A	T	T	T	T	T	T	0.8125	1	1	1	1	0.2	16	10	14	2	2	10	0	0	0	0	1	0.714286	0.285714	0	0	0	0.6	0
20531113	T	C	C	C	C	C	C	1	1	1	1	1	1	10	31	15	25	18	18	1	0.444444	0	0	0	0.6	1	0	0	0.545455	0	0
27684604	C	T	T	T	T	T	T	0.4375	0.416667	0.777778	0.653846	0.589744	0.516129	16	24	36	26	39	62	0	0	0	0	0	0	0	0.521739	0	0.468085	0	0
62407357	C	T	T,G	T,G	T	T	T	0.375	1	1	1	1	0.545455	8	10	5	5	4	11	0	0.652174	0	0	0	0	0	0.666667	0.2	1	0	0
11195689	C	T	T	T	T	T	T	1	1	1	0.769231	0.631579	1	7	7	4	13	19	19	0	0	0	0	1	0	1	0	0	0	1	0
86681236	A	T	T	T	T	T	T	1	1	1	0.4	1	1	3	2	6	5	4	6	0	1	1	1	0	0	0	0	0	0	0	0
116753917	T	C	C	C	C	C	C	1	0.4	1	1	1	1	2	5	4	4	4	10	0	0	0	1	0	0	0	0	1	1	0	0
18839814	G	A	A	A	A	A	A	1	0.5	1	1	1	0.8	14	6	2	7	6	5	0	0	0	0	0	0.6	0	0	0.4	0.4	0.5	1
43306974	A	G	G	G	G	G	G	1	1	1	1	1	1	7	9	13	3	2	15	1	1	0	0	0	0	0	0	0	1	0.6	0
28353558	T	C	C	C	C	C	C	0.5	0.363636	1	0.555556	1	1	10	11	3	18	12	11	0	0.9375	0	0	0.583333	0	0	0.5	0	0	0	0
48787374	A	G	G	G	G	G	G	0.642857	1	1	1	1	0.428571	14	4	5	2	3	7	0	0	0.625	0.25	0	0	0	0	1	0	0	0.8
6860851	G	A	A	A	A	A	A	0.833333	1	0.545455	1	1	0.705882	18	13	11	6	9	17	1	0	0	0.357143	0	0	0	0	0	0.333333	1	0
118132888	T	C	C	C,A	C	C	C	1	1	1	1	0.6	0.181818	2	3	6	3	5	11	0.888889	0	0	0	0	0	0.75	0	0.5	0	0.25	0
77240520	C	G	G	G	G	G	G	1	0.355932	1	1	1	1	82	59	116	28	21	44	0	0	0	0	0.490909	0.418182	0.3125	0	0.411765	0	0.333333	1
22532975	A	G	G	G	G	G	G	1	1	1	1	1	1	4	13	3	8	19	18	0	0.512821	0	0	0	1	0	0.7	0.4	0	1	0
14393840	G	A	A	A	A	A	A	1	0.55	1	1	0.6	0.235294	15	20	6	18	15	17	0	1	0	0	1	0	0	0	0	0	0	0
103511417	C	T	T	T	T	T	T	1	0.882353	0.5	0.529412	0.75	0.692308	32	17	32	17	4	39	0	0	0	0	0	1	0	0	0.272727	0.697674	0	0
57331806	G	A	A	A	A	A	A	0.56	1	1	1	0.441176	0.327273	25	28	14	42	34	55	0	0	0.688889	0.573529	0	0.685185	0	0	0	0	0	0
86033546	A	G	G	G	G	G	G	0.571429	0.333333	1	0.714286	0.583333	0.611111	7	9	6	14	12	18	0	0	0	0	0.75	0.684211	0	0	0	0	0	0
97227927	T	C	C	C	C	C	C	1	0.285714	0.833333	1	0.8	1	14	7	12	4	15	17	0	0	0.666667	0	0	0	0	1	0.875	0	0	0
75495092	C	T	T	T	T	T	T	0.615385	1	1	1	1	0.727273	13	30	19	7	3	11	0	0	0.666667	1	0	0.8	0	0	0	0	0.5	0
77240821	C	T	T	T	T	T	T	1	0.4375	1	1	1	1	101	96	101	51	27	34	0	0	0	0	0.55	0.480519	0.227642	0	0.431818	0	0.372881	1
97227091	C	T	T	T	T	T	T	1	0.25	0.6	0.857143	0.666667	1	4	12	5	7	15	19	0	0	0	1	0	0	0	1	0	0	0	0
8735742	G	A	A	A	A	A	A	0.35	0.56	0.209302	0.541667	0.36	1	40	50	43	24	25	76	0	0	0	0	0	0	0	0	0.303571	0.347222	0	0
74181297	A	G	G	G	G	G	G	1	0.571429	1	1	1	1	7	7	2	12	7	21	0.586207	0	0	0	0.357143	0	0	0.6	1	0	0	0.666667
20577077	T	C	C	C	C	C	C	1	0.2	1	0.75	0.285714	0.8	5	10	5	4	7	5	1	0	0	0.285714	0	0	0.388889	0	0	0	0	0
27600687	T	G	G	G	G	G	G	0.75	1	1	0.888889	0.875	1	4	4	4	9	8	13	0.857143	1	0	0	0	1	0	0	0	0.3	0	0
60849620	C	A	A	A	A	A	A	1	0.533333	0.48	0.421687	0.99115	0.992481	128	120	25	166	113	133	0.416244	0.509804	0	0	0.564286	0	0	0.572115	0	0	0	0
64892808	C	T	T	T	T	T	T	0.578125	0.372549	1	0.736842	0.454545	0.452632	64	51	24	19	22	95	0	0.45098	0	0	0.541667	0	0	0	0	0	0	0.25
117177962	G	A	A	A	A	A	A	0.388889	0.388889	0.657143	1	1	1	18	18	35	16	16	12	0	0	0.333333	0	0.75	1	0	0	0	0	0	0
27155606	G	A	A	A	A	A	A	0.777778	0.5	0.5	0.708333	0.904762	0.592593	18	12	10	24	21	54	0.197802	0.16129	0	0	0	0.234694	0	0	0.27027	0.769231	0	0
32897352	G	T	T	T	T	A	T	0.435976	0.460123	0.453039	0.44	0.517857	0.433673	328	163	181	100	112	196	0	0	0	0	0	0.391608	0	0	0	0	0	0
45671766	A	G	G	G	G	G	G	0.2	1	0.333333	1	1	1	15	8	6	6	3	9	0.571429	0	0	0	0.153846	1	0	0.2	0.263158	0	0	0
16835255	A	G	G	G	G	G	G	0.544444	0.326923	1	0.478261	0.455882	0.506849	90	52	55	46	68	73	0	0	0	0	0	0	0	0	0.52381	0	0	0.444444
99364561	G	T	T	T	T	T	T	0.5	0.833333	1	0.909091	0.666667	1	6	6	3	11	3	3	0	1	0	0	0	0	0	0	0	0.571429	0	1
36026513	G	A	A	A	A	A	A	1	1	0.547619	0.666667	0.580645	0.3625	90	49	42	39	31	80	0.417323	0	0	0	0	0	0	0	0.479452	0.536585	0.390244	0
8962649	T	C	C	C	C	C	C	1	1	1	1	0.4	1	5	10	2	2	5	4	0	0	0	1	0	0	0	0	0.666667	0.4	0	1
23344746	C	T	T	T	T	T	T	1	1	1	1	0.5	0.833333	2	2	3	9	6	12	0	1	0	1	1	0	0	0	0	0	0	0
41414998	A	T	T	T	T	T	T	1	1	1	1	0.333333	1	4	3	3	3	6	4	1	0	1	1	0	0	0	0	0	0	0	0
28714376	C	T	T	T	T	T	T	0.833333	1	0.928571	1	1	1	24	13	14	11	36	79	0	1	0	0	0.428571	1	0	0	0	1	0	0
864354	G	A	A	A	A	A	A	1	1	1	1	1	1	2	5	3	3	5	2	0	0	0	1	1	0	0	0	0	0	0.666667	1
15047350	A	C	C	C	C	C	C	0.888889	1	1	1	1	1	9	2	2	2	2	6	0	0	0	1	0	0	0.555556	0	0	1	1	0
49522367	C	A	A	A	A	A	A	1	1	1	1	1	1	6	4	6	11	3	11	1	1	1	0	0	0	0	0	0	0.666667	0	0
117177504	A	G	G	G	G	G	G	0.466667	0.431373	0.6	1	1	1	60	51	80	19	24	43	0	0	0.363636	0.777778	0.583333	0	0	0.444444	0	0	0	0
35977170	A	G	G	G	G	G	G	0.5	0.428571	1	0.2	0.2	0.5	10	7	2	10	10	4	0	0	0	0.5	0	0	0	0	0	0	0	0
19867745	G	T	T	T	T	T	T	0.571429	1	0.714286	0.6	1	1	7	23	7	25	20	16	0	0	0	0	0	0.5	0	0.45	0.774194	0	0.833333	0
127762984	G	A	A	A	A	A	A	1	1	0.7	0.5	1	1	8	18	10	6	27	30	0	0	0	0	0.75	0.315789	0	0	0.666667	0.4	0.75	0
127756206	A	T	T	T	T	T	T	0.998693	0.995935	0.521797	0.449275	1	1	765	492	757	276	464	696	0	0.529851	0.535613	0.595833	0.480226	0	0	0	0.508403	0	0	0
68012633	T	C,A	C	C	C	C	C	1	0.714286	0.6	1	1	1	3	7	5	3	3	3	1	0	0	0	0	0	0	1	0	0	0	1
25958595	C	T	T	T	T	T	T	1	0.307692	1	1	1	1	2	13	2	5	3	4	0	0	0	0	0	0	1	1	0	1	0	0
25958597	C	T	T	T	T	T	T	1	0.307692	1	1	1	1	2	13	2	5	2	4	0	0	0	0	0	0	1	1	0	1	0	0
29241153	G	A	A	A	A	A	A	0.5	0.2	0.352941	0.181818	0.571429	0.5	6	10	17	11	7	8	0	0	0	0	0	0	0	0	0	0	0	0
15686136	T	C	C	C	C	C	C	1	1	0.411765	0.538462	0.703704	1	37	34	17	26	27	38	0	0	0.5	0.5	0.777778	0	0	0.571429	0	0	0	0
45671674	G	A	A	A	A	A	A	0.3	1	0.285714	1	1	1	10	7	7	8	10	3	0	0	0	0	0	1	0	0.6	0.35	0	0.333333	0
103511480	C	T	T	T	T	T	T	1	1	0.434783	0.333333	0.714286	0.5	23	11	23	12	7	20	0	0	0	0	0	1	0	0	0	0.681818	0	0
27519876	C	G	G	G	G	G	G	1	0.5	1	0.8	1	1	5	4	7	5	2	2	0	0	1	1	0	0	0	0	0	0	1	0
94637144	T	G	G	G	G	G	G	0.571429	1	0.625	1	1	1	21	17	8	1	2	8	0	0.5	0.4	0.333333	1	0	0	0	0	0	0.666667	0
134386671	T	A	A	A	A	A	A	0.470588	0.2	1	0.875	1	0.75	17	10	11	8	3	4	0	0	0	0	0	0	0	0	1	0	0	1
3114228	G	C	C	C	C	C	C	0.457481	0.456939	0.441099	0.446735	0.500942	0.508996	2199	1823	1893	1164	1593	2112	0	0	0	0	0	0.519764	0	0	0	0	0	0
93193396	A	G	G	G,T	G	G	G	1	0.692308	1	1	1	1	2	13	10	4	3	7	0	0.4	0	0	1	0	1	0	0	0	1	0
12818367	G	A	A	A	A	A	A	0.666667	0.166667	0.7	0.333333	0.5	0.3	9	12	10	6	8	10	0	0	0	0	0	0	0	0	0	0.375	0	0
22541828	A	G	G	G	G	G	G	1	1	1	1	1	1	6	7	4	12	9	16	0	0.55	0	0	0	1	0.285714	0.6	0.272727	0	1	0
18352333	G	A	A	A	A	A	A	1	0.357143	0.818182	1	0.6	0.5	16	14	11	8	25	14	0	0.571429	0	0	0	0	0	0.714286	0	0	0	0.7
75600762	G	T	T	T	T	T	T	1	1	0.375	1	1	1	66	41	32	106	81	37	1	0	0.942857	1	0	0	0	0	0.142857	0	0	0
98216321	A	G	G	G	G	G	G	1	1	0.285714	1	1	1	11	7	7	6	3	3	0	1	0	0	0	0	0	0	1	1	0	0
5440473	A	G	G	G	G	G	G	1	1	1	1	1	1	7	5	17	15	7	6	0.714286	1	0	1	0	0	0	0	0	0	1	0
34832391	A	G	G	G	G	G	G	1	0.818182	0.8	0.666667	1	1	12	11	5	3	5	2	0	1	0	0	0	1	0	0	0	0	1	0
77240432	T	C	C	C	C	C	C	1	0.311111	1	1	1	1	74	45	102	19	14	33	0	0	0	0	0.368421	0.462264	0.39	0	0.444444	0	0.363636	1
144578946	C	T	T	T	T	T	T	0.444444	1	1	0.722222	0.666667	1	18	16	2	18	12	4	0.2	0	1	0.5	0	0.263158	0	0.588235	0	0	0	0
32469706	T	G	G	G	G	G	G	0.763889	0.825688	0.807018	0.725806	0.578125	0.689441	72	109	57	62	64	161	0	0	0	0	0	0.242424	0	0.648649	0	0.704918	0	0.513514
34915836	A	C	C	C	C	C	C	1	1	1	0.666667	1	0.625	8	6	6	12	8	8	0.666667	0	0	0	0	0	0.56	0	0.285714	0.5	0	1
22531927	C	T	T	T	T	T	T	1	1	1	1	1	1	13	24	10	28	28	38	0	0.261905	0	0	0	1	0.357143	0.454545	0.473684	0.173913	1	0
102880647	C	T	T	T	T	T	T	0.423684	0.432367	0.993952	0.504212	0.495396	0.471279	380	414	992	831	1086	1619	0	0	0	0	0.489982	0	0	0.552826	0	0	0	0
89305202	A	C	C	C	C	C	C	0.4	0.571429	1	1	0.5	1	5	7	15	10	8	7	0.3125	0	0	0	1	0.384615	0	0	0.5	0	0	0
55046007	C	G	G	G	G	G	G	1	0.416667	1	1	1	0.571429	2	12	4	7	3	14	0	0.4	0	0	1	0	0	0	0.416667	0.4	0.5	0
104340299	T	G	G	G	G	G	G	0.5	0.592593	1	1	1	1	28	27	13	40	34	36	0.666667	0	0	0	0	0	1	0	0.766667	0	0.388889	0
96828	G	C	C	C	C	C	C	0.8125	1	1	1	1	0.565217	16	18	2	7	13	23	0	0	0	0	0	1	0.625	0	0.736842	0	0.285714	0.461538
100329341	T	C	C	C	C	C	C	1	0.6	1	0.666667	1	1	6	5	2	3	7	5	1	1	0	0	0	0	0	0	0	0	0	1
30304916	T	G	G	G	G	G	G	1	1	1	1	0.666667	0.666667	2	5	3	6	6	3	0	0	0.666667	0	1	1	0	0	0	0.4	0	0
32767848	T	C	C	C	C	C	C	1	1	1	1	1	1	2	2	4	2	6	13	0	0.4	0	0.333333	1	1	0	0	0	0	0	1
126948368	C	G	G	G	G	G	G	1	1	1	0.333333	0.428571	1	3	6	9	6	7	3	1	0	0	0	0	0	0	0	0.5	0	1	0
22533106	A	T	T	T	T	T	T	1	1	1	1	0.941176	1	11	9	4	10	17	14	0	0.477273	0	0	0	1	0.333333	0.272727	0.6	0	1	0
40807135	A	G	G	G	G	G	G	1	1	1	1	1	0.666667	11	2	12	5	8	3	0	0	0	0	0	0.409091	0	0	1	1	0	1
1579709	A	T	T	T	T	T	T	0.307692	0.307692	1	1	1	1	13	13	9	2	4	11	0.4375	0	0	0	1	0.235294	0.2	0	0.25	0	0.235294	0
75474495	G	A	A	A	A	A	A	0.449275	1	1	1	1	0.193548	69	34	38	5	16	31	0	0	0.666667	0.222222	0	1	0.5	0	0	0	0	0
22531552	G	C	C	C	C	C	C	1	1	1	1	1	1	76	56	40	76	66	101	0	0.595506	0	0	0	1	0.493333	0.34375	0.313725	0	1	0
43384704	C	T	T	T	T	T	T	1	1	1	1	1	0.5	2	14	2	3	2	4	0.25	0	0	0	1	1	0	0	0	0	1	0
17109966	T	C	C	C	C	C	C	1	0.25	1	1	1	1	10	8	3	12	11	6	0	1	0	0	0	0	0	0	1	0	0	1
28510792	G	A	A	A	A	A	A	1	1	1	1	1	1	3	2	15	2	5	2	1	1	0	0.75	0	1	0	0	0	0	0	0
66982081	C	T	T	T	T	T	T	0.439394	1	0.714286	0.318182	1	0.287879	66	31	42	22	11	66	0	0.380952	0	0	0.272727	0.317073	0	0	0	0.540541	0	0
98020247	C	G	G	G	G	G	G	1	0.153846	0.722222	1	0.529412	1	2	13	18	8	17	14	0	0	0	0.157895	0.5	0.5	0	0	1	0	0	0
75473101	A	G	G	G	G	G	G	0.285714	1	1	1	1	0.461538	14	15	2	6	23	13	0	0	0	0.222222	0.777778	0	1	0	0	0	0.5	0
103894653	G	A	A	A	A	A	A	0.488665	1	0.377358	0.467223	0.445565	0.452489	397	538	106	839	496	442	0	0	0	0	0.491007	0	0	0	0.493793	0	0	0
86024128	T	C	C	C	C	C	C	0.466667	0.413793	1	0.4	0.5	0.425532	45	29	63	25	36	47	0	0	0	0	0.615385	0.344262	0	0	0	0	0	0
27685029	C	T	T	T	T	T	T	0.545455	0.45	0.511628	0.291667	0.581395	0.5	22	20	43	24	43	58	0	0	0	0	0	0	0	0	0	0.641026	0	0
7805751	G	A	A	A	A	A	A	0.5	0.333333	0.5	0.269231	0.392857	0.576923	68	12	24	26	28	26	0	0	0	0	0	0	0	0	0	0.333333	0	0
89345419	T	C	C	C	C	C	C	0.666667	1	1	1	1	0.571429	3	8	8	8	8	7	0	0	0	1	0	0	0	1	0	0	0	1
46407619	G	A	A	A	A	A	A	0.578947	0.647059	1	1	0.571429	1	19	17	15	23	21	43	0.409091	0	0	0	0	0.416667	0.277778	0	0	0.4	0.666667	0.391304
20015099	G	A	A	A	A	A	A	0.666667	0.666667	1	0.521739	0.483871	0.413793	21	15	10	23	31	29	0.5	0	0	0	0	0	0	0.625	0	0	0.4	0
75600834	A	G	G	G	G	G	G	1	1	0.37037	1	1	1	68	80	27	169	123	58	1	0	1	1	0	0	0	0	0.142857	0	0	0
28710268	A	C	C	C	C	C	C	0.428571	0.703704	0.333333	0.76	1	1	21	27	6	25	10	25	0	1	0	0	0	0	0	0	0	1	0	0
11177935	T	C	C	C	C	C	C	1	1	1	1	1	1	3	2	3	3	7	10	0	0.777778	0	0	0	0	0	0	1	1	0	1
48858127	A	T	T	T	T	T	T	0.666667	0.428571	1	1	0.357143	0.2	9	7	2	3	14	10	0	0	0	0.6	0.833333	0	0	0	0	0	0	0
75473652	G	A	A	A	A	A	A	0.685714	1	1	1	1	0.304348	35	35	10	3	5	23	0	0	0	0	0.666667	0.866667	0.571429	0	0	0	0.666667	0
27882589	T	C	C	C	C	C	C	0.258621	0.333333	0.68	1	0.363636	0.44186	58	48	25	2	22	43	0	0	0	0	0	0	0	0	0	0.409091	0.45	0
15468730	T	C	C	C	C	C	C	0.6	1	1	1	0.166667	1	5	7	2	7	12	4	0.75	0	0	0	0.8	1	0	0	0	0	0	0
78377687	A	C	C	C	C	C	C	0.428571	0.833333	0.666667	1	1	1	7	6	9	3	3	4	0	0	0	0	0	0	0	0	1	1	0	0.714286
28426059	T	C	G	G	G	G	G	1	1	1	1	1	1	2	69	23	88	132	119	0.944444	0.961538	0	0	0	0.277778	0	0	0.603175	1	0	0
28426059	T	C	G	G	G	G	G	1	1	1	1	1	1	2	69	23	88	132	119	0.944444	0.961538	0	0	0	0.277778	0	0	0.603175	1	0	0
77239743	G	A	A	A	A	A	A	1	0.380952	1	1	1	1	19	21	33	10	8	22	0	0	0	0	0.375	0.211538	0.526316	0	0.555556	0	0.5	1
7842161	T	A	A	A	A	A	A	0.416667	0.4	0.4375	0.375	0.75	0.5	12	10	16	8	4	16	0	0	0	0	0	0	0.666667	0	0	0	0	0
96575637	C	T	T	T	T	T	T	1	1	1	1	0.444444	0.25	36	22	3	6	18	16	0	0.7	0	0.5	1	0	0	0.285714	0	0	0	0
61206374	A	T	T	T	T	T	T	0.609756	0.314286	1	0.486486	0.378378	1	41	35	6	37	37	36	0	0	0.545455	0.536585	0.5	0	0	0	0	0	0	0
117163939	T	C	C	C	C	C	C	0.75	0.47619	0.46875	1	1	1	28	42	32	22	16	19	0	0	0.75	0.615385	0	0.625	0	0.5	0	0	0	0
10927711	C	T	T	T	T	T	T	1	1	1	1	1	1	22	13	24	2	1	22	0	0.733333	0.285714	0.344828	0	0.692308	0	0	0	0.6	0.777778	0.363636
100481720	A	G	G	G	G	G	G	0.384615	0.28125	0.777778	0.538462	0.708333	1	39	32	18	52	24	47	0	0	0.923077	0.566038	0	0	0	0	0	0	0	0
45671000	G	C	C	C	C	C	C	0.555556	1	0.555556	1	1	1	9	7	9	13	2	11	0.208333	0	0	0	0.1875	1	0	0.263158	0.448276	0.375	0.428571	0
9160833	C	T	T	T	T	T	T	0.5	0.285714	1	1	0.714286	1	4	7	2	6	7	9	0	0	0.5	0	0	0	0.5	0	0.5	0.8	0	0
5440415	G	A	A	A	A	A	A	1	1	1	1	1	1	8	4	12	6	6	7	0.8	1	0	1	0	0	0	0	0	0	1	0
28720628	T	C	C	C	C	C	C	1	0.833333	0.666667	1	0.6	1	2	6	3	3	5	7	0	0	0.5	0	0	0	0	0	0.8	0.6	1	0
29239848	C	T	T	T	T	T	T	0.439024	0.413793	0.64	0.431818	0.417722	0.453333	82	58	25	88	79	75	0	0	0	0	0	0	0.6	0	0	0	0	0
7608753	A	G	G	G	G	G	G	0.428571	0.666667	1	1	0.5	0.6	7	6	2	2	4	5	1	0	0	0	0	0	0	0	0	0	1	0
7842115	C	T	T	T	T	T	T	0.5	0.357143	0.529412	0.285714	0.6	0.588235	12	14	17	7	5	17	0	0	0	0	0	0	0.666667	0	0	0	0	0
111189778	G	C	C	C	C	C	C	1	1	1	1	0.857143	1	2	7	7	6	7	7	1	1	0	0	0	0	0	0	0	1	0.666667	0
18652039	G	A	A	A	A	A	A	1	0.4	1	1	1	0.285714	5	5	1	3	10	7	0	0	0	0.5	0	0	0	0	1	0	1	0
13587953	G	T	T	T	T	T	T	1	0.5	1	1	1	1	2	4	2	4	4	2	1	0	1	0.571429	0.75	0	0	0	0	0	0	0
184197	T	C,A	C,A	C	C	C	C	1	1	0.222222	1	0.181818	1	11	6	18	1	11	7	0	0	0	0.2	0	0	0.6	0	0.285714	0.428571	0	0.714286
7842139	C	T	T	T	T	T	T	0.538462	0.357143	0.466667	0.3	0.6	0.578947	13	14	15	10	5	19	0	0	0	0	0	0	0.666667	0	0	0	0	0
126232855	T	C	C	C	C	C	C	0.6	1	1	1	0.416667	0.75	5	3	2	5	12	4	0.6	0	0	0	0	1	0	0	0	1	0	0
7575829	G	A	A	A	A	A	A	0.5	1	1	1	1	0.666667	4	3	15	2	4	6	0	0	1	1	0	0	0	0	0	1	0	0
53227291	T	C	C	C	C	C	C	1	1	1	1	0.833333	1	11	3	11	11	6	7	1	0	0	0	0	0	1	0	0.666667	1	0	0
742254	T	C	C	C	C	C	C	1	0.833333	1	1	1	1	2	6	4	6	2	5	0	0	0.666667	0	1	0	0	0	1	1	0	0
117176075	C	A	A	A	A	A	A	0.384615	0.387097	0.47619	1	1	1	39	31	21	13	19	26	0	0	0	0	0.75	0.333333	0	1	0	0	0	0
51827553	G	A	A	A	A	A	A	1	0.625	1	1	0.538462	1	10	8	2	6	13	4	0	0	0	1	1	0	0	1	0	0	0	0
74734900	C	G,T	T	G	T	T	T	1	0.636364	0.857143	0.666667	0.666667	1	5	11	21	6	3	2	1	0	0	0	0	0	0	1	0	0.666667	0	0
7842125	T	G	G	G	G	G	G	0.538462	0.4375	0.4375	0.285714	0.6	0.526316	13	16	16	7	5	19	0	0	0	0	0	0	0.666667	0	0	0	0	0
63634723	G	C	C	C	C	C	C	1	1	1	1	1	0.866667	5	8	5	10	2	15	0	0	0	0.833333	0	0	1	0	0.875	1	0	0
29988514	T	C	C	C	C	C	C	0.333333	0.444444	0.1875	0.666667	0.692308	0.428571	9	9	16	6	13	14	0	0	0	0	0	0	0	0	0	0.6	0	0
117163940	G	T	T	T	T	T	T	0.75	0.5	0.433333	1	1	1	28	42	30	22	16	18	0	0	0.75	0.615385	0	0.666667	0	0.5	0	0	0	0
77240455	A	C	C	C	C	C	C	0.978495	0.36	0.991597	1	0.894737	0.947368	93	50	119	25	19	38	0	0	0	0	0.4	0.46281	0.354331	0	0.423077	0	0.380952	1
98020075	T	C	C	C	C	C	C	1	0.5	0.461538	1	0.428571	1	3	10	13	15	7	8	0	0	0	0.333333	0.3	0.272727	0	1	0	0	0.333333	0
7845455	A	G	G	G	G	G	G	0.559406	0.459459	0.516667	0.442786	0.426966	0.573333	202	111	60	201	89	150	0	0	0	0	0	0	0.47619	0	0	0	0	0.354839
6223923	G	A	A,T	A	A	A	A	0.857143	1	1	1	0.888889	1	7	3	2	3	9	3	0	0	0	0	0	0	1	1	0	0.6	1	0
31539260	T	C	C	C	C	C	C	1	0.789474	0.961538	0.818182	1	0.790698	22	19	52	11	23	43	0.6	0	0	0	0	0	1	0	0.888889	0	0.727273	0
8052163	G	A	A	A	A	A	A	0.559211	0.446809	1	0.594828	1	1	152	94	64	116	109	136	1	0	0	0	0.438889	0	0	0.574468	0	0	0.444444	0
24697550	G	C	C	C	C	C	C	1	1	1	1	1	1	7	7	19	3	5	6	1	1	0	0	0	0	0	0	0.333333	1	0.52381	0
57502267	T	C	C	C	C	C	C	0.75	0.714286	1	1	1	0.75	4	7	3	2	3	4	0	0	1	0.571429	1	0	0	0	0	0.5	0	0
25630602	C	T	T	T	T	T	T	0.352941	1	1	1	1	0.5	17	5	2	12	6	8	0.25	0.272727	0	0.307692	0.666667	0.588235	0	0.625	0	0	0	0
14602005	G	A	A	A	A	A	A	0.875	1	1	1	1	1	8	18	34	7	18	18	1	0	0	0	0	0	0	0.466667	0	0.521739	1	0.75
86024598	T	C	C	C	C	C	C	0.617021	0.642857	1	0.413793	0.454545	1	47	28	34	29	22	38	0.521739	0	0	0	0.828571	0.642857	0	0	0	0	0	0
15094342	C	A	A	A	A	A	A	0.473684	0.5	0.541667	0.583333	0.5	1	19	14	24	12	8	25	0.625	0	0	0	0	0.465116	0	0	0	0.375	0	0
16822525	G	A	A	A	A	A	A	1	0.333333	1	0.8	1	1	8	6	7	5	2	7	0	0	1	0	0	1	0	0	1	0	0	0
26584988	C	T	T	T	T	T	T	1	0.3	1	0.9	1	1	6	10	5	10	5	9	0	0.388889	0	0	1	0	0	0.428571	0	0.25	1	0
22532920	G	C	C	C	C	C	C	1	1	1	1	1	1	8	12	2	13	20	22	0	0.520833	0	0	0	1	0.444444	0.545455	0.36	0	1	0
18352793	A	C	C	C	G,C	G	C	1	0.272727	0.363636	1	0.642857	0.7	9	11	11	8	14	20	0	0.75	0	0	0	0	0	0.5	0	0	0	0.6
80318440	T	C	C	C	C	C	C	1	1	1	1	1	0.5	2	3	5	7	4	2	0	0	0.75	0	0	0	0	0	0.571429	0.8	0.75	0.5
117177228	C	T	T	T	T	T	T	0.464567	0.423077	0.512605	1	1	1	127	104	119	44	23	72	0	0	0.425532	0.457143	0.411765	0.52381	0	0.461538	0	0	0	0
19544367	T	C	C	C	C	C	C,A	0.727273	0.888889	0.5	1	1	1	11	9	6	7	9	4	0	0	1	1	0	0	1	0	0	0	0	0
86693993	C	T	T	T	A	T	T	0.653846	0.571429	0.333333	0.2	0.357143	1	26	14	39	10	14	10	0	0	0	0	0	0	0	1	0	0	0	0
15862290	A	T	T	T	T	T	T	1	0.388889	0.625	1	0.427184	0.970149	24	36	16	26	103	67	0	0	0	0	0	0.28	0.416667	0	0	0	0.952381	0.647059
49144255	C	T	T	T	T	T	T	1	0.888889	1	0.5	1	0.526316	24	9	10	22	30	19	0.542857	0	0	0.181818	0.647059	0	0	0	1	0	0	0.428571
144578963	C	T	T	T	T	T	T	0.444444	1	1	0.789474	0.692308	1	18	18	2	19	13	6	0.272727	0.176471	0.75	0.5	0	0.227273	0	0.588235	0	0	0	0.3
63651325	A	T	T	T	T	T	T	1	1	1	1	1	1	7	4	8	5	6	18	0.95	0	0	0	0	0	0	0	0.96	0.442068	0.538462	1
26315649	A	T	T	T	T	T	T	1	0.5	0.846154	1	0.5	0.466667	7	6	13	18	12	15	0	0	0.727273	0.642857	0	0	0	0.833333	0	0	0	0
43451497	A	G	G	G	G	G	G	0.475177	0.99505	1	0.507177	0.464286	0.989796	141	202	100	209	140	196	0.457286	0	0	0	0	0.579545	0	0.330508	0.474286	0.482955	0	0
27572322	T	C	C	C	C	C	C	0.428571	0.5	1	0.857143	0.153846	0.235294	7	6	2	14	13	17	0	0	0	0	0	0	0	0	0.285714	0.5	0	0.285714
86835462	A	G	G	G	G	G	G	0.571429	0.9	1	0.666667	0.714286	0.714286	7	10	3	6	7	7	0	0	0	0	0	0	0.75	0	1	0.714286	0	0
63651379	T	A	A	A	A	A	A	1	1	1	1	1	1	5	2	5	4	11	10	1	0	0	0	0	0	0	0	0.954545	0.443548	0.5	1
48627305	A	G	G	G	G	G	G	1	1	1	0.833333	1	1	12	13	4	6	5	13	0.6	0	0.5	0.333333	0	0	0	0	1	0.3	1	0
1626009	A	G	G	G	G	G	G	1	1	1	1	1	1	7	2	5	3	3	10	1	0	0	0	0	1	0.4	0	0.5	0	0	1
60502045	C	A	A	A	A	A	A	1	1	1	0.5	1	0.6	14	5	3	6	2	5	0	0	0	0	1	0	0	1	1	0	0	0
76853417	T	C	C	C	C	C	C	1	0.555556	1	1	0.666667	1	16	9	2	9	3	43	0	0	0.315789	0.263158	0.4	0.625	0	0	0.521739	0	1	0
35960689	T	G	G	G	G	G	G	0.722222	1	1	0.703704	0.416667	0.565217	18	23	4	27	24	23	0	0	0.333333	0	0	1	0	0.478261	0	0.5	0	0
63651335	G	A	A	A	A	A	A	1	1	1	1	1	1	6	4	8	5	6	19	1	0	0	0	0	0	0	0	0.938776	0.465028	0.5	1
51827611	C	T	T	T	T	T	T	1	0.666667	1	1	0.428571	1	8	3	2	6	7	7	0	0	1	1	1	0	0	0	0	0	0	0
41840358	G	A	A	A	A	A	A	0.243243	0.578947	1	1	0.235294	1	37	19	7	23	17	31	0	0	0.615385	0.392157	0	0.555556	0	0.4	0	0	0	0
6725388	G	A	A	A	A	A	A	0.454545	1	1	1	1	0.75	11	9	4	2	2	4	0	0	1	1	0	0	0.666667	0	0	0	0.444444	0
57375273	C	T	T	T	T	T	T	1	0.333333	0.625	0.692308	1	0.357143	23	9	16	13	11	14	0.291667	0	0	0.166667	0	0	0.285714	0	0.571429	0	0	0.6
7841779	C	T	T	T	T	T	T	0.222222	0.307692	0.588235	0.571429	0.666667	0.304348	18	13	34	7	6	23	0	0	0	0	0	0	0	0	0	0	0	0.571429
89838171	G	A	A	A	A	A	A	1	0.47619	1	1	1	1	13	21	23	13	17	13	1	0	0	0	0	0	0	0	1	0.888889	0	0.5
70515127	C	T	T	T	T	T	T	1	1	1	0.996855	0.987342	0.560284	1056	796	384	318	237	564	0	1	0.439394	0.504808	0.477541	0.497436	0	0	0	0.541833	0	0
5440604	G	T	T	T	T	T	T	1	1	1	1	1	1	9	9	9	7	6	7	0.75	0	0	0.5	0	1	0	1	0	0.666667	0	0
5440617	G	T	T	T	T	T	T	1	1	1	1	1	1	11	11	9	7	5	8	0.75	0	0	0.5	0	1	0	1	0	0.666667	0	0
70515152	A	G	G	G	G	G	G	1	0.995283	1	1	1	0.566879	884	636	326	266	182	471	0	1	0.454936	0.534392	0.436842	0.506061	0	0	0	0.546835	0	0
46574126	A	G	G	G	G	G	G	0.5	1	1	0.8	0.5	0.6875	4	3	2	5	6	16	0	0	0	0	0	0	0	0	1	0.571429	0	0.833333
10052141	G	A	A	A	A	A	A	0.705882	0.266667	0.285714	0.971429	0.483871	0.714286	17	30	14	70	31	28	0	0	0	0	0	0	0	0	0	0.78125	0.565217	0
45671003	C	A	A	A	A	A	A	0.555556	1	0.555556	0.923077	1	1	9	8	9	13	2	11	0.181818	0	0	0	0.1875	1	0	0.263158	0.464286	0.428571	0.428571	0
48250867	A	T	T	T	T	T	T	1	1	1	1	1	1	10	10	7	5	5	12	0	0	0	0	0.923077	1	0	1	0	0	0	1
117176860	A	C	C	C	C	C	C	0.364742	0.357977	0.366667	1	0.942857	0.980583	329	257	300	67	35	103	0	0	0.373134	0.322314	0.695652	0.156863	0	0.388889	0	0	0	0
61221009	C	T,A	T	T	T	T	T	1	1	1	0.357143	0.833333	0.4	14	20	2	14	6	5	0.333333	0	0	0	0	0	0	0.555556	0	0.333333	1	0.296296
37552936	G	A	A	A	A	A	A	1	1	0.538462	0.608696	0.431373	0.681818	50	36	13	46	51	66	0	0	0	0	0.227273	0	0	0	0.410714	0.974359	0.578947	0
28049088	A	G	G	G	G	G	G	1	1	1	1	1	1	2	2	3	3	2	3	0	0	0	0.6	1	1	0	0	0	0.333333	1	0
14429123	G	A	A	A	A	A	A	0.888889	1	1	0.833333	1	1	9	3	4	6	4	7	0	0	0.833333	0.888889	0	0.6	0	1	0	0	0	0.333333
83824494	T	G	G	G	G	G	G	1	1	1	1	1	0.571429	5	10	2	3	24	14	0	0	0	0	0.333333	0.6	1	0.4	0.172414	0	0	1
56859657	G	A	A	A	A	A	A	1	0.339286	0.38	0.446809	0.416667	1	63	56	50	47	48	71	0	0	0	0	0	0	0.441176	0	0	0	0.5	0.576471
22531638	C	T	T	T	T	T	T	1	1	1	1	1	1	58	53	32	55	43	71	0	0.534247	0	0	0	1	0.561404	0.44	0.4	0	1	0
98020842	T	C	C	C	C	C	C	1	0.3	0.892857	1	0.375	1	9	10	28	4	8	11	0.666667	0	0	0.434783	0	0.411765	0	0	1	0	0	0
7778361	A	G	G	G	G	G	G	1	1	1	0.428571	1	1	17	10	2	14	10	21	0.375	0	0	0	0	0	1	0	0	1	0	1
7842071	G	T	T	T	T	T	T	0.375	0.4	0.615385	0.428571	0.4	0.5	8	10	13	7	5	14	0	0	0	0	0	0	0	0	0	0	0	0.666667
32445210	G	A	A	A	A	A	A	1	0.484375	0.5	1	1	0.517241	48	64	22	55	39	58	0	0.40625	0	0	1	0	0.5	0	0	0	0.543478	0
14323713	C	G	G	G	G	G	G	1	0.416667	0.666667	1	0.428571	0.538462	6	12	6	2	7	13	0	1	0	0	1	0	0	0	0	0	0	0
36853633	C	T	T	T	T	T	T	1	1	1	1	1	0.8	6	8	12	2	1	5	0	0	0.75	1	0	0	0	1	1	0	0	0
45711177	C	G	G	G	G	G	G	0.333333	1	1	0.714286	1	1	6	2	2	7	5	5	1	0	0	0	0	1	0	0	0	0	1	0
51930590	C	G	G	G	G	G	G	0.454988	0.384615	0.419619	0.449198	0.407547	0.458438	411	260	367	187	265	397	0	0	0	0	0	0.533406	0	0	0	0	0	0
61128174	T	C	C	C	C	C	C	0.4	0.75	1	0.666667	1	1	5	4	3	6	5	8	0.866667	0	0.6	0.909091	0	0	0	0	0.4	0	0	0
39457546	A	G	G	G,T	G	G	G	0.571429	0.692308	1	0.631579	0.8	0.666667	14	13	3	19	10	12	0	0	0	0	0	0	0	0	0.6	0.888889	0.375	0.458333
22843716	A	G	G	G	G	G	G	1	0.407407	1	0.580645	1	1	30	27	8	31	34	63	0	0	0	0	0.464286	0.447917	0.4	1	0	0	0.636364	0
20982292	C	T	T	T	T	T	T	1	0.636364	1	1	1	0.4	3	11	2	3	3	5	0	0	0	0	0	0	1	1	1	0	0	0
24697483	T	A	A	A	A	A	A	1	1	1	1	1	1	6	9	15	2	6	10	1	1	0	0	0	0	0	0	0.4	1	0.565217	0
119908303	C	A	A	A	A	A	A	1	0.666667	1	1	1	1	2	6	26	7	19	22	0	1	0	0	1	0.3	0	0	0	1	0.333333	0
19278176	G	A	A	A	A	A	A	0.833333	1	1	1	1	1	6	8	7	5	13	13	0	1	0	1	1	0	0.8	0	0	0	0	0
22205320	T	G	G	G	G	G	G	0.993902	1	0.947917	1	1	0.994318	164	123	96	104	107	176	0.42	0.427586	0	0	0.990476	0.377049	0.506608	0.41	0.382353	0	0.391304	0
6544024	T	C	C	C	C	C	C	0.666667	1	1	1	1	1	9	7	2	6	5	5	0.388889	0	1	1	0.25	0	0	0	0	1	0	0
28357337	G	T	T	T	T	T	T	0.390863	0.428571	0.1875	0.428169	0.619048	0.33945	197	147	64	355	231	109	0	0	0	0	0	0	0	0.366071	0	0	0	0
113572428	G	A	A	A	A	A	A	1	0.363636	0.571429	1	1	0.55102	36	22	14	25	36	49	0	0.454545	0	0	1	0	0.692308	0	0	0	0.3125	0
76853216	G	T	T	T	T	T	T	1	1	1	1	0.571429	1	17	7	10	9	7	67	0	0	0.5	0.444444	0.636364	0.3	0	0	0.666667	0	0	1
83824666	A	T	T	T,G	T	T	T	1	1	1	1	1	0.545455	13	12	4	12	15	11	0	0	0	0	0.344828	0.181818	1	0.5	0.5	0	0	1
20015114	C	T	T	T	T	T	T	0.714286	0.75	1	0.48	0.565217	0.413793	21	12	10	25	23	29	0.518519	0.5	0	0	0	0	0	0.529412	0	0	0.357143	0
86863719	G	C	C	C	C	C	C	0.352941	1	1	0.5	0.846154	0.647059	17	11	7	14	13	17	0	0	0	0	0	0	0	0	1	0.333333	0	1
90392044	A	G	G	G	G	G	G	0.75	0.833333	1	0.3	0.578947	0.75	4	6	2	10	19	4	0	0	0	0	0	0	0	0	0.4	1	0	0.8
10275739	A	T	T	T	T	T	T	1	0.571429	0.44	1	1	1	4	7	25	7	6	13	0	0	0	0	1	1	0	0	0	0	1	0
10749335	C	T	T	T	T	T	T	0.470588	1	0.925926	0.472222	1	0.505495	51	33	27	36	39	91	0	0	0.291667	0.489583	0	0	1	0	0	0	0	0.583333
7778355	C	A	A	A	A	A	A	1	1	1	0.384615	1	1	17	10	2	13	11	22	0.375	0	0	0	0	0	1	0	0	1	0	1
77240137	A	G	G	G	G	G	G	1	0.444444	1	0.875	1	1	29	18	34	16	5	8	0	0	0	0	0.428571	0.375	0.282609	0	0.625	0	0.6	1
112289126	C	T	T	T	T	T	T	0.833333	1	1	1	0.285714	0.666667	6	4	5	5	7	6	0	0	0.4	0.25	0	0.666667	0	0	0.8	0	0.666667	0
57620696	T	C	C	C	C	C	C	0.777778	1	1	1	1	0.222222	9	4	3	3	6	9	0	0	0	1	1	0	0	0	0	1	0	0
56274327	C	A	A	A	A	A	A	1	0.666667	1	1	1	0.333333	3	3	3	3	2	9	1	0	0	1	0	0	0	0	0	0	1	0
75493341	T	G	G	G	G	G	G	0.5	1	1	1	1	0.5	4	18	12	11	4	12	0	0	1	1	0	1	0	0	0	0	0	0
37067334	A	C	C	C	C	C	C	1	1	1	1	0.5	1	3	3	4	2	4	5	0	0	0	0	0	0	1	1	0	0	1	0.5
35561705	T	A	A	A	A	A	A	1	1	1	1	0.5	1	6	9	4	6	4	4	0	1	0	1	0	1	0	0	0	0	0	0.5
5563871	T	C	C	C	C	T	C	1	1	0.5	1	1	1	6	3	4	3	2	4	0.5	0	1	0	0	0	1	0	0	0	1	0
7683125	A	G	G	G	G	G	G	1	1	1	1	1	1	9	5	2	10	8	6	0	0	0	0	0	0	0	0	1	1	1	1
10129377	T	C	C	C	C	C	C	1	1	1	1	1	1	2	4	4	4	3	3	0	0	1	0	1	0	1	1	0	0	0	0
16135915	A	G	G	G	G	G	G	1	1	1	1	1	1	5	5	7	7	6	6	1	1	0	0	1	0	1	0	0	0	0	0
21667077	C	T	T	T	T	T	T	1	1	1	1	1	1	6	3	2	2	2	6	0	0	0	0	1	1	0	0	0	1	0	1
68300788	T	C	C	C	C	C	C,A	1	1	1	1	1	1	12	10	2	2	8	3	1	0	0	0	0	1	0	1	0	1	0	0
68302104	G	A	A	A	A	A	A	1	1	1	1	1	1	20	10	1	5	7	11	1	0	0	0	0	1	0	1	0	1	0	0
72099101	A	G	G	G	G	G	G,T	1	1	1	1	1	1	5	5	6	9	10	11	0	0	1	1	0	0	1	0	1	0	0	0
79199264	G	T	T	T	T	T	T	1	1	1	1	1	1	9	7	5	4	2	4	1	0	1	0	0	0	1	0	0	1	0	0
79199267	T	C	C	C	C	C	C	1	1	1	1	1	1	9	5	5	4	2	2	1	0	1	0	0	0	1	0	0	1	0	0
1014294	G	A	A	A	A	A	A	1	1	1	1	1	1	2	8	10	6	3	3	0	1	0	0	0	0	1	0	0	1	1	0
1138192	T	C	C	C	C	C	C	1	1	1	1	1	1	2	3	2	4	3	2	0	0	0	0	1	1	0	1	0	0	1	0
33486124	A	G	G	G	G	G	G	1	1	1	1	1	1	3	8	5	2	2	2	1	0	1	0	0	0	0	0	0	1	0	1
9149634	C	A	A	A	A	A	A	1	1	1	1	1	1	2	2	5	3	4	2	1	0	0	1	0	1	1	0	0	0	0	0
44122855	T	C	C	C	C	C	C	1	1	1	1	1	1	9	2	5	2	9	6	1	0	1	1	0	1	0	0	0	0	0	0
73729969	T	C	C	C	C	C	C	1	1	1	1	1	1	4	8	9	6	3	3	0	1	1	0	0	0	0	0	1	1	0	0
17253846	G	A	A	A	A	A	A	1	1	1	1	1	1	3	6	2	2	2	2	0	1	0	0	0	1	1	0	1	0	0	0
18470756	C	A	A	A	A	A	A	1	1	1	1	1	1	12	14	12	3	3	3	1	1	1	0	0	0	0	0	1	0	0	0
83256381	G	A	A	A	A	A	A	1	1	1	1	1	1	2	3	3	3	2	4	1	0	0	0	0	1	0	1	0	1	0	0
83358809	T	G	G	G	G	G	G	1	1	1	1	1	1	2	2	4	15	3	2	1	0	0	0	1	0	1	0	1	0	0	0
39672127	A	T	T	T	T	T	T	1	1	1	1	1	1	4	5	3	3	8	6	1	1	0	0	1	0	0	0	0	1	0	0
65711032	A	G	G	G	G	G	G	1	1	1	1	1	1	2	3	4	4	10	4	1	1	1	0	0	0	0	0	0	0	0	1
68427287	T	C	C	C	C	C	C	1	1	1	1	1	1	6	2	19	4	2	5	0	0	1	0	1	1	1	0	0	0	0	0
68427332	A	G	G	G	G	G	G	1	1	1	1	1	1	3	2	16	3	7	2	0	1	1	0	0	1	1	0	0	0	0	0
46231932	A	G	G	G	G,T	G	G	1	1	1	1	1	1	2	5	4	3	2	2	0	0	0	1	0	0	1	0	1	1	0	0
58676938	C	G	G	G	G	G	G	1	1	1	1	1	1	3	5	2	6	6	7	0	0	0	0	1	0	1	0	0	0	1	1
58676945	A	G	G	G	G	G	G	1	1	1	1	1	1	4	6	3	6	7	8	0	0	0	0	1	0	1	0	0	0	1	1
19884953	T	C	C	C	C	C	C	1	1	1	1	1	1	12	12	5	18	16	23	1	0	0	0	0	0	0	0	1	1	0	1
28664489	A	G	G	G	G	G	G	1	1	1	1	1	1	5	4	3	4	4	3	0	0	1	1	0	0	0	0	0	0	1	1
30312724	T	C	C	C	C	C	C	1	1	1	1	1	1	4	6	6	7	5	6	1	1	0	0	1	0.666667	0	0	0	0.333333	0	0
41088022	T	A	A	A	A	A	A	1	1	1	1	1	1	4	8	9	7	3	3	0	0	1	0	0	1	0	0	1	1	0	0
136708967	G	A	A	A	A	A	A	1	1	1	1	1	1	5	3	2	5	2	2	1	0	0	0	0	1	0	0	1	1	0	0
140402182	C	T	T	T	T	T	T	1	1	1	1	1	1	7	6	4	3	3	4	0	0	1	1	0	0	0	1	0	0	1	0
14533352	A	G	G	G	G	G	G	1	1	1	1	1	1	5	3	2	4	4	5	0	0	0	1	0	0	0	0	1	1	0	1
23670753	A	G	G	G	G	G	G	1	1	1	1	1	1	2	4	9	2	4	3	0	1	1	1	0	0	0	0	0	0	0	1
12266885	A	G	G	G	G	G	G	1	1	1	1	1	1	9	4	2	7	10	5	1	1	0	0	0	0	0	0	1	0	0	1
3239439	C	G	G	G	G	G	G	1	1	1	1	1	1	9	6	2	6	6	5	1	0	1	0	0	0	0	0	1	0	1	0
21447859	T	C	C	C	C	C	C	1	1	1	1	1	1	4	3	5	4	2	5	1	0	0	0	0	0	0	1	1	1	0	0
38825265	T	C	C	C	C	C	C	1	1	1	1	1	1	2	2	4	2	7	3	0	0	0	1	1	0	0	1	0	1	0	0
2186477	A	G	G	G	G	G	G	1	1	1	1	1	1	2	2	3	3	2	3	0	0	0	0	1	0	0	1	1	0	0	1
2186479	C	T	T	T	T	T	T	1	1	1	1	1	1	2	2	3	3	2	3	0	0	0	0	1	0	0	1	1	0	0	1
2186492	A	C	C	C	C	C	C	1	1	1	1	1	1	3	3	4	5	2	4	0	0	0	0	1	0	0	1	1	0	0	1
2186498	G	C	C	C	C	C	C	1	1	1	1	1	1	3	3	4	5	2	4	0	0	0	0	1	0	0	1	1	0	0	1
2186503	A	G	G	G	G	G	G	1	1	1	1	1	1	3	3	4	5	2	4	0	0	0	0	1	0	0	1	1	0	0	1
2186504	G	A	A	A	A	A	A	1	1	1	1	1	1	3	3	4	5	2	4	0	0	0	0	1	0	0	1	1	0	0	1
2186508	G	A	A	A	A	A	A	1	1	1	1	1	1	3	3	4	5	2	4	0	0	0	0	1	0	0	1	1	0	0	1
2186509	T	G	G	G	G	G	G	1	1	1	1	1	1	3	3	4	5	2	4	0	0	0	0	1	0	0	1	1	0	0	1
2186517	T	C	C	C	C	C	C	1	1	1	1	1	1	3	3	4	6	2	5	0	0	0	0	1	0	0	1	1	0	0	1
2186519	A	G	G	G	G	G	G	1	1	1	1	1	1	3	3	4	6	2	5	0	0	0	0	1	0	0	1	1	0	0	1
8495909	C	A	A	A	A	A	A	1	1	1	1	1	1	3	9	13	3	8	14	0	0	1	1	0	1	0	0	0	0	0	1
8790721	A	C	C	C	C	C	C	1	1	1	1	1	1	2	2	4	4	3	5	0	0	0	1	0	0	0	0	1	1	0	1
33900492	C	A	A	A	A	A	A	1	1	1	1	1	1	6	5	3	4	6	2	0	1	0	1	0	0	0	0	1	0	1	0
33900510	A	G,T	G	G	G	G	G	1	1	1	1	1	1	6	4	3	2	4	2	0	1	0	1	0	0	0	0	1	0	1	0
15351866	A	G	G	G	G	G	G,T	1	1	1	1	1	1	3	3	2	3	2	3	0	1	1	0	0	0	0	1	0	1	0	0
18692206	C	G	G	G	G	G	G	1	1	1	1	1	1	5	2	3	2	3	10	1	0	0	0	0	1	0	0	1	0	1	0
41626828	N	A	A	A	A	A	A	1	1	1	1	1	1	2	2	3	4	4	7	0	0	0	0	0	0	0	1	0	1	1	1
131360671	A	G	G	G	G	G	G	1	1	1	1	1	1	2	9	3	3	2	3	0	0	0	1	1	1	0	0	0	1	0	0
15140926	T	C	C	C	C	C	C	1	1	1	1	1	1	6	4	6	2	3	2	0	1	1	0	0	1	0	0	0	0	1	0
35816172	N	G	G	G	G	G	G	1	1	1	1	1	1	2	4	5	2	2	4	0	0	0	0	1	0	1	0	0	1	1	0
46970346	T	A	A	A	A	A	A	1	1	1	1	1	1	2	3	7	2	2	4	0	0	0	0	0	0	0	0	1	1	1	1
94255075	T	G	G	G	G	G	G	1	1	1	1	1	1	4	2	2	2	7	9	0	0	0	0	0	0	0	1	1	1	1	0
23394409	N	A	A	A	A	A	A	1	1	1	1	1	1	4	4	3	5	3	6	1	1	1	1	0	0	0	0	0	0	0	0
70021463	N	T	T	T	T	T	T	1	1	1	1	1	1	2	2	2	2	2	2	1	0	0	0	1	0	0	0	1	0	0	1
42246514	G	T	T	T	T	T	T	1	1	1	1	1	1	7	4	4	5	3	21	0	0	0	0	0	1	0	0	1	1	0	1
42246540	C	G	G	G	G	G	G	1	1	1	1	1	1	7	4	4	6	3	19	0	0	0	0	0	1	0	0	1	1	0	1
91897952	G	T	T	T	T	T	T	1	1	1	1	1	1	14	11	6	12	5	12	0	0	0	0	0	1	0	0	1	1	1	0
112374942	G	A	A	A	A	A	A	1	1	1	1	1	1	3	8	2	3	4	2	1	0	0	1	0	0	0	0	1	1	0	0
13080246	G	A	A	A	A	A	A	1	1	1	1	1	1	3	5	10	2	7	10	0.2	0	0	0.8	1	0	0	0	0	1	0	1
28373319	T	C	C	C	C	C	C	1	1	1	1	1	1	5	2	2	3	9	2	1	1	0	1	0	0	0	0	1	0	0	0
86180649	T	C	C	C	C	C	C	1	1	1	1	1	1	4	2	4	7	6	5	0	0	0	1	0	0	1	1	0	1	0	0
116754661	G	A	A	A	A	A	A	1	1	1	1	1	1	2	5	7	2	4	5	0	0	1	1	1	0	1	0	0	0	0	0
658869	C	A	A	A	A	A	A	1	1	1	1	1	1	4	14	8	4	2	2	0	0	0	0	0	0	1	1	1	1	0	0
658889	G	T	T	T	T	T	T	1	1	1	1	1	1	4	14	8	4	2	2	0	0	0	0	0	0	1	1	1	1	0	0
109683631	G	A	A	A	A	A	A	1	1	1	1	1	1	2	5	2	3	2	4	0	1	0	0	0	0	1	0	1	0	1	0
111591448	G	A	A	A	A	A	A	1	1	1	1	1	1	5	2	10	4	8	5	0	0	0	0	0	0	0	1	1	1	1	0
67810022	T	A	A	A	A	A	A	1	1	1	1	1	1	2	3	7	2	4	8	1	0	0	0	0	0	0	1	1	0	0	1
99935898	A	G	G	G	G	G	G	1	1	1	1	1	1	41	26	10	5	9	2	0	1	0	0	0	0	0	0	1	0	1	1
50719484	T	C	C	C	C	C	C	1	1	1	1	1	1	2	2	3	3	4	2	1	0	1	0	1	1	0	0	0	0	0	0
50719489	T	C	C	C	C	C	C	1	1	1	1	1	1	2	2	3	3	4	2	1	0	1	0	1	1	0	0	0	0	0	0
61466388	T	C	C	C	C	C	C	1	1	1	1	1	1	7	3	2	2	2	3	0	0	0	0	0	1	0	1	0	1	0	1
95708288	A	G	G	G	G	G	G	1	1	1	1	1	1	2	4	5	2	2	12	0	0	0	0	1	1	0	0	0	1	1	0
96055152	C	T	T	T	T	T	T	1	1	1	1	1	1	2	3	5	2	4	4	0	0	0	0	1	1	0	0	0	1	0	1
142262206	C	T	T	T	T	T	T	1	1	1	1	1	1	7	2	9	3	8	5	1	0	0	0	1	0	0	0	1	1	0	0
13420344	A	G	G	G	G	G	G	1	1	1	1	1	1	3	5	8	5	2	2	0.666667	1	0	1	0	0	0	0	0.666667	0	0.666667	0
75493854	T	G	G	G	G	G	G	0.35	1	1	1	1	0.5625	20	28	21	5	2	16	0	0	0	1	0	1	0.666667	0	0	0	0.25	0
13832875	C	T	T	T	T	T	T	0.5	0.483146	0.653061	0.546667	0.565789	0.595238	78	89	49	75	76	126	0	0	0.350877	0.510204	0	0	0	0	0	0.487805	0	0
60317209	G	A	A	A	A	C	C	0.714286	0.363636	0.363636	0.75	0.666667	0.692308	14	22	22	24	3	13	0.477273	0	0	0	0	0	0	0	0.628571	0.45	0	0
56471736	G	A	A	A	A	A	A	0.75	0.666667	0.5	0.5	0.777778	0.8	4	3	6	10	9	5	0	0	0	0	0	0.333333	0.5	0.666667	0	0	0	0.5
27684456	G	A	A	A	A	A	A	0.5	0.454545	0.72093	0.388889	0.517241	0.42	8	11	43	18	29	50	0	0	0	0	0	0	0	0.625	0	0.387097	0	0
31479473	T	C	C	C	C	C	C	0.461538	0.333333	1	0.75	1	0.444444	13	12	11	4	4	18	0	0.666667	0	0.333333	0	0	0	0	0	0.5	0	0.5
64231703	T	C	C	C	C	A	C	0.736842	0.777778	0.6	1	0.666667	1	19	9	10	5	6	10	0	0	1	1	0	0	0	0	0	0.363636	0	0.428571
65882968	T	G	G	G	G	G	G	0.508274	0.53144	0.493653	0.443869	0.99435	0.459807	423	493	709	579	354	622	0	0.469734	0	0	0	0	0.512456	0	0	0	0.462921	0
46455767	A	G	G,C	G	G	G	G	0.785714	1	1	1	1	0.7	14	10	8	2	3	10	0	0	0	0	0	0	1	0	1	0.5	1	0
15726038	A	G	G	G	G	G	G	1	1	1	1	0.75	0.9	2	3	2	4	4	10	0	0	0	1	0.666667	0	0	1	0	0	0	1
15406222	T	A	A	A	A	A	A	0.3125	0.545455	0.416667	0.566667	0.3125	1	16	11	12	30	16	49	0	0	0.192308	0.673913	0	0	0	0	0	0.304348	0	0
75463611	C	T	T	T	T	T	T	0.501176	0.998381	1	1	0.990461	0.489768	1275	1235	654	774	629	733	0	0.451169	0.491132	0.493988	0	0.568333	0.511971	0	0	0	0.480357	0
49722668	T	C	C	C	C	C	C	1	0.454545	1	1	1	0.375	13	11	4	5	2	16	0	0	0	0	0.25	0	0.6	0	1	0	0.6	0.4
103599344	T	C	C	C	C	C	C	1	1	1	0.666667	0.6	1	13	2	4	3	5	2	0	0	0.4	0.888889	1	1	0	0	0	0	0	0
34779588	C	T	T	T	T	T	T	0.411348	1	1	1	0.394231	0.991111	141	128	101	135	104	225	0	0	0	0	0	0.515957	0.401235	0	1	0	0.491379	0.41129
51185375	G	A	A	A	A	A	A	0.432692	0.540984	1	0.471014	1	0.525974	104	122	42	138	106	154	0.994083	0	0	0	0	0	0	0	0	1	0	0
88770241	T	C	C	C	C	C	C	0.5	1	1	1	0.571429	0.571429	6	2	2	5	7	7	0	0	0	0	0	0	0	0	1	0	1	0.666667
60316962	G	A	A	A	A	A	A	0.393939	0.435897	0.6	0.461538	1	0.534884	33	39	30	52	33	43	0.404762	0	0	0	0	0	0	0	0.577778	0.470588	0	0
90248035	A	T	T	T	T	T	T	0.625	1	0.5	0.375	0.428571	0.692308	16	5	8	16	14	13	0	0.514286	0.416667	0.24359	0	0.473684	0	0	0	0	0	0
104350347	C	G	G	G	G	G	G	1	1	1	1	1	1	24	25	14	7	23	15	0.692308	0	0	0	0	0	0	0	0.625	0.714286	1	1
70828393	G	A	A	A	A	A	A	0.5	0.714286	1	1	1	1	6	7	10	13	8	5	0.25	1	0	0	0	0	1	0	1	0	0	0
45577465	A	G	G	G	G	G	G	0.625	0.444444	0.5	0.555556	0.545455	0.642857	16	18	8	9	11	14	0	0	0	0	0	0	0	0.666667	0	0	0.285714	0.4
73412524	T	C	C	C	C	C	C	1	0.333333	0.571429	0.3	0.2	0.555556	23	6	14	10	10	9	0	0	0	0.6	0	0	0	0.4	0	0	0	0
28354167	G	A	A	A	A	A	A	0.328571	0.269231	0.302632	0.213333	0.987013	1	140	78	76	150	77	128	0	0.698795	0	0	0.444444	0	0	0	0	0	0	0
66945222	G	T	T	T	T	T	T	0.533333	0.625	0.5	1	0.538462	1	15	8	10	7	13	25	0.304348	0	0	0	0	0	0	0.571429	1	0.363636	0	0
55046199	A	G	G	G	G	G	G	1	0.846154	1	1	1	0.222222	5	13	5	2	6	9	0	0	0	0	0.666667	0.444444	0	0	0.428571	0.571429	1	0
26461685	T	C	C	C	C	C	C	1	1	0.214286	1	1	1	13	15	42	6	3	8	0	0	0	0	0	0.709677	1	0	0.142857	1	0.405405	0
102697345	A	T	T	T	T	T	T	1	0.2	0.461538	0.215686	0.32	1	17	40	13	51	25	12	0.157303	0	0	0.263158	0	0	0	0.156863	0.196078	0	0.322581	0.148148
73755033	C	T	T	T	T	T	T	0.529412	0.344828	0.666667	0.736842	0.230769	0.625	17	29	6	19	13	16	0	0	0	0	0	0	0	0	0	0.580645	0	0.6
89838588	G	A	A	A	A	A	A	1	0.555556	1	1	1	1	10	9	3	6	4	11	0.555556	1	0	0	0	0.384615	1	0	0	0.666667	0	0
26636145	C	T	T	T	T	T	T	0.538462	0.166667	0.76	1	1	0.25	13	12	25	10	2	8	0	0	0	0	0	0	0	0	1	0.766667	0	0
117183801	C	T	T	T	T	T	T	0.411765	0.666667	0.666667	1	1	1	17	3	3	2	9	11	0	0	1	0.8	0	1	0	0	0	0	0	0
68359248	T	A	A	A	A	A	A	1	1	1	1	1	0.5	2	16	3	8	11	6	0	1	0	0	0	0	0	0	1	0	1	0.555556
35345172	A	G	G	G	G	G	G	0.470588	1	1	1	1	0.2	17	5	11	26	18	10	0.785714	0.782609	0	0.333333	0.428571	0	0.4	0	0	0	0	0
49134223	C	T	T	T	T	T	T	0.5	0.6	0.5	1	1	0.333333	8	5	4	2	2	6	0	0	0	0	0	0	0	0	1	1	0	0
6532008	C	T	T	T	T	T	T	1	0.5	1	1	1	0.428571	4	4	5	4	3	7	1	0	0	1	0	0	1	0	0	0	0	0
44057733	T	C	C	C	C	C	C	1	1	1	1	1	1	7	8	4	2	6	3	0	0	0	0	0.833333	1	0	0	0.571429	1	0	0.666667
44057734	G	A	A	A	A	A	A	1	1	1	1	1	1	6	7	4	2	5	3	0	0	0	0	0.833333	1	0	0	0.571429	1	0	0.666667
20912525	A	G	G	G	G	G	G	1	0.357143	0.6	0.25	0.888889	0.736842	34	14	15	8	9	19	0	0	0	0.571429	0	0	0	0	0	0.666667	0.666667	0
55074401	A	T	T	T	T	T	T	1	1	0.866667	0.52	0.909091	0.45	11	5	15	25	11	20	0.897959	0.939394	0	0.44	0	0	0	0	0	0.541667	0	0
62217098	C	A	A	A	A	A	A	0.73913	1	1	0.512821	0.575758	1	23	25	4	39	33	42	0.363636	0	0.527778	0.58209	0.431818	1	0	0	0	0	0	0
69944349	C	T	T	T	T	T	T	0.3	1	1	0.4	0.714286	0.45	10	4	10	5	7	20	0.75	0	0	0	0.444444	0	0.5	0.25	0	0	0	0
15406837	T	G	G	G	G	G	G	1	1	1	1	1	0.987952	49	37	26	66	32	83	0	0	0.304348	0.315789	0	1	0	0.971014	0.507463	0.414286	0	0.555556
21798101	C	T	T	T	T	T	T	1	0.615385	0.411765	1	1	0.568421	69	91	34	112	102	95	0.64	0	0.682927	0.395062	0.373333	0	0	0	0.585938	0	0	0
27684810	T	C	C	C	C	C	C	0.35	0.75	0.583333	0.269231	0.325	0.218182	20	4	12	26	40	55	0	0	0	0	0	0	0	0	0	0.578947	0	0
42246581	T	C	C	C	C	C	C	0.916667	1	1	1	1	1	12	1	4	6	3	13	0	0	0	0	0	1	0	0	0	1	1	1
107677681	A	G	G	G	G	G	G	0.636364	0.909091	1	0.8	1	0.714286	11	11	5	5	6	7	0.432432	0.5	0	1	0.666667	0	0	0.545455	0	0	0	0
89837568	G	T	T	T	T	T	T	1	0.6	1	1	1	1	13	15	19	12	10	21	0.391304	0	0	0	0	0.428571	0	0.777778	0.714286	1	0	0.375
110998479	C	T	T	T	T	T	T	1	1	1	1	1	0.909091	13	12	4	14	10	11	1	0	0	0	0	0	0	0	1	1	0	1
97228156	A	G	G	G	G	G	G	0.333333	0.736842	0.5	1	0.545455	0.647059	9	19	8	14	11	17	0	0	0	0	0	0	0	1	0.857143	0	0	0
728096	G	A	A	A	A	A	A	0.153846	1	0.6	1	1	0.4	13	10	5	7	10	5	0.6	0.4	0	0	0	0	0	0.75	0	0.5	0	0
43451658	G	A	A	A	A	A	A	0.584906	1	1	0.448276	0.411765	0.981481	53	46	22	29	34	54	0.488372	0	0	0	0	0.692308	0	0.424242	0.47619	0.444444	0	0
59839660	T	C	C	C	C	C	C	0.4	1	1	1	0.5	1	5	2	1	2	4	11	0.5	0	0	0	1	0	0	0	0.5	0	1	0
6860750	T	G	G	G	G	G	G	0.833333	1	0.4	1	1	0.583333	18	10	10	9	8	12	1	0.5	0	0	0	0	0	0	0	0.583333	0.833333	0
60502041	C	T	T	T	T	T	T	1	1	0.8	0.5	1	0.6	15	5	5	6	3	5	0	0	0	0	1	0	0	1	1	0	0	0
112525091	C	T	T	T	T	T,A	T	0.230769	0.545455	0.25	0.45283	1	1	13	44	8	53	11	11	0.444444	0.35	0	0	0.333333	0	0	0	0	0	0	0.454545
22843799	G	A	A	A	A	A	A	0.477273	0.576923	1	0.622222	1	0.507042	44	26	10	45	39	71	0	0	0	0	0.30303	0.52381	0.451613	0.411765	0	0	0.6	0
22531485	C	A	A	A	A	A	A	1	1	1	1	1	1	66	64	40	66	69	105	0	0.695122	0	0	0	0.988506	0.566265	0.424242	0.439024	0	1	0
114320629	T	A	A	A	A	A	A	1	1	1	0.5	1	1	3	12	10	6	9	15	0.45	0	0.666667	1	0	0	0	0	0	0	0.5	1
59816122	C	G	G	G	G	G	G	1	1	0.666667	1	1	0.666667	77	55	63	59	60	123	0.59542	0	0.619883	0.60241	0.513274	0	0	0	0	0.594595	0	0.525424
77953368	T	C	C	C	C	C	C	1	1	1	1	1	1	14	7	10	6	11	14	0	0	0	0	0.52381	0.666667	0.555556	0.8	0.823529	0.25	0	0.5
70518630	G	A	A	A	A	A	A	1	1	1	1	1	0.65	20	31	10	15	12	20	0	1	0.611111	0.62069	0.590909	0.311111	0	0	0	0.636364	0	0
113527902	A	G	G	G	G	G	G	0.428571	0.444444	1	1	0.833333	1	7	9	4	10	12	10	1	0	0	0	0.8	0	0	0	0.428571	0.6	0	0
75493695	G	A	A	A	A	A	A	0.3	1	1	1	1	0.583333	30	33	11	15	13	24	0	0	0	0.5	0	1	1	0	0	0.172414	0.333333	0
25559437	C	T	T	T	T	T	T	0.833333	1	1	1	1	0.416667	18	6	2	4	7	12	1	0	1	1	0	0	0.375	0	0	0	0	0
1491187	T	C	C	C	C	C	C	1	1	1	1	1	1	2	4	5	5	5	4	1	0	0	0	0	0.625	0	0	1	0.5	0	1
102697303	G	C	C	C	C	C	C	1	0.322581	0.388889	0.25	0.354839	1	34	62	18	60	31	25	0	0	0.173913	0.255102	0.232877	0	0	0.163934	0.238806	0	0.210526	0.166667
50548641	C	G	G	G	G	G	G	1	0.75	1	1	1	0.5	63	72	11	21	7	8	0	0	0	0	0.5	0.344828	0	1	1	0	0.531915	0
70518642	T	C	C	C	C	C	C	1	1	1	1	1	0.608696	21	30	9	18	14	23	0	1	0.631579	0.655172	0.565217	0.339623	0	0	0	0.548387	0	0
61159293	T	C	C	C	C	C	C	0.25	0.375	1	0.875	1	1	12	16	4	8	32	18	0.181818	0	0	0	0.4	0	0	0	0.5	0.75	0	0.8
2649337	T	C	C	C	C	C	C	0.5	1	1	1	1	0.541667	10	8	7	11	3	24	0.72	0.590909	0.5	0.40625	0	0	0	0.545455	0.411765	0	0	0
13080260	C	A	A	A	A	A	A	1	1	1	1	1	1	3	5	13	2	7	6	0.333333	0	0	0.8	1	0	0	0	0	1	0	1
86975920	G	A	A	A	A	A	A	0.571429	0.571429	1	0.222222	1	0.5	7	7	3	9	2	4	0	1	1	0	0	0	0	0	0	0	0	0
13832902	C	G	G	G	G	G	G	0.473684	0.457831	0.612245	0.656716	0.5	0.581395	76	83	49	67	60	129	0	0	0.402778	0.552632	0	0	0	0	0	0.461538	0	0
14741956	T	A	A	A	A	A	A	0.291262	1	1	0.993506	0.989305	0.99187	103	216	73	154	187	123	0	0.408654	0	0	0	0	0	0.5625	0.99723	0.992424	0	0.440476
44838903	T	A	A	A	A	A	A	0.444444	1	1	1	0.4	1	9	3	2	7	5	5	0	0	0	0.428571	0	0.333333	0	0	0	1	0.818182	0.4
113606717	G	A	A	A	A	A	A	1	0.380952	0.666667	1	0.866667	0.470588	21	21	3	43	45	17	0	0.4	0	0	1	0	0.428571	0	0	0	0.692308	0
44753701	C	T	T	T	T	T	T	1	1	1	1	0.363636	1	2	3	2	2	11	8	0	1	1	0	0	1	0	0	0	0	0	0.5
34669527	T	C	C	C	C	C	C	0.333333	0.454545	0.291667	1	1	1	24	11	24	6	2	22	1	0	0.5	0.454545	0	0	0	0	0.266667	0	0	0
27684874	C	T	T	T	T	T	T	0.4375	0.428571	0.555556	0.294118	0.457143	0.392857	16	7	18	17	35	56	0	0	0	0	0	0	0	0.375	0	0.333333	0	0
24891922	T	C	C	C	C	C	C	1	1	1	1	0.857143	1	4	4	2	2	7	4	0	1	0	1	1	1	0	0	0	0	0	0
7052719	A	G	G	G	G	G	G	0.857143	1	1	1	1	1	7	4	10	3	7	6	0	1	0	0	1	0	1	0	1	0	0	0
69944807	A	C	C	C	C	C	C	0.222222	1	1	0.333333	0.545455	0.4	18	7	35	12	11	30	0.461538	0	0	0	0.583333	0	0.4	0	0	0.2	0	0
5780440	A	C	C	C	C	C	C	0.541667	0.7	0.422222	1	0.884615	0.75	24	10	45	3	26	8	0	0	0	0.857143	0	0	0	0	0.866667	0.210526	0.509434	0
44812433	G	A	A	A	A	A	A	0.6	1	1	1	1	0.666667	10	6	30	5	7	6	0	0	1	0	0	0	0	0	0.666667	1	0.75	0
18029435	G	T	T	T	T	A	A	0.26	0.294118	0.219512	0.377778	1	0.555556	50	68	41	45	3	9	0	0.323077	0	0	0	0	0	0.272727	0.264706	0	0	0
113527916	C	T	T	T	T	T	T	0.375	0.5	1	1	0.769231	1	8	12	3	11	13	9	1	0	0	0	0.8	0	0	0	0.5	0.5	0	0
83824816	T	A	A	A	A	A	A	1	1	1	1	0.941176	0.413793	16	18	5	13	17	29	0	0	0	0	0.25	0.571429	0.913043	0.473684	0.30303	0	0	1
56520198	G	A	A	A	A	A	A	1	1	1	1	0.333333	1	6	4	2	8	6	10	0	0.875	0	0	0.571429	0	0	0.571429	0	0.473684	0	1
110110118	T	C	C	C	C	C	C	0.388889	1	0.6	0.5	0.454545	0.702703	18	14	10	16	11	37	0	0	0	0	0.304348	1	0	0	0	0.5	0	0
89596944	G	C	C	C	C	C	C	1	1	1	0.833333	0.333333	0.5	3	3	2	6	6	4	0	0.428571	0	0	0	0	0	0	0.8	0	1	0.6
83824819	A	C	C	C	C	C	C	1	1	1	1	0.9375	0.413793	17	16	4	13	16	29	0	0	0	0	0.25	0.538462	1	0.444444	0.28125	0	0	1
109391791	C	G	G	G	G	G	G	0.37	0.520833	0.430556	1	0.538462	0.387755	100	96	72	122	104	98	0	0	0.5	0.461538	0	0	0	0	0	0.45082	0	0
34209284	G	A	A	A	A	A	A	0.5	1	1	1	1	0.333333	4	8	13	7	4	6	0	0	0	0	1	0	0	0	0	1	1	0
23653995	T	G	G	G	G	G	G	1	1	1	1	1	0.333333	3	3	7	2	4	6	0	1	1	0	1	0	0	0	0	0.5	0	0
947114	C	A,T	A	A	A	A	A	1	0.5	1	1	1	1	8	10	2	2	5	6	0	0	0	0	0	1	0	0	0	0.666667	1	1
34663051	G	A	A	A	A	A	A	1	0.833333	1	1	1	1	8	6	11	3	3	11	1	0	0	0	0	1	0	0	1	1	0	0
23081263	T	C	C	C	C	C	C	0.833333	1	1	1	1	1	6	6	4	2	3	2	1	0	1	1	0	0	0	0	0	0	1	0
63334609	T	C	C	C	C	C	C	0.75	0.583333	0.5625	1	1	0.6	4	12	16	9	4	10	0	0	0	0	0	0	0.818182	0	0	0.444444	0.4	1
112289185	T	C	C	C	C	C	C	0.75	0.636364	1	0.666667	1	0.5	8	11	10	6	6	8	0	0	0.363636	0.3	0	0.642857	0	0	0.75	0	0.666667	0
83824796	C	T	T	T	T	T	T	1	1	1	1	0.944444	0.419355	18	24	4	21	18	31	0	0	0	0	0.210526	0.411765	1	0.5	0.411765	0	0	1
78643882	A	G	G	G	G	G	G	0.307692	0.4	0.5	0.615385	0.875	0.291667	13	10	4	13	16	24	0.384615	0	0	0	0.411765	0	0	0	0	0	0.363636	0
25861405	C	A	A	A	A	A	G	0.145161	0.265487	0.314286	0.263736	0.666667	1	124	113	35	364	105	250	0.198649	0	0	0	0	0	0.3	0	0	0	0	0.33101
21798280	G	A	A	A	A	A	A	1	0.5	0.447368	1	1	0.510417	111	94	38	148	117	96	0.608871	0	0.369565	0.589147	0.527778	0	0	0	0.540698	0	0	0
44057730	A	G	G	G	G	G	G	1	1	1	1	1	1	7	9	4	4	6	3	0	0	0	0	0.857143	1	0	0	0.571429	1	0	0.75
22531710	T	C	C	C	C	C	C	1	1	1	1	1	1	36	35	20	29	29	72	0	0.5	0	0	0	1	0.673077	0.533333	0.472727	0	1	0
59589241	G	A	A	A	A	A	A	0.8	1	1	0.642857	0.44	0.388889	10	12	23	14	25	18	0	0.285714	0	0	0	0	0	0	1	0.666667	0	0.5
930394	T	C	C	C	C	C	C	1	0.818182	1	1	1	1	6	11	6	2	3	5	1	0	0	0	0	1	1	0	0	0	1	0
27684519	G	A	A	A	A	A	A	0.416667	0.333333	0.851064	0.413793	0.454545	0.4	12	12	47	29	33	75	0	0	0	0	0	0	0	0.666667	0	0.386364	0	0
39095287	G	C	C	C	C	C	C	1	1	1	0.5	1	0.571429	10	2	4	4	3	14	0	0	0	0	0	0	1	0	1	0.857143	0.4	0
9784426	C	T	T	T	T	T	T	1	1	0.411765	0.5	1	1	11	19	17	14	5	18	0.4	0	0	0	0	1	0	1	0	0.285714	0.411765	0
7841409	G	A	A	A	A	A	A	0.375	0.387097	0.607143	0.466667	0.25	0.478261	16	31	28	15	12	23	0	0	0	0	0	0	0.391304	0	0	0	0	0.363636
86835832	T	G	G	G	G	G	G	0.5	0.714286	0.8	1	1	0.461538	4	7	5	2	2	13	0	0	0	1	0	0	0	0	1	0.666667	0	0
6171582	A	G	G	G	G	G	G	1	0.25	1	1	1	1	8	8	5	6	3	7	0	0	1	1	0	0	0	0	0	0.3	0.545455	0.6
112289196	C	A	A	A	A	A	A	0.75	0.692308	1	0.5	1	0.6	8	13	9	8	8	10	0	0	0.307692	0.3	0	0.714286	0	0	0.75	0	0.666667	0
86721873	C	A	A	A	A	A	A	1	1	0.8	1	1	1	5	6	5	4	2	2	0	0	0	1	0	0	0	0	1	1	1	0
24710548	A	T	T	T	T	T	T	0.8	1	1	1	1	1	5	2	8	3	6	2	1	1	1	1	0	0	0	0	0	0	0	0
17235231	T	C	C	C	C	C	C	0.555556	0.666667	0.375	1	0.166667	0.285714	9	3	8	2	12	7	1	0	0	0	0	0	0	0	0	0	0.25	0
75508300	C	T	T	T	T	T	T	0.475	1	1	1	1	0.460317	120	73	63	37	20	63	0	0.5	0.466667	0.631579	0	0.416667	0.333333	0	0	0.153846	0.636364	0
74393311	T	G	G	G	G	G	G	1	1	1	1	1	0.545455	2	6	2	2	4	11	1	0	0	0	1	0	0	0	0	0	1	0.75
5826010	A	G	G	G	G	G	G	1	1	0.545455	1	1	1	48	5	11	4	10	11	0	0	0	0	0	0	0.75	0	0.555556	0.444444	1	1
87269747	G	C	C	C	C	C	C	0.4	0.642857	1	0.708333	1	0.7	25	14	5	24	12	20	0	0	0.555556	0.814815	0.285714	1	0	0	0	0	0	0
83824813	C	T	T	T	T	T	T	1	1	1	1	0.941176	0.4	16	15	5	13	17	30	0	0	0	0	0.25	0.5	1	0.473684	0.322581	0	0	1
42597510	G	A	A	A	A,C	A	A,T	1	1	1	1	1	1	9	3	3	11	4	8	0	0	0	1	0.666667	0	0	0	0.538462	0	1	1
30304204	A	C	C	C	C	C	C	0.7	0.5	0.666667	0.692308	1	1	10	12	3	13	5	7	0.666667	0.5	0	0	0	0	0	1	0	0.6	0	0
6884	C	A	A	A	A	A	A	1	0.538462	0.473684	0.944444	0.428571	1	22	13	19	18	14	29	0	0.9375	0	0	0	0	0.533333	0	0	0	0.333333	0.789474
113619534	A	C	C	C	C	C	C	1	0.75	0.666667	1	1	0.384615	27	24	12	54	55	26	0	0.709677	0	0	1	0.333333	0	0	0.684211	0.285714	0	0
39659729	G	A	A	A	A	A	A	1	0.818182	0.785714	0.714286	1	1	4	11	14	7	7	8	0	1	0.666667	0.2	0.666667	0	0	1	0	0	0	0
96580536	T	C	C	C	C	C	C	1	1	1	1	0.666667	0.2	7	11	3	3	3	10	0	0.368421	0.714286	1	1	0	0	0	0	0	0	0
57198652	T	A	A	A	A	A	A	1	1	0.785714	1	0.692308	1	8	11	14	3	13	11	0	0.346939	0.470588	0.5625	0.5	0	0.414634	1	0	0	0	0.4
62222766	C	T	T	T	T	T	T	0.714286	1	0.6	0.75	0.466667	0.428571	14	6	5	4	15	14	0.625	0	0	0	0	0.727273	0	0	0	0	0	0.833333
59951530	C	T	T	A	A,T	T	A	0.6	0.461538	0.407407	0.8	0.333333	0.6	10	13	27	5	9	10	0	1	0	0	0	0	0	0	0	0.428571	0	0
51272255	T	C	C	C	C	C	C	1	0.636364	0.333333	0.5	0.714286	0.875	6	11	6	4	7	8	0	0	0.857143	0	0	0	0	0	1	0	0	0.428571
136692640	C	T	T	T	T	T	T	0.333333	1	1	1	1	0.6	6	2	6	6	14	5	1	1	0	0	0.666667	0	0	0	0	0.5	0	0
76545697	T	C	C	C	C	C	C	0.6	0.6875	1	1	1	0.407407	10	16	20	11	16	27	0.457143	0.368421	0	0	0.25	0.470588	0	0	0.68	0.705882	0	0
114320666	A	G	G	G	G	G	G	1	1	1	0.454545	1	1	5	7	9	11	8	12	0.692308	0	1	1	0	0	0	0	0	0	0	1
20577264	C	T	T	T	T	T	T	0.833333	1	1	1	0.4	0.8	6	3	3	3	5	5	1	1	0	0.666667	0.272727	0	0	0.333333	0	0	0	0
35597754	A	G	G	G	G	G	G	0.487207	0.998584	0.578249	0.519608	0.506699	0.503	938	3531	377	816	1642	3167	0.515254	0	0	0	0	0	0	0	0.361404	0.49631	0.465677	0
41322508	A	G	G	G	G	G	G	0.714286	1	1	1	1	1	7	2	6	16	5	4	0.384615	1	1	0	0	0	0	1	0.375	0	0.2	0
117177323	T	C	C	C	C	C	C	0.553571	0.590164	0.575	1	1	1	56	61	80	11	13	46	0	0	0.46875	0.592593	0.571429	1	0	0.333333	0	0	0	0
35148082	C	T	T	T,G	T	T	T	1	1	1	1	1	1	9	20	10	11	13	11	0	0.166667	1	1	1	0	0.705882	0.375	0	0	0	0
49722691	C	T	T	T	T	T	T	1	0.666667	1	1	1	0.461538	18	12	4	7	4	13	0	0	0.285714	0	0.357143	0	0.666667	0	1	0	0.666667	0.4
1322212	C	T	T	T	T	T	T	1	1	1	1	1	0.428571	18	24	2	43	33	28	1	0.8	0	0	0.35	0	0	0.393939	0.285714	0.5	0	0.347826
141274345	A	G	G	G	G	G	G	1	0.666667	1	1	0.454545	0.8	2	6	12	6	11	5	0.285714	0	0	1	0	0	0	0.384615	0.5	0	0	1
5030342	G	T	T	T	T	T	T	0.666667	0.428571	0.8	0.3	0.25	0.5	3	7	5	10	16	16	0.333333	0.416667	0	0	0	0	0	0	0.444444	0	0	0
57318122	T	A	A	A	A	A	A	1	1	1	1	1	0.75	4	3	3	2	13	4	1	0	0	1	0	0	0	0	1	1	0	0
70459603	A	C	C	C	C	C	C	1	0.75	1	1	1	1	5	4	8	2	2	4	0	0	0	0	1	1	0	0	0	1	1	0
42965083	A	G	G	G	G	G	G	1	1	1	1	1	1	13	2	10	8	7	13	0	0.75	0.25	0	0	1	0	0.75	0	0.5	1	0
67626851	A	G	G	G	G	G	G	1	0.428571	1	1	1	1	14	14	3	7	10	23	1	0	0.407407	0.9	0.548387	0	0	0.181818	0	0	0	0.642857
114320680	G	A	A	A	A	A	A	1	1	1	0.461538	1	1	6	9	7	13	9	11	0.714286	0	1	1	0	0	0	0	0	0	0	1
65448714	C	A	A	A	A	A	A	0.4	0.285714	0.75	0.4	0.444444	0.2	5	7	4	5	9	15	0	0	0	0	0	0	0	0.4	0.333333	0	0	0
28333620	T	C	C	C	C	C	C	0.982456	0.972973	1	1	0.929134	0.971429	57	37	8	121	127	280	0	0.982456	0	0	0	0.472826	0.384615	0.391304	0.745098	0.830508	0	0.305556
24269672	T	C	C	C	C	C	C	1	1	1	1	1	1	5	2	4	3	3	2	0	0	0.285714	0	0.6	0.571429	0	0	0.8	1	1	0
6168426	T	C	C	C	C	C	C	1	1	0.571429	1	0.555556	1	5	3	7	5	9	9	0	0	0	0.388889	1	1	0	0	0	0	0	1
35345406	C	A	A	A	A	A	A	0.625	1	1	1	1	0.571429	16	7	4	27	15	7	0.6	0.482759	0.625	0.653846	0.45	0	0.647059	0	0	0	0	0
117177156	A	G	G	G	G	G	G	0.489712	0.515695	0.554688	1	1	1	243	223	256	96	49	141	0	0	0.285714	0.39759	0.525	1	0	0.615385	0	0	0	0
55004589	G	A	A	A	A	A	A	1	0.333333	1	1	1	0.5	4	6	20	6	2	4	1	0	0	0	0	0.625	0	0	0	0.722222	0.75	0
45473760	A	G	G	G	G	G	G	0.473684	0.458333	0.25	0.294118	0.8	0.5	38	24	28	17	5	20	0	0	0.352941	0.333333	0	0	0	0	0.2	0.153846	0	0
110875721	G	A	A	A	A	A	A	0.266667	1	1	1	1	1	15	16	2	14	11	21	0	0	1	0.466667	0.478261	0.1875	0	0	0.352941	0	0.5	0.545455
126232848	T	C	C	C	C	C	C	0.6	0.6	0.666667	1	0.166667	0.5	5	5	3	5	12	6	0	0	0	0	0	0.8	0	0	0	1	0	0
31538643	A	G	G	G	G	G	G	1	0.588235	1	0.5625	1	0.516129	97	51	77	16	18	62	0.75	0	0	0	0	0	1	0	0.484848	0	0.7	0
49618298	G	A	A	A	A	A	A	1	0.815789	0.285714	0.428571	0.764706	1	32	38	7	14	17	20	0	0	0.888889	0.678571	0	0	0	1	0	0	0	0
83824538	A	C	C	C	C	C	C	1	1	1	1	1	0.470588	7	12	2	2	26	17	0	0	0	0	0.352941	0.636364	1	0.5	0.258065	0	0	1
83824537	A	G	G	G	G	G	G	1	1	1	1	1	0.470588	7	11	2	2	27	17	0	0	0	0	0.333333	0.636364	1	0.521739	0.258065	0	0	1
140119606	G	T	T	T	T	T	T	0.5	1	1	1	1	1	14	12	2	13	20	24	0	0	0.75	0.416667	0	0.75	0.5	1	0	0	0.363636	0
102697370	T	C	C	C	C	C	C	1	0.235294	0.666667	0.227273	0.4	1	16	34	9	44	25	17	0.205128	0	0	0.304348	0.261905	0	0	0.148936	0.333333	0	0.37931	0.181818
34669543	G	T	T	T	T	T	T	0.37037	0.428571	0.275862	1	0.333333	1	27	14	29	10	6	20	0.666667	0	0.428571	0.363636	0	0	0	0	0.235294	0	0	0
62554088	T	A	A	A	A	A	A	1	1	1	1	1	1	8	14	28	8	13	16	0	1	0.714286	0	0	0.576923	0	0	0	1	1	0
63819454	T	C	C	C	C	C	C	1	1	1	1	0.375	0.333333	2	8	14	5	8	6	1	0	0	0	0	0	0	0	1	0	1	0
119634083	T	C	C	C	C	C	C	0.345238	1	1	1	0.424242	0.534247	84	105	60	83	33	73	0	0	0	0	0.490909	0	0.602273	0.416667	0	0.536082	0.551282	0
35670935	A	G	G	G	G	G	G	0.555556	1	1	1	1	0.75	9	3	2	4	2	8	0	1	0	0	0	0	1	0	0.6	0	0	1
112289193	C	T	T	T	T	T	T	0.75	0.692308	1	0.5	1	0.555556	8	13	9	8	8	9	0	0	0.363636	0.3	0	0.714286	0	0	0.75	0	0.666667	0
58417081	C	T	T	T	T	T	T	0.636364	0.785714	1	0.666667	1	0.375	11	14	9	6	10	8	0	0	0	0	0	0.692308	0	0	0.375	0.473684	0.636364	0.583333
10652930	A	T	T	T	T	T	T	0.75	1	1	0.857143	0.666667	0.857143	4	5	2	7	3	7	0	0	0.428571	0	0	0	0	0.833333	1	0	0.666667	0.5
34356459	A	G	G	G	G	G	G	0.454545	0.25	0.75	0.714286	0.833333	0.357143	11	8	4	7	6	14	0.272727	0	0	0.384615	0	0	1	0	0	0	0	0
60318883	C	T	T	T	T	T	T	0.272727	0.714286	1	0.384615	1	0.818182	11	7	2	13	9	11	0.416667	0	0	0	0.307692	0	0	0.714286	0.6	0.45	0	0
40806460	G	A	A	A	A	A	A	1	1	1	1	1	0.7	6	4	7	4	3	10	1	1	1	1	0	0	0	0	0	0	0	0
24690981	G	A	A	A	A	A	A	1	1	1	1	1	1	2	2	2	2	6	3	1	0	0	1	0	0.3	0	1	0	0	0	1
94622206	C	T	T	T	T	T	T	1	1	1	1	1	1	7	7	9	2	3	3	0	0	1	0	0	1	1	0	0	0.8	0.5	0
28573483	T	A	A	A	A	A	A	1	1	0.6	1	0.5	1	2	2	5	4	8	2	0	1	1	1	0	0	0	0	0.4	0	0	0
99363340	G	T	T	T	T	T	T	0.178571	0.515152	0.352941	0.235294	0.8	1	28	33	17	17	5	4	0	0	0	0	0	0.478261	0	0.571429	0	0	0	0.333333
114323823	A	T	T	T	T	T	T	1	1	1	0.285714	1	1	5	2	6	7	7	11	0.588235	0	0	1	1	0	0	1	0	0	0	0
117163605	C	T	T	T	T	T	T	0.411765	0.444444	0.533333	1	1	1	17	18	15	11	17	18	0	0	0.692308	1	0	0	0	1	0	0	0	0
41414998	A	T	T	T	T	T	T	0.363636	1	1	1	0.333333	1	4	3	3	3	6	4	1	0	1	1	0	0	0	0	0	0	0	0
117177226	A	G	G	G	G	G	G	0.484848	0.442478	0.508333	1	1	1	132	113	120	45	25	73	0	0	0.46	0.444444	0.411765	1	0	0.423077	0	0	0	0
3250756	T	C	C	C	C	C	C	1	1	1	1	1	1	3	3	2	2	4	9	0.307692	1	0	0	0	0	0	0	1	1	0	1
75422856	C	G	G	G	G	G	G	0.5	1	1	1	1	1	6	5	3	5	3	6	0	1	0.666667	0.363636	0.444444	1	0.333333	0	0	0	0	0
7841900	C	T	T	T	T	T	T	0.3	0.222222	0.714286	0.411765	0.333333	0.375	20	18	28	17	6	16	0	0	0	0	0	0	0	0	0	0	0	0.666667
47296042	G	A	A	A	A	A	A	0.4375	1	0.75	1	0.4	0.423077	16	4	16	4	10	26	0.384615	0	0	0.391304	0	0.545455	0	0	1	0	0	0
3355191	G	A	A	A	A	A	A	1	0.470588	0.32	1	0.714286	0.333333	16	17	25	3	7	18	0.466667	0.647059	0	0	0	0.636364	0	0	0	0.4	0	0
53095707	T	C	C	C	C	C	C	1	1	0.6	0.25	0.444444	1	7	3	10	8	9	4	0.6	0.411765	0	0	0	0	0	0	0	0	1	0.6
5876073	T	C	C	C	C	C	C	0.666667	0.25	0.285714	0.684211	0.971014	1	39	8	28	19	69	63	0	0	0	0	0	0	0	0	0.756757	0	1	0.421053
11148758	A	G	G	G	G	G	G	0.6	1	1	1	1	1	10	2	16	4	7	21	0	0	0	0	0	0	1	0	0.444444	1	0.47619	1
10275739	A	T	T	T	T	T	T	0.666667	0.571429	0.44	1	1	1	4	7	25	7	6	13	0	0	0	0	1	1	0	0	0	0	1	0
36989558	T	C	C	C	C	C	C	0.363636	1	1	1	0.833333	1	11	6	19	11	6	24	0.962963	0	0	0	0	0.411765	0	0	0.7	0	0.444444	1
24875912	C	T	T	T	T	T	T	1	1	1	1	1	1	14	11	4	19	10	3	1	0.555556	0	1	0	0	0	0	0.769231	0	0	1
35147930	C	T	T	T	T	T	T	1	1	1	1	1	1	9	11	9	7	6	9	0	0.555556	0.357143	0.888889	1	0	0.666667	0.857143	0	0	0	0
1322213	T	G	G	G	G	G	G	1	1	1	1	1	0.413793	17	24	2	42	33	29	1	0.842105	0	0	0.35	0	0	0.441176	0.275862	0.5	0	0.333333
48533973	T	C	C	C	C	C	C	0.363636	0.533333	0.333333	1	0.6	1	22	15	6	33	30	20	0	0	0	0	0.566667	0	0	0.521739	0.5	0	0.571429	0
110373712	A	G	G	G	G	G	G	0.487179	1	1	1	1	1	39	20	8	21	21	48	0.6	0	0.380952	0.372093	0	0.5	0.28125	0	1	0.428571	0	0.257143
43919907	A	C	C	C	C	C	C	1	1	1	1	1	0.666667	2	4	7	2	5	6	0	0	0	0	0	1	1	0	0	0	1	1
12404135	G	A	A	A	A	A	A	0.5	1	1	1	0.666667	1	4	3	4	4	3	4	0.8	0.7	0	0	0	0	0	0	1	0	1	0
105271220	A	G	G	G	G	G	G	1	1	1	0.5	1	1	2	3	3	4	6	2	0	0	0	1	1	0	0	0	0	1	0	0.833333
7778591	T	A	A	A	A	A	A	1	1	1	0.666667	1	1	16	8	7	3	4	9	0	0	0	0	0	0	1	0	1	1	0	1
31927583	G	T	T	T	T	T	T	1	1	1	0.666667	1	1	2	9	13	3	7	6	1	0	0	0	0	1	0	0	1	0	1	0
114320620	C	T	T	T	T	T	T	1	1	1	0.666667	1	1	2	8	10	6	10	17	0.5	0	1	1	0	0	0	0	0	0	0.5	1
41372143	A	G	G	G	G	G	G	1	0.666667	1	1	1	1	3	6	11	5	3	3	0	0	0	1	0	1	0	0	0	1	1	0
7778721	T	A	A	A	A	A	A	1	1	1	1	1	1	11	9	9	3	5	5	0.333333	0	0	0	0	1	0	0	1	1	0	1
24710585	A	C	C	C	C	C	C	1	1	1	1	1	1	9	2	12	3	9	2	1	0	1	1	0	0.333333	0	0	0	0	1	0
7603982	A	C	C	C	C	C	C	1	1	1	1	1	1	5	3	6	4	4	2	0	0	0	1	1	0	1	0	0.333333	0	1	0
81888696	G	A	A	A	A	A	A	1	1	1	1	1	1	2	6	3	9	6	8	0	0	0	0.666667	1	1	1	0	0	0.666667	0	0
22843818	A	T	T	T	T	T	T	0.473684	0.5	1	0.606061	1	0.508475	38	14	12	33	25	59	0	0	0	0	0.387097	0.484375	0.606061	0.411765	0	0	0.535714	0
36860708	T	C	C	C	C	C	C	1	0.444444	1	0.545455	0.391304	1	35	9	2	11	23	30	0.611111	0	0	0	0	0	0.583333	0.166667	0	0	0.357143	1
66650314	C	T	T	T	T	T	T	1	1	1	1	1	1	3	10	16	8	18	32	0	1	0	0	1	0	0	1	0.538462	0.5	0.3	0
157957	A	T	T	T	T	T	T	1	0.473684	1	1	0.333333	1	7	19	22	4	6	16	0.666667	0	0	0	0	0.6	0.170213	0	0	0.153846	0.555556	1
30127670	T	C	C	C	C	C	C	1	0.8	1	1	1	0.857143	5	5	3	3	5	7	0	0	1	1	0	0	1	1	0	0	0	0
103870552	C	T	T	T	T	T	T	0.453125	1	0.552632	0.486111	0.425743	0.487395	64	72	76	72	101	119	0.456311	0	0	0	0.476923	0	0.301887	0	0	0	0.513514	0
117177229	A	G	G	G	G	G	G	0.46875	0.422018	0.508475	1	1	1	128	109	118	45	24	73	0	0	0.411765	0.472222	0.4375	1	0	0.423077	0	0	0	0
66179399	G	C	C	C	C	C	C	1	1	1	0.454545	1	1	3	9	3	11	6	9	0	0.6	0	0.6	0	0	0	1	1	0	0	0.6
45670904	G	A	A	A	A	A	A	0.714286	1	0.25	1	1	1	7	13	8	6	11	12	0.3	0	0	0	0.222222	1	0	0.25	0.555556	0	0.538462	0.444444
62953806	G	T	T	T	T	T	T	0.421053	0.416667	0.333333	1	1	0.1875	19	24	6	20	7	16	0	0.304348	0	0	0	0.318182	0	0	0.3	0	0.785714	0
32919587	G	A	A	A	A	A	A	0.75	0.9	1	1	1	1	4	10	4	5	7	5	0	1	0	1	0	1	0	0	0	1	0	0
17517644	A	G	G	G	G	G	G	0.5	1	0.8	0.666667	0.75	0.5	2	2	10	3	4	2	0	0	0	0	1	0	0	0	0.5	0.666667	0.4	0
34641038	C	T	T	T	T	T	T	0.526316	1	1	0.526316	0.666667	1	38	32	45	19	3	24	0	0.8	0	0	0	0.434783	0	0	0	0.433333	0.407407	1
29627149	G	A	A	A	A	A	A	0.764706	1	0.6875	0.25	1	0.823529	17	12	16	28	9	17	0	0.590909	0	0	0.3	0.391304	0	0	0.295455	0.95	0.357143	0
83825388	A	C	C	C	C	C	C	1	1	1	1	1	0.272727	26	19	32	33	16	33	0	0	0	0	0.5	0.3	0.971429	0.473684	0.387755	0	0	1
45437470	G	C	C	C	C	C	C	1	1	1	1	1	1	4	2	4	5	7	12	0	0	0	0	0	0.666667	1	0.444444	0.25	0	1	1
13388808	T	C	C	C	C	C	C	0.333333	0.4	1	0.375	0.444444	0.285714	6	5	2	8	9	7	0	0.2	0	1	0	0	0	0	0	0	0	0
146518661	T	C	C	C	C	C	C	0.666667	1	1	1	0.272727	1	3	4	6	4	11	14	0	1	0	0.588235	0	0	0	0	0.714286	0	1	0
52419373	T	C	C	C	C	C	C	0.987421	1	1	1	1	1	159	150	62	107	114	119	0	0	0	0	1	0.527778	0	0.493506	0.479452	0.407407	0.465347	0.978261
14393835	G	A	A	A	A	A	A	1	0.666667	0.5	0.5	0.666667	0.3	16	24	6	20	18	20	0	1	0	0	1	0	0	0	0	0	0	0
21796247	C	T	T	T	T	T	T	1	1	1	1	1	1	5	2	3	4	14	7	0.933333	0	0.6	0	0.833333	0	0	0	1	0	1	0
1577835	A	G	G	G	G	G	G	0.64	0.588235	1	1	1	1	25	17	6	27	25	36	0.625	0	0	0	1	0.703704	0	0	0.666667	0	0.6	0
59710013	G	T	T	T	T	T	T	0.782609	0.925926	0.802817	1	0.818182	0.636364	69	27	71	23	11	33	0	0.571429	0	0	0	1	0	1	0.761905	0	0	0
112289200	C	T	T	T	T	T	T	0.75	0.692308	1	0.555556	1	0.6	8	13	11	9	8	10	0	0	0.333333	0.315789	0	0.733333	0	0	0.857143	0	0.727273	0
27684926	A	G	G	G	G	G	G	0.615385	0.5	0.48	0.2	0.517241	0.462963	13	8	25	25	29	54	0	0	0	0	0	0	0	0.666667	0	0.481481	0	0
61091252	A	G	G	G	G	G	G	1	0.785714	0.583333	0.666667	0.571429	1	19	14	36	12	7	22	0.434783	0	0	0	1	0	0	0	0.545455	1	0	0
17058625	T	G	G	G	G	G	G	0.571429	0.8	0.454545	0.5	0.666667	0.3	14	20	11	4	6	10	0	0	0	0	0	0	0	0	0	0.666667	0	1
83561639	G	C	C	C,A	C	C	C	1	1	1	1	1	0.375	17	11	11	3	2	8	0	0	1	0	1	0	0.75	0	0	0	1	0
102697275	T	C	C	C	C	C	C	1	0.369231	0.333333	0.4	0.4	1	43	65	24	50	25	33	0	0	0.222222	0.314286	0.19403	0	0	0.315789	0.295775	0	0.193548	0.342857
74525763	T	C	C	C	C	C	C	1	1	0.368421	1	1	0.444444	10	15	19	20	3	9	0	1	0.678571	0.391304	0.333333	0	0.285714	0	0	0	0.5	0
11162830	C	A	A	A	A	A	A	1	0.947368	0.619048	1	0.694444	1	13	38	21	22	36	51	0.376623	0.692308	0.63	0.531034	0.461538	0	0	0	0	0	0.631579	0.314286
42959610	G	A	A	A	A	A,T	A	1	1	1	1	1	1	6	17	11	24	9	9	0	0.375	0.285714	0	0	1	1	0.428571	0.578947	0.285714	0.428571	0
83824386	A	G	G	G	G	G	G	1	1	1	1	1	0.473684	8	11	9	23	19	19	0	0	0	0	0.733333	0.428571	1	0.461538	0.233333	0	0	1
46482721	G	T	T	T	T	T	T	1	1	1	0.6	0.333333	1	6	5	10	5	6	8	0	0	0.4	0.916667	0	1	0	1	0	0	0	0
117177107	T	C	C	C	C	C	C	0.502008	0.561576	0.529412	1	1	0.984733	249	203	272	74	46	131	0	0	0.330357	0.45283	0.585366	1	0	0.592593	0	0	0	0
28505783	C	T	T	T	T	T	T	0.697897	0.591022	0.673077	0.620847	1	1	1046	401	156	1535	597	162	0.566852	0	0	0	0.213768	0.99619	0.223464	0	0	0.729548	0	0.236585
17235229	T	C	C	C	C	C	C	0.555556	1	0.375	1	0.333333	0.571429	9	3	8	2	12	7	1	0	0	0	0	0	0	0.5	0	0.5	0.222222	0
53685029	C	T	T	T	T	T	T	0.5	0.5	1	1	0.8	0.684211	14	16	2	22	10	19	0.277778	0.545455	0	0	0.538462	0	0	0	0.512195	0.5	0	0.5
28473273	C	T	T	T	T	T	T	0.882353	0.971429	0.75	0.894737	1	0.571429	34	35	12	76	94	42	0.916667	0.923077	0	0	0.714286	0	0	0	0	0.906977	0	0
42549384	A	G	G	G	G	G	G	0.9	0.6	0.857143	0.8	0.409091	0.5	10	5	7	5	22	10	0.5625	0	0	0	0.5	0.538462	0	0	0	0.285714	0	0.571429
93715532	G	A	A	A	A	A	A	1	1	1	1	1	1	14	13	1	30	22	17	1	0.365854	1	1	0.36	0	0	0	0	0.666667	0	0
112019469	G	A	A	A	A	A	A	1	1	1	1	0.714286	0.75	3	6	9	3	7	8	0	0	1	0	0	0	0	0	0	1	1	0.857143
95051506	G	A	A	A	A	A	A	0.857143	1	1	1	0.75	1	21	4	6	2	4	7	1	0	1	1	0	0	0	0	0	0	1	0
7841914	G	A	A	A	A	A	A	0.285714	0.235294	0.666667	0.444444	0.4	0.375	21	17	24	18	5	16	0	0	0	0	0	0	0	0	0	0	0	0.8
22094978	T	C	C	C	C	C	C	1	1	0.538462	1	1	1	3	4	13	4	3	2	0	0	0.833333	0.6	0	0.75	0	0	1	0.75	0	0
70202899	T	C	C	C	C	C	C	1	1	0.333333	0.5	0.333333	0.4375	2	3	12	4	15	16	1	1	0	0	0	0	0	0	0	0	0	0
75493974	C	T	T	T	T	T	T	0.436364	1	1	1	1	0.178571	55	47	47	17	11	28	0	0	1	1	0.454545	0	0.181818	0	0	0	0.375	0
15469484	C	T	T	T	T,G	T	T	0.8	1	1	1	0.75	1	5	11	4	8	4	7	0.714286	0	0	0	0.733333	1	0	0	0.5	0	0	1
117155217	A	G	G	G	G	G	G	0.68	0.777778	0.692308	1	0.852941	0.77193	25	18	13	11	34	57	0	0	0.272727	0.529412	0.571429	0.5	0	0	0	0.6	0	0.7
22804728	T	C	C	C	C	C	C	1	0.666667	0.5	0.9	0.3	0.555556	10	6	4	10	10	9	0	1	0	0.190476	0	0	0	0	0.8	0.333333	0	0
75495493	C	A	A	A	A	A	A	0.6875	1	1	1	1	0.625	16	19	13	8	3	8	0	0	1	0.333333	0	1	0.714286	0	0	0	0.666667	0
57196467	T	C	C	C	C	C	C	1	0.666667	1	1	1	0.5	3	6	2	8	6	6	0	0.571429	0	0	0	0	1	0	1	0	0	1
74439662	C	G	G	G	G	G	G	0.714286	1	0.714286	0.5	0.666667	1	7	2	7	4	3	3	1	0	0	1	1	0	0	0	0	0	0	0
22533047	C	T	T	T	T	T	T	1	1	1	1	1	1	12	12	6	12	18	18	0	0.545455	0	0	0	1	1	0.307692	0.555556	0	1	0
36989219	G	A	A	A	A	A	A	0.428571	1	1	1	0.6	1	14	8	8	9	10	15	1	0	0	0	0	0.363636	0.2	0	0.5	0	0.375	1
11183047	C	T	T	T	T	T	T	1	1	1	1	1	1	4	4	4	6	13	13	0	0.714286	0	0	1	0.2	0	0	0	1	0.5	1
16807164	A	G	G	G	G	G	G	0.333333	0.6	1	1	0.4	0.666667	6	5	2	5	10	6	0.666667	0.75	1	0	0	0	0	0	0	0	0	0
30044890	G	A	A	A	A	A	A	1	0.571429	1	0.608696	1	1	42	21	39	23	82	90	0.528302	0.571429	0.833333	0.419355	0	0	0	0.676471	0	0	0	0.571429
5754625	T	C	C	C	C	C	C	1	0.285714	0.285714	1	1	0.458333	8	14	14	8	18	24	0	0	0	0	0	1	0.25	0	1	0.2	0	0
57972596	C	T	T	T	T	T	T	1	1	1	1	1	1	4	5	3	3	5	3	0.896552	1	0	0	0	0	0	0	1	0.857143	0	0.666667
97995792	T	C	C	C	C	C	C	0.444444	0.272727	0.222222	0.25	0.181818	0.208333	9	22	9	12	22	24	0	0	0	0	0	0	0	0	0	0	0	0
57214831	G	C	C	C	C	C	C	0.681818	1	1	1	0.636364	0.636364	22	12	18	4	11	11	0	0	1	1	0	1	0	0	0	0.375	0	0
139046141	G	C	C	C	C	C	C	0.666667	0.772727	1	0.741935	0.416667	0.678571	15	22	3	31	12	28	0	0	0	0.75	0	0	0	0	0.7	0.5	0	0.75
37963832	C	A	A	A	A	A	A	1	0.636364	1	0.666667	1	1	2	11	15	6	2	2	1	0	0	0	0.727273	0	0	0	1	0	0	1
27155072	C	T	T	T	T	T	T	0.73125	0.752336	0.976744	0.75	0.702703	0.503846	160	214	43	476	185	260	0.401961	0	0	0	0.315217	0.741047	0	0.280992	0.313761	0.791277	0	0
15406760	G	A	A	A	A	A	A	1	1	1	1	1	1	76	78	58	120	62	163	0	0	0.371429	0.454545	0	1	0	0.98913	0.55102	0.432432	0	0.62963
6543888	G	A	A	A	A	A	A	0.571429	1	1	1	1	1	7	12	3	5	3	8	1	0	0	1	0	1	0	1	0	0	0	0
89839450	T	C	C	C	C	C	C	1	0.333333	1	1	1	1	10	6	17	8	21	24	0.777778	0.75	0	0	0	0	1	0	0.4	0.375	0	0.461538
28505774	T	C	C	C	C	C	C	0.694932	0.575	0.662338	0.608494	0.998285	0.987654	1026	400	154	1507	583	162	0.548624	0	0	0	0.217391	0.998092	0.231638	0	0	0.725664	0	0.238771
28354288	T	C	C	C	C	C	C	0.371429	0.346154	0.255814	0.22973	1	1	105	78	43	148	64	98	0	0.625	0	0	0.568182	0	0	0.444444	0	0	0	0
45670503	G	T	T	T	T	T	T	0.421053	1	0.181818	1	1	1	19	18	11	10	3	12	0	0	0	0	0.666667	1	0.272727	0.363636	0.35	0	0	0.384615
43688806	G	A	A	A	A	A	A	0.555556	0.5	1	0.416667	0.341772	1	99	92	21	120	79	64	0	0	0	0	0	0	0	0.413223	0.457746	0.425287	0.547945	0.40458
7812392	C	T	T	T	T	T	T	0.488889	0.470588	0.833333	0.483871	0.8	0.644444	45	17	42	31	20	45	0	0.375	0	0	0.4	0	0	0	0	1	0.380952	0
5825543	A	T	T	T	T	T	T	0.866667	0.4	0.714286	1	1	0.75	15	5	14	3	3	4	0	0	0	0	0	0	0	0	0.666667	0.5	1	1
98019953	G	A	A	A	A	A	A	1	1	0.7	1	0.454545	1	4	2	10	4	11	8	0.266667	0	0	0	0.3	0.625	1	1	0	0	0.4	0
113564525	A	G	G	G	G	G	G	0.6	0.6	0.666667	0.428571	0.666667	1	10	5	3	7	3	3	0	0	0	0	0	0	1	0	0.5	0.4	0.5	0
86511040	A	G	G	G	G	G	G	0.75	0.4	0.285714	0.75	0.444444	0.428571	4	5	7	8	9	7	0.75	0.75	0	0	0	0	0	0	0	0	0	0
75493656	G	C	C	C	C	C	C	0.333333	1	1	1	1	0.545455	21	31	13	12	17	11	0	0	0.666667	0.818182	0	0.8	0.8	0	0	0.235294	0	0
28470402	T	C	C	C	C	C	C	0.5	0.285714	0.666667	0.52381	0.7	0.28125	4	7	3	21	20	32	0.6	0	0	0	0	0	0	0	0.8	0	0	0
21634041	G	A	A	A	A,T	A	A	1	0.666667	1	1	0.888889	1	6	6	9	2	9	10	0	1	0	0	1	1	0	0	0	1	0	0
69342335	G	C	C	C	C	C	C	0.6	1	0.833333	0.666667	1	0.454545	5	8	6	6	12	11	0	1	0	0	0	0	0	1	1	0	0	0
42655125	T	C	G	C	C	C	C	0.384615	0.666667	1	0.333333	0.6	1	13	3	2	6	5	5	0	0	0	0	0	0.272727	0.666667	0	0	0.5	1	0
82353235	C	A	A	A	A	A	A	0.4375	0.578947	0.333333	0.636364	0.96	0.28	16	19	12	11	25	25	0.477273	0	0	0	0.416667	0	0	0.37931	0	0	0.409091	0
113564770	G	A	A	A	A	A	A	0.465344	0.520523	0.991939	0.997088	0.525111	0.508973	6954	7723	4962	7556	5416	6185	0.998146	0	0	0	0	0.489044	0	0.478356	0	0.501004	0	0
25299991	G	C	C	C	C	C	C	0.588235	1	1	1	1	0.272727	17	25	6	26	7	11	0	0.428571	0.428571	0.590909	0	0.375	0	0.380952	0	0.615385	0.5	0
45673842	A	C	C	C	C	C	C	0.333333	1	1	1	1	1	6	5	2	6	2	14	0	0	0	0	0.4	1	0	1	0.4	0	0	1
46985120	C	T	T	T	T	T	T	0.333333	1	1	1	1	1	9	2	3	7	2	4	1	0	0	1	0	0	0	0	1	0.8	0	0
81689575	G	A	A	A	A	A	A	1	1	0.298077	1	1	1	66	76	104	55	54	118	0.318182	0	0	0.142857	0.333333	0	0.472222	0.537037	1	0	0.444444	0.517241
61409999	G	A	A	A	A	A	A	1	1	1	1	1	1	6	5	24	10	8	6	1	0	0	1	0	0.666667	0	0	0	0.357143	1	0.444444
45900442	A	T	T	T	T	T	T	0.444444	0.4	0.944444	0.444444	1	0.545455	9	5	18	9	4	11	0	0	0.25	0	0	0	0.230769	0	0.153846	0	1	0.615385
60207650	T	C	C	C	C	C	C	0.68	0.6	1	1	0.625	0.5	25	35	49	37	40	52	0	0	0	0	0.492958	0	0.285714	0.676471	1	0.428571	0	0
11162952	T	C	C	C	C	C	C	1	0.977273	0.653846	1	0.479167	1	32	44	26	56	48	64	0.556604	0.579365	0.555556	0.388489	0.404255	0	0	0	0	0	0.606061	0.5
32366511	T	C	C	C	C	C	C	1	0.857143	1	1	0.933333	0.928571	6	14	2	9	15	14	0	0	0	1	0	0	0.8	1	0	0	0.5	0.9
81135013	C	T	T	T	T	T	T	0.4	1	0.371429	1	1	0.566667	50	15	35	23	9	30	0.777778	0	0	0.375	1	0	0	0	0	0	0	0.666667
28470975	T	C	C	C	C	C	C	0.866667	0.375	0.5	0.481481	0.666667	0.322581	15	8	8	27	12	31	0.5	0.58	0	0	0	0	0	0	0.615385	0	0	0
51729889	A	C	C	C	C	C	C	0.518519	0.590909	1	0.607843	1	1	27	22	6	51	20	40	0	0	0	0	0	0.6	1	0	0.641026	0.547619	0.411765	0
43885141	G	T	T	T	T	T	T	0.5	0.615385	1	1	1	1	6	13	11	7	8	7	1	0	0	0	0.6	0	0	0	0	1	0	1
58417063	T	C	C	C	C	C	C	0.727273	0.75	1	0.625	1	0.333333	11	12	6	8	8	9	0	0	0	0	0	0.75	0	0	0.375	0.529412	0.555556	0.714286
75506951	A	T	T	T	T	T	T	0.495606	0.995378	0.990476	0.998473	0.996441	0.494118	569	649	105	655	281	255	0	0.359574	0.507246	0.505682	0.62298	0.493333	0.527778	0	0	0	0.442922	0
97228158	G	A	A	A	A	A	A	0.333333	0.736842	0.5	1	0.545455	0.625	9	19	8	12	11	16	0.375	0	0	0	0	0	0	1	0.857143	0	0	0
59144824	T	C	C	C	C	C	C	1	1	1	1	0.5	1	3	5	6	2	4	3	0	1	0	0	0	1	0	0	0	1	1	0
6102153	C	G	G	G	G	G	G	1	1	1	0.75	0.75	1	4	6	2	8	8	3	1	0	1	0	0	1	0	0	0.5	0	0	0.5
62651777	A	T	T	T	T	T	T	1	1	0.833333	0.666667	1	1	4	2	6	3	4	3	0	1	1	0	0	0	0	0	0	1	0	1
57833194	T	C	C	C	C	C	C	1	1	1	1	1	1	2	2	3	5	2	4	0	0	0.5	1	1	0	0	1	0	1	0	0
156267011	A	C	C	C	C	C	C	1	1	1	1	1	1	2	8	6	3	3	3	0	0	1	1	0	0	0	0	0.5	1	1	0
18651753	T	C	C	C	C	C	C	1	1	1	1	1	1	9	6	8	3	3	4	1	0	1	0	0	1	0	0	0	1	0.5	0
112903116	T	C	C	C	C	C	C	1	1	1	1	1	1	8	9	5	17	6	11	0	0	1	0.5	0	0	0	0	1	1	0	1
7842339	A	C	C	C	C	C	C	0.384615	0.307692	0.272727	0.5	0.4	0.5	13	13	11	6	15	16	0	0	0	0.35	0	0	0	0.25	0	0.269231	0	0
44839467	A	T	T	T	T	T	T	0.428571	1	1	1	0.666667	1	14	5	10	2	6	14	0	0	0	0.285714	0	0.714286	1	0	0	0.7	0.5	0.4
60403715	A	T	T	T	T	T	T	0.375	0.6	0.666667	0.666667	0.416667	0.4	16	5	6	6	12	5	0	0	0	0.225806	0	0	0	0.3125	0.4	0.318182	0.375	0
15541891	T	C	C	C	C	C	C	0.181818	0.222222	0.8	0.6	0.8	0.285714	11	9	5	5	5	14	1	0	0	0	0	0	0	0	0	0	0.4	0
45673846	C	T	T	T	T	T	T	0.333333	1	1	1	1	1	6	5	2	6	3	14	0	0	0	0	0.4	1	0	1	0.444444	0	0	1
90349997	G	T	T	T	T	T	T	0.280488	0.388889	0.25	0.321429	0.333333	0.464286	82	36	72	56	18	28	0	0	0	0	0	0	0	0	0.266667	0	0	0.285714
7812514	G	A	A	A	A	A	A	0.55	0.5	0.782609	0.5	0.5	0.235294	40	22	23	10	16	17	0	0	0	0	0	0	0	0	0	1	0.583333	0
29229561	A	G	G	G	G	G	G	1	0.513514	1	1	0.433333	0.635294	41	37	35	23	30	85	0.5	0	0	0	0	0	0	0	1	1	0	0.6
14888465	G	A	A	A	A	A	A	1	1	0.333333	0.269231	0.5	0.30303	2	2	36	26	6	33	0	0	0	0	0	0	0.25	0.625	0.333333	0.409091	0.307692	0
1322056	T	C	C	C	C	C	C	1	1	0.84	1	1	0.454545	27	20	25	23	10	33	1	0.457143	0	0	0.538462	0	0	0.44	0.358974	0.571429	0	0.45
18208155	A	T	T	T	T	T	T	1	1	1	1	1	1	3	3	3	5	1	3	0	1	0	0	0	0	0	1	0	0.857143	1	0.666667
44110739	A	G	G	G,T	G	G	G	1	1	1	1	1	0.272727	6	8	9	10	2	11	1	0	0.285714	0.25	0	1	1	0	0	0.266667	0	0
43688366	T	G	G	G	G	G	G	0.545455	0.4	1	0.432432	0.428571	1	143	105	24	185	126	117	0	0	0	0	0	0	0	0.452991	0.445205	0.494737	0.529412	0.414062
58078278	A	G	G	G	G	G	G	0.333333	1	1	1	1	0.625	6	12	2	12	12	8	0	0	0	0.217391	0.555556	0.5	0	1	0	0.6	0.615385	0
92432824	T	C	C	C	C	C	C	0.666667	0.615385	0.6	1	0.8	0.647059	15	26	10	3	5	17	1	0.444444	0.857143	0.230769	0	0	0	0	0.333333	0	0	0
22892659	T	C	C	C	C	C	C	0.875	1	1	0.75	0.666667	1	8	8	3	4	3	3	1	0.428571	0	1	0	0	0	0	1	0	0	0.4
59700024	T	C	C	C	C	C	C	0.181818	0.181818	0.5	0.428571	0.5	0.166667	22	22	10	7	4	18	0.5	0	0	0	0	0	0	0	0	0	0	0
48552974	G	A	A	A,T	A	A	A	1	1	1	0.454545	1	1	2	2	4	11	4	5	1	0	0	1	1	0	0	0	1	0	0	0
26693566	T	G	G	G	G	G	G	0.5	1	1	1	0.75	1	2	2	2	6	4	6	0	0	0	0	0	0.3	0	1	0	0.5	1	1
126232854	T	C	C	C	C	C	C	1	1	1	1	0.5	0.8	5	3	2	5	12	5	0.6	0.25	1	0	0	1	0	0	0	1	0	0
10751116	G	A	A	A	A	A	A	0.533333	1	0.25	1	1	1	15	18	8	10	6	2	0	1	0	0	0	0	0	0	0.666667	0.666667	0	1
90439717	G	A	A	A	A	A	A	0.461538	0.8	0.818182	1	0.666667	1	26	15	11	4	6	9	0	0	0	0	1	0	0.625	0	0.6	0.357143	0.714286	0
50187273	A	G	G	G	G	G	G	1	0.194444	1	1	0.290323	1	16	36	7	33	31	38	0.285714	0.176471	0.444444	0	0.25	0.181818	0.222222	1	0.194444	0	0.280702	0
65917278	A	G	G	G	G	G	G	0.363636	0.4	1	0.5	0.666667	0.266667	11	5	6	4	6	15	0.666667	0.153846	0	0	0	0	0	0	0.230769	0.7	0	0
58440191	T	C	C	C	C	C	C	1	0.5	1	1	1	0.625	8	4	7	2	2	8	0	0	0	0.75	0	0.6	0	1	0.333333	0	0	1
114320701	T	C	C	C	C	C	C	1	1	1	0.375	1	1	11	13	3	16	12	8	0.84	0.294118	1	0.666667	0	0	0	0	0	0	0.333333	0.8
45563934	C	T	T	T	T	T	T	0.2	1	1	0.571429	0.75	1	10	2	2	7	4	6	0	0	0	0	0	0.75	0	0	0	0.333333	1	1
34915852	C	A	A	A	A	A	A	0.857143	0.6	0.666667	0.5	0.75	0.714286	7	5	3	8	8	7	0	0	0	0	0	0	0.428571	0	0.555556	0.666667	0	1
98825246	G	A	A	A	A	A	A	0.75	1	1	1	1	0.428571	8	7	9	5	2	7	0	0	0.384615	0.357143	0	0	1	0	0	0	1	1
11162931	A	C	C	C	C	C	C	1	0.962963	0.62963	1	0.488889	0.983333	32	54	27	54	45	60	0.550459	0.578947	0.546218	0.440559	0.395349	0	0	0	0	0	0.675	0.444444
63086077	G	A	A	A	A	A	A	0.595506	1	1	1	0.515625	1	89	103	23	112	64	59	0.377778	0	0.333333	0.446154	0	0.3125	0.285714	0	1	0.54023	0	0.382857
59589218	G	A	A	A	A	A	A	0.75	1	0.944444	0.545455	0.333333	0.333333	8	10	18	11	24	15	0	0	0	0	0.333333	0	0	0	1	0.571429	0	0.571429
55046016	G	C	C	C	C	C	C	1	0.416667	1	1	1	0.666667	2	12	4	7	3	12	0	0.4	0	0	1	0.8	0	0	0.454545	0.5	0.5	0
39659738	T	C	C	C	C	C	C	0.666667	0.818182	0.666667	0.6	1	0.714286	3	11	9	5	7	7	0	1	0	0.181818	0.857143	0	0	1	0	0	0	0
134431192	T	C	C	C	C	C	C	0.571429	0.4	0.375	0.181818	0.625	0.666667	14	15	8	11	8	12	0	0	0	0.727273	0	0	0.666667	0	0	0	0	0
7118378	G	A	A	A	A	A	A	0.416667	0.5	0.875	1	0.52	0.425	12	18	8	36	25	40	0	0.516667	0.333333	0.368421	0	0	0	0	0.641026	0.454545	0	0
27693123	T	G	G	G	G	G	C	0.875	0.8	0.25	0.5625	1	1	8	5	8	16	14	43	1	0.8	0	0	0	0	0	0.666667	0.269231	0.333333	0	0
22413463	A	G	G	G	G	G	G	0.571429	0.333333	1	0.4	0.666667	0.411765	7	12	17	5	3	17	0	0	0	0	0	0	0.666667	0	0	0.8	0.5	0
76542887	C	A	A	A	A	A	A	0.285714	0.666667	1	1	1	0.5	7	3	2	4	5	6	0.4	0.636364	0	0	0.5	0	0	0	0.5	1	0	0
21796979	C	T	T	T	T	T	T	1	1	1	1	1	0.590909	22	11	8	7	17	22	0.764706	0	0.833333	0.777778	1	0	0	0	0.8	0	0	0
15469532	G	A	A,T	A	A	A	A	0.8	1	1	1	0.8	1	5	12	3	9	5	10	0.75	0	0	0	0.722222	1	0	0	0.714286	0	0	1
65743906	T	C	C	C	C	C	C	0.461538	0.5	0.4	0.371429	0.736842	0.648649	26	12	5	35	19	37	0	0	0	0	0.586207	0.390244	0	0	0	0.729167	0	0
11625200	A	C	C	C	C	C	C	1	1	1	0.636364	0.909091	0.2	6	2	2	11	11	10	0	0.555556	0	0	0	0	1	0	0.777778	1	0	0
22556586	G	A	A	A	A	A	A	1	0.666667	1	1	0.857143	1	9	12	20	12	7	29	0	0.24	0	0	0	1	1	0.6	0.272727	0	1	0
725034	G	A	A	A	A	A	A	1	0.488372	0.979167	0.987342	1	1	86	86	48	79	54	76	0	0.507042	0	0	0	0.573529	0.375	0.555556	0.993289	0.44	0.311111	0.288462
57246811	A	G	G	G	G	G	G	0.5	0.571429	0.333333	0.666667	0.2	0.25	4	7	15	3	10	8	0	0	0	0.384615	0	0	0	0	0.727273	0	0	0
40807087	G	A	A	A	A	A	A	1	1	1	1	1	0.6	12	5	7	7	4	5	0	0	0	0	0	0.190476	1	0	1	1	0	1
1322358	A	G	G	G	G	G	G	1	1	0.571429	1	0.935484	0.477273	65	37	14	64	31	44	1	0.458333	0	0	0.341463	0	0	0.44186	0.315789	0.595238	0	0.424242
11440365	A	C	C	C	C	C	C	0.5	1	0.9	1	0.625	0.375	6	7	30	11	8	8	0	0	0	0	0	0.473684	0.857143	0	0	0.846154	0	0.818182
42949792	T	C	C	C	C	C	C	1	1	1	1	1	1	13	2	2	8	8	6	0.722222	0.733333	0	0	0	1	0	0.642857	1	0.5	0	0
154354145	G	C	C	C	C	C	C	0.393939	0.646341	0.533333	0.50303	0.492891	0.598802	99	82	30	165	211	167	0	0	0	0	0	0	0.45	0	0.367925	0.94898	0	0
746087	A	G	G	G	G	G	G	1	0.533333	1	1	1	1	6	15	10	2	12	14	0.357143	0.466667	0	0.2	1	0.375	0.833333	0.4	0	0	0.5	0
75987874	C	G	G	G	G	G	G	0.428571	1	0.5	0.714286	0.5	0.5	7	4	4	7	6	4	0	0.5	0	0	0	0	0	0.833333	0.909091	0	0	0
57185925	T	C	C	C	C	C	C	1	1	1	1	1	1	2	4	4	2	9	3	1	1	0	0	1	0.6	0	1	0	0	0	0
50505056	G	T	T	T	T	T	T	1	1	1	1	1	1	2	3	4	5	9	11	0	0	1	1	0	1	0	0	0	1	0.6	0
22860416	G	A	A	A	A	A,T	A	1	1	1	1	1	1	2	2	6	2	4	11	1	0.6	0	0.5	1	0	0	0	0	1	0	0.5
46639884	T	C	C	C	C	C	C	1	0.615385	1	0.5	0.263158	1	8	13	2	8	19	17	0.481481	0	0.545455	0.625	0	0	0.5	0.4	0.428571	0	0	0
102512708	G	A	A	A	A	A	A	1	0.75	1	1	1	0.647059	8	4	5	7	7	17	1	0	0	0	0	0	1	0	0	1	1	0
77782660	C	T	T	T	T	T	T	0.384615	0.333333	1	0.75	0.5	1	13	9	14	8	4	9	1	0	0	0	1	0.580645	0	0	0	0	0	0
32612765	T	C	C	C	C	C	C	1	0.4	0.285714	0.333333	0.777778	0.315789	11	5	7	6	9	19	0.441176	0	0	0	0	0.285714	0	0	0	0	0	1
52348629	G	T	T	T	T	T	T	0.446809	0.37931	0.25	0.473684	0.357143	0.289474	47	29	24	19	14	38	0	0	0	0	0	0.2	0	0	0	0.333333	0	0.277778
97227833	G	C	C	C	C	C	C	0.5	0.666667	0.888889	1	0.769231	0.444444	12	9	9	10	13	18	1	0	0	0	0	0	0	1	0.888889	0	0	0
57556261	A	C	C	C	C	C	C	1	0.666667	1	1	0.857143	0.529412	14	3	10	5	7	17	0	0	1	0.666667	0	0	0	0	0	0.454545	1	0.555556
2077799	C	T	T	T	T	T	T	1	1	0.588235	1	0.777778	0.631579	12	6	17	2	9	19	0	0	1	0	0.4	1	1	0	0	0.222222	0	0
100494297	T	C	C	C	C	C	C	1	1	1	1	1	0.190476	8	8	2	7	13	21	0	0	0	0	0.866667	0.588235	0	0	0.6	0.59375	0.5	0.666667
7199818	A	G	G	G	G	G	G	1	1	1	1	1	0.375	3	5	8	3	2	8	1	1	0	1	0	1	0	0	0	0	0	0
54803724	G	C	C	C	C	C	C	1	1	1	1	1	1	5	5	2	2	5	2	0.625	1	0	1	0	0	0	0	0	1	0	1
117727518	T	C	C	C	C	C	C	1	0.377778	1	0.992188	1	0.482143	105	135	62	128	56	112	1	0.453333	0	0	0	0	0.522727	1	0	0	0	0.504854
55518777	C	T	T	T	T	T	T	1	0.666667	0.304348	1	1	0.4	8	3	23	6	3	10	0	0	0	0	0	0	1	0	0	0.333333	0.666667	1
73753859	T	C	C	C	C	C	C	0.40625	0.371429	0.25	0.516129	0.411765	0.578947	32	35	8	31	17	19	0	0	0	0	0	0	0	0	0	0.275	0	0.888889
59701838	G	A	A	A	A	A	A	0.666667	1	1	1	1	0.7	3	3	2	2	8	10	1	0	0	0	0	1	0	1	0	0	1	0
15120483	T	C	C	C	C	C	C	1	0.6	0.666667	0.6	1	0.75	2	10	3	5	2	4	1	0	0.25	0.333333	1	0	0	0	0	0.666667	0	0
7778134	A	G	G	G	G	G	G	1	1	1	1	1	1	7	4	4	6	3	6	0	0	0	0	0.8	0.833333	1	0	1	1	0	0
62624235	G	A	A	A	A	A	A	1	1	1	1	1	1	14	17	17	7	4	2	1	0.666667	0	0.666667	0	0	0	0	0.75	0.8	0.75	0
63651114	T	C	C	C	C	C	C	1	1	1	1	1	1	10	6	19	15	26	60	1	0	0	0	0	0.327493	0	0	0.94186	0.465021	1	0.9
11173473	A	G	G	G	G	G	G	1	1	1	1	1	1	8	7	7	7	15	15	0	1	0	0.636364	0	1	0	0	0	0	1	1
20590807	C	T	T	T	T	T	T	1	0.588235	1	0.453125	1	0.409639	49	34	46	64	59	83	0	0	0	0	0	0	0	1	0	0.521739	1	0.567164
8500964	T	G	G	G	G	G	G	1	1	0.941176	0.875	1	1	7	2	17	8	8	12	1	0	0	0	0	1	0	0	1	0.454545	1	0
22542815	C	T	T	T	T	T	T	1	1	1	1	1	1	2	12	5	17	11	9	0	0.75	0	0	0	1	0	0.888889	1	0	1	0
112501352	G	A	A	A	A	A	A	0.527473	0.326923	0.727273	0.361111	0.6625	0.489362	91	52	33	72	80	94	0.378261	0.4	0	0	0.52	0	0	0	0	0	0	0.44
113567470	G	C	C	C	C	C	C	0.618182	0.636364	1	1	0.543478	0.764706	55	33	33	77	46	34	1	0	0	0	0	0.625	0	0.581395	0	1	0	0
128746841	T	C	C	C	C	C	C	1	0.428571	0.444444	0.833333	1	0.315789	19	7	9	6	2	19	0	0	1	1	0	0	0	0.666667	0	0	0	0
5747349	A	G	G	G	G	G	G	1	0.75	1	1	1	1	5	4	6	10	5	5	0	0	0	0.4	1	1	0	0.666667	0	0.529412	0.8	0
65815271	T	A	A	A	A	A	A	0.909091	0.384615	0.533333	0.714286	0.428571	0.454545	11	13	15	7	14	11	0.259259	0	0	0	0.285714	0.225806	0.3	0	0.25	0.333333	0	0.416667
28470352	A	G	G	G	G	G	G	0.4	0.25	0.571429	0.444444	0.823529	0.363636	10	8	7	18	17	22	0.5	0	0	0	0	0	0	0	0	1	0	0
113022107	G	A	A	A	A	A	A	0.272727	1	1	1	1	0.521739	11	15	9	7	8	23	0.411765	0.166667	0.363636	0.217391	0	0	0.615385	0	0.333333	0.333333	0	1
58879816	A	G	G	G	G	G	G	0.3	0.5	0.285714	0.666667	0.428571	0.5	10	10	7	9	7	6	0	0	0	0	0	0	0	0	0	1	0	0.333333
30879608	T	C	C	C	C	C	C	0.45	0.571429	1	0.451613	1	0.475	20	21	13	31	12	40	0	0	0	0	0.547619	0.239437	0	1	0.413793	0	0	0.4
63651144	A	G	T	T	T	T	T	1	1	1	1	1	1	10	8	14	15	25	56	1	0	0	0	0	0.337758	0	0	0.936709	0.484746	0.987342	0.909091
27154996	C	T	T	T	T	T	T	0.833333	1	0.8	0.8	1	1	6	3	5	10	7	7	0.714286	1	0	0	0	0.625	0	0	0	0.75	0	1
87267037	C	T	T	T	T	T	T	0.818182	0.571429	1	0.727273	1	0.75	11	7	3	11	6	8	0	0	1	0.923077	0.6	1	0	0	0	0	0	0
49795432	A	G	G	G	G	G	G	1	0.434783	0.275862	0.428571	0.411765	1	36	23	29	7	17	60	0.431818	0.470588	0	0	0.533333	0.380952	0.392857	0	0	0	0	0
72877898	T	G	G	G	G	G	G	0.402985	1	1	0.923077	1	0.388889	67	10	7	13	17	18	0	1	0	0	0	0	0	0	1	0.875	0	0.5
11836526	A	C	C	C	C	C	C	1	1	1	1	1	1	10	4	2	3	2	12	0	0	0.75	0	1	1	0	0	1	0.555556	0.357143	0
35146449	C	T	T	T	T	T	T	1	1	1	1	1	1	4	7	5	2	5	5	0	0.409091	1	1	1	0.333333	0.333333	0.588235	0	0	0	0
98696158	C	G	G	G	G	G	G	1	0.666667	0.666667	1	1	1	7	9	6	5	3	7	0	0	0	0	0	0	1	0	1	1	0	1
94598600	A	G	G	G	G	G	G	1	1	1	1	1	1	6	5	2	4	3	5	1	0	0	0	0.833333	1	0	0	1	0	0	0.833333
79049292	G	T	T	T	T	T	T	1	1	1	1	1	1	4	2	8	2	2	2	1	0	0	0.666667	0	0	1	0	1	1	0	0
15154308	C	G	G	G	G	G	G	1	1	1	1	1	1	8	11	5	5	9	17	0	0	0	1	1	1	0	0	0	0.666667	1	0
32076386	T	C	C	C	C	C	C	1	1	1	1	1	1	5	6	9	3	2	9	1	0	1	0	0	1	0	0	0	0	0.666667	1
92969315	A	G	G	G	G	G	G	1	1	1	1	1	1	2	2	4	2	4	5	1	0	0	1	0	1	0	0	0	0.666667	1	0
45674229	C	T	T	T	T	T	T	1	1	1	1	1	1	8	23	2	14	13	7	0	0	0	0	0	1	0.75	0	0.642857	0.4	0.875	1
39095353	T	C	C	C	C	C	C	0.538462	1	1	0.333333	1	0.333333	13	3	12	6	2	6	0	0	0	0	0	0	1	0	0.833333	0.666667	0.375	0
28470497	C	T	T	T	T	T	T	0.3125	0.571429	1	0.62069	1	0.428571	16	14	3	29	33	63	0.555556	0.235294	0	0	0	0	0	0	0.8125	1	0	0
38439363	T	C	C	C	C	C	C	0.666667	0.307692	0.7	1	1	0.636364	6	13	10	3	2	11	0	0	0	1	0	0	0.25	0.333333	0.4	0.428571	0.571429	0
7116626	G	T	T	T	T	T	T	0.818182	0.357143	1	1	0.466667	0.692308	11	14	3	23	15	13	0	0.551282	0.5	0.783784	0	0	0	0	0.612903	0.56	0	0
8571501	G	A	A	A	A	A	A	1	1	1	1	1	1	29	22	86	3	28	31	0	1	0.727273	0.969697	0.2	0	0.166667	0.4	0	0	0.916667	0.294118
69945928	T	C	C	C	C	C	C	0.181818	1	1	0.428571	0.416667	0.388889	22	12	21	7	12	18	0	0	0	0	0	0	0.5	1	0	0.590909	0	0
59571505	G	A	A	A	A	A	A	1	0.428571	0.4	1	0.428571	0.5	9	7	5	2	7	10	0	0	0.555556	0	0	1	0	0	0	0.545455	0.333333	0
57935120	G	C	C	C	C	C	C	0.537143	0.465909	0.543103	1	1	0.558824	175	88	116	55	70	102	0	0	0.466667	0.6	0	0.559322	0	0.616667	0.541284	0	0	0
27685452	C	G	G	G	G	G	G	0.545455	0.2	0.2	0.37931	0.277778	0.277778	11	20	10	29	18	36	0	0	0	0	0	0	0	0	0	0.56	0	0
90350002	G	T	A	A	T	A	A	0.344828	0.358974	0.243243	0.368421	0.388889	0.366667	87	39	74	57	18	30	0	0	0	0	0	0	0	0	0.34375	0	0	0.409091
99968480	A	G	G	G	G	G	G	0.333333	0.75	0.333333	0.666667	1	0.4	6	8	9	3	4	10	0	0	0	0	0.666667	0	0	0	0.5	1	0	0
50937988	A	G	G	G	G	G	G	1	1	1	1	1	1	2	6	4	5	5	9	1	0	0.5	0.184211	0	1	0	0	0	1	0	1
6232473	T	C	C	C	C	C	C	0.681818	0.526316	0.538462	0.5	0.857143	0.727273	22	19	13	4	7	11	0	0	0.615385	0	0	0	0	0.4	0	0	0.5	1
45521072	A	T	T	T	T	T	T	0.519231	1	1	0.487179	1	0.462963	52	34	64	39	53	108	0.444444	0	0	0	0	0	0	0.468085	0.948276	0.451327	0.426471	0.416667
11176778	C	T	T	T	T	T	T	1	1	0.5	1	0.35	1	11	20	8	28	20	19	0.5	0.357143	0.470588	0.625	0.6	0	0	0	0	0	0.416667	0.571429
20128689	A	G	G	G	G	G	G	1	1	0.52381	1	1	1	62	29	21	46	26	93	0.333333	0	0.25	0.3125	0.25	0.5	0.928571	0	0.485714	0	0.380952	0.777778
16903504	G	T	T	T	T	T	T	1	1	1	1	1	1	8	8	5	4	4	5	0.705882	0	0.3	0.857143	0	0.333333	0	0	1	0.5	0	1
185160	C	T	T,A	T	T	T	T	0.928571	1	0.5	0.777778	0.6	0.75	14	7	4	9	5	8	0	0	0	0.285714	0	0	1	0.333333	0	0.636364	0	1
46459642	T	C	C	C	C	C	T	1	0.333333	0.8	1	1	0.666667	7	6	10	5	2	3	0	0	1	1	0	0	0	1	0	0	0.5	0
92810803	G	C	C	C	C	C	C	0.8	0.5	1	1	1	1	5	8	16	2	6	6	0	0	0	0	0	1	1	0	1	0	0	1
58072849	A	G	G	G	G	G	G	0.571429	1	1	1	1	0.4	14	8	4	18	10	10	0	0	0.75	0.571429	0	0.458333	0	0	0	0.608696	0.533333	0.75
79432839	T	G	G	G	G	G	G	1	0.666667	0.75	0.6	1	0.666667	6	6	12	10	4	6	1	1	0	0	0	0	1	0	0.388889	0	0	0
15358931	A	G	G	G	G	G	G	0.72	1	1	0.526316	1	0.769231	25	37	4	38	22	26	0	0	0	0	0.636364	0.5	0	1	0	0.961538	0	0.625
97227530	T	C	C	C	C	C	C	1	0.666667	0.6	1	0.611111	1	9	15	15	13	18	21	0	0	0.285714	0.5	0	0	1	1	0.8	0	0	0
15686387	C	G	G	G	G	G	G	0.916667	1	0.4	0.230769	0.4	1	12	3	5	13	15	14	0	0	1	0.666667	0.388889	0	0	0.6	0	0	0	0
112501353	C	A	A	A	A	A	A	0.527473	0.346939	0.705882	0.346667	0.65	0.5	91	49	34	75	80	92	0.403509	0.383234	0	0	0.544828	0	0	0	0	0	0	0.455696
1155836	A	G	G	G	G	G	G	0.666667	1	0.627907	1	1	0.714286	39	18	43	13	9	14	0	0	0.521739	0.733333	0	0	0.3	1	0.25	0.25	0	0.666667
63651207	G	A	A	A	A	A	A	1	1	1	1	1	1	10	4	11	7	4	31	1	0	0	0	0	0.36342	0	0	0.933333	0.508137	1	0.909091
36574867	G	T	T	T	T	T	T	0.385714	0.25	0.55	0.5	0.333333	0.275862	70	60	20	28	30	58	0	0	0	0	0	0	0.407407	0	0	0.261905	0.340909	0
63650552	A	G	G	G	G	G	G	0.24	1	1	1	1	1	25	4	26	8	20	51	1	0	0	0	0	0.383639	0.8	0.6	0	0	0.979381	0.192308
45563940	G	A	A	A	A	A	A	0.2	1	1	0.571429	0.75	1	10	2	2	7	4	6	0	0	0	0.157895	0	0.75	0	0	0	0.333333	1	1
67160024	G	A	A	A	A	A	A	1	0.5	1	1	1	0.666667	9	10	7	10	5	9	1	0	1	1	0	0.222222	0	0	0	0.666667	0	0
88965590	G	T	T	T	T	T	T	1	1	1	0.909091	0.666667	0.666667	7	2	6	11	6	6	1	1	0	0.666667	0	0	0	0	0	0.8	0.5	0
1093876	C	T	T	T	T	T	T	0.833333	0.595238	0.888889	0.473684	0.596491	0.410256	60	42	45	38	57	78	0	0.294118	0	0	0	0.483333	0	0	0.234043	0.396226	0.851852	0.266667
60520067	T	C	C	C	C	C	C	0.611111	1	0.25	0.555556	0.4	0.533333	18	15	8	9	5	15	0	0	0	0	1	0	0.454545	0	0	0.625	0	0
113021835	G	T	T	T	T	T	T	0.533333	0.3	1	1	0.181818	0.378378	15	10	7	7	11	37	0	0.259259	0.409091	0.216216	0	0	0.309524	0	0.333333	0.6	0	0
92386275	T	C	C	C	C	C	C	0.163636	0.230769	0.5	0.142857	0.5	0.416667	55	39	8	14	6	36	0	0.259259	0	0	0	0	0	0	0	0.428571	0	0
51647054	G	C	C	C,A	C	C	C	1	0.428571	1	1	1	1	3	7	6	3	10	13	0	0.363636	1	1	0	0	0	0	0	1	0	0.8
16347013	A	G	G	G	G	G	G	1	1	1	0.529412	1	1	50	28	18	68	40	54	0	0	0	0	0.333333	0.5	0.727273	0.758621	0	0.485714	0.961538	0.5
34807340	G	A	A	A	A	A	A	1	0.545455	0.433333	0.407407	0.607143	0.511628	31	22	30	27	28	43	0	0	0	0	0	0.666667	0.5	0.451613	0	0.625	0	0
14548656	G	C	C	C	C	C	C	0.777778	0.666667	0.8	1	0.8	0.5	9	6	5	6	5	4	0	0.857143	0.5	0	0	0	0	0	0.545455	0.714286	0	0.666667
51272257	T	C	C	C	C	C	C	0.5	0.454545	1	0.5	0.714286	0.375	6	11	6	4	7	8	0	1	1	0	0	0	0	0	0	0	0	0.285714
27814084	G	T	T	T	T	T	T	0.538462	0.666667	0.666667	0.384615	0.384615	0.5	13	12	9	13	13	20	0	0.5	0	0	0	0	0	0.5	0.454545	0.428571	0	0
55606095	A	T	G	G	G	G	G	0.2	0.285714	0.6	0.4	0.387097	0.133333	10	7	5	5	31	30	0	0	0	0	0.75	0	0	0	0	0	0	0
63667494	C	G	G	G	G	G	G	1	1	1	1	1	1	2	2	27	3	7	16	1	0	0	0.240458	0.285714	0.5	0	0	1	0.72	1	0
103845573	G	C	C	C	C	C	C	0.8	0.8	1	0.785714	0.666667	0.8	5	5	2	14	9	5	0	0	0	0	1	0	0	1	0	1	0.6	0
19178517	G	A	A	A	A	A	A	1	1	1	1	0.25	1	10	4	7	2	8	4	1	0	0	0	0	0	0	0	1	1	1	0
47823651	T	C	C	C	C	C	C	1	1	1	0.75	1	1	2	10	20	4	2	8	0	0	0	0	0	0	1	0	1	0.5	1	1
116901926	G	A	A	A	A	A	A	1	0.25	1	1	1	1	12	8	6	4	5	7	1	0	0	0	0	0	0	0	1	1	1	0
58703076	C	T	T	T	T	T	T	1	1	1	1	1	1	39	21	21	3	8	24	0	0	0.75	0	0	0	0	0	1	1	1	1
11391625	A	C	C	C	C	C	C	1	1	1	1	1	1	10	5	6	2	2	10	1	0	0	0	1	0.75	1	0	0	1	0	0
12666217	A	G	G	G	G	G	G	1	1	1	1	1	1	7	2	11	4	2	7	1	0	1	0	0	1	0	0	0	0.75	1	0
82516990	C	T	T	T	T	T	T	1	1	1	1	1	1	5	7	6	7	3	3	0	0	0	0	1	1	1	0	0	0.75	1	0
49882891	A	G	G	G	G	G	G,T	1	1	1	1	1	1	5	14	6	7	2	10	1	0	0	0	0	0	1	0	1	0.75	1	0
49882901	C	T	T	T	T	T	T	1	1	1	1	1	1	6	15	6	7	2	13	1	0	0	0	0	0	1	0	1	0.75	1	0
69945062	A	G	G	G	G	G	G	0.25	1	1	0.5	0.454545	0.390244	24	12	25	8	11	41	0.555556	0.3	0	0	0.714286	0	0.315789	0	0	0.459459	0	0
49402124	T	C	C	C	C	C	C	0.285714	0.75	0.210526	1	1	0.857143	14	4	19	4	2	7	0.888889	0	0	0.533333	0	0	0	0.6	0	0	0	0.833333
7778397	T	C	C	C	C	C	C	1	1	1	0.285714	1	1	17	14	2	7	6	18	0.375	0	0	0	0.666667	0	1	0	0	1	0	1
98916753	T	C	C	C	C	C	C	0.8	1	1	0.333333	0.4	1	10	3	4	6	5	8	0.818182	0	0	0	0	0	0	0.5	0.571429	1	0	0.4
7116623	C	G	G	G	G	G	G	1	0.375	1	1	0.4375	0.714286	13	16	3	26	16	14	0.430556	0.545455	0.333333	0.789474	0	0	0	0	0.612903	0.571429	0	0
69944413	G	A	A	A	A	A	A	0.5	1	1	0.25	0.666667	0.588235	8	6	14	8	6	17	0.666667	0	0	0	0.5	0	0.6	1	0	0	0	0
79803862	T	C	C	C	C	C	C,A	1	1	0.75	0.571429	1	1	4	6	8	7	2	3	1	0.777778	0	0.684211	1	0.4	0	0	0	0.222222	0	0
85045900	A	G	G	G	G	G	G	0.5	0.75	0.8	1	1	0.285714	4	8	5	5	5	7	1	0	0	0	0	0	0.3	0	1	0.8	0	0
39457693	T	C	C	A	A,C	C	C	0.47619	0.571429	0.235294	0.636364	0.272727	0.7	21	14	17	11	11	20	0.363636	0	0	0.333333	0	0	0	0	0.25	0.714286	0	0
65129381	T	G	G	G	G	G	G	1	1	0.823529	0.487179	1	1	22	21	17	39	42	54	0	0	0.578947	0.6875	0	0.480519	1	0	0.474576	0	0.862069	0
742289	G	C	C	C	C	C	C	1	0.888889	1	1	1	1	2	9	8	6	4	3	0	0	0.666667	0	1	1	0	0	1	1	0	0
74026188	A	G	G	G	G	G	G	0.5	1	1	1	1	1	4	7	2	5	3	5	0.5	0.75	0	0	0	1	0	0.428571	1	0	0	0.6
117176293	G	A	A	A	A	A	A	0.763636	0.404762	0.765625	1	1	1	55	42	64	12	11	55	0	0	0.541667	0.6	0.857143	1	0	0.714286	0	0	0	0
66066670	C	T	T	T	T	T	T	1	1	0.714286	0.8	0.407407	1	5	9	7	15	27	23	0	0.578947	0.571429	0.25	0.416667	0.285714	0	0.727273	0.444444	0	0	0.428571
11440360	A	T	T	T	T	T	T	0.428571	1	0.903226	1	1	0.428571	7	6	31	12	5	7	0	0	0	0	0	1	0.857143	0	0	0.866667	0	0.818182
28446396	C	T	T	T	T	T	T	0.636364	0.272727	0.4	0.2	0.833333	0.5	22	11	5	10	6	12	0	0	0	0	1	0	0	0	0	0.625	0	0
51058874	T	C	C	C	C	C	C	0.636364	1	1	1	0.948718	0.703704	11	22	13	39	39	54	1	0	0	0	0.5	0.68	0	0	0	0.982456	0	0.909091
42000475	A	G	G	G	G	G	G	1	1	1	1	0.416667	1	4	5	1	2	12	7	0	0.2	0	0	1	1	0	0	1	0	1	0
42597299	A	G	G	G	G	G	G	1	1	1	1	1	1	11	17	4	15	11	11	0	0	1	1	0.5625	0	0	0	0.222222	0	1	1
15856431	G	A	A	A	A	A	A	0.990476	0.578947	0.666667	0.992424	0.52459	1	105	57	30	132	61	72	0	0	0	0	0.4	0.691589	0.294118	0.580952	0	0	1	0.575
28333664	T	C	C	C	C	C	C	0.972973	0.944444	1	0.936508	0.9	0.967033	37	18	8	63	90	182	0.683544	0.33795	0	0	0	0.590164	0	0.541667	0.741176	0.590909	0.607143	0.418605
6882287	C	A	A	A	A	A	A	1	1	1	1	1	0.875	3	5	13	3	4	8	0	1	1	1	0	0.666667	0	0	0	0	1	0
6882290	C	A	A	A	A	A	A	1	1	1	1	1	0.875	3	5	13	3	4	8	0	1	1	1	0	0.666667	0	0	0	0	1	0
34915830	G	A	A	A	A	A	A	1	1	1	0.666667	1	0.625	8	7	6	12	9	8	0.5	0	0	0	0	0	0.586207	0	1	1	0	1
9996675	T	C	C	C	C	C	C	0.3	0.5	0.809524	0.333333	0.5	0.875	10	4	21	9	2	8	0	0.75	0	0.7	0	0	0	0	0.666667	0	0	0
93955480	T	C	C	C	C	C	C	0.285714	0.555556	1	1	0.444444	0.470588	7	9	2	5	9	17	0	0	0	1	0	0	0	0	0.555556	1	0	0
104292210	A	G	G	G	G	G	G	1	1	1	1	1	1	2	4	7	4	2	2	1	1	0	0	1	1	0	0	0	0.8	0	0
1353592	T	A	A	A	A	A	A	1	1	1	1	1	1	4	4	2	2	2	4	1	0	0	1	0	1	1	0	0	0	0.8	0
1353604	A	G	G	G	G	G	G	1	1	1	1	1	1	4	8	2	2	2	4	1	0	0	1	0	1	1	0	0	0	0.8	0
1353607	C	G	G	G	G	G	G	1	1	1	1	1	1	4	8	2	2	2	4	1	0	0	1	0	1	1	0	0	0	0.8	0
62697292	A	G	G	G	G	G	G	0.480519	0.503521	0.541528	0.487719	0.995261	1	308	284	301	285	211	305	0	0	0.60303	0.635097	0.478448	0	0.480818	0	0	0	0.611354	0
92431795	T	C	C	C	C	C	C	0.5	0.857143	1	1	0.444444	0.722222	8	14	2	6	9	18	0.666667	0.657895	1	0	0	0	0	1	0	0	0	0
20590237	T	C	C	C	C	C	C	1	0.365854	1	0.441176	1	0.539394	99	82	146	102	63	165	0	0	0	0	0	0	0	1	0	0.598291	0.976744	0.575949
71440867	G	A	A	A	A	A	A	0.583333	1	1	1	1	1	12	9	3	9	10	11	1	0	1	1	0	0	0	0	0.833333	0.555556	0	0
85951935	G	T	T	T	T	T	T	1	0.857143	1	1	1	1	15	14	4	44	29	14	1	0	0	1	0	0	0	0	1	0.666667	0	1
45473766	A	G	G	G	G	G	G	0.638889	0.5	0.347826	0.625	0.875	0.526316	36	24	23	16	8	19	0	0.25	0.4375	0.333333	0.428571	0	0	0	0.416667	0.461538	0	0
2869837	T	G	G	G	G	G	G	1	0.714286	1	0.642857	1	1	6	14	4	14	11	16	1	0.777778	0.6	0.576923	0.384615	0	0	0.333333	0	0	0.5	0
34480376	T	C	C	C	C	C	C	0.428571	0.6875	1	1	1	1	7	16	14	30	17	9	1	0	0.466667	0.166667	0	1	0	1	0	0	0.3	0
28354841	A	G	G	G	G	G	G	0.323529	0.416667	0.2	0.411765	0.952381	1	34	24	15	34	42	38	0	0.740741	0	0	0.583333	0	0	0.8	0	0	0	0
18842645	G	C	C	C	C	C	C	1	0.25	0.5	1	1	1	6	8	16	10	12	9	0	0	0	0	0	1	0	0	1	0.571429	1	0
112335100	T	C	C	C	C	C	C	0.875	1	1	0.625	1	0.666667	8	14	15	8	6	3	0	0	0.333333	0.272727	0	0.615385	0	0.6	1	0.666667	0	0.5
61144972	C	T	T	T	T	T	T	1	1	0.8	0.7	0.522727	0.666667	53	32	10	40	44	54	0.657143	0	0	0	0	0	0	1	0.636364	0.222222	1	0
21835531	T	C	C	C	C	C	C	0.7	1	1	0.6	1	0.517241	10	20	29	10	29	29	0.454545	0.478261	1	1	0	0	0	0	0	0.714286	0	0
49620528	A	G	G	G	G	G	G	1	0.571429	1	1	1	0.846154	5	7	2	4	7	13	1	0	0	0.25	0	0	0	1	0	0	1	1
51153126	A	G	G	G	G	G	G	1	1	1	1	0.666667	0.5	2	2	4	2	6	4	1	0	0	0	1	0	0	0	1	1	0	0
59226759	G	A	A	A	A	A	A	1	1	1	1	0.166667	1	3	6	6	2	12	4	0	1	0	0	0	1	1	0	0	1	0	0
29779633	T	C	C	C	C	C	C	1	0.666667	1	1	1	1	4	6	2	3	2	4	1	0.5	0	1	0	1	0	0	0	0	0	1
33250073	C	T	T	T	T	T	T	0.875	1	1	1	1	1	8	6	2	2	8	11	0	1	1	1	0	0.47619	0	0	0.4	0	0	0.833333
59683423	G	A	A	A	A	A	A	0.412844	0.384615	0.381579	0.540541	0.382353	0.394737	109	65	76	37	34	76	0	0	0	0	0.571429	0.571429	0.190476	0	0	0	0	0
11715924	G	A	A	A	A	A	A	1	0.352941	1	0.4	0.555556	1	4	17	2	5	9	17	0.6	0	0	0	1	0	1	0	0	0.545455	0	0
6882081	A	G	G	G	G	G	G	0.25	0.5	0.230769	0.285714	0.818182	0.285714	12	6	13	7	11	7	0	0	0.363636	0.466667	0	0	0	0	0	0	0.380952	0
73104891	C	G	G	G	G	G	G	0.5	0.5	1	1	1	0.666667	8	8	3	10	7	6	0.6	0.363636	0.545455	0	0	1	0	1	0	0	0	0
7805388	G	A	A	A	A	A	A	0.594595	0.6	0.555556	0.529412	0.272727	0.4	37	15	18	17	22	25	0	0	0	0	0.333333	0	0	0	0	1	0.461538	0
23780936	T	C	C	C	C	C	C	0.153846	0.666667	0.666667	0.571429	0.25	0.181818	13	9	3	7	8	11	0	0	0	0	0.666667	0	0	0	0	0	0.666667	0
6882284	C	A	A	A	A	A	A	1	1	1	1	1	0.875	3	4	13	3	4	8	0	1	1	1	0	0.722222	0	0	0	0	1	0
28355807	C	G	G	G	G	G	G	0.411765	0.5	1	0.47619	1	1	17	12	8	42	16	12	0	0.235294	1	1	1	0	0	0	0	0	0	0
8962661	T	C	C	C	C	C	C	1	0.9	1	1	0.75	0.5	5	10	2	2	4	4	1	0	0	1	0	0	0	1	0	1	0	0
50630156	A	G	G	G	G	G	G	1	0.75	1	1	1	1	7	4	2	5	7	13	0	0	0	0	0	1	0	0	1	1	0.6	1
45689951	C	T	T	T	T	T	T	1	1	1	1	1	1	3	5	3	12	8	13	0.777778	0	0	0	0.538462	1	0	0.785714	0	1	0	0.75
45473015	T	C	C	C	C	C	C	0.6	1	1	0.5	1	1	5	5	2	4	2	4	0	0	0	0	0	0.666667	0	1	0	0.285714	1	1
44111100	C	T	T	T	T	T	T	1	1	1	1	1	0.857143	2	5	8	3	4	7	1	0	0	0.210526	0.5	1	1	0	0	1	0	0
126934654	T	C	C	C	C	C	C	1	0.625	0.444444	0.533333	0.7	1	16	16	9	15	20	21	0.594595	0	0	0	0	0.193548	0.307692	0	0	0.461538	1	0.6
23837152	T	G	G	G	G	G	G	0.375	1	1	1	0.3	0.833333	8	10	15	2	20	12	0	0	0	1	0	0.363636	0	0	1	0	1	0
99968455	A	G	G	G	G	G	G	0.833333	0.75	0.666667	0.5	1	0.444444	6	8	6	4	4	9	0	0	0.454545	0.428571	0.666667	0	0	0	0.5	1	0	0
30354973	A	G	G	G	G	G	G	1	1	1	0.666667	1	1	8	2	4	6	3	1	0	1	0.857143	0.666667	0	1	0	0	0	0	0	1
58703083	G	A	A	A	A	A	A	1	1	1	1	1	1	39	23	22	2	10	27	0	0	1	0	0	0	0	0	1	0.857143	1	1
20632852	G	A	A	A	A	A	A	0.478261	1	1	0.461538	0.333333	1	23	16	7	26	15	14	0.5	0	0	0	0	0	0.217391	0.777778	0.647059	0.625	0	0.363636
33163096	T	G	G	G	G	G	A	0.617647	0.492958	0.416667	0.517241	0.714286	0.2	34	71	60	29	7	10	0	0	0	0	0	0	0	0.666667	0	0.142857	0.722222	0.285714
35137382	A	G	G	G	G	G	G	0.4	0.272727	0.461538	0.571429	0.217391	0.217391	10	11	13	7	23	23	0	0	0	0	0	0	0	0	0.5	0	0.5	0
105364726	G	T	T	T	T	T	T	0.928571	1	1	1	1	1	42	25	6	24	4	9	0.789474	1	0	0	0	0	1	0	0	1	1	0
89837457	A	C	C	C	C	C	C	1	0.333333	1	1	1	0.909091	8	6	13	9	9	11	0.538462	0.714286	0	0	0	0.833333	0	0.4	0	0.818182	0	0.8
28470381	T	A	A	A	A	A	A	0.285714	0.333333	0.4	0.526316	0.736842	0.354839	7	6	5	19	19	31	0.5	0	0	0	0	0	0	0	0	1	0	0
12393003	A	C	C	C	C	C	C	0.7	0.5	1	0.5	0.769231	0.3	10	10	3	12	13	10	0	0.5	0	0	0	0	0	0.75	0.384615	0	0.571429	0.428571
24973659	A	C	C	C	C	C	C	1	1	1	1	0.75	1	3	66	12	4	4	5	0.653846	0	0	0.5	0	0	0	1	0.461538	1	0.333333	0.666667
12953278	T	C	C	C	C	C	C	0.615385	0.428571	1	1	0.4	0.526316	13	7	5	12	10	19	0	0	0	0	0.428571	0.757576	0	0	1	0.4	0	0.25
45334828	G	A	A	A	A	A	A	1	0.4	1	0.461538	1	1	3	5	2	13	5	6	0.266667	0.888889	0	0.785714	0	0	0.571429	0	0	0.416667	0.8	0
117177786	T	G	G	G	G	G	G	0.333333	0.4	0.44186	0.909091	1	1	18	45	43	22	19	23	0	0	0.181818	0.545455	0.6	1	0	0.625	0	0	0	0
92474134	T	C	C	C	C	C	C	0.546875	0.4	0.269231	0.575758	0.5625	0.653061	64	50	26	33	16	49	0.475	0.533333	0	0.368421	0.5	0	0	0	0	0	0	0
52835253	C	G	G	G	G	G	G	1	1	0.666667	0.512195	0.454545	0.25	28	4	9	41	11	12	0.313725	0	0	0	0.621622	0.5	0	0.431034	0	0.535714	0.352941	0
15852190	A	G	G	G	G	G	G	1	0.530612	0.5	1	0.5	1	83	49	4	120	52	45	0	0	0	0	0.457143	0.446429	0.5	0.5	0	0	1	0.5
114320598	C	G	G	G	G	G	G	1	1	1	0.285714	1	1	4	7	8	14	10	17	0.409091	0	0.75	1	0	0	1	0	0	0	0	1
71439929	T	C	C	C	C	C	C	0.625	1	1	1	1	1	8	5	7	4	7	6	1	0	1	1	0	0	0	0	0.5	0	0	1
66625244	A	T	T	T	T	T	T	1	0.75	0.555556	0.5	1	1	4	4	9	4	3	13	0	0.4	1	0.714286	0	0	0	0	0.571429	0	1	0
2129471	C	T	T	T	T	T	T	0.533333	1	1	1	1	0.409091	15	12	4	8	11	22	0	0.2	0	0.296296	0.52	1	0	0	0.214286	0.703704	0	0.888889
7654294	G	T	T	T	T	T	T	1	1	1	1	1	1	17	8	24	12	15	24	1	0	0	0	0.428571	0.285714	0	0.5	0	1	0.666667	1
4040944	A	G	G	G	G	G	G	1	1	1	0.419355	1	1	36	28	16	31	11	25	0.666667	0.458333	0	0	1	0	0	1	0	0	0.928571	0.25
63650111	A	G	G	G	G	G	G	1	1	1	1	1	0.963636	33	6	42	16	24	55	0.962963	0	0	0	0	0.401929	0	0	1	0.483023	1	1
45125355	C	T	T	T	T	T	T	0.666667	0.416667	1	0.52	1	1	12	24	14	25	10	10	0.508197	0.517241	0.407407	0.527778	0	0	0.210526	0	0.647059	0.36	0.3125	0
4078352	T	C	C	C	C	C	C	1	1	1	1	1	1	5	5	9	15	5	12	0.392857	0	1	1	0	1	0	0	1	0.5	0	0
121237371	C	T	T	T	T	T	T	0.585366	0.961538	0.7	0.301887	0.444444	1	41	26	30	53	36	29	0.433962	0.492063	0.35	0.403509	0.5	0.222222	0	0	0.490196	0	0	0
45563836	T	C	C	C	C	C	C	0.4	1	1	0.8	0.4	1	10	6	13	10	5	13	0	0	0	0	0	0	1	0	0	0.5	1	1
11163111	G	A	A	A	A	A	A	1	1	0.689655	0.970588	0.46875	1	37	28	29	34	32	60	0.569767	0.574074	0.609375	0.517544	0.605263	0	0	0	0	0	0.758621	0.394737
15864361	A	G	G	G	G	G	G	1	0.626866	0.511811	0.987421	0.51417	0.996441	290	201	127	318	247	281	0	0	0	0	0.519417	0.576471	0.446043	0.410256	0	0	0.994048	0.593023
42692840	A	G	G	G	G	G	G	0.727273	1	0.416667	0.478261	0.478261	0.411765	11	29	36	23	46	34	0	0	0.56	0.56621	0	0	0	0	0.55	0.740741	0	0
25657770	C	A	A	A	A	A	A	1	1	1	1	1	1	7	11	8	4	2	8	0	0	1	0	0	0	0	0	1	1	0.904762	1
35721343	T	C	C	C	C	C	C	1	1	0.230769	0.428571	0.463415	0.827586	15	15	13	7	41	29	0	0	0	0	0	0	0	0	1	0	0.857143	1
42074812	T	C	C	C	C	C	C	0.6	0.136364	0.615385	1	1	0.454545	5	22	26	3	4	11	0	0	0	0	1	0.714286	0	0	1	0	0	0
69370753	C	T	T	T	T	T	T	1	1	1	1	1	1	15	20	9	8	9	4	0	1	0.181818	0.727273	0	0	1	0	1	1	0	0
121237297	T	C	C	C	C	C	C	0.5	1	0.821429	0.4	0.36	1	36	20	28	30	25	26	0.493827	0.380952	0.454545	0.34	0.611111	0.172414	0	0	0.538462	0	0	0
97227820	G	C	C	C	C	C	C	0.5	0.5	0.818182	1	0.714286	0.411765	10	8	11	8	14	17	1	0	0	0	0	0	0	1	0.857143	0	0	0
13281112	T	C	C	C	C	C	C	0.545455	1	0.6	1	1	1	11	13	10	11	11	4	0	0.1875	0.25	0	0	0	1	0.454545	0.666667	1	0	0.5
35146942	C	T	T	T	T	T	T	1	1	0.666667	1	1	1	6	2	3	4	3	7	0	0.75	1	1	1	0.833333	0	0	0	0	0	0
9312698	A	G	G	G	G	G	G	0.444444	0.25	0.222222	0.5	0.75	0.25	9	8	9	4	4	12	0	1	0	0	0	0	0	0	0	0.333333	0	0
15405186	G	A	A	A	A	A	A	1	1	1	1	1	1	4	17	7	12	9	11	0.529412	0.388889	0	0	0	1	0	0	1	1	0	1
3024773	T	A	A	A	A	A	A	0.988636	1	1	1	1	0.983871	88	67	19	90	52	62	0	0.982759	0	0	0.979021	0.9875	0	0	1	0.942857	0	0
63650056	A	C	C	C	C	C	C	0.923077	1	0.931034	1	1	0.962963	13	2	29	2	5	27	1	0	0	0	0	0.303571	0	0	0.969697	0.467811	1	1
92386262	T	C	C	C	C	C	C	0.327273	0.3	0.555556	0.352941	0.555556	0.351351	55	40	9	17	9	37	0.5	0.296296	0	0	0	0	0	0	0.285714	0.285714	0	0
13294696	G	A	A	A	A	A	A	1	1	1	1	1	0.666667	2	16	13	8	9	21	0.5	1	0.428571	0.3125	0	0.357143	0	1	1	0	0	0
21265277	C	T	T	T	T	T	T	1	1	1	1	1	1	9	4	5	2	3	9	1	0	1	1	0	0	0	1	0	0.333333	0.6	0
36989381	C	T	T	T	T	T	T	0.4	1	1	1	0.428571	1	15	11	10	21	7	30	1	0	0	0	0	0.466667	0	0	0.545455	0	0.75	1
15862922	C	T	T	T	T	T	T	1	0.448	0.5625	1	0.467949	1	217	125	48	217	156	137	0	0	0	0	0.487805	0.460993	0.584906	0.480263	0	0	1	0.4
97864351	T	C	C	C	C	C	C	0.466667	0.3	0.818182	0.3125	0.5	0.666667	15	20	11	16	4	6	0.5	1	0	0	0	0.5	0	0	0	0	0	0
3024877	T	C	C	C	C	C	C	1	1	1	1	1	1	104	69	20	94	42	75	0	1	0	0	1	1	0	0	1	0.936508	0	0
61447225	T	C	C	C	C	C	C	1	1	1	1	1	1	18	15	18	10	23	37	0	1	0.818182	0.354839	0.8	0.285714	0.666667	0	0.230769	0.307692	0	0.473684
53257255	G	A	A	A	A	A	A	1	0.833333	1	1	0.8	1	10	6	11	3	5	14	1	0	0.333333	0.5	1	0	0	0	0	0.6	0.538462	0.6
14990189	T	C	C	C	C	C	C	1	1	1	1	1	1	18	8	2	4	2	2	1	1	0	0	0	1	0.444444	0	0	0	1	0.5
22556550	C	T	T	T	T	T	T	1	0.777778	1	1	0.8	1	7	18	25	9	5	28	0	0.34375	0	0	0	1	1	0.75	0.428571	0	1	0
51327357	A	C	C	C	C	C	C	0.966667	1	0.47619	1	1	1	30	19	21	20	16	17	1	0	0	0	0	0.5	0	1	0	0.461538	0.428571	1
57980020	A	G	G	G	G	G	G	1	0.653846	1	0.55814	1	0.454545	20	26	4	86	29	55	0	0	0	0	0.482993	1	0	0.52439	0.522449	0.566667	0	0.519231
36758044	C	G	G	G	G	G	G	1	0.714286	1	1	0.8	1	5	7	8	6	5	9	0	0	1	1	0	0	0.8	0	0	0.666667	1	0
63650066	C	T	T	T	T	T	T	1	1	0.935484	1	1	0.967742	13	2	31	4	5	31	1	0	0	0	0	0.366864	0	0	1	0.48996	1	1
9783833	A	G	G	G	G	G	G	1	1	0.666667	0.65	1	1	15	19	3	20	18	29	0.357143	0	0	0	0.68	1	0.333333	1	0	0.2	0.7	0
7115363	A	T	T	T	T	T	T	0.5625	0.490196	0.636364	1	0.7	0.4875	48	51	22	92	30	80	0	0.423358	0.666667	0.608696	0	0	0	0	0.625	0.51	0	0
786988	T	C	C	C	C	C	C	0.296296	1	0.540984	1	1	0.644444	27	39	61	39	48	45	0.471698	0.586207	0	0	0	0	0.509434	0.4	1	0.472222	0	0
12976199	C	T	T	T	T	T	T	1	1	1	1	1	1	4	4	5	3	6	3	0	1	0	0.625	0.333333	0	0	1	0	1	0	1
92386240	T	C	C	C	C	C	C	0.358491	0.357143	0.666667	0.6	0.333333	0.44	53	28	6	15	9	25	0.666667	0.380952	0.666667	0	0	0	0	0	0	0	0	0
127755566	A	G	G	G	G	G	G	1	1	0.439103	0.508065	1	1	339	192	312	124	248	325	0	0.530864	0.469697	0.491639	0.474576	0.649123	0	0	0.608696	0.148936	0.532934	0
8195908	G	A	A	A	A	A	A	1	0.8	1	0.222222	1	1	2	5	6	9	12	7	0.357143	0.625	0	0	0	0	1	0	0	0	1	1
24096120	T	C	C	C	C	C	C	0.857143	0.888889	1	1	0.785714	0.8	7	18	3	18	14	10	0	0	0	0	0	0	0	1	0.916667	0.833333	0.666667	0.875
70334470	A	G	G	G	G	G	G	0.6	0.818182	0.666667	0.666667	0.411765	0.272727	10	22	3	21	17	22	0	0.214286	0.304348	0	0.444444	0	0.333333	0	0.35	0.75	0	0
1767406	A	G	G	G	G	G	G	0.996399	0.382038	0.431694	0.374558	0.439024	1	833	746	732	849	615	520	0.461214	0.442641	0.367781	0.480801	0	0.383639	0	0	0	0.449893	0	0
72497584	T	G	G	G	G	G	G	0.875	1	0.555556	0.5	0.692308	0.727273	8	4	9	6	13	11	0.4	0	0	0	0	0	0.666667	0	0.5	1	0.75	0
12186120	G	C	C	C	C	C	C	0.45	1	1	0.945946	1	0.409091	20	16	2	37	17	22	1	0.657143	0.541667	0.606383	0.3	0	0	0	0	0.333333	0.333333	0
79770330	G	A	A	A	A	A	A	1	1	1	0.333333	1	0.444444	10	4	6	6	2	9	0	0	1	1	0	0	0	0	0	0.75	0	1
92386281	T	C	C	C	C	C	C	0.192308	0.157895	0.25	0.153846	0.333333	0.368421	52	38	8	13	6	38	0	0	0	0	0	0	0	0	0	0.428571	0	0
15470805	A	G	G	G	G	G	G	0.857143	1	1	1	0.4	1	7	5	4	2	5	9	0.333333	0.5	0	0.4	0	1	0	0	0	0	1	1
55187943	T	C	C	C	C	C	C	1	1	1	1	1	0.571429	8	13	4	4	17	7	1	1	0	0	0.714286	0	0	1	0.833333	0	0	0
79803891	C	T	T	T	T	T	T	1	1	0.8	0.571429	1	1	7	9	10	7	2	4	1	0.777778	0	0.684211	1	0.6	0	0	0	0.285714	0	0
98025048	G	C	C	C	C	C	C	1	0.3125	0.772727	1	0.461538	1	20	16	22	19	13	24	0	0	0	0.5	0.6	0.615385	0	0	1	0.578947	0.230769	0
103937975	G	A	A	A	A	A	A	0.971429	0.68	0.666667	0.7	0.549296	1	35	25	39	50	71	58	0.586207	0.714286	0.290909	0.483871	1	0	0	0.473684	0	0	0	0
42597401	C	T	T	T,A	T	T	T	1	1	1	1	1	1	9	2	9	6	9	9	0	0	1	1	0.8	0	0	0	0.181818	0	1	1
50431895	A	C	C	C	C	C	C	0.367089	0.989583	0.363636	0.440994	1	1	79	96	11	161	83	106	1	0.723077	0	0	0.538462	0	0.25	0	0	0.635417	0	0
2560005	T	G	G	G	G	G	A	1	0.666667	0.5	1	1	1	10	6	4	7	2	2	0.410256	0.657143	0.96	0.962264	0.575758	0.206897	0	0.384615	0	0	0	0
14568444	A	G	G	G	G	G	G	0.952381	0.888889	1	1	0.511628	0.940476	105	36	130	45	43	336	0	0.684211	0	0	0	0	0	1	0.820896	0.826087	0	0.955056
7118360	G	C	C	C	C	C	C	1	0.5	0.777778	1	0.571429	0.386364	13	20	9	33	28	44	0.451613	0.558824	0.285714	0.4	0	0	0.384615	0	0.666667	0.481481	0	0
46407588	T	C	C	C	C	C	C	1	0.444444	1	1	0.555556	1	10	9	11	18	18	28	0.375	0.6	0	0	1	0	0.444444	0	0	0.428571	0.590909	0.555556
79323068	T	C	C	C	C	C	C	1	0.285714	0.333333	1	1	0.9	2	7	6	8	5	10	0	0	0.4	0.363636	0	0	1	0	0	0	0.75	1
7114036	C	G	G	G	G	G	G	0.545455	0.397059	0.6	1	0.486842	0.441558	88	68	30	137	76	154	0	0.364198	0.589474	0.580645	0	0	0	0	0.471204	0.461538	0	0
70201306	T	C	C	C	C	C	C	1	1	0.5	0.7	0.333333	1	9	3	6	10	9	26	0	1	0	1	0	1	0	0	0	0	0.533333	0
1228972	A	C	C	C	C	C	C	1	1	1	1	1	1	4	3	15	2	3	8	0	0	1	0	1	0	0	0	0	1	1	1
7815282	G	A	A	A	A	A	A	1	1	1	1	1	1	13	6	8	7	5	4	0	0	0	0	1	1	0	0	1	1	0	1
16165867	C	T	T	T	T	T	T	1	1	1	1	1	1	3	2	2	2	3	4	0	1	1	1	1	0	0	0	0	0	1	0
70889111	G	C	C	C	C,A	C	C	1	1	1	1	1	1	3	4	4	6	2	2	1	1	0	0	1	0	0	0	0	1	1	0
6781537	T	C	C	C	C	C	C	1	1	1	1	1	1	2	6	14	3	9	11	1	0	0	0	0	1	1	0	0	1	1	0
22669731	A	G	G	G	G	G	G	1	1	1	1	1	1	4	3	6	4	2	5	1	0	1	1	0	0	0	1	0	1	0	0
3436407	T	C	C	C	C	C	C	1	1	1	1	1	1	4	8	14	2	2	2	0	0	1	0	0	0	1	1	0	1	0	1
36580366	G	A	A	A	A	A	A	1	1	1	1	1	1	2	8	2	4	3	3	0	0	1	1	0	0	0	1	1	1	0	0
55843049	T	C	C	C	C	C	C	1	1	1	1	1	1	4	2	6	3	2	2	0	0	1	0	0	1	0	0	1	0	1	1
997490	G	A	A	A	A	A	A	1	1	1	1	1	1	8	8	9	5	3	2	0	0	0	0	0	1	1	0	0	1	1	1
1304327	C	A	A	A	A	A	A	1	1	1	1	1	1	11	2	2	3	8	3	0	0	1	1	0	1	0	0	0	1	1	0
19282255	A	G	G	G	G	G	G	0.5	1	1	1	1	1	6	4	20	8	2	7	0	1	1	1	1	0	0	0	0	0	0	0.5
21982656	A	T	T	T	T	T	T	1	1	1	1	1	1	6	4	2	5	6	6	1	1	1	1	0	0	0	0	1	0	0	0
21982657	A	T	T	T	T	T	T	1	1	1	1	1	1	6	4	2	5	6	5	1	1	1	1	0	0	0	0	1	0	0	0
81319562	G	C	C	C	C	C	C	1	1	1	1	1	1	12	6	6	6	2	2	0	1	0	1	0	0	0	0	0	1	1	1
55513417	A	G	G	G	G	G	G	1	1	1	1	1	1	3	2	2	6	4	6	1	0	0	1	0	1	0	1	0	0	0	1
55513454	C	G	G	G	G	G	G	1	1	1	1	1	1	5	2	2	5	4	7	1	0	0	1	1	1	0	0	0	0	0	1
69952151	T	C	C	C	C	C	C	1	1	1	1	1	1	8	16	4	24	8	14	0	0	0	0	0	0	0	1	1	1	1	1
84289421	T	C	C	C	C	C	C	1	1	1	1	1	1	10	4	9	3	4	6	0	1	0	0	1	1	0	0	1	0	1	0
84289435	T	C	C	C	C	C	C	1	1	1	1	1	1	11	4	12	3	4	7	0	1	0	0	1	1	0	0	1	0	1	0
84289449	T	C	C	C	C	C	C	1	1	1	1	1	1	12	4	14	5	4	8	0	1	0	0	1	1	0	0	1	0	1	0
22813418	G	T	T	T	T	T	T	1	1	1	1	1	1	3	6	4	3	3	2	1	0	1	1	0	0	0	0	1	0	0	1
48513830	G	T	T	T	T	T	T	1	1	1	1	1	1	12	4	8	10	6	4	0	0	0	0	1	0	0	1	1	1	0	1
54848196	T	G	G	G	G	G	G	1	1	1	1	1	1	8	3	7	4	8	2	1	1	1	1	0	0	0	0	0	0	1	0
67469525	G	A	A	A	A	A	A	1	1	1	1	1	1	14	2	4	2	2	6	1	0	1	1	0	0	0	0	1	0	1	0
46535970	C	T	T	T	T	T	T	1	1	1	1	1	1	2	6	2	4	2	6	0	0	1	1	0	0	0	0	1	0	1	1
68053728	G	C	C	C	C	C	C	1	1	1	1	1	1	4	2	2	2	14	11	0	0	1	0	0	0	0	1	1	1	0	1
1542921	A	G	G	G	G	G	G	1	1	1	1	1	1	6	6	8	3	2	5	0	0	0	1	0	1	0	0	1	1	1	0
64229060	A	G	G	G	G	G	G	1	1	1	1	1	1	4	12	10	3	4	10	0	0	1	0	0	0	0	1	1	1	1	0
65317263	C	T	T	T	T	T	T	1	1	1	1	1	1	4	9	3	5	2	4	1	0	0	1	0	0	0	1	1	0	1	0
68427252	C	T	T	T	T	T	T	1	1	1	1	1	1	6	4	5	4	2	7	0	0	1	0	1	1	1	0	1	0	0	0
68427336	C	A	A	A	A	A	A	1	1	1	1	1	1	3	2	16	3	8	2	0	1	1	1	0	1	1	0	0	0	0	0
32386273	C	T,A	T	T	T	T	T	1	1	1	1	1	1	4	8	2	9	2	2	1	1	0	0	0	0	0	1	0	1	0	1
65831282	T	C	C	C	C	C	C	1	1	1	1	1	1	3	2	2	2	11	5	1	1	1	1	1	0	0	0	0	0	0	0
5441739	G	C	C	C	C	C	C	1	1	1	1	1	1	19	7	4	9	4	5	1	0	0	0	0	1	0	0	1	0	1	1
5441759	A	G	G	G	G	G	G	1	1	1	1	1	1	17	11	3	7	4	3	1	0	0	0	0	1	0	0	1	0	1	1
28404732	C	T	T,A	T	T	T	T	1	1	1	1	1	1	2	6	7	5	9	12	1	0	0	0	1	0	0	0	1	1	0	1
37571861	A	G	G	G	G	G	G	1	1	1	1	1	1	6	6	6	3	4	6	1	0	0	0	0	1	0	0	1	1	0	1
79780029	T	C	C	C	C	C	C	1	1	1	1	1	1	5	7	3	6	4	4	0	0	1	1	0	0	0	0	0	1	1	1
55662000	A	G	G	G	G	G	G	1	1	1	1	1	1	4	3	6	2	2	5	0	0	0	0	0	1	0	1	1	1	0	1
23888459	T	C	C	C	C	C	C	1	1	1	1	1	1	7	8	12	9	9	7	0	0	1	0	0	0	0	1	1	1	1	0
11011617	C	T	T	T	T	T	T	1	1	1	1	1	1	8	6	8	4	15	3	1	0	0	0	0	1	0	0	1	1	0	1
11196738	T	C	C	C	C	C	C	1	1	1	1	1	1	5	8	7	8	5	8	1	0	0	0	0	1	1	0	1	1	0	0
44533673	N	T	T	T	T	T	T	1	1	1	1	1	1	10	7	6	2	4	5	1	1	1	0	1	0	0	0	0	0	0	1
44533674	N	G	G	G	G	G	G	1	1	1	1	1	1	11	8	6	2	4	5	1	1	1	0	1	0	0	0	0	0	0	1
60352314	A	G	G	G	G	G	G	1	1	1	1	1	1	2	8	2	3	10	12	0	0	0	1	0	1	0	0	1	1	0	1
47111426	T	C	C	C	C	C	C	1	1	1	1	1	1	12	8	7	7	4	8	1	1	0	0	0	1	0	0	1	0	0	1
30672195	G	A	A	A	A	A	A	1	1	1	1	1	1	9	17	6	5	5	10	0	0	1	0	0	0	1	0	1	0	1	1
32931021	N	T	T	T	T	T	T	1	1	1	1	1	1	7	14	10	5	2	3	0	1	1	1	0	0	0	0	1	0	1	0
66270574	N	C	C	C	C	C	C	1	1	1	1	1	1	26	10	11	7	7	29	0	0	0	0	0	0	0	1	1	1	1	1
105338677	N	G,C	G	G	G	G	G	1	1	1	1	1	1	15	11	9	13	2	4	1	1	0	0	1	0	0	1	1	0	0	0
120725151	A	G	G	G	G,T	G	G	1	1	1	1	1	1	15	9	2	16	2	12	0	0	0	0	0	1	1	0	1	1	0	1
15247404	A	G	G	G	G	G	G	1	1	1	1	1	1	5	9	3	7	3	3	0	0	0	1	1	0	0	0	0	1	1	1
46970333	G	T	T	T	T	T	T	1	1	1	1	1	1	2	3	7	2	2	4	0	0	0	0	0	0	1	0	1	1	1	1
23675781	C	T	T	T	T	T	T	1	1	1	1	1	1	4	3	5	5	3	4	1	0	0	0	0	0	1	1	0	1	1	0
33092975	G	T	T	T	T	T	T	1	1	1	1	1	1	2	2	8	2	2	7	1	0	1	1	0	1	0	0	0	1	0	0
77400698	A	G	G	G	G	G	G	1	1	1	1	1	1	6	7	9	2	5	3	0	0	0	1	0	1	0	0	1	1	1	0
113567029	N	T	T,C	T	T	T	T	1	1	1	1	1	1	2	4	3	3	8	6	0	1	0	0	0	0	0	1	1	0	1	1
115183771	G	T	T	T	T	T	T	1	1	1	1	1	1	2	4	5	2	8	3	1	1	0	1	0	0	0	0	1	0	0	1
42246542	T	A	A	A	A	A	A	1	1	1	1	1	1	10	4	5	6	3	20	0	0	0	0	0	1	0	0	1	1	1	1
68720853	C	T	T	T	T	T	T	1	1	1	1	1	1	11	11	4	2	8	5	0	0	0	0	0	0	0	1	1	1	1	1
83637382	A	G	G	G	G	G	G	1	1	1	1	1	1	14	8	2	7	3	9	1	0	0	1	0	1	0	1	0	0	1	0
87037582	C	T	T	T	T	T	T	1	1	1	1	1	1	12	7	8	2	3	3	1	0	0	0	1	0	0	1	1	0	1	0
117154178	T	C	C	C	C	C	C	1	1	1	1	1	1	4	6	12	5	16	14	0	1	0	1	1	1	0	0	0	1	0	0
86474161	T	A	A	A	A	A	A	1	1	1	1	1	1	3	9	2	5	5	4	0	0	0	0	0	0	0	1	1	1	1	1
101220690	C	T	T	T	T	T	T	1	1	1	1	1	1	6	3	7	3	2	3	1	0	0	0	0	1	1	0	0	1	1	0
101220693	G	A	A	A	A	A	A	1	1	1	1	1	1	5	2	8	3	2	3	1	0	0	0	0	1	1	0	0	1	1	0
67810011	C	G	G	G	G	G	G	1	1	1	1	1	1	2	3	9	2	4	8	1	0	0	1	0	0	0	1	1	0	0	1
70459528	C	T	T	T	T	T	T	1	1	1	1	1	1	4	4	8	2	2	4	0	0	0	1	1	1	0	0	0	1	1	0
111414150	A	G	G	G	G	G	G,T	1	1	1	1	1	1	4	6	4	12	10	5	0	1	0	0	0	0	0	1	0	1	1	1
111414199	T	A	A	A	A	A	A	1	1	1	1	1	1	6	5	4	12	10	8	0	1	0	0	0	0	0	1	0	1	1	1
49903564	T	C	C	C	C	C	C	1	1	1	1	1	1	4	2	22	2	2	3	0	0	0	0	0	0	1	1	1	1	1	0
3756262	C	A	A	A	A	A	A	1	1	1	1	1	1	9	6	5	6	11	10	0	0	0	0	1	0	0	1	0	1	1	1
15157047	C	A	A	A	A	A	A	1	1	1	1	1	1	3	4	4	2	3	4	1	1	0	1	1	0	0	0	1	0	0	0
36680398	T	C	C	C	C	C	C	1	1	1	1	1	1	2	3	17	2	2	3	1	0	0	0	0	1	0	0	1	1	1	0
82353374	T	C	C	C	C	C	C	1	1	1	1	1	1	2	6	1	6	2	5	0	1	0	0	1	0	0	0	1	0	1	1
82353376	T	C	C	C	C	C	C	1	1	1	1	1	1	2	6	2	6	2	5	0	1	0	0	1	0	0	0	1	0	1	1
82353378	A	G	G	G	G	G	G	1	1	1	1	1	1	2	6	2	6	2	5	0	1	0	0	1	0	0	0	1	0	1	1
83077772	T	C	C	C	C	C	C	1	1	1	1	1	1	2	5	3	10	2	2	1	1	1	1	0	0	0	0	0	1	0	0
83077784	T	C	C	C	C	C	C	1	1	1	1	1	1	2	5	3	9	2	3	1	1	1	1	0	0	0	0	0	1	0	0
2496754	G	T	T	T	T	T	T	0.333333	0.764706	1	1	0.703704	0.541667	27	17	11	18	27	24	0.391304	0.333333	0	0	0.333333	0.6	0.478261	0.692308	0.515152	0	0	0
57246869	A	G	G	G	G	G	G	0.4	0.333333	0.294118	0.666667	0.5	0.571429	5	9	17	3	10	7	0	0	0.8	0.538462	0	0	0	0	0.428571	0	0	0
16326502	T	C	C	C	C	C	C	1	0.333333	0.444444	0.909091	0.8	1	3	6	9	11	5	11	0	0.6	0	0	0	0	0	0.222222	0	1	1	0.666667
8594141	C	T	T	T	T	T	T	0.59322	1	0.761905	0.395833	1	1	59	44	21	48	22	68	1	0	0.3125	0.510638	0.769231	0.222222	0.4	0	0	0	0	0.538462
74717056	A	G	G	G	G	G	G	0.888889	1	0.272727	1	1	1	9	2	11	7	3	13	1	0.4	0.5	0	0.333333	0	0.6	0	0.333333	1	0	0
27600729	T	C	C	C	C	C	C	0.8	1	1	0.75	1	1	5	5	6	4	7	13	0.555556	1	0	0	0	1	0	0	1	1	0	0
22488301	C	G	G	G	G	G	G	1	1	1	0.95	1	1	12	12	6	20	12	24	1	0.384615	0.5	0.294118	0.333333	0	0.666667	0	0	0.277778	1	0.5
24973472	C	G	G	G	G	G	G	0.266667	0.145161	0.529412	1	0.666667	1	30	62	17	7	3	7	0	0	0	0	0	0	1	0	0.615385	0	0	1
48563017	T	C	C	C	C	C	C	0.391304	1	1	1	1	0.973684	46	44	13	31	37	38	1	0	0.425926	0.632653	0.364865	1	0	0	0.47619	0.473684	0	0
82171802	G	T	T	T	T	T	T	0.991734	0.501804	0.974332	0.49631	0.501328	0.489602	6291	5821	2805	6369	3766	4520	0	0.509538	0	0	0	0.48937	0.494722	0	0	0.981368	0.491335	0
113618555	C	T	T	T	T	T	T	0.257576	0.112676	0.153846	0.314286	0.472527	0.16129	66	71	13	70	91	31	0	0	0	0	0	0	0.275862	0	0	0	0.208333	0
40385224	C	A	A	A	A	A	A	0.615385	1	1	1	1	1	13	15	11	16	26	33	1	0	0	0	0	0.514286	1	0	1	0.483871	0	0.62963
7814823	T	A	A	A	A	A	A	1	0.612903	0.5	1	1	1	42	31	10	14	6	29	0.333333	0	0	0	0.4	1	0	0.5	0.615385	0.777778	0.5	0
60724611	G	T	T	T	T	T	T	0.28	0.375	0.344828	0.333333	0.25	0.30303	25	16	29	12	8	33	0	0	0.4	0.5	0	0	0	0	0	0	0	0
49616830	T	C	C	C	C	C,A	C	0.983871	1	1	1	1	1	62	33	22	8	4	13	1	0	0	0	0	1	0	1	1	0	1	0
15856421	T	C	C	C	C	C	C	1	0.566038	0.645161	1	0.539683	1	108	53	31	139	63	75	0	0	0	0	0.442748	0.730435	0.352941	0.598039	0	0	1	0.642857
8942111	A	G	G	G	G	G	G	1	1	1	0.363636	1	1	11	12	2	11	16	14	0.3	0.666667	0.214286	0.5	0	1	0	0.461538	0.571429	0.666667	0	0
7114034	T	C	C	C	C	C	C	0.551724	0.405797	0.612903	1	0.486486	0.458065	87	69	31	138	74	155	0	0.37037	0.610526	0.609589	0	0	0	0	0.479167	0.465649	0	0
119761453	A	G	G	G	G	G	G	0.4	0.666667	0.615385	0.571429	0.6	0.333333	5	3	13	7	5	6	0.5	0.333333	0	0.875	0	0	0	0	0	0	0	0.5
35492657	T	C	C	C	C	C	C	0.5	1	0.5	1	1	0.727273	12	9	6	7	7	11	0	0	0	0	1	0	0	1	0	0.75	1	0
31095934	T	C	C	C	C	C	C	0.789474	1	1	1	1	1	19	24	10	12	27	41	0.586957	1	0.390244	0.571429	0	0.5	1	0.375	0	0	0	0.388889
18662641	T	G	G	G	G	G	G	1	0.833333	1	1	1	1	10	6	4	2	6	7	1	0	0	1	0	0	0	0	0.857143	0	1	1
37954267	A	G	G	G	G	G	G	0.636364	1	0.928571	1	1	0.567568	22	13	14	6	7	37	1	0	0.444444	0	1	1	0	0	0	0.142857	0	0.571429
82171949	C	T	T	T	T	T	T	0.998447	0.485511	0.991955	0.487652	0.490102	0.485057	5794	5763	2859	6236	3738	4216	0	0.501111	0	0	0	0.490781	0.488487	0	0	0.993829	0.491446	0
73860025	G	A	A	A	A	A	A	0.8	1	1	1	1	0.59375	15	17	27	13	6	32	1	0.740741	0	0.478261	0.333333	0	0	1	0	0.5	0	0.368421
39664519	C	A	A	A	A	A	A	0.424242	0.333333	0.458333	0.4375	1	0.425	33	27	24	16	77	80	0	0.413793	0	0.240741	0.317073	0	0.272727	0	0	0	0.461538	0.4
59699459	T	C	C	C	C	C	C	0.2	0.75	1	1	1	0.583333	10	8	19	9	19	12	0.7	0	0	0	0.4	1	0.461538	0	0	0	1	0
34140093	G	C	C	C	C	C	C	1	1	1	1	0.275862	1	5	2	6	8	29	16	0	1	0.416667	0.3	0.454545	1	0	0	0.333333	0.8	0	0
8593545	G	C	C	C	C	C	C	0.666667	1	1	1	1	1	18	13	23	24	5	34	1	0	0	0.233333	0.689655	1	0.55	0	0.782609	0	0	0.44
50565398	G	C	C	C	C	C	C	0.990291	0.724919	0.963636	0.929412	0.990698	0.766234	103	309	55	170	215	231	0.175824	0.240964	0.62069	0	0.477273	0	0.695652	0	0.394595	0.766667	0.647887	0.375
45571253	C	T	T	T	T	T	T	0.439024	0.291667	0.771429	0.515152	0.533333	0.5	41	48	35	66	45	70	0	0	0	0	0	0	0.580645	0.392857	0	0	0.666667	0.44
81126846	C	A	A	A	A	A	A	0.236842	0.3	0.304348	0.333333	0.32	0.235294	38	30	23	12	25	17	0	0	0	0	0	0	0	0	0	0.307692	0	0.454545
23865525	T	C	C	C	C	C	C	0.583333	0.535714	0.533333	0.25	0.307692	0.588235	24	28	15	16	13	17	0	0	0	0	0.5	0	0	0.5	0.545455	0	0.285714	0
20129736	A	C	C	C	C	C	C	1	1	0.529412	1	1	1	23	15	17	17	5	20	0.36	0	0	0.266667	1	0	0.5625	0	0.625	0	0.75	1
5875651	T	C	C	C	C	C	C	0.4	0.533333	0.653846	1	1	1	25	15	52	12	35	44	0	0.307692	0	0	0.285714	0	0.26087	0	0.805556	0.4	1	0.5625
7114041	C	T	T	T	T	T	T	0.554217	0.397059	0.607143	1	0.506667	0.443709	83	68	28	135	75	151	0	0.375796	0.597826	0.611842	0	0	0	0	0.486188	0.472441	0	0
57502301	T	C	C	C	C	C	C	0.545455	0.818182	0.2	1	0.4	0.428571	11	11	10	4	5	14	0	0	0	0	0	0	0	0	1	1	0.428571	0
38512353	C	A	A	A	A	A	A	0.73913	0.75	0.8	1	0.818182	1	23	8	5	21	11	42	0.487179	0.62069	0	0	0	0.52	0	0	1	0.62963	0.888889	0
31984942	A	C	C	G	G	C	C	0.5	1	0.25	0.222222	1	1	6	13	8	9	6	4	0.846154	0	0	0.357143	0	0	0.333333	1	0.333333	0	0.142857	0
7475869	T	A	A	A	A	A	A	1	1	0.5	0.4375	0.428571	1	7	7	4	16	14	14	1	0.4	0	0	0.227273	1	0	0.529412	0	0	0.25	0
20696104	G	C	C	C	C	C	C	1	0.833333	1	1	0.428571	0.571429	3	6	3	7	7	7	0	0	0	0	0	0	0	1	1	0.875	0	1
114611577	T	C	C	C	C	C	C	0.575342	1	0.72	0.441176	0.480519	0.491525	73	76	25	102	77	59	0	0.280702	0.62069	0.386364	0.46875	0.527778	0	0	0	0	0.466667	0
15430926	C	T	T	T	T	T	T	0.5	0.52381	0.684211	0.777778	0.777778	1	28	21	19	9	9	17	0	1	0.5	0.533333	1	0.272727	0	0	0	0	0	0
59024453	T	C	C	C	C	C	C	0.666667	1	1	1	1	0.571429	6	3	2	5	2	7	0	0.714286	0.6	0.8	0	0	0.666667	0	0	1	0.5	0
35599015	C	A	A	A	A	A	A	0.263158	0.333333	1	0.222222	0.428571	0.361111	19	48	2	9	21	36	0.266667	0	0	0	0	0.8	0	0.228571	0.36	0	0	0
1486925	G	A	A,C	A	A	A	A	1	1	1	1	1	1	15	12	4	15	6	5	1	1	0.75	1	0	0	0	0.25	0.714286	0	0	0.333333
60532165	T	C	C	C	C	C	C	1	1	1	0.333333	1	1	2	2	4	6	3	5	1	0	1	0	0	0	0.714286	0	0	0.666667	1	0
90302179	A	G	G	G	G	G	G	0.368421	0.357143	0.416667	0.230769	0.258065	0.15	19	28	36	26	31	20	0	0.4	0	0	0	0	0	0	0	0.181818	0.25	0
37327076	C	T	T	T	T	T	T	1	1	1	1	1	1	13	28	7	24	15	21	0.410256	1	0	0	1	0.611111	0	0	0.28125	0.5	1	0.25
27686363	C	T	T	T	T	T	T	0.461538	1	0.384615	1	1	0.470588	13	4	13	2	2	17	0	1	1	1	0	0	0	0	0	0.375	0	0
121237188	T	C	C	C	C	C	C	0.72	1	0.666667	0.515152	0.393939	1	25	35	30	33	33	37	0.509804	0.729167	0.4	0.447368	0.230769	0.448276	0	0	0.589744	0	0	0
119750461	A	G	G	G	G	G	G	0.714286	0.5	1	1	1	0.857143	7	8	3	14	5	14	0.464286	1	0	0.5	0	0.5	0	0	0	1	0.666667	0
66649462	A	G	G	G	G	G	G	1	1	1	1	1	1	23	18	38	6	17	71	0	0	0	1	1	0	0	1	0.764706	0.6875	0.607843	0
121237564	A	G	G	G	G	G	G	0.534884	1	0.490566	0.568966	0.522727	1	43	47	53	58	44	46	0.540541	0.46	0.266667	0.436364	0.358974	0.625	0	0	0.491228	0	0	0
87280629	G	A	A	A	A	A	A	0.485714	0.588235	0.457143	0.564103	1	0.654762	70	51	35	39	36	84	0	0	0.590909	0.578947	0.641975	1	0	0	0	0	0	0
19339472	C	T	T	T	T	T	T	0.5	0.5	1	0.5	1	1	8	6	5	8	10	22	1	0	0	0	0.263158	1	0.9	0	0	0.4	0	0
14419091	G	T	T	T	T	T	T	1	0.666667	0.25	0.727273	1	0.4	14	15	28	11	4	15	0	0.5	0.446809	0.311475	0	0	0	0	0.44	0	1	0.411765
98025053	G	A	A	A	A	A	A	1	0.333333	0.809524	1	0.466667	1	21	18	21	21	15	26	0	0	0	0.625	0.6	0.642857	0	0	1	0.578947	0.230769	0
6882103	A	G	G	G	G	G	G	0.2	0.333333	0.235294	0.272727	0.428571	0.333333	20	12	17	11	14	6	0	0	0.2	0.266667	0	0	0	0	0	0	0.405405	0
18854546	G	C	A	A	A	A	A	0.4	0.153846	0.909091	1	1	0.761905	5	13	11	3	7	21	0	0.666667	0.8	0.702703	0	0.4	0	0	0	0	0	0.727273
1777230	T	C	C	C	C	C	C	1	0.425532	0.630435	0.421739	0.589404	1	131	141	46	230	151	104	0.578544	0.565574	0.5125	0.56	0	0.280702	0	0	0	0.641975	0	0
[truncated: 26,196 more rows]
