# Supplementary material for: Single nucleotide polymorphism discovery in bovine liver using RNA-seq technology
Source: PLoS One. 2017 Feb 24;12(2):e0172687. doi: 10.1371/journal.pone.0172687 (PMC5325534; doi:10.1371/journal.pone.0172687)
Supplement: S28 Table — (XLSX) [file pone.0172687.s028.xlsx]

## Sheet: 4.100%
S28 Table: SNPs filtering data set with SNP ratio = 100% of Polish Red breed.
LOCUS	REF	CP 19	CP 20	CP 21	CP 22	CP 23	CP 24	SNP% CP19	SNP% CP20	SNP% CP21	SNP% CP22	SNP% CP23	SNP% CP24	READS CP19	READS CP20	READS CP21	READS CP22	READS CP23	READS CP24	SNP% CP27	SNP% CP28	SNP% CP29	SNP% CP30	SNP% CP31	SNP% CP32	SNP% CP35	SNP% CP36	SNP% CP37	SNP% CP38	SNP% CP39	SNP% CP40
60196336	C	T	T	T	T	T	T	1	1	1	1	1	1	17	8	31	49	8	26	0	0	0	0	0	0	0	0	0	0	0	0
19434984	C	T	T	T	T	T	T	1	1	1	1	1	1	11	19	3	37	27	15	0	0	0	0	0	0	0	0	0	0	0	0		READS CP19	READS CP20	READS CP21	READS CP22	READS CP23	READS CP24
5866918	G	A	A	A	A	A	A	1	1	1	1	1	1	2	3	3	2	3	26	0	0	0	0	0	0	0	0	0	0	0	0		>4	>4	>4	>4	>4	>4
52395354	T	C	C	C	C	C	C	1	1	1	1	1	1	7	4	2	13	4	6	0	0	0	0	0	0	0	0	0	0	0	0
240781	G	C	C	C	C	C	C	1	1	1	1	1	1	20	4	1	8	7	4	0	0	0	0	0	0	0	0	0	0	0	0
92435822	G	T	T	T	T	T	T	1	1	1	1	1	1	5	11	6	4	3	6	0	0	0	0	0	0	0	0	0	0	0	0
9416973	T	G	G	G	G	G	G	1	1	1	1	1	1	8	4	6	3	4	6	0	0	0	0	0	0	0.285714	0	0	0	0	0
32637188	C	T	T	T	T	T	T	1	1	1	1	1	1	2	7	6	13	3	13	0	0	0	0	0	0	0	0.25	0.375	0	0	0
62288404	C	A	A	A	A	A	A	1	1	1	1	1	1	3	4	3	3	6	4	0	0	0	0	0	0	0	0	0	0	0	0.75
32765070	G	A	A	A	A	A	A	1	1	1	1	1	1	17	3	7	21	6	6	0	0	0	0	0	0	0	0.833333	0	0	0	0
83463296	C	G	G	G	G	G	G	1	1	1	1	1	1	9	5	4	12	2	3	0	0	0	0	0	0	0	0	0	0	0.9	0
26157888	C	G	G	G	G	G	G	1	1	1	1	1	1	6	2	12	9	5	12	0	0	0	0	0	1	0	0	0	0	0	0
45453520	T	C	C	C	C	C	C	1	1	1	1	1	1	3	2	3	8	2	1	0	0	0	1	0	0	0	0	0	0	0	0
45453556	T	C	C	C	C	C	C	1	1	1	1	1	1	3	2	5	8	2	1	0	0	0	1	0	0	0	0	0	0	0	0
2792375	C	T	T	T	T	T	T	1	1	1	1	1	1	2	2	4	3	2	4	0	0	1	0	0	0	0	0	0	0	0	0
87064478	C	T	T	T	T	T	T	1	1	1	1	1	1	35	11	2	28	21	15	1	0	0	0	0	0	0	0	0	0	0	0
5571342	T	A	A	A	A	A	A	1	1	1	1	1	1	7	2	3	8	4	12	0	0	1	0	0	0	0	0	0	0	0	0
35204599	G	A	A	A	A	A	A	1	1	1	1	1	1	3	2	4	2	5	12	0	0	1	0	0	0	0	0	0	0	0	0
43860175	G	C	C	C	C	C	C	1	1	1	1	1	1	2	5	5	3	2	2	0	0	0	0	0	1	0	0	0	0	0	0
10430699	A	C	C	C	C	C	C	1	1	1	1	1	1	3	4	6	5	2	3	0	0	0	0	1	0	0	0	0	0	0	0
11085293	C	T	T	T	T	T	T	1	1	1	1	1	1	13	14	6	11	2	6	0	0	1	0	0	0	0	0	0	0	0	0
6101381	A	G	G	G	G	G	G	1	1	1	1	1	1	20	10	4	2	10	16	0	0	1	0	0	0	0	0	0	0	0	0
10114005	C	T	T	T	T	T	T	1	1	1	1	1	1	7	7	6	3	5	8	0	0	1	0	0	0	0	0	0	0	0	0
101019977	G	A	A	A	A	A	A	1	1	1	1	1	1	4	12	4	5	7	21	0	0	0	0	1	0	0	0	0	0	0	0
38269535	G	A	A	A	A	A	A	1	1	1	1	1	1	7	10	6	9	5	12	0	0	1	0	0	0	0	0	0	0	0	0
100091359	T	C	C	C	C	C	C	1	1	1	1	1	1	10	2	2	7	7	6	0	0	0	1	0	0	0	0	0	0	0	0
100091369	G	A	A	A	A	A	A	1	1	1	1	1	1	10	2	3	4	7	6	0	0	0	1	0	0	0	0	0	0	0	0
104675283	T	G	G	G	G	G	G	1	1	1	1	1	1	28	4	2	4	5	2	0	0	0	0	1	0	0	0	0	0	0	0
109721625	G	C	C	C	C	C	C	1	1	1	1	1	1	5	2	2	2	4	2	0	0	0	1	0	0	0	0	0	0	0	0
1792819	T	C	C	C	C	C	C	1	1	1	1	1	1	3	2	5	9	4	9	0	0	0	0	1	0	0	0	0	0	0	0
6013493	T	C	C	C	C	C	C	1	1	1	1	1	1	2	4	2	12	2	4	0	0	0	0	0	0	0	1	0	0	0	0
36903676	T	C	C	C	C	C	C	1	1	1	1	1	1	11	14	4	3	18	13	0	0	0	0	0	0	0	0	0	0	1	0
25966080	T	C	C	C	C	C	C	1	1	1	1	1	1	6	2	3	11	3	2	0	0	0	0	0	0	0	0	0	1	0	0
89835284	C	A	A	A	A	A	A	1	1	1	1	1	1	6	2	3	5	2	7	0	0	0	0	0	0	0	0	0	1	0	0
46482878	C	A	A	A	A	A	A	1	1	1	1	1	1	3	4	14	10	3	3	0	0	0	0	0	0	0	0	0	1	0	0
60195938	G	A	A	A	A	A	A	1	1	1	1	1	1	31	28	14	24	18	23	0	0	0	0	0	0	1	0	0	0	0	0
60196998	C	T	T	T	T	T	T	1	1	1	1	1	1	23	30	19	23	7	37	0	0	0	0	0	0	1	0	0	0	0	0
60636928	C	A	A	A	A	A	A	1	1	1	1	1	1	3	1	2	6	3	8	0	0	0	0	0	0	0	0	0	0	0	1
4416214	A	G	G	G	G	G	G	1	1	1	1	1	1	2	3	6	5	2	10	0	0	0	0	0	0	0	0	0	0	0	1
53880500	T	C	C	C	C	C	C	1	1	1	1	1	1	15	17	14	9	3	8	0	0	0	0	0	0	0	0	0	0	0	1
6135743	A	T	T	T	T	T	T	1	1	1	1	1	1	4	6	35	28	9	32	0	0	0	0	0	0	0	0	0	0	0	1
46755318	A	G	G	G	G	G	G	1	1	1	1	1	1	11	16	7	21	4	19	0	0	0	0	0	0	0	0	0	0	0	1
46755319	A	G	G	G	G	G	G	1	1	1	1	1	1	11	16	5	21	4	19	0	0	0	0	0	0	0	0	0	0	0	1
29091271	G	C	C	C	C	C	C	1	1	1	1	1	1	6	2	3	5	2	3	0	0	0	0	0	0	0	0	0	0	0	1
60195652	A	T	T	T	T	T	T	1	1	1	1	1	1	32	14	31	61	18	16	0	0	0	0	0	0.181818	1	0	0	0	0	0
27079248	A	G	G	G	G	G	G	1	1	1	1	1	1	5	3	2	12	4	3	0	0	0	0	1	0	0	0	0	0	0	0.269231
71462365	G	A	A	A	A	A	A	1	1	1	1	1	1	9	8	2	7	1	4	0	0	1	0.307692	0	0	0	0	0	0	0	0
61242699	A	C	C	C	C	C	C	1	1	1	1	1	1	8	2	7	5	6	8	0	0	0.555556	0	0	1	0	0	0	0	0	0
5848501	T	A	A	A	A	A	A	1	1	1	1	1	1	2	11	20	23	6	85	0	0	0	0.6	1	0	0	0	0	0	0	0
29032201	G	T	T	T	T	T	T	1	1	1	1	1	1	2	4	2	7	8	2	0	0	0	0	0	0	1	0	0.615385	0	0	0
72937238	C	G	G	G	G	G	G	1	1	1	1	1	1	8	2	4	2	8	24	0.666667	0	1	0	0	0	0	0	0	0	0	0
241235	T	C	C	C	C	C	C	1	1	1	1	1	1	22	9	5	3	12	11	0	1	0	0.666667	0	0	0	0	0	0	0	0
72936925	C	T	T	T	T	T	T	1	1	1	1	1	1	9	10	2	4	8	6	0.857143	0	0	0	0	0	0	1	0	0	0	0
55906578	T	C	C	C	C	C	C	1	1	1	1	1	1	4	11	7	5	7	3	0	0	0	1	0	1	0	0	0	0	0	0
43796100	A	G	G	G	G	G	G	1	1	1	1	1	1	5	4	9	19	10	21	1	1	0	0	0	0	0	0	0	0	0	0
9814076	C	T	T	T	T	T	T	1	1	1	1	1	1	5	7	12	12	5	6	0	1	0	0	0	1	0	0	0	0	0	0
48871119	T	C	C	C	C	C	C	1	1	1	1	1	1	10	10	4	9	8	9	0	1	0	0	0	1	0	0	0	0	0	0
1747986	C	T	T	T	T	T	T	1	1	1	1	1	1	10	11	9	14	4	9	0	0	0	1	1	0	0	0	0	0	0	0
4236410	C	G	G	G	G	G	G	1	1	1	1	1	1	2	11	3	17	4	4	0	0	1	0	1	0	0	0	0	0	0	0
60604929	T	C	C	C	C	C	C	1	1	1	1	1	1	2	6	2	2	3	2	1	0	1	0	0	0	0	0	0	0	0	0
60604938	T	C	C	C	C	C	C	1	1	1	1	1	1	3	6	2	2	3	2	1	0	1	0	0	0	0	0	0	0	0	0
110726377	A	G	G	G	G	G	G	1	1	1	1	1	1	2	2	5	13	2	4	0	1	0	0	0	1	0	0	0	0	0	0
71052919	A	G	G	G	G	G	G	1	1	1	1	1	1	20	8	6	35	13	32	0	0	1	1	0	0	0	0	0	0	0	0
18936428	A	G	G	G	G	G	G	1	1	1	1	1	1	9	5	3	12	2	2	0	0	0	1	1	0	0	0	0	0	0	0
1466953	T	G	G	G	G	G	G	1	1	1	1	1	1	9	5	3	4	4	3	0	1	0	0	0	0	0	0	0	1	0	0
6112151	T	C	C	C	C	C	C	1	1	1	1	1	1	3	6	15	27	16	44	0	0	0	0	0	1	0	1	0	0	0	0
1566633	T	C	C	C	C	C	C	1	1	1	1	1	1	8	2	4	12	2	3	0	0	1	0	0	0	0	1	0	0	0	0
35973538	T	A	A	A	A	A	A	1	1	1	1	1	1	5	7	11	10	3	2	0	0	0	0	1	0	0	0	0	0	1	0
32450833	N	T	T	T	T	T	T	1	1	1	1	1	1	35	41	224	20	28	20	0	1	0	0	0	0	0	0	0	0	1	0
43260130	T	C	C	C	C	C	C	1	1	1	1	1	1	4	6	2	6	2	4	0	0	1	0	0	0	1	0	0	0	0	0
31739788	A	G	G	G	G	G	G	1	1	1	1	1	1	26	8	3	6	8	6	0	0	1	0	0	0	0	0	1	0	0	0
22816827	G	A	A	A	A	A	A	1	1	1	1	1	1	6	3	2	3	4	3	0	0	0	1	0	0	0	0	1	0	0	0
109721673	T	C	C	C	C	C	C	1	1	1	1	1	1	8	4	2	2	4	2	0	0	0	1	0	0	0	0	0	1	0	0
61476373	C	T	T	T	T	T	T	1	1	1	1	1	1	7	3	5	9	4	5	0	0	0	0	0	1	1	0	0	0	0	0
29578553	A	G	G	G	G	G	G	1	1	1	1	1	1	8	7	3	5	6	11	0	0	0	1	0	0	0	0	0	0	0	1
6143402	A	G	G	G	G	G	G	1	1	1	1	1	1	2	6	6	11	14	8	0	0	0	0	1	0	0	0	0	0	0	1
72629181	T	G	G	G	G	G	G	1	1	1	1	1	1	2	3	3	6	5	2	1	0	0	0	0	0	0	0	0	0	0	1
14944414	T	G	G	G	G	G	G	1	1	1	1	1	1	4	5	2	2	2	4	0	0	1	0	0	0	0	0	0	0	0	1
61242838	T	C	C	C	C	C	C	1	1	1	1	1	1	5	2	5	6	10	2	0	0	0	0	0	1	0	0	0	0	0	1
98881412	A	G	G	G	G	G	G	1	1	1	1	1	1	4	3	4	3	3	2	0	1	0	0	0	0	0	0	0	0	0	1
74083119	C	T	T	T	T	T	T	1	1	1	1	1	1	7	4	3	4	2	3	0	0	0	0	0	0	0	0	1	0	1	0
6013473	A	G	G	G	G	G	G	1	1	1	1	1	1	2	4	2	9	2	4	0	0	0	0	0	0	0	1	0	1	0	0
8486940	A	T	T	T	T	T	T	1	1	1	1	1	1	7	7	4	8	4	4	0	0	0	0	0	0	1	0	1	0	0	0
89551080	A	G	G	G	G	G	G	1	1	1	1	1	1	3	2	3	8	2	2	0	0	0	0	0	0	1	0	0	1	0	0
73823306	A	G	G	G	G	G	G	1	1	1	1	1	1	4	4	4	5	7	4	0	0	0	0	0	0	0	1	0	0	0	1
6144530	T	G	G	G	G	G	G	1	1	1	1	1	1	3	2	7	11	2	12	0	0	0	0	0	0	0	0	1	0	0	1
929237	C	G	G	G	G	G	G	1	1	1	1	1	1	4	2	1	5	2	6	0	0	0	0	0	0	0	0	1	0	0	1
29137964	G	C	C	C	C	C	C	1	1	1	1	1	1	2	6	5	2	6	4	0	0	0	0	0	0	0	0	0	0	1	1
93791112	T	C	C	C	C	C	C	1	1	1	1	1	1	6	8	3	3	2	6	0	0	0	0	0	0	1	0	0	0	0	1
7214251	C	T	T	T	T	T	T	1	1	1	1	1	1	4	6	7	9	3	2	0	0	0	0	0	0	0	0	0	0	1	1
111200973	A	C	C	C	C	C	C	1	1	1	1	1	1	4	11	7	4	4	6	0	0	0	0	0	0	0	0	0	1	0	1
13211941	T	C	C	C	C	C	C	1	1	1	1	1	1	5	4	5	12	11	3	0	0	0	0	0	0	1	0	0	0	0	1
24794001	A	G	G	G	G	G	G	1	1	1	1	1	1	26	19	16	12	18	30	0	0.416667	0.238095	0	0.833333	0.533333	0	0	0	0	0	0
71459090	T	C	C	C	C	C	C	1	1	1	1	1	1	42	32	6	16	3	10	0.555556	0	1	0.25	0.25	0	0	0	0	0	0	0
73930571	A	G	G	G	G	G	G	1	1	1	1	1	1	2	3	3	8	3	11	0	0	0	0.6	1	0	0	0	0	0	0	0.5
68468315	T	G	G	G	G	G	G	1	1	1	1	1	1	17	10	3	7	6	3	0	0	0.714286	0	0	0	0.8	0.333333	0.333333	0	0	0
4805233	G	A	A	A	A	A	A	1	1	1	1	1	1	4	12	3	6	4	11	0.666667	0	0	0	1	0	0.571429	0	0	0	0	0
63613649	A	G	G	G	G	G	G	1	1	1	1	1	1	2	5	3	10	1	8	1	0	1	0.285714	0	0	0	0	0	0	0	0
36870846	G	C	C	C	C	C	C	1	1	1	1	1	1	2	2	2	6	2	2	0	1	0	0	0	0	0.285714	0	0	0	0	1
114419317	A	G	G	G	G	G	G	1	1	1	1	1	1	22	15	9	6	2	3	0	0	0.666667	0	0	0	0.625	1	0	0	0	0
27079243	A	G	G	G	G	G	G	1	1	1	1	1	1	6	2	2	11	4	3	0	0	0	0	1	0	0	0	0	0	1	0.304348
48027913	C	T	T	T	T	T	T	1	1	1	1	1	1	9	13	2	2	11	6	0	0	0	1	0	0	0	0	0	0	1	0.4
68468317	C	G	G	G	G	G	G	1	1	1	1	1	1	18	10	3	8	6	3	0	0	0.833333	0	0	0	0.8	0.333333	0.5	0	0	0
5845815	T	C	C	C	C	C	C	1	1	1	1	1	1	2	3	4	9	8	19	0	1	0.25	0.5	0.75	0	0	0	0	0	0	0
18936431	G	A	A	A	A	A	A	1	1	1	1	1	1	9	6	4	10	2	2	0	0.5	0	1	1	0	0	0	0	0	0	0
34785197	A	G	G	G	G	G	G	1	1	1	1	1	1	6	2	4	3	2	7	0	0	1	1	0	0	0	0	0	0	0	0.5
6077824	A	G	G	G	G	G	G	1	1	1	1	1	1	24	2	12	13	3	20	0	0	0	0	1	0	0.833333	0	0	0	0.666667	0
76669301	T	C	C	C	C	C	C	1	1	1	1	1	1	27	6	5	16	17	14	0	0	0	0.4	0	0	0.4	0	0	0.7	0	1
89331522	A	G	G	G	G	G	G	1	1	1	1	1	1	10	2	6	3	2	5	0	0	0	0	0	0	1	0.75	0	0	0	0.8
114616915	G	T	T	T	T	T	T	1	1	1	1	1	1	5	2	5	6	8	2	0.6	0	0	0	0	0	0	0	0	1	0	1
10503517	C	T	T	T	T	T	T	1	1	1	1	1	1	2	2	7	4	2	3	0	0	0	0	1	0	1	0	0	0.6	0	0
32398545	G	A	A	A	A	A	A	1	1	1	1	1	1	11	12	11	9	6	11	0	1	0	0	0	0	0	1	0.6	0	0	0
48870573	T	C	C	C	C	C	C	1	1	1	1	1	1	10	9	4	8	5	3	1	0	0	0.625	0	1	0	0	0	0	0	0
45908049	T	C	C	C	C	C	C	1	1	1	1	1	1	4	4	3	6	2	3	0	0	0	0	0	1	0.75	0	0	0	0	0.909091
30103930	A	G	G	G	G	G	G	1	1	1	1	1	1	14	4	5	11	5	14	0	0	0	0	0.363636	0	0	0.285714	1	0.571429	0	0.5
45521042	T	C	C	C	C	C	C	1	1	1	1	1	1	5	9	5	10	6	8	0.5	0	0.875	0.666667	0	0	0.681818	0	0	0	0	0
45908022	G	T	T	T	T	T	T	1	1	1	1	1	1	5	7	7	15	2	3	0	0	0	0	0	1	0.75	0	0	0	0	1
134225633	T	C	C	C	C	C	C	1	1	1	1	1	1	7	4	6	13	12	5	0	1	0	0	0.8	0	0	0	1	0	0	0
62293371	G	A	A	A	A	A	A	1	1	1	1	1	1	3	6	4	8	8	26	1	0	0	0	0	0	0	0	0	0.8	1	0
55906608	G	T	T	T	T	T	T	1	1	1	1	1	1	2	11	4	6	6	3	0	0	0	1	1	0.8	0	0	0	0	0	0
48532513	T	A	A	A	A	A	A	1	1	1	1	1	1	7	9	3	5	2	7	0	0	0	0.444444	0	0	0.375	0	0	0	1	1
174972	A	G	G	G	G	G	G	1	1	1	1	1	1	4	2	2	4	2	3	0	0	1	0	0	0	0	0.333333	0.5	0	1	0
77543235	A	G	G	G	G	G	G	1	1	1	1	1	1	4	10	6	12	4	49	0	0	0.5	0	1	0	0.6	0	0	0	0.363636	0.434783
4235307	T	C	C	C	C	C	C	1	1	1	1	1	1	14	5	2	10	9	4	0	1	1	0	1	0	0	0	0	0	0	0
69000307	A	G	G	G	G	G	G	1	1	1	1	1	1	3	4	4	2	4	4	1	0	1	0	0	1	0	0	0	0	0	0
69000322	G	A	A	A	A	A	A	1	1	1	1	1	1	4	4	4	2	4	4	1	0	1	0	0	1	0	0	0	0	0	0
69000331	T	A	A	A	A	A	A	1	1	1	1	1	1	4	4	4	2	4	4	1	0	1	0	0	1	0	0	0	0	0	0
64650203	A	G	G	G	G	G	G	1	1	1	1	1	1	5	9	6	6	2	10	0	0	1	1	0	1	0	0	0	0	0	0
37259722	T	C	C	C	C	C	C	1	1	1	1	1	1	6	10	8	5	9	3	0	1	1	0	0	1	0	0	0	0	0	0
15241531	G	A	A	A	A	A	A	1	1	1	1	1	1	14	8	2	12	3	10	0	0.666667	0.5	0.833333	0	1	0	0	0	0	0	0
5753607	A	G	G	G	G	G	G	1	1	1	1	1	1	2	4	7	3	7	5	0	0	1	1	1	0	0	0	0	0	0	0
8956870	C	T	T	T	T	T	T	1	1	1	1	1	1	2	2	4	5	4	2	1	0	1	1	0	0	0	0	0	0	0	0
16978157	T	C	C	C	C	C	C	1	1	1	1	1	1	6	3	7	3	3	4	0	0	1	1	1	0	0	0	0	0	0	0
7926333	N	T	T	T	T	T	T	1	1	1	1	1	1	64	94	35	79	47	29	0	1	0	0	1	0	0	1	0	0	0	0
107308834	A	G	G	G	G	G	G	1	1	1	1	1	1	5	10	6	6	4	3	1	0	0	0	1	0	0	0	0	0	1	0
9835297	T	A	A	A	A	A	A	1	1	1	1	1	1	2	2	10	9	2	2	0	1	0	0	0	1	0	1	0	0	0	0
46852179	T	C	C	C	C	C	C	1	1	1	1	1	1	4	12	5	19	2	2	0	0	0	1	1	0	0	0	0	1	0	0
50845703	T	C	C	C	C	C	C	1	1	1	1	1	1	9	11	25	32	12	4	0	0	1	1	0	0	0	0	1	0	0	0
5570948	A	G	G	G	G	G	G	1	1	1	1	1	1	6	4	4	5	1	2	0	0	0	1	1	0	0	0	0	0	1	0
5570949	T	C	C	C	C	C	C	1	1	1	1	1	1	6	6	12	9	4	8	0	0	0	1	1	0	0	0	0	0	1	0
13888465	C	T	T	T	T	T	T	1	1	1	1	1	1	9	8	2	3	2	4	0	1	0	1	0	0	0	1	0	0	0	0
29922669	T	G	G	A	A	G	G	1	1	1	1	1	1	4	3	3	3	9	4	1	0	0	1	0	0	0	0	0	0	1	0
38955692	T	C	C	C	C	C	C	1	1	1	1	1	1	3	8	2	4	4	7	0	1	0	0	0	1	0	0	0	0	1	0
8447450	T	C	C	C	C	C	C	1	1	1	1	1	1	6	9	4	5	4	7	0	0	1	1	0	0	0	0	0	1	0	0
110341099	T	C	C	C	C	C	C	1	1	1	1	1	1	7	2	1	4	2	4	0	0	1	1	0	0	0	0	0	0	1	0
63446561	T	C	C	C	C	C	C	1	1	1	1	1	1	20	47	22	79	98	80	0	1	0	0	1	0	0	1	0	0	0	0
100476083	N	T	T	T	T	T	T	1	1	1	1	1	1	16	17	6	26	16	9	0	0	1	1	0	0	0	0	1	0	0	0
57238092	G	T	T	T	T	T	T	1	1	1	1	1	1	3	2	8	13	4	7	0	0	1	0	1	0	0	0	0	0	0	1
14509827	A	G	G	G	G	G	G	1	1	1	1	1	1	5	3	4	18	4	19	0	1	0	1	0	0	0	0	0	0	0	1
36547522	C	T	T	T	T	T	T	1	1	1	1	1	1	19	10	2	27	13	3	0	0	1	0	1	0	0	0	0	0	0	1
116661014	A	G	G	G	G	G	G	1	1	1	1	1	1	11	4	2	3	2	16	1	1	0	0	0	0	0	0	0	0	0	1
80927941	T	C	C	C	C	C	C	1	1	1	1	1	1	3	5	2	4	5	10	0	1	0	0	1	0	0	0	0	0	0	1
62288696	T	A	A	A	A	A	A	1	1	1	1	1	1	2	4	2	2	2	2	0	0	1	0	0	0	0	1	0	0	1	0
69574233	C	G	G	G	G	G	G	1	1	1	1	1	1	23	47	6	68	43	24	1	0	0	0	0	0	0	1	0	1	0	0
62341180	A	G	G	G	G	G	G	1	1	1	1	1	1	3	4	5	7	3	4	0	0	0	0	0	1	0	1	0	1	0	0
9916573	A	G	G	G	G	G	G	1	1	1	1	1	1	5	3	2	12	2	10	0	0	0	0	0	1	0	0	1	1	0	0
69423862	G	A	A	A	A	A	A	1	1	1	1	1	1	6	11	5	3	2	10	0	0	0	1	0	0	1	1	0	0	0	0
15261571	T	A	A	A	A	A	A	1	1	1	1	1	1	2	8	4	4	2	2	1	0	0	0	0	0	0	1	1	0	0	0
49751814	C	T	T	T	T	T	T	1	1	1	1	1	1	15	5	7	8	2	3	0	0	0	1	0	0	0	0	1	0	1	0
77313127	C	G	G	G	G	G	G	1	1	1	1	1	1	3	2	2	3	2	9	0	0	0	0	0	1	0	0	1	0	1	0
81753309	T	G	G	G	G	G	G	1	1	1	1	1	1	3	5	4	5	2	3	0	0	0	0	1	0	0	0	1	0	1	0
61476317	A	T	T	T	T	T	T	1	1	1	1	1	1	5	3	2	2	6	4	0	0	0	0	0	1	1	0	0	0	1	0
76121801	T	C	C	C	C	C	C	1	1	1	1	1	1	8	2	4	3	13	16	0	0	0	1	0	0	1	0	0	0	1	0
105380513	C	T	T	T	T	T	T	1	1	1	1	1	1	11	8	2	11	10	29	0	0	0	0	0	1	1	0	0	1	0	0
102699401	N	A	A	A	A	A	A	1	1	1	1	1	1	14	3	4	6	2	10	0	1	0	0	0	0	0	0	0	0	1	1
33423542	T	C	C	C	C	C	C	1	1	1	1	1	1	2	5	9	4	3	3	0	0	1	0	0	0	1	0	0	0	0	1
44968577	G	A	A	A	A	A	A	1	1	1	1	1	1	4	6	2	3	2	5	0	0	0	0	0	1	1	0	0	0	0	1
43186900	A	G	G	G	G	G	G	1	1	1	1	1	1	16	3	2	26	15	8	0	0	1	0	0	0	0	0	0	0	1	1
14944416	C	G	G	G	G	G	G	1	1	1	1	1	1	4	7	2	2	2	9	0	0	1	0	0	0	0	0	0	1	0	1
46045468	C	T	T	T	T	T	T	1	1	1	1	1	1	4	2	3	4	4	6	0	0	0	0	1	0	0	0	1	0	0	1
31228817	T	A	A	A	A	A	A	1	1	1	1	1	1	3	4	5	12	2	3	1	0	0	0	0	0	0	0	0	0	1	1
19792114	G	A	A	A	A	A	A	1	1	1	1	1	1	6	4	4	2	4	3	0	0	1	0	0	0	0	0	0	0	1	1
48923294	T	C	C	C	C	C	C	1	1	1	1	1	1	21	9	16	22	8	36	0	1	0	0	1	1	0	0	0	0	0	0
12712511	C	G	G	G	G	G	G	1	1	1	1	1	1	4	5	8	16	9	15	0	0	0	0	0	0	1	0	0	1	1	0
43250033	A	G	G	G	G	G	G	1	1	1	1	1	1	2	2	3	2	4	5	0	0	0	0	0	0	0	0	0	1	1	1
48816533	G	C	C	C	C	C	C	1	1	1	1	1	1	7	9	2	1	3	5	0	0	0	0	0	0	0	1	0	0	1	1
71462379	G	A	A	A	A	A	A	1	1	1	1	1	1	9	7	2	8	2	4	0	0	1	0	0	0.5	1	0	0	0.307692	0.259259	0
40966791	A	C	C	C	C	C	C	1	1	1	1	1	1	30	5	8	34	11	6	0	0.75	0.75	0.588235	1	0	0	0	0	0	0	0
89861606	C	A	A	A	A	A	A	1	1	1	1	1	1	4	3	3	6	7	17	1	0	0	0	1	0.666667	0	0	0	0	0	0.444444
8938209	A	G	G	G	G	G	G	1	1	1	1	1	1	6	15	7	18	2	18	0	0	0	0.285714	0	1	1	0.333333	0	0	0	0.5
19862626	C	A	A	A	A	A	A	1	1	1	1	1	1	4	11	2	7	7	3	0	0	0	0.666667	1	0	0.5	0	0	0	1	0
28127847	C	T	T	T	T	G	T	1	1	1	1	1	1	11	4	10	16	2	3	0	0	1	0	0	0	0.666667	1	0	0	0	0.5
25757605	G	A	A	A	A	A	A	1	1	1	1	1	1	4	2	2	8	2	4	0	0	0	0	0	0	0	1	0	1	1	0.25
83598500	A	G	G	G	G	G	G	1	1	1	1	1	1	7	6	2	5	6	10	1	1	0	0	0.333333	0	0	0	0	1	0	0
62341152	T	C	C	C	C	C	C	1	1	1	1	1	1	2	4	8	18	2	4	0	0	0	0	0	1	0	1	0	0	0.666667	0.666667
27223315	A	C	C	C	C	C	C	1	1	1	1	1	1	6	7	5	13	4	7	0.357143	0	1	0	0	0	0	1	0	1	0	0
69276457	A	G	G	G	G	G	G	1	1	1	1	1	1	3	7	4	7	3	5	0.666667	0	0.5	0.5	0	0	0.6	0	0	0	0.666667	0.428571
61242665	C	T	T	T	T	T	T	1	1	1	1	1	1	5	2	8	6	7	11	0	0	0.375	1	0	1	0	0	0	0	0	1
37989408	C	G	G	G	G	G	G	1	1	1	1	1	1	165	167	110	248	124	134	0	0.428571	0.984496	0	0.54386	0	1	0	0	0	0	0.431579
10094845	A	G	G	G	G	G	G	1	1	1	1	1	1	5	3	7	7	3	4	1	1	0	0	1	0	0	0	0	0.4	0	0
67798094	G	A	A	A	A	A	A	1	1	1	1	1	1	8	9	7	11	4	7	0	0	0.428571	1	0	1	0	0	0	0	0	1
23520988	A	C	C	C	C	C	C	1	1	1	1	1	1	7	11	2	5	5	11	0	0	0.4	0	0	0	1	0.333333	0.5	0.222222	1	0
67364847	T	C	C	C	C	C	C	1	1	1	1	1	1	33	31	33	22	19	13	0.444444	1	0.414634	0.431818	0	0	0	0.516129	0.692308	0	0	0
6942116	G	A	A	A	A	A	A	1	1	1	1	1	1	4	4	4	2	3	2	0	1	1	0	1	0	0	0.5	0	0	0	0
5862413	C	T	T	T	T	T	T	1	1	1	1	1	1	4	3	26	52	11	71	0	1	0.5	0.526316	0.470588	0.37931	0	0.625	0	0	0	0
82342597	A	G	G	G	G	G	G	1	1	1	1	1	1	27	15	18	22	17	16	0	1	0	0.833333	0.5	0	0.230769	0	0	0.454545	0	0.5
5862429	A	G	G	G	G	G	G	1	1	1	1	1	1	4	3	26	53	10	56	0	1	0.5	0.473684	0.484848	0.407407	0	0.666667	0	0	0	0
51193911	C	A	A	A	A	A	A	1	1	1	1	1	1	5	6	2	6	6	7	0	0	0.666667	0	0	1	0.5	0	0	1	0.375	0
26508597	G	C	C	C	C	C	C	1	1	1	1	1	1	7	4	5	48	11	5	0	0	1	1	0.571429	1	0	0	0	0	0	0
77904972	G	A	A	A	A	A	A	1	1	1	1	1	1	21	16	3	10	14	3	0	0.333333	1	1	0	0	0.4	0.428571	0	0	0	0.411765
105380395	T	C	C	C	C	C	C	1	1	1	1	1	1	11	7	9	21	12	14	0	0	0	0	0	0.6	1	0	0	1	0	1
26508496	T	C	C	C	C	C	C	1	1	1	1	1	1	7	4	4	46	9	4	0	0	1	1	0.6	1	0	0	0	0	0	0
83285679	A	G	G	G	G	G	G	1	1	1	1	1	1	14	8	2	5	2	26	0.7	0	0	0.444444	0	0	0	0.875	0.428571	0	1	0.153846
76528815	T	C	C	C	C	C	C	1	1	1	1	1	1	4	4	3	8	2	3	0	0	0.8	1	0	0	0	0	1	0	0	0.833333
28123360	A	G	G	G	G	G	G	1	1	1	1	1	1	9	6	5	3	3	4	0	0	1	0	0	0	0.857143	0.8	0	0	1	0
46932522	T	C	C	C	C	C	C	1	1	1	1	1	1	3	11	4	6	2	9	0	0	0	0.875	0	0.666667	0.833333	0	1	0	0.285714	0
13877804	G	C	C	C	C	C	C	1	1	1	1	1	1	10	4	3	5	2	4	0	1	1	1	0	0	0	0	0	0	0.666667	0
67798027	G	A	A	A	A	A	A	1	1	1	1	1	1	3	10	5	5	3	8	0	0	0.666667	1	0	1	0	0	1	0	0	0
7696330	C	T	T	T	T	T	T	1	1	1	1	1	1	3	3	5	11	2	5	0.666667	0	1	1	0	0	0	1	0	0	0	0
19477827	G	T	T	T	T	T	T	1	1	1	1	1	1	5	11	2	14	2	20	1	0	0	1	0	0.666667	0	0	1	0	0	0
174931	T	C	C	C	C	C	C	1	1	1	1	1	1	4	2	2	4	2	3	0	0	1	1	0	0	0	0.666667	0	0	1	0
62341158	G	A	A	A	A	A	A	1	1	1	1	1	1	2	4	8	15	2	4	0	0	0	0	0	1	0	1	0	0	1	0.666667
26508550	C	A	A	A	A	A	A	1	1	1	1	1	1	8	4	5	51	11	6	0	0	1	1	0.666667	1	0	0	0	0	0	0
5848558	T	C	C	C	C	C	C	1	1	1	1	1	1	2	6	10	14	3	68	0	0	0	1	1	1	0	0	0	0	0	0.666667
37802196	T	C	C	C	C	C	C	1	1	1	1	1	1	13	15	3	17	8	1	0	0	1	1	0	1	0	0	0	0	0.714286	0
119432750	G	C	C	C	C	C	C	1	1	1	1	1	1	4	2	4	4	7	11	0	1	1	0	0	0	0	0	0	1	0	0.714286
26660834	A	G	G	G	G	G	G	1	1	1	1	1	1	6	5	4	3	9	15	1	0	0.333333	0.5	0	0	1	0	0	0.375	0.518519	0
72189866	T	C	C	C	C	C	C	1	1	1	1	1	1	5	3	3	11	11	7	1	0	0	0	0	1	0	0	0	0.75	0	1
57409333	A	G	G	G	G	G	G	1	1	1	1	1	1	2	6	3	11	5	3	0	0	0	1	0	1	0	0	0	1	0	0.75
73415326	A	G	G	G	G	G	G	1	1	1	1	1	1	17	7	2	5	9	2	0	1	0	0	0	0	0	1	0	0.75	1	0
40856459	T	C	C	C	C	C	C	1	1	1	1	1	1	2	6	17	18	10	24	0.857143	0	0	0	0	0	0.3	1	0.631579	0	0	1
933462	T	C	C	C	C	C	C	1	1	1	1	1	1	2	2	9	13	6	7	0	0	0	0	1	0.333333	0	0.857143	0	0	0.6	1
82886725	C	T	T	T	T	T	T	1	1	1	1	1	1	10	7	8	9	2	4	1	0	1	0.8	1	0	0	0	0	0	0	0
98100333	A	G	G	G	G	G	G	1	1	1	1	1	1	2	4	13	40	6	7	1	0	1	0.8	0	0	1	0	0	0	0	0
6087763	G	A	A	A	A	A	A	1	1	1	1	1	1	13	12	3	8	4	9	0	0	0	0	0	0	0	1	0	1	0.8	1
11272558	G	A	A	A	A	A	A	1	1	1	1	1	1	7	7	2	12	11	33	0	0	1	0.586207	0	0.461538	0.428571	0.333333	0	1	0	0
10813221	T	A	A	A	A	A	A	1	1	1	1	1	1	3	3	3	9	2	4	1	0	0	1	0	0	0	0	1	0	0	0.857143
30103960	G	A	A	A	A	A	A	1	1	1	1	1	1	19	4	8	12	5	11	0	0	0	0	0.416667	0	0	0.333333	1	0.555556	1	0.5625
16249125	A	G	G	G	G	G	G	1	1	1	1	1	1	4	6	2	18	7	8	0	0	0.75	1	0.75	0	0.375	0	0	0	0	1
98100521	G	T	T	T	T	T	T	1	1	1	1	1	1	2	3	61	72	9	6	0.892857	0	1	1	1	0	0	0	0	0	0	0
40848125	C	T	T	T	T	T	T	1	1	1	1	1	1	4	10	10	19	11	7	0	0	0	0	0.5	1	0	1	0.166667	0	0.230769	1
5853414	A	C	C	C	C	C	C	1	1	1	1	1	1	9	4	24	51	16	31	0	1	0.388889	0.636364	0.5	1	0	0.387097	0	0	0	0
62346792	T	C	C	C	C	C	C	1	1	1	1	1	1	8	4	8	6	4	5	0	0	1	0	1	0	0.416667	1	0	0	0	0.5
46930510	G	A	A	A	A	A	A	1	1	1	1	1	1	13	8	8	4	2	8	0	0	0	1	0	0.5	0.75	0	0	1	0.666667	0
5134915	T	C	C	C	C	C	C	1	1	1	1	1	1	23	18	2	13	10	8	0	0	0.5	0	1	0	0	0	1	1	0	0.428571
48870063	G	A	A	A	A	A	A	1	1	1	1	1	1	25	17	22	22	11	11	1	0	0	0.285714	1	1	0	0	0.666667	0	0	0
9833688	G	C	C	C	C	C	C	1	1	1	1	1	1	7	16	7	18	8	17	0	0.958333	1	0	0	1	0	1	0	0	0	0
73999234	T	C	C	C	C	C	C	1	1	1	1	1	1	15	2	3	8	4	9	0	1	1	1	0	0	0	0	0	0.818182	0	0.166667
59321213	T	C	C	C	C	C	C	1	1	1	1	1	1	91	94	7	4	10	2	0	0	1	1	0.352941	0	1	0	0	0.294118	0	0.348214
20234595	A	G	G	G	G	G	G	1	1	1	1	1	1	13	3	5	21	10	5	0	1	1	1	0	1	0	0	0	0	0	0
58737727	A	C	C	C	C	C	C	1	1	1	1	1	1	13	2	2	5	5	4	1	1	0	1	0	1	0	0	0	0	0	0
1749470	C	A	A	A	A	A	A	1	1	1	1	1	1	10	6	4	3	2	5	1	1	1	1	0	0	0	0	0	0	0	0
95500758	G	A	A	A	A	A	A	1	1	1	1	1	1	23	2	8	13	9	16	0	1	1	1	0	1	0	0	0	0	0	0
22647654	C	A	A	A	A	A	A	1	1	1	1	1	1	11	7	2	22	2	7	0	1	1	1	0	1	0	0	0	0	0	0
89327120	G	A	A	A	A	A	A	1	1	1	1	1	1	11	9	10	12	3	16	0	1	1	1	0	1	0	0	0	0	0	0
26442171	T	C	C	C	C	C	C	1	1	1	1	1	1	6	5	2	4	2	3	0	0	1	1	1	0	1	0	0	0	0	0
42902969	A	T	T	T	T	T	T	1	1	1	1	1	1	1	1	2	8	2	3	0	1	0	1	0	1	0	0	0	0	1	0
99483515	A	G	G	G	G	G	G	1	1	1	1	1	1	6	2	11	25	16	21	0	1	0	1	0	1	0	0	0	1	0	0
50845652	A	G	G	G	G	G	G	1	1	1	1	1	1	10	4	14	17	16	2	0	0	1	1	1	0	0	0	1	0	0	0
8405911	C	A	A	A	A	A	A	1	1	1	1	1	1	6	2	2	4	6	2	1	0	1	0	0	1	0	0	0	0	1	0
58553170	T	C	C	C	C	C	C	1	1	1	1	1	1	5	3	3	7	3	10	1	0	1	1	0	0	0	0	0	0	1	0
38560527	T	C	C	C	C	C	C	1	1	1	1	1	1	34	95	85	133	137	330	0	1	1	1	0	0	0	1	0	0	0	0
98100323	G	A	A	A	A	A	A	1	1	1	1	1	1	2	4	16	41	5	7	1	0	1	1	0	0	1	0	0	0	0	0
43638542	G	A	A	A	A	A	A	1	1	1	1	1	1	17	3	2	11	3	7	0	1	1	0	0	1	0	0	0	0	0	1
28298676	T	C	C	C	C	C	C	1	1	1	1	1	1	4	2	6	3	5	6	1	0	1	1	0	0	0	0	0	0	0	1
47524061	N	G	G	G	G	G	G	1	1	1	1	1	1	10	4	5	15	2	8	1	0	0	1	1	0	0	0	0	0	0	1
60620106	G	T	T	T	T	T	T	1	1	1	1	1	1	48	39	42	44	20	11	0	0	1	1	0	1	0	0	0	0	0	1
89359940	C	G	G	G	G	G	G	1	1	1	1	1	1	2	2	5	13	3	4	0	1	0	0.5	1	0	0	0.625	0.875	0	0	0
21300665	A	T	T	T	T	T	T	1	1	1	1	1	1	6	3	3	2	3	6	0	0	1	0	0	1	1	0	0	1	0	0
8294183	C	T	T	T	T	T	T	1	1	1	1	1	1	9	4	8	10	7	5	0	0	1	1	0	0	1	0	0	1	0	0
15973958	C	T	T	T	T	T	T	1	1	1	1	1	1	20	7	26	27	12	42	1	0	1	0	0	0	1	0	0	1	0	0
52319800	A	G	G	G	G	G	G	1	1	1	1	1	1	6	2	4	6	4	2	0	0	1	1	0	0	1	0	0	1	0	0
66995699	C	T	T	T	T	T	T	1	1	1	1	1	1	7	6	5	14	5	43	0	1	0	1	0	0	0	1	0	0	1	0
99918825	C	T	T	T	T	T	T	1	1	1	1	1	1	5	6	7	11	6	4	1	0	0	0	1	0	0	1	1	0	0	0
112742713	A	G	G	G	G	G	G	1	1	1	1	1	1	5	6	3	2	15	5	0	0	1	0	1	0	1	0	0	0	1	0
29248101	T	C	C	C	C	C	C	1	1	1	1	1	1	2	10	9	9	2	10	0	0	1	1	0	0	1	0	0	0	0	1
32190775	A	C	C	C	C	C	C	1	1	1	1	1	1	5	7	7	5	13	9	0	0	1	1	0	0	0	0	0	0	1	1
46755516	A	T	T	T	T	T	T	1	1	1	1	1	1	4	7	5	15	10	8	0	1	1	0	0	0	0	0	1	0	0	1
10502584	A	C	C	C	C	C	C	1	1	1	1	1	1	7	3	7	7	5	2	0	0	0	1	0	1	0	0	1	0	0	1
31113553	T	C	C	C	C	C	C	1	1	1	1	1	1	3	5	6	11	3	3	0	0	1	1	0	0	0	0	1	0	0	1
52276860	A	C	C	C	C	C	C	1	1	1	1	1	1	10	6	8	19	3	2	0	0	1	0	1	0	0	1	0	0	0	1
53189280	C	G	G	G	G	G	G	1	1	1	1	1	1	2	2	9	3	2	3	1	0	0	1	0	0	0	1	0	0	0	1
61789424	T	C	C	C	C	C	C	1	1	1	1	1	1	5	2	8	7	3	5	0	0	1	0	0	1	1	0	0	0	0	1
32190775	A	C	C	C	C	C	C	1	1	1	1	1	1	5	7	7	5	13	9	0	0	1	1	0	0	0	0	0	0	1	1
81908310	T	C	C	C	C	C	C	1	1	1	1	1	1	2	4	3	9	2	6	0	0	0	1	1	0	1	0	0	0	0	1
51536084	C	G	G	G	G	G	G	1	1	1	1	1	1	2	3	2	2	2	2	0	0	1	0	0	1	0	1	0	0	0	1
60285128	A	G	G	G	G	G	G	1	1	1	1	1	1	6	4	6	3	3	2	0	0	1	0	1	0	0	0	1	0	0.5	0.5
15294629	T	C	C	C	C	C	C	1	1	1	1	1	1	2	3	6	5	2	4	0	1	1	0	0	0	0	0	0	1	0	1
60785172	A	T	T	T	T	T	T	1	1	1	1	1	1	9	16	9	10	2	6	0	1	0	0	1	0	0	0	0	0	1	1
130271349	C	T	T	T	T	T	T	1	1	1	1	1	1	3	8	3	11	4	2	0	0	1	1	0	0	0	0	0	1	0	1
39657066	T	C	C	C	C	C	C	1	1	1	1	1	1	9	8	8	4	7	3	0	0	0	1	0	0	1	0	0	1	1	0
39657071	A	G	G	G	G	G	G	1	1	1	1	1	1	9	8	10	7	7	3	0	0	0	1	0	0	1	0	0	1	1	0
84342589	C	T	T	T	T	T	T	1	1	1	1	1	1	8	2	2	3	5	3	0	0	0	0	0	1	0	1	1	1	0	0
105377326	G	A	A	A	A	A	A	1	1	1	1	1	1	6	5	21	23	7	17	0	0	0	0	0	1	1	0	0	1	1	0
105380580	G	A	A	A	A	A	A	1	1	1	1	1	1	10	8	4	10	11	24	0	0	0	0	0	1	1	0	0	1	1	0
1753378	G	C	C	C	C	C	C	1	1	1	1	1	1	11	3	14	7	14	9	0	0	0	0	1	0	1	0	0	1	0	1
36811035	T	A	A	A	A	A	A	1	1	1	1	1	1	2	6	2	7	7	7	0	0	0	0	0	1	0	1	0	1	0	1
69978416	G	T	T	T	T	T	T	1	1	1	1	1	1	3	5	2	4	2	9	0	0	1	0	0	0	0	0	0	1	1	1
6144550	C	T	T	T	T	T	T	1	1	1	1	1	1	10	2	8	11	2	13	0	0	1	0	0	0	1	0	1	0	0	1
6163907	A	G	G	G	G	G	G	1	1	1	1	1	1	4	5	24	25	4	16	0	0	0	0	0	1	1	0	0	1	0	1
6171288	C	T	T	T	T	T	T	1	1	1	1	1	1	3	6	15	29	4	23	0	0	0	0	1	0	0	1	0	0	1	1
14867497	A	G	G	G	G	G	G	1	1	1	1	1	1	4	2	2	5	5	2	0	0	0	1	0	0	0	0	1	1	0	1
36542384	T	C	C	C	C	C	C	1	1	1	1	1	1	2	4	3	7	2	6	0	0	0	1	0	0	0	0	1	1	0	1
29366419	T	C	C	C	C	C	C	1	1	1	1	1	1	10	5	2	4	2	16	0	0	0	1	0	0	1	0	0	0	1	1
28427642	C	A	A	A	A	A	A	1	1	1	1	1	1	2	3	5	4	2	9	0	0	0	0	0	1	1	0	0	0	1	1
19446483	G	T	T	T	T	T	T	1	1	1	1	1	1	4	5	3	2	4	8	0	1	0	0	0	0	0	1	0	1	0	1
21904940	C	T	T	T	T	T	T	1	1	1	1	1	1	5	77	18	73	55	2	1	0	0	0	0	0	1	0	1	0	0	1
9377986	A	G	G	G	G	G	G	1	1	1	1	1	1	2	7	2	3	4	4	0	0	1	0	0	0	0	1	0	0	1	1
91770555	T	C	C	C	C	C	C	1	1	1	1	1	1	12	2	3	9	3	3	0	0	0	0	0	1	0	0	1	1	0	1
64263820	A	G	G	G	G	G	G	1	1	1	1	1	1	6	6	7	18	3	2	0	1	0	1	1	1	0	0	0	0	0	0
54799314	A	G	G	G	G	G	G	1	1	1	1	1	1	4	5	2	12	3	2	0	0	1	1	1	1	0	0	0	0	0	0
35760364	G	A	A	A	A	A	A	1	1	1	1	1	1	8	3	9	3	3	2	0	0	0	0	0	0	0	1	1	1	1	0
119663431	C	T	T	T	T	T	T	1	1	1	1	1	1	2	2	3	5	3	2	0	0	0	0	1	1	0	1	0	0	1	0
119663438	C	T	T	T	T	T	T	1	1	1	1	1	1	2	2	5	5	3	2	0	0	0	0	1	1	0	1	0	0	1	0
126236175	C	A	A	A	A	A	A	1	1	1	1	1	1	11	5	2	8	3	18	0	0	0	0	0	0	0	1	1	1	1	0
60640268	A	G	G	G	G	G	G	1	1	1	1	1	1	4	8	5	4	4	5	0	1	0	0	1	1	0	0	0	0	0	1
44970171	C	T	T	T	T	T	T	1	1	1	1	1	1	3	6	10	14	2	1	0	0	0	0	1	1	1	0	0	0	0	1
55214605	T	C	C	C	C	C	C	1	1	1	1	1	1	10	2	2	7	6	10	0	0	0	0	1	1	0	0	0	0	1	1
28372859	G	A	A	A	A	A	A	1	1	1	1	1	1	5	4	5	2	2	2	0	0	0	0	0	0	1	0	1	1	0	1
107417188	G	A	A	A	A	A	A	1	1	1	1	1	1	4	16	9	15	3	3	0	0	1	0.666667	0	0	1	0.666667	0	0	0	0.666667
134301808	C	T	T	T	T	T	T	1	1	1	1	1	1	2	9	5	8	4	4	1	0	0.75	0	0	0	0	1	0.8	0	0	0.454545
5857997	T	C	C	C	C	C	C	1	1	1	1	1	1	11	13	18	31	4	29	0	1	0.466667	0.777778	0.536585	0.6875	0	0.541667	0	0	0	0
73480920	A	G	G	G	G	G	G	1	1	1	1	1	1	4	3	3	15	1	9	1	0	0	1	0	1	0.5	0	0	0.555556	0	0
67798546	C	T	T	T	T	T	T	1	1	1	1	1	1	10	4	6	16	3	2	0	0	0	1	0	0.555556	0	0	1	0.5	0	1
59321131	C	G	G	G	G	G	G	1	1	1	1	1	1	111	108	12	5	16	5	0	0	1	1	0.26087	0	1	0	0.1875	0.2	0	0.43299
54626315	G	C	C	C	C	C	C	1	1	1	1	1	1	15	4	4	21	6	10	0	1	0	1	0	0	0.5	0.6	0	0	0	1
102123997	T	C	C	C	C	C	C	1	1	1	1	1	1	5	3	5	7	2	5	0.333333	1	0.444444	0.5	0	1	0	0	0.823529	0	0	0
71463046	T	C	C	C	C	C	C	1	1	1	1	1	1	20	17	6	7	6	4	0	0.25	1	0.2	0	0.5	1	0	0	0.666667	0.488889	0
71460489	A	G	G	G	G	G	G	1	1	1	1	1	1	17	9	10	18	6	13	0	0.25	0.941176	0.478261	0	0.583333	1	0	0	0.571429	0.302326	0
64695109	G	C	C	C	C	C	C	1	1	1	1	1	1	12	7	4	8	10	4	0.454545	1	0.363636	1	0	0	0	0.47619	0	0.5	0	0.333333
23661188	C	T	T	T	T	T	T	1	1	1	1	1	1	12	6	6	12	5	3	1	0	0	0	1	1	0.666667	0	0	0.47619	0	0
31738259	C	T	T	T	T	T	T	1	1	1	1	1	1	27	24	26	32	26	20	1	0	0.727273	0	0.416667	0.428571	0.5	0	0.6875	0	0	0.384615
6042774	G	C	C	C	C	C	C	1	1	1	1	1	1	16	17	9	27	16	40	0	1	0.545455	0.454545	0.47619	0.9	0	0.777778	0	0	0	0
78647143	T	G	G	G	G	G	G	1	1	1	1	1	1	25	23	25	46	27	54	0	0	0	0.457143	0	0	0	1	0.7	1	1	0
28271070	A	G	G	G	G	G	G	1	1	1	1	1	1	10	3	5	5	12	11	0	1	0.545455	0	0	0	0	1	0	0.636364	1	0
66880117	T	C	C	C	C	C	C	1	1	1	1	1	1	13	4	7	5	4	4	0	0	1	1	0	1	0	0	0	0	0.1875	1
67795803	C	T	T	T	T	T	T	1	1	1	1	1	1	4	4	2	11	9	15	0	0	0.538462	1	0	0	0	0	1	0.666667	0	1
99918730	T	C	C	C	C	C	C	1	1	1	1	1	1	5	6	7	7	14	13	1	0	0.5	0	1	0	0	1	0.733333	0	0	0
78647198	C	G	G	G	G	G	G	1	1	1	1	1	1	39	31	34	55	24	53	0	0	0	0.464286	0	0	0	1	0.777778	1	1	0
29922943	A	T	T	T	T	T	T	1	1	1	1	1	1	5	4	6	2	2	12	0	0	0.666667	0	1	0	0	1	0	0.6	1	0
75680826	C	T	T	T	T	T	T	1	1	1	1	1	1	10	15	2	12	5	16	0	1	0.4	0.421053	0.375	0	0	0	0.2	0.571429	1	0.3
845495	T	C	C	C	C	C	C	1	1	1	1	1	1	41	32	21	48	48	28	0.8125	0.571429	0	0.225806	1	1	0.380952	0	0	0	0	0.28125
5134299	A	G	G	G	G	G	G	1	1	1	1	1	1	6	9	5	8	4	15	0	0	0.5	0	1	0	1	0	0.8	1	0	0
10099682	T	C	C	C	C	C	C	1	1	1	1	1	1	9	19	36	34	16	37	0	0.666667	0.636364	1	1	1	0	0	0	0	0	0
36160927	A	G	G	G	G	G	G	1	1	1	1	1	1	2	6	6	7	9	10	0	0.75	0	1	0	1	0	0.6	0	0	0	1
76930715	G	A	A	A	A	A	A	1	1	1	1	1	1	8	12	2	4	7	8	0	1	0.4	1	0	0	1	0	0	0	0	1
39199048	G	A	A	A	A	A	A	1	1	1	1	1	1	24	32	47	49	15	19	0	0	1	0	0	1	0.4	0	1	1	0	0
44167605	G	A	A	A	A	A	A	1	1	1	1	1	1	2	2	4	12	3	7	1	0	0	1	0	0	0	0.4	1	0	0	1
71417606	C	A	A	A	A	A	A	1	1	1	1	1	1	25	25	21	34	31	39	0	0.5	0.357143	0.121951	0.857143	0	1	0	0	0.571429	0	1
71417646	A	G	G	G	G	G	G	1	1	1	1	1	1	27	33	32	55	41	51	0	0.5	0.517241	0	0.75	0	1	0	0	0.47619	0.166667	1
48921824	T	C	C	C	C	C	C	1	1	1	1	1	1	20	28	9	32	16	45	0	1	0	0.411765	1	1	0	0	1	0	0	0
27600996	A	G	G	G	G	G	G	1	1	1	1	1	1	3	8	13	19	4	2	0	0	0	0.75	0	0	1	0	0	0.666667	1	1
84974355	C	T	T	T	T	T	T	1	1	1	1	1	1	5	7	6	10	7	9	0	0.5	0.8	0.368421	0.8	0.6	0	0.166667	1	0.181818	0	0
22260974	C	T	T	T	T	T	T	1	1	1	1	1	1	2	2	2	2	4	4	0	0	0	0	1	0	1	1	0	0.428571	0	1
6042688	T	C	C	C	C	C	C	1	1	1	1	1	1	8	13	12	30	15	68	0	1	0.6	0.444444	0.666667	1	0	0.727273	0	0	0	0
75680810	C	G	G	G	G	G	G	1	1	1	1	1	1	14	9	5	14	5	17	0	1	0.4	0.478261	0.428571	0	0	0	0.285714	0.571429	1	0.285714
67799022	A	G	G	G	G	G	G	1	1	1	1	1	1	3	10	4	7	16	2	0	0	0.8	1	0	0	0	0	0	1	0.666667	1
56342011	A	G	G	G	G	G	G	1	1	1	1	1	1	14	2	9	2	4	2	0	0	1	1	0	1	0	1	0	0.5	0	0
22260939	G	A	A	A	A	A	A	1	1	1	1	1	1	2	2	2	2	4	4	0	0	0	1	1	0	1	0	0	0.5	0	1
57102213	G	A	A	A	A	A	A	1	1	1	1	1	1	19	11	10	13	15	3	0	0	0.5	0	0	1	1	1	0	0	1	0
67798211	T	C	C	C	C	C	C	1	1	1	1	1	1	7	3	6	13	4	9	0	0	0.5	1	0	0	1	0	0	1	0	1
6130229	C	T	G	T	T	T	T	1	1	1	1	1	1	8	2	6	9	4	31	0	1	0	0	0	0	0	0.5	0	1	1	1
75680825	C	A	A	A	A	A	A	1	1	1	1	1	1	10	15	2	11	5	15	0	1	0.5	0.421053	0.375	0	0	0	0.333333	0.571429	1	0.315789
89832236	C	T	T	T	T	T	T	1	1	1	1	1	1	2	4	2	3	2	3	0	1	0	0.6	0	1	0	0.5	0	0.75	0	0.666667
60612973	C	T	T	T	T	T	T	1	1	1	1	1	1	101	71	41	53	44	52	0.488372	0.222222	1	0.9	0.916667	0	0	0	0	0	0	1
22391171	G	C	C	C	C	C	C	1	1	1	1	1	1	126	84	62	79	37	97	0.457627	0.45283	1	0.622642	1	1	0	0	0	0	0	0
6168808	T	C	C	C	C	C	C	1	1	1	1	1	1	7	13	7	5	5	27	0	0	0	0	0	1	1	0	0	1	0.578947	1
106670045	T	C	C	C	C	C	C	1	1	1	1	1	1	4	3	3	3	3	2	0	0	0	0	0	0	0.6	1	0	1	1	1
40049666	T	C	C	C	C	C	C	1	1	1	1	1	1	12	2	2	7	2	8	0	1	0	1	0	1	0	0	0	0.5	0.5	0.6
49265663	G	A	A	A	A	A	A	1	1	1	1	1	1	8	13	12	31	15	5	1	0	0	0.6	1	0.5	0	0	1	0	0.5	0
28786953	G	C	C	C	C	C	C	1	1	1	1	1	1	19	25	11	17	5	11	0.454545	0	0	0.352941	0.916667	1	0.222222	0	0	0.6	0.555556	0.5
27931200	T	C	C	C	C	C	C	1	1	1	1	1	1	7	5	3	6	10	2	0	1	0.714286	0	0.666667	0	1	0	0	0.666667	0	0.571429
7895208	G	A	A	A	A	A	A	1	1	1	1	1	1	24	13	24	21	11	16	1	1	0.3	0.461538	1	0.5	0	0	0	0.363636	0	0
846528	A	C	C	C	C	C	C	1	1	1	1	1	1	103	110	35	59	79	45	0.52809	0.526316	0	0.424242	1	1	0.631579	0	0	0	0	0.528846
60600321	G	A	A	A	A	A	A	1	1	1	1	1	1	90	22	12	9	38	23	0	0.142857	1	1	1	0.5	0	0	0	0	0	1
72928959	G	A	A	A	A	A	A	1	1	1	1	1	1	15	27	23	39	15	8	0	1	1	0.666667	1	0	0	1	0	0	0	0
104307579	T	C	C	C	C	C	C	1	1	1	1	1	1	15	6	3	2	9	16	0	1	1	1	0	0.666667	0	0	0	0	0	1
113150290	A	G	G	G	G	G	G	1	1	1	1	1	1	11	13	2	3	2	6	1	1	0.666667	0	0	1	0	0	0	0	0	1
113765181	C	T	T	T	T	T	T	1	1	1	1	1	1	9	2	2	2	5	3	0	1	0	1	1	0	0	0	0	1	0.666667	0
113765182	A	C	C	C	C	C	C	1	1	1	1	1	1	9	2	2	2	5	3	0	1	0	1	1	0	0	0	0	1	0.666667	0
26673665	C	A	A	A	A	A	A	1	1	1	1	1	1	5	2	8	11	11	5	0	1	1	0	0	1	1	0.666667	0	0	0	0
62340674	G	A	A	A	A	A	A	1	1	1	1	1	1	2	2	2	3	3	5	0	0	1	0	0	1	0	1	1	0	0.666667	0
22662054	T	A	A	A	A	A	A	1	1	1	1	1	1	12	7	6	3	8	5	0	0	1	0	0	0.666667	0	1	0	1	1	0
106152813	G	A	A	A	A	A	A	1	1	1	1	1	1	8	5	4	2	6	2	0	0.666667	0	0	1	0	0	1	0	1	1	0
37855761	C	G	G	G	G	G	G	1	1	1	1	1	1	4	2	5	8	2	15	0	0	1	0	0.666667	0	1	1	0	0	0	1
5271472	A	C	C	C	C	C	C	1	1	1	1	1	1	6	2	1	4	2	3	0	1	0.666667	0	0	0	1	1	0	0	0	1
99920513	A	G	G	G	G	G	G	1	1	1	1	1	1	4	2	4	14	2	27	0	1	0	0	1	1	0	0	1	0	0.666667	0
99920826	G	A	A	A	A	A	A	1	1	1	1	1	1	18	3	7	6	5	13	0	1	0	0	1	1	0	0.666667	0	0	1	0
40847877	G	A	A	A	A	A	A	1	1	1	1	1	1	4	7	14	21	15	3	0	0	0	1	0.75	0.5	0.428571	1	0	0	0	1
71372822	A	G	G	G	G	G	G	1	1	1	1	1	1	2	10	2	4	5	9	1	1	1	1	0	0.4	0	0	0	0.285714	0	0
9661176	A	G	G	G	G	G	G	1	1	1	1	1	1	2	3	2	24	4	7	0	0	0.2	0.206897	1	0	0	0.285714	0	1	1	1
23931946	A	G	G	G	G	G	G	1	1	1	1	1	1	22	17	12	11	23	7	0	1	1	0.6	0.4	1	0	0	0.5	0	0.2	0
72795532	G	A	A	A	A	A	A	1	1	1	1	1	1	6	6	4	7	2	4	0	0	0	0.714286	0	1	0	0	0	1	1	1
83466018	A	G	G	G	G	G	G	1	1	1	1	1	1	24	14	15	39	6	8	0	0	0	1	0	0	0	0	1	1	1	0.714286
845738	G	A	A	A	A	A	A	1	1	1	1	1	1	98	36	19	33	53	56	0.842105	0.509091	0	0.566667	1	0.935484	0.487179	0	0	0	0	0.375
67798522	G	A	A	A	A	A	A	1	1	1	1	1	1	10	4	7	19	4	8	0	0.6	0	1	0	0.555556	1	0	1	0.571429	0	0
49396318	C	T	T	T	T	T	T	1	1	1	1	1	1	12	3	5	7	4	3	1	0	1	0	0	1	0	0.4	1	0.333333	0	0
62346808	A	T	T	T	T	T	T	1	1	1	1	1	1	8	4	7	7	4	5	0	0	1	0	1	0	0.25	1	1	0	0	0.5
103773453	G	A	A	A	A	A	A	1	1	1	1	1	1	3	18	4	23	3	19	0	0	0	1	0	0	0	0.75	0	1	1	1
99918240	C	T	T	T	T	T	T	1	1	1	1	1	1	12	8	35	62	3	45	1	0	0	0	1	1	0	1	0.761905	0	0	0
12712534	G	A	A	A	A	A	A	1	1	1	1	1	1	11	3	9	15	9	14	0	1	0	0.777778	0	0	1	0	0	1	1	0
31965075	A	C	C	C	C	C	C	1	1	1	1	1	1	5	7	2	6	6	2	0	1	1	1	0	0.4	0	0	0	0.4	1	0
32611152	T	C	C	C	C	C	C	1	1	1	1	1	1	5	5	3	10	3	18	0	0	0	0	1	0	1	0	1	0	1	0.8
5844596	G	C	C	C	C	C	C	1	1	1	1	1	1	5	4	6	27	9	33	0	0	1	0	1	1	1	0	0	0	0.372093	0.444444
845828	C	G	G	G	G	G	G	1	1	1	1	1	1	92	48	25	36	77	48	0.64	0.539474	0	0.508772	1	1	0.512821	0	0	0	0	0.625
62339331	T	A	A	A	A	A	A	1	1	1	1	1	1	6	10	6	5	3	6	0	1	1	1	0	0	0	0	0	0	0.833333	1
12042138	T	G	G	G	G	G	G	1	1	1	1	1	1	3	5	6	5	6	3	0	0	1	0	0	1	0	0	1	0	1	0.833333
40963384	T	C	C	C	C	C	C	1	1	1	1	1	1	35	45	29	48	19	29	0	0.428571	0.421053	0.486486	0	1	0	0.545455	0	0.545455	1	0.411765
81655181	C	T	T	T	T	T	T	1	1	1	1	1	1	4	5	17	3	2	10	0	1	0	0	0	0	0	1	0	1	1	0.846154
846426	C	T	T	T	T	T	T	1	1	1	1	1	1	79	110	23	49	72	28	0.571429	0.607595	0	0.557692	1	1	0.534483	0	0	0	0	0.580645
107417097	G	C	C	C	C	C	C	1	1	1	1	1	1	4	9	2	15	3	2	0	1	1	1	0	0	1	0.4	0	0	0	0.454545
14093299	G	A	A	A	A	A	A	1	1	1	1	1	1	18	11	2	6	2	7	0	0	0	0	1	0.857143	1	1	0	1	0	0
67795928	C	T	T	T	T	T	T	1	1	1	1	1	1	6	5	14	22	7	15	0	0.5	0.8	1	0	0	0	0	1	0.571429	0	1
40964049	A	G	G	G	G	G	G	1	1	1	1	1	1	50	34	9	34	15	30	0	0.714286	0.4375	0.45	0	1	1	0	0	0	1	0.285714
846343	A	G	G	G	G	G	G	1	1	1	1	1	1	70	90	22	35	47	3	0.527778	0.587302	0	0.666667	1	1	0.527778	0	0	0	0	0.583333
102793836	A	T	T	T	T	T	T	1	1	1	1	1	1	4	3	4	2	7	21	0	0	1	0.909091	1	0	1	1	0	0	0	0
60598470	G	A	A	A	A	A	A	1	1	1	1	1	1	50	17	13	7	30	5	1	0.25	1	1	0	0.666667	0	0	0	0	0	1
15572269	T	A	A	A	A	A	A	1	1	1	1	1	1	6	3	16	15	7	10	0.916667	0	0	0	1	0	1	0	1	0	0	1
57148591	T	C	C	C	C	C	C	1	1	1	1	1	1	16	9	4	5	12	13	1	0	0.25	0	0	0	0.666667	1	0	1	1	0
70495488	G	T	T	T	T	T	T	1	1	1	1	1	1	33	79	68	208	169	241	0	0.923077	0	1	1	1	0	1	0	0	0	0
62297949	G	A	A	A	A	A	A	1	1	1	1	1	1	4	5	20	28	4	25	0	0	1	1	0	1	0	0	0	0.75	0.642857	0.533333
60604119	T	C	C	C	C	C	C	1	1	1	1	1	1	136	92	36	38	62	23	0	0.477273	1	1	1	0.45	0	0	0	0	0	1
13804937	C	T	T	T	T	T	T	1	1	1	1	1	1	26	12	18	13	27	10	0	1	0.931034	1	1	1	0	0	0	0	0	0
60604118	A	G	G	G	G	G	G	1	1	1	1	1	1	135	95	37	37	63	23	0	0.477273	1	1	1	0.473684	0	0	0	0	0	1
33077116	T	G	G	G	G	G	G	1	1	1	1	1	1	2	3	6	4	2	7	0	1	1	1	1	0	0	0	0	1	0	0
41509225	C	T	T	T	T	T	T	1	1	1	1	1	1	2	6	6	4	3	2	0	1	1	1	0	1	0	0	0	0	1	0
45046350	N	G	G	G	G	G	G	1	1	1	1	1	1	5	3	2	2	2	2	0	1	1	1	0	1	0	1	0	0	0	0
39651176	A	G	G	G	G	G	G	1	1	1	1	1	1	3	12	2	9	7	10	1	0	1	1	1	0	0	0	0	1	0	0
53979843	T	C	C	C	C	C	C	1	1	1	1	1	1	6	4	2	13	21	9	1	0	1	1	1	0	0	0	0	0	0	1
11042518	G	A	A	A	A	A	A	1	1	1	1	1	1	4	3	2	5	5	11	0	0	1	1	0	1	0	1	0	1	0	0
104396778	G	A	A	A	A	A	A	1	1	1	1	1	1	19	4	2	7	11	3	0	1	1	1	0	0	0	0	0	1	1	0
60652334	T	C	C	C	C	C	C	1	1	1	1	1	1	10	6	1	3	6	7	1	0	1	0	1	0	0	1	1	0	0	0
10753165	A	G	G	G	G	G	G	1	1	1	1	1	1	16	11	15	12	12	2	1	0	1	0	1	0	1	0	0	1	0	0
48776990	G	A	A	A	A	A	A	1	1	1	1	1	1	12	6	2	7	7	6	1	0	1	1	0	0	0	0	1	0	1	0
27137405	A	G	G	G	G	G	G	1	1	1	1	1	1	4	13	2	3	3	8	1	0	1	1	0	0	1	0	1	0	0	0
27137455	T	A	A	A	A	A	A	1	1	1	1	1	1	6	19	3	5	3	14	1	0	1	1	0	0	1	0	1	0	0	0
8956882	C	G	G	G	G	G	G	1	1	1	1	1	1	3	2	4	6	4	2	1	0	1	1	0	0	0	0	1	0	1	0
106711516	T	C	C	C	C	C	C	1	1	1	1	1	1	17	5	2	23	5	2	0	1	1	1	0	0	1	0	0	1	0	0
93938261	T	C	C	C	C	C	C	1	1	1	1	1	1	2	3	2	2	9	4	0	1	1	0	1	0	0	1	0	0	1	0
77305681	A	G	G	G	G	G	G	1	1	1	1	1	1	18	14	2	13	10	7	0	0	1	1	0	1	0	0	0	1	1	0
77305683	A	T	T	T	T	T	T	1	1	1	1	1	1	18	14	2	13	10	7	0	0	1	1	0	1	0	0	0	1	1	0
99919694	C	T	T	T	T	T	T	1	1	1	1	1	1	3	2	23	26	5	25	0	1	1	0	1	0	0	1	0	0	1	0
99919720	T	C	C	C	C	C	C	1	1	1	1	1	1	3	2	23	28	6	25	1	1	0	0	1	0	0	1	0	0	1	0
99919736	C	G	G	G	G	G	G	1	1	1	1	1	1	3	2	22	26	6	24	1	1	0	0	1	0	0	1	0	0	1	0
67787284	C	A	A	A	A	A	A	1	1	1	1	1	1	2	4	8	8	10	3	0	1	1	1	0	0	0	0	0	1	1	0
22832008	A	G	G	G	G	G	G	1	1	1	1	1	1	9	2	14	11	5	4	0	1	1	1	0	0	0	1	0	1	0	0
22876847	G	T	T	T	T	T	T	1	1	1	1	1	1	8	4	14	16	12	7	1	1	0	1	0	0	0	0	1	1	0	0
2506320	A	T	T	T	T	T	T	1	1	1	1	1	1	5	2	5	5	4	2	0	0	1	1	0	1	0	1	1	0	0	0
98100300	G	A	A	A	A	A	A	1	1	1	1	1	1	2	3	21	57	3	8	1	0	1	1	0	0	1	1	0	0	0	0
21931687	T	C	C	C	C	C	C	1	1	1	1	1	1	5	4	11	11	5	5	1	0	1	1	0	0	1	1	0	0	0	0
102793838	A	T	T	T	T	T	T	1	1	1	1	1	1	5	3	4	2	9	21	0	0	1	1	1	0	1	1	0	0	0	0
17295427	C	G	G	G	G	G	G	1	1	1	1	1	1	14	6	5	6	6	5	0	1	1	1	0	0	0	0	0	1	0	1
3833120	A	T	T	T	T	T	T	1	1	1	1	1	1	5	5	3	3	2	2	0	0	1	1	1	0	1	0	0	0	0	1
60407233	A	G	G	G	G	G	G	1	1	1	1	1	1	17	17	19	46	4	15	1	0	1	0	0	1	0	1	0	0	0	1
66614306	C	T	T	T	T	T	T	1	1	1	1	1	1	2	5	6	2	8	5	1	0	1	0	1	0	0	0	0	0	1	1
115295535	T	G	G	G	G	G	G	1	1	1	1	1	1	20	12	5	12	9	29	0	0	1	1	0	1	0	0	1	0	0	1
115295541	C	T	T	T	T	T	T	1	1	1	1	1	1	20	11	5	11	9	31	0	0	1	1	0	1	0	0	1	0	0	1
156051621	T	C	C	C	C	C	C	1	1	1	1	1	1	4	3	13	8	2	4	1	0	0	1	0	1	0	0	0	0	1	1
25846602	G	A	A	A	A	A	A	1	1	1	1	1	1	6	18	19	8	10	5	1	1	1	0	0	0	0	0	0	0	1	1
25847773	T	C	C	C	C	C	C	1	1	1	1	1	1	11	4	5	11	8	2	1	0	1	1	0	0	1	0	0	0	0	1
8844559	G	A	A	A	A	A	A	1	1	1	1	1	1	10	1	4	14	6	4	1	0	1	0	1	0	0	0	0	0	1	1
45456287	G	A	A	A	A	A	A	1	1	1	1	1	1	8	8	2	4	3	10	0	0	1	1	1	0	0	1	0	0	0	1
39657089	C	G	G	G	G	G	G	1	1	1	1	1	1	10	8	10	7	7	5	0	0	0	1	1	0	1	0	0	1	1	0
39735358	A	C	C	C	C	C	C	1	1	1	1	1	1	5	4	3	3	2	3	0	1	0	0	0	1	0	1	0	1	1	0
49100357	T	C	C	C	C	C	C	1	1	1	1	1	1	5	2	3	2	4	4	0	0	0	1	1	0	0	0	1	1	1	0
49100371	T	C	C	C	C	C	C	1	1	1	1	1	1	5	2	2	2	1	4	0	0	0	1	1	0	0	0	1	1	1	0
105901587	T	C	C	C	C	C	C	1	1	1	1	1	1	3	2	2	10	4	4	0	0	1	1	0	0	1	0	1	1	0	0
47842802	G	T	T	T	T	T	T	1	1	1	1	1	1	7	2	5	7	4	15	0	0	0	1	1	0	1	1	0	1	0	0
59910260	T	G	G	G	G	G	G	1	1	1	1	1	1	2	2	6	3	2	5	0	0	1	0	1	0	1	1	0	1	0	0
86652902	G	T	T	T	T	T	T	1	1	1	1	1	1	8	6	2	4	3	5	1	0	0	0	0	1	1	1	1	0	0	0
27676541	A	C	C	C	C	C	C	1	1	1	1	1	1	12	7	3	24	5	6	1	0	0	0.333333	0	0.666667	0	1	0	1	1	0
50576204	T	C	C	C	C	C	C	1	1	1	1	1	1	15	3	3	11	8	7	0	0	1	1	0	0	1	1	0	1	0	0
117490	C	G	G	G	G	G	G	1	1	1	1	1	1	3	18	3	4	2	2	0	0	1	1	0	0	1	1	0	1	0	0
67798903	A	C	C	C	C	C	C	1	1	1	1	1	1	11	4	7	12	8	13	0	0	0.333333	1	0	0.666667	0	0	1	0	1	1
1624777	C	T	T	T	T	T	T	1	1	1	1	1	1	5	2	2	5	9	3	0	0	1	0	0	1	1	0	1	0	0	1
1624782	G	C	C	C	C	C	C	1	1	1	1	1	1	5	2	2	5	9	3	0	0	1	0	0	1	1	0	1	0	0	1
36811043	T	G	G	G	G	G	G	1	1	1	1	1	1	2	6	4	7	5	6	0	0	1	0	0	1	0	1	0	1	0	1
74714898	A	G	G	G	G	G	G	1	1	1	1	1	1	10	2	6	7	2	4	0	0	1	1	0	0	0	0	1	0	1	1
5519832	G	C	C	C	C	C	C	1	1	1	1	1	1	5	4	5	3	7	9	0	0	1	0	1	0	0	1	0	1	0	1
27949814	G	A	A	A	A	A	A	1	1	1	1	1	1	4	4	7	2	7	2	0	0	1	0	1	0	0	0	0	1	1	1
16229	A	G	G	G	G	G	G	1	1	1	1	1	1	59	45	63	115	49	65	0	1	0	0	1	0	1	0	0	1	0	1
19945552	A	G	G	G	G	G	G	1	1	1	1	1	1	9	4	6	10	4	5	0	0	1	1	0	0	0	1	0	1	0	1
41767469	A	G	G	G	G	G	G	1	1	1	1	1	1	8	10	6	11	7	3	0	1	1	0	0	0	1	0	0	0	1	1
16613248	A	G	G	G	G	G	G	1	1	1	1	1	1	2	4	4	8	3	3	0	0	0	1	1	0	0	0	1	1	0	1
16613254	C	T	T	T	T	T	T	1	1	1	1	1	1	2	5	4	8	3	3	0	0	0	1	1	0	0	0	1	1	0	1
48903821	C	T	T	T	T	T	T	1	1	1	1	1	1	16	8	3	9	11	7	0	0	0	1	0	1	0	1	0	1	0	1
47784905	G	T	T	T	T	T	T	1	1	1	1	1	1	2	10	2	7	3	6	1	1	0	0	0	0	0	0.75	1	0	0.625	0.625
20360527	G	A	A	A	A	A	A	1	1	1	1	1	1	6	12	7	3	6	11	0	0	1	1	0	0	1	0.75	0	0.25	0	1
31015523	A	G	G	G	G	G	G	1	1	1	1	1	1	13	7	6	10	10	9	0	0	1	0	0	1	0	1	0	0	1	1
62081719	A	G	G	G	G	G	G	1	1	1	1	1	1	28	10	4	14	15	2	1	0	0	1	0	0	1	0	0	0	1	1
84628628	G	C	C	C	C	C	C	1	1	1	1	1	1	4	9	5	6	6	6	0	0	1	1	0	0	1	1	0	0	0	1
12712021	G	A	A	A	A	A	A	1	1	1	1	1	1	5	3	3	11	3	7	0	0	0	1	1	0	0	0	0	1	1	1
36992193	A	G	G	G	G	G	G	1	1	1	1	1	1	8	13	6	11	3	14	0	0	1	0	0	1	1	1	0	0	0	1
51536091	A	T	T	T	T	T	T	1	1	1	1	1	1	2	3	2	2	1	2	0	0	1	0	0	1	1	1	0	0	0	1
1624782	G	C	C	C	C	C	C	1	1	1	1	1	1	5	2	2	5	9	3	0	0	1	0	0	1	1	0	1	0	0	1
130065160	A	G	G	G	G	G	G	1	1	1	1	1	1	2	4	4	2	4	3	0	1	1	0	0	0	0	0	0	1	1	1
83573290	G	A	A	A	A	A	A	1	1	1	1	1	1	7	4	4	2	8	3	0	0	1	0	0	0	0	1	1	1	1	0
88664566	T	G	G	G	G	G	G	1	1	1	1	1	1	8	9	7	2	7	9	0	1	0	0	0	0	1	1	0	1	1	0
82022276	A	G	G	G	G	G	G	1	1	1	1	1	1	17	5	3	7	10	14	0	1	0	0	0	0	0	1	1	1	1	0
53088741	A	G	G	G	G	G	G	1	1	1	1	1	1	7	5	7	4	3	9	0	0	0	0	1	0	1	1	0	0	1	1
20022988	A	T	T	T	T	T	T	1	1	1	1	1	1	3	5	2	4	4	3	0	0	1	0	0	0	1	1	0	0	1	1
6168619	G	C	C	C	C	C	C	1	1	1	1	1	1	6	3	7	6	8	22	0	0	0	0	0	1	1	1	0	0	1	1
30490348	T	C	C	C	C	C	C	1	1	1	1	1	1	8	2	3	10	4	5	0	0	1	0	0	0	0	1	0	1	1	1
30490349	T	C	C	C	C	C	C	1	1	1	1	1	1	8	2	3	10	4	5	0	0	1	0	0	0	0	1	0	1	1	1
107801381	C	A	A	A	A	A	A	1	1	1	1	1	1	2	4	2	11	2	13	0	1	0	0	0	0	1	1	0	1	0	1
3613206	C	A	A	A	A	A	A	1	1	1	1	1	1	2	4	7	6	3	32	0	0	0	0	0	1	0	0	1	1	1	1
37756014	T	C	C	C	C	C	C	1	1	1	1	1	1	4	3	23	10	3	8	0	1	0	0	0	0	0	1	0	1	1	1
37756015	G	T	T	T	T	T	T	1	1	1	1	1	1	4	4	28	10	3	10	0	1	0	0	0	0	0	1	0	1	1	1
15416407	T	C	C	C	C	C	C	1	1	1	1	1	1	11	7	4	2	7	14	0	0	1	0	0	0	1	0	0	1	1	1
15416409	T	C	C	C	C	C	C	1	1	1	1	1	1	11	7	4	2	7	14	0	0	1	0	0	0	1	0	0	1	1	1
15299786	T	G	G	G	G	G	G	1	1	1	1	1	1	2	2	9	5	5	4	1	0	0	0	0	0	0	1	1	0	1	1
21903470	C	G	G	G	G	G	G	1	1	1	1	1	1	5	11	5	4	5	3	0	0	1	0	0	0	1	0	0	1	1	1
71148726	A	G	G	G	G	G	G	1	1	1	1	1	1	5	8	3	8	21	2	0	0	1	0	0	0	1	1	1	0	0	1
105355543	T	C	C	C	C	C	C	1	1	1	1	1	1	2	6	4	2	2	8	0	0	0	0	0	1	1	0	0	1	1	1
10322831	C	T	T	T	T	T	T	1	1	1	1	1	1	12	10	5	15	3	6	0	0	1	1	1	1	0	0	0	0	1	0
10322867	T	A	A	A	A	A	A	1	1	1	1	1	1	14	10	4	15	5	6	0	0	1	1	1	1	0	1	0	0	0	0
73186619	C	T	T	T	T	T	T	1	1	1	1	1	1	15	21	4	59	21	25	1	0	1	0	1	1	0	0	0	1	0	0
74567885	T	C	C	C	C	C	C	1	1	1	1	1	1	5	10	9	4	3	14	0	1	0	1	1	1	0	1	0	0	0	0
64265136	T	C	C	C	C	C	C	1	1	1	1	1	1	32	24	5	18	5	18	0	1	1	1	1	1	0	0	0	0	0	0
64266483	A	G	G	G	G	G	G	1	1	1	1	1	1	21	8	4	10	4	18	0	1	1	1	1	1	0	0	0	0	0	0
14890560	A	G	G	G	G	G	G	1	1	1	1	1	1	26	9	21	86	26	32	0	0	1	1	1	1	0	1	0	0	0	0
9814158	A	G	G	G	G	G	G	1	1	1	1	1	1	13	9	20	23	8	9	0	1	1	0	1	1	0	1	0	0	0	0
5819721	T	C	C	C	C	C	C	1	1	1	1	1	1	16	8	14	34	9	19	0	0	0	1	1	1	0	0	1	0	1	0
36734210	T	C	C	C	C	C	C	1	1	1	1	1	1	4	9	8	2	5	4	0	0	1	0	1	1	0	1	1	0	0	0
58553252	T	C	C	C	C	C	C	1	1	1	1	1	1	6	4	6	7	4	12	1	0	1	1	1	1	0	0	0	0	0	0
99920858	A	G	G	G	G	G	G	1	1	1	1	1	1	12	3	7	6	7	12	0	1	0	0	1	1	0	1	0	0	1	0
43164011	A	G	G	G	G	G	G	1	1	1	1	1	1	5	7	4	3	3	6	0	0	1	0	1	1	0	1	1	0	0	0
63832212	T	C	C	C	C	C	C	1	1	1	1	1	1	7	3	2	2	7	13	0	0	1	1	1	1	0	0	0	1	0	0
63387673	A	G	G	G	G	G	G	1	1	1	1	1	1	30	168	62	123	259	332	0	1	0	1	1	1	0	1	0	0	0	0
8476157	C	A	A	A	A	A	A	1	1	1	1	1	1	2	2	2	4	3	7	0	0	1	0	1	1	0	0	1	0	0	1
48245273	G	A	A	A	A	A	A	1	1	1	1	1	1	16	12	8	14	14	10	0	0	0	1	1	1	1	0	0	0	0	1
113534398	T	C	C	C	C	C	C	1	1	1	1	1	1	22	4	2	10	7	4	0	0	1	1	1	1	0	0	0	0	0	1
113534399	G	C	C	C	C	C	C	1	1	1	1	1	1	22	4	1	10	7	3	0	0	1	1	1	1	0	0	0	0	0	1
5575924	T	A	A	A	A	A	A	1	1	1	1	1	1	32	2	8	11	21	9	0	0	0	0	0	0	1	1	1	1	0	1
71126167	A	T	T	T	T	T	T	1	1	1	1	1	1	13	6	2	7	10	6	0	0	1	0	1	1	0	0	0	0	1	1
101323111	C	G	G	G	G	G	G	1	1	1	1	1	1	2	3	3	3	2	2	0	0	0	0	0	0	1	1	0	1	1	1
83272849	T	G	G	G	G	G	G	1	1	1	1	1	1	2	4	3	3	2	3	0	0	1	0.888889	0.666667	0	1	1	0	0.454545	0	0
67795493	T	C	C	C	C	C	C	1	1	1	1	1	1	22	9	12	18	2	10	0	0	0.375	1	0	0.2	1	0	0	0.625	0.833333	1
846258	A	G	G	G	G	G	G	1	1	1	1	1	1	68	65	24	41	62	6	0.64	0.660714	0	0.416667	1	1	0.606061	0	0	0	0	0.72093
60604166	A	G	G	G	G	G	G	1	1	1	1	1	1	152	96	28	49	80	38	0.285714	0.292683	1	1	1	0.473684	0	0	0	0	0	1
57516439	G	A	A	A	A	A	A	1	1	1	1	1	1	6	2	4	7	4	6	0	1	1	0.333333	0.333333	0.571429	0.333333	0	0.541667	0.7	0	0.25
43185203	A	G	G	G	G	G	G	1	1	1	1	1	1	4	5	9	3	4	6	1	0	0	0.666667	0	1	0	1	0	0.4	1	0
26317751	C	T	T	T	T	T	T	1	1	1	1	1	1	24	9	4	4	13	4	0	0	1	1	0	0	0	1	0	0.4	1	0.666667
40640157	A	G	G	G	G	G	G	1	1	1	1	1	1	3	3	8	18	5	8	1	0	1	0.769231	1	1	0	0	0	0.333333	0	0
60455279	G	C	C	C	C	C	C	1	1	1	1	1	1	9	4	20	15	3	6	1	1	0	0.769231	1	0	0	0.625	0	0.384615	0.375	0
67795842	T	C	C	C	C	C	C	1	1	1	1	1	1	2	5	3	16	10	16	0	1	0.555556	1	0	0	0	0	1	0.6	0	1
99920515	G	A	A	A	A	A	A	1	1	1	1	1	1	3	2	4	14	2	26	0	1	0	0	1	1	0	0.5	1	0	0.666667	0
40848094	G	A	A	A	A	A	A	1	1	1	1	1	1	2	8	8	14	6	13	0	0	0	1	0.6	1	0	1	0.428571	0	0.153846	1
60455195	T	A	A	A	A	A	A	1	1	1	1	1	1	7	3	8	13	6	6	0	1	0	0.666667	0	0.6	0	0.5	0.8	0.428571	0.4	0.8
22825214	C	G	G	G	G	G	G	1	1	1	1	1	1	207	135	177	181	48	83	0	0.469388	0	0	0	0.453488	0.580645	0.604938	1	0.522523	0.569231	1
25050387	T	C	C	C	C	C	C	1	1	1	1	1	1	21	23	8	24	12	10	0	1	0	1	0	0	0.428571	0.4	0.375	0	1	1
24972085	G	A	A	A	A	A	A	1	1	1	1	1	1	91	85	76	55	70	104	0	0.466667	1	0.5625	0	1	0	0.637255	0.55102	0.54717	0.441176	0
71529501	C	T	T	T	T	T	T	1	1	1	1	1	1	65	38	25	42	22	31	0.392857	1	0	0.45098	0.538462	0.322581	1	0.526316	0	0.516129	0.484848	0
22825200	G	T	T	T	T	T	T	1	1	1	1	1	1	194	138	169	180	49	87	0	0.510638	0	0	0	0.442857	0.575342	0.622517	1	0.514286	0.571429	1
39279090	C	T	T	T	T	T	T	1	1	1	1	1	1	2	4	13	19	6	2	0	0	0	0.692308	0.4	0	0.428571	0.7	0.571429	0.888889	0.56	1
35933626	C	A	A	A	A	A	A	1	1	1	1	1	1	24	11	4	11	10	27	1	1	0	1	1	0	0	0.5	0	0.75	0	0
5903614	C	T	T	T	T	T	T	1	1	1	1	1	1	7	2	12	13	14	11	0	1	0	0	0.5	1	0.75	1	0	0	1	0
22836095	A	G	G	G	G	G	G	1	1	1	1	1	1	48	16	26	48	17	9	0	0.636364	0	0	0	0.733333	0.647059	0.3	1	0.55	0.416667	1
1581801	C	A	A	A	A	A	A	1	1	1	1	1	1	3	3	2	8	9	5	0.8	1	1	0	1	0	1	0	0	0	0.5	0
53814332	A	G	G	G	G	G	G	1	1	1	1	1	1	18	14	16	24	14	7	1	0.333333	1	1	0	1	0	1	0	0	0	0
46930772	C	A	A	A	A	A	A	1	1	1	1	1	1	3	2	6	6	2	9	0	0	1	1	0	0	0.666667	1	0	1	0.666667	0
60455272	T	C	C	C	C	C	C	1	1	1	1	1	1	10	6	20	15	3	6	1	1	0	0.714286	1	0	0	0.666667	0.166667	0.454545	0.333333	0
6076416	A	T	T	T	T	T	T	1	1	1	1	1	1	10	11	15	31	2	28	0	0	0.666667	0.5	0.571429	0.666667	0.444444	1	0	1	0	0.5
76774047	A	G	G	G	G	G	G	1	1	1	1	1	1	20	7	2	5	8	12	0	1	1	0.4	1	0	0	0.555556	0	0.4	0	1
37359581	G	C	C	C	C	C	C	1	1	1	1	1	1	14	16	8	17	11	36	0	0	0.5	0	0	1	0	1	0.75	0.307692	0.8	1
77890845	G	C	C	C	C	C	C	1	1	1	1	1	1	12	4	4	5	8	17	1	0.666667	0.565217	1	1	0.4	0	0	0.285714	0	0	0.444444
26304225	T	C	C	C	C	C	C	1	1	1	1	1	1	5	8	8	12	5	9	0.777778	1	1	1	1	0	0	0.6	0	0	0	0
99919605	G	A	A	A	A	A	A	1	1	1	1	1	1	2	3	14	20	3	5	0	1	1	0	1	0	0	0.714286	1	0	0.666667	0
27693475	A	G	G	G	G	G	G	1	1	1	1	1	1	15	31	13	35	10	7	0	0.8	1	1	0	0	0	0.333333	0	0.25	1	1
22845131	C	T	T	T	T	T	T	1	1	1	1	1	1	23	10	8	12	4	9	0	0.666667	1	0	0	1	0	1	0	0	1	0.727273
60619631	G	A	A	A	A	A	A	1	1	1	1	1	1	122	52	64	124	47	59	0.444444	0.5	1	1	1	0.454545	0	0	0	0	0	1
5134563	A	G	G	G	G	G	G	1	1	1	1	1	1	6	7	2	8	3	3	0.4	1	1	0	0	0	0	0	1	1	1	0
845996	G	C	C	C	C	C	C	1	1	1	1	1	1	33	25	3	5	39	2	0.777778	0.533333	0	0.818182	0.916667	1	0.692308	0	0	0	0	0.666667
44081076	T	C	C	C	C	C	C	1	1	1	1	1	1	15	15	10	13	16	25	0	0.285714	1	1	0	0.7	1	1	0	0	0.428571	0
40963482	G	A	A	A	A	A	A	1	1	1	1	1	1	34	21	26	33	13	40	0	0.538462	0.769231	0.387097	0	1	0.6	0.6	0	0.538462	1	0
50328289	C	T	T	T	T	T	T	1	1	1	1	1	1	34	29	24	16	18	40	0	0	0	0.272727	0.4375	0.5	0.3	1	0.9	0.666667	0.357143	1
114616854	C	G	G	G	G	G	G	1	1	1	1	1	1	5	7	5	4	6	3	0.444444	1	1	1	0	0	0	0	0	1	0	1
10684232	T	C	C	C	C	C	C	1	1	1	1	1	1	21	12	11	20	8	20	0	0	1	1	1	0	0.75	0.333333	0	1	0.363636	0
28353339	C	T	T	T	T	T	T	1	1	1	1	1	1	11	21	2	5	6	4	0	1	0.4	0	0.333333	0.625	0.428571	0.375	0	0.285714	1	1
71416318	T	G	G	G	G	G	G	1	1	1	1	1	1	44	77	77	90	44	47	0.294118	0.64	0.508197	0	0.615385	0	1	0	0.384615	0.481481	0.535714	1
20644864	T	C	C	C	C	C	C	1	1	1	1	1	1	51	61	45	40	29	43	1	0.366667	0.965517	0.388889	0	1	0	0.594595	0	0.518519	0	0.631579
15928631	T	C	C	C	C	C	C	1	1	1	1	1	1	13	27	20	24	25	21	1	1	0	0.642857	0	0.608696	0.4375	0.5	0.285714	0	0	1
6076436	A	G	G	G	G	G	G	1	1	1	1	1	1	7	7	8	27	2	15	0	0	0.75	0.5	0.666667	1	0.571429	0	0	1	1	0
6064304	A	T	T	T	T	T	T	1	1	1	1	1	1	2	2	4	16	5	10	0	1	0.571429	0	0.71875	1	0.2	1	0	1	0	0
15927831	T	C	C	C	C	C	C	1	1	1	1	1	1	27	23	22	13	12	18	1	1	0	0.625	0	0.32	0.6	0.545455	0.4	0	0	1
34951198	C	A	A	A	A	A	A	1	1	1	1	1	1	21	8	5	10	11	11	0	1	1	0.181818	1	0.4	0.3125	0	0	0.6	0	1
6111876	T	C	C	C	C	C	C	1	1	1	1	1	1	5	6	7	33	17	39	0	1	0.5	1	0	1	0	1	0	1	0	0
92745605	G	A	A	A	A	A	A	1	1	1	1	1	1	4	9	2	3	3	2	0	1	0	1	1	0	0	0.5	1	1	0	0
1024758	A	G	G	G	G	G	G	1	1	1	1	1	1	2	4	7	8	3	4	0	0	1	1	0	1	0	0	0	1	0.5	1
7093568	G	A	A	A	A	A	A	1	1	1	1	1	1	2	7	4	8	2	4	1	0	0.5	0	1	0	1	0	1	0	0	1
22260946	C	T	T	T	T	T	T	1	1	1	1	1	1	2	2	2	2	4	4	0	0	0	1	1	0	1	1	0	0.5	0	1
95095939	T	A	A	A	A	A	A	1	1	1	1	1	1	6	5	1	14	6	1	0	1	1	0	0	0	1	1	0	0	1	0.5
111201063	G	A	A	A	A	A	A	1	1	1	1	1	1	3	6	5	4	5	4	1	0	0	0	0	1	1	0	0	1	1	0.5
19142613	G	A	A	A	A	A	A	1	1	1	1	1	1	2	5	6	4	2	5	0	0	0.5	1	0	0	1	1	1	0	0	1
5874651	A	G	G	G	G	G	G	1	1	1	1	1	1	5	6	40	82	31	186	0.75	1	0.492537	0.833333	0.204545	0.666667	0.465116	0.736842	0.153846	0.2	0	0
40962973	T	C	C	C	C	C	C	1	1	1	1	1	1	60	34	11	19	25	33	0	0.434783	0.692308	0.510638	0	1	0	0.888889	0	0.5625	1	0.428571
99918706	C	T	T	T	T	T	T	1	1	1	1	1	1	5	4	11	10	11	12	1	0	0.75	0	1	1	0	1	0.769231	0	0	0
60455165	G	A	A	A	A	A	A	1	1	1	1	1	1	5	4	10	11	6	7	0	1	0	0.666667	0	0.5	0	0.777778	0.833333	0.6	0.285714	0.857143
39279091	A	T	T	T	T	T	T	1	1	1	1	1	1	2	4	13	18	6	2	0	0	0	0.666667	0.333333	0.4	0.428571	0.7	0.571429	0.888889	0.56	1
62878974	A	G	G	G	G	G	G	1	1	1	1	1	1	16	8	10	32	8	6	0.375	1	0	0.375	1	0	0.8	0	0	1	1	0
24971993	T	C	C	C	C	C	C	1	1	1	1	1	1	35	16	26	8	17	32	0	0.590909	1	0.484848	0	1	0	0.842105	0.6	0.480769	0.56	0
44780537	T	C	C	C	C	C	C	1	1	1	1	1	1	17	4	2	5	10	2	0	0.888889	1	0.857143	0	0	1	0.833333	0	1	0	0
23667263	A	G	G	G	G	G	G	1	1	1	1	1	1	16	22	11	13	7	2	1	1	0.777778	0	1	1	0.333333	0	0	0.473684	0	0
57123554	G	A	A	A	A	A	A	1	1	1	1	1	1	23	13	10	10	5	4	0.333333	1	0	0.714286	0	0	0.545455	1	1	0	0	1
71420482	T	G	G	G	G	G	G	1	1	1	1	1	1	75	83	52	80	58	34	0.416667	0.348837	1	0.53	0.377358	0.314815	1	0.52809	0	0.622222	0.455556	0
9919786	G	A	A	A	A	A	A	1	1	1	1	1	1	11	3	9	3	8	6	0	1	1	0.333333	1	0	0	0	0	0.6	0.666667	1
27056467	C	G	G	G	G	G	G	1	1	1	1	1	1	4	4	2	2	5	9	0	1	1	0.333333	1	0.6	0	0	0.666667	0	1	0
77541136	G	C	C	C	C	C	C	1	1	1	1	1	1	7	23	12	20	2	49	0	0	0	0.608696	1	0	0	1	0	1	1	1
62295900	G	A	A	A	A	A	A	1	1	1	1	1	1	5	6	2	5	2	10	0	1	1	1	0	0	1	0	0	0	0.909091	0.714286
60957212	G	T	T	T	T	T	T	1	1	1	1	1	1	5	12	9	29	3	20	0	1	1	1	0	1	0	0	0	1	0	0.625
13451634	C	T	T	T	T	T	T	1	1	1	1	1	1	10	11	3	8	17	7	0	1	1	1	0	0	0	0	1	0.75	0.5	0.375
28571252	T	C	C	C	C	C	C	1	1	1	1	1	1	22	11	6	16	10	9	0	1	1	0.625	1	1	0	0	0	0	0	1
60453932	T	C	C	C	C	C	C	1	1	1	1	1	1	15	3	16	23	4	8	1	1	0	0.5	1	0.375	0	0.526316	0.666667	0.5625	0	0
69463840	C	T	T	T	T	T	T	1	1	1	1	1	1	12	2	7	3	4	5	0	1	0.833333	0	1	0	1	0	0	0	0.8	1
71517165	C	T	T	T	T	T	T	1	1	1	1	1	1	42	23	5	21	25	24	0	1	1	0.380952	0	0.6	1	0.333333	0	0.75	0.571429	0
114595516	C	T	T	T	T	T	T	1	1	1	1	1	1	24	21	2	15	16	10	0	1	0.333333	1	0	0.75	0.571429	0	0	1	0	1
71416176	G	A	A	A	A	A	A	1	1	1	1	1	1	12	14	13	15	13	21	0.357143	0.6	0.571429	0	0.611111	0	1	0	0.210526	1	0.3125	1
49068123	G	C	C	C	C	C	C	1	1	1	1	1	1	6	19	8	11	9	4	0	1	1	1	1	0	0	0	0	1	0.666667	0
70028967	T	C	C	C	C	C	C	1	1	1	1	1	1	2	3	4	6	2	5	0	1	1	1	0	1	0.666667	0	0	0	0	1
30558335	T	C	C	C	C	C	C	1	1	1	1	1	1	14	10	7	6	11	2	0	0	1	1	0	1	0	1	0	0.666667	1	0
30238715	G	C	C	C	C	C	C	1	1	1	1	1	1	5	11	3	7	6	2	0	1	1	1	0	0	1	0	0	0.666667	0	1
67798336	A	G	G	G	G	G	G	1	1	1	1	1	1	13	16	10	13	6	14	0	0.666667	0	1	0	0.75	1	0	1	0	0.25	1
30064539	A	G	G	G	G	G	G	1	1	1	1	1	1	4	7	2	4	9	6	0	1	0	1	0	0	1	1	0	0.666667	0	1
26156024	A	T	T	T	T	T	T	1	1	1	1	1	1	13	2	3	3	3	7	0	0	1	0	1	1	1	0	0	0.666667	1	0
26445308	C	T	T	T	T	T	T	1	1	1	1	1	1	9	4	3	3	3	4	0	1	1	0.666667	1	1	1	0	0	0	0	0
18834840	T	G	G	G	G	G	G	1	1	1	1	1	1	7	2	5	5	3	2	0	1	1	0	0.666667	1	0	1	0	1	0	0
1564168	G	C	C	C	C	C	C	1	1	1	1	1	1	2	12	11	5	2	9	0	0	1	1	1	1	0.666667	0	0	0	1	0
57512686	C	A	A	A	A	A	A	1	1	1	1	1	1	8	7	2	4	2	6	1	0	1	0.666667	1	1	0	1	0	0	0	0
71517159	A	G	G	G	G	G	G	1	1	1	1	1	1	41	20	4	21	23	24	0	1	1	0.4	0	0.6	1	0.272727	0	0.842105	0.571429	0
5850656	A	G	G	G	G	G	G	1	1	1	1	1	1	2	2	6	13	7	26	0	0	1	0	1	1	1	0.6	0	0	0.5625	0.545455
21768011	C	T	T	T	T	T	T	1	1	1	1	1	1	4	8	2	11	2	8	0	0	1	0.714286	1	1	1	1	0	0	0	0
67796326	C	T	T	T	T	T	T	1	1	1	1	1	1	9	7	11	17	7	20	0	0	0.571429	1	0	0.5	1	0	1	0	0.714286	0.928571
59827173	G	C	C	C	C	C	C	1	1	1	1	1	1	4	4	7	16	6	44	0	1	0	0	1	0.266667	1	0	0	1	1	0.456522
48061743	G	A	A	A	A	A	A	1	1	1	1	1	1	12	19	7	8	4	4	0	1	0	0	0	0.666667	1	1	0.571429	0.5	0	1
86521068	T	C	C	C	C	C	C	1	1	1	1	1	1	179	162	55	110	98	154	0.952381	0.193277	0.980392	1	1	1	0	0.266667	0.126984	0	0	0.223404
1040969	A	G	G	G	G	G	G	1	1	1	1	1	1	3	5	8	2	2	6	0	1	1	1	1	0	0	0	0	1	0.75	0
57516659	G	A	A	A	A	A	A	1	1	1	1	1	1	7	3	2	3	7	2	0	1	1	0.75	0	1	1	0	0	1	0	0
6116547	C	A	A	A	A	A	A	1	1	1	1	1	1	8	2	7	18	9	19	0	0	0.75	0	1	1	1	1	0	1	0	0
6116548	A	G	G	G	G	G	G	1	1	1	1	1	1	8	2	8	12	9	19	0	0	0.75	0	1	1	1	1	0	1	0	0
86619950	C	G	G	G	G	G	G	1	1	1	1	1	1	8	3	8	10	11	11	0	0	1	1	1	1	0	0	0	0.75	0	1
20057207	T	A	A	A	A	A	A	1	1	1	1	1	1	65	43	13	36	33	19	0	0.5	0.464286	0.326087	0.25	1	1	0.4	0	1	0.35	0.470588
6130614	C	T	T	T	T	T	T	1	1	1	1	1	1	2	9	5	15	10	21	0	1	0	0	0	0	1	1	0	1	0.764706	1
71416210	C	T	T	T	T	T	T	1	1	1	1	1	1	17	26	19	36	23	21	0.315789	0.666667	0.526316	0	0.642857	0	1	0	0.263158	1	0.368421	1
33036657	T	C	C	C	C	C	C	1	1	1	1	1	1	32	11	17	29	9	20	0.8	1	0.5	0.266667	0.6875	0.416667	0	1	0.384615	0.375	0.36	0
12975299	A	G	G	G	G	G	G	1	1	1	1	1	1	11	15	18	13	3	11	0	0	0.8	1	1	0	0	1	0	0	1	1
39528597	G	C	C	C	C	C	C	1	1	1	1	1	1	3	2	2	4	2	4	0	0	0	1	0	0	1	1	0	0.8	1	1
10105049	G	A	A	A	A	A	A	1	1	1	1	1	1	37	17	15	43	10	48	1	0.8	1	1	1	1	0	0	0	0	0	0
25704315	G	A	A	A	A	A	A	1	1	1	1	1	1	12	6	4	6	2	4	0	1	0	0	0.8	1	0	0	0	1	1	1
37801271	C	G	G	G	G	G	G	1	1	1	1	1	1	14	9	2	8	9	10	1	0.3	1	1	1	1	0	0	0	0	0.272727	0.230769
141201106	G	T	T	T	T	T	T	1	1	1	1	1	1	8	19	15	14	8	7	0	1	0	0	0	1	0	0.809524	0	1	1	1
23931656	A	G	G	G	G	G	G	1	1	1	1	1	1	11	2	3	10	3	7	0.428571	1	1	0.75	0	1	0	0	0	0.8	0.833333	0
141201118	A	T	T	T	T	T	T	1	1	1	1	1	1	8	21	16	16	11	9	0	1	0	0	0	1	0	0.818182	0	1	1	1
3818557	T	C	C	C	C	C	C	1	1	1	1	1	1	9	29	10	21	14	9	0.6	1	0	0.333333	0	0.25	0.384615	0.307692	0.857143	0.375	1	0.714286
62472865	A	T	T	T	T	T	T	1	1	1	1	1	1	13	6	15	24	18	3	1	0	1	0.5	0	1	1	0	1	0	0	0.333333
48993208	A	G	G	G	G	G	G	1	1	1	1	1	1	8	6	2	8	3	9	0	1	1	1	1	1	0	0	0.5	0.333333	0	0
56428673	A	G	G	G	G	G	G	1	1	1	1	1	1	3	2	6	8	2	12	0	0	1	0	1	1	1	0	1	0	0	0.833333
32532164	T	A	A	A	A	A	A	1	1	1	1	1	1	9	8	5	7	11	6	1	0	0	1	0	0	0	1	0.846154	0	1	1
141201153	T	A	A	A	A	A	A	1	1	1	1	1	1	12	26	32	25	12	15	0	1	0	0	0	1	0	0.851852	0	1	1	1
10694656	T	C	C	C	C	C	C	1	1	1	1	1	1	16	7	3	6	5	3	1	0	0.875	1	0	1	0	0	0	1	1	0
67797271	G	A	A	A	A	A	A	1	1	1	1	1	1	4	11	3	8	11	10	0	0	0.7	1	0	0.8	1	0	1	0.375	0	1
62340550	G	A	A	A	A	A	A	1	1	1	1	1	1	3	2	5	2	3	2	0	0	1	0	0	1	0	1	1	1	0.375	0.5
30366744	A	G	G	G	G	G	G	1	1	1	1	1	1	23	20	19	12	25	12	1	1	0.933333	0	0.944444	1	0	0	0	0	0	1
27688716	A	G	G	G	G	G	G	1	1	1	1	1	1	5	11	27	69	10	10	1	0	0	0.545455	0.411765	0	0.434783	0.916667	0.761905	0.3	1	0.512195
846380	A	C	C	C	C	C	C	1	1	1	1	1	1	80	119	25	43	75	17	0.560976	0.565789	0	0.619048	1	1	0.480769	0.65625	0.444444	0	0	0.55814
72774164	C	T	T	T	T	T	T	1	1	1	1	1	1	17	5	11	21	7	8	0.666667	1	1	1	0	1	0	0.222222	0	0	1	0
9526683	A	G	G	G	G	G	G	1	1	1	1	1	1	13	14	15	18	34	48	0.888889	1	1	1	1	1	0	0	0	0	0	0
89331571	A	G	G	G	G	G	G	1	1	1	1	1	1	12	1	8	3	3	4	0	0	1	1	0	0	1	1	1	0	0	0.9
75195039	A	C	C	C	C	C	C	1	1	1	1	1	1	2	3	5	4	4	5	0	1	1	1	1	1	0	0.909091	0	0	0	0
846179	C	T	T	T	T	T	T	1	1	1	1	1	1	85	73	39	45	96	14	0.717391	0.609756	0	0.433333	1	1	0.520833	0.469388	0.5	0	0	0.66129
46836869	C	T	T	T	T	T	T	1	1	1	1	1	1	30	35	12	60	30	29	0.2	0.761905	1	0	0.833333	0.368421	1	0.5	0	0	0.25	1
5851513	T	C	C	C	C	C	C	1	1	1	1	1	1	5	44	49	86	45	127	0	1	0.916667	1	1	1	0	1	0	0	0	0
1563394	C	G	G	G	G	G	G	1	1	1	1	1	1	78	115	92	135	53	41	0.4	0.392857	1	0	1	1	0.385246	0.414141	0.385321	0.4	0.543478	0
6128415	A	C	C	C	C	C	C	1	1	1	1	1	1	10	14	10	17	4	24	0	1	0	0	1	0	0	1	0	1	0.923077	1
6130445	T	C	C	C	C	C	C	1	1	1	1	1	1	16	15	8	16	18	46	0	1	0	0	0	0	1	1	0	1	0.923077	1
40962687	A	G	G	G	G	G	G	1	1	1	1	1	1	70	41	51	61	44	50	0	0.357143	0.466667	0.645833	0.333333	1	0	0.4	0.576923	0.75	1	0.4
60121904	A	G	G	G	G	G	G	1	1	1	1	1	1	2	7	8	11	10	2	0	0	1	0.666667	1	0	0.238095	0.636364	1	1	0	0.388889
50591332	A	G	G	G	G	G	G	1	1	1	1	1	1	9	6	9	16	19	6	1	1	1	0.6	1	1	0	0	0	0	0	0.333333
72668455	C	T	T	T	T	T	T	1	1	1	1	1	1	6	12	75	40	8	20	0	1	1	1	0.933333	1	0	1	0	0	0	0
54114951	G	C	C	C	C	C	C	1	1	1	1	1	1	7	2	5	5	3	4	0	0	0	1	0	1	0.6	0.8	1	1	0.5625	0
67797310	C	T	T	T	T	T	T	1	1	1	1	1	1	5	7	2	8	10	6	0	0	0.818182	1	0	0.75	1	0	1	0.4	0	1
57317249	A	G	G	G	G	G	G	1	1	1	1	1	1	122	199	430	454	133	150	0	1	1	0.989247	1	1	0	0.979592	0	0	0	0
27602261	T	C	C	C	C	C	C	1	1	1	1	1	1	74	59	6	34	15	10	0	0	0.818182	1	0	0	0.666667	0.666667	0	0.818182	1	1
11048976	T	C	C	C	C	C	C	1	1	1	1	1	1	59	50	37	59	40	52	0	1	0.54902	0	0.461538	0.534884	0.314286	0.28	0.384615	1	0.454545	1
33036929	G	A	A	A	A	A	A	1	1	1	1	1	1	34	20	28	49	27	23	0.307692	1	0.378378	0.470588	0.7	0.548387	0	1	0.555556	0.52381	0.5	0
10684294	C	T	T	T	T	T	T	1	1	1	1	1	1	19	20	12	17	5	29	0	0.6	1	0.958333	1	0	0.428571	0.555556	0	1	0.444444	0
7380326	A	C	C	C	C	C	C	1	1	1	1	1	1	2	4	8	12	3	5	1	0	1	1	1	0.363636	0.631579	0	0	0.777778	0	0.222222
60588065	A	G	G	G	G	G	G	1	1	1	1	1	1	14	6	3	8	21	2	0	0	0.545455	1	0	0.7	1	0	1	1	0	0.75
104395038	G	C	C	C	C	C	C	1	1	1	1	1	1	4	7	7	9	5	6	0	1	1	1	1	0	1	0	0	1	0	0
44960433	G	A	A	A	A	A	A	1	1	1	1	1	1	5	9	4	8	4	3	0	1	1	1	0	1	0	1	0	1	0	0
59706305	C	T	T	T	T	T	T	1	1	1	1	1	1	58	29	3	28	50	26	0	1	1	1	1	0	0	0	0	1	1	0
56429085	C	T	T	T	T	T	T	1	1	1	1	1	1	4	2	13	14	2	11	0	1	1	1	1	0	0	1	1	0	0	0
36355851	G	A	A	A	A	A	A	1	1	1	1	1	1	19	7	4	10	7	4	0	1	1	1	1	0	1	0	0	1	0	0
13281195	A	G	G	G	G	G	G	1	1	1	1	1	1	6	4	6	3	4	10	1	0	1	1	0	1	1	0	1	0	0	0
14092957	C	A	A	A	A	A	A	1	1	1	1	1	1	3	2	4	2	4	2	1	1	1	1	0	0	0	0	0	1	0	1
3187370	A	G	G	G	G	G	G	1	1	1	1	1	1	38	26	2	44	39	14	1	0	1	1	1	0	1	0	0	0	0	1
108157578	G	T	T	T	T	T	T	1	1	1	1	1	1	8	9	3	2	8	13	0	1	1	1	0	1	0	0	0	0	1	1
113837071	T	C	C	C	C	C	C	1	1	1	1	1	1	3	2	4	2	2	2	0	1	1	1	0	1	0	1	0	0	0	1
80489347	A	G	G	G	G	G	G	1	1	1	1	1	1	3	2	2	9	4	7	1	0	1	1	0	1	0	0	0	0	1	1
80489352	A	G	G	G	G	G	G	1	1	1	1	1	1	3	2	2	9	4	7	1	0	1	1	0	1	0	0	0	0	1	1
80489359	G	A	A	A	A	A	A	1	1	1	1	1	1	3	2	2	9	4	7	1	0	1	1	0	1	0	0	0	0	1	1
11042512	G	T	T	T	T	T	T	1	1	1	1	1	1	4	3	3	5	6	11	0	0	1	1	0	1	1	1	0	1	0	0
32653193	A	G	G	G	G	G	G	1	1	1	1	1	1	2	6	3	5	2	4	0	1	1	0	1	0	0	1	0	1	1	0
63558931	G	A	A	A	A	A	A	1	1	1	1	1	1	11	2	4	8	7	9	1	1	0	0	1	0	0	1	0	1	1	0
89124016	A	G	G	G	G	G	G	1	1	1	1	1	1	18	20	3	9	2	3	1	0	1	0	0	1	1	1	0	1	0	0
20194527	T	C	C	C	C	C	C	1	1	1	1	1	1	5	4	2	8	4	3	1	1	1	0	0	0	0	0	1	1	1	0
17216182	A	C	C	C	C	C	C	1	1	1	1	1	1	7	4	2	2	9	8	0	0	1	1	0	1	0	1	0	1	1	0
61788829	T	C	C	C	C	C	C	1	1	1	1	1	1	7	12	20	22	4	7	0	0	1	1	0	1	1	0	1	0	1	0
117320566	A	G	G	G	G	G	G	1	1	1	1	1	1	13	6	2	8	13	8	0	0	1	1	0	1	1	0	1	1	0	0
77322992	C	T	T	T	T	T	T	1	1	1	1	1	1	14	16	5	6	3	1	0	0	1	1	1	0	1	0	0	1	1	0
99919685	C	T	T	T	T	T	T	1	1	1	1	1	1	3	2	24	28	6	23	0	1	1	0	1	0	0	1	1	0	1	0
17564449	T	C	C	C	C	C	C	1	1	1	1	1	1	23	15	7	13	8	10	0	0	1	1	0	1	1	1	0	0	1	0
62075970	C	T	T	T	T	T	T	1	1	1	1	1	1	2	2	2	6	8	4	0	0	1	1	0	1	0	1	1	1	0	0
60670904	T	A	A	A	A	A	A	1	1	1	1	1	1	9	12	5	13	5	7	0	0	1	1	1	0	1	0	1	0	1	0
17295255	G	A	A	A	A	A	A	1	1	1	1	1	1	4	5	6	5	2	5	0	1	1	1	0	0	1	0	0	0	1	1
17295393	G	A	A	A	A	A	A	1	1	1	1	1	1	14	8	9	10	2	8	0	1	1	1	0	0	1	0	0	1	0	1
55823708	A	G	G	G	G	G	G	1	1	1	1	1	1	2	6	2	3	6	4	0	1	1	0	1	0	1	0	1	0	0	1
82887033	G	A	A	A	A	A	A	1	1	1	1	1	1	6	5	14	8	5	7	1	0	0	1	1	0	0	0	1	0	1	1
43340888	A	G	G	G	G	G	G	1	1	1	1	1	1	2	5	5	5	5	12	0	1	1	1	0	0	1	0	0	0	1	1
63567327	C	T	T	T	T	T	T	1	1	1	1	1	1	12	5	2	7	2	5	0	1	1	1	0	0	1	0	0	0	1	1
44962147	A	G	G	G	G	G	G	1	1	1	1	1	1	5	2	4	8	2	5	1	0	1	0	1	0	0	1	0	1	0	1
49397455	G	C	C	C	C	C	C	1	1	1	1	1	1	7	2	2	2	3	2	0	1	1	1	0	0	0	1	0	1	0	1
130780909	C	T	T	T	T	T	T	1	1	1	1	1	1	8	6	2	11	8	5	0	1	0	1	1	0	1	0	0	0	1	1
31960262	A	G	G	G	G	G	G	1	1	1	1	1	1	4	4	4	5	2	4	0	0	1	1	1	0	0	1	0	1	0	1
711861	T	C	C	C	C	C	C	1	1	1	1	1	1	5	2	3	3	6	7	0	1	1	1	0	0	0	0	1	1	0	1
13451736	A	G	G	G	G	G	G	1	1	1	1	1	1	18	12	5	8	13	11	0	1	1	1	0	0	0	1	0	0.666667	1	0.333333
2492206	T	C	C	C	C	C	C	1	1	1	1	1	1	7	6	5	5	5	9	0	1	1	1	0	0	1	0	0	0	1	1
4675633	G	A	A	A	A	A	A	1	1	1	1	1	1	12	13	4	10	3	21	1	0	0	1	0	1	1	0	1	0	0	1
20230732	A	C	C	C	C	C	C	1	1	1	1	1	1	7	5	1	4	2	2	0	0	1	1	0	1	1	0	1	0	0	1
104181460	G	C	C	C	C	C	C	1	1	1	1	1	1	4	4	4	7	2	9	0	1	1	1	0	0	0	0	0	1	1	1
33508480	G	A	A	A	A	A	A	1	1	1	1	1	1	16	2	3	2	7	3	0	0	1	1	1	0	0	0	0	1	1	1
1398942	G	C	C	C	C	C	C	1	1	1	1	1	1	8	2	4	14	11	30	0	1	1	0	0	1	0	1	0	1	0	1
37682063	C	A	A	A	A	A	A	1	1	1	1	1	1	6	3	3	10	2	2	0	1	1	0	1	0	0	1	1	0	0	1
15346045	T	C	C	C	C	C	C	1	1	1	1	1	1	8	10	4	5	3	3	1	1	0	0	1	0	0	0	0	1	1	1
15346189	C	A	A	A	A	A	A	1	1	1	1	1	1	10	25	5	10	13	14	0	0	1	1	0	1	0	0	1	0	1	1
98881431	A	C	C	C	C	C	C	1	1	1	1	1	1	13	11	8	6	5	7	0	1	1	1	0	0	0	1	0	1	0	1
98881436	A	C	C	C	C	C	C	1	1	1	1	1	1	13	11	8	6	5	7	0	1	1	1	0	0	0	1	0	1	0	1
80489388	T	C	C	C	C	C	C	1	1	1	1	1	1	3	2	2	9	4	7	1	0	1	1	0	0	0	0	0	1	1	1
50575933	G	A	A	A	A	A	A	1	1	1	1	1	1	12	8	2	5	7	4	0	0	1	1	0	1	0	0	1	1	0	1
38537468	A	G	G	G	G	G	G	1	1	1	1	1	1	6	2	9	2	4	1	0	0	1	1	0	1	0	0	0	1	1	1
50718823	T	A	A	A	A	A	A	1	1	1	1	1	1	4	3	5	2	5	7	0	1	1	1	0	0	0	1	0	0	1	1
50718828	T	C	C	C	C	C	C	1	1	1	1	1	1	4	7	5	2	10	7	0	1	1	1	0	0	0	1	0	0	1	1
8407	A	G	G	G	G	G	G	1	1	1	1	1	1	24	14	3	10	3	4	0	0	1	1	0	1	1	0	0	0	1	1
1649225	T	C	C	C	C	C	C	1	1	1	1	1	1	4	6	6	9	5	8	1	0	0	1	0	0	1	0	1	1	1	0
65203871	G	A	A	A	A	A	A	1	1	1	1	1	1	3	2	2	3	8	13	0	0	1	1	0	0	1	1	1	0	0	1
57238854	G	T	T	T	T	T	T	1	1	1	1	1	1	3	6	2	2	3	3	0	0	1	1	0	0	0	1	0	1	1	1
55922368	C	T	T	T	T	T	T	1	1	1	1	1	1	8	8	1	13	2	1	0	1	0	0	1	0	1	1	0	1	0	1
55922380	A	C	C	C	C	C	C	1	1	1	1	1	1	7	7	3	15	3	5	0	1	0	0	1	0	1	1	0	1	0	1
55922389	G	T	T	T	T	T	T	1	1	1	1	1	1	7	7	3	13	3	6	0	1	0	0	1	0	1	1	0	1	0	1
30490350	C	A	A	A	A	A	A	1	1	1	1	1	1	8	2	3	10	4	5	0	0	1	1	0	0	0	1	0	1	1	1
106967950	T	C	C	C	C	C	C	1	1	1	1	1	1	3	7	4	14	8	9	0	0	0	1	1	0	1	1	0	1	0	1
106967976	C	T	T	T	T	T	T	1	1	1	1	1	1	3	7	2	6	6	10	0	0	0	1	1	0	1	1	0	1	0	1
106967984	T	C	C	C	C	C	C	1	1	1	1	1	1	3	7	2	13	5	9	0	0	0	1	1	0	1	1	0	1	0	1
106967991	A	G	G	G	G	G	G	1	1	1	1	1	1	3	8	2	19	4	7	0	0	0	1	1	0	1	1	0	1	0	1
32612585	T	G	G	G	G	G	G	1	1	1	1	1	1	2	2	3	14	3	3	0	0	0	1	0	1	0	0	1	1	1	1
47842846	C	T	T	T	T	T	T	1	1	1	1	1	1	6	2	6	9	4	20	0	0	0	1	1	0	1	1	0	1	0	1
52763522	T	C	C	C	C	C	C	1	1	1	1	1	1	13	11	3	7	6	4	0	0	1	0	0	1	1	0	0	1	1	1
52763524	A	C	C	C	C	C	C	1	1	1	1	1	1	13	11	3	7	6	4	0	0	1	0	0	1	1	0	0	1	1	1
2492724	T	C	C	C	C	C	C	1	1	1	1	1	1	5	3	3	2	3	3	0	0	1	1	0	0	0	1	0	1	1	1
2492730	T	C	C	C	C	C	C	1	1	1	1	1	1	5	3	3	2	3	3	0	0	1	1	0	0	0	1	0	1	1	1
52322749	G	T	T	T	T	T	T	1	1	1	1	1	1	8	4	18	24	11	19	0	0	1	0	0	1	1	1	1	0	0	1
89922329	A	G	G	G	G	G	G	1	1	1	1	1	1	4	4	6	11	4	6	0	0	0	1	0	1	1	0	0	1	1	1
19446417	G	A	A	A	A	A	A	1	1	1	1	1	1	2	4	2	4	3	5	0	1	0	0	0	1	0	1	0	1	1	1
19446504	A	G	G	G	G	G	G	1	1	1	1	1	1	4	6	2	3	5	6	0	1	0	0	0	1	0	1	1	1	0	1
64539773	G	A	A	A	A	A	A	1	1	1	1	1	1	6	7	2	23	3	3	0	0	0	1	1	0	1	1	1	0	0	1
110680976	G	C	C	C	C	C	C	1	1	1	1	1	1	10	6	13	19	12	7	0	0	1	0	0	1	1	1	0	0	1	1
7073910	A	G	G	G	G	G	G	1	1	1	1	1	1	7	4	2	4	2	5	1	0	0	1	0	0	1	1	1	0	0	1
51050096	T	C	C	C	C	C	C	1	1	1	1	1	1	10	24	5	26	5	36	1	0	0	0	0	1	1	1	1	0	0	1
89980076	A	G	G	G	G	G	G	1	1	1	1	1	1	1	3	6	11	3	8	0	0	0	1	1	0	1	0	1	1	0	1
79281903	A	C	C	C	C	C	C	1	1	1	1	1	1	4	2	5	9	7	3	0	0	0	1	0	1	1	1	1	0	0	1
33150550	T	A	A	A	A	A	A	1	1	1	1	1	1	5	24	20	31	7	6	0	0	0	1	0	0	1	1	1	1	0	1
18834842	T	C	C	C	C	C	C	1	1	1	1	1	1	7	1	5	5	3	2	0	1	1	0	1	1	0	1	0	1	0	0
107308863	A	G	G	G	G	G	G	1	1	1	1	1	1	7	10	11	6	3	3	1	0	0	1	1	1	0	1	0	0	1	0
14890519	T	G	G	G	G	G	G	1	1	1	1	1	1	26	11	26	89	26	40	0	1	1	1	1	1	0	1	0	0	0	0
8368173	G	A	A	A	A	A	A	1	1	1	1	1	1	2	4	2	3	6	3	0	0	1	1	1	1	0	1	1	0	0	0
5909881	T	C	C	C	C	C	C	1	1	1	1	1	1	2	6	6	3	2	23	0	0	1	1	1	1	1	0	1	0	0	0
5932694	T	C	C	C	C	C	C	1	1	1	1	1	1	29	26	216	180	36	48	0	1	1	1	1	1	0	1	0	0	0	0
1564723	T	G	G	G	G	G	G	1	1	1	1	1	1	6	10	4	7	4	4	0	1	1	1	1	1	0	1	0	0	0	0
131499424	A	G	G	G	G	G	G	1	1	1	1	1	1	10	12	3	9	9	7	0	0	1	1	1	1	1	0	0	1	0	0
4812214	C	T	T	T	T	T	T	1	1	1	1	1	1	5	8	60	43	3	12	0	1	1	1	1	1	0	1	0	0	0	0
1649881	A	C	C	C	C	C	C	1	1	1	1	1	1	4	2	3	4	7	3	0	1	1	1	1	1	0	1	0	0	0	0
3159956	A	G	G	G	G	G	G	1	1	1	1	1	1	24	23	7	22	14	10	0	1	1	1	1	1	1	0	0	0	0	0
265746	A	G	G	G	G	G	G	1	1	1	1	1	1	21	94	87	123	104	187	0	1	1	1	1	1	0	1	0	0	0	0
84980730	T	C	C	C	C	C	C	1	1	1	1	1	1	29	46	79	83	44	59	0	1	1	1	1	1	0	1	0	0	0	0
25704378	T	C	C	C	C	C	C	1	1	1	1	1	1	19	6	9	7	6	2	1	1	0	0	1	1	0	0	0	1	1	0
16766032	A	G	G	G	G	G	G	1	1	1	1	1	1	2	4	7	13	2	20	1	0	0	1	1	1	0	0	1	0	1	0
85902065	C	G	G	G	G	G	G	1	1	1	1	1	1	5	4	3	6	2	3	0	1	1	0	1	1	0	0	0	1	1	0
72644598	A	G	G	G	G	G	G	1	1	1	1	1	1	22	24	92	83	12	44	0	1	1	1	1	1	0	1	0	0	0	0
944399	C	G	G	G	G	G	G	1	1	1	1	1	1	13	11	6	10	5	5	0	0	1	1	1	1	0	0	0	1	0	1
7608231	C	T	T	T	T	T	T	1	1	1	1	1	1	9	4	6	4	1	7	0	0	0	0	1	1	1	1	0	0	1	1
25190985	A	G	G	G	G	G	G	1	1	1	1	1	1	19	16	13	6	5	2	0	0	0	0	1	1	1	1	0	0	1	1
16229263	C	A	A	A	A	A	A	1	1	1	1	1	1	8	2	11	5	2	4	0	1	1	0	1	1	1	0	0	0	0	1
9661343	T	A	A	A	A	A	A	1	1	1	1	1	1	5	3	3	6	5	6	0	0	1	1	1	1	1	0	0	0	0	1
27897549	G	C	C	C	C	C	C	1	1	1	1	1	1	7	5	2	9	3	9	1	1	0	0	1	1	0	0	0	0	1	1
33744371	A	G	G	G	G	G	G	1	1	1	1	1	1	10	5	5	9	4	3	0	1	0	1	1	1	0	1	0	0	0	1
99437171	C	G	G	G	G	G	G	1	1	1	1	1	1	7	2	10	10	2	13	1	0	0	1	1	1	0	1	0	0	0	1
71126163	C	A	A	A	A	A	A	1	1	1	1	1	1	13	6	2	7	9	4	0	0	1	0	1	1	1	0	0	0	1	1
71126166	T	C	C	C	C	C	C	1	1	1	1	1	1	12	6	2	7	9	4	0	0	1	0	1	1	1	0	0	0	1	1
101088099	G	C	C	C	C	C	C	1	1	1	1	1	1	15	37	14	21	20	2	0	1	1	1	1	1	0.555556	0	0	0	0	0.454545
67795432	C	T	T	T	T	T	T	1	1	1	1	1	1	11	6	18	14	6	18	0	0	0.368421	1	0	0.388889	1	0	1	0.857143	0.4	1
54562956	T	C	C	C	C	C	C	1	1	1	1	1	1	20	18	2	2	9	15	0	1	0	0.428571	1	0.571429	0.307692	0.461538	0	0.25	1	1
29968468	G	C	C	C	C	C	C	1	1	1	1	1	1	40	10	4	34	7	9	1	1	1	1	1	0.4	0	0	0	0	0.153846	0.466667
60455330	T	G	G	G	G	G	G	1	1	1	1	1	1	201	169	141	141	71	182	1	1	0	0.507042	0.964912	0.484536	0	0.482517	0.392857	0.395833	0.418033	0.3875
57123242	A	G	G	G	G	G	G	1	1	1	1	1	1	20	8	4	24	9	14	0	1	0.666667	0	0	0	0.375	1	0	1	1	1
29367047	A	G	G	G	G	G	G	1	1	1	1	1	1	8	2	2	9	8	2	0	1	1	0	0	0.75	1	0.8	0	0.5	1	0
66732113	A	G	G	G	G	G	G	1	1	1	1	1	1	15	8	2	3	8	4	0	1	1	1	1	0	0	0	0	0.333333	0.727273	1
28401749	G	C	C	C	C	C	C	1	1	1	1	1	1	23	23	25	33	6	25	0	0	0.727273	1	0	1	1	1	0	0.333333	0	1
53417012	A	T	T	T	T	T	T	1	1	1	1	1	1	16	3	5	14	5	11	0	0.571429	0	1	1	1	0	0	0	1	0.5	1
48831255	C	T	T	T	T	T	T	1	1	1	1	1	1	20	9	6	13	5	5	1	0.454545	1	1	0	1	0	0	1	0.625	0	0
61526066	T	C	C	C	C	C	C	1	1	1	1	1	1	13	11	12	6	4	8	0	1	0.333333	0	0	0	1	1	1	0	1	0.75
72795232	G	A	A	A	A	A	A	1	1	1	1	1	1	2	4	4	19	7	4	0	0	0	0.777778	0.75	1	0	1	0	1	1	0.555556
38484964	C	T	T	T	T	T	T	1	1	1	1	1	1	6	4	2	7	11	6	0	0.8	1	0	0	0	0.285714	1	0	1	1	1
60455435	C	G	G	G	G	G	G	1	1	1	1	1	1	191	172	126	146	81	125	1	1	0	0.450867	1	0.43	0	0.521008	0.28125	0.396476	0.485149	0.527778
99047339	A	G	G	G	G	G	G	1	1	1	1	1	1	84	36	42	122	51	47	0.407407	0	0	0.317073	1	0.37037	1	1	0	1	0	1
77263741	A	T	T	T	T	T	T	1	1	1	1	1	1	2	5	5	9	17	21	0	0.8	1	1	0	1	0	1	0	1	0.3	0
38844605	A	G	G	G	G	G	G	1	1	1	1	1	1	25	13	10	7	21	8	1	1	0.615385	1	1	1	0	0	0	0	0	0.5
69414853	A	G	G	G	G	G	G	1	1	1	1	1	1	7	5	5	2	2	7	1	0	0.666667	0	0	0	1	0.75	0.7	1	0	1
86683369	G	A	A	A	A	A	A	1	1	1	1	1	1	12	19	19	22	2	2	1	0	0.666667	0	0	0	0.571429	0.888889	1	0	1	1
78254219	T	C	C	C	C	C	C	1	1	1	1	1	1	11	15	16	26	17	22	1	0.583333	1	1	1	0	0	0	0	0.5	0.666667	0.384615
29368827	C	T	T	T	T	T	T	1	1	1	1	1	1	6	5	2	6	6	2	0	0	1	0.833333	0	1	0.666667	1	0	0.636364	0	1
9678890	T	C	C	C	C	C	C	1	1	1	1	1	1	2	3	8	12	4	3	0	0	1	1	1	1	0.636364	1	0	0.5	0	0
99920556	G	A	A	A	A	A	A	1	1	1	1	1	1	2	3	7	11	2	30	0	1	1	0	1	1	0	0.6	1	0	0.545455	0
67794563	G	A	A	A	A	A	A	1	1	1	1	1	1	12	3	2	4	4	2	0	1	0.8	1	0	0.75	1	0	0	0	0.6	1
48429570	G	C	C	C	C	C	C	1	1	1	1	1	1	3	2	2	9	2	6	0	1	0	0	0	1	1	1	0	0.4	0.764706	1
56300055	T	C	C	C	C	C	C	1	1	1	1	1	1	17	23	4	10	5	18	0	1	1	1	0	1	1	0	0	0.666667	0.5	0
28123304	G	A	A	A	A	A	A	1	1	1	1	1	1	7	7	6	5	7	3	1	0	1	0.5	0	1	1	0.666667	0	0	1	0
6128545	G	A	A	A	A	A	A	1	1	1	1	1	1	18	18	10	8	12	10	0	1	0	0.5	0	0	1	1	0	1	0.666667	1
42025154	A	C	C	C	C	C	C	1	1	1	1	1	1	3	2	4	3	5	8	1	1	0	1	0	1	0	0	0.75	1	0	0.428571
46836593	C	T	T	T	T	T	T	1	1	1	1	1	1	39	20	50	61	23	70	0	0.764706	1	0	1	0.538462	1	0.52381	0	0	0.375	0.976744
120905867	G	A	A	A	A	A	A	1	1	1	1	1	1	2	10	3	9	13	11	1	0	1	1	0	0.444444	1	0	0	0	0.736842	1
6143047	A	G	G	G	G	G	G	1	1	1	1	1	1	13	4	13	11	8	13	0	0	0	0	1	1	1	0	0.181818	1	1	1
110336822	G	T	T	T	T	T	T	1	1	1	1	1	1	13	3	2	15	6	4	0	1	1	1	0	1	0	0	1	0	1	0.181818
32612058	G	A	A	A	A	A	A	1	1	1	1	1	1	2	8	6	10	5	6	0	1	0	0	1	1	0.6	0	1	0	1	0.583333
47795195	A	G	G	G	G	G	G	1	1	1	1	1	1	15	21	5	25	10	18	0	0.555556	0	1	1	0	0	0.777778	0.571429	0.875	0.666667	0.75
2128723	T	C	C	C	C	C	C	1	1	1	1	1	1	9	3	2	3	6	2	1	1	1	0	0	1	0	0	0	1	0.6	0.6
43076821	G	A	A	A	A	A	A	1	1	1	1	1	1	16	10	16	14	3	3	0	0.473684	0.545455	1	1	0	1	0	0	0.384615	0.8	1
28312087	A	T	T	T	T	T	T	1	1	1	1	1	1	67	63	35	69	18	42	0	1	0.4375	0.516129	0.833333	0.416667	0	0.6	0	0.461538	1	0.947368
3360934	C	T	T	T	T	T	T	1	1	1	1	1	1	46	41	49	60	53	58	0	0	0.388889	0.896552	0	0	1	1	1	0.428571	1	0.5
19538365	C	A	A	A	A	A	A	1	1	1	1	1	1	33	13	16	17	13	19	0	1	1	1	0.153846	1	1	0	0	0.461538	0.6	0
33037083	T	C	C	C	C	C	C	1	1	1	1	1	1	42	34	15	39	17	35	0	1	0.521739	0.7	0.769231	0.473684	0	1	0.789474	0.608696	0.354839	0
57516862	C	T	T	T	T	T	T	1	1	1	1	1	1	36	24	10	33	9	12	0	1	0.6	0.473684	1	1	1	1	0	0	0	0.166667
42962286	T	C	C	C	C	C	C	1	1	1	1	1	1	180	131	20	62	28	71	1	0	0.9875	1	0.604938	0	1	0.382353	0.268657	0	0	1
71419100	A	G	G	G	G	G	G	1	1	1	1	1	1	16	33	28	62	21	27	0.888889	1	0.941176	0.25	0.538462	0	1	0	0	0.625	0	1
70714180	A	G	G	G	G	G	G	1	1	1	1	1	1	13	2	8	5	13	7	0	1	0	0	0.25	0	1	1	0	1	1	1
39199217	C	T	T	T	T	T	T	1	1	1	1	1	1	26	21	11	32	12	43	0	0	0	1	1	1	0.5	1	1	0	0	0.75
10165520	G	A	A	A	A	A	A	1	1	1	1	1	1	4	2	19	19	4	3	0.6	0	1	0.4	1	1	0.583333	1	0.222222	0	0	0.461538
9616918	C	G	G	G	G	G	G	1	1	1	1	1	1	3	6	12	8	32	48	1	0	1	1	1	1	0.453125	0	0	0.285714	0	0.529412
39741020	T	C	C	C	C	C	C	1	1	1	1	1	1	9	8	5	6	9	14	0	1	1	1	0	1	0	0	0	0.285714	1	1
83299585	A	G	G	G	G	G	G	1	1	1	1	1	1	72	72	24	60	30	47	0.323529	0.35	1	0.737705	0	0.34375	0	0.447368	1	0.648649	1	0.442308
86173740	C	T	T	T	T	T	T	1	1	1	1	1	1	3	2	4	2	6	3	0	0	1	0.5	1	1	0	1	0	0	1	0.8
16349836	T	C	C	C	C	C	C	1	1	1	1	1	1	3	5	3	4	3	4	0	0	0.6	1	0.75	0	0.666667	0.625	0	0.666667	1	1
43124733	T	G	G	G	G	G	G	1	1	1	1	1	1	3	4	2	7	2	4	1	0	1	0	1	0	0.888889	1	0	0.428571	0	1
46154174	A	C	C	C	C	C	C	1	1	1	1	1	1	11	8	2	4	12	33	1	1	0.941176	0.5	0.333333	0	0	1	0	0	0.548387	1
75680378	A	G	G	G	G	G	G	1	1	1	1	1	1	6	10	13	19	7	27	1	1	0.4	0.551724	0.6	0	0.444444	0	0	0.333333	1	1
67795661	G	A	A	A	A	A	A	1	1	1	1	1	1	8	5	21	28	9	3	0	0.875	0.454545	1	0	0	1	0	1	0	1	1
2971230	C	T	T	T	T	T	T	1	1	1	1	1	1	3	9	4	13	3	2	0	1	1	1	0	1	0	0	1	0.333333	1	0
4638077	T	C	C	C	C	C	C	1	1	1	1	1	1	3	4	5	7	2	3	1	0	1	1	1	0	0.333333	1	0	0	1	0
4713631	G	A	A	A	A	A	A	1	1	1	1	1	1	4	4	3	4	5	6	1	0	1	0	1	0	0.333333	1	0	1	1	0
17829757	A	C	C	C	C	C	C	1	1	1	1	1	1	3	10	5	5	3	6	0	0.333333	0	1	0	1	1	0	0	1	1	1
67159879	T	C	C	C	C	C	C	1	1	1	1	1	1	3	2	4	3	5	10	0	0	0	1	1	0	1	0.333333	1	1	1	0
27279196	T	C	C	C	C	C	C	1	1	1	1	1	1	3	6	2	6	9	2	0	0	1	0.833333	1	1	0	0	1	0.5	1	0
6118584	G	C	C	C	C	C	C	1	1	1	1	1	1	16	12	18	28	14	97	0	1	0	0	0.666667	1	0	1	0	1	0.666667	1
72481470	T	C	C	C	C	C	C	1	1	1	1	1	1	2	4	3	3	3	6	0	0	1	1	1	1	0	1	0	0	0.666667	0.666667
21464651	A	G	G	G	G	G	G	1	1	1	1	1	1	5	9	8	12	7	7	0.4	0	1	0.8	1	1	0.272727	0.451613	1	0	0.424242	0
21391719	G	A	A	A	A	A	A	1	1	1	1	1	1	16	16	4	11	11	3	0	1	1	1	0	0	0	0.75	1	0.6	1	0
105624124	G	A	A	A	A	A	A	1	1	1	1	1	1	6	4	2	7	2	7	0	0	0	1	1	1	0	1	0.857143	0.5	1	0
62264436	C	T	T	T	T	T	T	1	1	1	1	1	1	7	12	16	26	6	18	0	1	0	1	1	1	1	0	0	0.5	0.416667	0.444444
54627211	T	G	G	G	G	G	G	1	1	1	1	1	1	10	17	3	6	8	24	0	1	1	1	1	1	0	0.5	0	0.571429	0	0.3
20468394	T	C	C	C	C	C	C	1	1	1	1	1	1	20	6	6	19	3	8	0	0	1	0	1	1	1	1	0	0.375	0	1
30564856	A	G	G	G	G	G	G	1	1	1	1	1	1	28	17	9	10	5	28	0	1	1	1	1	1	1	0	0	0	0	0.375
20567459	T	C	C	C	C	C	C	1	1	1	1	1	1	27	25	13	29	7	11	1	1	0	0	0.333333	0.866667	0	1	0.588235	0.390244	0.578947	0.625
30622231	T	C	C	C	C	C	C	1	1	1	1	1	1	67	78	31	54	27	13	0.365385	0.4	0.295455	0	1	1	1	0	0	0.333333	1	1
35200104	C	T	T	T	T	T	T	1	1	1	1	1	1	7	8	13	24	12	25	0	1	1	0.4	1	1	0	0.75	0	0	0.75	0.5
83299590	T	C	C	C	C	C	C	1	1	1	1	1	1	71	72	25	59	29	45	0.3125	0.421053	1	0.766667	0	0.296296	0	0.472222	1	0.655172	1	0.477273
20440078	G	A	A	A	A	A	A	1	1	1	1	1	1	7	2	2	5	3	4	1	0	1	1	0	0.666667	0	1	0	0	1	0.75
40848224	C	T	T	T	T	T	T	1	1	1	1	1	1	3	9	14	16	16	16	0.285714	0.6	0	1	0.333333	0.5	0.375	1	0.25	0.636364	0.4375	1
43151165	G	A	A	A	A	A	A	1	1	1	1	1	1	4	10	15	17	8	2	0	0.315789	0.666667	1	0	1	1	0	0	0.4375	1	1
36991660	C	T	T	T	T	T	T	1	1	1	1	1	1	16	20	8	6	18	12	0	0	1	0.428571	0.333333	1	0	1	1	0.666667	0	1
40963213	A	G	G	G	G	G	G	1	1	1	1	1	1	44	16	12	27	32	34	0	0.636364	0.714286	0.52	0	1	1	0.357143	0.333333	0.333333	1	0.545455
25498932	A	T	T	T	T	T	T	1	1	1	1	1	1	12	14	5	17	13	7	0.142857	0	0	0	1	0	0.5	1	1	1	1	0.8
71186268	T	C	C	C	C	C	C	1	1	1	1	1	1	11	7	3	6	6	7	0	1	1	1	1	1	1	0	0	0	0	0.454545
41979402	C	T	T	T	T	T	T	1	1	1	1	1	1	19	24	8	17	10	35	1	1	1	1	0.5	0	0.357143	0	0	0.6	0	1
32155374	A	G	G	G	G	G	G	1	1	1	1	1	1	2	2	2	3	2	5	0	0	0	1	1	1	0	0	1	1	1	0.461538
77890901	G	T	T	T	T	T	T	1	1	1	1	1	1	11	2	6	8	6	24	1	1	0.925926	1	1	1	0	0	0	0	0	0.535714
40848516	C	T	T	T	T	T	T	1	1	1	1	1	1	2	10	3	10	5	10	0.363636	0	0	0.888889	0.7	0.6	0.62963	1	0.333333	0.666667	0.28	1
90321455	A	G	G	G	G	G	G	1	1	1	1	1	1	3	4	6	21	6	11	0.666667	0	1	1	0.5	0	0	0	0.8	1	0.5	1
57501150	C	A	A	A	A	A	A	1	1	1	1	1	1	2	1	9	2	1	6	0	0	1	1	0	1	0.8	0.666667	0	0	1	1
10104600	G	A	A	A	A	A	A	1	1	1	1	1	1	49	39	44	61	14	62	1	1	1	1	1	1	0	0.466667	0	0	0	0
44378861	G	A	A	A	A	A	A	1	1	1	1	1	1	22	3	5	15	18	48	0.555556	0	0.75	0	1	0.5	0	0.666667	1	0	1	1
42965638	T	C	C	C	C	C	C	1	1	1	1	1	1	132	95	20	63	43	58	1	0	1	1	0.490909	0	1	0.383333	0.36	0	0.238095	1
87247333	C	T	T	T	T	T	T	1	1	1	1	1	1	9	5	15	7	4	5	1	0.588235	0	0.5	0	1	0.4	0.285714	0	0.714286	1	1
39597350	C	T	T	T	T	T	T	1	1	1	1	1	1	6	7	3	12	6	11	1	0	0	0.833333	0.333333	0	0.75	0.666667	0	1	1	0.909091
5853165	A	G	G	G	G	G	G	1	1	1	1	1	1	10	3	21	32	2	36	0	1	1	0	1	1	1	0.6	0	0	0.56	0.333333
23484491	T	C	C	C	C	C	C	1	1	1	1	1	1	12	5	3	2	2	3	0	1	1	1	0	1	0	0.5	0	1	1	0
104181440	C	T	T	T	T	T	T	1	1	1	1	1	1	8	4	5	8	5	15	0	1	1	1	0	0.5	0	0	0	1	1	1
43812989	T	C	C	C	C	C	C	1	1	1	1	1	1	12	3	3	3	4	4	0	1	1	1	0	0	1	1	0	1	0	0.5
43087370	C	G	G	G	G	G	G	1	1	1	1	1	1	4	7	2	8	4	5	1	0	1	1	0	0	0	1	0	1	0.5	1
27926067	A	G	G	G	G	G	G	1	1	1	1	1	1	2	4	2	3	17	5	0	1	0	0	0	1	1	0	1	0.5	1	1
49624441	A	C	C	C	C	C	C	1	1	1	1	1	1	4	8	12	2	4	8	0	1	1	1	1	1	1	0	0	0	0.5	0
6135091	A	G	G	G	G	G	G	1	1	1	1	1	1	13	17	10	19	15	42	0	1	0	0	0.5	1	0	1	0	1	1	1
55129854	T	A	A	A	A	A	A	1	1	1	1	1	1	6	19	6	11	13	5	0	1	1	1	1	0	1	0	0	0.875	0.642857	0
66994824	A	G	G	G	G	G	G	1	1	1	1	1	1	14	6	11	21	10	10	0	1	1	1	0	0.642857	0.442308	0.684211	0	1	0.5	0.25
60453725	A	G	G	G	G	G	G	1	1	1	1	1	1	14	2	14	11	2	4	1	1	0	0.65625	1	0.75	0	0.466667	0.485714	0.363636	0.2	0.6
83588031	T	C	C	C	C	C	C	1	1	1	1	1	1	6	8	2	2	4	2	0	0.75	1	1	0	0	1	1	0	0.777778	1	0
40962094	T	C	C	C	C	C	C	1	1	1	1	1	1	123	82	71	100	40	58	0.382979	0.423077	0.702703	0.538462	0.434783	1	0.2	0.575	0.32	0.5	1	0.476923
40962686	C	T	T	T	T	T	T	1	1	1	1	1	1	81	40	52	58	46	50	0	0.428571	0.529412	0.666667	0.333333	1	0.5	0.4	0.56	0.75	1	0.4
47184773	G	A	A	A	A	A	A	1	1	1	1	1	1	19	19	9	6	7	17	0	0.571429	0.6	0.8	0	0	1	1	0	1	0.6	1
11140521	C	T	T	T	T	T	T	1	1	1	1	1	1	67	34	49	100	86	180	0	1	1	0	0.5	1	0.521739	1	0.153846	0.666667	0.385965	0.346939
5853178	G	A	A	A	A	A	A	1	1	1	1	1	1	9	3	23	32	3	35	0	1	1	0	1	1	1	0.666667	0	0	0.576923	0.333333
23658077	G	A	A	A	A	A	A	1	1	1	1	1	1	17	21	25	14	6	2	1	1	0	0.444444	1	1	1	0	0.375	0.384615	0	0.375
46932320	T	A	A	A	A	A	A	1	1	1	1	1	1	3	5	10	5	5	4	0	1	1	1	0.222222	0.5	0	1	1	0	0.857143	0
40848306	T	C	C	C	C	C	C	1	1	1	1	1	1	2	6	15	13	7	21	0.222222	0.5	0	1	0.375	0.428571	0.55	1	0.5	0.466667	0.538462	1
36355891	T	C	C	C	C	C	C	1	1	1	1	1	1	23	6	7	9	13	9	0	1	1	1	1	0	1	1	0	0.583333	0	0
72012266	A	G	G	G	G	G	G	1	1	1	1	1	1	25	16	18	23	9	19	1	1	0.583333	1	1	1	0	1	0	0	0	0
20178491	T	C	C	C	C	C	C	1	1	1	1	1	1	2	5	2	4	4	3	0	0	1	1	1	1	0	1	0.333333	0.5	0	0.75
5856987	G	T	T	T	T	T	T	1	1	1	1	1	1	28	47	207	249	43	275	1	1	0	1	0	0	1	0.618705	0.979275	0	0.489796	0.498099
51118552	A	G	G	G	G	G	G	1	1	1	1	1	1	1	2	15	15	7	6	1	0	0.375	1	1	0.5	0	0.454545	1	0.666667	0	0.6
55953017	G	C	C	C	C	C	C	1	1	1	1	1	1	3	8	9	3	5	4	0	1	1	0.6	0	0	0	1	1	1	1	0
43734607	T	C	C	C	C	C	C	1	1	1	1	1	1	8	10	2	13	5	3	0	0	0	1	1	1	0.6	0	0	1	1	1
77904908	C	T	T	T	T	T	T	1	1	1	1	1	1	8	15	3	12	16	14	0	1	1	1	0	0	1	1	0.4	0.5	0	0.714286
38843015	A	G	G	G	G	G	G	1	1	1	1	1	1	30	15	5	12	17	14	1	0	0.428571	1	1	1	0.142857	0	0.473684	0	0.571429	1
67770217	A	G	G	G	G	G	G	1	1	1	1	1	1	36	16	27	36	16	33	1	0.380952	1	1	1	1	0.333333	0	0	0.333333	0.32	0.25
71418623	C	G	G	G	G	G	G	1	1	1	1	1	1	49	31	50	99	40	32	0.533333	1	0.727273	0	0.571429	0	1	0	1	0.285714	0.5	1
60453968	C	T	T	T	T	T	T	1	1	1	1	1	1	9	5	4	17	3	9	1	1	0	0.571429	1	0.333333	0	0.647059	0.782609	0.545455	0.166667	0.571429
114712786	G	A	A	A	A	A	A	1	1	1	1	1	1	35	50	10	24	13	22	0.535714	1	0.428571	1	0	0.64	0.7	0	0.32	1	0	1
46837170	G	C	C	C	C	C	C	1	1	1	1	1	1	46	44	19	51	37	40	0	1	1	0	1	0.466667	1	0.571429	0	0	0.59375	1
63558963	T	C	C	C	C	C	C	1	1	1	1	1	1	13	3	4	8	10	8	0	1	0.8	0	1	0	0.833333	1	0	1	1	0
40848307	G	A	A	A	A	A	A	1	1	1	1	1	1	2	6	14	13	8	21	0	0.75	0	1	0.333333	0.428571	0.571429	1	0.545455	0.466667	0.538462	1
23661947	C	T	T	T	T	T	T	1	1	1	1	1	1	1400	579	267	407	749	372	1	1	0.995054	0.416386	1	1	0.418559	0	0.425791	0.38454	0	0
114700345	G	A	A	A	A	A	A	1	1	1	1	1	1	36	83	24	28	14	17	0.56	1	0.595745	0.955056	0	0.617647	0.431373	0	0.5	1	0	1
28357668	T	C	C	C	C	C	C	1	1	1	1	1	1	55	13	16	13	18	6	0	1	0.782609	0.4	0.833333	0.375	0.5	0.333333	0	0.4375	1	1
53421033	A	G	G	G	G	G	G	1	1	1	1	1	1	5	2	5	6	6	2	0	1	1	1	0	1	0	0	0	0.666667	1	1
31339443	G	A	A	A	A	A	A	1	1	1	1	1	1	5	4	3	4	2	4	0	0	1	1	0	1	1	0.666667	1	1	0	0
53995469	T	C	C	C	C	C	C	1	1	1	1	1	1	9	2	5	3	2	8	0	0	1	1	0	1	0	0.666667	0	1	1	1
104037705	G	T	T	T	T	T	T	1	1	1	1	1	1	6	5	2	3	3	3	0	0	0.666667	1	0	1	1	1	0	1	1	0
18834838	T	G	G	G	G	G	G	1	1	1	1	1	1	7	2	4	5	3	2	0	1	1	0	0.666667	1	0	1	1	1	0	0
53144011	C	A	A	A	A	A	A	1	1	1	1	1	1	17	2	13	8	6	2	1	0	0.666667	1	1	1	1	0	1	0	0	0
45732982	T	C	C	C	C	C	C	1	1	1	1	1	1	8	11	2	5	6	2	0	1	1	1	1	1	0	1	0	0.666667	0	0
1564147	G	C	C	C	C	C	C	1	1	1	1	1	1	2	10	11	9	2	8	0	0	1	1	1	1	0.666667	1	0	0	1	0
23658370	C	T	T	T	T	T	T	1	1	1	1	1	1	740	244	146	184	401	170	1	1	0.993399	0.439394	1	1	0.42402	0	0.442105	0.374332	0	0
32637969	C	T	T	T	T	T	T	1	1	1	1	1	1	2	24	2	6	5	8	1	1	0.8	1	1	1	0	0.5	0	0	0.375	0
10075216	A	G	G	G	G	G	G	1	1	1	1	1	1	9	11	2	5	7	7	1	1	1	0.8	0	1	0.7	0	0	0.5	0	0.684211
32798691	T	C	C	C	C	C	C	1	1	1	1	1	1	31	3	8	21	21	3	0.5	1	0.47619	0.222222	0.6	0.888889	1	0	0	0	1	1
38844623	A	G	G	G	G	G	G	1	1	1	1	1	1	24	14	11	6	21	7	1	1	0.692308	1	1	1	0	0	0	0	0	1
42453064	T	C	C	C	C	C	C	1	1	1	1	1	1	6	2	12	12	3	7	0	0.6	1	1	1	0.6	0	1	0	0.5	1	0
40963051	G	A	A	A	A	A	A	1	1	1	1	1	1	58	28	19	38	30	16	0	0.433333	0.71875	0.387755	0.25	1	0.428571	1	0.5	0.608696	1	0.375
19166147	A	G	G	G	G	G	G	1	1	1	1	1	1	6	5	5	11	2	28	0	1	0	0.266667	0.444444	0	1	1	0	1	1	1
65749946	A	C	C	C	C	C	C	1	1	1	1	1	1	8	8	8	3	4	2	1	1	1	1	0	1	0	0	0	1	0	0.714286
36320680	A	G	G	G	G	G	G	1	1	1	1	1	1	25	3	12	14	11	2	1	1	1	1	1	1	0	0	0	0.714286	0	0
54522134	C	T	T	T	T	T	T	1	1	1	1	1	1	43	34	35	46	27	53	0.40625	1	0	0.514286	1	0.428571	0.44186	0.452381	0.5	0.6	0.375	1
57504637	C	A	A	A	A	A	A	1	1	1	1	1	1	9	7	8	19	12	12	1	0.727273	1	0	1	1	0	0	0	1	1	0
37471616	T	C	C	C	C	C	C	1	1	1	1	1	1	42	24	9	18	18	8	0	0.6	1	1	1	1	1	0.333333	0	0.4	0.4	0
4993595	G	T	T	T	T	T	T	1	1	1	1	1	1	7	12	7	22	17	15	0	1	1	0.416667	0	0.875	0.444444	0	1	1	1	0
40962072	A	G	G	G	G	G	G	1	1	1	1	1	1	128	76	73	103	36	63	0.404762	0.416667	0.692308	0.573171	0.277778	1	0.352941	0.615385	0.348837	0.555556	1	0.5
40848321	T	C	C	C	C	C	C	1	1	1	1	1	1	2	2	15	13	4	17	0	0.6	0	0.8	0.444444	0.666667	0.590909	1	0.583333	0.533333	0.521739	1
67793697	C	T	T	T	T	T	T	1	1	1	1	1	1	17	22	12	26	3	6	0	0.8	0.526316	0.9375	0	0.555556	1	0	1	0.461538	0.461538	1
40962112	G	A	A	A	A	A	A	1	1	1	1	1	1	139	98	76	111	37	73	0.418605	0.482759	0.744186	0.541667	0.36	1	0.428571	0.521739	0.282609	0.464286	1	0.5
6165932	G	C	C	C	C	C	C	1	1	1	1	1	1	7	6	13	28	6	27	0	1	0	0	0.52	1	1	1	0	0.945946	0.28125	1
59705821	A	G	G	G	G	G	G	1	1	1	1	1	1	8	2	2	7	3	3	0	1	0	1	0	1	1	0.75	0	1	0	1
9953787	C	A	A	A	A	A	A	1	1	1	1	1	1	13	5	3	6	2	4	1	1	1	0	0	0	1	0.75	1	0	0	1
59866379	C	A	A	A	A	A	A	1	1	1	1	1	1	11	8	7	2	4	3	0	0.75	1	0	1	0	1	0	0	1	1	1
15505244	A	G	G	G	G	G	G	1	1	1	1	1	1	2	3	1	6	2	3	0	0	0.75	1	0	0	1	1	1	1	0	1
76928418	C	T	T	T	T	T	T	1	1	1	1	1	1	17	6	10	17	4	2	0	1	0.75	0.666667	1	1	0	1	0	0.333333	1	0
73737405	G	A	A	A	A	A	A	1	1	1	1	1	1	7	3	8	11	3	4	1	0	1	1	1	1	0	1	0	0	0	0.75
24992421	A	G	G	G	G	G	G	1	1	1	1	1	1	11	8	3	12	3	9	0	1	0.4	1	1	0	0.909091	0.444444	0	0	1	1
1563022	C	T	T	T	T	T	T	1	1	1	1	1	1	19	21	9	14	7	7	0.285714	0.666667	0.571429	1	1	1	0.375	0.6	0	0.6875	0.6	0
136716387	C	A	A	A	A	A	A	1	1	1	1	1	1	4	6	1	16	7	6	0	1	0	1	0	0.8	1	1	0	0	1	1
51484769	C	G	G	G	G	G	G	1	1	1	1	1	1	5	3	5	3	4	2	0	1	0.8	1	1	1	0	1	0	0	1	0
14972005	C	T	T	T	T	T	T	1	1	1	1	1	1	5	5	2	4	3	3	1	1	1	1	0	1	0	0	0	1	0	0.8
28914407	G	A	A	A	A	A	A	1	1	1	1	1	1	17	2	6	13	6	23	1	0	1	1	1	1	0	0	0.3	0	0.5	1
3359667	C	A	A	A	A	A	A	1	1	1	1	1	1	9	6	4	3	18	5	0	0	0.545455	1	0	0	1	1	1	0.666667	1	0.6
67798376	T	G	G	G	G	G	G	1	1	1	1	1	1	16	18	8	12	6	17	0	0.75	0	1	0	0.666667	1	0	1	1	0.4	1
5850892	A	G	G	G	G	G	G	1	1	1	1	1	1	4	2	5	9	3	21	0	1	1	1	1	1	0	0.833333	0	0	0.395349	0.6
23672381	G	A	A	A	A	A	A	1	1	1	1	1	1	89	51	40	29	29	54	1	1	1	0.482759	1	1	0.414286	0	0.37037	0.561905	0	0
28912781	T	C	C	C	C	C	C	1	1	1	1	1	1	10	10	15	16	11	19	0	0	1	1	1	1	0	0	1	1	0.833333	0
7153235	C	T	T	T	T	T	T	1	1	1	1	1	1	33	26	29	19	33	18	1	1	0.366667	0.966667	0.5	1	0	1	0	0	1	0
1564118	A	G	G	G	G	G	G	1	1	1	1	1	1	22	31	23	25	11	27	0.333333	0.375	1	1	1	1	0.5	0.473684	0	0.586207	0.565217	0
83299505	A	G	G	G	G	G	G	1	1	1	1	1	1	106	65	31	56	30	56	0.416667	0.5	1	0.704545	0	0.37931	0	0.638889	1	0.690909	1	0.509804
13453872	C	G	G	G	G	G	G	1	1	1	1	1	1	19	25	22	16	17	18	0	1	1	1	0	1	0.461538	0	1	0.428571	0.333333	0.625
46932295	A	G	G	G	G	G	G	1	1	1	1	1	1	3	9	11	8	5	4	0	1	1	1	0.25	0.6	0	1	1	0	1	0
10170615	T	C	C	C	C	C	C	1	1	1	1	1	1	43	33	28	30	28	107	0	1	0.428571	0.956522	0.727273	0	1	0.454545	0.833333	0.666667	0	0.785714
1563318	C	T	T	T	T	T	T	1	1	1	1	1	1	89	141	69	93	45	47	0.451923	0.391304	1	1	1	1	0.270833	0.4	0.336957	0.453488	0.54902	0
6104054	C	T	T	T	T	T	T	1	1	1	1	1	1	3	2	14	45	9	16	0	1	0	0.5	0.52381	1	1	0.833333	0	1	0	1
86683389	A	G	G	G	G	G	G	1	1	1	1	1	1	13	15	23	24	3	2	1	0	0.666667	0	0	0	0.571429	1	1	0.625	1	1
26651780	C	T	T	T	T	T	T	1	1	1	1	1	1	12	5	9	9	5	18	1	0	1	0	1	0.75	1	1	0	0.4	0	0.714286
34751067	T	C	C	C	C	C	C	1	1	1	1	1	1	30	7	12	33	24	29	0	1	1	1	1	1	0.571429	0.157895	0	0	0.636364	0.5
11141098	G	C	C	C	C	C	C	1	1	1	1	1	1	64	21	37	54	35	78	0	1	1	0	0.5	1	0.375	1	0.3	0.473684	0.448276	0.777778
104344092	A	G	G	G	G	G	G	1	1	1	1	1	1	2	9	6	21	2	13	0	0	1	0	0	1	0.875	1	0	1	1	1
8902225	G	C	C	C	C	C	C	1	1	1	1	1	1	4	7	11	8	2	2	0	0	1	1	1	1	0.875	1	0	0	1	0
6811488	T	G	G	G	G	G	G	1	1	1	1	1	1	14	7	6	12	3	34	0	0	1	0	0	1	1	1	0.25	1	0.634146	1
53675453	G	C	C	C	C	C	C	1	1	1	1	1	1	9	17	4	9	8	14	0	1	0.888889	1	0	1	1	0	0	1	0	1
7620903	C	G	G	G	G	G	G	1	1	1	1	1	1	8	6	3	4	2	2	0	0	0	0	1	0	1	1	1	0.888889	1	1
52867076	A	G	G	G	G	G	G	1	1	1	1	1	1	9	11	11	4	5	13	0	1	1	1	0	1	0.714286	1	0.75	0	0.428571	0
63562171	A	G	G	G	G	G	G	1	1	1	1	1	1	30	20	15	13	22	13	0.4	1	0.666667	0.266667	1	0	0.5625	0	0.833333	1	1	0.166667
62543225	A	G	G	G	G	G	G	1	1	1	1	1	1	5	9	4	5	4	7	0	1	1	1	0	1	0	1	1	0	0.9	0
19713571	A	C	C	C	C	C	C	1	1	1	1	1	1	2	2	9	22	6	2	0	1	1	0.5	0	1	1	0	0.4	0	1	1
5218055	A	G	G	G	G	G	G	1	1	1	1	1	1	2	2	11	17	5	4	1	1	0	0	1	0.4	1	0	1	0.5	0	1
16546235	A	C	C	C	C	C	C	1	1	1	1	1	1	24	24	6	15	8	22	1	1	0.4	1	1	1	0	0.5	0	1	0	0
23658085	G	T	T	T	T	T	T	1	1	1	1	1	1	16	20	27	11	6	2	1	1	0	0.571429	1	1	1	0	0.375	0.5	0	0.454545
8988216	A	G	G	G	G	G	G	1	1	1	1	1	1	84	65	24	53	46	16	1	1	0.317757	0.523077	0.155556	0.246154	1	1	0.368421	0.301205	0	1
7153866	T	C	C	C	C	C	C	1	1	1	1	1	1	27	9	8	28	19	31	1	1	0.25	1	0	1	0	1	0	0.666667	1	0
6104024	C	T	T	T	T	T	T	1	1	1	1	1	1	2	2	11	42	6	17	0	1	0	0.555556	0.473684	1	1	0.888889	0	1	0	1
67796973	G	A	A	A	A	A	A	1	1	1	1	1	1	15	14	15	16	5	3	0	0	1	1	0	0.5	1	0	1	0.818182	0.6	1
71418788	C	T	T	T	T	T	T	1	1	1	1	1	1	17	28	59	98	38	23	0.714286	1	0.8	0	0.576923	0	1	0	0.764706	0.666667	0.4	1
59706237	G	A	A	A	A	A	A	1	1	1	1	1	1	46	15	2	34	38	23	0	1	0.923077	1	1	1	0	0	0	1	1	0
77541321	T	C	C	C	C	C	C	1	1	1	1	1	1	8	28	7	27	6	18	1	1	1	0	0	1	0	1	0	0	0.928571	1
89083095	A	C	C	C	C	C	C	1	1	1	1	1	1	4	5	8	2	3	2	0	1	1	0	1	1	0.428571	0	1	0	1	0.5
89083101	T	C	C	C	C	C	C	1	1	1	1	1	1	4	5	8	2	3	2	0	1	1	0	1	1	0.428571	0	1	0	1	0.5
64816361	C	T	T	T	T	T	T	1	1	1	1	1	1	24	16	13	34	18	43	0	1	1	1	1	1	0	1	0	0.428571	0	0.5
42966340	A	G	G	G	G	G	G	1	1	1	1	1	1	93	94	30	45	52	59	1	0	1	1	0.3125	0	1	0.466667	1	0.151515	0	1
29139131	T	C	C	C	C	C	C	1	1	1	1	1	1	6	18	11	7	9	10	1	0	0	1	1	0	1	0.538462	0.714286	0.5	0.181818	1
5857985	C	T	T	T	T	T	T	1	1	1	1	1	1	16	10	19	32	9	33	0	1	0.5	0.8	0.517241	0.705882	0	1	0	1	0.761905	0.666667
40963185	C	G	G	G	G	G	G	1	1	1	1	1	1	45	22	11	23	18	32	0	0.636364	0.8	0.521739	0	1	1	0.583333	0.333333	0.615385	1	0.466667
13293530	C	T	T	T	T	T	T	1	1	1	1	1	1	15	31	17	34	32	35	1	1	0.3	0	0.157895	1	0	1	1	0	1	0.5
75417341	A	G	G	G	G	G	G	1	1	1	1	1	1	19	33	10	8	14	13	0.588235	1	0.333333	1	0	0.444444	0.6	1	0.285714	0.4	1	0.307692
32640625	T	A	A	A	A	A	A	1	1	1	1	1	1	5	7	9	13	7	11	1	0	0.214286	1	1	1	0.75	1	1	0	0	0
40965547	C	T	T	T	T	T	T	1	1	1	1	1	1	16	25	17	17	4	9	0.666667	0.705882	0.75	0.588235	0.875	1	0	0	0.238095	0.6	1	0.545455
8673861	A	G	G	G	G	G	G	1	1	1	1	1	1	47	50	27	20	33	28	0.521739	1	1	0.722222	1	0.5	0	0.25	0.375	1	0.272727	0.333333
11140588	C	T	T	T	T	T	T	1	1	1	1	1	1	62	31	51	126	98	191	0	1	1	0	0.371429	0.97561	0.677419	1	0.5	0.558824	0.381818	0.511111
9819595	A	G	G	G	G	G	G	1	1	1	1	1	1	14	11	15	27	10	24	0	0	1	0.5	0.4	0.363636	1	0.714286	0	1	1	1
40963509	A	G	G	G	G	G	G	1	1	1	1	1	1	45	30	24	35	18	37	0	0.454545	0.666667	0.366667	0	1	0.666667	0.625	1	0.8	1	0.4
130066831	G	A	A	A	A	A	A	1	1	1	1	1	1	222	214	67	180	84	164	0.980769	0	1	1	1	1	1	0	0	0	1	0
112649898	A	C	C	C	C	C	C	1	1	1	1	1	1	88	44	27	32	49	31	0	0	1	1	1	1	1	0.980769	0	0	0	1
110319287	C	G	G	G	G	G	G	1	1	1	1	1	1	151	60	72	97	107	141	1	1	1	1	0	0.9875	1	0	0	0	0	1
6078901	C	T	T	T	T	T	T	1	1	1	1	1	1	5	3	20	25	5	34	0	1	0.833333	0.333333	0.734694	1	0.652174	1	0	1	0.444444	0
14092994	A	G	G	G	G	G	G	1	1	1	1	1	1	3	2	8	2	6	2	1	1	1	1	0	1	0	0	0	1	0	1
58552809	C	T	T	T	T	T	T	1	1	1	1	1	1	2	3	4	7	6	2	1	1	1	1	0	1	0	0	0	1	0	1
50719346	T	C	C	C	C	C	C	1	1	1	1	1	1	2	3	5	4	13	22	1	1	1	1	0	1	0	0	0	1	0	1
110362689	T	C	C	C	C	C	C	1	1	1	1	1	1	6	9	3	2	2	3	1	1	1	1	0	1	1	0	0	0	0	1
11042504	A	G	G	G	G	G	G	1	1	1	1	1	1	4	3	3	5	8	15	0	1	1	1	0	1	1	1	0	1	0	0
91305503	A	C	C	C	C	C	C	1	1	1	1	1	1	3	13	7	2	2	7	0	1	1	1	0	1	0	1	0	1	1	0
103879074	T	G	G	G	G	G	G	1	1	1	1	1	1	8	5	3	6	3	4	0	1	1	1	0	1	1	0	1	0	1	0
103879075	T	C	C	C	C	C	C	1	1	1	1	1	1	8	5	3	6	3	4	0	1	1	1	0	1	1	0	1	0	1	0
103879077	T	G	G	G	G	G	G	1	1	1	1	1	1	8	5	3	6	3	4	0	1	1	1	0	1	1	0	1	0	1	0
5570629	A	C	C	C	C	C	C	1	1	1	1	1	1	9	2	17	23	10	18	0	1	1	1	0	1	1	1	0	0	1	0
33041166	C	T	T	T	T	T	T	1	1	1	1	1	1	9	7	5	5	7	3	1	1	1	1	0	0	1	1	0	0	1	0
46164331	N	G	G	G	G	G	G	1	1	1	1	1	1	4	14	1	5	4	3	1	1	0	1	1	0	1	1	0	1	0	0
26612520	G	A	A	A	A	A	A	1	1	1	1	1	1	2	4	2	5	6	10	0	1	1	1	0	1	0	1	0	1	1	0
26612541	G	A	A	A	A	A	A	1	1	1	1	1	1	1	4	2	5	6	12	0	1	1	1	0	1	0	1	0	1	1	0
2695804	T	C	C	C	C	C	C	1	1	1	1	1	1	11	3	4	14	5	27	1	1	0	1	0	1	1	0	0	1	1	0
38955016	G	A	A	A	A	A	A	1	1	1	1	1	1	7	20	2	5	16	2	0	1	1	1	1	0	0	1	0	1	1	0
18146425	G	C	C	C	C	C	C	1	1	1	1	1	1	4	7	3	2	18	13	0	1	1	1	1	0	1	0	0	1	1	0
18146446	G	C	C	C	C	C	C	1	1	1	1	1	1	6	8	2	2	15	13	0	1	1	1	1	0	1	0	0	1	1	0
6425039	A	T	T	T	T	T	T	1	1	1	1	1	1	23	2	7	2	15	14	0	1	1	1	0	1	0	1	0	1	1	0
6425071	A	T	T	T	T	T	T	1	1	1	1	1	1	19	4	7	2	14	14	0	1	1	1	0	1	0	1	0	1	1	0
86718841	A	G	G	G	G	G	G	1	1	1	1	1	1	2	2	6	6	3	6	0	1	1	1	1	0	0	1	1	1	0	0
69955729	T	C	C	C	C	C	C	1	1	1	1	1	1	3	2	3	9	6	4	0	1	1	1	0	1	0	1	0	1	1	0
62373202	C	T	T	T	T	T	T	1	1	1	1	1	1	5	11	12	19	5	4	1	0	1	1	0	1	1	0	1	1	0	0
62373203	T	A	A	A	A	A	A	1	1	1	1	1	1	5	10	13	19	5	4	1	0	1	1	0	1	1	0	1	1	0	0
62373204	T	A	A	A	A	A	A	1	1	1	1	1	1	5	11	13	19	5	4	1	0	1	1	0	1	1	0	1	1	0	0
76249229	T	C	C	C	C	C	C	1	1	1	1	1	1	44	17	17	38	18	13	1	0	1	1	0	1	0	1	1	0	0	1
11042597	A	T	T	T	T	T	T	1	1	1	1	1	1	5	7	4	4	8	16	0	1	1	1	0	1	0	1	0	1	0	1
43279994	T	C	C	C	C	C	C	1	1	1	1	1	1	8	2	6	2	6	11	0	1	1	1	1	0	0	1	1	0	0	1
43280001	G	T	T	T	T	T	T	1	1	1	1	1	1	8	10	6	2	6	11	0	1	1	1	1	0	0	1	1	0	0	1
21891777	A	G	G	G	G	G	G	1	1	1	1	1	1	5	13	3	4	2	9	0	1	1	1	1	0	1	0	0	0	1	1
27856206	G	A	A	A	A	A	A	1	1	1	1	1	1	11	13	8	15	14	13	1	1	1	1	0	0	1	0	0	0	1	1
75849622	T	G	G	G	G	G	G	1	1	1	1	1	1	12	11	8	8	3	21	0	1	1	1	0	1	1	0	0	0	1	1
31136134	A	G	G	G	G	G	G	1	1	1	1	1	1	6	4	6	20	8	5	1	0	1	1	0	1	1	0	1	0	0	1
35953936	A	T	T	T	T	T	T	1	1	1	1	1	1	31	7	16	39	17	28	0	1	1	1	0	1	0	0	1	1	0	1
56183550	C	T	T	T	T	T	T	1	1	1	1	1	1	51	43	10	114	30	18	1	0	1	1	0	1	0	0	1	0	1	1
1571139	A	T	T	T	T	T	T	1	1	1	1	1	1	4	14	2	5	4	10	0	1	1	1	0	1	1	0	0	0	1	1
51319199	T	G	G	G	G	G	G	1	1	1	1	1	1	9	8	6	6	4	5	0	1	1	1	0	1	1	0	0	0	1	1
54104441	G	A	A	A	A	A	A	1	1	1	1	1	1	11	9	7	7	9	38	1	0	1	1	1	0	1	0	1	0	0	1
46948932	G	T	T	T	T	T	T	1	1	1	1	1	1	3	3	3	16	2	4	0	1	1	1	0	1	0	1	0	0	1	1
89124011	A	G	G	G	G	G	G	1	1	1	1	1	1	21	19	4	9	2	3	1	1	1	0	0	1	1	0	0	1	0	1
18192538	T	G	G	G	G	G	G	1	1	1	1	1	1	2	2	2	5	6	5	1	1	1	1	0	0	0	0	0	1	1	1
18192539	T	A	A	A	A	A	A	1	1	1	1	1	1	2	2	2	4	6	5	1	1	1	1	0	0	0	0	0	1	1	1
18192540	T	C	C	C	C	C	C	1	1	1	1	1	1	2	2	2	5	9	5	1	1	1	1	0	0	0	0	0	1	1	1
39120324	G	T	T	T	T	T	T	1	1	1	1	1	1	8	3	2	4	4	6	0	1	1	1	0	1	1	0	0	1	0	1
711823	A	T	T	T	T	T	T	1	1	1	1	1	1	9	6	7	6	13	10	0	1	1	1	1	0	0	0	0	1	1	1
117320739	G	C	C	C	C	C	C	1	1	1	1	1	1	3	3	4	6	7	10	0	1	1	1	1	0	0	0	0	1	1	1
117320774	T	C	C	C	C	C	C	1	1	1	1	1	1	3	2	4	5	6	9	0	1	1	1	1	0	0	0	0	1	1	1
10866897	A	G	G	G	G	G	G	1	1	1	1	1	1	14	19	6	7	6	21	0	1	1	1	1	0	1	0	0	0	1	1
108157613	G	T	T	T	T	T	T	1	1	1	1	1	1	9	12	2	2	6	15	0	1	1	1	0	1	0	0	1	0	1	1
82545760	A	G	G	G	G	G	G	1	1	1	1	1	1	6	2	9	7	13	7	0	1	1	1	0	1	0	0	0	1	1	1
63303668	T	C	C	C	C	C	C	1	1	1	1	1	1	20	17	10	19	5	19	1	0	1	1	0	1	0	0	1	0	1	1
63303669	G	A	A	A	A	A	A	1	1	1	1	1	1	20	17	9	19	5	20	1	0	1	1	0	1	0	0	1	0	1	1
63304018	A	C	C	C	C	C	C	1	1	1	1	1	1	2	4	3	5	7	3	1	1	1	0	0	1	1	0	0	1	0	1
72503906	A	G	G	G	G	G	G	1	1	1	1	1	1	15	9	2	19	6	12	0	1	1	1	1	0	0	0	0	1	1	1
39701435	A	G	G	G	G	G	G	1	1	1	1	1	1	17	11	17	10	7	9	0	1	1	1	0	1	1	0	0	0	1	1
41508611	C	T	T	T	T	T	T	1	1	1	1	1	1	16	4	4	6	3	6	0	1	1	1	0	1	0	1	0	1	0	1
63753768	G	C	C	C	C	C	C	1	1	1	1	1	1	5	6	2	5	2	3	0	1	1	1	1	0	1	0	0	1	0	1
2506307	A	G	G	G	G	G	G	1	1	1	1	1	1	8	3	6	8	6	4	0	1	1	1	0	1	0	1	1	0	0	1
26388861	T	C	C	C	C	C	C	1	1	1	1	1	1	2	4	5	4	6	4	0	0	1	1	0	1	1	0	1	1	1	0
33180788	G	A	A	A	A	A	A	1	1	1	1	1	1	4	4	9	3	8	36	0	1	0	1	0	1	0.666667	1	1	1	0.333333	0
1939632	T	C	C	C	C	C	C	1	1	1	1	1	1	5	2	2	5	2	2	0	1	1	1	0	0	1	1	0	1	1	0
121289023	T	C	C	C	C	C	C	1	1	1	1	1	1	5	7	3	4	4	3	0	1	1	1	0	0	0	1	1	1	1	0
34244518	T	C	C	C	C	C	C	1	1	1	1	1	1	3	2	4	5	2	3	0	1	1	1	0	0	1	0	1	1	1	0
72592340	C	G	G	G	G	G	G	1	1	1	1	1	1	7	7	7	13	3	6	0	1	0	1	1	0	1	1	0	1	1	0
23409701	T	C	C	C	C	C	C	1	1	1	1	1	1	12	8	2	7	8	4	0	0	1	1	1	0	1	1	0	1	1	0
4005571	A	G	G	G	G	G	G	1	1	1	1	1	1	3	3	2	5	5	2	0	0	1	1	0	1	1	1	0	1	1	0
30738090	G	T	T	T	T	T	T	1	1	1	1	1	1	8	10	15	4	9	8	0	1	1	0	0	1	1	0	1	0	1	1
1673677	N	G	G	G	G	G	G	1	1	1	1	1	1	6	3	2	3	4	4	0	0	1	1	0	1	1	1	0	0	1	1
1673679	N	A	A	A	A	A	A	1	1	1	1	1	1	5	3	2	3	3	4	0	0	1	1	0	1	1	1	0	0	1	1
1673680	N	G	G	G	G	G	G	1	1	1	1	1	1	5	3	2	3	4	4	0	0	1	1	0	1	1	1	0	0	1	1
1673681	N	C	C	C	C	C	C	1	1	1	1	1	1	5	3	2	3	4	4	0	0	1	1	0	1	1	1	0	0	1	1
1673682	N	C	C	C	C	C	C	1	1	1	1	1	1	5	3	2	3	3	3	0	0	1	1	0	1	1	1	0	0	1	1
2357669	G	A	A	A	A	A	A	1	1	1	1	1	1	4	5	3	4	2	8	0	1	1	1	0	0	0	1	0	1	1	1
31840814	C	G	G	G	G	G	G	1	1	1	1	1	1	10	7	7	10	4	1	0	0	1	1	0	1	0	1	1	0	1	1
59100756	G	C	C	C	C	C	C	1	1	1	1	1	1	8	6	6	7	4	7	0	1	1	1	0	0	1	1	0	1	0	1
79415355	A	G	G	G	G	G	G	1	1	1	1	1	1	11	5	5	10	13	8	1	0	1	0	0	1	1	1	0	1	0	1
9661206	T	C	C	C	C	C	C	1	1	1	1	1	1	2	3	3	24	4	7	0	0	1	1	1	0	0	1	0	1	1	1
9661208	C	G	G	G	G	G	G	1	1	1	1	1	1	2	3	2	23	4	6	0	0	1	1	1	0	0	1	0	1	1	1
9661248	G	A	A	A	A	A	A	1	1	1	1	1	1	2	3	3	13	4	3	0	0	1	1	1	0	0	1	0	1	1	1
9661271	T	C	C	C	C	C	C	1	1	1	1	1	1	2	2	2	10	4	3	0	0	1	1	1	0	0	1	0	1	1	1
55922394	C	T	T	T	T	T	T	1	1	1	1	1	1	7	7	3	12	3	6	0	1	0	1	1	0	1	1	0	1	0	1
55922399	C	A	A	A	A	A	A	1	1	1	1	1	1	7	5	3	12	3	6	0	1	0	1	1	0	1	1	0	1	0	1
55922406	G	A	A	A	A	A	A	1	1	1	1	1	1	6	5	3	13	3	7	0	1	0	1	1	0	1	1	0	1	0	1
66614309	T	C	C	C	C	C	C	1	1	1	1	1	1	2	5	6	2	7	5	1	0	1	0	1	0	1	1	0	0	1	1
6003764	A	T	T	T	T	T	T	1	1	1	1	1	1	18	11	28	40	10	31	0	1	0	1	1	0	0	1	0	1	1	1
6003767	G	T	T	T	T	T	T	1	1	1	1	1	1	16	11	25	30	9	30	0	1	0	1	1	0	0	1	0	1	1	1
9514126	A	G	G	G	G	G	G	1	1	1	1	1	1	2	5	7	5	4	4	0	0	1	1	1	0	0	1	0	1	1	1
750145	A	G	G	G	G	G	G	1	1	1	1	1	1	3	5	6	10	4	5	0	1	1	1	0	0	1	0	0	1	1	1
28834934	T	C	C	C	C	C	C	1	1	1	1	1	1	49	3	6	25	10	11	0	0	1	1	1	0	1	0	0	1	1	1
6551945	A	G	G	G	G	G	G	1	1	1	1	1	1	8	5	2	19	7	2	0	1	0	1	1	0	0	1	0	1	1	1
4754596	A	G	G	G	G	G	G	1	1	1	1	1	1	7	3	2	6	11	12	0	0	1	1	0	1	0	1	0	1	1	1
63652035	T	C	C	C	C	C	C	1	1	1	1	1	1	4	7	5	6	10	2	0	0	1	1	0	1	1	1	0	1	0	1
143642179	C	T	T	T	T	T	T	1	1	1	1	1	1	3	4	4	9	10	2	1	1	0	0	0	1	1	0	0	1	1	1
52763527	A	G	G	G	G	G	G	1	1	1	1	1	1	13	14	3	9	6	4	0	0	1	1	0	1	1	0	0	1	1	1
24662988	A	G	G	G	G	G	G	1	1	1	1	1	1	2	3	3	4	2	4	0	0	1	1	1	0	0	1	1	0	1	1
24662989	A	G	G	G	G	G	G	1	1	1	1	1	1	1	3	3	6	1	4	0	0	1	1	1	0	0	1	1	0	1	1
21272511	A	G	G	G	G	G	G	1	1	1	1	1	1	12	5	3	3	6	11	0	1	0	1	1	0	1	1	0	1	0	1
2492197	G	A	A	A	A	A	A	1	1	1	1	1	1	5	6	5	4	5	9	0	1	1	1	0	0	1	1	0	0	1	1
8955989	G	A	A	A	A	A	A	1	1	1	1	1	1	4	2	9	10	4	2	1	0	0	1	1	0	1	1	1	0	0	1
43647033	A	C	C	C	C	C	C	1	1	1	1	1	1	2	5	3	13	2	3	1	0	1	1	0	0	0	1	0	1	1	1
48370844	A	T	T	T	T	T	T	1	1	1	1	1	1	5	8	6	18	4	21	1	0	1	1	0	0	1	1	1	0	0	1
19446513	T	C	C	C	C	C	C	1	1	1	1	1	1	4	5	2	2	5	6	0	1	1	0	0	1	0	1	1	1	0	1
19446579	A	G	G	G	G	G	G	1	1	1	1	1	1	3	4	4	2	4	9	0	1	1	0	0	1	0	0	1	1	1	1
99696482	T	G	G	G	G	G	G	1	1	1	1	1	1	7	6	5	11	6	9	0	0	1	1	1	0	1	1	0	1	0	1
11856587	G	A	A	A	A	A	A	1	1	1	1	1	1	25	3	3	3	3	12	1	0	1	0	0	1	1	1	0	1	0	1
51345776	G	A	A	A	A	A	A	1	1	1	1	1	1	16	6	10	22	18	14	0	1	1	0	0	1	1	0	0	1	1	1
52816951	A	C	C	C	C	C	C	1	1	1	1	1	1	5	9	4	6	12	7	1	0	1	1	0	0	1	1	1	0	0	1
94118879	C	T	T	T	T	T	T	1	1	1	1	1	1	5	2	7	3	3	2	0	0	1	1	0	1	1	1	0	0	1	1
110676384	G	A	A	A	A	A	A	1	1	1	1	1	1	9	6	2	14	4	25	0	1	1	0	1	0	0	0	1	1	1	1
31462914	C	T	T	T	T	T	T	1	1	1	1	1	1	7	4	11	17	6	13	0	0	1	1	0	1	1	0	0	1	1	1
35814180	A	G	G	G	G	G	G	1	1	1	1	1	1	11	6	2	8	9	7	0	1	1	1	0	0	0	1	0	1	1	1
45271751	T	C	C	C	C	C	C	1	1	1	1	1	1	18	12	2	6	12	5	0	1	1	1	0	0	0	1	0	1	1	1
23410012	C	G	G	G	G	G	G	1	1	1	1	1	1	8	4	4	3	3	4	0	1	1	1	0	0	0	1	0	1	1	1
23410039	C	G	G	G	G	G	G	1	1	1	1	1	1	8	4	4	4	3	4	0	1	1	1	0	0	0	1	0	1	1	1
23410044	A	G	G	G	G	G	G	1	1	1	1	1	1	8	4	3	4	3	4	0	1	1	1	0	0	0	1	0	1	1	1
23410048	A	G	G	G	G	G	G	1	1	1	1	1	1	8	4	4	4	3	4	0	1	1	1	0	0	0	1	0	1	1	1
23410050	A	G	G	G	G	G	G	1	1	1	1	1	1	9	4	4	4	3	4	0	1	1	1	0	0	0	1	0	1	1	1
23410807	A	G	G	G	G	G	G	1	1	1	1	1	1	5	4	9	15	3	6	0	1	1	1	0	0	0	1	0	1	1	1
80054117	T	C	C	C	C	C	C	1	1	1	1	1	1	5	13	4	22	5	10	0	0	1	1	0	1	0	1	0	1	1	1
50577208	A	G	G	G	G	G	G	1	1	1	1	1	1	3	5	3	2	2	8	0	1	1	1	0	0	1	1	0	0	1	1
130302507	A	C	C	C	C	C	C	1	1	1	1	1	1	19	8	11	15	6	7	0	1	1	0	1	0	1	0	0	1	1	1
58240897	N	C	C	C	C	C	C	1	1	1	1	1	1	24	26	21	20	11	5	0	1	0	1	0	0	1	1	1	1	1	0
136691548	C	G	G	G	G	G	G	1	1	1	1	1	1	6	3	13	15	9	4	0	1	0	1	0	0	1	1	1	1	1	0
60352139	C	T	T	T	T	T	T	1	1	1	1	1	1	3	2	8	5	6	4	0	1	1	0	0	0	1	1	1	1	1	0
60352228	G	A	A	A	A	A	A	1	1	1	1	1	1	3	2	7	5	6	3	0	1	1	0	0	0	1	1	1	1	1	0
60352232	C	T	T	T	T	T	T	1	1	1	1	1	1	3	2	7	5	6	3	0	1	1	0	0	0	1	1	1	1	1	0
91304965	A	G	G	G	G	G	G	1	1	1	1	1	1	3	15	17	18	10	4	0	0	1	0	1	0	1	1	1	1	0	1
18911501	A	G	G	G	G	G	G	1	1	1	1	1	1	5	5	6	8	2	5	0	0	1	1	0	0	0	1	1	1	1	1
36759392	C	T	T	T	T	T	T	1	1	1	1	1	1	9	7	9	11	14	10	1	0	0	0	0	1	0	1	1	1	1	1
54227487	G	C	C	C	C	C	C	1	1	1	1	1	1	5	6	6	3	2	7	0	0	1	0	1	0	1	1	1	0	1	1
24744382	A	G	G	G	G	G	G	1	1	1	1	1	1	6	3	8	8	2	4	0	0	1	1	0	0	1	1	1	1	0	1
21513540	G	C	C	C	C	C	C	1	1	1	1	1	1	19	5	3	2	2	4	0	0	0	1	1	0	1	1	0	1	1	1
55910284	T	C	C	C	C	C	C	1	1	1	1	1	1	7	3	2	7	5	3	0	0	0	1	0	1	1	1	0	1	1	1
43526718	C	G	G	G	G	G	G	1	1	1	1	1	1	14	4	4	2	4	2	0	0	1	1	0	0	1	0	1	1	1	1
43572432	C	T	T	T	T	T	T	1	1	1	1	1	1	3	2	3	2	3	4	0	0	0	1	1	0	1	1	0	1	1	1
43572451	C	T	T	T	T	T	T	1	1	1	1	1	1	3	4	5	3	3	4	0	0	0	1	1	0	1	1	0	1	1	1
42569639	T	C	C	C	C	C	C	1	1	1	1	1	1	12	15	4	15	2	13	1	1	0	0	0	0	0	1	1	1	1	1
7769110	A	G	G	G	G	G	G	1	1	1	1	1	1	10	5	5	14	6	8	0	1	0	1	0	0	0	1	1	1	1	1
48147280	A	G	G	G	G	G	G	1	1	1	1	1	1	24	4	8	28	11	28	0	0	1	0	0	1	1	1	0	1	1	1
1649270	T	C	C	C	C	C	C	1	1	1	1	1	1	3	6	6	11	5	6	1	0	0	1	0	0	1	0	1	1	1	1
1649333	T	C	C	C	C	C	C	1	1	1	1	1	1	2	3	2	5	4	6	0	0	1	1	0	0	1	0	1	1	1	1
9286543	N	T	T	T	T	T	T	1	1	1	1	1	1	4	3	5	11	2	5	0	0	1	1	0	0	1	1	1	0	1	1
28972341	A	G	G	G	G	G	G	1	1	1	1	1	1	4	10	3	2	2	14	0	0	0	1	1	0	1	1	0	1	1	1
19446557	T	C	C	C	C	C	C	1	1	1	1	1	1	3	4	5	2	5	7	0	0	1	0	0	1	0	1	1	1	1	1
78163721	C	T	T	T	T	T	T	1	1	1	1	1	1	4	4	1	2	3	6	0	0	0	1	0	1	1	0	1	1	1	1
117154512	A	G	G	G	G	G	G	1	1	1	1	1	1	2	2	4	3	25	10	0	0	1	1	0	0	1	1	0	1	1	1
104066293	G	A	A	A	A	A	A	1	1	1	1	1	1	2	2	7	9	3	6	0	0	1	1	0	0	0	1	1	1	1	1
104066297	T	C	C	C	C	C	C	1	1	1	1	1	1	2	2	5	8	2	6	0	0	1	1	0	0	0	1	1	1	1	1
104066316	A	G	G	G	G	G	G	1	1	1	1	1	1	2	2	2	9	3	5	0	0	1	1	0	0	0	1	1	1	1	1
104066317	T	C	C	C	C	C	C	1	1	1	1	1	1	2	2	3	9	3	5	0	0	1	1	0	0	0	1	1	1	1	1
105018012	A	T	T	T	T	T	T	1	1	1	1	1	1	21	6	8	16	2	3	0	0	0	1	1	0	1	1	0	1	1	1
9376754	T	C	C	C	C	C	C	1	1	1	1	1	1	7	6	6	5	3	8	0	1	0	1	0	0	1	1	0	1	1	1
57148612	T	C	C	C	C	C	G	1	1	1	1	1	1	19	8	4	5	12	2	1	0	0.333333	0	0	0	0.666667	1	1	1	1	1
57148612	T	C	C	C	C	C	G	1	1	1	1	1	1	19	8	4	5	12	2	1	0	0.333333	0	0	0	0.666667	1	1	1	1	1
35458064	T	G	G	G	G	G	G	1	1	1	1	1	1	5	4	7	17	2	2	0	0	1	0	0	0	1	1	1	1	1	1
18834839	T	C	C	C	C	C	C	1	1	1	1	1	1	7	2	5	5	3	2	0	1	1	1	1	1	0	1	0	1	0	0
48825890	C	T	T	T	T	T	T	1	1	1	1	1	1	3	12	3	9	5	7	0	0	1	1	1	1	1	1	0	1	0	0
48825893	T	C	C	C	C	C	C	1	1	1	1	1	1	3	12	3	9	4	7	0	0	1	1	1	1	1	1	0	1	0	0
59101919	T	C	C	C	C	C	C	1	1	1	1	1	1	12	17	3	6	7	9	1	0	1	1	1	1	0	0	0	1	1	0
5911136	A	G	G	G	G	G	G	1	1	1	1	1	1	1	4	9	23	4	12	0	1	1	1	1	1	0	1	0	0	1	0
5911137	C	G	G	G	G	G	G	1	1	1	1	1	1	2	5	10	25	4	13	0	1	1	1	1	1	0	1	0	0	1	0
59706222	T	C	C	C	C	C	C	1	1	1	1	1	1	68	21	3	30	28	21	0	1	1	1	1	1	0	0	0	1	1	0
23408808	A	G	G	G	G	G	G	1	1	1	1	1	1	14	10	9	26	6	18	0	0	1	1	1	1	0	0	1	1	1	0
1564660	T	C	C	C	C	C	C	1	1	1	1	1	1	4	12	6	7	4	3	0	0	1	1	1	1	1	1	1	0	0	0
116970935	C	T	T	T	T	T	T	1	1	1	1	1	1	2	4	5	2	2	2	1	0	1	0	1	1	0	0	1	1	1	0
64356000	T	G	G	G	G	G	G	1	1	1	1	1	1	14	7	8	2	10	6	1	0	0	1	1	1	1	1	0	0	1	0
2695963	T	C	C	C	C	C	C	1	1	1	1	1	1	5	6	6	14	12	19	0	0	1	1	1	1	1	0	0	1	1	0
2695964	G	A	A	A	A	A	A	1	1	1	1	1	1	5	5	6	14	10	19	0	0	1	1	1	1	1	0	0	1	1	0
2695967	A	G	G	G	G	G	G	1	1	1	1	1	1	5	6	6	13	12	21	0	0	1	1	1	1	1	0	0	1	1	0
37674079	C	A	A	A	A	A	A	1	1	1	1	1	1	12	4	4	5	6	4	0	1	1	1	1	1	0	0	1	0	1	0
37674108	T	A	A	A	A	A	A	1	1	1	1	1	1	13	2	4	5	4	4	0	1	1	1	1	1	0	0	1	0	1	0
13771831	A	G	G	G	G	G	G	1	1	1	1	1	1	6	4	2	5	4	13	0	0	1	0	1	1	0	1	1	1	1	0
19141350	T	C	C	C	C	C	C	1	1	1	1	1	1	6	2	5	4	4	9	0	1	1	1	1	1	1	1	0	0	0	0
37282441	G	C	C	C	C	C	C	1	1	1	1	1	1	9	4	3	8	4	9	1	0	1	0	1	1	1	1	0	1	0	0
61790216	C	T	T	T	T	T	T	1	1	1	1	1	1	7	16	10	2	5	8	1	1	1	0	1	1	1	0	0	0	1	0
126559087	A	G	G	G	G	G	G	1	1	1	1	1	1	12	15	7	6	17	10	1	1	1	0	1	1	0	1	0	0	1	0
8848419	T	C	C	C	C	C	C	1	1	1	1	1	1	18	8	4	25	2	7	0	1	1	1	1	1	0	0	0	1	1	0
8848991	G	T	T	T	T	T	T	1	1	1	1	1	1	27	5	3	14	4	4	0	1	1	0	1	1	0	1	0	1	1	0
13887458	A	G	G	G	G	G	G	1	1	1	1	1	1	8	2	3	7	3	6	0	1	0	1	1	1	1	0	1	1	0	0
70871912	A	C	C	C	C	C	C	1	1	1	1	1	1	16	22	10	25	5	26	1	0	1	1	1	1	1	0	0	0	0	1
91305324	T	C	C	C	C	C	C	1	1	1	1	1	1	14	14	5	5	2	9	0	1	1	0	1	1	0	1	0	0	1	1
2410702	C	A	A	A	A	A	A	1	1	1	1	1	1	2	3	2	9	3	3	0	0	1	0	1	1	0	1	0	1	1	1
9661347	T	G	G	G	G	G	G	1	1	1	1	1	1	5	6	4	6	6	6	0	1	1	1	1	1	1	0	0	0	0	1
43124762	G	C	C	C	C	C	C	1	1	1	1	1	1	6	2	2	8	2	4	1	0	1	0	1	1	1	1	0	0	0	1
15198596	G	A	A	A	A	A	A	1	1	1	1	1	1	10	8	3	5	3	21	0	0	0	1	1	1	0	0	1	1	1	1
40580679	A	G	G	G	G	G	G	1	1	1	1	1	1	7	2	8	11	5	5	0	1	1	0	1	1	0	0	0	1	1	1
40580697	A	G	G	G	G	G	G	1	1	1	1	1	1	6	2	7	11	6	7	0	1	1	0	1	1	0	0	0	1	1	1
127806219	C	T	T	T	T	T	T	1	1	1	1	1	1	7	6	2	5	4	6	0	1	0	1	1	1	0	1	0	0	1	1
127806245	T	A	A	A	A	A	A	1	1	1	1	1	1	9	6	3	5	3	6	0	1	0	1	1	1	0	1	0	0	1	1
127806246	G	T	T	T	T	T	T	1	1	1	1	1	1	9	6	3	5	3	6	0	1	0	1	1	1	0	1	0	0	1	1
28245571	C	T	T	T	T	T	T	1	1	1	1	1	1	17	4	2	14	2	6	0	0.5	0.666667	0	1	0.833333	0	1	0	1	1	1
29490668	A	G	G	G	G	G	G	1	1	1	1	1	1	11	16	2	5	10	22	0	1	1	0	1	1	1	0	0	0	1	1
1554857	A	G	G	G	G	G	G	1	1	1	1	1	1	2	10	2	11	14	17	0	0	0	1	1	1	0	1	0	1	1	1
40019125	C	T	T	T	T	T	T	1	1	1	1	1	1	3	3	4	6	7	6	1	0	1	1	1	1	1	0	0	0	0	1
58552572	G	T	T	T	T	T	T	1	1	1	1	1	1	11	8	7	11	6	6	0	0	1	1	1	1	1	0	0	0	1	1
59143229	A	G	G	G	G	G	G	1	1	1	1	1	1	3	2	4	16	8	5	0	1	1	1	1	1	0	0	0	0	1	1
65131609	G	A	A	A	A	A	A	1	1	1	1	1	1	9	5	20	9	3	11	1	0	1	0	1	1	1	0	1	0	0	1
33953845	G	A	A	A	A	A	A	1	1	1	1	1	1	7	4	2	6	3	2	0	0	1	1	1	1	0	1	0	0	1	1
52163683	C	T	T	T	T	T	T	1	1	1	1	1	1	12	15	3	18	12	15	0	0	1	0	1	1	1	0	0	1	1	1
103370534	A	G	G	G	G	G	G	1	1	1	1	1	1	12	7	5	9	7	6	1	0	0	1	1	1	1	0	0	0	1	1
29604022	N	T	T	T	T	T	T	1	1	1	1	1	1	11	11	14	9	7	27	0	0	1	1	1	1	1	1	0	0	0	1
53983659	T	C	C	C	C	C	C	1	1	1	1	1	1	17	6	7	22	8	11	0	1	1	1	1	1	1	0	0	0	0	1
35101002	C	A	A	A	A	A	A	1	1	1	1	1	1	4	2	9	7	3	4	1	1	0	1	1	1	0	1	0	0	0	1
37740530	A	G	G	G	G	G	G	1	1	1	1	1	1	59	25	24	21	3	22	0	0	1	1	1	1	0	0	1	1	0	1
11089191	T	G	G	G	G	G	G	1	1	1	1	1	1	12	15	9	17	5	31	0.5	1	1	0.615385	0	1	0	0	0	1	1	0.9
76919031	A	G	G	G	G	G	G	1	1	1	1	1	1	3	13	6	22	5	7	0	0	0.571429	0.8	0	1	1	1	1	0.75	0.375	0.52
65767100	C	T	T	T	T	T	T	1	1	1	1	1	1	106	40	74	131	65	111	1	0.5625	1	1	1	1	1	0	0	0	0	0.461538
27693936	T	C	C	C	C	C	C	1	1	1	1	1	1	17	12	15	19	28	42	0	0.428571	1	1	1	0	1	0	0	0.6	1	1
11141061	A	G	G	G	G	G	G	1	1	1	1	1	1	89	26	48	65	47	100	0	1	1	0	0.490196	0.980392	0.382353	1	0.72	0.522727	0.365079	0.575758
65766941	A	G	G	G	G	G	G	1	1	1	1	1	1	123	39	41	128	61	63	1	0.551724	1	1	1	1	1	0	0	0	0	0.486486
1563609	C	T	T	T	T	T	T	1	1	1	1	1	1	63	76	57	103	50	47	0.392157	0.408163	1	1	1	1	0.407767	0.422222	0.277778	0.34375	0.788462	0
52418497	C	T	T	T	T	T	T	1	1	1	1	1	1	17	12	13	6	2	9	0	0	0.333333	0.75	0.444444	1	1	0.25	1	0.266667	1	1
32826421	T	C	C	C	C	C	C	1	1	1	1	1	1	16	12	4	19	17	7	0	1	1	1	1	1	0.4375	0.4375	0	0.8	0.375	0
20291150	C	G	G	G	G	G	G	1	1	1	1	1	1	3	5	5	6	2	3	1	0	0	1	1	1	0	1	0.75	0	1	0.3
25542525	A	G	G	G	G	G	G	1	1	1	1	1	1	28	13	30	26	14	47	1	1	0.428571	1	0.666667	0.333333	0	0	0.375	0.25	1	1
27331320	G	A	A	A	A	A	A	1	1	1	1	1	1	2	2	4	3	2	7	0.5	1	1	1	1	0	0.555556	1	1	0	0	0
83299280	A	G	G	G	G	G	G	1	1	1	1	1	1	42	82	43	82	16	61	0.882353	0.538462	1	0.46875	0	0.666667	0	0.5	0.882353	0.574074	1	0.54717
40962428	C	T	T	T	T	T	T	1	1	1	1	1	1	105	91	28	90	49	83	0.75	0.636364	0.40625	0.577465	0.75	1	0.555556	0.4375	0	0.527778	1	0.42029
10684570	G	A	A	A	A	A	A	1	1	1	1	1	1	17	18	8	9	6	27	0	1	1	1	1	1	0	0	0.230769	1	0.833333	0
1562988	C	T	T	T	T	T	T	1	1	1	1	1	1	17	14	3	12	8	5	0.666667	0.75	0.833333	1	1	1	0	0.571429	0	0.642857	0.6	0
67640047	T	G	G	G	G	G	G	1	1	1	1	1	1	13	24	11	24	15	6	1	1	1	1	1	0	1	0	0	0	0.6875	0.388889
40962492	C	T	T	T	T	T	T	1	1	1	1	1	1	86	76	29	88	59	80	0.444444	0.346154	0.444444	0.555556	0.777778	1	0.5	0.583333	0.62963	0.384615	0.970588	0.450704
14788346	A	C	C	C	C	C	C	1	1	1	1	1	1	9	10	4	13	11	11	0.714286	1	1	1	0	0.5	0.384615	0.5	0	1	0	1
99063425	T	G	G	G	G	G	G	1	1	1	1	1	1	6	2	3	15	12	4	0	1	1	1	0	1	1	0.6	0	0.5	0	1
19713572	A	C	C	C	C	C	C	1	1	1	1	1	1	2	2	7	25	5	2	0	1	1	0.5	0	1	1	0.2	0.4	0	1	1
37801921	A	C	C	C	C	C	C	1	1	1	1	1	1	10	5	2	6	10	4	1	0.5	1	1	1	1	0	0	1	0	0	0.6
26651802	T	G	G	G	G	G	G	1	1	1	1	1	1	13	3	3	3	4	17	1	0	1	0	1	1	1	1	0	0.6	0	0.5
113679190	T	C	C	C	C	C	C	1	1	1	1	1	1	15	35	11	22	19	5	0	1	1	1	1	1	0	0.272727	0	1	0.272727	0.555556
9819371	A	G	G	G	G	G	G	1	1	1	1	1	1	10	24	11	25	19	15	0.571429	0	1	0.636364	0	0.4	1	0.5	0	1	1	1
40849153	C	T	T	T	T	T	T	1	1	1	1	1	1	11	26	43	52	25	53	0.714286	0.555556	0	1	0.588235	0.466667	0.478261	1	0.592105	0.296296	0.428571	1
84535535	C	A	A	A	A	A	A	1	1	1	1	1	1	12	13	4	13	15	21	1	0	0	0	1	1	0.625	1	0	1	0.5	1
11140782	C	G	G	G	G	G	G	1	1	1	1	1	1	90	23	41	72	73	179	0	1	1	0	0.69697	1	0.7	1	0.227273	0.471698	0.5	0.529412
7153344	C	T	T	T	T	T	T	1	1	1	1	1	1	31	26	19	39	57	52	1	1	0.583333	0.96875	0.578947	1	0	1	0	0	1	0
54456978	T	C	C	C	C	C	C	1	1	1	1	1	1	18	21	8	37	21	33	0.590909	1	0	0.380952	1	0.5	0.785714	0.533333	0.214286	0.48	0.65	1
39739149	T	C	C	C	C	C	C	1	1	1	1	1	1	48	18	3	9	5	21	0	1	0.923077	1	1	1	0.555556	0	0	0	0.666667	1
56817827	A	G	G	G	G	G	G	1	1	1	1	1	1	48	49	8	19	24	10	1	1	0.625	0	1	0.28	1	0	0	1	1	0.25
48292019	A	T	T	T	T	T	T	1	1	1	1	1	1	45	18	3	13	30	26	1	0.2	1	0.434783	0.965517	1	0.3125	0.347826	1	0.3125	0.272727	0.3125
71373535	A	G	G	G	G	G	G	1	1	1	1	1	1	53	51	18	40	25	42	1	1	1	1	1	0.7	0	0.47619	0.333333	0.653846	0	0
77907866	T	G	G	G	G	G	G	1	1	1	1	1	1	19	10	14	9	4	23	1	1	1	1	0	0.5	1	0.666667	0	0	0	1
67797008	T	A	A	A	A	A	A	1	1	1	1	1	1	8	25	13	16	6	5	0	0	1	1	0	0.5	1	0	1	0.666667	1	1
1313937	C	A	A	A	A	A	A	1	1	1	1	1	1	24	8	7	6	4	7	0	0	1	1	1	1	0.5	0.5	1	0.666667	0.5	0
5414438	T	C	C	C	C	C	C	1	1	1	1	1	1	9	5	6	9	3	2	1	0	1	0.333333	0.583333	1	1	0	0.545455	0.444444	1	0.26087
83285936	G	A	A	A	A	A	A	1	1	1	1	1	1	7	7	11	10	8	11	1	1	1	0	0	1	0	0.3	0.961538	0.692308	1	0.214286
104275739	T	C	C	C	C	C	C	1	1	1	1	1	1	31	23	23	53	16	19	0.4	1	0.714286	0.5	1	1	0	0	0	0.555556	1	1
6970912	C	G	G	G	G	G	G	1	1	1	1	1	1	201	128	148	230	131	335	1	1	1	1	0.5	0	0	0.45283	1	0.36	0.380282	0.484848
7475473	G	C	C	C	C	C	C	1	1	1	1	1	1	7	5	8	2	7	4	0	1	0.625	1	0.666667	0.666667	1	1	0	0	0.222222	1
5864750	A	G	G	G	G	G	G	1	1	1	1	1	1	4	11	7	15	4	27	0	0	1	1	1	1	0	0.5	1	0.4	0.679245	0.612903
26312729	G	C	C	C	C	C	C	1	1	1	1	1	1	31	26	7	15	10	7	0	0.8	1	1	0	1	0.545455	1	0	0.347826	1	0.5
65814754	A	G	G	G	G	G	G	1	1	1	1	1	1	74	81	57	55	45	81	0.984848	0.363636	1	1	1	1	1	0	0	0	0.472222	0.375
21151962	G	T	T	T	T	T	T	1	1	1	1	1	1	5	11	2	5	3	3	0.666667	1	0	1	1	0	1	0	0	0.666667	0.875	1
62548470	G	A	A	A	A	A	A	1	1	1	1	1	1	19	13	17	52	14	24	1	0.363636	0.5	0.846154	1	1	1	0.5	0	1	0	0
71954403	A	G	G	G	G	G	G	1	1	1	1	1	1	47	37	22	64	42	44	1	1	0.333333	1	1	1	0	1	0.425	0	0	0.457627
67796921	A	C	C	C	C	C	C	1	1	1	1	1	1	12	12	20	22	2	9	0	0.8	0.7	1	0	0.6	1	0	1	0.619048	0.5	1
16346803	C	G	G	G	G	G	G	1	1	1	1	1	1	24	16	18	25	22	14	1	1	1	1	1	1	0	0	0.564103	0.333333	0.322581	0
11139706	G	A	A	A	A	A	A	1	1	1	1	1	1	139	76	90	129	144	120	0	0.98773	0.982036	0	0.52907	1	0.525773	1	0.572519	0.5	0.52356	0.604167
9148185	T	C	C	C	C	C	C	1	1	1	1	1	1	52	9	26	41	29	8	1	1	1	1	0.5	0	0.75	1	0.583333	0.4	0	0
40962318	T	C	C	C	C	C	C	1	1	1	1	1	1	95	63	33	92	52	60	0.545455	0.62963	0.611111	0.568966	0.75	1	0.25	0.52381	0.5	0.347826	1	0.508475
34977468	T	C	C	C	C	C	C	1	1	1	1	1	1	25	15	3	9	15	15	0.375	1	1	0.4	1	1	0.294118	0	0.666667	0.5	0	1
78639426	A	G	G	G	G	G	G	1	1	1	1	1	1	27	20	6	24	11	11	1	0.428571	0	1	0.222222	1	0.285714	1	0	0.6	1	0.7
11139235	G	A	A	A	A	A	A	1	1	1	1	1	1	297	132	239	354	296	343	0	1	0.931818	0	0.478261	0.984375	0.5625	1	0.672897	0.4	0.602564	0.6125
11140391	A	G	G	G	G	G	G	1	1	1	1	1	1	69	50	34	99	121	201	0	0.980392	1	0	0.545455	1	0.583333	1	0.4	0.521739	0.629032	0.587302
31844827	T	G	G	G	G	G	G	1	1	1	1	1	1	11	5	10	16	4	17	0.833333	1	0.5	0	0	0.583333	0.4	1	0.933333	0	1	1
104058654	C	G	G	G	G	G	G	1	1	1	1	1	1	40	33	15	31	37	8	0	1	1	1	0	1	0	0.25	0	1	1	1
10811646	C	A	A	A	A	A	A	1	1	1	1	1	1	64	21	13	30	12	25	1	1	1	1	1	1	0.307692	0	0	0.55814	0	0.391304
33301487	A	C	C	C	C	C	C	1	1	1	1	1	1	9	19	5	5	15	8	0	1	1	1	0.952381	1	0.6	0.5	0	0	0.529412	0.684211
47184782	T	C	C	C	C	C	C	1	1	1	1	1	1	18	24	10	10	8	17	0	1	0.6	1	0	0	1	1	0	1	0.666667	1
93243389	C	T	T	T	T	T	T	1	1	1	1	1	1	76	22	16	39	33	28	0	1	1	1	1	1	0	1	0	1	0	0.266667
77904548	C	G	G	G	G	G	G	1	1	1	1	1	1	22	13	11	15	18	16	0	1	1	1	0	0	1	1	1	0.5	0.571429	0.2
26612547	C	T	T	T	T	T	T	1	1	1	1	1	1	2	4	2	5	6	9	0	1	1	1	0.285714	1	0	1	0	1	1	0
23259564	A	G	G	G	G	G	G	1	1	1	1	1	1	34	6	13	15	11	26	1	1	0.56	0.64	1	1	0	0.285714	0	0.53125	1	0.272727
6167915	T	C	C	C	C	C	C	1	1	1	1	1	1	3	13	15	33	4	111	0	1	0	0	0.666667	1	1	1	0	1	0.625	1
16228412	C	T	T	T	T	T	T	1	1	1	1	1	1	15	13	40	28	2	54	1	1	1	0	1	1	0.294118	1	0	1	0	0
23344520	T	C	C	C	C	C	C	1	1	1	1	1	1	31	32	10	33	19	25	0	1	1	1	1	1	0	0.3	0	1	1	0
17774250	C	G	G	G	G	G	G	1	1	1	1	1	1	26	23	23	38	45	13	1	1	0.5	1	1	0	0.857143	1	0.444444	0.5	0	0
14958584	T	C	C	C	C	C	C	1	1	1	1	1	1	8	10	13	4	6	9	0	0.272727	0.6	0.45	0.666667	1	0.916667	1	0	0.4	1	1
9523283	C	G	G	G	G	G	G	1	1	1	1	1	1	10	11	11	24	80	84	1	1	1	1	1	1	0.44	0	0	0.4	0	0.466667
33560393	G	T	T	T	T	T	T	1	1	1	1	1	1	22	30	21	31	9	26	1	0.6	1	0.444444	0	0	0.6	1	1	1	0.666667	0
16498753	C	T	T	T	T	T	T	1	1	1	1	1	1	17	8	7	6	2	4	0	0.315789	1	1	1	0.333333	1	1	0	0	0.666667	1
73640931	T	C	C	C	C	C	C	1	1	1	1	1	1	7	11	4	16	4	9	0	1	1	1	1	0.4	0	0	0.8	1	0.375	0.75
84336903	A	C	C	C	C	C	C	1	1	1	1	1	1	5	6	2	11	4	9	1	0	0	0	1	0	1	1	1	1	0.625	0.705882
134130474	G	C	C	C	C	C	C	1	1	1	1	1	1	45	31	36	22	27	24	1	1	0.513514	0.363636	0.454545	1	0	1	1	0	0	1
28791888	C	T	T	T	T	T	T	1	1	1	1	1	1	2	13	4	10	3	15	0	0	1	1	0	1	1	0.333333	1	0	1	1
38954046	A	G	G	G	G	G	G	1	1	1	1	1	1	10	5	6	30	7	10	0	1	1	1	1	1	0.333333	0	0	1	1	0
5568435	G	T	T	T	T	T	T	1	1	1	1	1	1	28	9	24	37	17	48	0	1	1	1	1	1	0	0	0.333333	1	1	0
76877541	T	C	C	C	C	C	C	1	1	1	1	1	1	20	7	2	11	16	14	0	1	1	1	1	1	0	1	0	0	0.75	0.583333
35105527	G	A	A	A	A	A	A	1	1	1	1	1	1	4	9	5	2	8	7	1	0	0.318182	1	1	1	0.307692	0.272727	1	0.4375	1	0
55690967	C	T	T	T	T	T	T	1	1	1	1	1	1	8	9	4	7	3	8	0	1	0.846154	1	1	0	1	1	0	1	0	0.5
22759879	T	C	C	C	C	C	C	1	1	1	1	1	1	19	24	3	4	11	5	0	1	1	0.888889	0	0.833333	0.625	1	0	1	1	0
16248938	T	A	A	A	A	A	A	1	1	1	1	1	1	12	12	7	12	19	7	0	1	0.5	0.4	0.5	0.5	0.454545	1	0	1	1	1
40849183	C	A	A	A	A	A	A	1	1	1	1	1	1	10	18	33	41	17	37	0.675676	0.75	0	0.866667	0.526316	0.769231	0.409091	1	0.555556	0.222222	0.588235	1
77905331	G	A	A	A	A	A	A	1	1	1	1	1	1	31	22	19	25	29	20	1	1	1	1	0	0	1	1	0.222222	0.4375	0.444444	0.266667
31780489	T	C	C	C	C	C	C	1	1	1	1	1	1	12	7	12	22	3	10	1	0	0	1	1	0	1	1	0.375	1	0	1
12565507	T	C	C	C	C	C	C	1	1	1	1	1	1	4	14	8	8	13	15	1	1	1	1	1	1	1	0	0.375	0	0	0
49218925	T	C	C	C	C	C	C	1	1	1	1	1	1	18	8	2	15	12	7	1	1	1	1	1	0	1	0	0	0	0.384615	1
22994804	C	G	G	G	G	G	G	1	1	1	1	1	1	95	85	56	62	61	45	0	1	0.538462	0.538462	0.411765	0.5	1	1	0.4	0	1	1
89764797	T	C	C	C	C	C	C	1	1	1	1	1	1	20	17	8	6	16	2	0.833333	0.75	1	1	0.6	0.357143	0	0.857143	1	1	0	0
43185187	C	T	T	T	T	T	T	1	1	1	1	1	1	8	12	10	3	5	6	1	1	1	1	0	1	0	1	0	0.4	1	0
109139147	G	A	A	A	A	A	A	1	1	1	1	1	1	9	2	2	6	2	3	0.8	1	1	1	0	0	1	0.6	0	1	0	1
20689293	T	C	C	C	C	C	C	1	1	1	1	1	1	2	7	6	4	5	9	0	0	1	1	1	1	1	1	1	0	0	0.4
31532087	T	C	C	C	C	C	C	1	1	1	1	1	1	4	3	8	10	5	14	0	1	0	1	1	0	0.4	1	1	1	1	0
61693532	G	A	A	A	A	A	A	1	1	1	1	1	1	7	3	8	16	4	13	1	0	0	0.428571	1	0.444444	0	1	1	1	0.928571	0.6
54126835	G	C	C	C	C	C	C	1	1	1	1	1	1	32	3	3	14	7	8	1	1	1	0	0	1	1	0.777778	0	0.625	0	1
49218913	T	C	C	C	C	C	C	1	1	1	1	1	1	11	10	2	12	12	5	1	1	1	1	1	0	1	0	0	0	0.416667	1
56943316	A	G	G	G	G	G	G	1	1	1	1	1	1	5	4	6	2	3	3	0	1	1	1	1	0.666667	1	0.75	0	1	0	0
42568725	A	C	C	C	C	C	C	1	1	1	1	1	1	25	25	14	20	26	28	1	0.705882	1	0.777778	0.555556	0.5	0.705882	0.181818	1	0	0	1
29316618	C	T	T	T	T	T	T	1	1	1	1	1	1	2	2	4	8	4	13	0	0	1	0.5	0.933333	1	1	1	0	0	1	1
35827404	G	A	A	A	A	A	A	1	1	1	1	1	1	7	3	4	18	5	4	1	0	1	1	1	0	0.652174	1	0	0.8	1	0
11140401	C	T	T	T	T	T	T	1	1	1	1	1	1	84	54	33	97	126	211	0	1	1	0	0.608696	1	0.72	1	0.380952	0.574468	0.609375	0.559322
31852127	A	G	G	G	G	G	G	1	1	1	1	1	1	13	6	10	22	8	26	0	1	0.416667	1	0.2	0.526316	0.34375	1	0.969697	0	1	1
26651018	C	T	T	T	T	T	T	1	1	1	1	1	1	20	7	6	12	5	7	0	0	1	1	0	1	1	0.428571	1	0.571429	1	0.461538
69192658	T	C	C	C	C	C	C	1	1	1	1	1	1	9	7	7	8	16	5	0	1	1	0.777778	0.285714	1	1	0	1	0.4	0	1
23656203	A	G	G	G	G	G	G	1	1	1	1	1	1	3	4	4	10	4	2	0	1	1	0	1	1	1	0	1	0.466667	0	1
17953103	A	G	G	G	G	G	G	1	1	1	1	1	1	15	4	4	6	7	4	0	1	0.857143	0.777778	1	1	1	0	1	0	0	0.833333
84442552	G	T	T	T	T	T	T	1	1	1	1	1	1	4	17	8	11	4	4	0.666667	0	0.75	1	1	0	1	1	0.454545	1	0.6	0
76405042	G	A	A	A	A	A	A	1	1	1	1	1	1	31	40	53	67	8	137	1	1	0	0.438849	0.5	1	1	0	0.533333	1	0	1
76664809	T	C	C	C	C	C	C	1	1	1	1	1	1	53	45	11	58	59	51	0	0.676471	0	0.6	0	0.2	1	1	1	1	1	1
11141324	A	G	G	G	G	G	G	1	1	1	1	1	1	55	40	14	25	41	87	0	1	0.978261	0	0.6	1	0.857143	1	0.666667	0.560976	0.548387	0.266667
86521176	A	G	G	G	G	G	G	1	1	1	1	1	1	145	108	39	108	62	84	0.96875	0.183673	1	1	1	1	0.381679	0.234375	0	0.434978	0.284091	1
6111312	A	G	G	G	G	G	G	1	1	1	1	1	1	9	2	15	11	7	19	0	1	0.714286	1	0.857143	1	1	0.916667	0	1	0	0
84336564	C	T	T	T	T	T	T	1	1	1	1	1	1	8	2	4	24	12	5	0	0	1	1	1	1	1	0.5	1	0	0.666667	0.321429
31858369	A	G	G	G	G	G	G	1	1	1	1	1	1	13	9	20	23	9	18	1	0	0.333333	1	0.235294	0.5	1	0.1875	1	0.733333	0.5	1
77904771	C	T	T	T	T	T	T	1	1	1	1	1	1	11	10	5	7	21	5	1	1	1	1	0	0	1	1	0.857143	0	0.363636	0.272727
46154180	A	G	G	G	G	G	G	1	1	1	1	1	1	13	12	2	4	12	35	1	1	1	1	1	0	0	1	0	0	0.5	1
13111458	A	G	G	G	G	G	G	1	1	1	1	1	1	28	6	4	9	11	3	0	0	1	1	0	1	0.5	1	1	1	1	0
119667174	C	T	T	T	T	T	T	1	1	1	1	1	1	2	8	12	7	7	2	0	1	0	1	0	1	1	0	0.5	1	1	1
10094805	G	A	A	A	A	A	A	1	1	1	1	1	1	2	2	5	7	5	4	0	0	0	1	1	0	1	1	1	1	1	0.5
18249936	G	A	A	A	A	A	A	1	1	1	1	1	1	41	5	21	24	20	61	1	1	1	1	1	1	0	0	0.5	0	1	0
131499433	T	C	C	C	C	C	C	1	1	1	1	1	1	11	11	8	9	9	6	0	0	1	1	1	1	1	0	0	1	0.5	1
40019102	T	C	C	C	C	C	C	1	1	1	1	1	1	3	6	5	7	7	6	1	0	1	1	1	1	1	0.5	0	0	0	1
29316617	T	C	C	C	C	C	C	1	1	1	1	1	1	2	2	4	8	4	13	0	0	1	0.5	1	1	1	1	0	0	1	1
46148537	A	G	G	G	G	G	G	1	1	1	1	1	1	12	11	5	6	6	2	0	1	1	1	1	1	0	1	0	0	0.5	1
1573523	A	G	G	G	G	G	G	1	1	1	1	1	1	17	5	9	11	2	12	0.285714	0.5	1	1	1	1	0	0.857143	0.666667	0.666667	0.52381	0
54465271	T	C	C	C	C	C	C	1	1	1	1	1	1	27	19	7	15	20	23	0	1	0	0.555556	1	0.722222	0.454545	0.666667	1	0.666667	0.4375	1
71463580	T	C	C	C	C	C	C	1	1	1	1	1	1	70	109	19	46	19	16	0.833333	0.590909	1	0.675	0.705882	0.55	1	0.809524	0	0.680851	0.657658	0
84336571	C	A	A	A	A	A	A	1	1	1	1	1	1	8	2	4	24	12	5	0	0	1	1	1	1	1	0.583333	0.952381	0	0.666667	0.304348
47914057	T	C	C	C	C	C	C	1	1	1	1	1	1	10	8	11	8	5	5	0	1	0.428571	1	1	0.357143	1	0	0	1	0.727273	1
2762243	A	G	G	G	G	G	G	1	1	1	1	1	1	7	4	5	5	13	9	0	1	1	1	0	1	0.454545	1	0	0.272727	0.785714	1
27279615	A	G	G	G	G	G	G	1	1	1	1	1	1	21	5	5	9	14	8	1	1	0.8	0.5	0	1	0.222222	0	0	1	1	1
6042817	A	G	G	G	G	G	G	1	1	1	1	1	1	16	19	5	20	13	37	0	1	1	1	1	1	1	0.6	0	0	0.483871	0.444444
76002832	T	C	C	C	C	C	C	1	1	1	1	1	1	340	148	45	81	159	99	1	0	0.49505	1	0.540816	1	0.528736	0.431507	0	1	0.544218	0.988304
99143994	A	G	G	G	G	G	G	1	1	1	1	1	1	31	8	8	22	11	24	0	1	1	1	1	1	0	0.666667	0	0.454545	0.428571	1
102023459	G	C	C	C	C	C	C	1	1	1	1	1	1	21	8	15	28	16	24	0	1	1	1	1	0	0.625	0.5	0	1	0.428571	1
39612747	G	C	C	C	C	C	C	1	1	1	1	1	1	9	6	2	9	2	3	1	0.888889	1	0.4	1	1	0.6	0	0	0.666667	0.333333	0.666667
48732200	C	A	A	A	A	A	A	1	1	1	1	1	1	6	2	3	4	5	2	1	1	1	1	0	1	1	0	0	0	1	0.555556
24441281	T	C	C	C	C	C	C	1	1	1	1	1	1	26	16	4	14	8	2	1	1	1	0.956522	1	1	1	0.6	0	0	0	0
5414423	T	A	A	A	A	A	A	1	1	1	1	1	1	9	4	5	11	4	2	1	0	1	0.6	0.631579	1	0.894737	0	0.5	0.5	1	0.434783
12485646	G	T	T	T	T	T	T	1	1	1	1	1	1	23	22	8	23	17	16	1	1	1	1	0.666667	1	1	0	0.3	0.6	0	0
54519773	C	G	G	G	G	G	G	1	1	1	1	1	1	13	2	5	10	6	2	1	1	1	1	1	1	1	0	0	0	0.571429	0
9478375	T	C	C	C	C	C	C	1	1	1	1	1	1	10	9	2	2	2	4	1	1	1	1	0	0	1	0.571429	0	1	1	0
77896752	G	A	A	A	A	A	A	1	1	1	1	1	1	17	3	18	17	7	55	1	0	1	0.571429	1	1	1	0	0	1	0	1
111144446	C	A	A	A	A	A	A	1	1	1	1	1	1	7	4	3	17	4	9	0	0.714286	1	0.764706	0.857143	0.833333	0	0.625	0.857143	1	0.545455	0.375
6439417	T	C	C	C	C	C	C	1	1	1	1	1	1	32	19	32	22	37	6	0	1	0.277108	0	0	1	1	0.296296	1	1	1	1
8154381	A	G	G	G	G	G	G	1	1	1	1	1	1	2	3	8	14	3	2	1	0	1	1	1	0	0.666667	0.625	0.615385	0	0.666667	1
116744707	T	G	G	G	G	G	G	1	1	1	1	1	1	4	3	26	17	3	7	0.888889	0	1	1	0.285714	0	1	0.4	1	1	0	1
71186074	T	C	C	C	C	C	C	1	1	1	1	1	1	20	2	7	12	6	3	1	1	1	1	1	1	1	0	0	0	0	0.583333
73478100	T	G	G	G	G	G	G	1	1	1	1	1	1	3	1	7	5	6	5	1	1	0	1	0	1	0	1	0.666667	0.25	1	0.666667
33024932	C	G	G	G	G	G	G	1	1	1	1	1	1	29	20	10	25	26	23	0	1	1	1	1	1	0	1	0.333333	0.782609	0.470588	0
42616779	A	G	G	G	G	G	G	1	1	1	1	1	1	6	20	2	9	6	17	1	0	0	1	0.307692	0	1	1	1	1	1	0.285714
102524147	A	G	G	G	G	G	G	1	1	1	1	1	1	10	9	23	24	7	5	1	1	0	0	0.478261	0.448276	1	0.413793	1	1	0.588235	0.666667
70711570	A	G	G	G	G	G	G	1	1	1	1	1	1	5	6	2	4	9	8	0	1	1	1	0	0	1	0	1	1	1	0.6
145563289	G	A	A	A	A	A	A	1	1	1	1	1	1	2	2	3	3	9	2	0	1	1	1	0	0	1	0.6	0	1	1	1
71436709	G	A	A	A	A	A	A	1	1	1	1	1	1	43	42	18	38	31	35	1	1	1	1	1	1	0	1	0.6	0	0	0
107729691	C	A	A	A	A	A	A	1	1	1	1	1	1	18	3	10	10	4	4	1	0	1	1	1	1	1	0.6	0	1	0	0
119353794	A	G	G	G	G	G	G	1	1	1	1	1	1	9	11	7	10	14	11	0	0	1	1	1	1	1	1	0	0	1	0.6
49085984	C	A	A	A	A	A	A	1	1	1	1	1	1	38	14	10	36	21	15	1	1	1	1	1	0.5	0	0	1	0	0.25	0.857143
66995310	C	T	T	T	T	T	T	1	1	1	1	1	1	20	5	26	49	10	21	0.727273	1	1	1	0.5	0.538462	0.616667	0.478261	0	1	0	0.75
86619961	G	C	C	C	C	C	C	1	1	1	1	1	1	10	7	9	10	14	13	0	1	1	1	1	1	0	0.833333	0	0.777778	0	1
49372502	C	T	T	T	T	T	T	1	1	1	1	1	1	9	8	16	27	2	13	1	1	0.961538	1	0	1	0.606061	0.387097	0.75	0.533333	0.375	0
112006196	T	C	C	C	C	C	C	1	1	1	1	1	1	6	17	39	29	6	6	1	0	1	1	1	1	0.615385	1	1	0	0	0
34311777	T	C	C	C	C	C	C	1	1	1	1	1	1	5	5	3	3	7	5	1	0	1	0	0	0	0.8	1	1	1	1	0.818182
979536	G	T	T	T	T	T	T	1	1	1	1	1	1	14	18	14	7	16	3	0	1	1	1	1	1	0	0	0.857143	0.8	0.434783	0.526316
8923722	A	G	G	G	G	G	G	1	1	1	1	1	1	47	23	18	30	20	45	1	1	1	0.954545	1	0.8	0	0	0.424242	1	0	0.444444
67640760	T	C	C	C	C	C	C	1	1	1	1	1	1	27	23	4	17	6	18	1	1	1	1	1	1	1	0	0	0	0.307692	0.315789
8987672	G	T	T	T	T	T	T	1	1	1	1	1	1	133	106	77	133	80	136	1	1	0.465278	0.460784	0.532258	0.469565	1	1	0.166667	0.535714	0	1
6040950	T	A	A	A	A	A	A	1	1	1	1	1	1	4	15	38	96	44	220	0	1	1	1	1	1	1	0.9375	0	0.285714	0.230769	0.176471
21081487	G	A	A	A	A	A	A	1	1	1	1	1	1	13	16	3	6	13	5	0	1	1	1	1	1	0	1	0	0	0.636364	1
27079325	A	C	C	C	C	C	C	1	1	1	1	1	1	22	15	22	27	13	10	1	1	0.833333	0.37037	1	1	0	0	0.625	0.47619	1	0.333333
43703687	A	G	G	G	G	G	G	1	1	1	1	1	1	39	23	6	15	21	5	0	1	1	0.933333	1	0.666667	0.571429	0.333333	0.666667	0.470588	0	1
37501779	C	T	T	T	T	T	T	1	1	1	1	1	1	20	7	6	8	4	7	0	1	1	1	1	1	1	0.416667	0	0.230769	0	1
6971220	G	A	A	A	A	A	A	1	1	1	1	1	1	181	108	108	233	103	253	1	1	1	1	0.463415	0.518519	0	0.5	1	0.434783	0.367347	0.37931
8987824	A	G	G	G	G	G	G	1	1	1	1	1	1	210	100	58	150	78	146	1	1	0.406417	0.384615	0.446429	0.462185	1	1	0.520833	0.445161	0	1
47630779	A	G	G	G	G	G	G	1	1	1	1	1	1	23	1	6	21	3	5	1	1	1	1	0	1	1	1	0	0	0	0.666667
65752963	A	G	G	G	G	G	G	1	1	1	1	1	1	12	11	3	2	7	11	0	1	1	1	0	1	1	0.666667	0	1	1	0
15345694	C	A	A	A	A	A	A	1	1	1	1	1	1	12	4	4	8	7	3	1	1	1	0	1	0	0.666667	1	0	1	1	0
103704003	G	C	C	C	C	C	C	1	1	1	1	1	1	13	16	4	11	9	9	0	1	1	1	0	1	0.666667	1	1	1	0	0
70052153	C	A	A	A	A	A	A	1	1	1	1	1	1	7	11	3	13	17	4	0	1	1	1	0	1	0	0	1	1	1	0.666667
109163249	C	G	G	G	G	G	G	1	1	1	1	1	1	8	5	11	24	20	31	0	1	1	1	1	0	1	0.666667	0	1	0	1
9661264	T	C	C	C	C	C	C	1	1	1	1	1	1	2	2	1	12	4	3	0	0	1	1	1	0	0.666667	1	0	1	1	1
57103326	A	G	G	G	G	G	G	1	1	1	1	1	1	28	4	6	12	2	9	0	1	0	1	0	1	1	1	1	0	1	0.666667
65997758	G	A	A	A	A	A	A	1	1	1	1	1	1	13	18	7	10	3	7	0	0	1	1	0	0	1	0.666667	1	1	1	1
4112296	T	C	C	C	C	C	C	1	1	1	1	1	1	20	27	12	14	8	9	0	1	1	1	1	1	1	1	0	0.666667	0	0
77502997	T	C	C	C	C	C	C	1	1	1	1	1	1	2	2	8	2	2	5	1	0	0	1	1	1	1	0	1	0.666667	0	1
7010460	G	A	A	A	A	A	A	1	1	1	1	1	1	9	3	3	4	3	2	0	1	0.666667	1	1	1	0	0	1	0	1	1
119815137	A	G	G	G	G	G	G	1	1	1	1	1	1	27	8	4	18	24	12	1	0	1	1	1	1	1	0	0	0	0.666667	1
120428195	T	C	C	C	C	C	C	1	1	1	1	1	1	30	41	10	12	19	11	1	0.615385	0.6	1	1	0.666667	0.5	0	0.285714	1	0	1
6971391	G	T	T	T	T	T	T	1	1	1	1	1	1	119	103	95	151	109	210	1	1	1	1	0.488372	0.435897	0	0.5	1	0.4	0.44	0.407407
25425822	C	T	T	T	T	T	T	1	1	1	1	1	1	188	25	23	18	30	22	0	1	1	1	1	1	0	0.4	0	0.272727	1	1
101335699	T	A	A	A	A	A	A	1	1	1	1	1	1	9	3	15	7	2	5	1	0	1	0.428571	1	0	1	0.181818	0.571429	1	0.5	1
57311476	T	C	C	C	C	C	C	1	1	1	1	1	1	24	10	10	6	3	3	0	1	1	1	1	1	0.583333	0	0	0.647059	0.454545	1
49610765	T	A	A	A	A	A	A	1	1	1	1	1	1	8	11	4	5	9	9	1	0	1	0	1	0	0.970588	0.857143	0.863636	0	1	1
6971332	T	C	C	C	C	C	C	1	1	1	1	1	1	159	77	87	167	64	271	1	0.966667	1	1	0.45	0.605263	0	0.553191	1	0.40678	0.34375	0.368421
6133883	C	T	T	T	T	T	T	1	1	1	1	1	1	23	16	67	96	22	128	0.5	1	0	0	0.333333	1	1	1	0	1	0.866667	1
5643579	G	A	A	A	A	A	A	1	1	1	1	1	1	40	18	9	6	19	15	0	1	0.416667	0	1	0.285714	0	1	1	1	1	1
22995865	T	C	C	C	C	C	C	1	1	1	1	1	1	175	191	63	120	110	52	0.614583	1	0.462069	0.491228	0.409836	0.419355	1	1	0.309524	0	1	1
84326998	T	C	C	C	C	C	C	1	1	1	1	1	1	3	5	2	4	4	5	0	0	1	1	1	1	1	0	1	1	0.538462	0.172414
23929308	C	T	T	T	T	T	T	1	1	1	1	1	1	18	23	5	5	2	13	1	0	0.714286	1	1	1	1	0	0	1	0	1
72276025	T	C	C	C	C	C	C	1	1	1	1	1	1	5	7	4	6	5	2	0	1	1	1	1	0	0	1	0	1	1	0.714286
42616969	G	A	A	A	A	A	A	1	1	1	1	1	1	2	25	21	18	3	21	0	0	1	0.882353	0	0	1	1	1	1	1	0.833333
69415098	A	T	T	T	T	T	T	1	1	1	1	1	1	3	10	3	2	2	7	1	0.5	0.333333	1	0	0	1	1	1	1	0	0.888889
97070999	A	G	G	G	G	G	G	1	1	1	1	1	1	10	3	21	25	10	3	0	1	1	0.866667	1	1	0	1	0	0	0.857143	1
6042575	A	G	G	G	G	G	G	1	1	1	1	1	1	16	23	45	54	25	112	0	1	1	1	1	1	1	0.666667	0	0	0.487179	0.576923
49067156	T	G	G	G	G	G	G	1	1	1	1	1	1	18	18	10	10	13	5	1	1	1	1	1	1	0	0.333333	0	1	0.4	0
67100061	T	C	C	C	C	C	C	1	1	1	1	1	1	10	10	10	16	4	2	0.888889	1	1	0	1	0.75	0.5	1	0	0	0.6	1
9953226	T	C	C	C	C	C	C	1	1	1	1	1	1	21	13	8	13	14	13	1	1	0.5	0.5	1	1	0	0.75	0	1	0.461538	0.533333
76790584	A	G	G	G	G	G	G	1	1	1	1	1	1	18	8	16	17	22	8	1	0.333333	0.358974	0.692308	0	1	1	0.4	0.692308	1	1	0.269231
83270040	G	A	A	A	A	A	A	1	1	1	1	1	1	6	9	8	10	10	6	1	0	1	1	0.75	0	1	1	1	1	0	0
29269822	G	T	T	T	T	T	T	1	1	1	1	1	1	10	15	7	3	2	2	0	0.75	1	1	0	1	1	1	0	1	1	0
29366925	C	T	T	T	T	T	T	1	1	1	1	1	1	6	2	3	7	2	2	0	1	1	1	0	0.75	1	1	0	1	1	0
29366962	C	T	T	T	T	T	T	1	1	1	1	1	1	11	2	4	6	2	2	0	1	1	1	0	0.75	1	1	0	1	1	0
32385292	A	C	C	C	C	C	C	1	1	1	1	1	1	5	3	2	14	10	13	0	1	1	0	1	1	0	0	1	1	0.75	1
93244933	T	C	C	C	C	C	C	1	1	1	1	1	1	26	40	13	26	22	9	0	1	1	1	1	1	0	0.75	0	1	0	1
67796349	A	G	G	G	G	G	G	1	1	1	1	1	1	12	9	10	13	7	15	0	0.5	1	1	0	0.6	1	0	1	1	0.666667	1
67796353	T	C	C	C	C	C	C	1	1	1	1	1	1	15	7	9	12	7	18	0	0.5	1	1	0	0.6	1	0	1	1	0.666667	1
127794246	C	A	A	A	A	A	A	1	1	1	1	1	1	10	16	4	10	11	22	0	1	0	0.7	1	0.6	1	1	0.466667	0	1	1
97071005	C	T	T	T	T	T	T	1	1	1	1	1	1	8	3	19	24	9	3	0	1	1	0.916667	1	1	0	1	0	0	0.857143	1
97071009	G	A	A	A	A	A	A	1	1	1	1	1	1	8	3	19	24	9	3	0	1	1	0.916667	1	1	0	1	0	0	0.857143	1
6042644	A	C	C	C	C	C	C	1	1	1	1	1	1	5	16	32	41	18	94	0	1	1	1	1	1	1	0.777778	0	0	0.461538	0.545455
14788614	A	T	T	T	T	T	T	1	1	1	1	1	1	38	39	15	19	33	43	0.454545	1	1	1	0	0.526316	0.269841	0.538462	1	1	0	1
53417346	T	C	C	C	C	C	C	1	1	1	1	1	1	10	2	3	12	12	16	1	0.75	1	1	1	1	0	0	0	0.5	0.545455	1
63405640	T	C	C	C	C	C	C	1	1	1	1	1	1	2	5	2	20	5	14	1	0	0.75	0.333333	1	1	1	0.5	0	0.5	1	0.714286
29862662	A	G	G	G	G	G	G	1	1	1	1	1	1	15	13	2	7	5	3	1	1	0.285714	1	0	1	0.545455	0	0.5	0.466667	1	1
6971349	C	G	G	G	G	G	G	1	1	1	1	1	1	157	87	97	200	76	298	1	1	1	1	0.508197	0.536585	0	0.5	1	0.365079	0.459459	0.428571
2767229	T	C	C	C	C	C	C	1	1	1	1	1	1	6	3	2	8	6	7	1	1	1	1	1	0	0.8	1	0	0	0	1
50009905	A	G	G	G	G	G	G	1	1	1	1	1	1	6	29	4	14	18	18	0	1	1	1	1	0	0.8	1	1	0	1	0
38339340	A	C	C	C	C	C	C	1	1	1	1	1	1	8	2	2	3	1	2	1	1	0	0.8	0	1	1	1	1	0	1	0
64539627	A	T	T	T	T	T	T	1	1	1	1	1	1	10	11	6	31	2	6	0	1	1	1	0	0	1	0.8	0	1	1	1
6028933	A	G	G	G	G	G	G	1	1	1	1	1	1	9	2	4	10	4	9	0	1	1	1	1	1	1	0.8	0	0	1	0
5854434	A	T	T	T	T	T	T	1	1	1	1	1	1	5	3	9	11	10	25	1	0	1	0	1	1	1	0	1	0	0.8	1
27897577	A	G	G	G	G	G	G	1	1	1	1	1	1	3	2	3	10	2	11	1	1	0	1	1	1	1	0	0	0	1	0.8
80990462	C	A	A	A	A	A	A	1	1	1	1	1	1	3	6	2	2	3	3	0	1	1	1	1	1	0	1	0	0.8	0	1
8987422	C	G	G	G	G	G	G	1	1	1	1	1	1	165	115	55	127	81	102	1	1	0.568	0.644737	0.422222	0.538462	1	1	0	0.630952	0	1
8367927	G	A	A	A	A	A	A	1	1	1	1	1	1	2	11	7	7	5	2	0	1	0.833333	1	0	0	1	1	0	1	1	1
28396723	T	C	C	C	C	C	C	1	1	1	1	1	1	11	17	3	18	11	2	1	0	1	0	0	0	1	1	1	0.833333	1	1
84839330	T	G	G	G	G	G	G	1	1	1	1	1	1	3	9	2	5	12	9	0	1	1	1	1	1	1	1	0	0.833333	0	0
84839333	A	T	T	T	T	T	T	1	1	1	1	1	1	3	9	2	5	10	9	0	1	1	1	1	1	1	1	0	0.833333	0	0
43081319	T	C	C	C	C	C	C	1	1	1	1	1	1	5	5	2	5	14	4	0	0	0	1	1	1	1	0.833333	1	0	1	1
67796359	C	G	G	G	G	G	G	1	1	1	1	1	1	15	7	9	13	7	17	0	0.5	1	1	0	0.666667	1	0	1	1	0.666667	1
9932734	A	G	G	G	G	G	G	1	1	1	1	1	1	15	8	10	17	14	7	1	0.666667	0	1	0	0.666667	1	0.846154	0.666667	0.571429	0.666667	0.75
16463673	G	A	A	A	A	A	A	1	1	1	1	1	1	10	3	10	5	4	8	0.636364	1	0.8	0	1	0.4	1	0	1	0	1	1
28849	A	G	G	G	G	G	G	1	1	1	1	1	1	32	6	6	4	8	8	1	1	0.4375	1	1	1	0.8	0.363636	0	0	0.25	1
37860983	C	T	T	T	T	T	T	1	1	1	1	1	1	24	45	33	53	41	64	0.578947	1	0.944444	0	0.833333	0	1	1	0.5	0	1	1
49095342	G	A	A	A	A	A	A	1	1	1	1	1	1	133	45	36	35	46	42	1	1	1	1	1	0.571429	0.275862	0	1	0	0.422222	0.596491
6971357	A	G	G	G	G	G	G	1	1	1	1	1	1	173	110	113	203	93	320	1	1	1	1	0.47541	0.543478	0	0.507937	1	0.410959	0.486486	0.442857
108808216	A	G	G	G	G	G	G	1	1	1	1	1	1	5	6	4	12	8	3	1	0	0.875	1	0	0	1	1	0	1	1	1
131499400	C	G	G	G	G	G	G	1	1	1	1	1	1	10	7	3	8	10	8	0	0	1	1	1	1	1	0	1	1	0.875	0
71969126	T	C	C	C	C	C	C	1	1	1	1	1	1	9	10	5	28	13	15	0	1	1	1	0	1	0.428571	1	0.666667	0.684211	0.722222	0.375
5140623	A	G	G	G	G	G	G	1	1	1	1	1	1	4	7	2	10	8	5	0	1	1	1	0	1	1	1	0.357143	1	0	0.526316
34311773	T	C	C	C	C	C	C	1	1	1	1	1	1	6	5	3	5	7	6	1	0	1	0	0	0.4	0.7	1	1	1	1	0.785714
34345372	G	A	A	A	A	A	A	1	1	1	1	1	1	13	4	14	9	3	6	1	0	1	1	1	1	0	0	0.222222	1	0.666667	1
39612752	G	A	A	A	A	A	A	1	1	1	1	1	1	8	6	2	9	2	3	1	0.888889	1	0.4	1	1	0.6	0	0	1	0.333333	0.666667
49095657	T	C	C	C	C	C	C	1	1	1	1	1	1	121	63	57	63	58	57	1	1	1	0.977528	1	0.421053	0.526882	0	1	0	0.523077	0.441441
8988297	G	A	A	A	A	A	A	1	1	1	1	1	1	144	129	79	93	64	46	1	1	0.455197	0.545455	0.412281	0.419192	1	1	0.52459	0.538462	0	1
124611429	T	C	C	C	C	C	C	1	1	1	1	1	1	2	15	2	9	2	4	0.9	1	1	0	1	1	1	0	0	1	0	1
3070866	A	G	G	G	G	G	G	1	1	1	1	1	1	63	37	53	36	27	52	0	0	1	0.904762	0	0	1	1	1	1	1	1
5844208	T	C	C	C	C	C	C	1	1	1	1	1	1	8	4	4	17	5	36	1	1	1	1	1	1	1	0	0	0	0.434783	0.470588
32185177	C	G	G	G	G	G	G	1	1	1	1	1	1	73	23	36	68	30	68	1	0	0.25	0.75	1	0.6875	0.444444	1	0.235294	0.538462	1	1
49216631	G	T	T	T	T	T	T	1	1	1	1	1	1	42	38	34	80	28	25	1	1	1	1	1	0.5	0.30303	0	0.96	0	0.185185	0.964286
6168038	G	T	T	T	T	T	T	1	1	1	1	1	1	2	13	21	27	8	61	0.75	1	0	0.666667	0	1	1	1	0	1	0.5	1
64314031	A	G	G	G	G	G	G	1	1	1	1	1	1	51	50	26	55	28	28	1	1	0.960784	1	1	1	0.666667	0	0	0.5	0.793103	0
112864693	A	G	G	G	G	G	G	1	1	1	1	1	1	49	26	27	47	47	32	0.529412	1	0.567568	0.54	0.608696	0	1	1	0	1	0.675	1
46165863	A	G	G	G	G	G	G	1	1	1	1	1	1	34	14	15	4	11	17	1	1	1	1	1	1	1	0	0	0	0	0.925926
26757240	A	G	G	G	G	G	G	1	1	1	1	1	1	16	12	2	28	9	6	0	0.428571	0	0.5	0	1	1	1	1	1	1	1
87704730	C	T	T	T	T	T	T	1	1	1	1	1	1	10	8	3	7	5	6	0	1	1	1	1	1	0	0.5	0	0.714286	0.727273	1
28206987	T	C	C	C	C	C	C	1	1	1	1	1	1	100	109	43	93	72	24	0.55615	0.586957	0.612903	1	0.366667	0.558824	0.716981	0.415094	0.482759	0.648649	1	1
49216632	C	T	T	T	T	T	T	1	1	1	1	1	1	41	38	35	81	30	26	1	1	1	1	1	0.5	0.30303	0	0.96	0	0.185185	1
11051182	T	C	C	C	C	C	C	1	1	1	1	1	1	14	23	4	13	17	10	0	1	1	1	1	1	1	0.285714	0	0.666667	0	1
5414663	G	A	A	A	A	A	A	1	1	1	1	1	1	2	3	5	5	8	2	1	1	1	1	0.5	1	1	0	0	0	1	0.454545
37849842	G	T	T	T	T	T	T	1	1	1	1	1	1	22	15	7	10	12	19	0	1	1	0	0.555556	0	1	1	1	0.4	1	1
37335799	A	G	G	G	G	G	G	1	1	1	1	1	1	4	7	14	7	5	9	1	1	0	0.5	1	1	1	0.387097	0.571429	0.5	0	1
73302986	C	G	G	G	G	G	G	1	1	1	1	1	1	34	5	6	10	2	2	1	1	1	1	0	1	0.62963	1	0	0.666667	0	0.666667
39737608	G	C	C	C	C	C	C	1	1	1	1	1	1	37	36	1	22	14	14	1	1	1	1	1	1	0.466667	0	0	0	0.5	1
24925164	A	G	G	G	G	G	G	1	1	1	1	1	1	26	5	5	17	13	6	0	1	1	1	1	1	1	0.428571	1	0	0	0.545455
22390438	A	G	G	G	G	G	G	1	1	1	1	1	1	25	20	12	42	19	24	1	0	1	1	1	1	0.5625	0	1	0.416667	0	1
28310204	T	C	C	C	C	C	C	1	1	1	1	1	1	56	16	32	47	52	87	0	1	0	1	0.981132	1	0	1	1	0	1	1
37860935	A	G	G	G	G	G	G	1	1	1	1	1	1	27	53	28	55	33	48	0.642857	1	0.954545	0	0.75	0	1	1	0.333333	0.307692	1	1
41103753	A	G	G	G	G	G	G	1	1	1	1	1	1	13	5	9	11	3	6	1	1	1	1	0	1	0.357143	0.636364	0	1	1	0
8985535	A	G	G	G	G	G	G	1	1	1	1	1	1	66	80	27	48	26	40	1	1	0.428571	0.5	0.6	0.548387	1	1	0.375	0.545455	0	1
7783905	T	C	C	C	C	C	C	1	1	1	1	1	1	23	21	42	14	19	22	0.4	1	1	1	1	0.454545	0.285714	0.454545	0.4	1	0.481481	0.521739
3373221	A	G	G	G	G	G	G	1	1	1	1	1	1	3	10	3	10	5	4	1	1	1	1	1	0	0	0	1	1	1	0
3373229	G	C	C	C	C	C	C	1	1	1	1	1	1	3	10	4	10	8	4	1	1	1	1	1	0	0	0	1	1	1	0
13917065	A	G	G	G	G	G	G	1	1	1	1	1	1	8	9	8	9	3	9	1	1	1	1	0	1	1	1	0	0	1	0
36807662	T	C	C	C	C	C	C	1	1	1	1	1	1	9	12	5	17	6	7	1	1	1	1	1	0	1	0	0	1	1	0
38269514	A	T	T	T	T	T	T	1	1	1	1	1	1	7	10	4	10	6	18	1	1	1	1	0	1	1	0	0	1	1	0
22191961	A	G	G	G	G	G	G	1	1	1	1	1	1	6	6	2	4	5	2	1	1	1	1	1	0	1	1	0	0	1	0
20092443	A	G	G	G	G	G	G	1	1	1	1	1	1	3	3	3	11	8	5	1	1	1	1	0	1	1	0	0	1	1	0
15718267	C	T	T	T	T	T	T	1	1	1	1	1	1	12	13	15	8	3	7	1	1	1	1	1	0	1	1	0	0	0	1
14093016	T	C	C	C	C	C	C	1	1	1	1	1	1	3	6	6	3	4	2	1	1	1	1	0	1	0	0	0	1	1	1
20723258	T	G	G	G	G	G	G	1	1	1	1	1	1	12	2	2	7	9	2	1	1	1	1	0	1	0	0	0	1	1	1
42210478	G	A	A	A	A	A	A	1	1	1	1	1	1	12	9	7	14	5	7	1	1	1	1	0	1	0	1	0	1	0	1
30723304	T	C	C	C	C	C	C	1	1	1	1	1	1	4	6	10	11	2	8	1	1	1	1	0	0	1	1	1	1	0	0
57122485	T	C	C	C	C	C	C	1	1	1	1	1	1	7	7	4	9	19	13	0	1	1	1	1	0	0	1	1	1	1	0
1405310	C	T	T	T	T	T	T	1	1	1	1	1	1	8	14	10	14	6	16	0	1	1	1	0	1	0	1	1	1	1	0
5570652	G	A	A	A	A	A	A	1	1	1	1	1	1	4	2	12	15	12	17	0	1	1	1	0	1	1	1	0	1	1	0
22662101	A	G	G	G	G	G	G	1	1	1	1	1	1	8	2	6	4	3	4	0	1	1	1	1	0	1	1	0	1	1	0
29269816	T	C	C	C	C	C	C	1	1	1	1	1	1	11	16	8	3	3	2	0	1	1	1	0	1	1	1	0	1	1	0
29269819	G	A	A	A	A	A	A	1	1	1	1	1	1	9	16	8	3	3	2	0	1	1	1	0	1	1	1	0	1	1	0
29269821	G	C	C	C	C	C	C	1	1	1	1	1	1	10	16	8	3	3	2	0	1	1	1	0	1	1	1	0	1	1	0
56855651	N	G	G	G	G	G	G	1	1	1	1	1	1	5	12	7	10	11	3	0	1	1	1	0	1	1	1	1	1	0	0
136710265	T	C	C	C	C	C	C	1	1	1	1	1	1	10	5	7	7	3	2	1	1	1	1	0	0	1	0	1	1	1	0
39251933	T	G	G	G	G	G	G	1	1	1	1	1	1	5	3	8	4	6	3	1	1	1	1	0	0	1	1	0	1	1	0
1090125	G	A	A	A	A	A	A	1	1	1	1	1	1	6	5	3	3	2	7	0	1	1	1	1	0	1	1	1	1	0	0
24324267	G	C	C	C	C	C	C	1	1	1	1	1	1	13	5	4	2	5	10	0	1	1	1	1	0	1	0	1	1	1	0
34244474	A	G	G	G	G	G	G	1	1	1	1	1	1	4	2	4	10	3	5	0	1	1	1	1	0	1	0	1	1	1	0
34244475	T	C	C	C	C	C	C	1	1	1	1	1	1	4	2	3	10	3	5	0	1	1	1	1	0	1	0	1	1	1	0
34244506	G	A	A	A	A	A	A	1	1	1	1	1	1	3	2	5	10	3	4	0	1	1	1	1	0	1	0	1	1	1	0
41891087	A	G	G	G	G	G	G	1	1	1	1	1	1	12	4	5	11	6	18	0	1	1	1	0	1	1	1	0	1	1	0
4005579	A	G	G	G	G	G	G	1	1	1	1	1	1	3	6	2	5	6	4	0	1	1	1	0	1	1	1	0	1	1	0
89756132	T	C	C	C	C	C	C	1	1	1	1	1	1	10	5	3	4	5	9	0	1	1	1	0	1	1	1	0	1	0	1
11042553	G	A	A	A	A	A	A	1	1	1	1	1	1	5	8	4	5	9	16	0	1	1	1	0	1	0	1	1	1	0	1
11042562	C	T	T	T	T	T	T	1	1	1	1	1	1	5	8	4	4	9	16	0	1	1	1	0	1	0	1	1	1	0	1
11042580	T	A	A	A	A	A	A	1	1	1	1	1	1	5	8	4	4	9	16	0	1	1	1	0	1	0	1	1	1	0	1
91305468	G	C	C	C	C	C	C	1	1	1	1	1	1	5	14	8	4	2	8	0	1	1	1	0	1	0	1	0	1	1	1
91305491	G	A	A	A	A	A	A	1	1	1	1	1	1	3	15	7	2	2	7	0	1	1	1	0	1	0	1	0	1	1	1
104392694	T	C	C	C	C	C	C	1	1	1	1	1	1	11	9	4	4	15	3	0	1	1	1	1	0	1	0	0	1	1	1
104395079	A	G	G	G	G	G	G	1	1	1	1	1	1	8	9	5	8	11	3	0	1	1	1	1	0	1	0	1	1	0	1
36769124	A	G	G	G	G	G	G	1	1	1	1	1	1	21	9	2	5	6	2	0	1	1	1	0	1	0	1	0	1	1	1
21190784	N	G	G	G	G	G	G	1	1	1	1	1	1	9	3	2	5	3	4	0	1	1	1	1	0	1	1	0	1	0	1
25419980	G	T	T	T	T	T	T	1	1	1	1	1	1	2	4	4	2	7	4	0	1	1	1	0	1	1	1	0	1	0	1
25419983	A	C	C	C	C	C	C	1	1	1	1	1	1	2	4	4	2	7	4	0	1	1	1	0	1	1	1	0	1	0	1
48537775	T	C	C	C	C	C	C	1	1	1	1	1	1	11	19	17	9	4	7	1	0	1	1	0	1	0	1	1	1	0	1
33041176	A	G	G	G	G	G	G	1	1	1	1	1	1	9	7	4	5	7	3	1	1	1	1	0	0	1	1	0	0	1	1
750131	T	C	C	C	C	C	C	1	1	1	1	1	1	2	9	5	12	4	9	0	1	1	1	1	0	1	0	0	1	1	1
21278925	C	T	T	T	T	T	T	1	1	1	1	1	1	8	6	5	3	4	4	0	1	1	1	0	1	1	1	0	1	0	1
35101587	G	A	A	A	A	A	A	1	1	1	1	1	1	5	9	4	9	4	2	0	1	1	1	1	0	1	1	0	1	0	1
59366666	A	G	G	G	G	G	G	1	1	1	1	1	1	2	5	4	6	2	4	0	1	1	1	0	1	1	1	0	1	0	1
26719697	A	G	G	G	G	G	G	1	1	1	1	1	1	10	9	5	2	5	14	0	1	1	1	0	1	1	0	0	1	1	1
43186181	T	C	C	C	C	C	C	1	1	1	1	1	1	7	9	6	5	6	2	0	1	1	1	1	0	0	1	0	1	1	1
4754617	G	T	T	T	T	T	T	1	1	1	1	1	1	8	6	6	13	13	14	0	1	1	1	0	1	0	1	0	1	1	1
63651945	A	G	G	G	G	G	G	1	1	1	1	1	1	7	16	8	10	13	2	0	1	1	1	0	1	1	1	0	1	0	1
90582555	T	A	A	A	A	A	A	1	1	1	1	1	1	5	5	9	16	4	6	0	1	1	1	0	1	1	1	0	0	1	1
105901645	C	T	T	T	T	T	T	1	1	1	1	1	1	3	2	4	10	7	6	0	1	1	1	0	1	1	0	1	1	0	1
105901664	C	T	T	T	T	T	T	1	1	1	1	1	1	4	5	4	3	11	6	0	1	1	1	0	1	1	0	1	1	0	1
22361077	G	A	A	A	A	A	A	1	1	1	1	1	1	22	10	3	4	7	6	0	1	1	1	1	0	0	1	1	1	0	1
2017103	A	G	G	G	G	G	G	1	1	1	1	1	1	9	6	2	10	6	11	0	1	1	1	0	1	0	0	1	1	1	1
13615594	A	G	G	G	G	G	G	1	1	1	1	1	1	6	2	7	4	15	8	0	1	1	1	0	1	1	0	1	1	0	1
17891557	G	A	A	A	A	A	A	1	1	1	1	1	1	29	8	14	6	5	21	0	1	1	1	0	1	1	1	0	1	0	1
23734820	T	C	C	C	C	C	C	1	1	1	1	1	1	16	5	12	22	5	20	0	1	1	1	0	1	1	1	0	0	1	1
23734837	A	G	G	G	G	G	G	1	1	1	1	1	1	10	3	9	20	5	11	0	1	1	1	0	1	1	1	0	0	1	1
19478961	A	G	G	G	G	G	G	1	1	1	1	1	1	4	2	6	8	5	15	0	1	1	1	1	0	0	1	0	1	1	1
61918919	A	G	G	G	G	G	G	1	1	1	1	1	1	5	9	12	40	16	13	0	1	1	1	0	1	1	1	0	0	1	1
120279044	T	C	C	C	C	C	C	1	1	1	1	1	1	20	16	8	16	6	12	0	1	1	1	1	0	1	0	0	1	1	1
5455108	T	C	C	C	C	C	C	1	1	1	1	1	1	3	1	2	10	7	8	1	0	1	1	1	0	1	1	1	0	0	1
16910510	T	C	C	C	C	C	C	1	1	1	1	1	1	4	2	6	3	13	7	1	1	1	1	0	0	0	1	1	0	1	1
64022378	A	G	G	G	G	G	G	1	1	1	1	1	1	2	5	5	7	3	14	0	1	1	1	0	1	1	1	0	1	0	1
82485603	T	C	C	C	C	C	C	1	1	1	1	1	1	3	2	4	4	2	9	0	1	1	1	1	0	0	1	0	1	1	1
114328333	N	G	G	G	G	G	G	1	1	1	1	1	1	4	4	4	4	1	2	1	1	1	1	0	0	1	0	1	0	1	1
120214885	T	C	C	C	C	C	C	1	1	1	1	1	1	15	7	9	10	6	4	1	0	1	1	1	0	0	1	0	1	1	1
35010411	A	G	G	G	G	G	G	1	1	1	1	1	1	14	14	3	8	5	16	1	1	1	1	0	0	1	1	0	1	0	1
60806046	G	A	A	A	A	A	A	1	1	1	1	1	1	14	22	7	36	12	39	1	1	1	1	0	0	0	1	1	1	0	1
72502766	G	A	A	A	A	A	A	1	1	1	1	1	1	29	8	7	35	31	14	1	1	1	1	0	0	1	0	1	0	1	1
88642846	G	A	A	A	A	A	A	1	1	1	1	1	1	5	5	2	6	2	2	0	1	1	1	1	0	0	1	0	1	1	1
19863979	C	T	T	T	T	T	T	1	1	1	1	1	1	7	8	2	7	3	2	1	0	1	1	1	0	1	0	0	1	1	1
22709387	T	C	C	C	C	C	C	1	1	1	1	1	1	3	13	4	7	4	3	0	1	1	1	1	0	0	1	0	1	1	1
23410098	T	C	C	C	C	C	C	1	1	1	1	1	1	19	15	4	7	7	9	0	1	1	1	0	1	0	1	0	1	1	1
104157911	A	G	G	G	G	G	G	1	1	1	1	1	1	7	3	11	21	2	5	1	0	1	1	1	0	1	1	0	1	0	1
32928308	A	G	G	G	G	G	G	1	1	1	1	1	1	9	4	4	8	4	6	0	1	1	1	1	0	0	1	0	1	1	1
50576898	C	T	T	T	T	T	T	1	1	1	1	1	1	10	2	5	12	9	10	1	1	1	1	0	0	0	1	0	1	1	1
69978301	C	T	T	T	T	T	T	1	1	1	1	1	1	15	6	6	4	11	6	0	1	1	1	0	1	0	1	0	1	1	1
4005052	A	G	G	G	G	G	G	1	1	1	1	1	1	2	5	2	2	2	12	0	1	1	1	0	1	1	0	0	1	1	1
11966634	T	C	C	C	C	C	C	1	1	1	1	1	1	14	3	4	4	4	2	0	1	1	1	0	1	0	1	0	1	1	1
78295875	T	C	C	C	C	C	C	1	1	1	1	1	1	5	7	5	4	5	5	1	0	1	1	1	0	0	1	1	1	0	1
102793832	C	A	A	A	A	A	A	1	1	1	1	1	1	5	3	7	4	11	24	1	0	1	1	1	0	1	1	0	0	1	1
122338009	A	G	G	G	G	G	G	1	1	1	1	1	1	13	7	11	2	5	4	0	1	1	1	1	0	1	0	0	1	1	1
90029682	A	G	G	G	G	G	G	1	1	1	1	1	1	27	18	6	11	2	20	0	1	1	1	0	0	0	1	1	1	1	1
104394812	A	G	G	G	G	G	G	1	1	1	1	1	1	5	10	7	9	17	8	0	1	1	0	1	0	1	1	0	1	1	1
104394814	T	C	C	C	C	C	C	1	1	1	1	1	1	5	10	7	9	18	8	0	1	1	0	1	0	1	1	0	1	1	1
104394903	A	G	G	G	G	G	G	1	1	1	1	1	1	5	5	5	10	5	5	0	1	1	0	1	0	1	1	0	1	1	1
104395094	A	G	G	G	G	G	G	1	1	1	1	1	1	9	9	5	6	9	4	0	1	1	1	0	0	1	1	1	1	0	1
104395103	T	C	C	C	C	C	C	1	1	1	1	1	1	9	9	4	5	13	5	0	1	1	1	0	0	1	1	1	1	0	1
104395107	A	G	G	G	G	G	G	1	1	1	1	1	1	9	9	4	5	13	5	0	1	1	1	0	0	1	1	1	1	0	1
105883574	N	C	C	C	C	C	C	1	1	1	1	1	1	7	6	7	9	2	9	0	1	1	1	0	0	1	1	0	1	1	1
39657111	A	T	T	T	T	T	T	1	1	1	1	1	1	11	8	12	9	7	5	0	0	1	1	1	0	1	1	0	1	1	1
59100808	A	G	G	G	G	G	G	1	1	1	1	1	1	12	12	12	24	5	16	0	1	1	1	0	0	1	1	0	1	1	1
38349475	C	G	G	G	G	G	G	1	1	1	1	1	1	3	2	4	8	2	4	0	0	1	1	1	0	1	1	0	1	1	1
42515564	G	A	A	A	A	A	A	1	1	1	1	1	1	8	3	6	6	11	2	0	1	1	1	0	0	1	1	0	1	1	1
43258253	G	C	C	C	C	C	C	1	1	1	1	1	1	4	2	8	21	11	16	0	1	1	0	1	0	1	1	0	1	1	1
750158	A	C	C	C	C	C	C	1	1	1	1	1	1	4	10	6	9	7	5	0	1	1	1	0	0	1	1	0	1	1	1
21513563	C	T	T	T	T	T	T	1	1	1	1	1	1	24	4	3	2	2	5	0	0	1	1	1	0	1	1	0	1	1	1
21513577	T	C	C	C	C	C	C	1	1	1	1	1	1	25	5	3	2	2	5	0	0	1	1	1	0	1	1	0	1	1	1
65603692	T	C	C	C	C	C	C	1	1	1	1	1	1	5	3	6	14	7	7	0	0	1	1	0	1	0	1	1	1	1	1
63651988	A	G	G	G	G	G	G	1	1	1	1	1	1	5	9	8	11	12	2	0	0	1	1	0	1	1	1	0	1	1	1
119945974	T	C	C	C	C	C	C	1	1	1	1	1	1	5	7	3	2	2	8	0	0	1	1	1	0	1	0	1	1	1	1
121289034	T	G	G	G	G	G	G	1	1	1	1	1	1	8	8	6	5	4	4	0	1	1	1	0	0	0	1	1	1	1	1
130780804	C	T	T	T	T	T	T	1	1	1	1	1	1	8	2	6	12	4	6	0	0	1	1	0	1	1	1	1	0	1	1
31649254	A	G	G	G	G	G	G	1	1	1	1	1	1	5	16	5	10	7	17	0	0	1	1	0	1	1	1	1	0	1	1
20321477	T	A	A	A	A	A	A	1	1	1	1	1	1	15	5	2	3	7	8	0	1	1	1	0	0	0	1	1	1	1	1
23583888	G	C	C	C	C	C	C	1	1	1	1	1	1	2	4	4	3	3	3	1	1	0	1	0	0	1	0	1	1	1	1
48974796	A	G	G	G	G	G	G	1	1	1	1	1	1	19	5	10	7	10	3	0	1	1	0	0	1	1	1	0	1	1	1
1649317	A	G	G	G	G	G	G	1	1	1	1	1	1	3	3	4	10	4	6	1	0	1	1	0	0	1	0	1	1	1	1
27901004	A	C	C	C	C	C	C	1	1	1	1	1	1	2	5	4	2	3	2	1	1	0	0	1	0	1	1	0	1	1	1
26099116	G	C	C	C	C	C	C	1	1	1	1	1	1	8	5	5	7	2	8	0	1	1	0	0	1	1	1	0	1	1	1
7037137	C	T	T	T	T	T	T	1	1	1	1	1	1	16	12	6	21	3	4	0	1	0	1	0	1	1	0	1	1	1	1
90305157	T	G	G	G	G	G	G	1	1	1	1	1	1	2	2	6	17	4	12	1	0	0	1	1	0	1	0	1	1	1	1
119671520	G	A	A	A	A	A	A	1	1	1	1	1	1	4	2	3	9	4	3	1	1	1	0	0	0	1	0	1	1	1	1
9372071	T	C	C	C	C	C	C	1	1	1	1	1	1	16	19	7	32	15	19	0	0	1	1	0	1	1	1	0	1	1	1
9372106	A	G	G	G	G	G	G	1	1	1	1	1	1	15	13	3	15	11	4	0	0	1	1	0	1	1	1	0	1	1	1
9372107	C	T	T	T	T	T	T	1	1	1	1	1	1	14	13	3	14	11	6	0	0	1	1	0	1	1	1	0	1	1	1
99696462	T	C	C	C	C	C	C	1	1	1	1	1	1	9	6	9	13	9	6	0	0	1	1	1	0	1	1	0	1	1	1
59964556	C	G	G	G	G	G	G	1	1	1	1	1	1	28	24	60	108	14	68	1	1	0	1	0	0	1	0	1	1	1	1
51439448	A	C	C	C	C	C	C	1	1	1	1	1	1	6	6	2	4	3	2	1	0	0	1	0	1	1	1	1	1	0	1
54858056	A	G	G	G	G	G	G	1	1	1	1	1	1	4	2	3	9	8	8	0	0	1	1	0	1	1	1	0	1	1	1
89376552	G	C	C	C	C	C	C	1	1	1	1	1	1	6	9	10	10	4	2	0	0	1	1	0	1	1	0	1	1	1	1
103773627	C	G	G	G	G	G	G	1	1	1	1	1	1	13	26	14	40	7	13	0	1	0	1	0	1	0.5	0.5	1	1	1	1
69769204	A	G	G	G	G	G	G	1	1	1	1	1	1	3	2	5	4	4	3	0	0	1	1	0	1	0	1	1	1	1	1
69769207	T	C	C	C	C	C	C	1	1	1	1	1	1	3	2	5	4	4	3	0	0	1	1	0	1	0	1	1	1	1	1
67734649	T	G	G	G	G	G	G	1	1	1	1	1	1	9	12	7	2	19	11	0	1	1	0	1	0	1	1	0	1	1	1
23409077	C	A	A	A	A	A	A	1	1	1	1	1	1	2	2	8	5	7	4	1	1	0	1	0	0	1	1	0	1	1	1
40075681	A	G	G	G	G	G	G	1	1	1	1	1	1	9	2	2	7	7	2	1	0	1	1	0	0	1	1	1	0	1	1
73141960	C	T	T	T	T	T	T	1	1	1	1	1	1	9	2	2	5	7	5	1	0	1	0	0	0	1	1	1	1	1	1
60352144	T	A	A	A	A	A	A	1	1	1	1	1	1	3	2	8	5	6	4	0	1	1	0	0	0	1	1	1	1	1	1
60352184	C	T	T	T	T	T	T	1	1	1	1	1	1	3	2	8	5	6	4	0	1	1	0	0	0	1	1	1	1	1	1
60352187	G	C	C	C	C	C	C	1	1	1	1	1	1	3	2	8	5	6	4	0	1	1	0	0	0	1	1	1	1	1	1
60352189	G	A	A	A	A	A	A	1	1	1	1	1	1	3	2	8	5	6	4	0	1	1	0	0	0	1	1	1	1	1	1
60352222	G	C	C	C	C	C	C	1	1	1	1	1	1	3	2	7	5	6	4	0	1	1	0	0	0	1	1	1	1	1	1
15078997	A	G	G	G	G	G	G	1	1	1	1	1	1	16	9	3	4	7	16	0	1	0	1	0	0	1	1	1	1	1	1
15527291	A	G	G	G	G	G	G	1	1	1	1	1	1	9	9	7	4	2	4	0	0	0	1	1	0	1	1	1	1	1	1
107071315	T	C	C	C	C	C	C	1	1	1	1	1	1	18	2	3	4	13	12	0	1	1	0	0	0	1	1	1	1	1	1
118179514	G	A	A	A	A	A	A	1	1	1	1	1	1	33	17	13	22	15	14	0	1	0	0	0	1	1	1	1	1	1	1
71440970	C	T	T	T	T	T	T	1	1	1	1	1	1	6	3	7	8	5	2	0	0	0	1	0	1	1	1	1	1	1	1
103879035	T	A	A	A	A	A	A	1	1	1	1	1	1	29	8	4	7	5	3	0	0	1	1	1	1	1	1	1	0	1	0
54297082	G	A	A	A	A	A	A	1	1	1	1	1	1	21	20	19	22	8	21	1	0	1	1	1	1	1	1	0	1	0	0
18129860	G	A	A	A	A	A	A	1	1	1	1	1	1	13	5	2	6	4	5	0	1	1	1	1	1	0	1	1	1	0	0
84839260	A	C	C	C	C	C	C	1	1	1	1	1	1	7	13	5	13	19	7	0	1	1	1	1	1	1	1	0	1	0	0
84839261	A	G	G	G	G	G	G	1	1	1	1	1	1	7	12	5	13	19	6	0	1	1	1	1	1	1	1	0	1	0	0
6117105	T	C	C	C	C	C	C	1	1	1	1	1	1	4	2	8	29	9	38	0	1	1	1	1	1	1	1	0	1	0	0
42750213	A	G	G	G	G	G	G	1	1	1	1	1	1	7	5	4	3	3	2	0	1	1	1	1	1	0	1	1	1	0	0
10635525	T	C	C	C	C	C	C	1	1	1	1	1	1	26	20	5	28	15	6	0	1	1	1	1	1	1	0	0	1	1	0
22115063	A	G	G	G	G	G	G	1	1	1	1	1	1	4	3	11	16	2	9	0	1	1	1	1	1	0	1	0	1	1	0
23314759	A	G	G	G	G	G	G	1	1	1	1	1	1	23	22	12	8	19	6	0	1	1	1	1	1	0	0	1	1	1	0
23323674	G	C	C	C	C	C	C	1	1	1	1	1	1	22	25	15	20	12	19	0	1	1	1	1	1	0	0	1	1	1	0
56993891	G	A	A	A	A	A	A	1	1	1	1	1	1	2	3	16	28	6	7	1	0	1	0	1	1	1	1	1	0	1	0
116197177	G	A	A	A	A	A	A	1	1	1	1	1	1	17	7	3	16	11	6	1	1	1	1	1	1	0	0	0	1	1	0
136719529	C	T	T	T	T	T	T	1	1	1	1	1	1	4	5	6	26	4	5	0	1	0	1	1	1	1	1	0	1	1	0
17609412	A	G	G	G	G	G	G	1	1	1	1	1	1	10	11	6	19	15	11	1	1	1	1	1	1	0	0	0	1	1	0
59604661	C	T	T	T	T	T	T	1	1	1	1	1	1	36	8	3	14	11	3	1	0	1	0	1	1	1	0	1	1	1	0
18146390	T	C	C	C	C	C	C	1	1	1	1	1	1	3	8	7	10	12	12	0	1	1	1	1	1	1	0	0	1	1	0
29491106	C	T	T	T	T	T	T	1	1	1	1	1	1	10	3	5	13	3	10	0	1	1	0	1	1	1	0	1	1	1	0
13771733	C	T	T	T	T	T	T	1	1	1	1	1	1	3	4	2	6	4	14	0	0	1	0	1	1	1	1	1	1	1	0
13771829	C	T	T	T	T	T	T	1	1	1	1	1	1	7	3	2	6	4	12	0	0	1	1	1	1	0	1	1	1	1	0
18565714	T	C	C	C	C	C	C	1	1	1	1	1	1	23	5	10	31	9	22	0	1	1	1	1	1	0	1	1	0	1	0
45780155	A	G	G	G	G	G	G	1	1	1	1	1	1	4	10	7	4	10	6	0	1	1	1	1	1	1	1	1	0	0	0
45780158	A	G	G	G	G	G	G	1	1	1	1	1	1	4	10	7	4	10	6	0	1	1	1	1	1	1	1	1	0	0	0
72592309	A	T	T	T	T	T	T	1	1	1	1	1	1	9	13	19	18	4	14	0	1	0	1	1	1	1	1	0	1	1	0
89528274	T	C	C	C	C	C	C	1	1	1	1	1	1	5	4	7	11	4	4	0	0	1	1	1	1	1	1	0	1	1	0
117320572	A	G	G	G	G	G	G	1	1	1	1	1	1	13	7	5	12	13	12	0	1	1	1	1	1	1	0	1	1	0	0
1341031	A	G	G	G	G	G	G	1	1	1	1	1	1	6	9	2	8	5	12	0	1	1	1	1	1	1	0	0	1	1	0
8977574	A	T	T	T	T	T	T	1	1	1	1	1	1	18	10	12	8	12	11	0	0	1	1	1	1	0	1	1	1	1	0
15102657	G	T	T	T	T	T	T	1	1	1	1	1	1	2	12	4	9	4	3	0	0	0	1	1	1	1	1	1	1	1	0
52147458	G	C	C	C	C	C	C	1	1	1	1	1	1	9	2	2	1	4	4	0	1	1	1	1	1	1	0	0	1	1	0
52147470	T	C	C	C	C	C	C	1	1	1	1	1	1	9	2	2	2	4	3	0	1	1	1	1	1	1	0	0	1	1	0
52147478	A	G	G	G	G	G	G	1	1	1	1	1	1	9	2	2	2	4	3	0	1	1	1	1	1	1	0	0	1	1	0
90756712	A	G	G	G	G	G	G	1	1	1	1	1	1	7	4	27	41	40	216	0	1	1	1	1	1	0	1	0	1	1	0
2889110	A	G	G	G	G	G	G	1	1	1	1	1	1	11	10	9	16	4	9	1	0	1	1	1	1	0	1	0	1	1	0
55426488	T	C	C	C	C	C	C	1	1	1	1	1	1	33	26	23	39	39	51	1	1	1	1	1	1	0	0	0	1	1	0
9993032	C	T	T	T	T	T	T	1	1	1	1	1	1	8	11	18	21	7	2	0	0	1	1	1	1	1	0	1	0	1	1
15718262	T	C	C	C	C	C	C	1	1	1	1	1	1	12	13	14	9	4	5	1	1	1	1	1	1	0	1	0	0	0	1
15718288	C	G	G	G	G	G	G	1	1	1	1	1	1	12	15	15	11	4	6	1	1	1	0	1	1	1	1	0	0	0	1
70824643	A	G	G	G	G	G	G	1	1	1	1	1	1	7	28	20	20	9	30	1	1	1	1	1	1	1	0	0	0	0	1
10573309	A	G	G	G	G	G	G	1	1	1	1	1	1	5	4	2	6	2	3	0	0	1	0	1	1	1	1	1	0	1	1
19624437	N	T	T	T	T	T	T	1	1	1	1	1	1	2	7	13	16	7	7	1	0	1	1	1	1	0	0	1	1	0	1
8368164	T	C	C	C	C	C	C	1	1	1	1	1	1	2	4	3	3	7	7	0	0	1	1	1	1	1	1	1	0	0	1
9661361	G	C	C	C	C	C	C	1	1	1	1	1	1	5	13	3	6	9	8	0	1	1	1	1	1	1	0	1	0	0	1
55922445	A	G	G	G	G	G	G	1	1	1	1	1	1	7	5	4	12	3	7	0	1	0	1	1	1	1	1	0	1	0	1
55922451	G	T	T	T	T	T	T	1	1	1	1	1	1	7	5	3	12	3	7	0	1	0	1	1	1	1	1	0	1	0	1
55922481	C	A	A	A	A	A	A	1	1	1	1	1	1	7	5	4	13	3	6	0	1	0	1	1	1	1	1	0	1	0	1
64327842	G	T	T	T	T	T	T	1	1	1	1	1	1	9	5	15	22	4	25	0	0	1	1	1	1	0	0	1	1	1	1
77543720	G	A	A	A	A	A	A	1	1	1	1	1	1	9	4	10	11	2	29	0	0	0	0	1	1	1	1	1	1	1	1
77543757	A	G	G	G	G	G	G	1	1	1	1	1	1	10	6	10	11	2	34	0	0	0	0	1	1	1	1	1	1	1	1
6035273	A	G	G	G	G	G	G	1	1	1	1	1	1	11	2	13	4	6	28	1	0	1	1	1	1	1	0	1	0	0.571429	0.428571
15812989	G	A	A	A	A	A	A	1	1	1	1	1	1	10	4	4	11	3	16	0	0	1	1	1	1	0	1	0	1	1	1
750263	G	C	C	C	C	C	C	1	1	1	1	1	1	2	9	5	3	9	6	0	1	1	1	1	1	1	0	0	0	1	1
750269	T	C	C	C	C	C	C	1	1	1	1	1	1	2	9	5	3	9	6	0	1	1	1	1	1	1	0	0	0	1	1
28834928	A	G	G	G	G	G	G	1	1	1	1	1	1	50	4	6	28	11	14	0	0	1	1	1	1	1	0	0	1	1	1
55727084	N	A	A	A	A	A	A	1	1	1	1	1	1	7	3	3	6	2	2	0	1	0	1	1	1	0	1	0	1	1	1
64416149	C	T	T	T	T	T	T	1	1	1	1	1	1	2	6	3	12	2	2	0	1	1	0	1	1	1	1	1	0	0	1
23929329	T	C	C	C	C	C	C	1	1	1	1	1	1	12	16	4	5	2	12	1	0	1	1	1	1	1	0	0	1	0	1
59706443	T	C	C	C	C	C	C	1	1	1	1	1	1	41	20	5	13	16	15	0	1	1	0	1	1	1	0	0	1	1	1
59706490	A	G	G	G	G	G	G	1	1	1	1	1	1	45	20	8	23	17	16	0	1	1	0	1	1	1	0	0	1	1	1
63199647	T	C	C	C	C	C	C	1	1	1	1	1	1	6	10	4	20	6	11	0	1	1	1	1	1	1	0	0	1	0	1
5520302	G	A	A	A	A	A	A	1	1	1	1	1	1	4	8	6	28	11	12	0	1	1	0	1	1	0	1	1	0	1	1
5520662	A	G	G	G	G	G	G	1	1	1	1	1	1	8	2	5	12	3	7	0	0	1	1	1	1	0	1	0	1	1	1
15198386	A	T	T	T	T	T	T	1	1	1	1	1	1	6	11	10	12	4	33	0	0	1	1	1	1	0	1	1	0	1	1
15198534	G	C	C	C	C	C	C	1	1	1	1	1	1	6	7	10	23	3	29	0	0	1	1	1	1	0	0	1	1	1	1
15198554	C	T	T	T	T	T	T	1	1	1	1	1	1	9	7	8	19	2	26	0	0	1	1	1	1	0	0	1	1	1	1
40580681	A	G	G	G	G	G	G	1	1	1	1	1	1	7	2	8	11	5	5	0	1	1	0	1	1	0	1	0	1	1	1
40580695	A	G	G	G	G	G	G	1	1	1	1	1	1	7	2	8	11	6	7	0	1	1	0	1	1	0	1	0	1	1	1
42569744	T	C	C	C	C	C	C	1	1	1	1	1	1	12	9	5	11	2	12	0	0	1	0	1	1	0	1	1	1	1	1
119911768	T	G	G	G	G	G	G	1	1	1	1	1	1	2	5	7	11	3	69	1	0	0	1	1	1	0	0	1	1	1	1
119911788	G	C	C	C	C	C	C	1	1	1	1	1	1	2	4	10	13	3	81	1	0	0	1	1	1	0	0	1	1	1	1
119911839	C	T	T	T	T	T	T	1	1	1	1	1	1	2	7	8	6	4	69	1	0	0	1	1	1	0	0	1	1	1	1
127746544	C	G	G	G	G	G	G	1	1	1	1	1	1	2	2	6	13	11	5	0	1	1	1	1	1	1	0	0	0	1	1
131131536	T	C	C	C	C	C	C	1	1	1	1	1	1	17	12	4	25	15	4	0	0	1	1	1	1	1	0	0	1	1	1
41767501	T	A	A	A	A	A	A	1	1	1	1	1	1	12	9	7	13	7	3	0	1	1	1	1	1	1	0	0	0	1	1
41767510	G	A	A	A	A	A	A	1	1	1	1	1	1	12	9	7	14	7	3	0	1	1	1	1	1	1	0	0	0	1	1
41767545	G	A	A	A	A	A	A	1	1	1	1	1	1	15	7	9	23	8	3	0	1	1	1	1	1	1	0	0	0	1	1
58055274	A	G	G	G	G	G	G	1	1	1	1	1	1	6	16	7	7	4	8	0	0	1	1	1	1	1	1	0	1	0	1
36062759	G	C	G	G	G	G	G	1	1	1	1	1	1	3	2	3	8	8	8	0	0	1	1	1	1	0	1	0	1	1	1
711752	T	C	C	C	C	C	C	1	1	1	1	1	1	17	10	6	3	9	7	0	1	1	1	1	1	0	0	0	1	1	1
711753	G	A	A	A	A	A	A	1	1	1	1	1	1	16	8	5	3	9	6	0	1	1	1	1	1	0	0	0	1	1	1
711771	A	G	G	G	G	G	G	1	1	1	1	1	1	12	7	7	3	12	9	0	1	1	1	1	1	0	0	0	1	1	1
158061	T	C	C	C	C	C	C	1	1	1	1	1	1	8	3	12	15	7	9	0.272727	0	0	0	0.727273	1	1	1	1	1	1	1
25434393	N	T	T	T	T	T	T	1	1	1	1	1	1	5	2	7	3	3	14	0	1	1	1	1	1	0	1	0	1	0	1
33844619	T	C	C	C	C	C	C	1	1	1	1	1	1	4	9	8	10	4	3	0	0	1	1	1	1	0	1	1	0	1	1
1538332	T	A	A	A	A	A	A	1	1	1	1	1	1	7	7	4	6	3	2	1	0	1	1	1	1	1	0	0	1	0	1
3159622	C	T	T	T	T	T	T	1	1	1	1	1	1	2	2	10	6	10	9	0	1	1	1	1	1	0	0	0	1	1	1
23734617	T	C	C	C	C	C	C	1	1	1	1	1	1	57	42	40	88	34	70	0	1	1	1	1	1	1	0	0	0	1	1
117320698	A	T	T	T	T	T	T	1	1	1	1	1	1	3	7	4	10	8	12	0	1	1	1	1	1	0	0	0	1	1	1
117320707	T	C	C	C	C	C	C	1	1	1	1	1	1	3	7	4	8	7	12	0	1	1	1	1	1	0	0	0	1	1	1
117320710	A	G	G	G	G	G	G	1	1	1	1	1	1	3	7	4	8	7	12	0	1	1	1	1	1	0	0	0	1	1	1
117320711	C	T	T	T	T	T	T	1	1	1	1	1	1	3	6	4	8	7	12	0	1	1	1	1	1	0	0	0	1	1	1
9371755	A	T	T	T	T	T	T	1	1	1	1	1	1	6	9	7	5	28	32	0	1	1	1	1	1	1	0	0	1	0	1
39114777	T	C	C	C	C	C	C	1	1	1	1	1	1	4	5	3	3	3	2	0	1	1	1	1	1	0	1	0	1	0	1
39114799	T	C	C	C	C	C	C	1	1	1	1	1	1	4	5	3	2	2	2	0	1	1	1	1	1	0	1	0	1	0	1
39114824	C	A	A	A	A	A	A	1	1	1	1	1	1	4	5	3	2	2	2	0	1	1	1	1	1	0	1	0	1	0	1
119316935	T	C	C	C	C	C	C	1	1	1	1	1	1	19	10	5	5	4	4	0	1	0	1	1	1	1	1	0	0	1	1
84233903	A	G	G	G	G	G	G	1	1	1	1	1	1	4	2	6	14	6	2	1	0	1	1	1	1	1	1	0	0	0	1
35100998	C	G	G	G	G	G	G	1	1	1	1	1	1	4	2	10	9	3	4	1	1	1	1	1	1	0	1	0	0	0	1
35101045	C	G	G	G	G	G	G	1	1	1	1	1	1	5	6	8	4	3	3	1	1	0	1	1	1	0	1	0	1	0	1
461949	T	C	C	C	C	C	C	1	1	1	1	1	1	5	8	2	18	11	11	1	0	1	0	1	1	1	1	0	0	1	1
53353402	A	G	G	G	G	G	G	1	1	1	1	1	1	3	3	19	18	5	8	1	0	1	0	1	1	0	0	1	1	1	1
88423098	G	A	A	A	A	A	A	1	1	1	1	1	1	21	4	7	16	6	3	0	1	1	1	1	1	0	1	0	0	1	1
32928142	T	C	C	C	C	C	C	1	1	1	1	1	1	4	5	19	19	2	4	1	0	0	1	1	1	0	1	1	0	1	1
32928145	G	A	A	A	A	A	A	1	1	1	1	1	1	4	6	20	17	2	4	1	0	0	1	1	1	0	1	1	0	1	1
32928176	G	T	T	T	T	T	T	1	1	1	1	1	1	9	6	21	25	4	5	1	0	0	1	1	1	0	1	1	0	1	1
32928178	G	A	A	A	A	A	A	1	1	1	1	1	1	9	7	21	25	4	5	1	0	0	1	1	1	0	1	1	0	1	1
81238074	T	C	C	C	C	C	C	1	1	1	1	1	1	6	12	2	4	9	4	0	1	1	1	1	1	1	0	1	0	0	1
9100750	G	A	A	A	A	A	A	1	1	1	1	1	1	12	13	3	13	7	12	0	0	1	0	1	1	1	1	0	1	1	1
50718951	T	A	A	A	A	A	A	1	1	1	1	1	1	9	9	3	4	19	15	0	1	1	1	1	1	0	1	0	1	0	1
102794267	A	C	C	C	C	C	C	1	1	1	1	1	1	9	7	3	7	4	9	1	0	1	1	1	1	0	1	0	0	1	1
105238452	A	G	G	G	G	G	G	1	1	1	1	1	1	13	6	7	19	2	4	0	0	1	1	1	1	1	0	0	1	1	1
9842561	T	C	C	C	C	C	C	1	1	1	1	1	1	22	15	15	40	31	26	0	1	0.272727	0.333333	1	0.6	1	0.545455	1	0.666667	0.583333	1
26710422	C	G	G	G	G	G	G	1	1	1	1	1	1	16	7	11	10	4	13	1	1	1	1	1	1	0	0.615385	0.857143	0	0	0.529412
6808891	A	G	G	G	G	G	G	1	1	1	1	1	1	4	13	18	24	5	31	0	1	0	0.571429	1	1	1	1	0.5	0.333333	0.6	1
39738275	T	C	C	C	C	C	C	1	1	1	1	1	1	34	35	4	14	30	16	0	1	1	1	1	1	0.545455	0	1	0	0.461538	1
11050854	C	T	T	T	T	T	T	1	1	1	1	1	1	17	11	5	20	21	26	0	0.888889	1	0.8	1	1	1	0.444444	0	0.466667	0.411765	1
14747394	T	C	A	C	C	C	C	1	1	1	1	1	1	26	2	22	27	13	34	1	1	0.4	0.666667	1	0.5	0.538462	1	0	0.363636	0.545455	1
4539475	T	C	C	C	C	C	C	1	1	1	1	1	1	6	5	4	8	3	6	1	0	1	0.571429	1	1	1	1	0	1	0	0.444444
14905940	T	C	C	C	C	C	C	1	1	1	1	1	1	30	2	6	15	14	18	0.642857	1	1	1	1	0.428571	1	1	0	0.5	0	0.444444
21011608	C	T	T	T	T	T	T	1	1	1	1	1	1	77	15	15	33	57	41	1	1	0.971429	1	1	0.625	0	1	0	0.466667	0.65	0.307692
35535216	A	G	G	G	G	G	G	1	1	1	1	1	1	21	34	3	12	13	16	0.266667	1	0.571429	1	1	1	0	0.333333	1	1	0.444444	0.407407
30557703	A	G	G	G	G	G	G	1	1	1	1	1	1	18	21	11	22	13	27	1	1	1	0.956522	1	1	1	0	0	0	0.571429	0.5
44081436	T	C	C	C	C	C	C	1	1	1	1	1	1	7	6	11	16	6	8	0	1	1	1	0.571429	0	1	0.4	1	0.285714	0.777778	1
46943514	A	G	G	G	G	G	G	1	1	1	1	1	1	13	10	12	26	9	10	0.636364	1	1	1	0	0.4	0.5	1	1	1	0.5	0
109019350	G	A	A	A	A	A	A	1	1	1	1	1	1	15	4	11	4	5	4	0	0.4	1	1	1	1	1	0	0	0.636364	1	1
6165688	T	G	G	G	G	G	G	1	1	1	1	1	1	9	16	14	28	4	32	0.6	1	0	0.230769	0.714286	0.947368	1	1	0	1	0.55	1
112308274	G	A	A	A	A	A	A	1	1	1	1	1	1	13	45	49	34	6	27	0	0.333333	1	1	1	0.510638	0.4	1	1	1	0.285714	0.515152
75680318	T	C	C	C	C	C	C	1	1	1	1	1	1	10	11	4	7	6	9	0	1	1	1	0.333333	0	0	1	1	0.714286	1	1
44397610	A	G	G	G	G	G	G	1	1	1	1	1	1	9	4	8	2	3	2	0	0.75	0	0.5	0	1	1	0.8	1	1	1	1
71765537	A	G	G	G	G	G	G	1	1	1	1	1	1	46	37	16	14	22	11	0.625	1	1	1	1	0.608696	1	0.6	0	0.647059	0.576923	0
32191564	A	G	G	G	G	G	G	1	1	1	1	1	1	4	2	4	4	6	29	1	0	0	1	1	0.466667	1	1	0.6	0	1	1
15239865	T	C	C	C	C	C	C	1	1	1	1	1	1	11	14	22	20	8	26	0.857143	0	0	0.714286	0	0.5	1	1	1	1	1	1
62342104	T	C	C	C	C	C	C	1	1	1	1	1	1	9	2	7	8	5	3	0	0	0	1	1	1	0.75	1	1	1	0.571429	0.75
25110138	T	G	G	G	G	G	G	1	1	1	1	1	1	2	8	15	28	15	10	1	1	1	1	1	1	1	0.666667	0	0	0	0.411765
52349007	C	A	A	A	A	A	A	1	1	1	1	1	1	92	24	36	55	36	82	0	1	1	1	1	1	1	0.538462	0	0.294118	0.25	1
52349007	C	A	A	A	A	A	A	1	1	1	1	1	1	92	24	36	55	36	82	0	1	1	1	1	1	1	0.538462	0	0.294118	0.25	1
3737261	C	T	T	T	T	T	T	1	1	1	1	1	1	13	18	14	10	3	10	1	0.571429	0.916667	1	1	1	1	0	0.333333	0	1	0.272727
35166550	G	C	C	C	C	C	C	1	1	1	1	1	1	6	4	3	8	5	3	1	1	1	1	1	0	0	1	0	0.5	0.6	1
34536916	A	G	G	G	G	G	G	1	1	1	1	1	1	15	12	4	7	3	2	0	1	0.75	1	1	1	0.5	1	0	0.454545	1	0.4
6971110	A	G	G	G	G	G	G	1	1	1	1	1	1	175	89	96	227	114	195	1	0.985714	1	1	0.661538	0.489796	0	0.484848	1	0.464789	0.40678	0.61194
101977403	T	C	C	C	C	C	C	1	1	1	1	1	1	28	20	24	25	8	11	0.296296	1	0.285714	0.724138	0	1	0.35	1	1	1	0.45	1
46567853	G	A	A	A	A	A	A	1	1	1	1	1	1	10	9	6	11	8	5	0	1	1	1	0	0.666667	1	0.444444	0	1	1	1
10795174	G	A	A	A	A	A	A	1	1	1	1	1	1	20	10	10	13	6	55	0	1	1	1	1	1	1	0.434783	0	0.484848	0.444444	0.75
6970664	G	T	T	T	T	T	T	1	1	1	1	1	1	248	117	134	274	146	382	1	1	1	1	0.608696	0.505618	0	0.479167	1	0.377049	0.512195	0.632653
34719945	C	A	A	A	A	A	A	1	1	1	1	1	1	36	33	25	20	29	32	1	1	1	1	1	1	0	0	0.454545	0.666667	1	0
11050855	C	G	G	G	G	G	G	1	1	1	1	1	1	16	10	5	19	25	29	0	1	1	0.8	1	1	1	0.444444	0	0.466667	0.411765	1
25846465	C	G	G	G	G	G	G	1	1	1	1	1	1	26	3	10	8	20	3	1	1	1	1	0	1	0.5	0.333333	1	0.3	0	1
4049906	A	G	G	G	G	G	G	1	1	1	1	1	1	251	205	103	203	143	144	1	1	1	1	1	0.988889	1	0.52439	0	0.627119	0	0
6078968	G	A	A	A	A	A	A	1	1	1	1	1	1	10	5	40	41	3	50	0.833333	1	0.666667	0.615385	0.756757	1	0.535714	1	0	1	0.235294	0.5
33223549	G	A	A	A	A	A	A	1	1	1	1	1	1	10	17	5	4	3	6	0	1	0.9	1	1	1	0.75	0.35	0.692308	0	0.702703	0.75
85208750	A	G	G	G	G	G	G	1	1	1	1	1	1	21	24	25	42	29	75	0	0.5	0.75	0.5	0	1	1	1	0.8	0.6	1	1
104004574	G	A	A	A	A	A	A	1	1	1	1	1	1	43	29	18	31	19	32	1	1	1	0.380952	1	1	0.515152	0.392857	0.384615	1	0.482759	0
34808308	T	A	A	A	A	A	A	1	1	1	1	1	1	28	32	11	20	35	31	1	1	1	1	1	1	0.4	0.545455	0.6	0	0.615385	0
66769812	C	T	T	T	T	T	T	1	1	1	1	1	1	31	6	15	11	5	24	1	1	0.666667	1	0.5	0	0	1	0	1	1	1
24650680	A	G	G	G	G	G	G	1	1	1	1	1	1	3	7	8	6	3	7	0	1	1	1	0	1	0.666667	0	1	0.5	1	1
111186636	C	T	T	T	T	T	T	1	1	1	1	1	1	9	23	8	21	11	8	1	1	1	0.5	0.866667	1	1	0	0	1	0	0.8
13366149	C	T	T	T	T	T	T	1	1	1	1	1	1	5	5	18	12	3	9	0.833333	0.428571	0.769231	0.636364	1	0.5	0	1	1	0.444444	1	0.555556
1314679	T	C	C	C	C	C	C	1	1	1	1	1	1	45	26	23	23	11	12	0.25	1	1	0.913043	1	1	0.4	0.357143	1	0.45	0.8	0
6041262	T	G	G	G	G	G	G	1	1	1	1	1	1	7	17	39	64	27	106	0	1	1	1	1	0.933333	1	0.647059	1	0	0.305556	0.285714
21223515	G	C	C	C	C	C	C	1	1	1	1	1	1	27	48	16	24	14	19	0.647059	1	1	1	0	0.393939	1	0.761905	0.421053	0.482759	1	0.465517
35969796	C	T	T	T	T	T	T	1	1	1	1	1	1	30	9	18	37	12	24	0	0	1	1	1	0.8	1	1	0	1	0.375	1
83249869	T	C	C	C	C	C	C	1	1	1	1	1	1	7	2	4	14	3	12	1	0	1	1	0	1	1	1	1	0	1	0.176471
90321745	A	G	G	G	G	G	G	1	1	1	1	1	1	10	2	18	13	5	4	1	1	1	1	0	0.75	0	0.333333	1	0.6	0.5	1
39193301	A	G	G	G	G	G	G	1	1	1	1	1	1	64	36	37	42	38	32	1	0.427184	1	1	1	1	0.45	0	0.555556	0.374302	0.378947	1
37860954	G	A	A	A	A	A	A	1	1	1	1	1	1	33	52	33	57	36	58	0.647059	1	0.9375	0	0.857143	0	1	1	0.565217	0.181818	1	1
121070600	T	C	C	C	C	C	C	1	1	1	1	1	1	20	11	3	12	20	12	0	1	1	1	1	1	1	0	0	0.75	0.444444	1
42460566	C	T	T	T	T	T	T	1	1	1	1	1	1	28	38	27	52	8	35	1	0.666667	1	1	1	0.454545	0	1	0.555556	0.333333	1	0.1875
43529861	T	C	C	C	C	C	C	1	1	1	1	1	1	8	19	4	14	9	6	1	0	1	1	0	0	1	1	0.8	0.4	1	1
46565073	G	A	A	A	A	A	A	1	1	1	1	1	1	15	22	11	28	4	9	0.666667	1	1	1	0.2	0.333333	1	0	0	1	1	1
11050856	A	G	G	G	G	G	G	1	1	1	1	1	1	18	11	5	19	25	28	0	1	1	0.8	1	1	1	0.5	0	0.466667	0.4375	1
48829490	G	T	T	T	T	T	T	1	1	1	1	1	1	20	34	20	20	14	19	0	0	1	1	1	1	0.5	0.533333	1	1	0.777778	0.4
33037727	C	T	T	T	T	T	T	1	1	1	1	1	1	24	18	24	29	17	32	1	1	1	1	1	1	0	1	0.444444	0.777778	0	0
27155565	A	G	G	G	G	G	G	1	1	1	1	1	1	91	91	44	128	45	100	0	1	0	0	1	1	0.866667	0.818182	0.7	0.839286	1	1
36211338	A	G	G	G	G	G	G	1	1	1	1	1	1	53	44	32	38	40	15	1	0.529412	1	1	1	1	0.377358	0	0.517241	0.28	0.52381	1
49051963	T	C	C	C	C	C	C	1	1	1	1	1	1	8	18	8	13	4	7	0	0.833333	1	0.4	1	0	1	1	1	0	1	1
116344839	A	G	G	G	G	G	G	1	1	1	1	1	1	18	43	8	7	9	12	1	1	1	1	0.181818	1	0	0.5	1	0.555556	1	0
71843676	T	A	A	A	A	A	A	1	1	1	1	1	1	148	13	5	39	7	4	1	1	1	1	1	1	0.54	0	1	0.344828	0	0.352941
33036511	T	A	A	A	A	A	A	1	1	1	1	1	1	69	10	46	37	30	24	1	0.970588	0.979592	1	1	1	0	1	0.166667	0.644068	0.477273	0
29921154	G	A	A	A	A	A	A	1	1	1	1	1	1	46	26	50	41	23	22	1	0	0.72	0.931034	1	1	0.413793	0.653846	1	0.521739	1	0
28699386	T	C	C	C	C	C	C	1	1	1	1	1	1	119	75	63	109	63	112	1	1	1	1	1	0.980769	0.36	0.305556	1	0	0.595238	0
60566192	C	G	G	G	G	G	G	1	1	1	1	1	1	12	8	9	6	15	27	1	0.25	1	1	0	1	1	0	0	1	1	1
23347013	A	G	G	G	G	G	G	1	1	1	1	1	1	31	20	3	32	13	18	0	1	1	1	1	1	0	0.25	1	1	1	0
51854686	T	C	C	C	C	C	C	1	1	1	1	1	1	24	26	7	6	13	12	0	1	1	1	1	1	0	0.25	0	1	1	1
6118108	G	A	A	A	A	A	A	1	1	1	1	1	1	10	10	9	19	21	73	0	1	0	1	0.5	1	1	1	0	1	0.75	1
1794722	G	C	C	C	C	C	C	1	1	1	1	1	1	44	29	19	47	21	35	1	1	1	1	1	1	0.347826	1	0	0.26087	0.647059	0
70214984	C	T	T	T	T	T	T	1	1	1	1	1	1	6	6	2	6	4	23	1	1	1	1	1	0.666667	0.375	0.375	0	0.416667	1	0.428571
43605953	C	T	T	T	T	T	T	1	1	1	1	1	1	24	24	6	12	17	5	1	1	1	1	1	1	0.416667	0	0	0.846154	1	0
14198518	G	A	A	A	A	A	A	1	1	1	1	1	1	19	5	19	20	38	34	0	1	1	1	1	0	0.5	0.25	1	1	0.517241	1
13985510	T	C	C	C	C	C	C	1	1	1	1	1	1	15	8	10	13	7	6	1	1	1	1	1	1	0	0.285714	0	0.583333	0.571429	0.833333
33039000	C	T	T	T	T	T	T	1	1	1	1	1	1	92	36	79	93	47	117	1	1	1	1	1	1	0	1	0.327273	0.425532	0.529412	0
111186604	T	C	C	C	C	C	C	1	1	1	1	1	1	8	15	3	25	10	7	1	1	1	0.5	0.875	1	1	0	0	1	0	0.909091
24889045	T	C	C	C	C	C	C	1	1	1	1	1	1	260	182	112	188	137	122	1	0.5	1	0.548387	0.991597	0.491329	1	0.556886	0.56338	0.634021	0	1
62339012	C	G	G	G	G	G	G	1	1	1	1	1	1	11	6	14	13	2	9	1	1	1	0	0	1	1	1	1	1	0.285714	0
60566196	A	C	C	C	C	C	C	1	1	1	1	1	1	15	7	9	6	14	26	1	0.285714	1	1	0	1	1	0	0	1	1	1
68468282	T	C	C	C	C	C	C	1	1	1	1	1	1	15	6	2	4	4	4	1	1	1	0.285714	1	1	1	1	1	0	0	0
115596814	C	G	G	G	G	G	G	1	1	1	1	1	1	32	28	8	31	22	8	0	1	1	1	1	1	0	0.222222	0.666667	1	1	0.4
1794356	T	C	C	C	C	C	C	1	1	1	1	1	1	46	51	13	35	28	29	1	1	1	1	1	1	0.483871	1	0	0.34	0.465116	0
60933828	G	A	A	A	A	A	A	1	1	1	1	1	1	28	14	21	55	4	124	1	1	0	0.1875	1	0.75	1	1	0	1	1	0.361111
46943399	G	T	T	T	T	T	T	1	1	1	1	1	1	24	17	15	42	21	7	1	1	1	1	0	0.25	0.266667	1	1	1	0.782609	0
101107784	A	G	G	G	G	G	G	1	1	1	1	1	1	14	4	2	3	12	10	1	0.5	1	0	0	0.8	1	1	0	1	1	1
72020602	A	G	G	G	G	G	G	1	1	1	1	1	1	43	18	19	29	13	10	1	1	0.484848	1	1	1	0.555556	1	0.730769	0	0	0.533333
122030275	C	T	T	T	T	T	T	1	1	1	1	1	1	15	35	24	30	12	22	1	0.333333	1	0.933333	1	0.421053	0	0.52381	0.521739	1	1	0.576923
71833415	T	C	C	C	C	C	C	1	1	1	1	1	1	113	6	34	20	11	2	1	1	1	1	1	1	0.535316	0	1	0.430464	0	0.352941
8470683	T	A	A	A	A	A	A	1	1	1	1	1	1	43	27	23	43	13	22	1	1	1	1	0	1	1	0	1	0.714286	0	0.615385
38857466	G	A	A	A	A	A	A	1	1	1	1	1	1	38	4	11	10	14	21	1	1	0.333333	1	0	1	1	0	0	1	1	1
2230932	T	G	G	G	G	G	G	1	1	1	1	1	1	15	18	8	9	5	7	0	1	1	1	1	0	1	1	0.333333	1	0	1
44751706	G	T	T	T	T	T	T	1	1	1	1	1	1	2	3	7	8	2	6	1	0	0.333333	1	0	0	1	1	1	1	1	1
58058817	G	A	A	A	A	A	A	1	1	1	1	1	1	17	8	4	9	6	6	1	1	1	0	1	1	1	1	0	1	0.333333	0
5470558	T	C	C	C	C	C	C	1	1	1	1	1	1	10	3	2	6	7	2	0	1	1	1	1	1	1	0	0	1	0.333333	1
77542985	T	C	C	C	C	C	C	1	1	1	1	1	1	9	13	11	13	12	34	0	1	0	0.333333	1	1	1	1	0	1	1	1
80661927	C	T	T	T	T	T	T	1	1	1	1	1	1	2	18	3	3	2	10	0.5	0	1	1	1	1	0	1	1	1	0	0.833333
31842032	C	T	T	T	T	T	T	1	1	1	1	1	1	29	8	13	10	14	17	0	1	0.785714	1	0.444444	0.909091	0.2	1	1	0	1	1
6042945	G	C	C	C	C	C	C	1	1	1	1	1	1	12	14	7	30	14	27	1	1	0	1	1	1	1	0.5	1	0	0.444444	0.4
90060277	T	G	G	G	G	G	G	1	1	1	1	1	1	2	7	6	2	4	4	0	1	1	1	0.6	0	1	1	0	0.75	1	1
14788912	G	A	A	A	A	A	A	1	1	1	1	1	1	37	17	14	36	39	3	0.692308	1	1	1	0	0.333333	0.6	0.727273	1	1	0	1
26810995	A	G	G	G	G	G	G	1	1	1	1	1	1	224	126	90	176	120	67	0.412698	1	1	0.511628	1	1	1	0.435294	0	0	1	1
35535454	T	C	C	C	C	C	C	1	1	1	1	1	1	51	34	15	26	10	22	0.444444	1	0.652174	1	1	1	0	0.4	1	1	0.444444	0.423077
49215267	C	T	T	T	T	T	T	1	1	1	1	1	1	81	93	64	107	50	48	1	1	1	1	1	0.382353	0.5625	0	0.981982	0	0.4375	1
9819616	A	G	G	G	G	G	G	1	1	1	1	1	1	16	13	17	33	11	22	0.333333	0	1	0.5625	0.461538	0.416667	1	0.590909	1	1	1	1
25435543	A	G	G	G	G	G	G	1	1	1	1	1	1	20	12	19	5	16	4	0.25	1	0	0.411765	0.578947	1	0.625	1	1	1	1	0.5
42569917	C	T	T	T	T	T	T	1	1	1	1	1	1	68	24	23	57	49	54	1	1	1	1	0.458333	0.542857	1	1	0.35	0.489362	0.526316	0
14789055	G	A	A	A	A	A	A	1	1	1	1	1	1	92	42	10	34	48	34	0.75	1	1	1	0	0.392857	0.454545	0.771429	1	1	0	1
44047200	A	G	G	G	G	G	G	1	1	1	1	1	1	16	8	5	6	9	21	1	1	1	1	0	0.4	1	0.636364	1	0	0.833333	0.5
21013442	T	C	C	C	C	C	C	1	1	1	1	1	1	60	46	8	35	34	34	1	1	1	1	1	0.5	0	1	0.4	0.333333	0.666667	0.470588
25846278	G	C	C	C	C	C	C	1	1	1	1	1	1	235	31	24	20	39	17	1	1	1	1	1	1	0	0.188679	0	0.183673	1	1
3300613	T	C	C	C	C	C	C	1	1	1	1	1	1	93	58	63	91	79	47	0	1	1	1	1	1	0.966667	0	1	0.461538	0.277778	0.666667
50909340	A	G	G	G	G	G	G	1	1	1	1	1	1	29	19	5	12	19	15	0	1	1	0.636364	1	0.666667	1	0.571429	0	0.5	1	1
15158001	C	A	A	A	A	A	A	1	1	1	1	1	1	3	3	7	5	6	5	0	0	0	0.875	1	0.5	1	1	1	1	1	1
120918563	G	A	A	A	A	A	A	1	1	1	1	1	1	75	133	75	159	87	113	1	0.52	1	1	1	0.5	1	0	0.666667	0.447059	0.244898	1
10496937	G	A	A	A	A	A	A	1	1	1	1	1	1	35	46	42	50	28	28	1	1	0.410256	1	1	1	1	0	0.5	0.473684	0	1
61354815	T	C	C	C	C	C	C	1	1	1	1	1	1	40	20	4	15	25	7	1	1	1	1	0.875	0.368421	0.535714	0.818182	0.5	1	0.3	0
59112171	T	C	C	C	C	C	C	1	1	1	1	1	1	19	53	22	32	3	49	1	0	0.5	0	1	1	1	1	1	1	0.466667	0.431034
11050558	C	T	T	T	T	T	T	1	1	1	1	1	1	31	17	9	24	20	28	0	1	1	1	1	1	1	0.666667	0	0.315789	0.416667	1
11050025	T	C	C	C	C	C	C	1	1	1	1	1	1	46	6	20	31	17	39	0	1	1	1	1	1	1	0.75	0	0.285714	0.363636	1
90060265	T	C	C	C	C	C	C	1	1	1	1	1	1	3	7	6	2	4	5	0	1	1	1	0.6	0	1	1	0	0.8	1	1
90060270	C	T	T	T	T	T	T	1	1	1	1	1	1	2	7	6	2	4	5	0	1	1	1	0.6	0	1	1	0	0.8	1	1
154442861	C	T	T	T	T	T	T	1	1	1	1	1	1	10	12	3	10	5	17	1	0	1	1	0	0	1	1	1	0.4	1	1
14788868	G	C	C	C	C	C	C	1	1	1	1	1	1	44	20	22	40	44	30	0.761905	1	1	1	0	0.380952	0.545455	0.714286	1	1	0	1
40961776	C	T	T	T	T	T	T	1	1	1	1	1	1	34	38	37	40	10	35	0.909091	0.8	0.6875	0.461538	0.461538	1	0.833333	0.5	0.692308	0.363636	1	0.7
3354561	T	C	C	C	C	C	C	1	1	1	1	1	1	12	4	2	6	2	6	0	1	0	0.636364	1	1	1	0.777778	1	1	0	1
73442633	T	C	C	C	C	C	C	1	1	1	1	1	1	47	65	13	40	46	14	1	1	1	0	1	0	1	1	0	1	1	0.416667
78756810	A	G	G	G	G	G	G	1	1	1	1	1	1	12	10	6	14	10	6	0	1	1	1	0	1	1	1	0	0.666667	0.75	1
48027954	C	G	G	G	G	G	G	1	1	1	1	1	1	35	52	23	17	26	18	1	1	0	1	0.363636	0.227273	1	1	0.703704	0.647059	1	0.47619
65264389	A	C	C	C	C	C	C	1	1	1	1	1	1	5	6	14	16	4	19	0.6875	0	1	1	1	1	0.857143	1	0	0.875	0	1
37849828	A	G	G	G	G	G	G	1	1	1	1	1	1	23	19	10	8	9	18	0	1	1	0.153846	0.666667	0	1	1	1	0.6	1	1
44964870	T	C	C	C	C	C	C	1	1	1	1	1	1	6	6	9	23	11	22	1	0.333333	1	0.6	1	1	1	0.380952	0.8	0.307692	0	1
6040136	G	A	A	A	A	A	A	1	1	1	1	1	1	27	20	18	54	35	62	1	1	1	1	1	1	1	0.714286	0	0	0.333333	0.375
14789118	C	G	G	G	G	G	G	1	1	1	1	1	1	51	33	5	22	40	31	0.886364	1	0.987013	1	0	0.44	0.444444	0.666667	1	1	0	1
20852755	G	A	A	A	A	A	A	1	1	1	1	1	1	14	14	6	10	5	10	1	1	1	1	1	1	0.428571	0	0	1	1	0
21017309	A	G	G	G	G	G	G	1	1	1	1	1	1	44	38	13	35	20	14	1	1	1	1	1	0.363636	0	0.956522	0.384615	0.533333	0.615385	0.580645
14788875	C	T	T	T	T	T	T	1	1	1	1	1	1	44	22	22	46	45	26	0.807692	1	1	1	0	0.347826	0.567568	0.714286	1	1	0	1
64256748	T	C	C	C	C	C	C	1	1	1	1	1	1	24	7	5	2	8	2	0	1	0.833333	0.666667	0	1	0.571429	0.9	1	0.571429	0.9	1
101626753	A	G	G	G	G	G	G	1	1	1	1	1	1	27	12	2	14	16	10	1	1	1	1	1	1	1	0	0	1	0.444444	0
98023851	T	C	C	C	C	C	C	1	1	1	1	1	1	13	11	14	26	5	6	0	1	1	1	1	1	1	0	0	1	0.518519	0.928571
72252709	G	C	C	C	C	C	C	1	1	1	1	1	1	13	8	9	10	13	7	1	1	1	1	0	1	0.454545	1	0	1	1	0
71190296	T	C	C	C	C	C	C	1	1	1	1	1	1	12	7	2	5	4	29	0	0	1	1	0.8	1	0.714286	1	0	1	1	0.96
112122075	C	G	G	G	G	G	G	1	1	1	1	1	1	27	24	24	21	17	14	1	1	0.4375	0.586207	1	1	1	0.625	0.733333	0	0.772727	0.32
49373713	A	T	T	T	T	T	T	1	1	1	1	1	1	51	19	38	53	9	27	1	1	1	1	1	1	0.424242	0.439394	0.428571	0.307692	0.375	0.5
76179405	A	G	G	G	G	G	G	1	1	1	1	1	1	69	66	26	100	48	113	1	0	0.409836	1	0.25974	0.982143	1	0.46875	0.888889	0.468085	1	1
28261754	T	C	C	C	C	C	C	1	1	1	1	1	1	27	33	8	22	19	8	0	0.857143	1	1	1	1	0.666667	0.625	0	0.333333	1	1
5414390	G	A	A	A	A	A	A	1	1	1	1	1	1	9	5	7	10	3	3	1	1	1	0.4375	0.464286	1	1	0	0.636364	0.6	1	0.346154
80264880	A	G	G	G	G	G	G	1	1	1	1	1	1	8	7	5	13	3	2	1	0	1	1	1	1	1	0.444444	1	0.6	0	0.444444
53391446	C	T	T	T	T	T	T	1	1	1	1	1	1	10	15	8	18	18	40	1	0.75	0.590909	1	0.888889	1	0.333333	0	0.75	0.722222	0.454545	1
44468436	T	C	C	C	C	C	C	1	1	1	1	1	1	8	2	4	5	6	2	1	0.615385	1	1	0	1	1	0	1	0.875	0	1
77897469	C	T	T	T	T	T	T	1	1	1	1	1	1	242	263	269	391	167	280	1	0.576271	1	0.432432	1	1	1	0	0	1	0.482759	1
2112702	G	A	A	A	A	A	A	1	1	1	1	1	1	20	4	8	29	9	11	1	1	0.923077	0.571429	1	1	0	0	1	1	1	0
43004367	T	C	C	C	C	C	C	1	1	1	1	1	1	98	41	19	43	38	14	1	0.372093	0.465116	1	1	1	1	0	0.65625	0.604651	0.4	1
15297967	T	C	C	C	C	C	C	1	1	1	1	1	1	11	13	25	27	5	7	1	1	1	1	1	0	0.5	0	1	1	1	0
3794768	T	C	C	C	C	C	C	1	1	1	1	1	1	32	15	5	2	8	3	0	0.5	1	1	0	1	1	0	1	1	1	1
110147085	A	C	C	C	C	C	C	1	1	1	1	1	1	15	11	2	6	7	5	0	1	1	1	0	0.5	0	1	1	1	1	1
3287785	A	T	T	T	T	T	T	1	1	1	1	1	1	16	2	7	17	4	20	0.5	1	0	0	0	1	1	1	1	1	1	1
6037860	T	C	C	C	C	C	C	1	1	1	1	1	1	3	5	19	28	16	16	1	1	1	1	1	1	1	0	1	0	0.5	0
10878806	T	C	C	C	C	C	C	1	1	1	1	1	1	7	17	2	3	7	3	0.5	1	0	1	1	1	0	1	1	1	1	0
1340992	G	A	A	A	A	A	A	1	1	1	1	1	1	5	6	2	8	4	9	0	1	1	1	1	1	1	0.5	0	1	1	0
1341035	A	G	G	G	G	G	G	1	1	1	1	1	1	6	9	2	8	5	12	0	1	1	1	1	1	1	0.5	0	1	1	0
54079265	A	G	G	G	G	G	G	1	1	1	1	1	1	10	15	6	9	3	6	1	1	1	1	1	1	0.5	0	0	1	0	1
20444229	G	C	C	C	C	C	C	1	1	1	1	1	1	23	6	3	11	5	4	0	1	1	1	1	0.5	0	1	0	1	1	1
64539644	T	C	C	C	C	C	C	1	1	1	1	1	1	12	17	7	33	4	14	0	1	1	1	1	0.5	1	1	0	1	0	1
111186704	G	A	A	A	A	A	A	1	1	1	1	1	1	2	19	8	31	16	8	1	1	1	0.666667	1	1	1	0	0	1	0	0.833333
45556241	G	A	A	A	A	A	A	1	1	1	1	1	1	5	14	23	35	5	17	1	0	1	1	1	1	0.555556	0.708333	0	0.52381	0.714286	1
47640845	T	C	C	C	C	C	C	1	1	1	1	1	1	13	10	12	34	2	13	1	1	1	1	1	1	0.8125	0.4	0.545455	0.75	0	0
47185164	T	G	G	G	G	G	G	1	1	1	1	1	1	6	12	4	5	10	6	1	1	0.25	0.909091	1	0	0.6	0.75	1	1	0	1
6115230	A	G	G	G	G	G	G	1	1	1	1	1	1	19	14	56	82	33	73	0	1	0.625	0.5	0.884615	1	1	1	0	1	0.5	1
62502128	T	C	C	C	C	C	C	1	1	1	1	1	1	89	68	33	62	73	50	1	0.369565	0.43038	0	1	1	1	0.348837	0.363636	1	1	1
67827803	A	G	G	G	G	G	G	1	1	1	1	1	1	12	12	6	9	6	20	0.928571	0.666667	1	0.6	1	1	0	0.625	1	0.5	0.571429	0.625
110169699	A	G	G	G	G	G	G	1	1	1	1	1	1	51	34	20	47	19	31	0	1	1	0.980392	0.6	0.4375	0.5	1	0	1	1	1
70505406	A	G	G	G	G	G	G	1	1	1	1	1	1	57	40	38	68	32	54	1	1	0.658537	0.733333	1	1	0.5	1	1	0	0	0.626667
9090931	A	G	G	G	G	G	G	1	1	1	1	1	1	26	19	26	39	24	48	0.666667	1	0	0.5	1	0	0.352941	1	1	1	1	1
108210001	A	G	G	G	G	G	G	1	1	1	1	1	1	14	15	22	39	33	43	1	1	1	1	0.925926	1	0.517241	0.230769	0.875	0	0.555556	0.416667
14789235	G	A	A	A	A	A	A	1	1	1	1	1	1	107	43	8	39	33	28	0.85	1	1	1	0	0.475	0.4	0.797101	1	1	0	1
76405027	A	G	G	G	G	G	G	1	1	1	1	1	1	40	39	57	70	7	148	1	1	0	0.430303	0.533333	1	1	1	0.558824	1	0	1
136682951	T	C	C	C	C	C	C	1	1	1	1	1	1	31	29	7	15	14	27	0	1	1	1	0	0	1	1	0.833333	1	1	0.692308
30489377	T	C	C	C	C	C	C	1	1	1	1	1	1	27	22	55	47	5	23	1	1	1	1	0.478873	1	0.575758	1	0	0	1	0.478261
107577470	G	C	C	C	C	C	C	1	1	1	1	1	1	29	21	18	26	24	31	1	0.333333	1	1	1	1	1	0.2	1	0	0	1
46127162	T	C	C	C	C	C	C	1	1	1	1	1	1	10	6	2	2	8	3	0	0	1	1	1	1	1	1	1	0	0.538462	1
46152345	A	G	G	G	G	G	G	1	1	1	1	1	1	1535	1281	438	729	785	745	1	0.999102	0.999188	1	1	0.998573	0	1	0	0	0.542504	1
104125572	G	C	C	C	C	C	C	1	1	1	1	1	1	23	10	20	14	5	27	1	0	1	0.75	0.666667	1	1	0	1	1	0.555556	0.571429
46323295	G	T	T	T	T	T	T	1	1	1	1	1	1	11	4	5	22	4	13	0	1	1	1	1	1	0.75	1	1	0.333333	0	0.461538
106791772	A	G	G	G	G	G	G	1	1	1	1	1	1	36	15	3	13	29	7	0	1	1	1	1	1	0.545455	1	0	1	1	0
49219497	G	A	A	A	A	A	A	1	1	1	1	1	1	31	19	11	18	8	31	1	1	1	1	1	0.571429	0.411765	0	1	0	0.5625	1
6228821	A	C	C	C	C	C	C	1	1	1	1	1	1	8	11	2	7	6	2	0.75	1	1	1	0.8	0	1	1	0	1	0	1
35970657	T	C	C	C	C	C	C	1	1	1	1	1	1	53	22	48	61	35	69	0	0	1	1	1	0	0.75	1	1	1	0.8	1
83675393	T	C	C	C	C	C	C	1	1	1	1	1	1	21	3	3	3	5	23	0	1	1	1	1	1	0.666667	1	0	0.5	1	0.384615
63560037	A	G	G	G	G	G	G	1	1	1	1	1	1	18	10	6	7	21	2	0	1	0.666667	0.714286	1	0	0.545455	1	1	1	1	0.625
112308001	A	G	G	G	G	G	G	1	1	1	1	1	1	5	15	15	21	16	47	0	0.416667	1	1	1	0.8	0.285714	1	1	1	0.571429	0.481481
77542274	A	G	G	G	G	G	G	1	1	1	1	1	1	4	15	2	8	5	23	0	1	0	0.555556	1	1	1	1	0	1	1	1
115674755	C	T	T	T	T	T	T	1	1	1	1	1	1	2	15	3	29	4	10	0	1	1	1	1	1	1	0	0	1	0.555556	1
10535620	C	T	T	T	T	T	T	1	1	1	1	1	1	18	6	22	34	17	36	0	0.777778	1	1	1	1	1	1	0	1	0	0.777778
88129061	T	C	C	C	C	C	C	1	1	1	1	1	1	66	42	96	48	26	42	0	1	0	0.457143	0.444444	0.65625	1	1	1	1	1	1
136694816	A	G	G	G	G	G	G	1	1	1	1	1	1	21	15	13	15	5	27	0	0.809524	1	1	0.75	0	1	1	1	1	1	0
63560715	G	C	C	C	C	C	C	1	1	1	1	1	1	38	14	22	24	28	14	0.5	1	0.568966	0.434783	1	0	0.666667	1	1	1	1	0.390244
29896852	C	T	T	T	T	T	T	1	1	1	1	1	1	7	12	5	4	9	13	0	1	0	1	0.9	0.666667	1	1	0	1	1	1
37013886	A	G	G	G	G	G	G	1	1	1	1	1	1	28	4	14	10	6	7	1	1	1	1	1	1	0	0.375	0.25	0.8	1	0.142857
2434362	T	C	C	C	C	C	C	1	1	1	1	1	1	41	68	45	79	14	28	1	1	1	1	1	1	0.486486	0.515152	0	0.4	0.166667	1
11051377	T	C	C	C	C	C	C	1	1	1	1	1	1	22	12	9	26	14	22	0	1	1	1	1	1	1	0.615385	0	0.571429	0.384615	1
92439218	A	C	C	C	C	C	C	1	1	1	1	1	1	14	14	30	38	13	11	1	0	0.666667	0	1	1	0.333333	1	1	1	0.571429	1
28571409	T	C	C	C	C	C	C	1	1	1	1	1	1	15	7	15	15	14	5	0	1	1	1	1	0.777778	0.555556	0.4	0.4	0.444444	1	1
10535613	G	A	A	A	A	A	A	1	1	1	1	1	1	10	5	19	28	16	34	0	0.777778	1	1	1	1	1	1	0	1	0	0.8
10535619	G	A	A	A	A	A	A	1	1	1	1	1	1	13	6	19	25	17	34	0	0.777778	1	1	1	1	1	1	0	1	0	0.8
68115925	T	C	C	C	C	C	C	1	1	1	1	1	1	30	10	3	36	24	21	1	1	1	1	1	1	0.578947	1	1	0	0	0
91914501	G	T	T	T	T	T	T	1	1	1	1	1	1	2	5	8	14	16	25	1	1	0	1	0.681818	1	0.526316	1	0.571429	1	0.8	0
25425470	G	A	A	A	A	A	A	1	1	1	1	1	1	261	61	13	28	39	23	1	1	1	1	1	1	0.153846	0.190476	0	0.236364	1	1
27227600	A	G	G	G	G	G	G	1	1	1	1	1	1	22	10	3	26	18	34	0	0	0.75	0.692308	1	1	0.888889	0.75	0.8	0.7	1	1
17565597	G	C	C	C	C	C	C	1	1	1	1	1	1	13	10	8	11	5	6	0	0.181818	1	1	1	1	1	1	0	0.4	1	1
84809312	T	C	C	C	C	C	C	1	1	1	1	1	1	9	2	2	12	7	2	0	1	1	1	0	1	0.75	1	0	1	1	0.833333
57311351	G	A	A	A	A	A	A	1	1	1	1	1	1	19	11	6	12	2	5	0	1	1	1	1	1	0.571429	1	0	0.518519	0.5	1
46155321	G	C	C	C	C	C	C	1	1	1	1	1	1	5	14	14	14	13	11	1	1	1	1	1	1	0	1	0	0	0.594595	1
37861597	A	G	G	G	G	G	G	1	1	1	1	1	1	36	37	44	99	39	76	0.708333	1	1	0	0.617647	0	1	1	0.921053	0.347826	1	1
77533833	T	C	C	C	C	C	C	1	1	1	1	1	1	2	11	9	21	7	12	0	1	1	0.666667	1	0.928571	1	0	0	1	1	1
84535608	G	C	C	C	C	C	C	1	1	1	1	1	1	12	12	7	16	6	7	1	1	0	1	1	1	0.666667	1	0	0.555556	0.375	1
4774750	C	G	G	G	G	G	G	1	1	1	1	1	1	275	162	79	216	153	97	1	1	0.378788	1	0.555556	1	0.380531	1	0	1	0.283333	1
98834126	G	A	A	A	A	A	A	1	1	1	1	1	1	2	3	5	18	4	4	0.6	1	1	1	1	0.9	1	1	0.357143	0.333333	0	0.409091
32362306	T	C	C	C	C	C	C	1	1	1	1	1	1	6	11	5	11	4	4	0.8	0	1	1	0	1	0	1	1	1	1	0.8
90060228	C	G	G	G	G	G	G	1	1	1	1	1	1	5	8	4	2	4	4	0	1	1	1	0.8	0	1	1	0	0.8	1	1
30059084	T	C	C	C	C	C	C	1	1	1	1	1	1	3	13	11	7	4	5	0	0	1	1	1	0	0.6	1	1	1	1	1
75902130	T	C	C	C	C	C	C	1	1	1	1	1	1	3	3	4	16	3	10	0	1	1	1	1	0.6	1	1	0	1	0	1
36878080	A	G	G	G	G	G	G	1	1	1	1	1	1	7	19	7	2	2	5	0	1	1	1	1	1	0	1	0	1	0.6	1
70239442	T	G	G	G	G	G	G	1	1	1	1	1	1	4	2	6	7	5	8	0	1	1	1	1	1	0.6	0	0	1	1	1
146521025	T	C	C	C	C	C	C	1	1	1	1	1	1	33	21	3	15	15	37	0.833333	1	0.578947	0.55	1	0	1	0.3125	0.857143	1	1	0.470588
63560505	G	C	C	C	C	C	C	1	1	1	1	1	1	27	26	14	18	32	17	0.72	1	0.446809	0.357143	1	0	0.452381	1	1	1	1	0.633333
17040652	T	C	C	C	C	C	C	1	1	1	1	1	1	23	7	6	10	5	16	1	1	1	0.947368	1	1	0.466667	0.6	0.6	0	0	1
60978870	A	G	G	G	G	G	G	1	1	1	1	1	1	24	11	19	17	5	13	1	1	1	1	1	1	1	0.272727	0.344828	0	0	1
35970689	A	T	T	T	T	T	T	1	1	1	1	1	1	59	28	49	63	32	66	0	0	1	1	1	0	0.8	1	1	1	0.823529	1
333508	C	T	T	T	T	T	T	1	1	1	1	1	1	11	5	6	12	5	3	0	1	1	1	1	1	1	1	0	0.625	0	1
77542279	C	G	G	G	G	G	G	1	1	1	1	1	1	4	17	2	8	5	24	0	1	0	0.625	1	1	1	1	0	1	1	1
9928651	A	G	G	G	G	G	G	1	1	1	1	1	1	12	9	8	21	6	16	1	1	1	1	1	1	1	0	0	0	0.625	1
32178359	T	C	C	C	C	C	C	1	1	1	1	1	1	3	9	10	21	3	14	0	1	1	1	1	1	0	0	1	1	1	0.625
86851168	T	C	C	C	C	C	C	1	1	1	1	1	1	9	6	5	3	2	8	0	1	1	0.75	1	0	0.692308	0.538462	0.8	0.846154	1	1
14789196	T	C	C	C	C	C	C	1	1	1	1	1	1	67	46	11	45	29	46	0.901639	1	0.985507	1	0	0.575758	0.375	0.790323	1	1	0	1
25186361	T	C	C	C	C	C	C	1	1	1	1	1	1	25	42	18	49	32	23	0	1	1	0.538462	1	1	0.181818	1	1	0.45	1	0.458333
56680137	A	G	G	G	G	G	G	1	1	1	1	1	1	73	48	18	33	49	14	0.555556	1	1	0.421053	0.777778	0.444444	1	0.96	0	1	0.473684	1
90060227	A	G	G	G	G	G	G	1	1	1	1	1	1	5	8	4	2	4	4	0	1	1	1	0.8	0	1	1	0	0.833333	1	1
54204302	C	G	G	G	G	G	G	1	1	1	1	1	1	17	7	7	5	2	5	0	1	1	0.8	1	1	0	1	0	1	1	0.833333
63901179	T	C	C	C	C	C	C	1	1	1	1	1	1	18	12	3	9	8	4	0	0.333333	1	1	1	1	0.3	1	0	1	1	1
58092153	A	G	G	G	G	G	G	1	1	1	1	1	1	121	22	9	37	12	40	0	0	1	1	1	1	0.857143	1	1	1	0.777778	0
[truncated: 8,208 more rows]
