# Supplementary material for: Single nucleotide polymorphism discovery in bovine liver using RNA-seq technology
Source: PLoS One. 2017 Feb 24;12(2):e0172687. doi: 10.1371/journal.pone.0172687 (PMC5325534; doi:10.1371/journal.pone.0172687)
Supplement: S31 Table — (XLSX) [file pone.0172687.s031.xlsx]

## Sheet: 5.100% =10>
S31 Table: SNPs filtering data set with a minimum depth of 10 SNP reads that support the polymorphic nucleotide base and SNP ratio = 100% of Polish Red breed.
LOCUS	REF	CP 19	CP 20	CP 21	CP 22	CP 23	CP 24	SNP% CP19	SNP% CP20	SNP% CP21	SNP% CP22	SNP% CP23	SNP% CP24	READS CP19	READS CP20	READS CP21	READS CP22	READS CP23	READS CP24	SNP% CP27	SNP% CP28	SNP% CP29	SNP% CP30	SNP% CP31	SNP% CP32	SNP% CP35	SNP% CP36	SNP% CP37	SNP% CP38	SNP% CP39	SNP% CP40
60195938	G	A	A	A	A	A	A	1	1	1	1	1	1	31	28	14	24	18	23	0	0	0	0	0	0	1	0	0	0	0	0
60195652	A	T	T	T	T	T	T	1	1	1	1	1	1	32	14	31	61	18	16	0	0	0	0	0	0.181818	1	0	0	0	0	0
32450833	N	T	T	T	T	T	T	1	1	1	1	1	1	35	41	224	20	28	20	0	1	0	0	0	0	0	0	0	0	1	0
24794001	A	G	G	G	G	G	G	1	1	1	1	1	1	26	19	16	12	18	30	0	0.416667	0.238095	0	0.833333	0.533333	0	0	0	0	0	0
7926333	N	T	T	T	T	T	T	1	1	1	1	1	1	64	94	35	79	47	29	0	1	0	0	1	0	0	1	0	0	0	0
63446561	T	C	C	C	C	C	C	1	1	1	1	1	1	20	47	22	79	98	80	0	1	0	0	1	0	0	1	0	0	0	0
37989408	C	G	G	G	G	G	G	1	1	1	1	1	1	165	167	110	248	124	134	0	0.428571	0.984496	0	0.54386	0	1	0	0	0	0	0.431579
67364847	T	C	C	C	C	C	C	1	1	1	1	1	1	33	31	33	22	19	13	0.444444	1	0.414634	0.431818	0	0	0	0.516129	0.692308	0	0	0
82342597	A	G	G	G	G	G	G	1	1	1	1	1	1	27	15	18	22	17	16	0	1	0	0.833333	0.5	0	0.230769	0	0	0.454545	0	0.5
48870063	G	A	A	A	A	A	A	1	1	1	1	1	1	25	17	22	22	11	11	1	0	0	0.285714	1	1	0	0	0.666667	0	0	0
38560527	T	C	C	C	C	C	C	1	1	1	1	1	1	34	95	85	133	137	330	0	1	1	1	0	0	0	1	0	0	0	0
60620106	G	T	T	T	T	T	T	1	1	1	1	1	1	48	39	42	44	20	11	0	0	1	1	0	1	0	0	0	0	0	1
31738259	C	T	T	T	T	T	T	1	1	1	1	1	1	27	24	26	32	26	20	1	0	0.727273	0	0.416667	0.428571	0.5	0	0.6875	0	0	0.384615
78647143	T	G	G	G	G	G	G	1	1	1	1	1	1	25	23	25	46	27	54	0	0	0	0.457143	0	0	0	1	0.7	1	1	0
78647198	C	G	G	G	G	G	G	1	1	1	1	1	1	39	31	34	55	24	53	0	0	0	0.464286	0	0	0	1	0.777778	1	1	0
845495	T	C	C	C	C	C	C	1	1	1	1	1	1	41	32	21	48	48	28	0.8125	0.571429	0	0.225806	1	1	0.380952	0	0	0	0	0.28125
39199048	G	A	A	A	A	A	A	1	1	1	1	1	1	24	32	47	49	15	19	0	0	1	0	0	1	0.4	0	1	1	0	0
71417606	C	A	A	A	A	A	A	1	1	1	1	1	1	25	25	21	34	31	39	0	0.5	0.357143	0.121951	0.857143	0	1	0	0	0.571429	0	1
71417646	A	G	G	G	G	G	G	1	1	1	1	1	1	27	33	32	55	41	51	0	0.5	0.517241	0	0.75	0	1	0	0	0.47619	0.166667	1
60612973	C	T	T	T	T	T	T	1	1	1	1	1	1	101	71	41	53	44	52	0.488372	0.222222	1	0.9	0.916667	0	0	0	0	0	0	1
22391171	G	C	C	C	C	C	C	1	1	1	1	1	1	126	84	62	79	37	97	0.457627	0.45283	1	0.622642	1	1	0	0	0	0	0	0
7895208	G	A	A	A	A	A	A	1	1	1	1	1	1	24	13	24	21	11	16	1	1	0.3	0.461538	1	0.5	0	0	0	0.363636	0	0
846528	A	C	C	C	C	C	C	1	1	1	1	1	1	103	110	35	59	79	45	0.52809	0.526316	0	0.424242	1	1	0.631579	0	0	0	0	0.528846
845738	G	A	A	A	A	A	A	1	1	1	1	1	1	98	36	19	33	53	56	0.842105	0.509091	0	0.566667	1	0.935484	0.487179	0	0	0	0	0.375
845828	C	G	G	G	G	G	G	1	1	1	1	1	1	92	48	25	36	77	48	0.64	0.539474	0	0.508772	1	1	0.512821	0	0	0	0	0.625
40963384	T	C	C	C	C	C	C	1	1	1	1	1	1	35	45	29	48	19	29	0	0.428571	0.421053	0.486486	0	1	0	0.545455	0	0.545455	1	0.411765
846426	C	T	T	T	T	T	T	1	1	1	1	1	1	79	110	23	49	72	28	0.571429	0.607595	0	0.557692	1	1	0.534483	0	0	0	0	0.580645
70495488	G	T	T	T	T	T	T	1	1	1	1	1	1	33	79	68	208	169	241	0	0.923077	0	1	1	1	0	1	0	0	0	0
60604119	T	C	C	C	C	C	C	1	1	1	1	1	1	136	92	36	38	62	23	0	0.477273	1	1	1	0.45	0	0	0	0	0	1
13804937	C	T	T	T	T	T	T	1	1	1	1	1	1	26	12	18	13	27	10	0	1	0.931034	1	1	1	0	0	0	0	0	0
60604118	A	G	G	G	G	G	G	1	1	1	1	1	1	135	95	37	37	63	23	0	0.477273	1	1	1	0.473684	0	0	0	0	0	1
16229	A	G	G	G	G	G	G	1	1	1	1	1	1	59	45	63	115	49	65	0	1	0	0	1	0	1	0	0	1	0	1
63387673	A	G	G	G	G	G	G	1	1	1	1	1	1	30	168	62	123	259	332	0	1	0	1	1	1	0	1	0	0	0	0
60604166	A	G	G	G	G	G	G	1	1	1	1	1	1	152	96	28	49	80	38	0.285714	0.292683	1	1	1	0.473684	0	0	0	0	0	1
22825214	C	G	G	G	G	G	G	1	1	1	1	1	1	207	135	177	181	48	83	0	0.469388	0	0	0	0.453488	0.580645	0.604938	1	0.522523	0.569231	1
24972085	G	A	A	A	A	A	A	1	1	1	1	1	1	91	85	76	55	70	104	0	0.466667	1	0.5625	0	1	0	0.637255	0.55102	0.54717	0.441176	0
71529501	C	T	T	T	T	T	T	1	1	1	1	1	1	65	38	25	42	22	31	0.392857	1	0	0.45098	0.538462	0.322581	1	0.526316	0	0.516129	0.484848	0
22825200	G	T	T	T	T	T	T	1	1	1	1	1	1	194	138	169	180	49	87	0	0.510638	0	0	0	0.442857	0.575342	0.622517	1	0.514286	0.571429	1
60619631	G	A	A	A	A	A	A	1	1	1	1	1	1	122	52	64	124	47	59	0.444444	0.5	1	1	1	0.454545	0	0	0	0	0	1
44081076	T	C	C	C	C	C	C	1	1	1	1	1	1	15	15	10	13	16	25	0	0.285714	1	1	0	0.7	1	1	0	0	0.428571	0
40963482	G	A	A	A	A	A	A	1	1	1	1	1	1	34	21	26	33	13	40	0	0.538462	0.769231	0.387097	0	1	0.6	0.6	0	0.538462	1	0
50328289	C	T	T	T	T	T	T	1	1	1	1	1	1	34	29	24	16	18	40	0	0	0	0.272727	0.4375	0.5	0.3	1	0.9	0.666667	0.357143	1
71416318	T	G	G	G	G	G	G	1	1	1	1	1	1	44	77	77	90	44	47	0.294118	0.64	0.508197	0	0.615385	0	1	0	0.384615	0.481481	0.535714	1
20644864	T	C	C	C	C	C	C	1	1	1	1	1	1	51	61	45	40	29	43	1	0.366667	0.965517	0.388889	0	1	0	0.594595	0	0.518519	0	0.631579
15928631	T	C	C	C	C	C	C	1	1	1	1	1	1	13	27	20	24	25	21	1	1	0	0.642857	0	0.608696	0.4375	0.5	0.285714	0	0	1
15927831	T	C	C	C	C	C	C	1	1	1	1	1	1	27	23	22	13	12	18	1	1	0	0.625	0	0.32	0.6	0.545455	0.4	0	0	1
40962973	T	C	C	C	C	C	C	1	1	1	1	1	1	60	34	11	19	25	33	0	0.434783	0.692308	0.510638	0	1	0	0.888889	0	0.5625	1	0.428571
71420482	T	G	G	G	G	G	G	1	1	1	1	1	1	75	83	52	80	58	34	0.416667	0.348837	1	0.53	0.377358	0.314815	1	0.52809	0	0.622222	0.455556	0
71416176	G	A	A	A	A	A	A	1	1	1	1	1	1	12	14	13	15	13	21	0.357143	0.6	0.571429	0	0.611111	0	1	0	0.210526	1	0.3125	1
86521068	T	C	C	C	C	C	C	1	1	1	1	1	1	179	162	55	110	98	154	0.952381	0.193277	0.980392	1	1	1	0	0.266667	0.126984	0	0	0.223404
20057207	T	A	A	A	A	A	A	1	1	1	1	1	1	65	43	13	36	33	19	0	0.5	0.464286	0.326087	0.25	1	1	0.4	0	1	0.35	0.470588
71416210	C	T	T	T	T	T	T	1	1	1	1	1	1	17	26	19	36	23	21	0.315789	0.666667	0.526316	0	0.642857	0	1	0	0.263158	1	0.368421	1
10105049	G	A	A	A	A	A	A	1	1	1	1	1	1	37	17	15	43	10	48	1	0.8	1	1	1	1	0	0	0	0	0	0
141201153	T	A	A	A	A	A	A	1	1	1	1	1	1	12	26	32	25	12	15	0	1	0	0	0	1	0	0.851852	0	1	1	1
30366744	A	G	G	G	G	G	G	1	1	1	1	1	1	23	20	19	12	25	12	1	1	0.933333	0	0.944444	1	0	0	0	0	0	1
846380	A	C	C	C	C	C	C	1	1	1	1	1	1	80	119	25	43	75	17	0.560976	0.565789	0	0.619048	1	1	0.480769	0.65625	0.444444	0	0	0.55814
9526683	A	G	G	G	G	G	G	1	1	1	1	1	1	13	14	15	18	34	48	0.888889	1	1	1	1	1	0	0	0	0	0	0
846179	C	T	T	T	T	T	T	1	1	1	1	1	1	85	73	39	45	96	14	0.717391	0.609756	0	0.433333	1	1	0.520833	0.469388	0.5	0	0	0.66129
46836869	C	T	T	T	T	T	T	1	1	1	1	1	1	30	35	12	60	30	29	0.2	0.761905	1	0	0.833333	0.368421	1	0.5	0	0	0.25	1
1563394	C	G	G	G	G	G	G	1	1	1	1	1	1	78	115	92	135	53	41	0.4	0.392857	1	0	1	1	0.385246	0.414141	0.385321	0.4	0.543478	0
40962687	A	G	G	G	G	G	G	1	1	1	1	1	1	70	41	51	61	44	50	0	0.357143	0.466667	0.645833	0.333333	1	0	0.4	0.576923	0.75	1	0.4
57317249	A	G	G	G	G	G	G	1	1	1	1	1	1	122	199	430	454	133	150	0	1	1	0.989247	1	1	0	0.979592	0	0	0	0
11048976	T	C	C	C	C	C	C	1	1	1	1	1	1	59	50	37	59	40	52	0	1	0.54902	0	0.461538	0.534884	0.314286	0.28	0.384615	1	0.454545	1
33036929	G	A	A	A	A	A	A	1	1	1	1	1	1	34	20	28	49	27	23	0.307692	1	0.378378	0.470588	0.7	0.548387	0	1	0.555556	0.52381	0.5	0
14890519	T	G	G	G	G	G	G	1	1	1	1	1	1	26	11	26	89	26	40	0	1	1	1	1	1	0	1	0	0	0	0
5932694	T	C	C	C	C	C	C	1	1	1	1	1	1	29	26	216	180	36	48	0	1	1	1	1	1	0	1	0	0	0	0
265746	A	G	G	G	G	G	G	1	1	1	1	1	1	21	94	87	123	104	187	0	1	1	1	1	1	0	1	0	0	0	0
84980730	T	C	C	C	C	C	C	1	1	1	1	1	1	29	46	79	83	44	59	0	1	1	1	1	1	0	1	0	0	0	0
72644598	A	G	G	G	G	G	G	1	1	1	1	1	1	22	24	92	83	12	44	0	1	1	1	1	1	0	1	0	0	0	0
60455330	T	G	G	G	G	G	G	1	1	1	1	1	1	201	169	141	141	71	182	1	1	0	0.507042	0.964912	0.484536	0	0.482517	0.392857	0.395833	0.418033	0.3875
60455435	C	G	G	G	G	G	G	1	1	1	1	1	1	191	172	126	146	81	125	1	1	0	0.450867	1	0.43	0	0.521008	0.28125	0.396476	0.485149	0.527778
99047339	A	G	G	G	G	G	G	1	1	1	1	1	1	84	36	42	122	51	47	0.407407	0	0	0.317073	1	0.37037	1	1	0	1	0	1
78254219	T	C	C	C	C	C	C	1	1	1	1	1	1	11	15	16	26	17	22	1	0.583333	1	1	1	0	0	0	0	0.5	0.666667	0.384615
46836593	C	T	T	T	T	T	T	1	1	1	1	1	1	39	20	50	61	23	70	0	0.764706	1	0	1	0.538462	1	0.52381	0	0	0.375	0.976744
28312087	A	T	T	T	T	T	T	1	1	1	1	1	1	67	63	35	69	18	42	0	1	0.4375	0.516129	0.833333	0.416667	0	0.6	0	0.461538	1	0.947368
3360934	C	T	T	T	T	T	T	1	1	1	1	1	1	46	41	49	60	53	58	0	0	0.388889	0.896552	0	0	1	1	1	0.428571	1	0.5
19538365	C	A	A	A	A	A	A	1	1	1	1	1	1	33	13	16	17	13	19	0	1	1	1	0.153846	1	1	0	0	0.461538	0.6	0
33037083	T	C	C	C	C	C	C	1	1	1	1	1	1	42	34	15	39	17	35	0	1	0.521739	0.7	0.769231	0.473684	0	1	0.789474	0.608696	0.354839	0
42962286	T	C	C	C	C	C	C	1	1	1	1	1	1	180	131	20	62	28	71	1	0	0.9875	1	0.604938	0	1	0.382353	0.268657	0	0	1
71419100	A	G	G	G	G	G	G	1	1	1	1	1	1	16	33	28	62	21	27	0.888889	1	0.941176	0.25	0.538462	0	1	0	0	0.625	0	1
39199217	C	T	T	T	T	T	T	1	1	1	1	1	1	26	21	11	32	12	43	0	0	0	1	1	1	0.5	1	1	0	0	0.75
83299585	A	G	G	G	G	G	G	1	1	1	1	1	1	72	72	24	60	30	47	0.323529	0.35	1	0.737705	0	0.34375	0	0.447368	1	0.648649	1	0.442308
6118584	G	C	C	C	C	C	C	1	1	1	1	1	1	16	12	18	28	14	97	0	1	0	0	0.666667	1	0	1	0	1	0.666667	1
30622231	T	C	C	C	C	C	C	1	1	1	1	1	1	67	78	31	54	27	13	0.365385	0.4	0.295455	0	1	1	1	0	0	0.333333	1	1
83299590	T	C	C	C	C	C	C	1	1	1	1	1	1	71	72	25	59	29	45	0.3125	0.421053	1	0.766667	0	0.296296	0	0.472222	1	0.655172	1	0.477273
40963213	A	G	G	G	G	G	G	1	1	1	1	1	1	44	16	12	27	32	34	0	0.636364	0.714286	0.52	0	1	1	0.357143	0.333333	0.333333	1	0.545455
10104600	G	A	A	A	A	A	A	1	1	1	1	1	1	49	39	44	61	14	62	1	1	1	1	1	1	0	0.466667	0	0	0	0
42965638	T	C	C	C	C	C	C	1	1	1	1	1	1	132	95	20	63	43	58	1	0	1	1	0.490909	0	1	0.383333	0.36	0	0.238095	1
6135091	A	G	G	G	G	G	G	1	1	1	1	1	1	13	17	10	19	15	42	0	1	0	0	0.5	1	0	1	0	1	1	1
40962094	T	C	C	C	C	C	C	1	1	1	1	1	1	123	82	71	100	40	58	0.382979	0.423077	0.702703	0.538462	0.434783	1	0.2	0.575	0.32	0.5	1	0.476923
40962686	C	T	T	T	T	T	T	1	1	1	1	1	1	81	40	52	58	46	50	0	0.428571	0.529412	0.666667	0.333333	1	0.5	0.4	0.56	0.75	1	0.4
11140521	C	T	T	T	T	T	T	1	1	1	1	1	1	67	34	49	100	86	180	0	1	1	0	0.5	1	0.521739	1	0.153846	0.666667	0.385965	0.346939
5856987	G	T	T	T	T	T	T	1	1	1	1	1	1	28	47	207	249	43	275	1	1	0	1	0	0	1	0.618705	0.979275	0	0.489796	0.498099
67770217	A	G	G	G	G	G	G	1	1	1	1	1	1	36	16	27	36	16	33	1	0.380952	1	1	1	1	0.333333	0	0	0.333333	0.32	0.25
71418623	C	G	G	G	G	G	G	1	1	1	1	1	1	49	31	50	99	40	32	0.533333	1	0.727273	0	0.571429	0	1	0	1	0.285714	0.5	1
114712786	G	A	A	A	A	A	A	1	1	1	1	1	1	35	50	10	24	13	22	0.535714	1	0.428571	1	0	0.64	0.7	0	0.32	1	0	1
46837170	G	C	C	C	C	C	C	1	1	1	1	1	1	46	44	19	51	37	40	0	1	1	0	1	0.466667	1	0.571429	0	0	0.59375	1
23661947	C	T	T	T	T	T	T	1	1	1	1	1	1	1400	579	267	407	749	372	1	1	0.995054	0.416386	1	1	0.418559	0	0.425791	0.38454	0	0
114700345	G	A	A	A	A	A	A	1	1	1	1	1	1	36	83	24	28	14	17	0.56	1	0.595745	0.955056	0	0.617647	0.431373	0	0.5	1	0	1
23658370	C	T	T	T	T	T	T	1	1	1	1	1	1	740	244	146	184	401	170	1	1	0.993399	0.439394	1	1	0.42402	0	0.442105	0.374332	0	0
40963051	G	A	A	A	A	A	A	1	1	1	1	1	1	58	28	19	38	30	16	0	0.433333	0.71875	0.387755	0.25	1	0.428571	1	0.5	0.608696	1	0.375
54522134	C	T	T	T	T	T	T	1	1	1	1	1	1	43	34	35	46	27	53	0.40625	1	0	0.514286	1	0.428571	0.44186	0.452381	0.5	0.6	0.375	1
40962072	A	G	G	G	G	G	G	1	1	1	1	1	1	128	76	73	103	36	63	0.404762	0.416667	0.692308	0.573171	0.277778	1	0.352941	0.615385	0.348837	0.555556	1	0.5
40962112	G	A	A	A	A	A	A	1	1	1	1	1	1	139	98	76	111	37	73	0.418605	0.482759	0.744186	0.541667	0.36	1	0.428571	0.521739	0.282609	0.464286	1	0.5
23672381	G	A	A	A	A	A	A	1	1	1	1	1	1	89	51	40	29	29	54	1	1	1	0.482759	1	1	0.414286	0	0.37037	0.561905	0	0
28912781	T	C	C	C	C	C	C	1	1	1	1	1	1	10	10	15	16	11	19	0	0	1	1	1	1	0	0	1	1	0.833333	0
7153235	C	T	T	T	T	T	T	1	1	1	1	1	1	33	26	29	19	33	18	1	1	0.366667	0.966667	0.5	1	0	1	0	0	1	0
1564118	A	G	G	G	G	G	G	1	1	1	1	1	1	22	31	23	25	11	27	0.333333	0.375	1	1	1	1	0.5	0.473684	0	0.586207	0.565217	0
83299505	A	G	G	G	G	G	G	1	1	1	1	1	1	106	65	31	56	30	56	0.416667	0.5	1	0.704545	0	0.37931	0	0.638889	1	0.690909	1	0.509804
13453872	C	G	G	G	G	G	G	1	1	1	1	1	1	19	25	22	16	17	18	0	1	1	1	0	1	0.461538	0	1	0.428571	0.333333	0.625
10170615	T	C	C	C	C	C	C	1	1	1	1	1	1	43	33	28	30	28	107	0	1	0.428571	0.956522	0.727273	0	1	0.454545	0.833333	0.666667	0	0.785714
1563318	C	T	T	T	T	T	T	1	1	1	1	1	1	89	141	69	93	45	47	0.451923	0.391304	1	1	1	1	0.270833	0.4	0.336957	0.453488	0.54902	0
11141098	G	C	C	C	C	C	C	1	1	1	1	1	1	64	21	37	54	35	78	0	1	1	0	0.5	1	0.375	1	0.3	0.473684	0.448276	0.777778
63562171	A	G	G	G	G	G	G	1	1	1	1	1	1	30	20	15	13	22	13	0.4	1	0.666667	0.266667	1	0	0.5625	0	0.833333	1	1	0.166667
8988216	A	G	G	G	G	G	G	1	1	1	1	1	1	84	65	24	53	46	16	1	1	0.317757	0.523077	0.155556	0.246154	1	1	0.368421	0.301205	0	1
71418788	C	T	T	T	T	T	T	1	1	1	1	1	1	17	28	59	98	38	23	0.714286	1	0.8	0	0.576923	0	1	0	0.764706	0.666667	0.4	1
64816361	C	T	T	T	T	T	T	1	1	1	1	1	1	24	16	13	34	18	43	0	1	1	1	1	1	0	1	0	0.428571	0	0.5
42966340	A	G	G	G	G	G	G	1	1	1	1	1	1	93	94	30	45	52	59	1	0	1	1	0.3125	0	1	0.466667	1	0.151515	0	1
40963185	C	G	G	G	G	G	G	1	1	1	1	1	1	45	22	11	23	18	32	0	0.636364	0.8	0.521739	0	1	1	0.583333	0.333333	0.615385	1	0.466667
13293530	C	T	T	T	T	T	T	1	1	1	1	1	1	15	31	17	34	32	35	1	1	0.3	0	0.157895	1	0	1	1	0	1	0.5
8673861	A	G	G	G	G	G	G	1	1	1	1	1	1	47	50	27	20	33	28	0.521739	1	1	0.722222	1	0.5	0	0.25	0.375	1	0.272727	0.333333
11140588	C	T	T	T	T	T	T	1	1	1	1	1	1	62	31	51	126	98	191	0	1	1	0	0.371429	0.97561	0.677419	1	0.5	0.558824	0.381818	0.511111
9819595	A	G	G	G	G	G	G	1	1	1	1	1	1	14	11	15	27	10	24	0	0	1	0.5	0.4	0.363636	1	0.714286	0	1	1	1
40963509	A	G	G	G	G	G	G	1	1	1	1	1	1	45	30	24	35	18	37	0	0.454545	0.666667	0.366667	0	1	0.666667	0.625	1	0.8	1	0.4
130066831	G	A	A	A	A	A	A	1	1	1	1	1	1	222	214	67	180	84	164	0.980769	0	1	1	1	1	1	0	0	0	1	0
112649898	A	C	C	C	C	C	C	1	1	1	1	1	1	88	44	27	32	49	31	0	0	1	1	1	1	1	0.980769	0	0	0	1
110319287	C	G	G	G	G	G	G	1	1	1	1	1	1	151	60	72	97	107	141	1	1	1	1	0	0.9875	1	0	0	0	0	1
76249229	T	C	C	C	C	C	C	1	1	1	1	1	1	44	17	17	38	18	13	1	0	1	1	0	1	0	1	1	0	0	1
56183550	C	T	T	T	T	T	T	1	1	1	1	1	1	51	43	10	114	30	18	1	0	1	1	0	1	0	0	1	0	1	1
6003764	A	T	T	T	T	T	T	1	1	1	1	1	1	18	11	28	40	10	31	0	1	0	1	1	0	0	1	0	1	1	1
65767100	C	T	T	T	T	T	T	1	1	1	1	1	1	106	40	74	131	65	111	1	0.5625	1	1	1	1	1	0	0	0	0	0.461538
27693936	T	C	C	C	C	C	C	1	1	1	1	1	1	17	12	15	19	28	42	0	0.428571	1	1	1	0	1	0	0	0.6	1	1
11141061	A	G	G	G	G	G	G	1	1	1	1	1	1	89	26	48	65	47	100	0	1	1	0	0.490196	0.980392	0.382353	1	0.72	0.522727	0.365079	0.575758
65766941	A	G	G	G	G	G	G	1	1	1	1	1	1	123	39	41	128	61	63	1	0.551724	1	1	1	1	1	0	0	0	0	0.486486
1563609	C	T	T	T	T	T	T	1	1	1	1	1	1	63	76	57	103	50	47	0.392157	0.408163	1	1	1	1	0.407767	0.422222	0.277778	0.34375	0.788462	0
25542525	A	G	G	G	G	G	G	1	1	1	1	1	1	28	13	30	26	14	47	1	1	0.428571	1	0.666667	0.333333	0	0	0.375	0.25	1	1
83299280	A	G	G	G	G	G	G	1	1	1	1	1	1	42	82	43	82	16	61	0.882353	0.538462	1	0.46875	0	0.666667	0	0.5	0.882353	0.574074	1	0.54717
40962428	C	T	T	T	T	T	T	1	1	1	1	1	1	105	91	28	90	49	83	0.75	0.636364	0.40625	0.577465	0.75	1	0.555556	0.4375	0	0.527778	1	0.42029
40962492	C	T	T	T	T	T	T	1	1	1	1	1	1	86	76	29	88	59	80	0.444444	0.346154	0.444444	0.555556	0.777778	1	0.5	0.583333	0.62963	0.384615	0.970588	0.450704
9819371	A	G	G	G	G	G	G	1	1	1	1	1	1	10	24	11	25	19	15	0.571429	0	1	0.636364	0	0.4	1	0.5	0	1	1	1
40849153	C	T	T	T	T	T	T	1	1	1	1	1	1	11	26	43	52	25	53	0.714286	0.555556	0	1	0.588235	0.466667	0.478261	1	0.592105	0.296296	0.428571	1
11140782	C	G	G	G	G	G	G	1	1	1	1	1	1	90	23	41	72	73	179	0	1	1	0	0.69697	1	0.7	1	0.227273	0.471698	0.5	0.529412
7153344	C	T	T	T	T	T	T	1	1	1	1	1	1	31	26	19	39	57	52	1	1	0.583333	0.96875	0.578947	1	0	1	0	0	1	0
71373535	A	G	G	G	G	G	G	1	1	1	1	1	1	53	51	18	40	25	42	1	1	1	1	1	0.7	0	0.47619	0.333333	0.653846	0	0
104275739	T	C	C	C	C	C	C	1	1	1	1	1	1	31	23	23	53	16	19	0.4	1	0.714286	0.5	1	1	0	0	0	0.555556	1	1
6970912	C	G	G	G	G	G	G	1	1	1	1	1	1	201	128	148	230	131	335	1	1	1	1	0.5	0	0	0.45283	1	0.36	0.380282	0.484848
65814754	A	G	G	G	G	G	G	1	1	1	1	1	1	74	81	57	55	45	81	0.984848	0.363636	1	1	1	1	1	0	0	0	0.472222	0.375
62548470	G	A	A	A	A	A	A	1	1	1	1	1	1	19	13	17	52	14	24	1	0.363636	0.5	0.846154	1	1	1	0.5	0	1	0	0
71954403	A	G	G	G	G	G	G	1	1	1	1	1	1	47	37	22	64	42	44	1	1	0.333333	1	1	1	0	1	0.425	0	0	0.457627
16346803	C	G	G	G	G	G	G	1	1	1	1	1	1	24	16	18	25	22	14	1	1	1	1	1	1	0	0	0.564103	0.333333	0.322581	0
11139706	G	A	A	A	A	A	A	1	1	1	1	1	1	139	76	90	129	144	120	0	0.98773	0.982036	0	0.52907	1	0.525773	1	0.572519	0.5	0.52356	0.604167
40962318	T	C	C	C	C	C	C	1	1	1	1	1	1	95	63	33	92	52	60	0.545455	0.62963	0.611111	0.568966	0.75	1	0.25	0.52381	0.5	0.347826	1	0.508475
11139235	G	A	A	A	A	A	A	1	1	1	1	1	1	297	132	239	354	296	343	0	1	0.931818	0	0.478261	0.984375	0.5625	1	0.672897	0.4	0.602564	0.6125
11140391	A	G	G	G	G	G	G	1	1	1	1	1	1	69	50	34	99	121	201	0	0.980392	1	0	0.545455	1	0.583333	1	0.4	0.521739	0.629032	0.587302
10811646	C	A	A	A	A	A	A	1	1	1	1	1	1	64	21	13	30	12	25	1	1	1	1	1	1	0.307692	0	0	0.55814	0	0.391304
93243389	C	T	T	T	T	T	T	1	1	1	1	1	1	76	22	16	39	33	28	0	1	1	1	1	1	0	1	0	1	0	0.266667
77904548	C	G	G	G	G	G	G	1	1	1	1	1	1	22	13	11	15	18	16	0	1	1	1	0	0	1	1	1	0.5	0.571429	0.2
23344520	T	C	C	C	C	C	C	1	1	1	1	1	1	31	32	10	33	19	25	0	1	1	1	1	1	0	0.3	0	1	1	0
17774250	C	G	G	G	G	G	G	1	1	1	1	1	1	26	23	23	38	45	13	1	1	0.5	1	1	0	0.857143	1	0.444444	0.5	0	0
9523283	C	G	G	G	G	G	G	1	1	1	1	1	1	10	11	11	24	80	84	1	1	1	1	1	1	0.44	0	0	0.4	0	0.466667
134130474	G	C	C	C	C	C	C	1	1	1	1	1	1	45	31	36	22	27	24	1	1	0.513514	0.363636	0.454545	1	0	1	1	0	0	1
40849183	C	A	A	A	A	A	A	1	1	1	1	1	1	10	18	33	41	17	37	0.675676	0.75	0	0.866667	0.526316	0.769231	0.409091	1	0.555556	0.222222	0.588235	1
77905331	G	A	A	A	A	A	A	1	1	1	1	1	1	31	22	19	25	29	20	1	1	1	1	0	0	1	1	0.222222	0.4375	0.444444	0.266667
22994804	C	G	G	G	G	G	G	1	1	1	1	1	1	95	85	56	62	61	45	0	1	0.538462	0.538462	0.411765	0.5	1	1	0.4	0	1	1
42568725	A	C	C	C	C	C	C	1	1	1	1	1	1	25	25	14	20	26	28	1	0.705882	1	0.777778	0.555556	0.5	0.705882	0.181818	1	0	0	1
11140401	C	T	T	T	T	T	T	1	1	1	1	1	1	84	54	33	97	126	211	0	1	1	0	0.608696	1	0.72	1	0.380952	0.574468	0.609375	0.559322
76664809	T	C	C	C	C	C	C	1	1	1	1	1	1	53	45	11	58	59	51	0	0.676471	0	0.6	0	0.2	1	1	1	1	1	1
11141324	A	G	G	G	G	G	G	1	1	1	1	1	1	55	40	14	25	41	87	0	1	0.978261	0	0.6	1	0.857143	1	0.666667	0.560976	0.548387	0.266667
86521176	A	G	G	G	G	G	G	1	1	1	1	1	1	145	108	39	108	62	84	0.96875	0.183673	1	1	1	1	0.381679	0.234375	0	0.434978	0.284091	1
71463580	T	C	C	C	C	C	C	1	1	1	1	1	1	70	109	19	46	19	16	0.833333	0.590909	1	0.675	0.705882	0.55	1	0.809524	0	0.680851	0.657658	0
76002832	T	C	C	C	C	C	C	1	1	1	1	1	1	340	148	45	81	159	99	1	0	0.49505	1	0.540816	1	0.528736	0.431507	0	1	0.544218	0.988304
33024932	C	G	G	G	G	G	G	1	1	1	1	1	1	29	20	10	25	26	23	0	1	1	1	1	1	0	1	0.333333	0.782609	0.470588	0
71436709	G	A	A	A	A	A	A	1	1	1	1	1	1	43	42	18	38	31	35	1	1	1	1	1	1	0	1	0.6	0	0	0
49085984	C	A	A	A	A	A	A	1	1	1	1	1	1	38	14	10	36	21	15	1	1	1	1	1	0.5	0	0	1	0	0.25	0.857143
8923722	A	G	G	G	G	G	G	1	1	1	1	1	1	47	23	18	30	20	45	1	1	1	0.954545	1	0.8	0	0	0.424242	1	0	0.444444
8987672	G	T	T	T	T	T	T	1	1	1	1	1	1	133	106	77	133	80	136	1	1	0.465278	0.460784	0.532258	0.469565	1	1	0.166667	0.535714	0	1
27079325	A	C	C	C	C	C	C	1	1	1	1	1	1	22	15	22	27	13	10	1	1	0.833333	0.37037	1	1	0	0	0.625	0.47619	1	0.333333
6971220	G	A	A	A	A	A	A	1	1	1	1	1	1	181	108	108	233	103	253	1	1	1	1	0.463415	0.518519	0	0.5	1	0.434783	0.367347	0.37931
8987824	A	G	G	G	G	G	G	1	1	1	1	1	1	210	100	58	150	78	146	1	1	0.406417	0.384615	0.446429	0.462185	1	1	0.520833	0.445161	0	1
120428195	T	C	C	C	C	C	C	1	1	1	1	1	1	30	41	10	12	19	11	1	0.615385	0.6	1	1	0.666667	0.5	0	0.285714	1	0	1
6971391	G	T	T	T	T	T	T	1	1	1	1	1	1	119	103	95	151	109	210	1	1	1	1	0.488372	0.435897	0	0.5	1	0.4	0.44	0.407407
25425822	C	T	T	T	T	T	T	1	1	1	1	1	1	188	25	23	18	30	22	0	1	1	1	1	1	0	0.4	0	0.272727	1	1
6971332	T	C	C	C	C	C	C	1	1	1	1	1	1	159	77	87	167	64	271	1	0.966667	1	1	0.45	0.605263	0	0.553191	1	0.40678	0.34375	0.368421
6133883	C	T	T	T	T	T	T	1	1	1	1	1	1	23	16	67	96	22	128	0.5	1	0	0	0.333333	1	1	1	0	1	0.866667	1
22995865	T	C	C	C	C	C	C	1	1	1	1	1	1	175	191	63	120	110	52	0.614583	1	0.462069	0.491228	0.409836	0.419355	1	1	0.309524	0	1	1
6042575	A	G	G	G	G	G	G	1	1	1	1	1	1	16	23	45	54	25	112	0	1	1	1	1	1	1	0.666667	0	0	0.487179	0.576923
14788614	A	T	T	T	T	T	T	1	1	1	1	1	1	38	39	15	19	33	43	0.454545	1	1	1	0	0.526316	0.269841	0.538462	1	1	0	1
6971349	C	G	G	G	G	G	G	1	1	1	1	1	1	157	87	97	200	76	298	1	1	1	1	0.508197	0.536585	0	0.5	1	0.365079	0.459459	0.428571
8987422	C	G	G	G	G	G	G	1	1	1	1	1	1	165	115	55	127	81	102	1	1	0.568	0.644737	0.422222	0.538462	1	1	0	0.630952	0	1
37860983	C	T	T	T	T	T	T	1	1	1	1	1	1	24	45	33	53	41	64	0.578947	1	0.944444	0	0.833333	0	1	1	0.5	0	1	1
49095342	G	A	A	A	A	A	A	1	1	1	1	1	1	133	45	36	35	46	42	1	1	1	1	1	0.571429	0.275862	0	1	0	0.422222	0.596491
6971357	A	G	G	G	G	G	G	1	1	1	1	1	1	173	110	113	203	93	320	1	1	1	1	0.47541	0.543478	0	0.507937	1	0.410959	0.486486	0.442857
49095657	T	C	C	C	C	C	C	1	1	1	1	1	1	121	63	57	63	58	57	1	1	1	0.977528	1	0.421053	0.526882	0	1	0	0.523077	0.441441
8988297	G	A	A	A	A	A	A	1	1	1	1	1	1	144	129	79	93	64	46	1	1	0.455197	0.545455	0.412281	0.419192	1	1	0.52459	0.538462	0	1
3070866	A	G	G	G	G	G	G	1	1	1	1	1	1	63	37	53	36	27	52	0	0	1	0.904762	0	0	1	1	1	1	1	1
32185177	C	G	G	G	G	G	G	1	1	1	1	1	1	73	23	36	68	30	68	1	0	0.25	0.75	1	0.6875	0.444444	1	0.235294	0.538462	1	1
49216631	G	T	T	T	T	T	T	1	1	1	1	1	1	42	38	34	80	28	25	1	1	1	1	1	0.5	0.30303	0	0.96	0	0.185185	0.964286
64314031	A	G	G	G	G	G	G	1	1	1	1	1	1	51	50	26	55	28	28	1	1	0.960784	1	1	1	0.666667	0	0	0.5	0.793103	0
112864693	A	G	G	G	G	G	G	1	1	1	1	1	1	49	26	27	47	47	32	0.529412	1	0.567568	0.54	0.608696	0	1	1	0	1	0.675	1
28206987	T	C	C	C	C	C	C	1	1	1	1	1	1	100	109	43	93	72	24	0.55615	0.586957	0.612903	1	0.366667	0.558824	0.716981	0.415094	0.482759	0.648649	1	1
49216632	C	T	T	T	T	T	T	1	1	1	1	1	1	41	38	35	81	30	26	1	1	1	1	1	0.5	0.30303	0	0.96	0	0.185185	1
22390438	A	G	G	G	G	G	G	1	1	1	1	1	1	25	20	12	42	19	24	1	0	1	1	1	1	0.5625	0	1	0.416667	0	1
28310204	T	C	C	C	C	C	C	1	1	1	1	1	1	56	16	32	47	52	87	0	1	0	1	0.981132	1	0	1	1	0	1	1
37860935	A	G	G	G	G	G	G	1	1	1	1	1	1	27	53	28	55	33	48	0.642857	1	0.954545	0	0.75	0	1	1	0.333333	0.307692	1	1
8985535	A	G	G	G	G	G	G	1	1	1	1	1	1	66	80	27	48	26	40	1	1	0.428571	0.5	0.6	0.548387	1	1	0.375	0.545455	0	1
7783905	T	C	C	C	C	C	C	1	1	1	1	1	1	23	21	42	14	19	22	0.4	1	1	1	1	0.454545	0.285714	0.454545	0.4	1	0.481481	0.521739
59964556	C	G	G	G	G	G	G	1	1	1	1	1	1	28	24	60	108	14	68	1	1	0	1	0	0	1	0	1	1	1	1
118179514	G	A	A	A	A	A	A	1	1	1	1	1	1	33	17	13	22	15	14	0	1	0	0	0	1	1	1	1	1	1	1
23323674	G	C	C	C	C	C	C	1	1	1	1	1	1	22	25	15	20	12	19	0	1	1	1	1	1	0	0	1	1	1	0
55426488	T	C	C	C	C	C	C	1	1	1	1	1	1	33	26	23	39	39	51	1	1	1	1	1	1	0	0	0	1	1	0
23734617	T	C	C	C	C	C	C	1	1	1	1	1	1	57	42	40	88	34	70	0	1	1	1	1	1	1	0	0	0	1	1
9842561	T	C	C	C	C	C	C	1	1	1	1	1	1	22	15	15	40	31	26	0	1	0.272727	0.333333	1	0.6	1	0.545455	1	0.666667	0.583333	1
21011608	C	T	T	T	T	T	T	1	1	1	1	1	1	77	15	15	33	57	41	1	1	0.971429	1	1	0.625	0	1	0	0.466667	0.65	0.307692
30557703	A	G	G	G	G	G	G	1	1	1	1	1	1	18	21	11	22	13	27	1	1	1	0.956522	1	1	1	0	0	0	0.571429	0.5
71765537	A	G	G	G	G	G	G	1	1	1	1	1	1	46	37	16	14	22	11	0.625	1	1	1	1	0.608696	1	0.6	0	0.647059	0.576923	0
52349007	C	A	A	A	A	A	A	1	1	1	1	1	1	92	24	36	55	36	82	0	1	1	1	1	1	1	0.538462	0	0.294118	0.25	1
52349007	C	A	A	A	A	A	A	1	1	1	1	1	1	92	24	36	55	36	82	0	1	1	1	1	1	1	0.538462	0	0.294118	0.25	1
6971110	A	G	G	G	G	G	G	1	1	1	1	1	1	175	89	96	227	114	195	1	0.985714	1	1	0.661538	0.489796	0	0.484848	1	0.464789	0.40678	0.61194
6970664	G	T	T	T	T	T	T	1	1	1	1	1	1	248	117	134	274	146	382	1	1	1	1	0.608696	0.505618	0	0.479167	1	0.377049	0.512195	0.632653
34719945	C	A	A	A	A	A	A	1	1	1	1	1	1	36	33	25	20	29	32	1	1	1	1	1	1	0	0	0.454545	0.666667	1	0
4049906	A	G	G	G	G	G	G	1	1	1	1	1	1	251	205	103	203	143	144	1	1	1	1	1	0.988889	1	0.52439	0	0.627119	0	0
85208750	A	G	G	G	G	G	G	1	1	1	1	1	1	21	24	25	42	29	75	0	0.5	0.75	0.5	0	1	1	1	0.8	0.6	1	1
104004574	G	A	A	A	A	A	A	1	1	1	1	1	1	43	29	18	31	19	32	1	1	1	0.380952	1	1	0.515152	0.392857	0.384615	1	0.482759	0
34808308	T	A	A	A	A	A	A	1	1	1	1	1	1	28	32	11	20	35	31	1	1	1	1	1	1	0.4	0.545455	0.6	0	0.615385	0
1314679	T	C	C	C	C	C	C	1	1	1	1	1	1	45	26	23	23	11	12	0.25	1	1	0.913043	1	1	0.4	0.357143	1	0.45	0.8	0
21223515	G	C	C	C	C	C	C	1	1	1	1	1	1	27	48	16	24	14	19	0.647059	1	1	1	0	0.393939	1	0.761905	0.421053	0.482759	1	0.465517
39193301	A	G	G	G	G	G	G	1	1	1	1	1	1	64	36	37	42	38	32	1	0.427184	1	1	1	1	0.45	0	0.555556	0.374302	0.378947	1
37860954	G	A	A	A	A	A	A	1	1	1	1	1	1	33	52	33	57	36	58	0.647059	1	0.9375	0	0.857143	0	1	1	0.565217	0.181818	1	1
48829490	G	T	T	T	T	T	T	1	1	1	1	1	1	20	34	20	20	14	19	0	0	1	1	1	1	0.5	0.533333	1	1	0.777778	0.4
33037727	C	T	T	T	T	T	T	1	1	1	1	1	1	24	18	24	29	17	32	1	1	1	1	1	1	0	1	0.444444	0.777778	0	0
27155565	A	G	G	G	G	G	G	1	1	1	1	1	1	91	91	44	128	45	100	0	1	0	0	1	1	0.866667	0.818182	0.7	0.839286	1	1
36211338	A	G	G	G	G	G	G	1	1	1	1	1	1	53	44	32	38	40	15	1	0.529412	1	1	1	1	0.377358	0	0.517241	0.28	0.52381	1
33036511	T	A	A	A	A	A	A	1	1	1	1	1	1	69	10	46	37	30	24	1	0.970588	0.979592	1	1	1	0	1	0.166667	0.644068	0.477273	0
29921154	G	A	A	A	A	A	A	1	1	1	1	1	1	46	26	50	41	23	22	1	0	0.72	0.931034	1	1	0.413793	0.653846	1	0.521739	1	0
28699386	T	C	C	C	C	C	C	1	1	1	1	1	1	119	75	63	109	63	112	1	1	1	1	1	0.980769	0.36	0.305556	1	0	0.595238	0
1794722	G	C	C	C	C	C	C	1	1	1	1	1	1	44	29	19	47	21	35	1	1	1	1	1	1	0.347826	1	0	0.26087	0.647059	0
33039000	C	T	T	T	T	T	T	1	1	1	1	1	1	92	36	79	93	47	117	1	1	1	1	1	1	0	1	0.327273	0.425532	0.529412	0
24889045	T	C	C	C	C	C	C	1	1	1	1	1	1	260	182	112	188	137	122	1	0.5	1	0.548387	0.991597	0.491329	1	0.556886	0.56338	0.634021	0	1
1794356	T	C	C	C	C	C	C	1	1	1	1	1	1	46	51	13	35	28	29	1	1	1	1	1	1	0.483871	1	0	0.34	0.465116	0
72020602	A	G	G	G	G	G	G	1	1	1	1	1	1	43	18	19	29	13	10	1	1	0.484848	1	1	1	0.555556	1	0.730769	0	0	0.533333
122030275	C	T	T	T	T	T	T	1	1	1	1	1	1	15	35	24	30	12	22	1	0.333333	1	0.933333	1	0.421053	0	0.52381	0.521739	1	1	0.576923
8470683	T	A	A	A	A	A	A	1	1	1	1	1	1	43	27	23	43	13	22	1	1	1	1	0	1	1	0	1	0.714286	0	0.615385
26810995	A	G	G	G	G	G	G	1	1	1	1	1	1	224	126	90	176	120	67	0.412698	1	1	0.511628	1	1	1	0.435294	0	0	1	1
35535454	T	C	C	C	C	C	C	1	1	1	1	1	1	51	34	15	26	10	22	0.444444	1	0.652174	1	1	1	0	0.4	1	1	0.444444	0.423077
49215267	C	T	T	T	T	T	T	1	1	1	1	1	1	81	93	64	107	50	48	1	1	1	1	1	0.382353	0.5625	0	0.981982	0	0.4375	1
9819616	A	G	G	G	G	G	G	1	1	1	1	1	1	16	13	17	33	11	22	0.333333	0	1	0.5625	0.461538	0.416667	1	0.590909	1	1	1	1
42569917	C	T	T	T	T	T	T	1	1	1	1	1	1	68	24	23	57	49	54	1	1	1	1	0.458333	0.542857	1	1	0.35	0.489362	0.526316	0
14789055	G	A	A	A	A	A	A	1	1	1	1	1	1	92	42	10	34	48	34	0.75	1	1	1	0	0.392857	0.454545	0.771429	1	1	0	1
25846278	G	C	C	C	C	C	C	1	1	1	1	1	1	235	31	24	20	39	17	1	1	1	1	1	1	0	0.188679	0	0.183673	1	1
3300613	T	C	C	C	C	C	C	1	1	1	1	1	1	93	58	63	91	79	47	0	1	1	1	1	1	0.966667	0	1	0.461538	0.277778	0.666667
120918563	G	A	A	A	A	A	A	1	1	1	1	1	1	75	133	75	159	87	113	1	0.52	1	1	1	0.5	1	0	0.666667	0.447059	0.244898	1
10496937	G	A	A	A	A	A	A	1	1	1	1	1	1	35	46	42	50	28	28	1	1	0.410256	1	1	1	1	0	0.5	0.473684	0	1
14788868	G	C	C	C	C	C	C	1	1	1	1	1	1	44	20	22	40	44	30	0.761905	1	1	1	0	0.380952	0.545455	0.714286	1	1	0	1
40961776	C	T	T	T	T	T	T	1	1	1	1	1	1	34	38	37	40	10	35	0.909091	0.8	0.6875	0.461538	0.461538	1	0.833333	0.5	0.692308	0.363636	1	0.7
73442633	T	C	C	C	C	C	C	1	1	1	1	1	1	47	65	13	40	46	14	1	1	1	0	1	0	1	1	0	1	1	0.416667
48027954	C	G	G	G	G	G	G	1	1	1	1	1	1	35	52	23	17	26	18	1	1	0	1	0.363636	0.227273	1	1	0.703704	0.647059	1	0.47619
6040136	G	A	A	A	A	A	A	1	1	1	1	1	1	27	20	18	54	35	62	1	1	1	1	1	1	1	0.714286	0	0	0.333333	0.375
21017309	A	G	G	G	G	G	G	1	1	1	1	1	1	44	38	13	35	20	14	1	1	1	1	1	0.363636	0	0.956522	0.384615	0.533333	0.615385	0.580645
14788875	C	T	T	T	T	T	T	1	1	1	1	1	1	44	22	22	46	45	26	0.807692	1	1	1	0	0.347826	0.567568	0.714286	1	1	0	1
112122075	C	G	G	G	G	G	G	1	1	1	1	1	1	27	24	24	21	17	14	1	1	0.4375	0.586207	1	1	1	0.625	0.733333	0	0.772727	0.32
76179405	A	G	G	G	G	G	G	1	1	1	1	1	1	69	66	26	100	48	113	1	0	0.409836	1	0.25974	0.982143	1	0.46875	0.888889	0.468085	1	1
77897469	C	T	T	T	T	T	T	1	1	1	1	1	1	242	263	269	391	167	280	1	0.576271	1	0.432432	1	1	1	0	0	1	0.482759	1
43004367	T	C	C	C	C	C	C	1	1	1	1	1	1	98	41	19	43	38	14	1	0.372093	0.465116	1	1	1	1	0	0.65625	0.604651	0.4	1
6115230	A	G	G	G	G	G	G	1	1	1	1	1	1	19	14	56	82	33	73	0	1	0.625	0.5	0.884615	1	1	1	0	1	0.5	1
62502128	T	C	C	C	C	C	C	1	1	1	1	1	1	89	68	33	62	73	50	1	0.369565	0.43038	0	1	1	1	0.348837	0.363636	1	1	1
110169699	A	G	G	G	G	G	G	1	1	1	1	1	1	51	34	20	47	19	31	0	1	1	0.980392	0.6	0.4375	0.5	1	0	1	1	1
70505406	A	G	G	G	G	G	G	1	1	1	1	1	1	57	40	38	68	32	54	1	1	0.658537	0.733333	1	1	0.5	1	1	0	0	0.626667
9090931	A	G	G	G	G	G	G	1	1	1	1	1	1	26	19	26	39	24	48	0.666667	1	0	0.5	1	0	0.352941	1	1	1	1	1
108210001	A	G	G	G	G	G	G	1	1	1	1	1	1	14	15	22	39	33	43	1	1	1	1	0.925926	1	0.517241	0.230769	0.875	0	0.555556	0.416667
107577470	G	C	C	C	C	C	C	1	1	1	1	1	1	29	21	18	26	24	31	1	0.333333	1	1	1	1	1	0.2	1	0	0	1
46152345	A	G	G	G	G	G	G	1	1	1	1	1	1	1535	1281	438	729	785	745	1	0.999102	0.999188	1	1	0.998573	0	1	0	0	0.542504	1
35970657	T	C	C	C	C	C	C	1	1	1	1	1	1	53	22	48	61	35	69	0	0	1	1	1	0	0.75	1	1	1	0.8	1
88129061	T	C	C	C	C	C	C	1	1	1	1	1	1	66	42	96	48	26	42	0	1	0	0.457143	0.444444	0.65625	1	1	1	1	1	1
63560715	G	C	C	C	C	C	C	1	1	1	1	1	1	38	14	22	24	28	14	0.5	1	0.568966	0.434783	1	0	0.666667	1	1	1	1	0.390244
2434362	T	C	C	C	C	C	C	1	1	1	1	1	1	41	68	45	79	14	28	1	1	1	1	1	1	0.486486	0.515152	0	0.4	0.166667	1
92439218	A	C	C	C	C	C	C	1	1	1	1	1	1	14	14	30	38	13	11	1	0	0.666667	0	1	1	0.333333	1	1	1	0.571429	1
25425470	G	A	A	A	A	A	A	1	1	1	1	1	1	261	61	13	28	39	23	1	1	1	1	1	1	0.153846	0.190476	0	0.236364	1	1
37861597	A	G	G	G	G	G	G	1	1	1	1	1	1	36	37	44	99	39	76	0.708333	1	1	0	0.617647	0	1	1	0.921053	0.347826	1	1
4774750	C	G	G	G	G	G	G	1	1	1	1	1	1	275	162	79	216	153	97	1	1	0.378788	1	0.555556	1	0.380531	1	0	1	0.283333	1
63560505	G	C	C	C	C	C	C	1	1	1	1	1	1	27	26	14	18	32	17	0.72	1	0.446809	0.357143	1	0	0.452381	1	1	1	1	0.633333
35970689	A	T	T	T	T	T	T	1	1	1	1	1	1	59	28	49	63	32	66	0	0	1	1	1	0	0.8	1	1	1	0.823529	1
14789196	T	C	C	C	C	C	C	1	1	1	1	1	1	67	46	11	45	29	46	0.901639	1	0.985507	1	0	0.575758	0.375	0.790323	1	1	0	1
25186361	T	C	C	C	C	C	C	1	1	1	1	1	1	25	42	18	49	32	23	0	1	1	0.538462	1	1	0.181818	1	1	0.45	1	0.458333
56680137	A	G	G	G	G	G	G	1	1	1	1	1	1	73	48	18	33	49	14	0.555556	1	1	0.421053	0.777778	0.444444	1	0.96	0	1	0.473684	1
82509814	C	T	T	T	T	T	T	1	1	1	1	1	1	50	41	12	22	48	27	1	1	1	1	1	1	0	1	0	0.584906	0.578947	0.5
45068370	G	C	C	C	C	C	C	1	1	1	1	1	1	16	10	22	21	14	50	0.333333	1	1	0.888889	1	1	0	1	1	0	0.444444	1
14251943	A	G	G	G	G	G	G	1	1	1	1	1	1	42	17	14	21	20	24	1	1	1	1	0.5	1	0.833333	1	0	0.761905	0.571429	0
86620012	T	A	A	A	A	A	A	1	1	1	1	1	1	18	10	12	15	19	13	0	1	1	0.952381	1	1	0	0.875	0	0.846154	1	1
88919441	A	G	G	G	G	G	G	1	1	1	1	1	1	36	20	16	10	41	12	1	0.4	1	1	1	0.48	1	0	0.4	1	0.409091	1
147024541	T	C	C	C	C	C	C	1	1	1	1	1	1	405	265	118	122	167	90	1	1	0.451515	0.994413	1	1	0.473485	0.471503	0.395349	1	0.40113	0.503185
46324205	A	G	G	G	G	G	G	1	1	1	1	1	1	40	21	21	43	13	28	0.5	1	1	1	1	1	0	1	1	0.5	0	0.692308
30106193	C	A	A	A	A	A	A	1	1	1	1	1	1	67	24	35	53	56	44	1	0.351351	1	0.684211	0.615385	1	0.434783	1	0.5	0.655172	1	0.454545
25426141	C	T	T	T	T	T	T	1	1	1	1	1	1	251	62	153	197	51	16	1	1	1	1	1	1	0.263158	0.264151	0	0.176471	1	1
44763189	C	G	G	G	G	G	G	1	1	1	1	1	1	33	45	33	66	21	64	0	0.875	0	0.774194	1	1	1	0.4	0.857143	0.923077	0.875	1
21727356	C	T	T	T	T	T	T	1	1	1	1	1	1	19	10	16	38	30	46	1	1	1	0.653846	0.25	1	1	1	0	0.368421	1	0.435897
86620010	C	G	G	G	G	G	G	1	1	1	1	1	1	18	10	13	16	16	12	0	1	1	1	1	1	0	0.875	0	0.846154	1	1
86620011	G	A	A	A	A	A	A	1	1	1	1	1	1	18	10	13	15	15	12	0	1	1	1	1	1	0	0.875	0	0.846154	1	1
54816959	A	G	G	G	G	G	G	1	1	1	1	1	1	41	19	17	26	25	58	0	0	1	1	0	1	1	1	1	0.882353	1	0.846154
95367185	T	C	C	C	C	C	C	1	1	1	1	1	1	55	41	17	10	13	41	0	1	1	1	0.166667	1	1	0.571429	0	1	1	1
27914707	A	G	G	G	G	G	G	1	1	1	1	1	1	488	332	82	134	238	69	1	1	0.475162	0.963483	0	0.996942	1	0.498747	0.386861	0.456576	0.966887	1
29919973	T	C	C	C	C	C	C	1	1	1	1	1	1	13	17	25	30	12	23	1	1	1	0.944444	0.363636	0.666667	0.5	0.692308	0.416667	0.173913	1	1
61785903	C	G	G	G	G	G	G	1	1	1	1	1	1	120	43	56	109	51	21	0.266667	1	1	0.567568	0.613636	1	1	0.490196	0.3	0.520833	1	1
33037116	C	T	T	T	T	T	T	1	1	1	1	1	1	38	36	14	40	22	34	1	1	1	1	1	1	0	1	0.758621	0.566667	0.4375	0
40031275	A	G	G	G	G	G	G	1	1	1	1	1	1	54	44	18	48	49	27	0	1	1	1	1	1	1	0	1	0.266667	0.5	1
924518	T	G	G	G	G	G	G	1	1	1	1	1	1	34	23	22	42	39	47	0.8125	0.230769	1	1	1	1	0	0.5	1	0.972973	0.590909	0.677419
6042719	A	G	G	G	G	G	G	1	1	1	1	1	1	13	18	12	34	17	64	0	1	1	1	1	1	1	0.777778	0	1	0.612903	0.393939
16978077	T	C	C	C	C	C	C	1	1	1	1	1	1	112	106	36	35	30	33	0.651163	0.590909	0.538462	0.904762	0	1	1	0.454545	1	0.647887	1	1
44048022	A	G	G	G	G	G	G	1	1	1	1	1	1	46	27	13	19	18	23	1	0.6	1	0.947368	0.727273	0	1	0.466667	1	0.769231	0.785714	0.5
6605724	T	C	C	C	C	C	C	1	1	1	1	1	1	18	14	14	27	11	11	1	1	1	1	1	1	1	1	0.8	0	0	0
37861630	A	G	G	G	G	G	G	1	1	1	1	1	1	39	34	51	103	37	86	0.84	1	1	0	0.625	0	1	1	0.97561	0.36	1	1
14787572	C	A	A	A	A	A	A	1	1	1	1	1	1	34	40	18	30	28	24	0.555556	1	0.983871	1	0	1	0.612903	0.7	1	0.971429	0	1
5956104	T	C	C	C	C	C	C	1	1	1	1	1	1	35	38	67	80	28	188	0	1	1	1	1	1	0	1	0	1	1	0.833333
86619983	A	T	T	T	T	T	T	1	1	1	1	1	1	14	10	15	12	14	14	0	1	1	1	1	1	0	1	0	0.833333	1	1
86619997	G	A	A	A	A	A	A	1	1	1	1	1	1	18	11	16	17	16	14	0	1	1	1	1	1	0	1	0	0.833333	1	1
990404	A	G	G	G	G	G	G	1	1	1	1	1	1	23	29	35	39	45	54	1	1	1	0.916667	1	1	0.428571	0.277778	0.682927	0.461538	0.380952	0.685185
86619992	A	C	C	C	C	C	C	1	1	1	1	1	1	18	11	15	16	15	14	0	1	1	1	1	1	0	1	0	0.846154	1	1
45529368	A	G	G	G	G	G	G	1	1	1	1	1	1	248	178	106	177	41	57	1	0.767442	1	1	1	1	0.577778	0.391304	0	0.539394	0.571429	1
31849371	T	C	C	C	C	C	C	1	1	1	1	1	1	15	13	79	98	27	28	0.375	1	0.470588	1	0.555556	0.344828	0.585938	1	1	0.516129	1	1
49381192	G	T	T	T	T	T	T	1	1	1	1	1	1	229	154	189	164	186	264	1	1	1	0.973262	0.996633	1	0.364103	0.460251	0.623377	0.462766	0.486339	0.5
39141815	C	T	T	T	T	T	T	1	1	1	1	1	1	248	91	93	149	231	161	1	0.612903	1	1	1	1	0.639073	0	0.569892	0.511364	0.538462	1
34907858	G	C	C	C	C	C	C	1	1	1	1	1	1	19	19	13	13	43	13	0.428571	1	1	0.512195	1	1	1	0.5	0.342857	0.464286	0.625	1
25426263	T	C	C	C	C	C	C	1	1	1	1	1	1	559	308	260	414	260	55	1	1	1	1	1	1	0.263158	0.238095	0.186047	0.197842	1	1
25472311	A	G	G	G	G	G	G	1	1	1	1	1	1	547	77	52	42	69	147	1	1	0.301205	1	1	1	0.52381	0.408451	0.233333	0.431762	1	1
129534383	G	C	C	C	C	C	C	1	1	1	1	1	1	117	59	99	124	61	128	1	1	0.930233	1	1	1	0.431818	0.517241	0.408163	0	1	0.611111
5858734	C	T	T	T	T	T	T	1	1	1	1	1	1	30	10	12	45	32	78	1	1	1	1	1	1	1	0.185185	1	0	0.410256	0.333333
6042402	T	C	C	C	C	C	C	1	1	1	1	1	1	11	13	22	49	33	170	0	1	1	1	1	1	1	0.888889	1	0	0.666667	0.394737
66032257	A	G	G	G	G	G	G	1	1	1	1	1	1	49	38	30	33	29	35	0	1	1	1	1	1	0	1	0.4	1	0.566667	1
31842846	A	G	G	G	G	G	G	1	1	1	1	1	1	162	84	126	122	117	98	0.328125	1	0.503759	1	0.514925	0.486957	0.556338	1	1	0.6	1	1
15287852	G	A	A	A	A	A	A	1	1	1	1	1	1	218	135	58	117	93	79	0.382353	1	1	1	0.325843	1	0.428571	1	1	0.448529	1	0.408
39887063	T	C	C	C	C	C	C	1	1	1	1	1	1	348	341	288	423	214	387	1	1	0.996497	0.999046	1	1	1	0.537869	0.483146	0.500914	0	0.475947
28088949	T	C	C	C	C	C	C	1	1	1	1	1	1	42	30	15	30	27	30	1	1	1	0.266667	1	1	0.736842	0.6	0.777778	0.615385	1	0
99173766	T	C	C	C	C	C	C	1	1	1	1	1	1	152	69	41	74	66	52	1	1	1	1	1	0.428571	1	0.333333	0.142857	0.553571	0.538462	1
3818349	T	C	C	C	C	C	C	1	1	1	1	1	1	28	16	20	26	25	13	1	1	1	1	0	1	1	1	0	0	1	1
41636688	A	C	C	C	C	C	C	1	1	1	1	1	1	21	19	18	26	11	18	1	1	1	1	0	1	0	1	1	1	0	1
40410133	N	G	G	G	G	G	G	1	1	1	1	1	1	250	373	45	294	148	72	1	1	1	1	0	0	1	1	1	0	1	1
80940413	A	G	G	G	G	G	G	1	1	1	1	1	1	17	13	30	29	20	30	0	1	1	1	1	0	0	1	1	1	1	1
80940422	T	C	C	C	C	C	C	1	1	1	1	1	1	13	15	30	33	19	28	0	1	1	1	1	0	0	1	1	1	1	1
4256613	G	T	T	T	T	C	C	1	1	1	1	1	1	152	176	214	300	161	265	1	0	1	1	1	0	1	1	1	1	0	1
57516915	C	A	A	A	A	A	A	1	1	1	1	1	1	14	15	16	35	11	19	0	1	1	1	1	0	1	1	0	1	1	1
100476248	C	G	G	G	G	G	G	1	1	1	1	1	1	24	20	14	39	11	16	0	1	1	1	0	1	1	1	0	1	1	1
47814325	C	T	T	T	T	T	T	1	1	1	1	1	1	21	13	12	12	16	31	0	1	1	1	1	1	0	1	1	1	0	1
46171441	A	G	G	G	G	G	G	1	1	1	1	1	1	52	53	30	64	70	34	1	1	1	1	1	1	1	0	0	0	1	1
47166278	A	G	G	G	G	G	G	1	1	1	1	1	1	31	39	35	37	17	51	0	0	1	1	1	1	1	1	1	0	1	1
53470477	N	G	G	G	G	G	G	1	1	1	1	1	1	53	113	39	95	47	11	1	0	0	1	1	1	1	1	1	1	0	1
66294337	T	C	C	C	C	C	C	1	1	1	1	1	1	43	54	28	71	15	100	0	1	1	1	1	1	0	0	1	1	1	1
62080923	N	C	C	C	C	C	C	1	1	1	1	1	1	71	70	82	141	125	87	1	1	1	1	1	1	0	0	1	1	0	1
100071885	A	G	G	G	G	G	G	1	1	1	1	1	1	64	35	27	46	28	46	1	1	1	0	1	1	1	1	1	0	0	1
6133707	T	C	C	C	C	C	C	1	1	1	1	1	1	54	26	83	114	44	107	0.6	1	0.222222	0.833333	0.444444	1	1	1	0	1	0.918919	1
40048901	G	A	A	A	A	A	A	1	1	1	1	1	1	95	28	41	86	42	19	1	1	1	1	1	1	0.447368	0.280702	1	0.373333	0.518519	0.416667
58091360	A	G	G	G	G	G	G	1	1	1	1	1	1	83	25	29	21	19	21	0	1	1	0.96875	1	1	0.571429	1	1	1	0.5	0
80663731	C	T	T	T	T	T	T	1	1	1	1	1	1	202	89	66	139	80	97	0	1	1	0.965517	0.25	0.465116	0.622642	0.758621	1	1	1	1
35860795	T	C	C	C	C	C	C	1	1	1	1	1	1	17	21	22	44	14	13	1	1	1	1	1	1	0.4	1	0	0	1	0.666667
54027673	T	C	C	C	C	C	C	1	1	1	1	1	1	50	37	24	47	44	39	0	1	1	1	1	0.588235	1	0.916667	0	1	1	0.5625
99173826	A	G	G	G	G	G	G	1	1	1	1	1	1	129	68	40	70	47	48	1	1	1	1	1	0.425	1	0.382353	0.166667	0.561404	0.533333	1
32948788	G	C	C	C	C	C	C	1	1	1	1	1	1	282	138	103	132	74	203	1	1	1	1	0.985075	1	0.557292	0.608392	1	0.5	0.422535	0
18506993	T	C	C	C	C	C	C	1	1	1	1	1	1	40	31	21	43	38	56	1	1	1	1	1	1	0	0.173913	0.692308	0.8125	1	0.4
4793736	G	A	A	A	A	A	A	1	1	1	1	1	1	43	39	29	37	22	104	1	1	0.3	1	0.444444	1	0.75	1	0	1	0.589744	1
20798173	A	G	G	G	G	G	G	1	1	1	1	1	1	44	21	19	51	35	23	1	1	0.475	0.96875	0.916667	0.478261	1	0.826087	0.384615	0.478261	1	0.571429
42567540	A	G	G	G	G	G	G	1	1	1	1	1	1	30	20	13	24	20	10	0	1	1	1	1	1	1	1	0	0.6	0.5	1
25137684	T	C	C	C	C	C	C	1	1	1	1	1	1	50	10	38	71	44	39	1	0.277778	1	1	1	1	0.678571	0.411765	1	1	0.733333	0
74011681	G	T	T	T	T	T	T	1	1	1	1	1	1	145	122	78	126	69	127	1	1	1	1	1	1	0.552941	0.539474	1	0.5	0	0.512605
60220259	A	G	G	G	G	G	G	1	1	1	1	1	1	184	150	68	213	140	76	0.421053	1	1	0	1	0.446809	0.615385	1	1	1	0.62963	1
10635078	G	A	A	A	A	A	A	1	1	1	1	1	1	64	37	17	52	86	90	1	1	1	0.851852	1	1	1	0	1	0.44	0.555556	0.266667
33248710	T	C	C	C	C	C	C	1	1	1	1	1	1	14	35	27	72	22	71	1	1	1	1	1	1	0.555556	0.582278	0.477612	0.464286	0.529412	0.517483
10610507	T	C	C	C	C	C	C	1	1	1	1	1	1	66	24	23	36	13	23	0	1	0.444444	1	0.777778	0.75	0.6	1	1	1	1	0.558824
74011671	G	A	A	A	A	A	A	1	1	1	1	1	1	140	120	70	129	69	121	1	1	1	1	1	1	0.623529	0.552632	1	0.478261	0	0.491379
5333399	G	A	A	A	A	A	A	1	1	1	1	1	1	16	13	21	24	23	48	0	1	0.666667	1	1	1	0.5	1	1	1	0	1
61035493	G	C	C	C	C	C	C	1	1	1	1	1	1	56	40	32	47	36	13	0	0.6	0.5	0.428571	1	1	0.64	1	1	1	1	1
10610482	A	T	T	T	T	T	T	1	1	1	1	1	1	48	22	22	29	10	23	0	1	0.272727	1	0.714286	0.833333	0.75	1	1	1	1	0.62069
99167873	C	T	T	T	T	T	T	1	1	1	1	1	1	75	48	25	61	59	37	1	1	1	1	1	0.529412	1	0.434783	0.25	0.479167	0.5	1
27186443	T	C	C	C	C	C	C	1	1	1	1	1	1	584	697	247	724	393	360	1	0.996815	0.998405	0.406998	0.992126	1	0.427332	0.504425	0.445652	0.457103	1	1
48782052	T	C	C	C	C	C	C	1	1	1	1	1	1	60	18	29	39	31	56	1	0.416667	0.444444	1	0.866667	1	1	0.666667	1	0.4	1	0.444444
45357297	G	T	T	T	T	T	T	1	1	1	1	1	1	13	31	18	31	21	13	0.222222	1	0.636364	0.357143	1	0.4	1	1	0.625	1	1	1
29896568	G	A	A	A	A	A	A	1	1	1	1	1	1	13	24	12	12	10	12	0	0.533333	1	1	0.25	0.461538	1	1	1	1	1	1
63559720	C	T	T	T	T	T	T	1	1	1	1	1	1	17	24	11	14	19	10	1	1	0.533333	0.6	1	0	0.454545	1	1	1	1	0.657895
8868861	C	T	T	T	T	T	T	1	1	1	1	1	1	50	44	24	59	10	15	1	0	1	1	1	1	0	0.75	0.5	1	1	1
153589450	A	G	G	G	G	G	G	1	1	1	1	1	1	35	30	11	19	19	17	0	1	1	1	1	1	1	1	0	0.272727	1	1
118646131	G	A	A	A	A	A	A	1	1	1	1	1	1	25	34	11	27	10	27	0.833333	1	0.586207	1	0.416667	1	1	0.25	1	0.6875	0.5	1
99725167	T	C	C	C	C	C	C	1	1	1	1	1	1	25	29	11	16	10	21	1	1	1	0.6875	1	1	0.454545	0.472222	1	0.666667	0.48	0.525
66738793	G	T	T	T	T	T	T	1	1	1	1	1	1	70	60	43	44	64	55	1	1	1	1	1	0.421053	1	0.342593	0.521127	0.496241	0.527778	0.990566
45069327	C	T	T	T	T	T	T	1	1	1	1	1	1	39	41	20	38	40	56	0.644444	1	1	1	1	1	0	1	0.157895	1	0.5	1
45128222	A	G	G	G	G	G	G	1	1	1	1	1	1	20	16	21	30	21	21	0.625	0	1	0.96	0.571429	0.75	1	1	1	0.4	1	1
40051421	A	G	G	G	G	G	G	1	1	1	1	1	1	156	137	53	115	93	67	1	1	1	1	0.964912	1	0.381579	0.546392	1	0.505155	0.480392	0.43299
114450155	A	G	G	G	G	G	G	1	1	1	1	1	1	76	79	28	53	51	63	1	1	1	1	1	1	0.396552	1	0.4	0	1	0.547619
23072840	A	G	G	G	G	G	G	1	1	1	1	1	1	412	199	64	72	235	77	0.426471	0.457031	1	0.979592	0.981308	1	0.433673	1	1	0.523256	1	0.552239
82942793	C	T	T	T	T	T	T	1	1	1	1	1	1	30	20	16	22	23	14	0	0.636364	0.34375	1	1	0.375	1	1	1	1	1	1
6041872	C	T	T	T	T	T	T	1	1	1	1	1	1	15	13	38	97	50	106	1	1	1	1	1	1	1	0.636364	1	0	0.41791	0.324324
62266500	G	A	A	A	A	A	A	1	1	1	1	1	1	25	72	50	113	28	71	1	1	1	1	1	1	1	1	0	0.526316	0.446429	0.426471
70899483	G	A	A	A	A	A	A	1	1	1	1	1	1	53	21	23	53	30	29	0	0.4	1	1	1	1	1	1	1	1	0	1
40027523	C	T	T	T	T	T	T	1	1	1	1	1	1	33	18	22	31	14	23	1	1	1	1	1	1	1	0.3	0.4	0	0.705882	1
13454547	G	C	C	C	C	C	C	1	1	1	1	1	1	34	26	26	34	33	28	1	1	1	1	0.636364	1	0.5	0.153846	1	0.818182	1	0.3
36985157	G	A	A	A	A	A	A	1	1	1	1	1	1	95	20	17	32	62	17	1	1	0.935484	1	1	1	1	0.2	0.346154	0.42	0.513761	1
4793701	T	C	C	C	C	C	C	1	1	1	1	1	1	57	59	43	60	19	80	1	1	0.538462	1	0.52	1	0.741935	1	0	1	0.625	1
147019698	G	C	C	C	C	C	C	1	1	1	1	1	1	38	51	27	23	30	12	1	1	0.434783	1	1	1	0.625	0.542857	0.684211	1	0.5	0.642857
4794584	T	C	C	C	C	C	C	1	1	1	1	1	1	28	32	48	69	42	171	1	1	0.666667	1	0.454545	1	0.695652	1	0	1	0.615385	1
10610762	T	C	C	C	C	C	C	1	1	1	1	1	1	53	32	25	32	17	46	1	1	0.6	1	0.583333	0.4	0.454545	1	1	1	1	0.407407
97989779	A	G	G	G	G	G	G	1	1	1	1	1	1	61	57	42	64	38	63	1	1	0.346535	1	1	0.913043	0	0.333333	1	1	0.854545	1
53715597	C	T	T	T	T	T	T	1	1	1	1	1	1	35	45	36	99	25	118	1	1	1	0.996269	1	1	1	0.571429	0.352941	0.551724	0	0.97619
5857098	C	T	T	T	T	T	T	1	1	1	1	1	1	34	43	179	279	38	183	1	1	0.996503	0.985612	1	1	1	0.607004	0.968912	0	0.455621	0.444853
4793682	T	A	A	A	A	A	A	1	1	1	1	1	1	59	58	46	66	19	85	1	1	0.6	1	0.555556	1	0.710526	1	0	1	0.596154	1
103866283	A	G	G	G	G	G	G	1	1	1	1	1	1	73	32	16	78	26	21	1	1	1	0.851852	0.769231	0	0.3125	0.538462	1	1	1	1
18563180	C	A	A	A	A	A	A	1	1	1	1	1	1	34	35	61	73	26	44	1	1	1	1	1	1	0	1	1	0.5	1	0
9843074	C	A	A	A	A	A	A	1	1	1	1	1	1	16	19	15	32	17	58	0	1	1	1	1	0.5	1	1	0	1	1	1
75548953	C	G	G	G	G	G	G	1	1	1	1	1	1	26	18	16	14	25	25	0	1	1	1	1	1	1	0.5	0	1	1	1
103774807	A	G	G	G	G	G	G	1	1	1	1	1	1	28	34	22	28	19	24	0	1	1	1	1	1	0.5	1	0	1	1	1
76443129	A	G	G	G	G	G	G	1	1	1	1	1	1	25	28	16	27	19	25	0	0.571429	1	1	1	1	1	0.428571	1	0.5	1	1
59499518	T	G	G	G	G	G	G	1	1	1	1	1	1	54	27	20	49	22	61	0	1	1	1	1	1	1	1	1	0.727273	0.377049	0.403509
142986671	C	T	T	T	T	T	T	1	1	1	1	1	1	15	20	29	53	12	14	1	1	1	0	1	1	1	0.222222	0.789474	0.5	1	1
6040846	G	C	C	C	C	C	C	1	1	1	1	1	1	18	12	45	103	59	209	1	1	1	1	1	1	1	0.666667	1	0	0.462687	0.382353
15528034	T	C	C	C	C	C	C	1	1	1	1	1	1	44	28	20	14	19	28	0	1	0.37037	0.733333	1	0.416667	1	1	1	1	1	1
73980783	C	T	T	T	T	T	T	1	1	1	1	1	1	25	34	22	23	28	20	0	1	1	1	1	1	1	1	0	0.542857	1	1
24332834	A	T	T	T	T	T	T	1	1	1	1	1	1	22	11	17	15	17	10	1	1	1	1	1	1	0	1	1	1	0	0.545455
63983036	G	A	A	A	A	A	A	1	1	1	1	1	1	78	65	20	52	40	27	0	1	0.976744	0.954545	0.833333	1	1	1	0	1	1	0.785714
23310008	T	C	C	C	C	C	C	1	1	1	1	1	1	39	58	14	39	20	21	1	1	1	1	1	1	0	0.5625	1	1	1	0
51730156	C	G	G	G	G	G	G	1	1	1	1	1	1	117	70	45	55	26	46	1	0.568182	1	1	0.5	0.5	1	1	0	1	1	1
7842279	T	C	C	C	C	C	C	1	1	1	1	1	1	40	25	13	36	21	21	0.565217	1	1	1	1	0.363636	1	0.590909	0.8	1	0.25	1
15501431	G	A	A	A	A	A	A	1	1	1	1	1	1	57	38	39	22	35	11	0.338028	1	0	0.896907	1	0.340909	1	1	1	1	1	1
63983039	T	C	C	C	C	C	C	1	1	1	1	1	1	78	60	19	52	39	25	0	1	0.975	1	0.833333	1	1	1	0	1	1	0.769231
63983072	T	C	C	C	C	C	C	1	1	1	1	1	1	65	45	17	33	23	17	0	1	1	1	0.833333	1	1	1	0	1	1	0.75
63983073	G	C	C	C	C	C	C	1	1	1	1	1	1	56	46	16	32	23	18	0	1	1	1	0.833333	1	1	1	0	1	1	0.75
15355914	T	C	C	C	C	C	C	1	1	1	1	1	1	54	66	36	67	44	43	0.254545	1	0	0.96	1	0.376471	1	1	1	1	1	1
37084846	C	T	T	T	T	T	T	1	1	1	1	1	1	35	18	32	42	23	42	1	1	1	1	1	1	0	0.2	1	1	1	0.391304
5868217	A	G	G	G	G	G	G	1	1	1	1	1	1	113	58	30	60	34	32	0.318182	1	1	0	0.666667	0.611111	1	1	1	1	1	1
88894609	A	G	G	G	G	G	G	1	1	1	1	1	1	74	34	11	16	47	18	1	0.592593	1	1	1	0.62963	1	0	0.6	1	0.777778	1
83365680	G	A	A	A	A	A	A	1	1	1	1	1	1	467	45	36	64	210	134	0.838509	1	0.630542	1	1	0.612903	1	0.536842	0.396825	0.591549	1	1
27240153	T	C	C	C	C	C	C	1	1	1	1	1	1	629	630	216	461	374	328	1	1	1	0.526448	0.993939	1	0.520505	0.511945	0.56044	0.494272	1	1
29892875	A	G	G	G	G	G	G	1	1	1	1	1	1	42	13	21	58	17	25	0	1	1	1	1	1	1	0	1	1	0.615385	1
28400754	A	C	C	C	C	C	C	1	1	1	1	1	1	27	30	12	50	12	19	1	0.666667	1	1	1	1	1	1	0	0.416667	0.545455	1
41876582	C	T	T	T	T	T	T	1	1	1	1	1	1	40	16	15	31	20	34	1	1	1	1	1	0.666667	0.9	1	0	0.4	0.666667	1
13454204	C	A	A	A	A	A	A	1	1	1	1	1	1	46	35	34	23	37	30	1	1	1	1	0.727273	1	0.214286	0.517241	1	0.521739	1	0.655738
63983012	C	T	T	T	T	T	T	1	1	1	1	1	1	81	65	20	57	40	29	0	1	0.979592	1	0.8125	1	1	1	0	1	1	0.85
5855441	A	G	G	G	G	G	G	1	1	1	1	1	1	43	10	82	78	43	103	1	1	0.979592	1	1	1	1	0.625	1	0	0.587629	0.46789
63982998	A	G	G	G	G	G	G	1	1	1	1	1	1	86	65	29	64	38	29	0	1	0.980392	1	0.806452	1	1	1	0	1	1	0.875
78639194	C	T	T	T	T	T	T	1	1	1	1	1	1	38	35	20	33	10	11	1	0.727273	1	1	1	1	0.307692	1	0.8	0.294118	1	0.542857
101432744	C	T	T	T	T	T	T	1	1	1	1	1	1	54	15	17	34	13	22	1	0.5	0.363636	0.833333	1	1	1	0.571429	1	1	0.409091	1
5862192	A	G	G	G	G	G	G	1	1	1	1	1	1	11	20	26	52	17	89	1	1	1	1	1	1	1	0.596154	0.951613	0	0.597701	0.534884
53017099	A	G	G	G	G	G	G	1	1	1	1	1	1	149	218	66	125	74	68	1	1	1	1	0	0.991228	1	1	0.573034	0.526316	0.605505	1
15351304	T	C	C	C	C	C	C	1	1	1	1	1	1	27	18	16	28	17	27	0.2	1	0	1	1	0.5	1	1	1	1	1	1
95415383	C	T	T	T	T	T	T	1	1	1	1	1	1	58	34	23	17	21	25	1	0	1	0.857143	1	1	0.5	0.92	1	1	1	0.44186
48782209	C	T	T	T	T	T	T	1	1	1	1	1	1	63	33	31	34	26	24	1	1	0.419355	1	1	1	1	0.521739	0.782609	0.483871	1	0.526316
44841887	T	C	C	C	C	C	C	1	1	1	1	1	1	43	39	34	43	21	42	1	0.3	1	0.555556	0.5	0.416667	1	1	1	1	0.962963	1
58083541	A	G	G	G	G	G	G	1	1	1	1	1	1	72	64	40	70	28	24	1	1	1	1	1	1	1	0.472222	0.578947	0.56	0.6	0.527273
63982975	T	C	C	C	C	C	C	1	1	1	1	1	1	82	56	24	66	43	28	0	1	0.977778	1	0.84375	1	1	1	0	1	1	0.923077
28400753	C	T	T	T	T	T	T	1	1	1	1	1	1	27	35	12	50	14	19	1	0.666667	1	1	1	1	1	1	0	0.538462	0.545455	1
90743530	C	G	G	G	G	G	G	1	1	1	1	1	1	220	275	281	595	314	1113	1	1	1	1	1	1	0.76259	1	0.716981	0.7	0.571691	0
113039809	A	C	C	C	C	C	C	1	1	1	1	1	1	25	13	10	24	22	30	0	0.888889	1	1	1	1	0.875	1	0	1	1	1
5859127	G	C	C	C	C	C	C	1	1	1	1	1	1	34	26	87	93	45	182	1	1	1	1	1	1	1	0.616279	0.972603	0	0.612335	0.57265
21805642	G	A	A	A	A	A	A	1	1	1	1	1	1	107	60	21	52	44	23	1	1	1	1	1	1	1	0.586207	0	0.657143	1	0.538462
70300524	G	C	C	C	C	C	C	1	1	1	1	1	1	158	90	33	16	30	43	1	1	1	1	1	1	0	0.45122	1	1	1	0.351852
54917405	A	G	G	G	G	G	G	1	1	1	1	1	1	10	58	22	64	11	11	1	1	1	1	1	1	1	0	0	0.809524	1	1
59495004	T	C	C	C	C	C	C	1	1	1	1	1	1	489	301	357	644	203	361	1	1	1	0.395683	0.991597	1	1	1	0.987654	0.538462	0.415205	0.485849
91685900	A	G	G	G	G	G	G	1	1	1	1	1	1	83	80	23	104	57	90	0	0.964286	1	0.963636	1	1	1	0.928571	1	0	1	0.964286
52763545	A	G	G	G	G	G	G	1	1	1	1	1	1	35	36	12	33	10	12	0	1	1	1	1	1	1	1	0.5	0.333333	1	1
37759206	T	C	C	C	C	C	C	1	1	1	1	1	1	49	96	13	46	22	71	0.672414	1	1	1	1	1	0.789474	1	1	0.380952	1	0
6039689	C	T	T	T	T	T	T	1	1	1	1	1	1	27	64	89	143	71	277	1	1	1	0.96875	1	1	1	0.806452	1	0	0.598131	0.481013
72478665	A	T	T	T	T	T	T	1	1	1	1	1	1	39	21	18	13	34	57	0	1	1	1	1	1	1	0.875	0	1	1	1
69146062	A	G	G	G	G	G	G	1	1	1	1	1	1	50	42	42	43	49	21	1	1	1	1	1	1	0.42	0.462963	1	1	1	0
76988864	T	C	C	C	C	C	C	1	1	1	1	1	1	43	40	29	48	25	44	1	0.466667	1	1	1	1	1	0.425	1	0	1	1
97760718	T	C	C	C	C	C	C	1	1	1	1	1	1	14	20	16	28	18	31	1	0	1	0.894737	0	1	1	1	1	1	1	1
18416884	A	G	G	G	G	G	G	1	1	1	1	1	1	19	10	14	10	10	18	0	1	1	0.9	1	1	1	1	0	1	1	1
394266	C	G	G	G	G	G	G	1	1	1	1	1	1	30	32	15	29	15	15	0.833333	1	1	0.6	0	0.470588	1	1	1	1	1	1
27058381	G	A	A	A	A	A	A	1	1	1	1	1	1	53	27	28	34	35	38	0	1	1	1	1	1	1	1	0	1	0.909091	1
45068588	G	T	T	T	T	T	T	1	1	1	1	1	1	26	10	13	31	18	39	0	1	1	0.909091	1	1	0	1	1	1	1	1
30735828	T	C	C	C	C	C	C	1	1	1	1	1	1	54	51	23	56	55	98	1	1	1	1	1	1	0.2	0.512195	0.604651	0.6	1	1
63983089	G	C	C	C	C	C	C	1	1	1	1	1	1	45	50	16	23	22	23	0.333333	1	1	1	0.842105	1	1	1	0	1	1	0.75
47622344	T	C	C	C	C	C	C	1	1	1	1	1	1	31	25	14	27	24	31	1	1	1	1	1	1	0.684211	1	0.714286	0	1	0.53125
51764221	G	A	A	A	A	A	A	1	1	1	1	1	1	34	32	10	12	15	26	1	1	1	1	1	1	0.407407	1	0	1	1	0.529412
54125580	A	G	G	G	G	G	G	1	1	1	1	1	1	32	25	22	37	31	11	1	1	1	1	1	1	0.5	0.428571	0.615385	1	0.4	1
24634709	A	C	C	C	C	C	C	1	1	1	1	1	1	35	36	14	34	17	13	0	1	1	1	1	1	0.444444	1	1	0.5	1	1
11139502	T	C	C	C	C	C	C	1	1	1	1	1	1	173	100	118	149	213	139	0.379747	1	1	0.8125	1	1	1	1	0.645161	0.558824	0.548387	1
15408187	T	C	C	C	C	C	C	1	1	1	1	1	1	64	18	13	35	40	40	0.424242	1	0	1	0.935484	0.585714	1	1	1	1	1	1
32860464	G	A	A	A	A	A	A	1	1	1	1	1	1	86	76	71	108	56	45	1	1	1	1	1	1	0.602941	0.444444	0.423077	0.48	1	1
57408633	C	T	T	T	T	T	T	1	1	1	1	1	1	49	29	63	71	27	40	1	1	1	1	1	1	1	1	0.5	0	1	0.459016
63983095	T	C	C	C	C	C	C	1	1	1	1	1	1	36	49	18	27	20	21	0.333333	1	1	1	0.769231	1	1	1	0	1	1	0.857143
15209030	G	A	A	A	A	A	A	1	1	1	1	1	1	16	30	11	15	16	22	0.5	1	0	1	1	0.461538	1	1	1	1	1	1
79063171	C	G	G	G	G	G	G	1	1	1	1	1	1	47	45	60	53	26	14	1	1	1	1	1	1	1	0.55102	0.333333	1	0.511628	0.568627
28124740	A	G	G	G	G	G	G	1	1	1	1	1	1	2461	1398	278	1145	1326	455	1	1	0.998943	0.519817	1	1	0.524096	1	1	1	0.478632	0.444924
8970237	G	C	C	C	C	C	C	1	1	1	1	1	1	34	28	11	62	24	16	1	1	1	0.976744	1	1	0	1	1	1	1	0
39035909	A	G	G	G	G	G	G	1	1	1	1	1	1	193	86	45	120	119	80	1	1	1	0.990291	1	1	1	0	0	0.992481	1	1
15930208	T	C	C	C	C	C	C	1	1	1	1	1	1	74	43	39	84	55	41	1	1	1	1	1	0.473684	1	1	1	0	0.512195	1
13404962	T	C	C	C	C	C	C	1	1	1	1	1	1	111	45	40	52	40	31	1	1	1	0.986301	1	1	1	1	0	1	1	0
55309538	C	T	T	T	T	T	T	1	1	1	1	1	1	41	23	34	40	28	14	1	1	1	1	1	1	1	0.52	0	0.666667	0.8	1
60886808	T	C	C	C	C	C	C	1	1	1	1	1	1	13	18	12	28	14	12	1	1	1	1	0	1	1	1	0	1	1	1
112742799	A	G	G	G	G	G	G	1	1	1	1	1	1	14	17	11	15	29	12	1	1	1	1	1	0	1	1	0	1	1	1
8360734	A	G	G	G	G	G	G	1	1	1	1	1	1	26	32	21	17	20	29	1	1	1	1	1	1	0	1	1	1	1	0
38269507	A	G	G	G	G	G	G	1	1	1	1	1	1	11	19	10	23	10	26	1	1	1	1	1	1	1	0	1	1	1	0
26332890	T	C	C	C	C	C	C	1	1	1	1	1	1	40	35	24	34	18	31	0	1	1	1	1	1	1	1	0	1	1	1
26332926	T	C	C	C	C	C	C	1	1	1	1	1	1	36	21	18	28	16	17	0	1	1	1	1	1	1	1	0	1	1	1
26332935	C	T	T	T	T	T	T	1	1	1	1	1	1	31	18	15	19	12	17	0	1	1	1	1	1	1	1	0	1	1	1
26333754	T	C	C	C	C	C	C	1	1	1	1	1	1	22	32	21	31	17	52	0	1	1	1	1	1	1	0	1	1	1	1
26333784	A	G	G	G	G	G	G	1	1	1	1	1	1	24	33	17	30	15	50	0	1	1	1	1	1	1	0	1	1	1	1
49071109	T	C	C	C	C	C	C	1	1	1	1	1	1	15	33	12	26	12	12	0	1	1	1	1	1	1	1	0	1	1	1
49071118	T	C	C	C	C	C	C	1	1	1	1	1	1	18	31	14	26	12	12	0	1	1	1	1	1	1	1	0	1	1	1
49071354	A	T	T	T	T	T	T	1	1	1	1	1	1	10	19	15	21	18	23	0	1	1	1	1	1	1	1	0	1	1	1
73186646	G	C	C	C	C	C	C	1	1	1	1	1	1	22	46	13	62	23	25	1	1	1	1	1	1	0	1	1	1	0	1
17740808	T	C	C	C	C	C	C	1	1	1	1	1	1	16	35	39	23	32	33	0	1	1	1	1	1	1	1	0	1	1	1
43280413	G	T	T	T	T	T	T	1	1	1	1	1	1	48	18	10	18	16	17	1	1	1	1	1	1	1	1	0	1	0	1
51289376	A	G	G	G	G	G	G	1	1	1	1	1	1	10	11	28	37	14	34	1	1	1	1	1	1	0	0	1	1	1	1
2410798	A	G	G	G	G	G	G	1	1	1	1	1	1	14	13	14	26	13	22	0	1	1	1	1	1	0	1	1	1	1	1
2410882	G	C	C	C	C	C	C	1	1	1	1	1	1	12	16	28	26	11	34	0	1	1	1	1	1	0	1	1	1	1	1
2411010	T	C	C	C	C	C	C	1	1	1	1	1	1	11	11	10	12	15	31	0	1	1	1	1	1	1	0	1	1	1	1
2411011	C	A	A	A	A	A	A	1	1	1	1	1	1	10	11	11	12	14	30	0	1	1	1	1	1	1	0	1	1	1	1
9661530	T	C	C	C	C	C	C	1	1	1	1	1	1	15	25	28	48	15	40	0	1	1	1	1	1	0	1	1	1	1	1
20234813	C	T	T	T	T	T	T	1	1	1	1	1	1	76	21	11	40	38	27	0	1	1	1	1	1	1	1	0	1	1	1
55494338	G	C	C	C	C	C	C	1	1	1	1	1	1	32	25	11	18	11	11	0	1	1	1	1	1	1	1	0	1	1	1
10635377	T	C	C	C	C	C	C	1	1	1	1	1	1	46	11	15	43	33	30	1	1	1	1	1	1	0	0	1	1	1	1
43186495	A	G	G	G	G	G	G	1	1	1	1	1	1	75	80	29	68	46	92	0	1	1	1	1	1	1	1	0	1	1	1
47475088	T	C	C	C	C	C	C	1	1	1	1	1	1	22	48	29	19	18	28	0	1	1	1	1	1	1	1	0	1	1	1
49302227	T	G	G	G	G	G	G	1	1	1	1	1	1	34	34	11	61	29	44	1	1	1	1	1	1	1	1	0	0	1	1
13771533	G	A	A	A	A	A	A	1	1	1	1	1	1	16	20	17	11	17	15	0	1	1	1	1	1	1	1	0	1	1	1
17248629	A	G	G	G	G	G	G	1	1	1	1	1	1	43	30	19	38	26	13	1	1	1	1	1	1	0	1	0	1	1	1
23734740	C	G	G	G	G	G	G	1	1	1	1	1	1	34	13	21	37	10	41	0	1	1	1	1	1	1	1	0	1	1	1
23734748	G	A	A	A	A	A	A	1	1	1	1	1	1	32	12	21	38	11	43	0	1	1	1	1	1	1	1	0	1	1	1
13628380	G	C	C	C	C	C	C	1	1	1	1	1	1	26	17	16	31	17	12	0	1	1	1	1	1	1	1	0	1	1	1
13628386	G	A	A	A	A	A	A	1	1	1	1	1	1	32	21	20	39	20	15	0	1	1	1	1	1	1	1	0	1	1	1
49071118	T	C	C	C	C	C	C	1	1	1	1	1	1	18	31	14	26	12	12	0	1	1	1	1	1	1	1	0	1	1	1
72478692	C	T	T	T	T	T	T	1	1	1	1	1	1	40	21	15	13	34	57	0	1	1	1	1	1	1	1	0	1	1	1
72478695	A	G	G	G	G	G	G	1	1	1	1	1	1	39	19	13	13	32	55	0	1	1	1	1	1	1	1	0	1	1	1
72478701	T	C	C	C	C	C	C	1	1	1	1	1	1	39	19	13	13	31	54	0	1	1	1	1	1	1	1	0	1	1	1
99696323	A	G	G	G	G	G	G	1	1	1	1	1	1	13	23	20	42	11	34	0	1	1	1	1	1	1	1	0	1	1	1
113039811	G	T	T	T	T	T	T	1	1	1	1	1	1	24	13	10	24	22	28	0	1	1	1	1	1	1	1	0	1	1	1
90636601	G	C	C	C	C	C	C	1	1	1	1	1	1	21	17	28	20	20	30	1	1	1	1	1	1	1	1	0	1	0	1
108806492	G	A	A	A	A	A	A	1	1	1	1	1	1	26	17	13	11	16	30	0	1	1	1	1	1	1	1	0	1	1	1
14671891	T	C	C	C	C	C	C	1	1	1	1	1	1	36	24	10	33	14	42	0	1	1	1	1	1	1	1	0	1	1	1
14948830	C	T	T	T	T	T	T	1	1	1	1	1	1	64	41	49	89	58	85	0	1	1	1	1	1	1	1	0	1	1	1
14949071	C	T	T	T	T	T	T	1	1	1	1	1	1	52	40	25	58	40	32	0	1	1	1	1	1	1	1	0	1	1	1
14949339	T	C	C	C	C	C	C	1	1	1	1	1	1	29	29	23	40	12	22	0	1	1	1	1	1	1	1	0	1	1	1
14949354	A	G	G	G	G	G	G	1	1	1	1	1	1	24	20	19	35	11	14	0	1	1	1	1	1	1	1	0	1	1	1
77581399	A	G	G	G	G	G	G	1	1	1	1	1	1	47	11	15	30	43	14	1	1	1	0	1	1	1	1	0	1	1	1
30159445	G	T	T	T	T	T	T	1	1	1	1	1	1	31	18	21	47	23	20	1	0	1	1	1	1	1	1	1	1	0	1
60785867	G	A	A	A	A	A	A	1	1	1	1	1	1	20	19	14	18	21	15	1	1	1	1	1	1	1	1	1	0	0	1
80053318	C	T	T	T	T	T	T	1	1	1	1	1	1	34	23	32	30	18	25	0	1	1	1	1	1	1	1	0	1	1	1
50575498	C	T	T	T	T	T	T	1	1	1	1	1	1	14	16	17	28	15	15	0	1	1	1	1	1	0	1	1	1	1	1
50575582	A	G	G	G	G	G	G	1	1	1	1	1	1	20	31	28	32	13	22	0	1	1	1	1	1	1	1	0	1	1	1
57516434	T	C	C	C	C	C	C	1	1	1	1	1	1	41	42	16	20	12	11	0	1	1	1	1	1	1	1	0	1	1	1
57516883	A	C	C	C	C	C	C	1	1	1	1	1	1	28	21	13	32	10	14	0	1	1	1	1	1	1	1	0	1	1	1
66926817	A	G	G	G	G	G	G	1	1	1	1	1	1	62	78	22	57	31	39	0.333333	1	1	0.961538	0.708333	0	1	1	1	1	1	1
55669597	T	C	C	C	C	C	C	1	1	1	1	1	1	111	88	85	154	34	63	1	1	1	1	1	1	1	0.511905	0	1	0.493506	1
44255087	A	G	G	G	G	G	G	1	1	1	1	1	1	88	63	38	62	35	68	1	1	0.62963	1	1	1	0.411765	0.764706	0.923077	0.666667	0.615385	1
11049435	C	T	T	T	T	T	T	1	1	1	1	1	1	60	37	20	42	37	27	1	1	1	1	1	1	1	0.521739	0.4	0.333333	0.76	1
58608460	T	C	C	C	C	C	C	1	1	1	1	1	1	452	151	96	197	271	225	1	0.992063	1	0.990826	1	1	0	1	0.531915	1	1	0.518293
63901707	A	G	G	G	G	G	G	1	1	1	1	1	1	30	30	12	17	30	15	0	0.636364	1	1	1	1	0.411765	1	1	1	1	1
79578931	A	G	G	G	G	G	G	1	1	1	1	1	1	20	19	14	36	26	15	1	1	1	1	1	1	1	1	0	0.307692	0.75	1
15408282	A	G	G	G	G	G	G	1	1	1	1	1	1	102	63	23	51	87	94	0.4	1	0	1	1	0.686275	1	1	1	1	1	0.983051
66882964	A	G	G	G	G	G	G	1	1	1	1	1	1	1111	2516	363	619	738	171	1	0.998693	1	0.99696	1	1	1	0.496437	0.520607	0.52603	0.546039	1
35846046	G	A	A	A	A	A	A	1	1	1	1	1	1	76	49	18	30	25	14	0.545455	1	0.548387	1	0.416667	1	0.575	1	1	1	1	1
26735750	C	T	T	T	T	T	T	1	1	1	1	1	1	53	491	570	1181	94	4124	1	1	1	0.974093	0.5	1	1	0.654545	1	0.537313	0.425287	1
21700615	A	T	T	T	T	T	T	1	1	1	1	1	1	20	27	26	56	30	87	1	1	1	1	1	1	1	1	1	0.636364	0	0.459459
39650124	A	T	T	T	T	T	T	1	1	1	1	1	1	39	25	11	19	28	14	1	1	0	1	1	0.5	0.68	1	1	1	0.916667	1
75952881	T	C	C	C	C	C	C	1	1	1	1	1	1	24	18	19	32	17	46	1	1	1	1	1	1	1	0.625	0.75	0	0.722222	1
35861961	G	A	A	A	A	A	A	1	1	1	1	1	1	31	27	36	44	21	19	1	1	1	1	1	1	0.5	1	0.846154	0.294118	1	0.457143
57411338	T	C	C	C	C	C	C	1	1	1	1	1	1	27	30	24	48	14	50	1	1	1	1	1	1	1	1	0.666667	0	1	0.440678
6040486	T	C	C	C	C	C	C	1	1	1	1	1	1	60	24	46	108	58	198	1	1	1	1	1	1	1	0.633333	1	0.222222	0.674157	0.577778
52640669	G	T	T	T	T	T	T	1	1	1	1	1	1	77	35	34	73	43	58	1	1	0.433962	0.486111	1	1	1	0.210526	1	0.981481	1	1
15408371	C	T	T	T	T	T	T	1	1	1	1	1	1	109	88	25	48	105	101	0.545455	1	0	1	1	0.57971	1	1	1	1	1	1
124981585	A	G	G	G	G	G	G	1	1	1	1	1	1	85	62	27	93	60	98	1	1	1	1	1	1	0.575	1	0.567568	1	1	0
15408206	T	C	C	C	C	C	C	1	1	1	1	1	1	72	19	14	43	51	44	0.545455	1	0	1	0.964286	0.641026	1	1	1	1	1	1
61787871	G	A	A	A	A	A	A	1	1	1	1	1	1	92	34	53	108	51	120	1	1	1	1	1	1	1	0.636364	0.515152	0	1	1
6113596	T	C	C	C	C	C	C	1	1	1	1	1	1	64	34	109	171	58	194	1	1	0.791667	0.962963	0.898734	1	1	1	0	1	0.5	1
3582710	G	A	A	A	A	A	A	1	1	1	1	1	1	70	33	48	46	33	95	1	1	1	1	1	1	1	0.56	1	0.6	0	1
36623746	A	G	G	G	G	G	G	1	1	1	1	1	1	80	65	39	60	20	21	1	1	0.970149	1	1	1	1	0.52	0.615385	0.555556	0.5	1
8466172	A	G	G	G	G	G	G	1	1	1	1	1	1	13	23	23	23	26	34	1	1	1	1	1	0.272727	1	0.5	0.555556	1	0.833333	1
110194621	G	A	A	A	A	A	A	1	1	1	1	1	1	130	96	145	149	52	136	0	1	1	1	1	1	0.5	0.666667	1	1	1	1
15408244	C	G	G	G	G	G	G	1	1	1	1	1	1	92	51	19	54	79	73	0.5	1	0	1	0.979167	0.688889	1	1	1	1	1	1
15405607	A	G	G	G	G	G	G	1	1	1	1	1	1	108	76	37	55	75	75	0.625	1	0	1	0.953488	0.591549	1	1	1	1	1	1
17790974	A	G	G	G	G	G	G	1	1	1	1	1	1	32	28	24	26	33	43	1	1	1	0.985507	0.6	1	1	0.990826	0.846154	1	0.5	0.25
81576001	T	C	C	C	C	C	C	1	1	1	1	1	1	32	12	17	27	31	27	0	1	1	1	1	1	1	0.181818	1	1	1	1
15404720	A	G	G	G	G	G	G	1	1	1	1	1	1	59	49	11	42	49	35	0.5	1	0	1	0.967742	0.725	1	1	1	1	1	1
90811669	C	T	T	T	T	T	T	1	1	1	1	1	1	10	27	19	34	62	208	1	1	1	1	1	1	0.2	1	1	1	1	0
90811672	G	C	C	C	C	C	C	1	1	1	1	1	1	10	28	19	35	65	205	1	1	1	1	1	1	0.2	1	1	1	1	0
15404930	A	G	G	G	G	G	G	1	1	1	1	1	1	93	60	24	56	60	84	0.583333	1	0	0.964286	1	0.653061	1	1	1	1	1	1
15408255	T	C	C	C	C	C	C	1	1	1	1	1	1	88	49	20	47	76	75	0.533333	1	0	1	0.978261	0.704545	1	0.987342	1	1	1	1
2869042	T	C	C	C	C	C	C	1	1	1	1	1	1	66	75	30	47	47	66	0	1	1	1	0.607143	1	1	1	1	0.6	1	1
59550660	A	G	G	G	G	G	G	1	1	1	1	1	1	49	42	14	38	20	11	1	1	1	1	0	1	1	1	0.65	1	0.565217	1
46306975	A	G	G	G	G	G	G	1	1	1	1	1	1	20	13	13	16	27	55	0	1	1	1	1	1	1	1	0.222222	1	1	1
102665796	G	C	C	C	C	C	C	1	1	1	1	1	1	54	51	28	39	37	24	1	1	1	1	1	1	1	0.587302	0.333333	0.591837	0.714286	1
3759136	G	A	A	A	A	A	A	1	1	1	1	1	1	128	97	78	105	49	82	1	1	1	1	0.37931	0.428571	1	0.424242	1	1	1	1
15408075	T	C	C	C	C	C	C	1	1	1	1	1	1	101	53	61	54	96	73	0.66129	1	0	0.977528	0.990385	0.623188	1	1	1	1	1	1
47267837	C	T	T	T	T	T	T	1	1	1	1	1	1	89	85	57	69	23	44	1	0.34	1	0.987654	0.507937	1	1	0.425743	1	1	1	1
43793863	T	C	C	C	C	C	C	1	1	1	1	1	1	36	29	26	53	32	22	1	1	1	1	0	1	1	1	1	1	1	0.269231
80661892	G	A	A	A	A	A	A	1	1	1	1	1	1	43	41	25	36	36	49	0	1	1	1	1	1	0.7	0.576923	1	1	1	1
80661899	T	C	C	C	C	C	C	1	1	1	1	1	1	41	38	28	38	38	51	0	1	1	1	1	1	0.722222	0.576923	1	1	1	1
14166439	T	C	C	C	C	C	C	1	1	1	1	1	1	16	10	11	30	10	40	1	1	1	1	1	1	0	0.875	1	1	0.428571	1
15974740	G	C	C	C	C	C	C	1	1	1	1	1	1	66	20	27	58	31	53	1	1	1	1	1	0.444444	1	0.6	1	1	0.538462	0.724138
27573942	C	G	G	G	G	G	G	1	1	1	1	1	1	67	64	26	57	47	82	1	1	1	1	1	1	0.666667	0.4375	0.714286	0.5	1	1
24256699	A	G	G	G	G	G	G	1	1	1	1	1	1	51	49	43	54	35	45	1	0.409091	1	1	1	1	0.346154	1	1	1	1	0.575758
1722551	T	C	C	C	C	C	C	1	1	1	1	1	1	60	28	22	64	60	33	1	1	1	1	1	1	1	1	0.6	0.56	0.444444	0.727273
35845589	G	T	T	T	T	T	T	1	1	1	1	1	1	51	50	35	66	21	18	0.666667	0.8	0.631579	1	0.5625	1	0.684211	1	1	1	1	1
4414496	C	A	A	A	A	A	A	1	1	1	1	1	1	51	57	54	58	28	46	0.617021	1	1	1	0.75	0.684211	0.7	0.6	1	1	1	1
70217469	G	T	T	T	T	T	T	1	1	1	1	1	1	22	32	11	100	117	103	1	1	1	1	1	1	0.446429	0	0.925926	1	1	0.990566
15517983	C	T	T	T	T	T	T	1	1	1	1	1	1	17	26	20	22	19	10	0.846154	1	0	1	1	0.529412	1	1	1	1	1	1
15408040	A	C	C	C	C	C	C	1	1	1	1	1	1	120	66	67	59	103	82	0.75	1	0	0.981818	0.990991	0.664122	1	1	1	0.995708	1	1
15434169	G	A	A	A	A	A	A	1	1	1	1	1	1	100	67	20	82	61	75	0.866667	1	0	1	0.971429	0.5625	1	1	1	1	1	1
46550309	A	G	G	G	G	G	G	1	1	1	1	1	1	105	44	33	50	50	41	1	1	1	1	1	1	0.392857	0.566038	1	0.964912	0.478261	1
33988859	A	G	G	G	G	G	G	1	1	1	1	1	1	113	85	60	87	32	16	1	1	1	1	1	1	0	1	1	1	1	0.402299
17276227	G	A	A	A	A	A	A	1	1	1	1	1	1	22	15	29	37	17	19	1	1	1	1	1	1	1	0.428571	0.666667	0.307692	1	1
24256698	C	G	G	G	G	G	G	1	1	1	1	1	1	52	49	44	56	35	46	1	0.4	1	1	1	1	0.4	1	1	1	1	0.606061
21672185	T	G	G	G	G	G	G	1	1	1	1	1	1	59	29	19	41	46	16	1	1	0.935484	1	1	1	1	0	0.529412	0.945946	1	1
11049164	A	G	G	G	G	G	G	1	1	1	1	1	1	65	52	38	65	58	53	1	1	1	1	1	1	1	0.466667	0.62963	0.6	0.722222	1
99905287	T	G	G	G	G	G	G	1	1	1	1	1	1	21	12	18	61	23	82	1	1	1	1	1	1	0.916667	0.970588	0.787879	0	0.85	0.894737
47268097	G	C	C	C	C	C	C	1	1	1	1	1	1	180	127	30	91	106	45	1	0.490196	1	1	0.540984	1	0.989011	0.4	1	1	1	1
15431164	A	G	G	G	G	G	G	1	1	1	1	1	1	75	40	44	52	23	38	0.909091	1	0	0.947368	1	0.571429	1	1	1	1	1	1
11048940	T	C	C	C	C	C	C	1	1	1	1	1	1	95	84	63	108	49	75	1	1	1	0.973684	1	1	1	0.526316	0.708333	0.594595	0.632653	1
47268222	A	G	G	G	G	G	G	1	1	1	1	1	1	149	101	27	80	80	52	1	0.469136	1	1	0.634146	1	1	0.333333	1	1	1	1
70232601	A	G	G	G	G	G	G	1	1	1	1	1	1	18	24	13	17	30	72	1	1	1	1	1	1	0.441176	0	1	1	1	1
15974316	A	G	G	G	G	G	G	1	1	1	1	1	1	23	27	18	36	29	49	1	1	1	0.96	1	0.5	1	0.666667	1	1	0.633333	0.6875
28580502	G	A	A	A	A	A	A	1	1	1	1	1	1	99	22	42	50	39	34	1	1	1	1	1	1	0.6	0.7	0.576923	0.571429	1	1
28136708	A	G	G	G	G	G	G	1	1	1	1	1	1	839	303	131	261	362	250	1	1	1	1	1	1	0.513333	1	1	1	0.483146	0.456311
61788027	G	A	A	A	A	A	A	1	1	1	1	1	1	50	49	51	89	41	29	0.982456	1	1	1	1	1	1	0.512821	0.483871	0.478261	1	1
107841605	T	C	C	C	C	C	C	1	1	1	1	1	1	33	59	18	54	28	33	1	1	1	1	1	1	1	1	0	0.461538	1	1
24963335	A	G	G	G	G	G	G	1	1	1	1	1	1	220	169	100	107	138	42	0.848485	1	0.651515	1	0.802326	0.760563	0.894366	0.793814	0.828125	0.891892	1	1
63982803	T	C	C	C	C	C	C	1	1	1	1	1	1	41	19	13	33	21	10	0	0.928571	0.869565	1	0.733333	1	1	1	1	1	1	0.941176
60494720	T	C	C	C	C	C	C	1	1	1	1	1	1	272	232	61	155	95	34	1	1	1	1	1	1	0.549296	1	0.553191	1	0.375	1
26104189	G	A	A	A	A	A	A	1	1	1	1	1	1	37	33	31	34	26	15	0.478261	1	0.333333	0.703704	1	1	1	1	1	0.971429	1	1
59285167	A	G	G	G	G	G	G	1	1	1	1	1	1	29	45	22	23	39	58	1	1	0.6	1	0.461538	1	1	1	1	1	0.434783	1
56429867	A	G	G	G	G	G	G	1	1	1	1	1	1	65	40	10	20	27	10	1	1	0.5	1	0	1	1	1	1	1	1	1
11884745	T	C	C	C	C	C	C	1	1	1	1	1	1	179	162	71	170	103	94	1	1	1	1	1	1	1	1	1	0.5	0.75	0.25
22142241	T	C	C	C	C	C	C	1	1	1	1	1	1	17	17	11	19	22	26	0	1	1	1	1	1	1	1	1	1	1	0.5
9999677	N	T	T	T	T	T	T	1	1	1	1	1	1	54	45	55	82	26	55	1	0	1	1	1	1	0.5	1	1	1	1	1
80661755	T	C	C	C	C	C	C	1	1	1	1	1	1	70	79	27	41	36	39	0	1	1	1	1	1	1	0.5	1	1	1	1
26809467	C	A	A	A	A	A	A	1	1	1	1	1	1	45	48	37	77	49	33	1	1	1	1	1	1	1	0.25	0.577778	0.68	1	1
11376768	A	T	T	T	T	T	T	1	1	1	1	1	1	20	10	11	22	15	33	0	1	1	1	1	1	1	1	1	1	0.625	0.888889
27038516	T	C	C	C	C	C	C	1	1	1	1	1	1	78	50	21	73	59	44	0	0.533333	1	1	1	1	1	1	1	1	1	1
90811419	C	T	T	T	T	T	T	1	1	1	1	1	1	67	15	16	34	103	221	1	1	1	1	1	1	0.555556	1	1	1	1	0
46715558	A	G	G	G	G	G	G	1	1	1	1	1	1	52	31	22	84	39	92	1	1	1	1	0.909091	1	0.772727	0.5	1	1	0.375	1
77196724	T	C	C	C	C	C	C	1	1	1	1	1	1	41	35	14	27	15	17	1	1	1	1	1	1	1	1	1	0.608696	0.5625	0.387097
26538955	T	C	C	C	C	C	C	1	1	1	1	1	1	31	39	21	24	32	16	0	1	1	1	1	0.857143	1	1	1	0.933333	1	0.777778
36244052	G	A	A	A	A	A	A	1	1	1	1	1	1	114	60	48	108	41	85	1	1	1	0.955357	0.457627	0.597222	0.5625	1	1	1	1	1
47268368	G	A	A	A	A	A	A	1	1	1	1	1	1	94	92	40	54	86	32	1	0.507463	1	1	0.433962	1	1	0.631579	1	1	1	1
2329172	G	A	A	A	A	A	A	1	1	1	1	1	1	54	34	26	65	17	12	1	1	1	1	1	1	1	1	0	0.966667	0.62	1
60651466	T	C	C	C	C	C	C	1	1	1	1	1	1	61	34	24	47	15	45	1	1	1	1	1	1	0	1	1	1	0.6	1
65102998	T	C	C	C	C	C	C	1	1	1	1	1	1	105	83	39	90	55	52	1	1	1	0.989583	1	0.507246	1	1	1	0.52381	0.581395	1
63982902	T	C	C	C	C	C	C	1	1	1	1	1	1	31	34	20	44	29	19	0	1	0.967742	1	0.684211	1	1	1	1	1	1	0.954545
37155048	T	C	C	C	C	C	C	1	1	1	1	1	1	47	31	14	25	28	20	1	1	1	1	1	1	1	1	0.333333	1	0.384615	0.888889
127816585	G	A	A	A	A	A	A	1	1	1	1	1	1	46	33	19	46	47	48	1	1	1	1	0.315789	1	1	1	0.612903	0.68	1	1
65497483	T	C	C	C	C	C	C	1	1	1	1	1	1	129	95	52	140	86	141	0	1	1	0.97561	1	1	1	0.639344	1	1	1	1
61631748	T	C	C	C	C	C	C	1	1	1	1	1	1	17	12	12	20	13	24	1	1	1	1	1	1	1	1	1	1	0.615385	0
21399811	C	G	G	G	G	G	G	1	1	1	1	1	1	76	47	26	75	27	31	1	1	1	1	1	1	0.513514	1	0.96	0.646154	1	0.5
63982912	T	C	C	C	C	C	C	1	1	1	1	1	1	34	32	17	45	34	18	0	1	1	1	0.666667	1	1	1	1	1	1	0.954545
80662399	G	A	A	A	A	A	A	1	1	1	1	1	1	60	52	31	62	55	76	0	1	1	1	1	1	0.875	0.75	1	1	1	1
119232510	C	A	A	A	A	A	A	1	1	1	1	1	1	22	15	24	39	11	62	0.181818	1	1	0.45	1	1	1	1	1	1	1	1
31943798	C	T	T	T	T	T	T	1	1	1	1	1	1	10	17	11	43	11	17	1	1	1	1	1	1	0.204082	1	1	0.428571	1	1
75567831	A	G	G	G	G	G	G	1	1	1	1	1	1	53	44	12	45	26	68	1	1	1	1	1	1	1	0.647059	0	1	1	1
44411262	A	G	G	G	G	G	G	1	1	1	1	1	1	115	89	26	73	105	30	0	1	1	1	1	0.647059	1	1	1	1	1	1
80662423	C	G	G	G	G	G	G	1	1	1	1	1	1	62	50	24	57	49	70	0	1	1	1	1	1	0.851852	0.8	1	1	1	1
13825665	G	A	A	A	A	A	A	1	1	1	1	1	1	65	47	10	61	44	81	1	1	1	0.56	1	0.5625	1	1	1	1	0.538462	1
97532073	A	G	G	G	G	G	G	1	1	1	1	1	1	38	17	42	19	13	30	1	1	1	1	1	1	0	1	1	1	0.666667	1
39436783	T	C	C	C	C	C	C	1	1	1	1	1	1	75	47	50	72	47	95	1	1	0.521739	0.533333	0.616667	1	1	1	1	1	1	1
57277917	C	A	A	A	A	A	A	1	1	1	1	1	1	30	21	52	70	11	13	1	1	0.428571	1	1	0.25	1	1	1	1	1	1
11376782	C	T	T	T	T	T	T	1	1	1	1	1	1	26	15	11	23	15	41	0	1	1	1	1	1	1	1	1	1	0.777778	0.909091
61517215	A	C	C	C	C	C	C	1	1	1	1	1	1	29	19	12	16	12	18	1	1	1	1	1	0.333333	1	0.666667	1	1	1	0.7
51687270	G	A	A	A	A	A	A	1	1	1	1	1	1	109	84	45	71	49	89	1	1	1	1	1	0.939394	0.942857	0.869565	0.8	0.846154	0.969697	0.333333
75877164	T	C	C	C	C	C	C	1	1	1	1	1	1	22	24	13	34	14	16	1	0.714286	1	1	1	1	1	1	1	0.558824	0.434783	1
57668362	A	T	T	T	T	T	T	1	1	1	1	1	1	38	14	45	36	12	23	0	1	1	1	1	1	1	1	1	0.8125	1	0.909091
58092016	C	T	T	T	T	T	T	1	1	1	1	1	1	143	17	31	51	22	56	1	1	1	1	1	1	0.545455	1	1	1	0.428571	0.75
60495439	T	C	C	C	C	C	C	1	1	1	1	1	1	434	471	110	161	96	46	1	1	1	1	1	1	0.572687	1	0.589354	1	0.562232	1
53062378	G	A	A	A	A	A	A	1	1	1	1	1	1	74	55	45	54	19	42	1	1	1	1	1	1	0.393939	1	1	1	0.333333	1
20994262	T	C	C	C	C	C	C	1	1	1	1	1	1	26	24	10	24	28	23	0	0.962963	1	1	1	1	1	0.857143	1	1	1	0.913043
114336468	A	C	C	C	C	C	C	1	1	1	1	1	1	46	40	17	31	30	11	1	1	1	0.470588	0.285714	1	1	1	0.978261	1	1	1
109162927	C	T	T	T	T	T	T	1	1	1	1	1	1	11	27	14	25	13	22	0	1	1	1	1	1	0.857143	1	1	1	1	0.888889
109162931	T	C	C	C	C	C	C	1	1	1	1	1	1	11	27	14	25	13	22	0	1	1	1	1	1	0.857143	1	1	1	1	0.888889
109162932	G	A	A	A	A	A	A	1	1	1	1	1	1	11	26	14	25	13	22	0	1	1	1	1	1	0.857143	1	1	1	1	0.888889
63982927	A	G	G	G	G	G	G	1	1	1	1	1	1	27	31	14	37	31	10	0	1	1	1	0.833333	1	1	1	1	1	1	0.913043
90811767	G	A	A	A	A	A	A	1	1	1	1	1	1	22	25	12	26	55	142	1	1	1	1	1	1	0.75	1	1	1	1	0
92296998	C	T	T	T	T	T	T	1	1	1	1	1	1	13	10	14	24	19	19	1	1	1	1	1	1	1	0.75	0	1	1	1
9372226	T	A	A	A	A	A	A	1	1	1	1	1	1	29	16	12	39	17	38	1	1	1	1	1	1	1	1	0	1	0.75	1
20994295	G	C	C	C	C	C	C	1	1	1	1	1	1	26	23	11	29	29	24	0	1	1	1	1	1	1	0.8125	1	1	1	0.958333
11376759	G	A	A	A	A	A	A	1	1	1	1	1	1	21	11	11	20	15	33	0	1	1	1	1	1	1	1	1	1	0.777778	1
53978338	C	T	T	T	T	T	T	1	1	1	1	1	1	73	32	36	64	52	65	1	1	1	1	1	1	0.428571	1	1	1	1	0.361702
85901589	T	C	C	C	C	C	C	1	1	1	1	1	1	113	50	27	95	78	97	1	0.415385	1	0.989583	0.980769	0.486842	1	1	0.953488	1	0.979592	0.985294
49779023	A	C	C	C	C	C	C	1	1	1	1	1	1	38	10	11	28	18	60	1	1	1	0.44	1	0.9375	0.416667	1	1	1	1	1
26098975	A	T	T	T	T	T	T	1	1	1	1	1	1	218	134	105	190	125	112	1	1	0.99187	1	1	1	1	1	1	0.393443	1	0.410959
2535	T	C	C	C	C	C	C	1	1	1	1	1	1	176	187	23	205	68	85	1	1	0.555556	1	1	1	0.993464	0.25	1	1	1	1
29896943	C	T	T	T	T	T	T	1	1	1	1	1	1	22	30	20	11	13	18	1	1	1	1	0.8	1	1	1	0	1	1	1
27058350	C	T	T	T	T	T	T	1	1	1	1	1	1	51	23	27	28	30	39	1	1	1	1	1	1	1	0.925926	0	1	0.875	1
10610542	A	G	G	G	G	G	G	1	1	1	1	1	1	57	18	14	28	14	23	1	1	0.578947	0.933333	1	1	0.666667	1	1	1	1	0.625
109162918	C	T	T	T	T	T	T	1	1	1	1	1	1	11	26	13	25	13	22	0	1	1	1	1	1	0.923077	1	1	1	1	0.888889
40771351	T	C	C	C	C	C	C	1	1	1	1	1	1	49	23	18	43	20	20	1	1	1	1	1	1	1	1	0.8125	1	1	0
20994328	C	T	T	T	T	T	T	1	1	1	1	1	1	23	26	11	26	26	20	0	1	1	1	1	1	1	0.8125	1	1	1	1
29896960	A	G	G	G	G	G	G	1	1	1	1	1	1	25	27	18	10	13	12	1	1	1	1	0.818182	1	1	1	0	1	1	1
112710207	A	G	G	G	G	G	G	1	1	1	1	1	1	26	15	14	39	29	17	1	0.9	1	1	1	1	1	1	0	0.923077	1	1
11884787	C	T	T	T	T	T	T	1	1	1	1	1	1	157	147	63	164	89	89	1	1	1	1	1	1	1	1	1	0.5	1	0.333333
17228830	T	C	C	C	C	C	C	1	1	1	1	1	1	21	10	15	31	17	15	0	1	1	1	1	1	0.833333	1	1	1	1	1
95798657	G	A	A	A	A	A	A	1	1	1	1	1	1	25	30	14	21	13	19	0	1	1	0.833333	1	1	1	1	1	1	1	1
97405949	A	G	G	G	G	G	G	1	1	1	1	1	1	32	21	19	23	26	40	1	1	1	1	1	1	0	1	1	1	0.833333	1
48829201	T	C	C	C	C	C	C	1	1	1	1	1	1	30	13	13	21	16	12	1	1	1	0.666667	1	1	0.952381	1	1	1	0.727273	0.5
80536985	G	A	A	A	A	A	A	1	1	1	1	1	1	71	53	38	91	48	57	1	1	1	0.984615	1	1	0.511111	0.352941	1	1	1	1
119233034	G	A	A	A	A	A	A	1	1	1	1	1	1	42	41	49	71	15	41	0.461538	1	1	0.391304	1	1	1	1	1	1	1	1
30023788	A	C	C	C	C	C	C	1	1	1	1	1	1	18	35	10	12	17	15	1	1	1	1	1	1	1	0.857143	0	1	1	1
109162937	C	T	T	T	T	T	T	1	1	1	1	1	1	11	29	14	27	14	21	0	1	1	1	1	1	0.857143	1	1	1	1	1
49302510	G	C	C	C	C	C	C	1	1	1	1	1	1	80	49	18	95	50	88	0	1	1	1	1	1	0.888889	1	1	1	1	0.971429
16759326	C	T	T	T	T	T	T	1	1	1	1	1	1	29	38	17	50	12	15	1	0.666667	1	1	1	1	1	0.695652	1	0.5	1	1
80536994	T	C	C	C	C	C	C	1	1	1	1	1	1	74	48	32	88	47	58	1	1	1	0.984615	1	1	0.536585	0.342857	1	1	1	1
26333391	T	C	C	C	C	C	C	1	1	1	1	1	1	43	14	11	34	41	40	0	1	1	1	0.866667	1	1	1	1	1	1	1
49302511	G	A	A	A	A	A	A	1	1	1	1	1	1	78	50	19	97	47	88	0	1	0.977778	1	1	1	0.888889	1	1	1	1	1
10634955	C	T	T	T	T	T	T	1	1	1	1	1	1	61	33	26	57	70	104	1	1	1	1	1	1	1	1	0	1	1	0.875
4752897	A	G	G	G	G	G	G	1	1	1	1	1	1	15	17	10	25	11	15	1	0	1	1	1	1	0.875	1	1	1	1	1
50562361	T	C	C	C	C	C	C	1	1	1	1	1	1	35	21	17	47	14	35	0.875	1	1	1	1	1	1	1	0	1	1	1
17952986	T	C	C	C	C	C	C	1	1	1	1	1	1	46	21	14	48	22	10	0	1	1	0.952381	1	1	1	1	1	1	1	0.923077
135155922	A	G	G	G	G	G	G	1	1	1	1	1	1	33	38	16	26	16	33	1	1	1	1	1	1	1	0.931034	0	1	0.952381	1
100490860	A	T	T	T	T	T	T	1	1	1	1	1	1	49	40	38	24	19	17	1	1	1	1	1	0.982143	1	0.539474	1	1	1	0.367089
86767136	T	C	C	C	C	C	C	1	1	1	1	1	1	75	35	17	36	31	50	0	1	1	1	1	1	1	1	1	0.962963	1	0.928571
109162960	C	T	T	T	T	T	T	1	1	1	1	1	1	13	33	29	37	14	24	0	1	1	1	1	1	0.894737	1	1	1	1	1
97070420	G	A	A	A	A	A	A	1	1	1	1	1	1	21	27	17	29	16	12	0	1	1	1	1	1	1	1	1	1	0.9	1
87280422	G	A	A	A	A	A	A	1	1	1	1	1	1	61	46	35	129	48	109	0.9	0	1	1	1	1	1	1	1	1	1	1
14193861	G	T	T	T	T	T	T	1	1	1	1	1	1	70	138	169	275	118	232	1	1	1	1	1	1	0.496086	0.996774	1	1	0.413043	0.994737
99483741	T	G	G	G	G	G	G	1	1	1	1	1	1	64	56	26	76	37	65	1	0.970588	0.971429	1	1	1	1	1	0	0.96	1	1
80053595	T	C	C	C	C	C	C	1	1	1	1	1	1	51	25	32	56	26	55	0	1	1	0.970588	1	1	1	1	1	1	1	0.933333
135155911	T	C	C	C	C	C	C	1	1	1	1	1	1	24	31	17	25	14	31	1	1	1	1	1	1	1	0.958333	0	1	0.95	1
87280419	G	A	A	A	A	A	A	1	1	1	1	1	1	61	47	38	131	49	107	0.909091	0	1	1	1	1	1	1	1	1	1	1
55592060	C	T	T	T	T	T	T	1	1	1	1	1	1	31	34	21	40	42	73	1	1	1	1	1	1	1	1	0	0.954545	0.954545	1
12908105	T	C	C	C	C	C	C	1	1	1	1	1	1	111	66	34	56	37	41	1	1	0.486957	0.452055	1	1	1	0.971429	1	1	1	1
49302475	C	G	G	G	G	G	G	1	1	1	1	1	1	98	59	28	98	55	99	0	1	1	1	1	1	0.913043	1	1	1	1	1
47268306	A	G	G	G	G	G	G	1	1	1	1	1	1	132	88	25	68	79	33	1	1	1	1	0.517857	1	1	0.395349	1	1	1	1
54307382	T	G	G	G	G	G	G	1	1	1	1	1	1	125	63	33	64	24	96	1	1	1	1	1	1	1	1	1	0.538462	1	0.375
49071676	T	C	C	C	C	C	C	1	1	1	1	1	1	16	16	12	10	10	15	0	1	1	1	1	1	1	1	1	1	0.916667	1
28834892	T	C	C	C	C	C	C	1	1	1	1	1	1	49	19	24	53	16	12	0	1	1	1	1	1	1	1	1	1	0.916667	1
4005628	T	C	C	C	C	C	C	1	1	1	1	1	1	20	22	15	16	15	72	0	1	1	1	0.916667	1	1	1	1	1	1	1
61557046	C	T	T	T	T	T	T	1	1	1	1	1	1	40	20	13	19	30	22	0	1	1	1	1	1	1	1	1	1	1	0.923077
50435341	A	G	G	G	G	G	G	1	1	1	1	1	1	175	139	98	105	94	103	1	1	0.53271	1	1	1	0.39375	1	1	1	1	1
14948330	T	C	C	C	C	C	C	1	1	1	1	1	1	62	30	37	63	46	50	0	1	1	1	1	0.928571	1	1	1	1	1	1
44410585	T	A	A	A	A	A	A	1	1	1	1	1	1	105	56	54	88	99	105	0	0.983051	1	0.962963	1	1	0.986301	1	1	1	1	1
40214865	T	C	C	C	C	C	C	1	1	1	1	1	1	12	10	10	53	46	39	1	0.933333	1	1	1	1	1	1	1	1	0	1
2410922	A	T	T	T	T	T	T	1	1	1	1	1	1	10	17	21	25	13	36	0	1	1	0.9375	1	1	1	1	1	1	1	1
32861013	A	G	G	G	G	G	G	1	1	1	1	1	1	32	41	10	23	22	21	1	1	1	1	1	1	0.9375	1	0	1	1	1
60216448	A	G	G	G	G	G	G	1	1	1	1	1	1	272	503	234	298	131	85	1	1	1	0.494424	1	1	0.445378	1	1	1	1	1
109163016	G	A	A	A	A	A	A	1	1	1	1	1	1	12	29	28	29	14	27	0	1	1	1	1	1	0.941176	1	1	1	1	1
40176925	G	A	A	A	A	A	A	1	1	1	1	1	1	50	49	14	34	46	67	1	1	1	0.941176	1	1	1	1	0	1	1	1
40176928	T	C	C	C	C	C	C	1	1	1	1	1	1	48	52	19	35	46	68	1	1	1	0.941176	1	1	1	1	0	1	1	1
59691158	T	C	C	C	C	C	C	1	1	1	1	1	1	61	53	25	69	43	27	1	1	1	1	1	0.375	0.8	1	0.769231	1	1	1
109163008	C	T	T	T	T	T	T	1	1	1	1	1	1	13	30	28	32	12	26	0	1	1	1	1	1	0.944444	1	1	1	1	1
41635701	T	C	C	C	C	C	C	1	1	1	1	1	1	37	13	13	38	27	14	0	1	1	1	1	1	1	1	1	1	0.944444	1
27058435	A	G	G	G	G	G	G	1	1	1	1	1	1	65	18	22	35	32	25	0	1	1	0.947368	1	1	1	1	1	1	1	1
27058445	G	T	T	T	T	T	T	1	1	1	1	1	1	59	19	18	37	29	18	0	1	1	0.947368	1	1	1	1	1	1	1	1
22671350	A	G	G	G	G	G	G	1	1	1	1	1	1	46	36	30	48	30	35	0	1	1	1	1	1	1	1	1	0.947368	1	1
265203	A	C	C	C	C	C	C	1	1	1	1	1	1	100	60	39	61	28	48	1	1	1	0.951613	1	1	1	1	1	1	1	0
32263055	T	C	C	C	C	C	C	1	1	1	1	1	1	116	64	121	217	54	159	1	1	1	1	1	0.333333	0.619048	1	1	1	1	1
4754084	A	T	T	T	T	T	T	1	1	1	1	1	1	39	20	11	26	16	26	1	1	1	1	1	1	1	1	0	1	1	0.956522
52763546	T	C	C	C	C	C	C	1	1	1	1	1	1	35	35	13	35	10	12	0	1	0.958333	1	1	1	1	1	1	1	1	1
19478865	C	T	T	T	T	T	T	1	1	1	1	1	1	32	25	31	41	17	48	1	1	1	0.959184	1	1	1	1	0	1	1	1
56182297	A	G	G	G	G	G	G	1	1	1	1	1	1	81	85	39	64	51	63	0	0.965517	1	1	1	1	1	1	1	1	1	1
80053384	A	G	G	G	G	G	G	1	1	1	1	1	1	37	36	40	33	27	31	0	1	1	1	1	1	1	1	1	1	1	0.966667
50368725	G	A	A	A	A	A	A	1	1	1	1	1	1	53	44	28	79	47	60	1	1	1	1	1	1	1	1	0	1	0.967742	1
58095517	A	G	G	G	G	G	G	1	1	1	1	1	1	156	52	65	82	25	52	1	1	1	0.973333	1	1	0.661017	1	1	1	0.627907	0.705882
16838051	C	T	T	T	T	T	T	1	1	1	1	1	1	55	31	21	45	28	25	1	1	1	1	1	1	1	1	0.8	0.583333	1	0.586207
45190771	A	G	G	G	G	G	G	1	1	1	1	1	1	64	33	18	40	36	10	1	1	1	1	1	1	0.5625	1	1	0.409091	1	1
264195	C	T	T	T	T	T	T	1	1	1	1	1	1	72	52	115	119	41	48	1	1	1	0.972222	1	1	1	1	1	1	1	0
44411338	A	G	G	G	G	G	G	1	1	1	1	1	1	35	42	10	32	33	14	0	1	0.972222	1	1	1	1	1	1	1	1	1
7525014	G	T	T	T	T	T	T	1	1	1	1	1	1	32	20	31	19	18	33	0	1	1	1	1	1	1	1	1	0.972973	1	1
264211	C	T	T	T	T	T	T	1	1	1	1	1	1	79	55	109	123	43	60	1	1	1	0.974026	1	1	1	1	1	1	1	0
49302890	T	C	C	C	C	C	C	1	1	1	1	1	1	40	26	14	25	26	18	1	1	0.974359	1	1	1	1	1	0	1	1	1
111704342	G	C	C	C	C	C	C	1	1	1	1	1	1	23	43	31	40	21	91	1	1	1	0.974359	1	1	1	1	0	1	1	1
65496668	C	T	T	T	T	T	T	1	1	1	1	1	1	121	60	88	179	60	106	0	0.975	1	1	1	1	1	1	1	1	1	1
83481567	G	A	A	A	A	A	A	1	1	1	1	1	1	28	15	12	17	20	12	0	1	1	1	1	1	1	1	1	1	0.978723	1
52764578	C	G	G	G	G	G	G	1	1	1	1	1	1	37	65	20	64	16	24	1	1	0.978723	1	1	1	1	1	0	1	1	1
44411260	T	C	C	C	C	C	C	1	1	1	1	1	1	113	93	24	79	105	31	0	1	1	1	1	1	1	0.98	1	1	1	1
70910363	A	G	G	G	G	G	G	1	1	1	1	1	1	60	15	26	55	52	37	0	1	1	0.980392	1	1	1	1	1	1	1	1
57851973	G	A	A	A	A	A	A	1	1	1	1	1	1	49	45	40	37	16	21	1	1	1	1	1	1	1	1	1	0.439024	1	0.542373
26099167	A	G	G	G	G	G	G	1	1	1	1	1	1	93	63	27	31	23	58	1	1	1	1	1	1	1	1	0	0.981481	1	1
49303000	T	C	C	C	C	C	C	1	1	1	1	1	1	79	38	26	57	47	40	0	1	0.981818	1	1	1	1	1	1	1	1	1
91739029	A	G	G	G	G	G	G	1	1	1	1	1	1	536	399	233	399	526	638	0	0.995745	1	1	1	0.995402	1	1	1	1	1	0.997382
76352240	T	G	G	G	G	G	G	1	1	1	1	1	1	65	33	20	43	30	47	1	1	1	1	1	1	1	0.363636	1	0.666667	1	0.958333
14186133	C	T	T	T	T	T	T	1	1	1	1	1	1	24	13	34	20	12	37	1	1	1	1	1	1	0.595745	1	1	1	0.393939	1
59964418	A	G	G	G	G	G	G	1	1	1	1	1	1	210	177	120	193	145	44	1	0	1	0.993377	1	1	1	1	1	1	1	1
57239147	G	A	A	A	A	A	A	1	1	1	1	1	1	46	44	21	42	11	20	0.678571	0.6875	1	1	0.631579	1	1	1	1	1	1	1
47813692	G	C	C	C	C	C	C	1	1	1	1	1	1	18	10	24	31	16	10	1	1	1	1	1	0	1	1	1	1	1	1
47814437	A	C	C	C	C	C	C	1	1	1	1	1	1	21	33	13	13	17	37	1	1	1	1	1	0	1	1	1	1	1	1
19437034	N	G	G	G	G	G	G	1	1	1	1	1	1	40	32	41	50	13	33	1	1	1	1	1	0	1	1	1	1	1	1
19141094	G	C	C	C	C	C	C	1	1	1	1	1	1	17	10	15	12	13	13	1	1	1	1	1	0	1	1	1	1	1	1
41636530	T	G	G	G	G	G	G	1	1	1	1	1	1	31	31	11	38	10	28	1	1	1	1	1	0	1	1	1	1	1	1
41636553	T	C	C	C	C	C	C	1	1	1	1	1	1	40	41	11	39	16	27	1	1	1	1	1	0	1	1	1	1	1	1
265103	G	A	A	A	A	A	A	1	1	1	1	1	1	65	50	26	42	33	56	1	1	1	1	1	1	1	1	1	1	1	0
265231	C	G	G	G	G	G	G	1	1	1	1	1	1	112	54	38	57	31	40	1	1	1	1	1	1	1	1	1	1	1	0
77351968	A	G	G	G	G	G	G	1	1	1	1	1	1	12	15	10	11	14	26	1	1	1	1	1	1	1	1	1	1	1	0
26332173	C	G	G	G	G	G	G	1	1	1	1	1	1	41	23	22	45	11	50	1	1	1	1	1	1	1	1	0	1	1	1
26332761	G	A	A	A	A	A	A	1	1	1	1	1	1	41	26	23	36	23	38	0	1	1	1	1	1	1	1	1	1	1	1
26333126	T	C	C	C	C	C	C	1	1	1	1	1	1	25	17	12	19	24	40	0	1	1	1	1	1	1	1	1	1	1	1
26333207	A	G	G	G	G	G	G	1	1	1	1	1	1	26	12	11	21	13	36	0	1	1	1	1	1	1	1	1	1	1	1
26333337	A	G	G	G	G	G	G	1	1	1	1	1	1	37	15	16	46	41	32	0	1	1	1	1	1	1	1	1	1	1	1
26333385	C	T	T	T	T	T	T	1	1	1	1	1	1	46	14	13	33	42	35	0	1	1	1	1	1	1	1	1	1	1	1
92890592	C	T	T	T	T	T	T	1	1	1	1	1	1	49	46	40	37	40	93	1	1	1	1	1	1	1	1	0	1	1	1
104176451	T	C	C	C	C	C	C	1	1	1	1	1	1	53	37	19	35	30	43	0	1	1	1	1	1	1	1	1	1	1	1
11283556	T	C	C	C	C	C	C	1	1	1	1	1	1	34	23	20	24	25	24	1	1	1	1	1	1	1	1	0	1	1	1
49070503	A	G	G	G	G	G	G	1	1	1	1	1	1	17	18	13	26	14	30	1	1	1	1	1	1	1	1	0	1	1	1
49070508	G	A	A	A	A	A	A	1	1	1	1	1	1	17	17	13	24	15	31	1	1	1	1	1	1	1	1	0	1	1	1
106131107	T	C	C	C	C	C	C	1	1	1	1	1	1	22	16	13	48	15	17	0	1	1	1	1	1	1	1	1	1	1	1
50509980	A	G	G	G	G	G	G	1	1	1	1	1	1	20	34	13	17	20	33	1	1	1	1	1	1	1	1	0	1	1	1
50510022	A	G	G	G	G	G	G	1	1	1	1	1	1	16	25	11	15	14	26	1	1	1	1	1	1	1	1	0	1	1	1
56443840	C	G	G	G	G	G	G	1	1	1	1	1	1	89	33	20	82	45	29	1	1	1	1	1	1	1	1	0	1	1	1
56443856	T	C	C	C	C	C	C	1	1	1	1	1	1	64	20	15	71	33	27	1	1	1	1	1	1	1	1	0	1	1	1
56443859	C	T	T	T	T	T	T	1	1	1	1	1	1	54	15	11	57	33	27	1	1	1	1	1	1	1	1	0	1	1	1
42269244	A	G	G	G	G	G	G	1	1	1	1	1	1	33	28	13	46	20	34	1	1	1	1	1	1	1	1	0	1	1	1
47905411	C	G	G	G	G	G	G	1	1	1	1	1	1	59	75	22	67	65	48	0	1	1	1	1	1	1	1	1	1	1	1
50067119	G	A	A	A	A	A	A	1	1	1	1	1	1	46	26	14	38	23	21	1	1	1	1	1	1	1	1	0	1	1	1
50067134	G	A	A	A	A	A	A	1	1	1	1	1	1	33	23	11	29	26	24	1	1	1	1	1	1	1	1	0	1	1	1
66538894	A	G	G	G	G	G	G	1	1	1	1	1	1	12	26	10	19	10	20	1	1	1	1	1	1	1	1	1	1	0	1
43782107	T	A	A	A	A	A	A	1	1	1	1	1	1	32	16	26	14	17	13	1	1	1	1	1	1	1	0	1	1	1	1
43782113	C	T	T	T	T	T	T	1	1	1	1	1	1	31	15	25	16	17	13	1	1	1	1	1	1	1	0	1	1	1	1
71828557	C	T	T	T	T	T	T	1	1	1	1	1	1	25	13	14	46	13	20	0	1	1	1	1	1	1	1	1	1	1	1
9661580	G	A	A	A	A	A	A	1	1	1	1	1	1	29	40	35	43	27	44	0	1	1	1	1	1	1	1	1	1	1	1
9661598	C	G	G	G	G	G	G	1	1	1	1	1	1	28	43	33	45	29	34	0	1	1	1	1	1	1	1	1	1	1	1
9661666	T	C	C	C	C	C	C	1	1	1	1	1	1	24	46	27	31	31	34	0	1	1	1	1	1	1	1	1	1	1	1
9661974	T	C	C	C	C	C	C	1	1	1	1	1	1	19	35	31	38	22	42	0	1	1	1	1	1	1	1	1	1	1	1
20235097	T	C	C	C	C	C	C	1	1	1	1	1	1	72	57	17	32	23	16	1	1	1	1	1	1	1	1	0	1	1	1
20235343	T	C	C	C	C	C	C	1	1	1	1	1	1	28	25	13	15	12	23	1	1	1	1	1	1	1	1	0	1	1	1
57122426	G	A	A	A	A	A	A	1	1	1	1	1	1	65	37	23	60	44	47	0	1	1	1	1	1	1	1	1	1	1	1
57122432	T	C	C	C	C	C	C	1	1	1	1	1	1	64	29	23	55	41	46	0	1	1	1	1	1	1	1	1	1	1	1
57122441	C	T	T	T	T	T	T	1	1	1	1	1	1	59	22	18	51	40	38	0	1	1	1	1	1	1	1	1	1	1	1
57122453	A	G	G	G	G	G	G	1	1	1	1	1	1	34	21	14	37	34	26	0	1	1	1	1	1	1	1	1	1	1	1
9512828	G	A	A	A	A	A	A	1	1	1	1	1	1	42	16	12	28	37	57	0	1	1	1	1	1	1	1	1	1	1	1
11853013	G	A	A	A	A	A	A	1	1	1	1	1	1	16	21	43	10	10	18	1	1	1	1	1	1	1	1	0	1	1	1
42653247	A	G	G	G	G	G	G	1	1	1	1	1	1	15	40	20	34	23	20	0	1	1	1	1	1	1	1	1	1	1	1
42653270	A	G	G	G	G	G	G	1	1	1	1	1	1	10	37	19	28	21	15	0	1	1	1	1	1	1	1	1	1	1	1
55494288	G	A	A	A	A	A	A	1	1	1	1	1	1	37	26	17	28	16	16	1	1	1	1	1	1	1	1	0	1	1	1
28834831	T	C	C	C	C	C	C	1	1	1	1	1	1	84	36	28	102	23	43	0	1	1	1	1	1	1	1	1	1	1	1
28834863	T	C	C	C	C	C	C	1	1	1	1	1	1	87	35	31	96	21	34	0	1	1	1	1	1	1	1	1	1	1	1
28834889	A	G	G	G	G	G	G	1	1	1	1	1	1	51	18	19	51	11	13	0	1	1	1	1	1	1	1	1	1	1	1
28835054	G	A	A	A	A	A	A	1	1	1	1	1	1	53	32	12	24	19	24	0	1	1	1	1	1	1	1	1	1	1	1
28835066	T	C	C	C	C	C	C	1	1	1	1	1	1	53	33	13	29	23	27	0	1	1	1	1	1	1	1	1	1	1	1
28835120	G	A	A	A	A	A	A	1	1	1	1	1	1	82	50	27	46	27	34	0	1	1	1	1	1	1	1	1	1	1	1
73828112	A	C	C	C	C	C	C	1	1	1	1	1	1	47	31	17	45	19	26	0	1	1	1	1	1	1	1	1	1	1	1
1570984	C	T	T	T	T	T	T	1	1	1	1	1	1	18	22	16	14	11	38	0	1	1	1	1	1	1	1	1	1	1	1
1571009	A	G	G	G	G	G	G	1	1	1	1	1	1	18	17	12	14	10	33	0	1	1	1	1	1	1	1	1	1	1	1
1571010	C	T	T	T	T	T	T	1	1	1	1	1	1	18	17	14	14	10	33	0	1	1	1	1	1	1	1	1	1	1	1
50611383	A	G	G	G	G	G	G	1	1	1	1	1	1	26	24	12	25	30	14	0	1	1	1	1	1	1	1	1	1	1	1
55878286	T	C	C	C	C	C	C	1	1	1	1	1	1	41	32	15	20	15	24	0	1	1	1	1	1	1	1	1	1	1	1
5643532	T	C	C	C	C	C	C	1	1	1	1	1	1	34	14	10	13	17	12	0	1	1	1	1	1	1	1	1	1	1	1
10634973	C	A	A	A	A	A	A	1	1	1	1	1	1	46	29	21	53	69	101	1	1	1	1	1	1	1	1	0	1	1	1
37141406	T	C	C	C	C	C	C	1	1	1	1	1	1	28	24	10	10	12	10	0	1	1	1	1	1	1	1	1	1	1	1
43186403	A	G	G	G	G	G	G	1	1	1	1	1	1	59	45	26	34	27	57	0	1	1	1	1	1	1	1	1	1	1	1
9999674	N	T	T	T	T	T	T	1	1	1	1	1	1	80	54	59	99	30	88	1	0	1	1	1	1	1	1	1	1	1	1
40580864	A	G	G	G	G	G	G	1	1	1	1	1	1	100	38	31	53	49	103	1	1	1	1	1	1	1	1	0	1	1	1
55264938	A	G	G	G	G	G	G	1	1	1	1	1	1	94	77	42	85	41	98	1	1	1	1	1	1	1	1	0	1	1	1
56451360	T	A	A	A	A	A	A	1	1	1	1	1	1	41	23	13	26	15	32	0	1	1	1	1	1	1	1	1	1	1	1
70697971	T	C	C	C	C	C	C	1	1	1	1	1	1	64	72	49	73	16	83	0	1	1	1	1	1	1	1	1	1	1	1
70697974	T	C	C	C	C	C	C	1	1	1	1	1	1	60	71	47	72	14	75	0	1	1	1	1	1	1	1	1	1	1	1
70697991	T	C	C	C	C	C	C	1	1	1	1	1	1	46	64	45	61	12	57	0	1	1	1	1	1	1	1	1	1	1	1
80800976	A	G	G	G	G	G	G	1	1	1	1	1	1	32	47	45	52	33	57	1	1	1	1	1	1	1	0	1	1	1	1
6356195	C	G	G	G	G	G	G	1	1	1	1	1	1	54	25	17	37	14	30	1	1	1	1	1	1	1	1	0	1	1	1
38211500	G	A	A	A	A	A	A	1	1	1	1	1	1	25	44	23	43	26	23	1	0	1	1	1	1	1	1	1	1	1	1
49533045	C	T	T	T	T	T	T	1	1	1	1	1	1	15	22	16	18	12	10	0	1	1	1	1	1	1	1	1	1	1	1
55611579	T	C	C	C	C	C	C	1	1	1	1	1	1	10	18	12	13	13	10	0	1	1	1	1	1	1	1	1	1	1	1
63769593	A	G	G	G	G	G	G	1	1	1	1	1	1	23	14	13	23	10	18	1	1	1	1	1	1	1	1	0	1	1	1
2696003	A	G	G	G	G	G	G	1	1	1	1	1	1	15	14	10	27	13	28	1	1	1	1	1	1	1	1	0	1	1	1
2696019	T	A	A	A	A	A	A	1	1	1	1	1	1	15	15	10	27	11	26	1	1	1	1	1	1	1	1	0	1	1	1
52763569	T	C	C	C	C	C	C	1	1	1	1	1	1	81	66	45	101	27	28	0	1	1	1	1	1	1	1	1	1	1	1
52763680	A	G	G	G	G	G	G	1	1	1	1	1	1	136	121	92	203	41	48	0	1	1	1	1	1	1	1	1	1	1	1
52764034	A	G	G	G	G	G	G	1	1	1	1	1	1	69	100	152	194	20	30	0	1	1	1	1	1	1	1	1	1	1	1
52764229	C	T	T	T	T	T	T	1	1	1	1	1	1	86	115	59	115	39	32	0	1	1	1	1	1	1	1	1	1	1	1
52764415	C	T	T	T	T	T	T	1	1	1	1	1	1	81	127	78	98	29	36	0	1	1	1	1	1	1	1	1	1	1	1
52764599	A	G	G	G	G	G	G	1	1	1	1	1	1	45	80	26	69	21	30	1	1	1	1	1	1	1	1	0	1	1	1
52764706	G	A	A	A	A	A	A	1	1	1	1	1	1	63	62	39	64	24	21	0	1	1	1	1	1	1	1	1	1	1	1
52764739	C	T	T	T	T	T	T	1	1	1	1	1	1	46	37	30	48	18	15	0	1	1	1	1	1	1	1	1	1	1	1
52764740	A	G	G	G	G	G	G	1	1	1	1	1	1	49	37	29	52	18	15	0	1	1	1	1	1	1	1	1	1	1	1
52764780	T	C	C	C	C	C	C	1	1	1	1	1	1	30	17	21	30	10	12	0	1	1	1	1	1	1	1	1	1	1	1
59497514	G	T	T	T	T	T	T	1	1	1	1	1	1	26	24	18	22	26	47	0	1	1	1	1	1	1	1	1	1	1	1
14972533	G	A	A	A	A	A	A	1	1	1	1	1	1	34	12	10	19	13	28	0	1	1	1	1	1	1	1	1	1	1	1
49302576	T	C	C	C	C	C	C	1	1	1	1	1	1	55	40	19	86	23	31	0	1	1	1	1	1	1	1	1	1	1	1
44291940	C	T	T	T	T	T	T	1	1	1	1	1	1	154	94	19	44	51	121	1	1	1	1	1	1	1	1	0	1	1	1
2767346	C	A	A	A	A	A	A	1	1	1	1	1	1	25	37	10	16	28	34	1	1	1	1	1	1	1	1	0	1	1	1
37283239	T	A	A	A	A	A	A	1	1	1	1	1	1	26	29	17	35	18	38	0	1	1	1	1	1	1	1	1	1	1	1
7340045	G	C	C	C	C	C	C	1	1	1	1	1	1	28	18	17	29	28	13	1	1	1	1	1	1	1	1	0	1	1	1
7340091	C	G	G	G	G	G	G	1	1	1	1	1	1	26	16	16	28	30	10	1	1	1	1	1	1	1	1	0	1	1	1
7340591	A	G	G	G	G	G	G	1	1	1	1	1	1	13	32	22	33	19	33	1	1	1	1	1	1	1	1	0	1	1	1
7340627	T	C	C	C	C	C	C	1	1	1	1	1	1	19	43	27	42	26	34	1	1	1	1	1	1	1	1	0	1	1	1
7340679	G	A	A	A	A	A	A	1	1	1	1	1	1	19	30	22	35	24	27	1	1	1	1	1	1	1	1	0	1	1	1
3334011	N	T	T	T	T	T	T	1	1	1	1	1	1	21	12	10	61	34	53	1	1	1	1	1	1	0	1	1	1	1	1
23734550	G	A	A	A	A	A	A	1	1	1	1	1	1	87	69	86	164	53	140	0	1	1	1	1	1	1	1	1	1	1	1
19478913	T	C	C	C	C	C	C	1	1	1	1	1	1	20	14	23	27	11	32	1	1	1	1	1	1	1	1	0	1	1	1
20297417	A	G	G	G	G	G	G	1	1	1	1	1	1	30	27	11	33	32	26	0	1	1	1	1	1	1	1	1	1	1	1
28137827	C	T	T	T	T	T	T	1	1	1	1	1	1	21	32	14	35	17	13	1	1	1	1	1	1	1	1	1	0	1	1
32861036	C	T	T	T	T	T	T	1	1	1	1	1	1	29	46	13	25	25	22	1	1	1	1	1	1	1	1	0	1	1	1
32861346	A	G	G	G	G	G	G	1	1	1	1	1	1	44	55	18	43	20	18	1	1	1	1	1	1	1	1	0	1	1	1
32861348	G	A	A	A	A	A	A	1	1	1	1	1	1	41	53	17	43	21	18	1	1	1	1	1	1	1	1	0	1	1	1
50654914	C	G	G	G	G	G	G	1	1	1	1	1	1	24	14	11	27	11	18	0	1	1	1	1	1	1	1	1	1	1	1
50655109	C	G	G	G	G	G	G	1	1	1	1	1	1	36	13	18	35	12	43	0	1	1	1	1	1	1	1	1	1	1	1
6101708	C	T	T	T	T	T	T	1	1	1	1	1	1	20	34	18	39	25	30	0	1	1	1	1	1	1	1	1	1	1	1
50562373	A	G	G	G	G	G	G	1	1	1	1	1	1	30	21	16	47	13	34	1	1	1	1	1	1	1	1	0	1	1	1
50562392	T	C	C	C	C	C	C	1	1	1	1	1	1	26	14	16	37	10	21	1	1	1	1	1	1	1	1	0	1	1	1
59143632	A	G	G	G	G	G	G	1	1	1	1	1	1	66	36	11	30	24	33	1	1	1	1	1	1	1	1	0	1	1	1
73833965	C	A	A	A	A	A	A	1	1	1	1	1	1	46	33	29	54	39	30	0	1	1	1	1	1	1	1	1	1	1	1
84414469	T	C	C	C	C	C	C	1	1	1	1	1	1	37	38	10	28	32	45	1	1	1	1	1	1	1	1	0	1	1	1
116645764	A	G	G	G	G	G	G	1	1	1	1	1	1	30	24	16	32	26	19	0	1	1	1	1	1	1	1	1	1	1	1
117320644	T	C	C	C	C	C	C	1	1	1	1	1	1	10	15	13	17	15	21	0	1	1	1	1	1	1	1	1	1	1	1
117320685	C	T	T	T	T	T	T	1	1	1	1	1	1	10	15	17	22	17	28	0	1	1	1	1	1	1	1	1	1	1	1
119487689	C	T	T	T	T	T	T	1	1	1	1	1	1	77	28	12	44	52	25	1	1	1	1	1	1	1	1	0	1	1	1
130708629	N	T	T	T	T	T	T	1	1	1	1	1	1	36	41	77	65	13	86	1	0	1	1	1	1	1	1	1	1	1	1
5454693	C	T	T	T	T	T	T	1	1	1	1	1	1	27	33	16	22	21	31	1	1	1	1	1	1	1	1	0	1	1	1
9371967	T	C	C	C	C	C	C	1	1	1	1	1	1	17	22	20	50	35	46	0	1	1	1	1	1	1	1	1	1	1	1
9372199	A	G	G	G	G	G	G	1	1	1	1	1	1	31	15	11	37	23	36	1	1	1	1	1	1	1	1	0	1	1	1
12559514	N	T	T	T	T	T	T	1	1	1	1	1	1	59	37	50	64	36	16	0	1	1	1	1	1	1	1	1	1	1	1
34543125	T	C	C	C	C	C	C	1	1	1	1	1	1	28	22	28	31	20	31	0	1	1	1	1	1	1	1	1	1	1	1
53472497	N	C	C	C	C	C	C	1	1	1	1	1	1	334	246	481	181	386	255	0	1	1	1	1	1	1	1	1	1	1	1
99695312	G	T	T	T	T	T	T	1	1	1	1	1	1	39	24	33	53	34	54	0	1	1	1	1	1	1	1	1	1	1	1
99695972	C	T	T	T	T	T	T	1	1	1	1	1	1	50	28	13	39	21	18	0	1	1	1	1	1	1	1	1	1	1	1
99696141	C	T	T	T	T	T	T	1	1	1	1	1	1	11	26	10	23	11	22	1	1	1	1	1	1	1	1	0	1	1	1
99696248	A	G	G	G	G	G	G	1	1	1	1	1	1	33	19	18	28	16	29	0	1	1	1	1	1	1	1	1	1	1	1
99696263	A	G	G	G	G	G	G	1	1	1	1	1	1	40	27	17	35	16	37	0	1	1	1	1	1	1	1	1	1	1	1
16724133	A	C	C	C	C	C	C	1	1	1	1	1	1	14	27	21	18	11	16	0	1	1	1	1	1	1	1	1	1	1	1
39548449	T	C	C	C	C	C	C	1	1	1	1	1	1	21	21	28	16	17	60	1	1	1	1	1	1	1	1	0	1	1	1
39548451	A	T	T	T	T	T	T	1	1	1	1	1	1	17	19	26	16	15	51	1	1	1	1	1	1	1	1	0	1	1	1
62081437	G	T	T	T	T	T	T	1	1	1	1	1	1	15	19	15	33	35	39	1	1	1	1	1	1	1	1	1	1	0	1
12714011	T	C	C	C	C	C	C	1	1	1	1	1	1	24	12	15	26	15	59	1	1	1	1	1	1	1	0	1	1	1	1
17208381	G	T	T	T	T	T	T	1	1	1	1	1	1	20	11	28	45	24	43	1	1	1	1	1	1	1	1	0	1	1	1
39642835	A	G	G	G	G	G	G	1	1	1	1	1	1	24	10	11	14	18	19	1	1	1	1	1	1	1	0	1	1	1	1
60732327	A	C	C	C	C	C	C	1	1	1	1	1	1	19	12	24	13	16	16	1	1	1	1	1	1	1	1	0	1	1	1
60732348	G	A	A	A	A	A	A	1	1	1	1	1	1	10	10	15	10	13	16	1	1	1	1	1	1	1	1	0	1	1	1
65424654	C	T	T	T	T	T	T	1	1	1	1	1	1	21	17	16	18	14	38	0	1	1	1	1	1	1	1	1	1	1	1
65424667	T	G	G	G	G	G	G	1	1	1	1	1	1	18	21	13	14	15	30	0	1	1	1	1	1	1	1	1	1	1	1
65424691	T	G	G	G	G	G	G	1	1	1	1	1	1	14	20	10	13	12	26	0	1	1	1	1	1	1	1	1	1	1	1
70910377	T	C	C	C	C	C	C	1	1	1	1	1	1	65	19	36	66	68	36	0	1	1	1	1	1	1	1	1	1	1	1
77514519	C	G	G	G	G	G	G	1	1	1	1	1	1	12	11	16	23	12	13	1	1	1	1	1	1	1	1	1	1	0	1
101267009	N	T	T	T	T	T	T	1	1	1	1	1	1	151	90	77	110	23	98	0	1	1	1	1	1	1	1	1	1	1	1
101267010	N	G	G	G	G	G	G	1	1	1	1	1	1	150	88	79	108	22	99	0	1	1	1	1	1	1	1	1	1	1	1
103703809	A	G	G	G	G	G	G	1	1	1	1	1	1	17	21	20	30	15	13	1	1	1	1	1	1	1	1	0	1	1	1
103703811	T	C	C	C	C	C	C	1	1	1	1	1	1	18	21	21	27	15	13	1	1	1	1	1	1	1	1	0	1	1	1
103703813	C	T	T	T	T	T	T	1	1	1	1	1	1	17	21	19	29	15	11	1	1	1	1	1	1	1	1	0	1	1	1
103703817	A	G	G	G	G	G	G	1	1	1	1	1	1	17	24	25	29	18	15	1	1	1	1	1	1	1	1	0	1	1	1
103703989	G	A	A	A	A	A	A	1	1	1	1	1	1	21	30	18	24	12	16	0	1	1	1	1	1	1	1	1	1	1	1
103774144	T	C	C	C	C	C	C	1	1	1	1	1	1	37	48	40	66	37	42	1	1	1	1	1	1	0.666667	0.333333	1	1	1	1
63303525	T	C	C	C	C	C	C	1	1	1	1	1	1	14	14	11	10	10	14	1	1	1	1	1	1	1	1	1	0	1	1
63303538	A	G	G	G	G	G	G	1	1	1	1	1	1	18	18	12	10	10	18	1	1	1	1	1	1	1	1	1	0	1	1
71053486	G	A	A	A	A	A	A	1	1	1	1	1	1	18	21	21	40	14	42	0	1	1	1	1	1	1	1	1	1	1	1
90636816	G	A	A	A	A	A	A	1	1	1	1	1	1	39	18	17	23	13	28	0	1	1	1	1	1	1	1	1	1	1	1
108806084	T	C	C	C	C	C	C	1	1	1	1	1	1	21	37	10	35	15	10	0	1	1	1	1	1	1	1	1	1	1	1
109163445	G	T	T	T	T	T	T	1	1	1	1	1	1	31	11	10	21	11	33	0	1	1	1	1	1	1	1	1	1	1	1
2568150	A	G	G	G	G	G	G	1	1	1	1	1	1	59	21	25	60	30	19	0	1	1	1	1	1	1	1	1	1	1	1
14948032	A	G	G	G	G	G	G	1	1	1	1	1	1	23	33	24	35	31	50	0	1	1	1	1	1	1	1	1	1	1	1
14948263	T	C	C	C	C	C	C	1	1	1	1	1	1	21	11	11	33	29	23	0	1	1	1	1	1	1	1	1	1	1	1
14948302	T	C	C	C	C	C	C	1	1	1	1	1	1	53	30	33	60	46	45	0	1	1	1	1	1	1	1	1	1	1	1
14948343	G	A	A	A	A	A	A	1	1	1	1	1	1	59	31	36	66	46	46	0	1	1	1	1	1	1	1	1	1	1	1
14948424	T	C	C	C	C	C	C	1	1	1	1	1	1	96	31	19	39	36	47	0	1	1	1	1	1	1	1	1	1	1	1
14948428	C	G	G	G	G	G	G	1	1	1	1	1	1	98	31	22	42	36	46	0	1	1	1	1	1	1	1	1	1	1	1
14948489	C	T	T	T	T	T	T	1	1	1	1	1	1	116	65	51	75	62	83	0	1	1	1	1	1	1	1	1	1	1	1
14948606	T	C	C	C	C	C	C	1	1	1	1	1	1	71	31	32	61	51	67	0	1	1	1	1	1	1	1	1	1	1	1
14948608	G	A	A	A	A	A	A	1	1	1	1	1	1	75	30	31	62	51	67	0	1	1	1	1	1	1	1	1	1	1	1
14948694	T	C	C	C	C	C	C	1	1	1	1	1	1	74	40	23	65	29	56	1	1	1	1	1	1	1	1	0	1	1	1
14948918	G	A	A	A	A	A	A	1	1	1	1	1	1	66	23	29	76	33	61	0	1	1	1	1	1	1	1	1	1	1	1
14949049	A	G	G	G	G	G	G	1	1	1	1	1	1	53	31	27	57	48	39	0	1	1	1	1	1	1	1	1	1	1	1
20567985	A	G	G	G	G	G	G	1	1	1	1	1	1	29	28	10	27	22	24	1	1	1	1	1	1	1	0	1	1	1	1
23580540	A	G	G	G	G	G	G	1	1	1	1	1	1	28	34	13	34	29	40	1	1	1	1	1	1	1	1	0	1	1	1
35662940	T	C	C	C	C	C	C	1	1	1	1	1	1	12	15	17	16	21	13	1	1	1	1	1	1	0	1	1	1	1	1
44411242	G	C	C	C	C	C	C	1	1	1	1	1	1	156	107	38	83	131	39	0	1	1	1	1	1	1	1	1	1	1	1
44411264	T	C	C	C	C	C	C	1	1	1	1	1	1	118	87	28	79	108	30	0	1	1	1	1	1	1	1	1	1	1	1
44411319	A	G	G	G	G	G	G	1	1	1	1	1	1	52	64	14	40	56	19	0	1	1	1	1	1	1	1	1	1	1	1
44411331	G	C	C	C	C	C	C	1	1	1	1	1	1	39	47	12	42	44	18	0	1	1	1	1	1	1	1	1	1	1	1
67661985	G	C	C	C	C	C	C	1	1	1	1	1	1	24	19	10	17	22	35	1	1	1	1	1	1	0	1	1	1	1	1
67662022	G	A	A	A	A	A	A	1	1	1	1	1	1	20	13	10	15	19	29	1	1	1	1	1	1	0	1	1	1	1	1
67662036	G	A	A	A	A	A	A	1	1	1	1	1	1	25	13	11	16	18	32	1	1	1	1	1	1	0	1	1	1	1	1
68113677	T	C	C	C	C	C	C	1	1	1	1	1	1	60	54	14	63	26	26	1	1	1	1	1	1	1	1	0	1	1	1
71147968	A	G	G	G	G	G	G	1	1	1	1	1	1	36	23	26	37	14	12	0	1	1	1	1	1	1	1	1	1	1	1
71147991	A	G	G	G	G	G	G	1	1	1	1	1	1	37	17	21	29	11	10	0	1	1	1	1	1	1	1	1	1	1	1
80053624	A	G	G	G	G	G	G	1	1	1	1	1	1	57	33	32	68	28	54	0	1	1	1	1	1	1	1	1	1	1	1
87280421	G	C	C	C	C	C	C	1	1	1	1	1	1	60	44	39	126	48	106	1	0	1	1	1	1	1	1	1	1	1	1
2504595	A	G	G	G	G	G	G	1	1	1	1	1	1	38	10	15	35	11	29	0	1	1	1	1	1	1	1	1	1	1	1
34475300	A	C	C	C	C	C	C	1	1	1	1	1	1	27	23	27	36	28	36	0	1	1	1	1	1	1	1	1	1	1	1
50575644	T	A	A	A	A	A	A	1	1	1	1	1	1	19	26	21	23	16	17	1	1	1	1	1	1	1	1	0	1	1	1
50575648	A	G	G	G	G	G	G	1	1	1	1	1	1	20	27	21	25	16	16	1	1	1	1	1	1	1	1	0	1	1	1
50575672	T	C	C	C	C	C	C	1	1	1	1	1	1	24	34	21	30	17	26	1	1	1	1	1	1	1	1	0	1	1	1
50575679	T	C	C	C	C	C	C	1	1	1	1	1	1	31	33	20	26	21	25	1	1	1	1	1	1	1	1	0	1	1	1
50575703	T	C	C	C	C	C	C	1	1	1	1	1	1	24	31	12	23	24	18	1	1	1	1	1	1	1	1	0	1	1	1
50576091	A	G	G	G	G	G	G	1	1	1	1	1	1	32	16	16	35	14	17	0	1	1	1	1	1	1	1	1	1	1	1
57517369	G	A	A	A	A	A	A	1	1	1	1	1	1	75	25	19	58	22	32	1	1	1	1	1	1	1	0	1	1	1	1
76153723	A	G	G	G	G	G	G	1	1	1	1	1	1	30	54	40	20	11	15	0	1	1	1	1	1	1	1	1	1	1	1
76153765	A	G	G	G	G	G	G	1	1	1	1	1	1	27	45	29	18	12	13	0	1	1	1	1	1	1	1	1	1	1	1
101443002	T	C	C	C	C	C	C	1	1	1	1	1	1	50	28	18	30	50	45	1	1	1	1	1	1	1	1	0	1	1	1
4005615	C	T	T	T	T	T	T	1	1	1	1	1	1	17	12	13	10	10	63	0	1	1	1	1	1	1	1	1	1	1	1
16105335	G	A	A	A	A	A	A	1	1	1	1	1	1	65	55	68	150	75	337	1	1	1	1	1	1	1	1	0	1	1	1
41635165	T	C	C	C	C	C	C	1	1	1	1	1	1	53	31	17	52	17	31	0	1	1	1	1	1	1	1	1	1	1	1
41635190	A	G	G	G	G	G	G	1	1	1	1	1	1	55	37	33	52	21	36	0	1	1	1	1	1	1	1	1	1	1	1
41635203	A	G	G	G	G	G	G	1	1	1	1	1	1	47	24	35	56	19	32	0	1	1	1	1	1	1	1	1	1	1	1
41635239	C	T	T	T	T	T	T	1	1	1	1	1	1	28	23	32	43	11	21	0	1	1	1	1	1	1	1	1	1	1	1
41635259	C	T	T	T	T	T	T	1	1	1	1	1	1	23	20	31	35	10	19	0	1	1	1	1	1	1	1	1	1	1	1
41635664	T	C	C	C	C	C	C	1	1	1	1	1	1	35	24	18	52	27	18	0	1	1	1	1	1	1	1	1	1	1	1
46306984	A	G	G	G	G	G	G	1	1	1	1	1	1	19	13	15	15	27	56	0	1	1	1	1	1	1	1	1	1	1	1
110194598	C	A	A	A	A	A	A	1	1	1	1	1	1	80	47	92	95	25	84	0	1	1	1	1	1	1	1	1	1	1	1
110194624	C	A	A	A	A	A	A	1	1	1	1	1	1	134	98	147	149	53	140	0	1	1	1	1	1	1	1	1	1	1	1
110194627	C	G	G	G	G	G	G	1	1	1	1	1	1	133	99	150	151	54	141	0	1	1	1	1	1	1	1	1	1	1	1
110195107	A	G	G	G	G	G	G	1	1	1	1	1	1	38	27	15	44	11	14	0	1	1	1	1	1	1	1	1	1	1	1
111704333	G	A	A	A	A	A	A	1	1	1	1	1	1	21	41	31	41	21	82	1	1	1	1	1	1	1	1	0	1	1	1
2786	T	C	C	C	C	C	C	1	1	1	1	1	1	81	75	19	97	49	27	0	1	1	1	1	1	1	1	1	1	1	1
33382728	C	A	A	A	A	A	A	1	1	1	1	1	1	435	382	265	461	234	190	1	1	1	1	1	1	0.511475	1	1	1	1	0.491039
70858819	T	C	C	C	C	C	C	1	1	1	1	1	1	46	30	13	37	21	38	1	1	1	1	1	1	0.478261	0.526316	1	1	1	1
22698920	G	A	A	A	A	A	A	1	1	1	1	1	1	56	48	51	58	16	44	1	1	0.465116	1	0.55	1	1	1	1	1	1	1
57239226	G	A	A	A	A	A	A	1	1	1	1	1	1	63	54	24	43	15	35	0.666667	0.85	1	1	0.5	1	1	1	1	1	1	1
13055863	T	C	C	C	C	C	C	1	1	1	1	1	1	50	53	33	59	33	17	0.53125	1	1	1	1	0.486486	1	1	1	1	1	1
90276903	A	G	G	G	G	G	G	1	1	1	1	1	1	31	42	50	51	16	34	1	1	1	1	0.642857	1	1	0.375	1	1	1	1
13085671	A	G	G	G	G	G	G	1	1	1	1	1	1	96	44	25	59	88	52	1	1	1	1	0.424242	0.596491	1	1	1	1	1	1
17449112	A	C	C	C	C	C	C	1	1	1	1	1	1	18	10	26	16	10	131	1	1	0.666667	0.967742	1	1	1	1	1	0.888889	0.5	1
44469142	A	G	G	G	G	G	G	1	1	1	1	1	1	134	113	80	91	70	129	1	1	1	1	1	1	1	1	1	0.534483	0.493151	1
1738062	G	T	T	T	T	T	T	1	1	1	1	1	1	122	52	42	40	97	89	1	1	1	0.955556	1	1	0.434483	1	1	0.994595	1	0.652174
66262966	T	C	C	C	C	C	C	1	1	1	1	1	1	13	16	25	19	12	26	1	1	1	1	1	0.8125	1	0.833333	0.454545	1	1	0.95
112675486	G	C	C	C	C	C	C	1	1	1	1	1	1	529	378	236	465	479	390	0.529412	1	0.546448	0.99449	0.985348	0.996516	1	1	1	1	1	1
71052434	G	C	C	C	C	C	C	1	1	1	1	1	1	81	91	110	156	73	129	1	1	0.574468	1	1	0.5	1	1	1	1	1	0.977778
1850795	A	C	C	C	C	C	C	1	1	1	1	1	1	49	35	28	38	11	43	1	1	1	0.974684	1	0.636364	0.444444	1	1	1	1	1
28160218	T	G	G	G	G	G	G	1	1	1	1	1	1	127	116	51	147	45	114	1	0.978723	1	0.990291	1	1	0.986486	0.604167	0.527778	0.971429	1	1
17277264	A	G	G	G	G	G	G	1	1	1	1	1	1	43	58	27	73	42	39	1	1	1	1	1	1	1	0.56	1	0.5	1	1
16309831	A	G	G	G	G	G	G	1	1	1	1	1	1	73	63	19	47	27	25	1	1	0.617021	1	1	1	0.974359	1	0.470588	1	1	1
56823399	T	C	C	C	C	C	C	1	1	1	1	1	1	135	68	18	43	49	28	1	1	0.97561	1	1	1	0.65	0.4375	1	1	1	1
103779100	A	G	G	G	G	G	G	1	1	1	1	1	1	511	528	179	681	413	242	1	1	1	1	1	0.987179	0.522222	0.558974	1	1	1	1
57244767	T	C	C	C	C	C	C	1	1	1	1	1	1	95	57	78	148	79	76	1	1	1	0.985294	1	1	1	1	1	1	0.559322	0.541176
48966328	T	C	C	C	C	C	C	1	1	1	1	1	1	22	50	25	57	11	22	1	1	1	0.516129	0.571429	1	1	1	1	1	1	1
130647422	G	T	T	T	T	T	T	1	1	1	1	1	1	80	78	21	49	39	51	1	1	1	0.589286	1	1	0.5	1	1	1	1	1
65189978	C	A	A	A	A	A	A	1	1	1	1	1	1	13	32	20	25	12	14	1	1	0.48	0.611111	1	1	1	1	1	1	1	1
4425502	A	G	G	G	G	G	G	1	1	1	1	1	1	30	66	51	34	17	39	1	1	1	1	1	1	0.632184	0.461538	1	1	1	1
104061438	T	C	C	C	C	C	C	1	1	1	1	1	1	542	333	121	294	236	221	1	1	1	1	1	1	0.550336	0.562874	1	0.996226	1	1
78304618	G	A	A	A	A	A	A	1	1	1	1	1	1	57	42	42	95	20	52	1	1	1	1	1	1	0.625	1	1	1	1	0.487805
66889524	A	G	G	G	G	G	G	1	1	1	1	1	1	52	36	26	51	23	53	1	1	1	1	1	1	1	0.772727	1	0.666667	0.676471	1
91466190	C	A	A	A	A	A	A	1	1	1	1	1	1	54	20	42	59	32	106	1	1	1	1	1	1	1	0.571429	1	1	0.565217	1
57246705	G	C	C	C	C	C	C	1	1	1	1	1	1	313	377	284	415	283	414	1	1	1	0.995781	1	1	1	1	1	1	0.512987	0.629073
32445294	T	C	C	C	C	C	C	1	1	1	1	1	1	36	47	30	25	13	27	1	1	1	1	1	1	1	1	1	1	1	0.142857
14186011	A	G	G	G	G	G	G	1	1	1	1	1	1	17	15	17	23	19	28	1	1	1	1	1	1	0.5	1	1	1	0.647059	1
28160219	T	A	A	A	A	A	A	1	1	1	1	1	1	124	115	52	144	44	118	1	1	1	1	1	1	1	0.659091	0.527778	0.971429	1	1
7047167	A	G	G	G	G	G	G	1	1	1	1	1	1	18	18	28	34	26	27	1	1	0.75	1	1	1	1	0.411765	1	1	1	1
61787820	A	G	G	G	G	G	G	1	1	1	1	1	1	109	40	69	103	61	124	1	1	1	1	1	1	1	0.47619	0.688889	1	1	1
53685177	A	G	G	G	G	G	G	1	1	1	1	1	1	45	47	19	16	26	22	1	0.727273	1	0.861111	1	1	1	1	1	1	0.818182	0.764706
121026715	A	G	G	G	G	G	G	1	1	1	1	1	1	42	41	38	51	19	30	1	1	1	1	1	1	0.178571	1	1	1	1	1
84503886	G	C	C	C	C	C	C	1	1	1	1	1	1	26	45	17	41	20	13	1	1	0.384615	1	1	1	1	1	1	1	1	0.8
47735843	T	C	C	C	C	C	C	1	1	1	1	1	1	24	13	10	23	34	32	1	1	1	1	1	1	1	1	0.583333	0.607143	1	1
9243941	T	C	C	C	C	C	C	1	1	1	1	1	1	294	97	142	300	136	184	1	1	1	1	1	1	1	0.637931	1	0.554217	1	1
4414522	C	T	T	T	T	T	T	1	1	1	1	1	1	44	59	47	54	24	36	1	1	1	1	1	1	0.65	0.55	1	1	1	1
19400923	T	C	C	C	C	C	C	1	1	1	1	1	1	45	36	47	48	33	45	1	1	1	1	1	1	1	0.95122	0.25	1	1	1
94466717	T	C	C	C	C	C	C	1	1	1	1	1	1	631	588	261	355	438	908	0.996974	0.997706	0.997033	0.217391	1	1	1	0.997076	0.995643	1	1	1
66262952	T	C	C	C	C	C	C	1	1	1	1	1	1	13	15	21	22	12	26	1	1	1	1	1	0.823529	1	0.833333	0.6	1	1	0.954545
22627532	G	C	C	C	C	C	C	1	1	1	1	1	1	67	30	15	26	19	32	1	1	1	1	1	0.214286	1	1	1	1	1	1
4414528	A	G	G	G	G	G	G	1	1	1	1	1	1	29	51	36	52	20	32	1	1	1	1	1	1	0.631579	0.588235	1	1	1	1
18474659	G	A	A	A	A	A	A	1	1	1	1	1	1	123	39	46	104	55	45	1	1	1	0.222222	1	1	1	1	1	1	1	1
23837837	C	T	T	T	T	T	T	1	1	1	1	1	1	41	56	57	34	64	48	1	1	1	1	1	1	1	1	1	0.222222	1	1
45352093	T	C	C	C	C	C	C	1	1	1	1	1	1	38	55	21	50	34	29	1	1	1	1	1	1	0.64	1	1	1	0.588235	1
83454073	C	T	T	T	T	T	T	1	1	1	1	1	1	81	37	43	73	118	31	0.72973	1	1	0.818182	1	1	1	1	1	1	1	0.686567
34623161	A	G	G	G	G	G	G	1	1	1	1	1	1	69	47	30	84	38	31	1	1	1	1	1	1	0.767857	1	0.48	1	1	1
4414488	C	T	T	T	T	T	T	1	1	1	1	1	1	54	64	64	58	23	59	1	1	1	1	1	1	0.714286	0.55	1	1	1	1
4414476	C	A	A	A	A	A	A	1	1	1	1	1	1	55	66	74	70	26	60	1	1	1	1	1	1	0.708333	0.571429	1	1	1	1
103774327	T	C	C	C	C	C	C	1	1	1	1	1	1	32	23	26	47	21	36	1	1	1	1	1	1	0.5	0.8	1	1	1	1
30046729	T	C	C	C	C	C	C	1	1	1	1	1	1	27	42	22	37	54	28	1	1	1	1	0.818182	0.483871	1	1	1	1	1	1
96347502	T	C	C	C	C	C	C	1	1	1	1	1	1	42	36	19	45	40	47	1	1	1	1	1	1	0.307692	1	1	1	1	1
103774519	C	T	T	T	T	T	T	1	1	1	1	1	1	35	47	26	66	11	32	1	1	1	1	0.923077	1	0.833333	0.555556	1	1	1	1
75568287	T	C	C	C	C	C	C	1	1	1	1	1	1	62	46	21	68	53	55	1	1	1	1	1	1	1	0.5625	0.75	1	1	1
59791621	T	C	C	C	C	C	C	1	1	1	1	1	1	50	31	44	63	31	48	1	1	1	1	1	1	0.317073	1	1	1	1	1
13731014	C	G	G	G	G	G	G	1	1	1	1	1	1	21	40	41	27	12	29	1	1	1	0.672131	1	1	0.655172	1	1	1	1	1
20116278	G	A	A	A	A	A	A	1	1	1	1	1	1	70	71	14	64	10	18	0.866667	1	1	0.869565	0.9	1	1	0.833333	1	0.9	1	0.961538
48810360	T	C	C	C	C	C	C	1	1	1	1	1	1	17	20	13	23	17	30	1	1	1	1	1	1	1	1	1	0.333333	1	1
14865370	T	C	C	C	C	C	C	1	1	1	1	1	1	74	58	18	20	25	10	1	1	1	1	1	1	1	1	1	1	0.333333	1
25408210	T	C	C	C	C	C	C	1	1	1	1	1	1	40	38	17	67	35	92	0.333333	1	1	1	1	1	1	1	1	1	1	1
27213989	A	G	G	G	G	G	G	1	1	1	1	1	1	49	17	24	52	22	28	0.333333	1	1	1	1	1	1	1	1	1	1	1
43553930	G	A	A	A	A	A	A	1	1	1	1	1	1	121	131	166	150	66	154	1	1	1	1	1	1	1	1	1	1	1	0.348148
28441471	A	G	G	G	G	G	G	1	1	1	1	1	1	41	25	43	50	17	22	1	1	1	1	1	1	1	1	1	1	1	0.366667
51256695	A	G	G	G	G	G	G	1	1	1	1	1	1	89	61	35	69	61	28	1	1	1	1	1	0.372549	1	1	1	1	1	1
50333953	C	G	G	G	G	G	G	1	1	1	1	1	1	107	94	34	45	43	37	1	1	1	1	1	1	1	1	1	0.388235	1	1
50323458	T	C	C	C	C	C	C	1	1	1	1	1	1	25	16	19	33	17	24	1	1	1	1	1	1	0.894737	1	1	1	1	0.5
18416422	A	G	G	G	G	G	G	1	1	1	1	1	1	19	24	20	19	21	37	1	1	1	1	1	1	1	1	1	0.4	1	1
59690248	T	G	G	G	G	G	G	1	1	1	1	1	1	58	73	19	31	27	34	1	1	1	1	1	1	1	0.413793	1	1	1	1
40137064	T	C	C	C	C	C	C	1	1	1	1	1	1	41	19	18	29	112	49	1	1	1	1	1	1	0.413793	1	1	1	1	1
4414590	G	T	T	T	T	T	T	1	1	1	1	1	1	61	71	64	81	50	61	1	1	1	1	1	1	0.68	0.73913	1	1	1	1
56742282	A	C	C	C	C	C	C	1	1	1	1	1	1	25	48	15	54	56	65	1	1	1	1	1	1	0.766667	0.653846	1	1	1	1
43956000	G	T	T	T	T	T	T	1	1	1	1	1	1	33	12	24	40	37	70	1	1	1	1	1	1	1	1	1	1	1	0.422222
15936562	A	G	G	G	G	G	G	1	1	1	1	1	1	19	27	22	22	19	20	1	1	1	1	1	1	1	1	1	1	1	0.428571
80074986	C	T	T	T	T	T	T	1	1	1	1	1	1	149	88	51	87	86	107	0.439024	1	1	1	1	1	1	1	1	1	1	1
89320064	A	G	G	G	G	G	G	1	1	1	1	1	1	140	43	28	76	67	68	1	1	1	0.469697	1	1	1	1	1	1	0.973333	1
49492323	G	T	T	T	T	T	T	1	1	1	1	1	1	126	58	35	99	74	95	1	1	0.447368	1	1	1	1	1	1	1	1	1
52208625	A	G	G	G	G	G	G	1	1	1	1	1	1	87	73	41	85	100	73	1	1	1	1	1	1	1	1	0.954545	0.5	1	1
21839742	C	T	T	T	T	T	T	1	1	1	1	1	1	29	32	20	53	46	96	1	1	1	1	1	1	1	1	0.454545	1	1	1
82327570	A	G	G	G	G	G	G	1	1	1	1	1	1	137	48	31	46	62	36	1	1	1	1	1	1	1	1	1	0.988764	1	0.466667
31334886	T	C	C	C	C	C	C	1	1	1	1	1	1	96	62	59	128	64	80	1	1	1	1	1	0.461538	1	1	1	1	1	1
116645895	C	T	T	T	T	T	T	1	1	1	1	1	1	40	38	29	39	18	32	0.5	1	0.964286	1	1	1	1	1	1	1	1	1
58043313	A	G	G	G	G	G	G	1	1	1	1	1	1	47	12	12	26	26	25	1	1	1	1	1	1	1	1	1	1	0.464789	1
46711866	G	C	C	C	C	C	C	1	1	1	1	1	1	80	72	17	50	36	36	1	1	1	1	1	1	1	1	1	0.469388	1	1
26649410	G	C	C	C	C	C	C	1	1	1	1	1	1	138	159	82	114	53	29	1	1	1	1	1	1	1	1	1	1	1	0.472362
70888482	A	G	G	G	G	G	G	1	1	1	1	1	1	22	13	17	33	11	28	1	0.47619	1	1	1	1	1	1	1	1	1	1
58043312	C	T	T	T	T	T	T	1	1	1	1	1	1	47	12	11	26	26	27	1	1	1	1	1	1	1	1	1	1	0.478873	1
66573697	G	A	A	A	A	A	A	1	1	1	1	1	1	82	18	40	81	93	213	1	0.48	1	1	1	1	1	1	1	1	1	1
2350	T	C	C	C	C	C	C	1	1	1	1	1	1	246	417	195	302	149	84	1	1	0.5	0.997175	0.99422	1	1	1	1	1	0.998031	0.992263
49442238	C	G	G	G	G	G	G	1	1	1	1	1	1	57	34	20	32	38	11	1	1	0.486486	1	1	1	1	1	1	1	1	1
49143397	T	C	C	C	C	C	C	1	1	1	1	1	1	318	272	72	134	158	45	1	1	1	1	0.489362	1	1	1	1	1	1	1
85003162	T	C	C	C	C	C	C	1	1	1	1	1	1	36	29	10	36	36	17	1	1	0.94	1	1	1	0.95	1	0.6	1	1	1
75812974	A	G	G	G	G	G	G	1	1	1	1	1	1	38	23	16	28	17	15	1	1	1	1	1	1	1	0.5	1	1	1	1
66572463	C	T	T	T	T	T	T	1	1	1	1	1	1	103	65	57	101	141	411	1	0.5	1	1	1	1	1	1	1	1	1	1
5522114	G	A	A	A	A	A	A	1	1	1	1	1	1	14	11	16	24	23	27	0.5	1	1	1	1	1	1	1	1	1	1	1
15200910	G	A	A	A	A	A	A	1	1	1	1	1	1	18	23	20	41	11	46	1	1	1	1	1	1	0.5	1	1	1	1	1
50906154	A	G	G	G	G	G	G	1	1	1	1	1	1	44	106	26	41	12	59	1	1	1	1	1	1	1	0.5	1	1	1	1
90304644	A	G	G	G	G	G	G	1	1	1	1	1	1	24	34	14	17	11	16	1	1	1	1	1	1	1	1	0.5	1	1	1
48287869	T	C	C	C	C	C	C	1	1	1	1	1	1	155	134	44	108	184	49	0.513889	0.992188	1	1	1	1	1	1	1	1	1	1
58043257	A	G	G	G	G	G	G	1	1	1	1	1	1	35	11	14	25	23	37	1	1	1	1	1	1	1	1	1	1	0.506494	1
54797133	A	G	G	G	G	G	G	1	1	1	1	1	1	184	87	43	24	69	37	1	1	1	1	1	0.509804	1	1	1	1	1	1
107885432	A	G	G	G	G	G	G	1	1	1	1	1	1	45	28	32	43	62	23	1	1	1	1	1	1	0.510204	1	1	1	1	1
64879231	A	G	G	G	G	G	G	1	1	1	1	1	1	707	235	110	247	965	524	1	1	0.998195	0.997006	1	1	0.520833	1	1	1	1	0.995902
57668245	A	G	G	G	G	G	G	1	1	1	1	1	1	63	44	55	49	20	33	0.888889	1	1	1	0.95	1	1	0.875	1	0.8	1	1
26667699	T	C	C	C	C	C	C	1	1	1	1	1	1	125	81	53	86	47	47	1	1	1	1	1	1	1	1	1	1	1	0.516129
139045751	T	C	C	C	C	C	C	1	1	1	1	1	1	61	30	25	38	42	21	1	0.989583	1	1	1	1	0.87931	0.888889	1	0.790323	1	0.969697
114283381	C	A	A	A	A	A	A	1	1	1	1	1	1	46	67	45	82	155	75	1	1	1	0.521739	1	1	1	1	1	1	1	1
99354217	A	C	C	C	C	C	C	1	1	1	1	1	1	31	60	27	39	23	87	1	1	1	1	1	1	1	1	1	1	0.525	1
108990211	T	C	C	C	C	C	C	1	1	1	1	1	1	73	58	11	23	33	37	1	1	1	1	1	1	1	1	1	0.533333	1	1
48811241	A	G	G	G	G	G	G	1	1	1	1	1	1	81	63	47	63	23	46	1	1	1	0.987013	1	1	1	1	0.96	0.59322	1	1
13267681	C	T	T	T	T	T	T	1	1	1	1	1	1	43	33	21	50	17	50	1	1	1	1	1	1	1	1	1	1	0.541667	1
34623363	T	C	C	C	C	C	C	1	1	1	1	1	1	86	26	34	101	49	44	1	1	1	1	1	1	0.827586	1	0.714286	1	1	1
2568438	G	A	A	A	A	A	A	1	1	1	1	1	1	377	263	148	339	261	458	1	0.546218	1	1	1	1	1	1	1	1	1	1
70887778	G	A	A	A	A	A	A	1	1	1	1	1	1	31	71	29	45	31	44	1	0.555556	1	1	1	1	1	1	1	1	1	1
36594985	A	G	G	G	G	G	G	1	1	1	1	1	1	104	96	46	74	58	35	1	1	1	0.973684	1	1	0.590909	1	1	1	1	1
38150328	A	G	G	G	G	G	G	1	1	1	1	1	1	17	38	16	10	26	20	1	1	1	0.571429	1	1	1	1	1	1	1	1
130775917	C	T	T	T	T	T	T	1	1	1	1	1	1	296	151	56	100	104	19	1	1	1	1	1	1	1	1	1	1	1	0.571429
332610	G	T	T	T	T	T	T	1	1	1	1	1	1	31	14	26	32	14	15	1	1	1	1	1	1	1	1	0.733333	0.846154	1	1
18474761	C	T	T	T	T	T	T	1	1	1	1	1	1	216	125	68	184	128	193	1	1	1	1	0.583333	1	1	1	1	1	1	1
88573857	C	T	T	T	T	T	T	1	1	1	1	1	1	71	70	70	37	53	30	1	1	1	1	1	1	1	1	1	1	1	0.595238
97806925	T	C	C	C	C	C	C	1	1	1	1	1	1	65	44	19	25	56	27	1	1	1	1	1	0.6	1	1	1	1	1	1
18342564	A	G	G	G	G	G	G	1	1	1	1	1	1	64	41	38	76	55	73	1	0.925926	1	0.974359	0.947368	0.944444	1	0.928571	0.888889	1	1	1
31745439	A	G	G	G	G	G	G	1	1	1	1	1	1	39	28	51	73	42	38	1	1	1	1	1	1	0.611111	1	1	1	1	1
49265523	A	G	G	G	G	G	G	1	1	1	1	1	1	33	25	45	84	37	14	1	1	1	0.96875	1	1	1	1	1	1	0.875	0.772727
74453544	G	T	T	T	T	T	T	1	1	1	1	1	1	20	14	10	11	10	15	1	1	1	1	1	1	1	1	0.666667	0.95	1	1
7744863	G	C	C	C	C	C	C	1	1	1	1	1	1	32	21	13	15	11	17	1	1	1	1	0.967742	1	0.945455	0.833333	1	1	0.941176	0.935484
107881749	C	T	T	T	T	T	T	1	1	1	1	1	1	32	11	19	36	21	18	1	1	1	1	1	1	0.625	1	1	1	1	1
50708448	A	G	G	G	G	G	G	1	1	1	1	1	1	169	39	26	130	112	120	1	1	1	1	1	1	1	0.633663	1	1	1	1
70888135	G	A	A	A	A	A	A	1	1	1	1	1	1	49	15	28	42	14	37	1	0.647059	1	1	1	1	1	1	1	1	1	1
20297657	G	A	A	A	A	A	A	1	1	1	1	1	1	55	24	38	61	50	66	1	1	1	1	1	1	1	1	0.65	1	1	1
39767110	T	C	C	C	C	C	C	1	1	1	1	1	1	23	28	13	18	26	23	1	1	1	1	1	1	0.92	1	0.857143	0.965517	1	0.92
43794852	A	G	G	G	G	G	G	1	1	1	1	1	1	730	404	207	397	761	289	1	1	1	1	0.995122	0.99435	1	1	1	1	1	0.67632
36862255	G	A	A	A	A	A	A	1	1	1	1	1	1	22	41	42	44	16	26	1	1	1	1	1	1	1	1	1	1	0.666667	1
53310976	T	C	C	C	C	C	C	1	1	1	1	1	1	44	30	36	39	32	55	1	1	1	1	1	1	0.666667	1	1	1	1	1
4795099	C	T	T	T	T	T	T	1	1	1	1	1	1	100	71	55	124	41	180	1	1	1	1	1	1	1	1	0.666667	1	1	1
27039863	T	C	C	C	C	C	C	1	1	1	1	1	1	147	67	36	85	95	81	1	0.666667	1	1	1	1	1	1	1	1	1	1
3110718	T	C	C	C	C	C	C	1	1	1	1	1	1	15	15	19	18	10	14	1	1	1	1	1	1	1	1	1	1	1	0.666667
12713968	A	G	G	G	G	G	G	1	1	1	1	1	1	20	12	20	22	14	51	1	1	1	1	1	1	1	0.666667	1	1	1	1
947744	A	G	G	G	G	G	G	1	1	1	1	1	1	76	90	64	86	47	82	0.666667	1	1	1	1	1	1	1	1	1	1	1
23837868	C	T	T	T	T	T	T	1	1	1	1	1	1	31	37	25	26	52	42	1	1	1	1	1	1	0.666667	1	1	1	1	1
97837583	C	G	G	G	G	G	G	1	1	1	1	1	1	66	27	17	29	43	40	1	1	1	1	1	1	1	0.676471	1	1	1	1
38756022	T	C	C	C	C	C	C	1	1	1	1	1	1	31	32	22	25	10	27	0.923077	1	0.961538	0.947368	0.944444	1	1	1	1	0.964286	1	0.939394
10535831	G	A	A	A	A	A	A	1	1	1	1	1	1	37	74	100	108	29	90	1	1	1	1	1	1	1	0.75	0.941176	1	1	1
62854964	C	G	G	G	G	G	G	1	1	1	1	1	1	131	85	70	147	82	198	1	1	1	1	1	1	1	1	1	1	0.692308	1
112710155	G	A	A	A	A	A	A	1	1	1	1	1	1	27	28	26	53	36	24	0.882353	0.913043	1	1	1	0.941176	1	1	1	0.958333	1	1
42210631	T	G	G	G	G	G	G	1	1	1	1	1	1	51	20	21	64	62	19	1	1	1	1	1	0.941176	1	1	1	0.909091	0.882353	0.96875
112710154	T	C	C	C	C	C	C	1	1	1	1	1	1	27	29	26	53	36	24	0.888889	0.913043	1	1	1	0.944444	1	1	1	0.958333	1	1
72916901	G	C	C	C	C	C	C	1	1	1	1	1	1	38	18	18	42	21	42	1	1	1	1	1	1	0.925926	0.923077	1	0.857143	1	1
57969239	A	G	G	G	G	G	G	1	1	1	1	1	1	80	14	18	34	13	11	1	0.8	0.978723	1	1	1	1	1	1	0.928571	1	1
43954723	G	A	A	A	A	A	A	1	1	1	1	1	1	62	46	41	96	76	42	1	1	1	1	1	1	1	1	1	0.987952	1	0.720339
63177700	T	C	C	C	C	C	C	1	1	1	1	1	1	21	16	24	20	11	11	1	1	1	1	1	1	1	1	1	0.708333	1	1
133654740	G	A	A	A	A	A	A	1	1	1	1	1	1	32	30	15	32	10	41	1	1	1	1	1	1	1	1	0.714286	1	1	1
88082636	T	C	C	C	C	C	C	1	1	1	1	1	1	83	55	66	113	43	92	0.857143	1	1	1	1	1	0.958333	1	1	0.945946	0.956522	1
50609632	G	A	A	A	A	A	A	1	1	1	1	1	1	19	48	23	19	12	25	1	1	1	1	1	0.853659	1	0.891892	1	1	1	0.98
14972656	C	T	T	T	T	T	T	1	1	1	1	1	1	37	22	22	44	19	32	1	1	1	1	1	1	0.875	0.857143	1	1	1	1
57668343	G	C	C	C	C	C	C	1	1	1	1	1	1	49	22	51	39	16	27	1	1	1	1	1	1	1	1	1	0.8125	1	0.92
332614	C	A	A	A	A	A	A	1	1	1	1	1	1	32	15	27	31	14	15	1	1	1	1	1	1	1	1	0.833333	0.9	1	1
72916894	A	C	C	C	C	C	C	1	1	1	1	1	1	42	18	23	46	26	49	1	1	1	1	1	1	0.925926	0.933333	1	0.875	1	1
85901765	C	T	T	T	T	T	T	1	1	1	1	1	1	43	35	22	61	57	48	0.8	1	1	0.973684	1	1	0.962963	1	1	1	1	1
31871672	G	A	A	A	A	A	A	1	1	1	1	1	1	82	78	30	59	46	44	1	1	1	0.988506	1	1	1	0.972973	0.777778	1	1	1
72916892	C	T	T	T	T	T	T	1	1	1	1	1	1	42	20	23	46	29	49	1	1	1	1	1	1	0.928571	0.9375	1	0.882353	1	1
120714629	C	T	T	T	T	T	T	1	1	1	1	1	1	40	19	26	55	35	61	1	1	1	0.948718	1	1	1	0.8	1	1	1	1
50906106	C	G	G	G	G	G	G	1	1	1	1	1	1	36	105	22	42	15	56	1	1	1	1	1	1	1	0.75	1	1	1	1
50576057	A	G	G	G	G	G	G	1	1	1	1	1	1	41	17	17	33	10	18	1	1	1	1	1	1	1	1	0.75	1	1	1
112710159	A	G	G	G	G	G	G	1	1	1	1	1	1	27	32	26	53	38	24	0.894737	0.954545	1	1	1	0.947368	1	1	1	0.958333	1	1
20116330	A	G	G	G	G	G	G	1	1	1	1	1	1	87	93	47	66	14	52	0.947368	1	0.989474	0.958904	1	1	1	0.964286	0.96875	0.988764	0.967742	0.970874
28834522	A	G	G	G	G	G	G	1	1	1	1	1	1	129	76	58	133	54	100	1	1	1	1	1	1	1	0.979167	0.777778	1	1	1
50609684	T	C	C	C	C	C	C	1	1	1	1	1	1	15	41	20	19	11	22	1	1	1	0.984375	1	0.883721	1	0.931034	1	1	1	0.960784
24796679	T	C	C	C	C	C	C	1	1	1	1	1	1	73	42	22	57	40	31	1	0.971429	1	1	0.925926	1	1	1	0.866667	1	1	1
121141779	A	G	G	G	G	G	G	1	1	1	1	1	1	48	37	24	26	32	28	1	1	1	1	1	1	1	1	0.770833	1	1	1
50609647	T	C	C	C	C	C	C	1	1	1	1	1	1	19	53	26	21	12	26	1	1	0.956522	1	1	0.93617	1	0.897436	1	1	1	0.982143
59365888	T	C	C	C	C	C	C	1	1	1	1	1	1	43	45	15	38	25	33	1	1	0.97619	1	1	1	1	0.954545	0.846154	1	1	1
23734400	T	C	C	C	C	C	C	1	1	1	1	1	1	91	79	46	82	31	135	1	1	1	1	1	1	1	0.777778	1	1	1	1
70887724	T	C	C	C	C	C	C	1	1	1	1	1	1	36	68	42	70	28	44	1	0.809524	1	1	1	1	0.96875	1	1	1	1	1
72916881	C	T	T	T	T	T	T	1	1	1	1	1	1	45	33	36	72	33	65	1	1	1	1	1	1	0.947368	0.913043	1	0.92	1	1
57517701	T	G	G	G	G	G	G	1	1	1	1	1	1	108	23	36	57	21	35	1	1	1	1	0.896552	1	0.975	1	0.909091	1	1	1
88643892	A	G	G	G	G	G	G	1	1	1	1	1	1	71	17	26	19	25	74	1	1	1	1	1	1	1	1	0.785714	1	1	1
55592557	A	G	G	G	G	G	G	1	1	1	1	1	1	62	62	29	79	59	33	1	1	1	1	1	1	0.875	1	1	1	0.913043	1
121141788	T	C	C	C	C	C	C	1	1	1	1	1	1	40	36	21	26	33	30	1	1	1	1	1	1	1	1	0.788462	1	1	1
39619185	A	G	G	G	G	G	G	1	1	1	1	1	1	68	76	25	61	51	62	1	1	1	1	1	1	1	1	0.789474	1	1	1
39424086	T	C	C	C	C	C	C	1	1	1	1	1	1	27	80	38	46	13	45	0.947368	1	1	1	0.94	0.985507	1	0.980392	1	0.97619	0.982456	0.986301
69620911	T	G	G	G	G	G	G	1	1	1	1	1	1	31	19	24	37	28	30	1	1	1	1	1	1	1	1	0.8	1	1	1
2330528	A	G	G	G	G	G	G	1	1	1	1	1	1	432	474	117	243	230	160	1	1	1	1	1	1	1	1	0.806452	1	0.995	1
71051847	C	A	A	A	A	A	A	1	1	1	1	1	1	72	44	26	83	16	48	1	1	1	1	1	0.941176	1	0.9375	1	0.923077	1	1
51768060	G	A	A	A	A	A	A	1	1	1	1	1	1	12	38	18	35	15	12	1	1	0.975	1	0.882353	1	1	1	1	0.944444	1	1
14428594	G	A	A	A	A	A	A	1	1	1	1	1	1	28	44	13	16	10	27	1	0.962963	1	0.961538	1	0.882353	1	1	1	1	1	1
83055400	A	G	G	G	G	G	G	1	1	1	1	1	1	34	17	13	34	16	25	1	1	1	1	1	1	0.875	1	1	1	1	0.933333
27388190	T	C	C	C	C	C	C	1	1	1	1	1	1	67	58	24	68	51	29	0.875	1	1	1	1	1	1	1	1	1	0.939394	1
75781995	A	G	G	G	G	G	G	1	1	1	1	1	1	217	92	21	175	74	130	1	0.939394	1	0.981818	1	1	0.945946	1	1	1	0.95	1
50515962	T	G	G	G	G	G	G	1	1	1	1	1	1	88	105	53	39	35	115	0.875	1	1	0.987179	1	0.977612	0.988889	1	1	1	1	0.98913
59706545	A	G	G	G	G	G	G	1	1	1	1	1	1	66	47	30	50	31	29	1	1	1	1	1	1	0.818182	1	1	1	1	1
43937915	T	C	C	C	C	C	C	1	1	1	1	1	1	132	109	66	137	68	53	0.978261	1	0.990654	0.960526	0.96875	1	0.956989	1	1	1	0.964286	1
50516015	G	A	A	A	A	A	A	1	1	1	1	1	1	38	69	35	11	20	83	0.866667	1	1	1	1	0.973333	1	1	1	1	1	0.981132
135156049	T	A	A	A	A	A	A	1	1	1	1	1	1	53	38	45	49	24	49	1	1	0.973684	0.969697	0.984848	1	1	0.96875	1	0.965517	0.961538	1
45778676	A	G	G	G	G	G	G	1	1	1	1	1	1	51	52	28	18	10	38	1	1	1	1	0.866667	1	0.96	1	1	1	1	1
54392680	A	C	C	C	C	C	C	1	1	1	1	1	1	37	29	15	42	26	70	1	1	1	0.977778	1	1	1	0.894737	1	0.956522	1	1
55857889	G	A	A	A	A	A	A	1	1	1	1	1	1	21	40	24	19	22	24	0.9375	1	1	0.97619	1	1	1	1	0.916667	1	1	1
89221145	A	C	C	C	C	C	C	1	1	1	1	1	1	45	94	11	61	32	27	1	1	1	1	1	1	0.965517	0.956522	0.909091	1	1	1
5643197	T	A	A	A	A	A	A	1	1	1	1	1	1	26	17	10	16	34	29	1	1	1	1	1	1	0.833333	1	1	1	1	1
142999344	T	C	C	C	C	C	C	1	1	1	1	1	1	135	99	54	70	46	62	1	1	1	1	1	1	1	1	0.833333	1	1	1
41541197	T	C	C	C	C	C	C	1	1	1	1	1	1	76	55	11	38	41	23	1	1	1	1	1	1	1	0.833333	1	1	1	1
121141724	G	A	A	A	A	A	A	1	1	1	1	1	1	42	25	28	32	20	20	1	1	1	1	1	1	1	1	0.833333	1	1	1
2753	C	G	G	G	G	G	G	1	1	1	1	1	1	72	65	16	79	42	28	0.833333	1	1	1	1	1	1	1	1	1	1	1
135156110	G	C	C	C	C	C	C	1	1	1	1	1	1	36	32	40	54	24	35	1	1	1	0.973333	0.983051	1	0.948718	0.928571	1	1	1	1
86767150	G	T	T	T	T	T	T	1	1	1	1	1	1	75	28	23	29	39	26	1	0.98	1	1	1	1	1	0.928571	1	0.947368	1	0.980769
121141890	A	G	G	G	G	G	G	1	1	1	1	1	1	44	27	20	42	26	25	1	1	1	1	1	1	1	1	0.83871	1	1	1
14972786	G	A	A	A	A	A	A	1	1	1	1	1	1	50	30	32	48	33	62	0.964286	1	1	1	1	1	0.909091	1	1	1	0.966667	1
59365902	C	A	A	A	A	A	A	1	1	1	1	1	1	45	41	11	28	20	38	1	1	1	1	1	1	0.947368	1	0.894737	1	1	1
78756841	G	C	C	C	C	C	C	1	1	1	1	1	1	29	33	19	35	18	15	1	1	0.92	1	1	1	1	1	1	1	0.923077	1
18012191	A	G	G	G	G	G	G	1	1	1	1	1	1	15	23	30	18	17	27	1	1	1	0.897436	1	1	1	0.945946	1	1	1	1
24522255	G	A	A	A	A	A	A	1	1	1	1	1	1	93	52	84	139	42	96	0.966667	1	1	1	1	1	1	0.971429	1	1	0.923077	0.982456
50577069	T	G	G	G	G	G	G	1	1	1	1	1	1	36	22	25	27	16	16	1	0.923077	1	1	1	1	1	1	0.954545	1	0.96875	1
14972242	A	C	C	C	C	C	C	1	1	1	1	1	1	48	23	42	55	33	57	0.983051	1	1	1	1	1	1	0.92	1	0.945946	1	1
11227275	A	G	G	G	G	G	G	1	1	1	1	1	1	64	70	81	106	28	73	0.95	1	0.971429	1	0.928571	1	1	1	1	1	1	1
66445556	T	C	C	C	C	C	C	1	1	1	1	1	1	370	284	197	290	285	231	0.986486	1	0.99723	1	1	0.994118	0.969697	0.986842	0.958042	0.985019	0.980892	0.991968
17044080	T	C	C	C	C	C	C	1	1	1	1	1	1	108	48	47	67	64	97	1	1	0.981818	1	1	0.962963	0.966667	1	1	1	0.944444	1
38529768	C	G	G	G	G	G	G	1	1	1	1	1	1	98	46	14	22	18	40	1	1	1	1	1	1	1	1	0.857143	1	1	1
75850491	T	C	C	C	C	C	C	1	1	1	1	1	1	11	23	21	29	10	21	1	1	0.857143	1	1	1	1	1	1	1	1	1
52448085	A	C	C	C	C	C	C	1	1	1	1	1	1	38	19	26	60	20	25	1	1	1	1	1	0.857143	1	1	1	1	1	1
115293180	A	G	G	G	G	G	G	1	1	1	1	1	1	44	27	18	19	27	53	1	1	0.857143	1	1	1	1	1	1	1	1	1
22731330	A	C	C	C	C	C	C	1	1	1	1	1	1	34	23	20	45	21	12	1	1	1	0.857143	1	1	1	1	1	1	1	1
119050948	G	A	A	A	A	A	A	1	1	1	1	1	1	73	52	29	42	36	45	1	1	1	1	1	1	1	1	0.857143	1	1	1
17208076	T	C	C	C	C	C	C	1	1	1	1	1	1	33	17	12	34	17	30	1	1	1	1	0.857143	1	1	1	1	1	1	1
28495181	A	G	G	G	G	G	G	1	1	1	1	1	1	122	144	34	92	33	33	0.985915	0.979167	1	1	1	0.983607	1	0.964286	1	0.944444	1	1
142999331	A	G	G	G	G	G	G	1	1	1	1	1	1	97	61	42	47	28	57	1	1	1	0.983871	1	1	1	1	1	1	0.875	1
84808714	C	T	T	T	T	T	T	1	1	1	1	1	1	66	38	16	41	43	17	1	1	1	1	0.916667	0.979592	1	1	1	1	1	0.964286
14972102	T	A	A	A	A	A	A	1	1	1	1	1	1	29	17	25	21	23	34	1	1	1	1	1	1	1	1	1	1	0.888889	0.972222
40176457	C	G	G	G	G	G	G	1	1	1	1	1	1	154	128	16	79	95	127	1	1	1	1	1	0.862069	1	1	1	1	1	1
45757931	A	C	C	C	C	C	C	1	1	1	1	1	1	64	21	11	26	27	31	1	1	1	1	1	1	1	0.916667	1	1	0.947368	1
50009776	A	G	G	G	G	G	G	1	1	1	1	1	1	79	73	11	84	63	39	1	1	0.935484	1	1	1	1	1	1	1	0.928571	1
28344078	C	A	A	A	A	A	A	1	1	1	1	1	1	34	22	16	27	13	22	1	1	1	1	1	0.92	1	1	1	1	1	0.945946
34689826	C	T	T	T	T	T	T	1	1	1	1	1	1	47	97	21	32	41	28	1	1	1	0.983871	1	1	0.966667	0.945946	1	1	0.969697	1
39892742	C	T	T	T	T	T	T	1	1	1	1	1	1	31	34	17	22	14	26	0.866667	1	1	1	1	1	1	1	1	1	1	1
89221095	A	G	G	G	G	G	G	1	1	1	1	1	1	71	177	44	117	51	46	0.882353	1	1	1	1	1	1	0.986486	1	1	1	1
43706678	T	C	C	C	C	C	C	1	1	1	1	1	1	16	29	16	25	27	24	1	1	0.941176	1	1	1	1	0.928571	1	1	1	1
135155938	T	C	C	C	C	C	C	1	1	1	1	1	1	34	41	28	29	16	36	1	1	1	1	1	1	1	0.916667	1	1	0.955556	1
86766892	T	C	C	C	C	C	C	1	1	1	1	1	1	31	18	11	34	23	18	1	1	1	1	1	1	1	1	1	1	0.928571	0.944444
74118067	T	G	G	G	G	G	G	1	1	1	1	1	1	32	43	10	41	15	13	0.981132	1	0.977273	1	1	1	1	1	1	0.941176	1	0.973684
81908474	A	C	C	C	C	C	C	1	1	1	1	1	1	10	35	19	16	13	28	1	1	1	1	1	1	1	1	0.909091	0.965517	1	1
42653183	A	G	G	G	G	G	G	1	1	1	1	1	1	19	29	14	25	19	20	1	1	1	1	1	0.875	1	1	1	1	1	1
108806006	A	G	G	G	G	G	G	1	1	1	1	1	1	17	15	13	38	14	20	1	1	1	1	1	1	1	1	1	1	0.875	1
80537215	T	C	C	C	C	C	C	1	1	1	1	1	1	59	51	19	59	35	51	0.875	1	1	1	1	1	1	1	1	1	1	1
28344069	C	G	G	G	G	G	G	1	1	1	1	1	1	31	19	16	26	12	20	1	1	1	1	1	0.904762	1	1	1	1	1	0.970588
29639042	G	A	A	A	A	A	A	1	1	1	1	1	1	76	48	59	80	35	43	1	1	0.97619	0.967213	1	1	0.980392	0.953488	1	1	1	1
74453926	A	G	G	G	G	G	G	1	1	1	1	1	1	42	33	13	42	48	36	1	0.975	0.986111	1	1	1	1	0.916667	1	1	1	1
115292305	A	G	G	G	G	G	G	1	1	1	1	1	1	31	29	29	27	29	20	1	1	1	1	1	1	1	0.967742	0.959184	0.95122	1	1
29648544	A	T	T	T	T	T	T	1	1	1	1	1	1	53	43	40	76	25	38	0.9375	0.941176	1	1	1	1	1	1	1	1	1	1
61772517	T	C	C	C	C	C	C	1	1	1	1	1	1	104	97	21	91	45	126	1	1	1	1	1	0.955556	0.967213	0.97561	0.980392	1	1	1
116646239	A	G	G	G	G	G	G	1	1	1	1	1	1	42	57	35	53	29	58	1	0.974359	1	0.978723	1	1	1	1	1	0.962963	1	0.962963
59705856	T	C	C	C	C	C	C	1	1	1	1	1	1	30	22	18	38	16	10	1	1	1	1	1	1	1	0.88	1	1	1	1
40176520	A	G	G	G	G	G	G	1	1	1	1	1	1	140	113	14	75	94	106	1	1	1	1	1	0.88	1	1	1	1	1	1
86767500	C	T	T	T	T	T	T	1	1	1	1	1	1	324	203	59	152	182	78	0.952381	1	1	1	1	1	0.993506	1	0.964602	0.993485	0.984848	0.991736
8739	T	G	G	G	G	G	G	1	1	1	1	1	1	55	69	52	56	23	29	1	0.964286	1	1	1	1	0.945946	0.970588	1	1	1	1
14428612	G	A	A	A	A	A	A	1	1	1	1	1	1	30	55	15	18	10	32	1	1	1	0.965517	1	0.916667	1	1	1	1	1	1
18342308	C	T	T	T	T	T	T	1	1	1	1	1	1	59	27	33	67	30	74	1	1	1	1	1	0.882353	1	1	1	1	1	1
14972721	A	G	G	G	G	G	G	1	1	1	1	1	1	57	34	26	41	23	21	1	1	1	1	1	1	0.882353	1	1	1	1	1
40214862	T	C	C	C	C	C	C	1	1	1	1	1	1	15	23	17	71	49	46	1	0.882353	1	1	1	1	1	1	1	1	1	1
79134620	C	G	G	G	G	G	G	1	1	1	1	1	1	36	33	16	34	17	23	1	1	1	1	1	1	1	1	1	0.882353	1	1
115292298	C	T	T	T	T	T	T	1	1	1	1	1	1	33	27	31	28	30	20	1	1	1	1	1	1	1	0.970588	0.958333	0.953488	1	1
41507475	T	C	C	C	C	C	C	1	1	1	1	1	1	87	83	72	113	67	103	1	0.981481	1	1	1	1	1	1	0.956522	1	0.944444	1
115292273	C	T	T	T	T	T	T	1	1	1	1	1	1	42	33	33	35	32	21	1	1	1	0.981818	1	1	1	0.985915	0.962963	0.953488	1	1
42546136	A	C	C	C	C	C	C	1	1	1	1	1	1	91	58	13	29	55	59	1	1	0.962963	1	1	1	1	0.956522	1	1	1	0.964912
92024888	T	G	G	G	G	G	G	1	1	1	1	1	1	37	46	30	35	14	54	0.965517	1	0.980392	0.967742	1	1	1	1	1	1	1	0.972222
86767474	A	G	G	G	G	G	G	1	1	1	1	1	1	337	211	70	151	192	95	0.958333	1	1	0.995098	1	1	0.993548	1	0.96	0.99705	0.986726	0.996109
61556920	G	T	T	T	T	T	T	1	1	1	1	1	1	48	31	27	70	37	17	1	1	1	1	1	1	1	1	1	1	0.888889	1
2915888	C	A	A	A	A	A	A	1	1	1	1	1	1	24	26	19	25	19	19	1	1	1	1	1	1	1	0.888889	1	1	1	1
17228737	C	A	A	A	A	A	A	1	1	1	1	1	1	27	18	18	33	30	22	1	1	1	1	1	1	0.888889	1	1	1	1	1
59706572	A	G	G	G	G	G	G	1	1	1	1	1	1	69	37	31	55	25	21	1	1	1	1	1	1	0.888889	1	1	1	1	1
59706574	G	A	A	A	A	A	A	1	1	1	1	1	1	68	34	33	51	23	19	1	1	1	1	1	1	0.888889	1	1	1	1	1
14972103	G	T	T	T	T	T	T	1	1	1	1	1	1	29	17	24	21	26	33	1	1	1	1	1	1	1	1	1	1	0.888889	1
19141270	A	G	G	G	G	G	G	1	1	1	1	1	1	25	10	29	19	15	41	1	1	1	1	0.888889	1	1	1	1	1	1	1
43008238	A	G	G	G	G	G	G	1	1	1	1	1	1	22	20	13	22	13	21	1	1	1	1	1	1	1	1	0.888889	1	1	1
97070444	G	A	A	A	A	A	A	1	1	1	1	1	1	18	26	14	24	15	10	1	1	1	1	1	1	1	1	1	1	0.888889	1
75499895	A	G	G	G	G	G	G	1	1	1	1	1	1	60	37	22	52	20	59	0.925926	1	1	1	1	0.964286	1	1	1	1	1	1
28344085	C	T	T	T	T	T	T	1	1	1	1	1	1	34	22	18	30	15	22	1	1	1	1	1	0.931034	1	1	1	1	1	0.959184
24218595	T	A	A	A	A	A	A	1	1	1	1	1	1	71	41	43	81	10	37	1	1	1	0.984375	1	0.928571	1	0.977778	1	1	1	1
114343382	G	C	C	C	C	C	C	1	1	1	1	1	1	29	37	18	32	17	32	1	1	1	1	1	1	1	1	1	1	0.95	0.941176
2329670	T	C	C	C	C	C	C	1	1	1	1	1	1	302	187	89	179	157	125	1	1	1	1	1	1	1	1	0.891304	1	1	1
17044184	T	C	C	C	C	C	C	1	1	1	1	1	1	152	43	68	102	86	111	1	1	1	1	1	0.95122	0.958333	1	1	1	0.984848	1
97070441	T	A	A	A	A	A	A	1	1	1	1	1	1	18	26	11	29	15	10	1	1	1	1	1	1	1	1	1	1	0.894737	1
2504391	A	C	C	C	C	C	C	1	1	1	1	1	1	39	25	22	55	22	26	1	1	0.894737	1	1	1	1	1	1	1	1	1
39619204	A	G	G	G	G	G	G	1	1	1	1	1	1	102	120	53	116	76	87	1	1	1	1	1	1	1	1	0.896552	1	1	1
95402087	A	G	G	G	G	G	G	1	1	1	1	1	1	51	21	37	39	25	47	1	1	1	1	1	1	1	1	1	1	0.896552	1
71446711	C	T	T	T	T	T	T	1	1	1	1	1	1	33	27	25	50	23	13	1	1	1	1	1	1	1	0.965517	1	1	1	0.931034
26333687	T	G	G	G	G	G	G	1	1	1	1	1	1	20	32	16	14	15	54	1	1	0.961538	0.935484	1	1	1	1	1	1	1	1
6355932	T	C	C	C	C	C	C	1	1	1	1	1	1	75	31	31	38	35	36	1	1	0.897436	1	1	1	1	1	1	1	1	1
948096	A	G	G	G	G	G	G	1	1	1	1	1	1	66	50	58	47	44	117	1	1	0.981481	1	1	1	1	1	1	1	0.916667	1
73628886	T	C	C	C	C	C	C	1	1	1	1	1	1	262	242	159	313	176	174	0.977528	1	1	0.998113	1	0.99	1	1	0.933333	1	1	1
41399163	A	G	G	G	G	G	G	1	1	1	1	1	1	86	119	36	65	41	18	1	0.987805	1	1	1	1	0.965517	1	0.961538	1	0.984615	1
73607982	G	C	C	C	C	C	C	1	1	1	1	1	1	27	16	13	12	12	20	1	1	1	0.9	1	1	1	1	1	1	1	1
23067943	C	T	T	T	T	T	T	1	1	1	1	1	1	53	38	28	47	21	21	0.9	1	1	1	1	1	1	1	1	1	1	1
68987337	G	A	A	A	A	A	A	1	1	1	1	1	1	26	25	16	34	42	18	1	1	1	1	1	1	0.9	1	1	1	1	1
36737947	G	A	A	A	A	A	A	1	1	1	1	1	1	53	20	36	36	10	45	1	1	1	1	0.9	1	1	1	1	1	1	1
78756750	A	G	G	G	G	G	G	1	1	1	1	1	1	50	28	14	45	24	16	1	1	1	1	1	1	1	1	1	1	0.9	1
8567357	T	C	C	C	C	C	C	1	1	1	1	1	1	57	30	18	61	48	101	1	1	1	1	1	1	1	1	1	0.9	1	1
88995925	A	G	G	G	G	G	G	1	1	1	1	1	1	21	26	14	26	27	21	1	0.9	1	1	1	1	1	1	1	1	1	1
64586880	G	A	A	A	A	A	A	1	1	1	1	1	1	66	29	14	88	77	72	1	1	1	1	1	1	0.9	1	1	1	1	1
80489642	T	C	C	C	C	C	C	1	1	1	1	1	1	49	28	30	33	35	40	1	1	1	1	1	0.9	1	1	1	1	1	1
49080714	A	G	G	G	G	G	G	1	1	1	1	1	1	106	126	20	64	29	24	1	0.9375	1	1	1	1	0.978723	1	1	1	1	0.983871
49639068	C	T	T	T	T	T	T	1	1	1	1	1	1	21	19	15	26	14	23	0.947368	1	0.956522	1	1	1	1	1	1	1	1	1
50009844	T	C	C	C	C	C	C	1	1	1	1	1	1	71	64	10	83	50	39	1	1	0.966667	1	1	1	0.9375	1	1	1	1	1
17610164	C	T	T	T	T	T	T	1	1	1	1	1	1	45	42	25	77	35	84	1	1	1	1	1	1	0.904762	1	1	1	1	1
44410697	C	G	G	G	G	G	G	1	1	1	1	1	1	121	59	50	78	96	98	1	1	1	0.953125	0.983607	1	0.968254	1	1	1	1	1
49639076	A	G	G	G	G	G	G	1	1	1	1	1	1	23	22	15	20	14	25	0.95	1	0.956522	1	1	1	1	1	1	1	1	1
18012185	G	C	C	C	C	C	C	1	1	1	1	1	1	15	24	31	18	19	27	1	1	1	0.906977	1	1	1	1	1	1	1	1
28344081	G	A	A	A	A	A	A	1	1	1	1	1	1	35	22	15	30	15	22	1	1	1	1	1	0.931034	1	1	1	1	1	0.977273
17044988	A	G	G	G	G	G	G	1	1	1	1	1	1	75	46	51	65	52	77	1	1	0.962963	1	1	1	1	1	1	0.975	1	0.970588
87375423	A	G	G	G	G	G	G	1	1	1	1	1	1	74	30	30	53	32	95	1	1	1	0.98	1	1	1	1	1	1	0.928571	1
111053720	G	A	A	A	A	A	A	1	1	1	1	1	1	98	113	24	69	45	66	1	0.982143	1	1	0.974359	1	1	0.988372	1	1	0.978261	0.985714
75499928	G	A	A	A	A	A	A	1	1	1	1	1	1	36	20	11	35	14	37	1	1	1	1	1	1	1	1	1	0.909091	1	1
16262424	A	G	G	G	G	G	G	1	1	1	1	1	1	62	80	19	157	76	91	1	1	1	1	1	1	1	1	0.909091	1	1	1
30509544	T	C	C	C	C	C	C	1	1	1	1	1	1	57	18	42	52	19	17	1	1	1	1	0.909091	1	1	1	1	1	1	1
66127330	T	C	C	C	C	C	C	1	1	1	1	1	1	14	10	18	11	16	18	1	1	1	0.909091	1	1	1	1	1	1	1	1
76949278	C	T	T	T	T	T	T	1	1	1	1	1	1	53	33	10	10	21	45	1	1	1	1	1	1	1	0.909091	1	1	1	1
41635644	G	A	A	A	A	A	A	1	1	1	1	1	1	34	22	20	61	30	16	1	1	1	1	0.909091	1	1	1	1	1	1	1
62543982	A	G	G	G	G	G	G	1	1	1	1	1	1	72	107	36	54	47	68	1	1	1	1	1	1	1	1	0.939394	1	1	0.971831
18012077	A	G	G	G	G	G	G	1	1	1	1	1	1	16	28	34	22	21	17	1	1	1	0.947368	1	1	1	0.964286	1	1	1	1
25306666	T	G	G	G	G	G	G	1	1	1	1	1	1	21	19	14	17	23	24	1	1	0.942857	1	0.969697	1	1	1	1	1	1	1
74374195	A	G	G	G	G	G	G	1	1	1	1	1	1	26	33	27	29	12	52	1	1	1	1	1	1	1	0.913043	1	1	1	1
3373694	A	G	G	G	G	G	G	1	1	1	1	1	1	48	40	14	54	16	21	1	0.928571	1	1	1	1	1	1	1	1	1	0.984848
28432496	T	C	C	C	C	C	C	1	1	1	1	1	1	39	44	34	24	34	17	1	1	1	0.97619	1	1	1	1	1	1	0.9375	1
86767182	A	G	G	G	G	G	G	1	1	1	1	1	1	157	53	35	69	68	76	1	0.975309	1	1	1	1	1	0.960784	1	0.989362	1	0.988764
53096066	T	A	A	A	A	A	A	1	1	1	1	1	1	86	43	12	49	37	20	1	1	0.982143	0.966667	0.965517	1	1	1	1	1	1	1
11883793	T	C	C	C	C	C	C	1	1	1	1	1	1	16	12	67	25	15	62	1	1	1	0.97561	1	0.939394	1	1	1	1	1	1
38401109	T	C	C	C	C	C	C	1	1	1	1	1	1	58	31	16	34	21	36	1	1	1	0.975	1	0.966667	1	1	1	1	1	0.974359
97127164	G	C	C	C	C	C	C	1	1	1	1	1	1	66	47	70	112	53	103	1	1	1	1	1	1	1	0.96	1	1	0.956522	1
11884464	A	G	G	G	G	G	G	1	1	1	1	1	1	29	18	11	18	17	12	1	1	1	1	1	1	1	1	1	1	0.916667	1
84809154	T	C	C	C	C	C	C	1	1	1	1	1	1	16	24	14	32	23	25	1	1	1	1	1	1	1	1	1	1	1	0.916667
42653176	A	C	C	C	C	C	C	1	1	1	1	1	1	20	27	11	26	16	19	1	1	1	1	1	1	1	1	1	1	0.916667	1
27388104	C	A	A	A	A	A	A	1	1	1	1	1	1	50	28	31	55	44	21	1	1	1	1	1	1	1	1	1	1	0.916667	1
43454565	T	C	C	C	C	C	C	1	1	1	1	1	1	31	36	22	11	15	43	1	1	1	1	1	0.916667	1	1	1	1	1	1
72590813	T	C	C	C	C	C	C	1	1	1	1	1	1	35	19	19	34	12	68	1	1	1	1	1	1	1	0.916667	1	1	1	1
135156034	G	C	C	C	C	C	C	1	1	1	1	1	1	53	42	46	53	25	56	1	1	1	0.96875	0.982759	1	1	1	1	1	0.967213	1
86767242	A	G	G	G	G	G	G	1	1	1	1	1	1	232	75	53	95	100	115	1	0.984	1	1	1	1	0.977011	0.978022	1	0.994382	1	0.985612
117321465	C	T	T	T	T	T	T	1	1	1	1	1	1	27	20	26	19	29	31	1	1	1	0.92	1	1	1	1	1	1	1	1
51930710	G	A	A	A	A	A	A	1	1	1	1	1	1	293	247	52	572	340	264	1	1	1	1	1	0.957447	1	1	1	1	0.962963	1
30223912	T	C	C	C	C	C	C	1	1	1	1	1	1	156	116	59	169	102	78	1	1	1	0.981651	1	0.983333	1	1	0.955556	1	1	1
30092585	C	T	T	T	T	T	T	1	1	1	1	1	1	194	91	41	101	77	102	1	1	0.986395	1	1	1	1	1	1	0.952381	1	0.982143
86767357	T	C	C	C	C	C	C	1	1	1	1	1	1	227	183	59	136	149	73	1	1	1	0.971429	1	1	0.981818	1	1	0.996429	0.98125	0.990385
75499840	G	C	C	C	C	C	C	1	1	1	1	1	1	48	43	32	41	16	56	1	1	1	1	1	1	0.95	1	1	1	1	0.971429
50651963	G	A	A	A	A	A	A	1	1	1	1	1	1	121	83	76	99	112	141	1	1	1	1	1	0.984127	1	0.962963	0.97561	1	1	1
74497653	G	A	A	A	A	A	A	1	1	1	1	1	1	47	57	18	47	38	72	1	1	1	1	0.923077	1	1	1	1	1	1	1
23887881	G	A	A	A	A	A	A	1	1	1	1	1	1	20	33	14	31	29	194	1	1	1	1	1	0.923077	1	1	1	1	1	1
947726	T	C	C	C	C	C	C	1	1	1	1	1	1	63	62	41	69	38	61	1	1	1	1	1	1	0.923077	1	1	1	1	1
44410635	G	A	A	A	A	A	A	1	1	1	1	1	1	136	71	66	97	107	105	1	1	1	0.924242	1	1	1	1	1	1	1	1
16278855	G	A	A	A	A	A	A	1	1	1	1	1	1	45	38	42	58	14	16	1	1	1	0.98	1	0.944444	1	1	1	1	1	1
3586250	A	G	G	G	G	G	G	1	1	1	1	1	1	111	100	53	84	56	131	1	1	0.9875	1	1	1	0.966667	1	1	1	1	0.970588
2631422	G	A	A	A	A	A	A	1	1	1	1	1	1	45	58	20	55	23	43	1	0.956522	1	1	1	1	1	1	1	0.96875	1	1
27388259	G	A	A	A	A	A	A	1	1	1	1	1	1	72	45	25	57	54	34	1	1	1	1	1	1	1	1	1	1	0.925926	1
133654803	T	C	C	C	C	C	C	1	1	1	1	1	1	31	33	18	29	10	43	1	1	1	1	1	1	1	1	1	1	0.925926	1
129905767	A	G	G	G	G	G	G	1	1	1	1	1	1	34	28	13	24	32	23	1	1	0.925926	1	1	1	1	1	1	1	1	1
66755837	C	T	T	T	T	T	T	1	1	1	1	1	1	28	35	19	39	43	17	1	1	1	1	0.925926	1	1	1	1	1	1	1
97127199	T	C	C	C	C	C	C	1	1	1	1	1	1	55	46	44	85	49	60	1	1	0.976744	1	1	1	1	1	1	1	0.95	1
50515963	G	A	A	A	A	A	A	1	1	1	1	1	1	86	98	52	37	34	112	0.935484	1	1	1	1	0.992188	1	1	1	1	1	1
77493278	A	G	G	G	G	G	G	1	1	1	1	1	1	164	138	43	171	63	86	1	1	0.985507	1	1	1	0.988701	0.971429	1	1	0.989247	0.992908
86585517	A	G	G	G	G	G	G	1	1	1	1	1	1	18	24	25	37	17	18	1	1	1	1	1	1	1	1	1	1	0.928571	1
74497636	C	T	T	T	T	T	T	1	1	1	1	1	1	54	61	25	57	41	74	1	1	1	1	0.928571	1	1	1	1	1	1	1
34261630	C	T	T	T	T	T	T	1	1	1	1	1	1	18	20	21	22	14	13	1	1	1	1	1	1	1	1	1	1	0.928571	1
28432478	T	C	C	C	C	C	C	1	1	1	1	1	1	35	30	20	11	20	13	1	1	1	0.928571	1	1	1	1	1	1	1	1
119959937	A	G	G	G	G	G	G	1	1	1	1	1	1	28	47	12	16	13	16	1	1	1	1	1	1	0.928571	1	1	1	1	1
11968036	A	C	C	C	C	C	C	1	1	1	1	1	1	46	36	14	33	23	35	1	1	1	1	1	1	1	1	0.928571	1	1	1
71346080	T	G	G	G	G	G	G	1	1	1	1	1	1	100	85	68	121	49	122	1	1	0.987952	1	0.981818	0.979167	1	1	1	1	1	0.980583
34982798	A	G	G	G	G	G	G	1	1	1	1	1	1	29	45	34	52	11	22	1	1	1	1	1	1	0.962963	0.966667	1	1	1	1
85901571	G	A	A	A	A	A	A	1	1	1	1	1	1	111	61	32	103	85	100	1	1	1	1	0.976744	1	1	1	1	1	0.970588	0.982759
43948990	A	G	G	G	G	G	G	1	1	1	1	1	1	32	34	36	28	33	37	1	1	1	0.968254	1	1	1	0.987342	1	1	1	0.974684
15697984	A	G	G	G	G	G	G	1	1	1	1	1	1	100	87	17	80	57	34	1	1	0.98913	1	1	1	1	1	0.941176	1	1	1
18012074	A	G	G	G	G	G	G	1	1	1	1	1	1	16	27	32	21	18	16	1	1	1	0.970588	1	1	1	0.96	1	1	1	1
107982260	T	C	C	C	C	C	C	1	1	1	1	1	1	315	113	28	211	170	78	0.952381	1	1	1	1	1	1	1	1	0.978261	1	1
115291983	C	T	T	T	T	T	T	1	1	1	1	1	1	61	47	61	79	22	42	0.966667	1	1	1	1	1	1	1	0.977273	0.986842	1	1
30118658	T	G	G	G	G	G	G	1	1	1	1	1	1	157	91	18	156	79	94	1	0.981132	1	1	1	1	0.983607	0.966102	1	1	1	1
7333089	T	G	G	G	G	G	G	1	1	1	1	1	1	164	172	45	140	116	73	1	1	0.994924	1	0.972603	1	1	1	1	1	1	0.963504
153222241	A	C	C	C	C	C	C	1	1	1	1	1	1	33	23	27	27	20	14	1	1	1	1	1	1	1	0.931034	1	1	1	1
17208337	A	G	G	G	G	G	G	1	1	1	1	1	1	51	31	54	92	52	91	1	1	1	1	1	0.931034	1	1	1	1	1	1
35706550	G	A	A	A	A	A	A	1	1	1	1	1	1	49	37	36	54	35	68	1	0.97619	1	1	1	1	0.978723	0.97619	1	1	1	1
86767215	C	T	T	T	T	T	T	1	1	1	1	1	1	231	80	56	89	94	113	1	0.984127	1	1	1	1	0.988506	0.978022	1	0.99435	1	0.986395
18012073	C	T	T	T	T	T	T	1	1	1	1	1	1	16	28	33	20	17	16	1	1	1	0.970588	1	1	1	0.961538	1	1	1	1
130066036	A	G	G	G	G	G	G	1	1	1	1	1	1	79	52	16	88	81	50	1	1	1	0.984375	0.970588	1	0.977778	1	1	1	1	1
114343407	G	C	C	C	C	C	C	1	1	1	1	1	1	55	68	28	49	24	43	1	1	1	1	1	1	1	1	1	1	0.967742	0.965517
43949322	T	C	C	C	C	C	C	1	1	1	1	1	1	28	20	31	28	15	14	1	1	1	1	1	1	1	1	1	1	1	0.933333
27388169	C	T	T	T	T	T	T	1	1	1	1	1	1	54	51	25	68	44	29	1	1	1	1	1	1	1	1	1	1	0.933333	1
112431877	T	C	C	C	C	C	C	1	1	1	1	1	1	29	11	15	42	15	39	1	1	1	1	0.933333	1	1	1	1	1	1	1
14983497	T	C	C	C	C	C	C	1	1	1	1	1	1	149	81	77	102	59	66	1	1	1	1	1	1	1	1	0.933333	1	1	1
55611615	T	C	C	C	C	C	C	1	1	1	1	1	1	16	24	14	20	13	14	1	1	0.933333	1	1	1	1	1	1	1	1	1
14972365	T	C	C	C	C	C	C	1	1	1	1	1	1	27	25	18	23	37	26	1	1	1	1	1	1	1	0.933333	1	1	1	1
25970325	G	A	A	A	A	A	A	1	1	1	1	1	1	67	69	39	122	35	69	1	1	1	1	1	1	0.933333	1	1	1	1	1
99778132	T	C	C	C	C	C	C	1	1	1	1	1	1	34	45	32	52	36	39	1	1	1	1	1	1	1	1	1	0.933333	1	1
86767400	T	C	C	C	C	C	C	1	1	1	1	1	1	277	210	76	140	191	92	1	1	1	0.98773	1	1	1	1	0.988889	0.99361	0.972067	0.99115
58590622	T	G	G	G	G	G	G	1	1	1	1	1	1	59	76	30	39	35	31	0.962963	0.984615	1	1	1	1	0.985915	1	1	1	1	1
116647174	A	G	G	G	G	G	G	1	1	1	1	1	1	85	62	26	67	66	108	1	1	1	1	0.985915	1	1	0.980392	0.967742	1	1	1
19400886	A	C	C	C	C	C	C	1	1	1	1	1	1	38	28	39	44	36	43	1	1	1	1	1	0.97561	1	0.959184	1	1	1	1
23067617	A	G	G	G	G	G	G	1	1	1	1	1	1	24	31	33	46	12	44	1	1	1	1	1	1	1	0.970588	1	0.964286	1	1
74930823	T	C	C	C	C	C	C	1	1	1	1	1	1	32	43	42	40	10	31	1	1	0.970588	1	0.964286	1	1	1	1	1	1	1
18012158	C	A	A	A	A	A	A	1	1	1	1	1	1	21	45	56	35	34	36	1	1	1	0.969697	1	1	1	0.965517	1	1	1	1
41507467	G	C	C	C	C	C	C	1	1	1	1	1	1	91	82	63	108	65	97	1	1	1	1	1	1	1	1	1	1	0.935484	1
51687262	A	G	G	G	G	G	G	1	1	1	1	1	1	109	87	39	63	47	82	1	1	1	1	1	0.935484	1	1	1	1	1	1
106879778	T	C	C	C	C	C	C	1	1	1	1	1	1	78	100	24	84	38	49	1	1	1	1	1	0.935484	1	1	1	1	1	1
64259099	A	G	G	G	G	G	G	1	1	1	1	1	1	30	24	54	45	16	32	0.935484	1	1	1	1	1	1	1	1	1	1	1
43454467	A	G	G	G	G	G	G	1	1	1	1	1	1	30	57	30	18	22	44	1	1	0.974359	1	1	0.961538	1	1	1	1	1	1
19400846	T	C	C	C	C	C	C	1	1	1	1	1	1	45	38	45	48	33	47	0.955556	1	1	1	1	1	1	0.980392	1	1	1	1
32385702	T	C	C	C	C	C	C	1	1	1	1	1	1	40	59	82	99	31	73	1	1	0.93617	1	1	1	1	1	1	1	1	1
37327608	T	C	C	C	C	C	C	1	1	1	1	1	1	79	60	22	77	32	58	1	0.954545	1	0.981818	1	1	1	1	1	1	1	1
68986908	T	C	C	C	C	C	C	1	1	1	1	1	1	165	115	30	142	116	87	0.967742	1	1	1	1	1	1	1	1	0.977528	1	0.992
43828935	G	A	A	A	A	A	A	1	1	1	1	1	1	23	16	20	43	18	19	1	1	1	1	1	1	0.9375	1	1	1	1	1
42176902	A	G	G	G	G	G	G	1	1	1	1	1	1	37	29	15	47	32	16	1	1	1	1	1	1	1	1	1	1	1	0.9375
50515942	G	A	A	A	A	A	A	1	1	1	1	1	1	87	102	52	39	35	108	0.9375	1	1	1	1	1	1	1	1	1	1	1
50515945	G	C	C	C	C	C	C	1	1	1	1	1	1	88	100	52	39	35	108	0.9375	1	1	1	1	1	1	1	1	1	1	1
28566369	C	A	A	A	A	A	A	1	1	1	1	1	1	33	38	37	58	13	20	1	1	1	1	1	1	1	1	1	0.9375	1	1
45778753	T	C	C	C	C	C	C	1	1	1	1	1	1	31	45	20	14	17	32	1	1	1	1	1	1	0.9375	1	1	1	1	1
44410703	T	C	C	C	C	C	C	1	1	1	1	1	1	119	57	54	79	94	99	1	1	1	0.953125	1	1	0.984375	1	1	1	1	1
80489615	C	T	T	T	T	T	T	1	1	1	1	1	1	50	29	25	40	43	40	1	1	1	1	1	1	1	1	1	1	1	0.9375
24796762	C	G	G	G	G	G	G	1	1	1	1	1	1	58	35	12	28	28	14	1	0.9375	1	1	1	1	1	1	1	1	1	1
36364557	T	C	C	C	C	C	C	1	1	1	1	1	1	101	122	112	148	87	124	1	0.961538	0.97619	1	1	1	1	1	1	1	1	1
39929028	T	C	C	C	C	C	C	1	1	1	1	1	1	58	64	96	52	65	35	1	0.986667	0.992032	0.986111	1	1	0.984375	1	1	0.988636	1	1
84414201	A	C	C	C	C	C	C	1	1	1	1	1	1	143	84	48	93	93	101	1	0.991597	0.990826	1	0.988889	0.966667	1	1	1	1	1	1
50317009	A	G	G	G	G	G	G	1	1	1	1	1	1	143	136	65	85	94	178	1	1	1	0.982143	1	1	0.979592	0.976744	1	1	1	1
40176513	A	T	T	T	T	T	T	1	1	1	1	1	1	145	130	16	80	101	126	1	1	1	1	1	0.954545	0.984127	1	1	1	1	1
6448412	A	G	G	G	G	G	G	1	1	1	1	1	1	28	41	16	11	11	23	1	1	0.986301	1	1	1	1	1	0.952381	1	1	1
11884506	A	G	G	G	G	G	G	1	1	1	1	1	1	93	60	36	68	39	40	1	1	1	1	1	1	1	1	1	0.989796	0.963636	0.985714
86620465	T	C	C	C	C	C	C	1	1	1	1	1	1	97	81	62	92	60	116	1	1	1	1	1	1	1	1	0.939394	1	1	1
7036400	T	C	C	C	C	C	C	1	1	1	1	1	1	20	67	18	20	10	16	1	1	1	1	1	1	1	1	1	1	0.939394	1
7036402	T	C	C	C	C	C	C	1	1	1	1	1	1	19	62	17	27	10	16	1	1	1	1	1	1	1	1	1	1	0.939394	1
39619770	A	G	G	G	G	G	G	1	1	1	1	1	1	41	17	33	68	73	47	1	1	1	1	1	1	1	1	1	1	1	0.939394
73263795	A	G	G	G	G	G	G	1	1	1	1	1	1	102	128	242	81	82	100	1	1	0.993846	0.993197	1	1	1	0.987395	0.980198	0.994885	0.989899	1
86767365	A	G	G	G	G	G	G	1	1	1	1	1	1	223	188	65	135	151	77	1	1	1	0.986111	1	1	0.991228	1	1	0.996441	0.975309	0.99061
18208085	T	C	C	C	C	C	C	1	1	1	1	1	1	46	33	36	31	26	26	1	0.954545	0.985714	1	1	1	1	1	1	1	1	1
43706094	T	A	A	A	A	A	A	1	1	1	1	1	1	21	56	17	41	31	20	1	1	1	0.980392	0.96	1	1	1	1	1	1	1
34689804	T	C	C	C	C	C	C	1	1	1	1	1	1	95	178	49	59	64	43	1	1	1	0.989583	1	1	0.982759	0.984375	1	1	0.983871	1
73628521	G	A	A	A	A	A	A	1	1	1	1	1	1	359	331	148	291	207	162	0.981651	1	0.993506	1	1	0.990991	1	0.984962	1	0.99435	1	0.995146
18012132	T	C	C	C	C	C	C	1	1	1	1	1	1	26	49	66	36	33	40	1	1	0.971429	0.985714	1	1	1	0.983607	1	1	1	1
98498191	C	G	G	G	G	G	G	1	1	1	1	1	1	112	108	42	77	83	46	1	1	1	1	0.97619	1	1	1	1	1	0.980392	0.984375
41507459	T	C	C	C	C	C	C	1	1	1	1	1	1	82	71	50	88	52	82	1	1	1	1	1	1	1	1	1	1	0.941176	1
47969676	T	G	G	G	G	G	G	1	1	1	1	1	1	50	20	15	28	18	25	1	1	1	1	1	1	1	1	1	1	0.941176	1
27388157	T	C	C	C	C	C	C	1	1	1	1	1	1	60	48	26	71	52	28	1	1	1	1	1	1	1	1	1	1	0.941176	1
36737974	G	A	A	A	A	A	A	1	1	1	1	1	1	39	16	27	39	10	42	1	1	1	1	0.941176	1	1	1	1	1	1	1
49302254	A	G	G	G	G	G	G	1	1	1	1	1	1	50	29	15	79	36	35	1	1	1	1	1	1	1	1	1	0.941176	1	1
6631185	A	G	G	G	G	G	G	1	1	1	1	1	1	12	12	24	12	10	10	0.941176	1	1	1	1	1	1	1	1	1	1	1
43689966	T	C	C	C	C	C	C	1	1	1	1	1	1	48	42	16	51	16	14	1	1	0.978261	1	1	1	1	1	1	1	0.962963	1
117321604	T	G	G	G	G	G	G	1	1	1	1	1	1	26	24	33	24	15	11	1	1	1	1	1	1	0.967742	0.973684	1	1	1	1
74930822	T	C	C	C	C	C	C	1	1	1	1	1	1	34	49	49	43	10	32	1	1	0.973684	1	0.981818	1	0.986301	1	1	1	1	1
61772550	C	A	A	A	A	A	A	1	1	1	1	1	1	100	77	19	68	42	88	1	1	1	1	1	1	0.957447	1	1	1	1	0.984375
61928641	A	G	G	G	G	G	G	1	1	1	1	1	1	276	286	121	276	157	164	1	1	0.990244	1	1	1	0.985075	1	0.978261	1	0.988372	1
55592188	A	G	G	G	G	G	G	1	1	1	1	1	1	75	62	57	104	90	96	1	1	1	0.982143	1	1	1	1	1	0.96	1	1
37746892	C	T	T	T	T	T	T	1	1	1	1	1	1	59	31	33	43	31	48	1	0.961538	1	0.980769	1	1	1	1	1	1	1	1
142999186	T	C	C	C	C	C	C	1	1	1	1	1	1	142	150	102	79	68	137	1	1	1	1	1	1	1	0.977273	0.965517	1	1	1
27388148	T	C	C	C	C	C	C	1	1	1	1	1	1	63	46	26	63	50	32	1	1	1	1	1	1	1	1	1	1	0.942857	1
50652479	T	C	C	C	C	C	C	1	1	1	1	1	1	71	56	31	38	50	49	1	1	1	0.942857	1	1	1	1	1	1	1	1
36693058	C	T	T	T	T	T	T	1	1	1	1	1	1	18	53	19	19	29	18	1	1	1	1	1	1	0.942857	1	1	1	1	1
41507494	G	A	A	A	A	A	A	1	1	1	1	1	1	125	106	93	124	77	108	1	1	0.991228	1	1	1	1	1	1	1	0.952381	1
114171008	T	C	C	C	C	C	C	1	1	1	1	1	1	23	13	27	33	14	90	1	1	1	1	1	1	1	1	1	0.972222	0.971429	1
36682453	T	A	A	A	A	A	A	1	1	1	1	1	1	122	60	75	145	62	140	0.988636	0.971429	1	0.983871	1	1	1	1	1	1	1	1
43949182	A	G	G	G	G	G	G	1	1	1	1	1	1	48	51	20	38	28	34	1	0.990991	1	1	1	1	1	1	1	0.988024	0.983607	0.981481
49533233	T	G	G	G	G	G	G	1	1	1	1	1	1	73	82	72	93	47	48	1	0.982143	1	1	1	1	0.978723	1	1	0.983333	1	1
38298131	A	G	G	G	G	G	G	1	1	1	1	1	1	54	10	10	27	19	14	1	1	1	1	1	0.944444	1	1	1	1	1	1
45098141	T	G	G	G	G	G	G	1	1	1	1	1	1	68	44	16	40	27	31	1	1	1	1	1	1	1	0.944444	1	1	1	1
14662357	T	C	C	C	C	C	C	1	1	1	1	1	1	41	28	25	48	26	16	1	1	1	1	1	1	1	1	1	1	0.944444	1
142999462	T	C	C	C	C	C	C	1	1	1	1	1	1	137	76	44	62	60	64	1	1	1	1	1	1	1	0.944444	1	1	1	1
32385479	C	T	T	T	T	T	T	1	1	1	1	1	1	21	25	23	33	26	56	1	1	0.944444	1	1	1	1	1	1	1	1	1
44291837	T	C	C	C	C	C	C	1	1	1	1	1	1	139	75	26	68	69	60	1	1	1	1	1	0.944444	1	1	1	1	1	1
24315004	G	A	A	A	A	A	A	1	1	1	1	1	1	80	50	64	55	54	114	0.944444	1	1	1	1	1	1	1	1	1	1	1
72590747	C	T	T	T	T	T	T	1	1	1	1	1	1	53	24	20	38	19	63	1	0.944444	1	1	1	1	1	1	1	1	1	1
116647462	T	C	C	C	C	C	C	1	1	1	1	1	1	36	28	16	23	20	28	1	1	1	1	1	1	1	1	1	1	1	0.944444
11967545	G	A	A	A	A	A	A	1	1	1	1	1	1	52	42	16	36	20	38	1	1	1	1	1	0.944444	1	1	1	1	1	1
65449172	A	G	G	G	G	G	G	1	1	1	1	1	1	18	23	51	30	16	32	0.966102	1	0.978723	1	1	1	1	1	1	1	1	1
100424552	G	A	A	A	A	A	A	1	1	1	1	1	1	131	60	73	118	81	64	1	1	1	1	1	1	1	1	0.976744	0.968504	1	1
13837068	G	T	T	T	T	T	T	1	1	1	1	1	1	86	43	57	49	28	19	1	1	1	0.98	1	1	1	1	1	1	1	0.965517
65648613	T	C	C	C	C	C	C	1	1	1	1	1	1	31	46	16	26	39	27	1	0.974359	0.971429	1	1	1	1	1	1	1	1	1
75902297	T	C	C	C	C	C	C	1	1	1	1	1	1	62	101	77	93	37	78	1	1	1	1	1	1	1	1	1	1	1	0.945946
19400456	T	C	C	C	C	C	C	1	1	1	1	1	1	46	34	67	64	40	21	1	1	1	1	0.945946	1	1	1	1	1	1	1
79296081	A	C	C	C	C	C	C	1	1	1	1	1	1	78	50	33	51	42	69	1	1	1	1	1	1	1	1	1	1	1	0.945946
116646962	G	C	C	C	C	C	C	1	1	1	1	1	1	117	75	38	92	62	108	1	1	1	1	1	1	0.978723	1	1	0.987952	0.990291	0.989011
12231325	T	C	C	C	C	C	C	1	1	1	1	1	1	156	217	240	203	64	115	1	1	1	1	1	0.992126	1	0.975207	0.987654	0.990991	1	1
18474736	T	C	C	C	C	C	C	1	1	1	1	1	1	193	108	59	168	115	159	1	1	1	0.989691	1	0.971429	0.985915	1	1	1	1	1
40176856	A	G	G	G	G	G	G	1	1	1	1	1	1	70	60	35	50	53	89	1	1	1	0.985507	1	0.961538	1	1	1	1	1	1
41507605	A	G	G	G	G	G	G	1	1	1	1	1	1	118	145	121	160	121	120	1	1	1	1	1	0.986395	1	0.992248	1	1	0.981132	0.987342
77247658	T	A	A	A	A	A	A	1	1	1	1	1	1	72	36	47	56	37	41	0.947368	1	1	1	1	1	1	1	1	1	1	1
49639087	C	A	A	A	A	A	A	1	1	1	1	1	1	21	19	24	24	10	35	1	1	0.947368	1	1	1	1	1	1	1	1	1
119489362	G	A	A	A	A	A	A	1	1	1	1	1	1	48	61	20	22	23	13	1	0.947368	1	1	1	1	1	1	1	1	1	1
121142059	G	A	A	A	A	A	A	1	1	1	1	1	1	59	48	26	69	24	85	1	1	1	1	1	1	1	1	1	1	0.947368	1
65449194	T	C	C	C	C	C	C	1	1	1	1	1	1	14	21	33	22	10	26	1	1	0.947368	1	1	1	1	1	1	1	1	1
97127338	T	C	C	C	C	C	C	1	1	1	1	1	1	14	18	26	40	21	30	1	1	1	1	1	1	1	1	1	1	0.947368	1
23837848	T	C	C	C	C	C	C	1	1	1	1	1	1	31	40	26	26	53	41	1	1	1	0.947368	1	1	1	1	1	1	1	1
4755167	T	C	C	C	C	C	C	1	1	1	1	1	1	68	28	66	90	21	35	1	0.967742	1	0.990476	1	1	1	0.989247	1	1	1	1
30384232	A	G	G	G	G	G	G	1	1	1	1	1	1	77	108	46	95	71	46	1	0.97561	1	1	1	1	0.972222	1	1	1	1	1
111053563	G	A	A	A	A	A	A	1	1	1	1	1	1	106	88	30	101	67	58	1	0.983051	1	0.984848	1	0.98	1	1	1	1	1	1
43935835	A	G	G	G	G	G	G	1	1	1	1	1	1	245	198	143	269	134	252	0.948052	1	1	1	1	1	1	1	1	1	1	1
50317039	C	T	T	T	T	T	T	1	1	1	1	1	1	125	104	40	64	65	143	1	1	0.989796	0.975309	1	1	1	0.983051	1	1	1	1
34689783	A	G	G	G	G	G	G	1	1	1	1	1	1	142	300	84	93	88	79	1	1	1	0.993197	1	1	0.988235	0.990099	1	0.985075	0.991667	1
11884511	T	C	C	C	C	C	C	1	1	1	1	1	1	97	61	38	69	40	40	1	1	1	1	1	1	1	1	1	1	0.962264	0.986111
59429183	T	C	C	C	C	C	C	1	1	1	1	1	1	50	40	21	20	40	22	1	1	1	1	1	1	0.984375	1	1	1	0.964286	1
23067710	T	C	C	C	C	C	C	1	1	1	1	1	1	28	49	31	51	18	90	1	1	1	1	1	1	1	0.948718	1	1	1	1
2411546	A	G	G	G	G	G	G	1	1	1	1	1	1	53	36	24	37	14	15	1	1	1	1	1	1	1	1	1	0.948718	1	1
12266070	T	C	C	C	C	C	C	1	1	1	1	1	1	71	50	40	85	49	45	1	0.948718	1	1	1	1	1	1	1	1	1	1
61556491	T	C	C	C	C	C	C	1	1	1	1	1	1	181	160	102	159	103	164	1	1	1	1	1	1	1	0.980392	0.96875	1	1	1
23734178	T	C	C	C	C	C	C	1	1	1	1	1	1	72	71	22	68	30	186	1	1	0.977778	0.971831	1	1	1	1	1	1	1	1
43706428	T	C	C	C	C	C	C	1	1	1	1	1	1	59	80	51	60	27	58	1	1	0.988235	1	1	1	1	1	1	1	0.961538	1
9822941	A	G	G	G	G	G	G	1	1	1	1	1	1	109	80	16	41	56	52	0.974684	1	1	1	1	1	1	1	1	1	0.975309	1
102964844	T	C	C	C	C	C	C	1	1	1	1	1	1	56	40	26	40	16	10	1	1	1	1	1	1	1	1	1	0.95	1	1
7037019	T	G	G	G	G	G	G	1	1	1	1	1	1	22	44	18	36	21	29	1	1	1	1	1	1	1	1	1	0.95	1	1
22671497	A	G	G	G	G	G	G	1	1	1	1	1	1	103	110	66	123	59	79	1	1	1	1	1	1	1	1	1	0.98	1	0.970149
57016351	C	T	T	T	T	T	T	1	1	1	1	1	1	148	168	40	84	71	43	1	1	0.995984	0.989796	1	0.982301	1	1	1	0.991803	1	0.990566
62543973	T	C	C	C	C	C	C	1	1	1	1	1	1	74	113	39	61	46	71	1	1	1	0.977528	1	1	1	1	1	1	1	0.972973
474146	T	C	C	C	C	C	C	1	1	1	1	1	1	59	66	38	51	31	71	1	0.982379	1	0.986577	1	1	1	1	1	1	0.987805	0.993902
19400477	G	A	A	A	A	A	A	1	1	1	1	1	1	48	40	65	65	45	19	1	1	1	1	0.95122	1	1	1	1	1	1	1
35191368	T	C	C	C	C	C	C	1	1	1	1	1	1	26	25	48	46	28	40	1	1	1	1	0.95122	1	1	1	1	1	1	1
117321543	T	C	C	C	C	C	C	1	1	1	1	1	1	31	31	40	24	21	16	1	1	1	1	1	1	1	1	1	0.95122	1	1
122170065	T	C	C	C	C	C	C	1	1	1	1	1	1	21	37	29	26	18	10	1	0.95122	1	1	1	1	1	1	1	1	1	1
38537633	T	C	C	C	C	C	C	1	1	1	1	1	1	112	93	52	72	67	108	1	1	1	0.970297	1	1	1	1	1	0.981132	1	1
50574609	G	A	A	A	A	A	A	1	1	1	1	1	1	33	36	11	33	19	16	0.969697	1	1	1	1	1	1	1	1	1	1	0.981818
16278754	T	G	G	G	G	G	G	1	1	1	1	1	1	55	24	20	56	10	11	1	1	1	0.965517	1	1	1	1	1	1	1	0.986842
116647450	T	C	C	C	C	C	C	1	1	1	1	1	1	32	29	20	31	23	28	1	1	1	1	1	1	1	1	1	1	1	0.952381
127719841	A	C	C	C	C	C	C	1	1	1	1	1	1	62	55	23	21	43	26	1	1	1	1	0.952381	1	1	1	1	1	1	1
76949044	C	T	T	T	T	T	T	1	1	1	1	1	1	87	69	31	22	39	55	1	1	1	1	0.952381	1	1	1	1	1	1	1
15331337	A	G	G	G	G	G	G	1	1	1	1	1	1	105	69	43	37	46	49	1	1	1	1	1	1	1	1	1	1	1	0.952381
140578655	A	G	G	G	G	G	G	1	1	1	1	1	1	43	88	16	88	33	45	1	1	1	1	1	1	1	1	0.952381	1	1	1
142999313	A	G	G	G	G	G	G	1	1	1	1	1	1	106	87	53	37	36	54	0.952381	1	1	1	1	1	1	1	1	1	1	1
88995803	G	T	T	T	T	T	T	1	1	1	1	1	1	32	26	16	39	41	156	1	1	1	1	1	1	0.952381	1	1	1	1	1
89220046	A	G	G	G	G	G	G	1	1	1	1	1	1	43	90	14	25	17	15	1	1	1	0.952381	1	1	1	1	1	1	1	1
44410619	T	C	C	C	C	C	C	1	1	1	1	1	1	136	72	68	97	108	109	1	1	1	0.953125	1	1	1	1	1	1	1	1
20297677	A	T	T	T	T	T	T	1	1	1	1	1	1	53	19	34	51	40	49	1	1	0.985714	1	0.967742	1	1	1	1	1	1	1
38269688	T	C	C	C	C	C	C	1	1	1	1	1	1	24	47	29	45	31	45	1	1	1	1	1	1	0.953488	1	1	1	1	1
16461601	A	C	C	C	C	C	C	1	1	1	1	1	1	224	134	94	182	107	131	1	1	1	0.993631	1	1	1	1	0.96	1	1	1
98497834	T	C	C	C	C	C	C	1	1	1	1	1	1	189	148	42	125	105	43	1	1	1	1	1	1	0.986111	1	1	1	0.967742	1
17610038	T	C	C	C	C	C	C	1	1	1	1	1	1	128	112	104	168	73	172	1	1	1	1	1	1	1	1	1	0.984848	1	0.969231
89220946	A	G	G	G	G	G	G	1	1	1	1	1	1	196	330	104	204	106	79	1	0.984733	0.987654	1	0.986667	1	1	0.995098	1	1	1	1
28433132	A	C	C	C	C	C	C	1	1	1	1	1	1	38	20	16	31	28	28	1	1	1	1	1	1	1	0.974359	1	1	1	0.98
43782041	A	C	C	C	C	C	C	1	1	1	1	1	1	33	15	20	15	18	12	1	1	1	1	0.954545	1	1	1	1	1	1	1
36365673	C	T	T	T	T	T	T	1	1	1	1	1	1	52	41	20	50	42	64	1	1	1	1	0.954545	1	1	1	1	1	1	1
49639101	G	A	A	A	A	A	A	1	1	1	1	1	1	21	21	23	23	10	38	1	1	0.954545	1	1	1	1	1	1	1	1	1
37284695	C	T	T	T	T	T	T	1	1	1	1	1	1	70	74	47	91	34	57	1	1	1	1	0.954545	1	1	1	1	1	1	1
40215388	A	C	C	C	C	C	C	1	1	1	1	1	1	128	111	41	157	94	77	1	0.954545	1	1	1	1	1	1	1	1	1	1
120278963	A	G	G	G	G	G	G	1	1	1	1	1	1	32	43	32	22	25	28	1	1	1	1	1	1	1	0.954545	1	1	1	1
86766931	C	T	T	T	T	T	T	1	1	1	1	1	1	36	22	13	36	31	23	1	1	1	1	1	1	1	1	1	1	1	0.954545
114343386	G	A	A	A	A	A	A	1	1	1	1	1	1	29	37	17	34	18	31	1	1	1	1	1	1	1	1	1	1	0.954545	1
12265204	A	G	G	G	G	G	G	1	1	1	1	1	1	213	196	51	150	91	248	1	1	1	1	1	1	0.954545	1	1	1	1	1
44410611	T	C	C	C	C	C	C	1	1	1	1	1	1	132	70	63	96	107	108	1	1	1	0.954545	1	1	1	1	1	1	1	1
97127315	C	A	A	A	A	A	A	1	1	1	1	1	1	34	33	36	57	27	43	1	1	1	1	1	1	1	1	1	1	0.954545	1
74454143	G	A	A	A	A	A	A	1	1	1	1	1	1	32	15	17	29	39	37	1	1	1	0.954545	1	1	1	1	1	1	1	1
74454146	G	T	T	T	T	T	T	1	1	1	1	1	1	31	14	17	28	38	36	1	1	1	0.954545	1	1	1	1	1	1	1	1
6156325	A	G	G	G	G	G	G	1	1	1	1	1	1	445	336	146	239	260	222	1	0.985612	1	0.992032	1	1	1	1	0.977011	1	1	1
104147265	T	C	C	C	C	C	C	1	1	1	1	1	1	345	127	27	273	147	101	1	1	0.995238	0.986014	1	1	1	1	1	0.973684	1	1
114343539	G	A	A	A	A	A	A	1	1	1	1	1	1	97	84	48	96	41	88	1	0.98	0.989691	1	1	1	1	1	1	1	0.985294	1
74454000	G	A	A	A	A	A	A	1	1	1	1	1	1	41	41	22	48	65	68	1	1	0.977011	1	0.978261	1	1	1	1	1	1	1
63915266	C	T	T	T	T	T	T	1	1	1	1	1	1	17	49	43	12	19	34	1	1	1	1	1	1	1	0.973333	1	1	0.982143	1
43949312	G	A	A	A	A	A	A	1	1	1	1	1	1	41	29	42	37	23	28	1	1	1	1	1	1	1	1	1	1	1	0.955556
6707304	C	T	T	T	T	T	T	1	1	1	1	1	1	32	53	22	28	16	36	1	1	1	1	1	0.955556	1	1	1	1	1	1
35786256	T	C	C	C	C	C	C	1	1	1	1	1	1	72	44	17	49	25	104	1	1	1	0.955556	1	1	1	1	1	1	1	1
55265628	T	C	C	C	C	C	C	1	1	1	1	1	1	58	53	29	60	40	50	1	1	1	1	1	0.955556	1	1	1	1	1	1
142999161	C	G	G	G	G	G	G	1	1	1	1	1	1	76	86	51	56	24	101	1	1	1	1	1	1	1	0.955556	1	1	1	1
56106378	A	G	G	G	G	G	G	1	1	1	1	1	1	34	31	31	33	21	10	1	1	1	0.955556	1	1	1	1	1	1	1	1
57903677	T	C	C	C	C	C	C	1	1	1	1	1	1	96	114	74	103	43	83	1	1	1	0.986928	0.985915	1	1	0.982759	1	1	1	1
9377524	T	G	G	G	G	G	G	1	1	1	1	1	1	160	227	80	186	118	100	1	1	0.97479	1	0.988235	1	1	1	1	0.996109	0.996599	1
43744062	A	G	G	G	G	G	G	1	1	1	1	1	1	231	117	67	122	110	138	1	1	1	0.988764	1	1	1	0.967742	1	1	1	1
14428704	T	C	C	C	C	C	C	1	1	1	1	1	1	31	37	11	24	13	29	1	1	1	1	1	1	1	1	1	0.956522	1	1
40611695	T	C	C	C	C	C	C	1	1	1	1	1	1	29	42	27	35	32	55	1	1	1	1	1	0.956522	1	1	1	1	1	1
5015146	A	G	G	G	G	G	G	1	1	1	1	1	1	55	34	21	38	51	56	1	1	1	1	1	1	0.956522	1	1	1	1	1
96254305	T	C	C	C	C	C	C	1	1	1	1	1	1	18	23	31	20	11	29	1	1	1	1	1	1	1	1	1	1	1	0.956522
96254310	T	A	A	A	A	A	A	1	1	1	1	1	1	18	23	31	20	11	27	1	1	1	1	1	1	1	1	1	1	1	0.956522
86766953	A	G	G	G	G	G	G	1	1	1	1	1	1	39	25	14	38	39	28	1	1	1	1	1	1	1	1	1	1	1	0.956522
26529688	A	G	G	G	G	G	G	1	1	1	1	1	1	74	79	68	56	54	41	1	1	1	1	1	1	1	0.956522	1	1	1	1
72705745	C	T	T	T	T	T	T	1	1	1	1	1	1	40	36	25	42	14	12	1	1	1	1	1	1	1	0.956522	1	1	1	1
87375585	T	C	C	C	C	C	C	1	1	1	1	1	1	90	53	55	81	42	85	1	1	1	1	1	1	1	1	0.956522	1	1	1
97127217	C	T	T	T	T	T	T	1	1	1	1	1	1	53	47	39	86	40	61	1	1	1	1	1	1	1	1	1	1	0.956522	1
97127309	T	C	C	C	C	C	C	1	1	1	1	1	1	35	36	37	61	27	41	1	1	1	1	1	1	1	1	1	1	0.956522	1
104337106	G	C	C	C	C	C	C	1	1	1	1	1	1	54	18	22	32	16	11	1	1	1	1	1	1	1	1	1	1	1	0.956522
11968041	G	A	A	A	A	A	A	1	1	1	1	1	1	38	23	14	28	17	30	1	1	0.956522	1	1	1	1	1	1	1	1	1
11884639	G	A	A	A	A	A	A	1	1	1	1	1	1	147	152	63	138	79	86	1	0.975	1	1	1	1	1	1	1	1	1	0.982456
89220398	A	G	G	G	G	G	G	1	1	1	1	1	1	207	288	89	227	117	75	0.977778	1	1	1	1	0.986014	1	1	1	1	0.994012	1
73628541	T	C	C	C	C	C	C	1	1	1	1	1	1	335	272	124	265	177	137	1	1	1	1	0.993151	0.990196	1	0.983333	1	0.993902	1	0.99726
74453696	T	G	G	G	G	G	G	1	1	1	1	1	1	45	31	14	46	40	62	1	1	0.987654	1	1	1	0.970588	1	1	1	1	1
43948946	A	G	G	G	G	G	G	1	1	1	1	1	1	20	11	14	23	23	17	1	1	1	1	1	1	1	0.958333	1	1	1	1
40611760	A	G	G	G	G	G	G	1	1	1	1	1	1	36	55	24	28	37	56	1	1	1	1	1	0.958333	1	1	1	1	1	1
40611762	G	A	A	A	A	A	A	1	1	1	1	1	1	35	56	24	28	36	54	1	1	1	1	1	0.958333	1	1	1	1	1	1
5818117	A	G	G	G	G	G	G	1	1	1	1	1	1	22	28	30	35	43	88	1	1	1	1	1	1	1	0.958333	1	1	1	1
49639104	G	C	C	C	C	C	C	1	1	1	1	1	1	23	21	27	23	11	37	1	1	0.958333	1	1	1	1	1	1	1	1	1
7036544	T	C	C	C	C	C	C	1	1	1	1	1	1	16	44	13	24	20	23	1	1	1	1	1	1	1	1	1	1	1	0.958333
72590065	T	C	C	C	C	C	C	1	1	1	1	1	1	29	34	15	30	25	52	1	1	1	1	1	1	1	1	1	1	1	0.958333
52146912	A	G	G	G	G	G	G	1	1	1	1	1	1	23	31	24	12	10	20	1	1	1	1	1	1	0.958333	1	1	1	1	1
97127288	A	G	G	G	G	G	G	1	1	1	1	1	1	41	39	41	66	34	53	1	1	1	1	1	1	1	1	1	1	0.958333	1
116647260	T	C	C	C	C	C	C	1	1	1	1	1	1	61	58	47	88	47	77	1	1	1	1	1	1	1	0.972222	1	1	1	0.986301
116647057	T	C	C	C	C	C	C	1	1	1	1	1	1	107	74	48	96	52	104	1	1	0.976744	1	1	1	0.981818	1	1	1	1	1
42546238	A	G	G	G	G	G	G	1	1	1	1	1	1	108	86	29	34	72	95	1	1	0.983333	1	1	1	1	1	1	1	1	0.975309
56443806	T	G	G	G	G	G	G	1	1	1	1	1	1	121	55	26	92	54	35	1	1	1	1	1	0.980392	1	0.978261	1	1	1	1
43949244	T	C	C	C	C	C	C	1	1	1	1	1	1	86	93	77	66	58	78	1	1	1	1	1	1	0.978261	1	1	0.996795	1	0.983607
73628255	T	C	C	C	C	C	C	1	1	1	1	1	1	206	251	122	212	117	159	0.988024	1	0.992537	1	1	1	0.99505	1	0.985714	1	1	0.997449
104146707	T	C	C	C	C	C	C	1	1	1	1	1	1	271	274	45	190	129	113	1	0.967033	1	1	1	1	1	1	1	0.99187	1	1
273031	A	C	C	C	C	C	C	1	1	1	1	1	1	79	50	23	81	54	59	1	1	0.98	1	1	1	1	1	1	1	1	0.979167
119488496	T	C	C	C	C	C	C	1	1	1	1	1	1	103	44	13	55	51	28	1	1	0.959184	1	1	1	1	1	1	1	1	1
4755520	T	G	G	G	G	G	G	1	1	1	1	1	1	58	23	43	48	13	52	1	1	0.970588	1	1	1	1	1	1	1	1	0.988636
7526252	A	G	G	G	G	G	G	1	1	1	1	1	1	111	102	67	159	82	95	1	1	1	0.988764	1	0.986301	1	0.984375	1	1	1	1
40176914	T	C	C	C	C	C	C	1	1	1	1	1	1	66	57	33	43	50	82	1	1	1	0.959459	1	1	1	1	1	1	1	1
34689791	G	A	A	A	A	A	A	1	1	1	1	1	1	130	278	71	88	89	73	1	1	1	0.992248	1	1	0.987342	0.989899	1	1	0.990476	1
70683734	G	A	A	A	A	A	A	1	1	1	1	1	1	25	17	16	23	38	19	1	1	1	1	1	0.96	1	1	1	1	1	1
74497725	G	A	A	A	A	A	A	1	1	1	1	1	1	38	49	19	60	39	85	1	1	1	1	0.96	1	1	1	1	1	1	1
74425376	C	A	A	A	A	A	A	1	1	1	1	1	1	35	64	18	46	23	24	1	0.96	1	1	1	1	1	1	1	1	1	1
59705880	A	G	G	G	G	G	G	1	1	1	1	1	1	34	23	22	43	14	19	1	1	1	1	1	1	1	0.96	1	1	1	1
44525959	G	A	A	A	A	A	A	1	1	1	1	1	1	100	174	96	161	50	64	1	1	0.96	1	1	1	1	1	1	1	1	1
7037053	T	C	C	C	C	C	C	1	1	1	1	1	1	13	41	11	27	16	25	1	1	1	1	1	1	1	1	1	1	1	0.96
96254199	A	G	G	G	G	G	G	1	1	1	1	1	1	29	28	27	23	14	24	1	1	1	1	1	1	1	1	1	1	1	0.96
36546947	A	G	G	G	G	G	G	1	1	1	1	1	1	167	155	57	149	109	162	1	1	1	1	1	1	1	1	0.96	1	1	1
59429190	G	A	A	A	A	A	A	1	1	1	1	1	1	60	52	22	26	50	24	1	1	1	1	0.96	1	1	1	1	1	1	1
41399075	T	C	C	C	C	C	C	1	1	1	1	1	1	83	79	27	71	44	24	1	1	1	0.987805	1	0.972222	1	1	1	1	1	1
119489394	A	G	G	G	G	G	G	1	1	1	1	1	1	81	98	34	36	42	23	1	1	0.988372	1	1	1	1	1	1	0.971831	1	1
86766987	C	T	T	T	T	T	T	1	1	1	1	1	1	69	46	13	46	59	45	1	1	0.981132	1	1	1	1	1	1	1	0.979167	1
75499763	G	C	C	C	C	C	C	1	1	1	1	1	1	42	42	37	42	13	57	1	1	1	1	1	1	1	1	1	1	1	0.960784
55265471	T	C	C	C	C	C	C	1	1	1	1	1	1	119	110	83	189	109	116	1	1	1	1	1	1	1	0.960784	1	1	1	1
64586988	A	G	G	G	G	G	G	1	1	1	1	1	1	143	119	82	165	85	120	1	1	1	1	1	1	1	0.980392	1	1	1	0.980392
130066888	G	A	A	A	A	A	A	1	1	1	1	1	1	130	115	44	112	53	120	1	1	1	1	1	1	1	1	1	0.960784	1	1
24856443	A	T	T	T	T	T	T	1	1	1	1	1	1	180	93	81	159	108	91	0.992	1	0.994792	1	1	1	0.993151	1	0.993421	0.994819	0.993007	1
11884526	T	A	A	A	A	A	A	1	1	1	1	1	1	101	67	35	81	42	42	1	1	0.991597	1	1	1	1	1	1	1	0.982759	0.986842
35837161	G	A	A	A	A	A	A	1	1	1	1	1	1	290	147	135	362	183	354	1	1	1	1	1	1	1	0.985915	1	1	0.97561	1
56969023	A	G	G	G	G	G	G	1	1	1	1	1	1	19	45	12	44	10	34	0.961538	1	1	1	1	1	1	1	1	1	1	1
6355883	A	T	T	T	T	T	T	1	1	1	1	1	1	53	20	13	33	30	25	1	1	1	1	1	1	1	0.961538	1	1	1	1
32385379	C	T	T	T	T	T	T	1	1	1	1	1	1	22	26	13	34	24	52	1	1	1	1	1	1	1	1	1	1	0.961538	1
49639167	G	T	T	T	T	T	T	1	1	1	1	1	1	28	22	30	30	13	49	1	1	0.961538	1	1	1	1	1	1	1	1	1
18145604	T	C	C	C	C	C	C	1	1	1	1	1	1	47	23	20	47	32	42	1	1	1	1	1	1	1	1	1	1	1	0.961538
2767377	A	G	G	G	G	G	G	1	1	1	1	1	1	29	44	10	21	31	32	1	1	1	1	1	1	1	1	1	1	0.961538	1
3373745	T	C	C	C	C	C	C	1	1	1	1	1	1	53	50	13	58	10	21	1	1	0.961538	1	1	1	1	1	1	1	1	1
14576672	A	T	T	T	T	T	T	1	1	1	1	1	1	17	15	24	65	10	20	1	1	1	0.961538	1	1	1	1	1	1	1	1
272281	T	C	C	C	C	C	C	1	1	1	1	1	1	39	29	19	35	33	13	1	1	0.961538	1	1	1	1	1	1	1	1	1
55592409	T	C	C	C	C	C	C	1	1	1	1	1	1	107	92	57	94	61	72	1	1	1	1	1	1	1	1	1	0.985915	1	0.975904
101020859	A	C	C	C	C	C	C	1	1	1	1	1	1	89	116	96	191	105	205	0.988372	1	1	1	1	1	0.973684	1	1	1	1	1
49333039	T	G	G	G	G	G	G	1	1	1	1	1	1	121	51	29	50	44	33	0.993506	1	0.985915	1	1	1	0.982759	1	1	1	1	1
7526348	A	G	G	G	G	G	G	1	1	1	1	1	1	223	214	80	226	163	159	1	1	1	1	1	1	1	1	0.962264	1	1	1
72504072	G	A	A	A	A	A	A	1	1	1	1	1	1	84	74	32	93	45	67	1	1	1	0.962264	1	1	1	1	1	1	1	1
27388484	T	G	G	G	G	G	G	1	1	1	1	1	1	124	97	32	61	92	84	1	1	1	0.985075	1	1	1	1	1	1	1	0.977273
103232955	A	G	G	G	G	G	G	1	1	1	1	1	1	73	96	38	71	48	49	1	1	1	1	1	1	1	1	1	1	0.977778	0.984848
27972768	G	A	A	A	A	A	A	1	1	1	1	1	1	66	84	162	43	16	48	1	1	0.986667	1	1	1	0.984848	1	1	1	1	0.991304
28433163	A	C	C	C	C	C	C	1	1	1	1	1	1	44	41	19	36	30	35	1	1	1	0.981818	1	1	1	0.981132	1	1	1	1
55592032	A	G	G	G	G	G	G	1	1	1	1	1	1	47	44	26	32	31	77	1	1	1	1	1	1	1	1	1	1	0.962963	1
23067761	T	C	C	C	C	C	C	1	1	1	1	1	1	31	57	27	38	20	72	1	1	1	1	1	1	1	0.962963	1	1	1	1
17609521	C	T	T	T	T	T	T	1	1	1	1	1	1	42	34	28	65	27	38	1	1	1	1	1	1	1	1	1	0.962963	1	1
7526342	A	G	G	G	G	G	G	1	1	1	1	1	1	216	208	72	217	153	149	1	1	1	1	1	1	1	1	0.962963	1	1	1
578810	A	C	C	C	C	C	C	1	1	1	1	1	1	15	20	32	23	34	23	1	1	1	1	1	1	1	1	1	1	1	0.962963
2631220	A	G	G	G	G	G	G	1	1	1	1	1	1	53	62	18	36	39	65	1	0.962963	1	1	1	1	1	1	1	1	1	1
2631365	G	A	A	A	A	A	A	1	1	1	1	1	1	38	65	12	47	24	44	1	1	1	1	1	1	1	1	1	1	1	0.962963
9823140	A	G	G	G	G	G	G	1	1	1	1	1	1	60	106	22	44	57	90	1	1	1	1	1	1	1	0.962963	1	1	1	1
24796597	T	G	G	G	G	G	G	1	1	1	1	1	1	53	19	11	33	37	16	1	0.962963	1	1	1	1	1	1	1	1	1	1
57517190	G	A	A	A	A	A	A	1	1	1	1	1	1	70	24	10	50	22	22	1	1	1	0.962963	1	1	1	1	1	1	1	1
41507577	C	A	A	A	A	A	A	1	1	1	1	1	1	157	180	150	201	139	162	0.996575	1	1	1	1	0.989362	1	1	1	1	0.986577	0.99061
57121868	T	C	C	C	C	C	C	1	1	1	1	1	1	258	172	86	232	143	195	1	1	1	1	1	1	0.990654	0.986842	1	1	1	0.985915
36364678	T	C	C	C	C	C	C	1	1	1	1	1	1	104	87	63	100	61	102	1	1	1	1	1	1	1	1	1	1	1	0.963636
142999374	C	T	T	T	T	T	T	1	1	1	1	1	1	153	91	60	73	71	84	1	1	1	1	1	0.963636	1	1	1	1	1	1
120278900	T	C	C	C	C	C	C	1	1	1	1	1	1	53	59	46	35	36	45	1	0.963636	1	1	1	1	1	1	1	1	1	1
105590815	T	C	C	C	C	C	C	1	1	1	1	1	1	283	231	122	149	168	305	1	1	1	1	1	1	1	0.997024	0.966667	1	1	1
35836762	G	A	A	A	A	A	A	1	1	1	1	1	1	299	303	321	331	308	435	1	1	1	0.995575	1	1	1	1	0.991667	1	0.987952	0.988764
77913687	C	T	T	T	T	T	T	1	1	1	1	1	1	129	89	67	175	116	293	1	1	1	0.980769	1	1	0.983193	1	1	1	1	1
74118118	T	C	C	C	C	C	C	1	1	1	1	1	1	131	100	48	183	92	47	0.991803	1	1	1	1	1	1	0.972222	1	1	1	1
32445238	A	G	G	G	G	G	G	1	1	1	1	1	1	59	65	48	33	24	62	1	1	0.964286	1	1	1	1	1	1	1	1	1
59706650	T	C	C	C	C	C	C	1	1	1	1	1	1	99	86	46	78	27	39	1	1	1	1	1	1	1	1	0.964286	1	1	1
50652053	C	T	T	T	T	T	T	1	1	1	1	1	1	98	45	30	85	63	64	1	1	1	1	1	1	1	1	0.964286	1	1	1
49639115	G	A	A	A	A	A	A	1	1	1	1	1	1	24	19	32	23	11	45	1	1	0.964286	1	1	1	1	1	1	1	1	1
84663565	T	A	A	A	A	A	A	1	1	1	1	1	1	157	145	31	149	99	54	1	1	0.990196	1	1	0.987654	1	1	1	1	1	0.986486
35837152	G	A	A	A	A	A	A	1	1	1	1	1	1	305	143	158	376	192	357	1	1	1	1	1	1	1	0.987013	1	1	0.977778	1
35515391	T	C	C	C	C	C	C	1	1	1	1	1	1	86	79	59	103	35	41	1	1	0.964912	1	1	1	1	1	1	1	1	1
39619786	A	G	G	G	G	G	G	1	1	1	1	1	1	57	48	51	87	94	62	1	1	1	1	1	1	1	1	1	1	1	0.964912
18208120	G	T	T	T	T	T	T	1	1	1	1	1	1	70	56	42	40	35	32	1	1	0.965116	1	1	1	1	1	1	1	1	1
18208149	T	C	C	C	C	C	C	1	1	1	1	1	1	69	58	33	39	36	26	1	1	0.974684	0.990476	1	1	1	1	1	1	1	1
36758388	A	G	G	G	G	G	G	1	1	1	1	1	1	59	48	32	75	44	12	1	1	1	1	1	1	1	1	1	0.965517	1	1
61556458	A	G	G	G	G	G	G	1	1	1	1	1	1	129	89	50	93	64	96	1	0.965517	1	1	1	1	1	1	1	1	1	1
61537151	T	C	C	C	C	C	C	1	1	1	1	1	1	31	25	25	30	10	12	0.965517	1	1	1	1	1	1	1	1	1	1	1
28834397	A	G	G	G	G	G	G	1	1	1	1	1	1	170	88	116	100	57	108	1	0.965517	1	1	1	1	1	1	1	1	1	1
7037017	T	C	C	C	C	C	C	1	1	1	1	1	1	23	45	18	37	25	32	1	1	1	1	1	1	1	1	0.965517	1	1	1
101274174	T	G	G	G	G	G	G	1	1	1	1	1	1	35	39	21	48	19	21	1	1	1	0.965517	1	1	1	1	1	1	1	1
103232812	T	G	G	G	G	G	G	1	1	1	1	1	1	29	35	23	36	41	26	1	1	1	1	1	1	1	1	1	1	1	0.965517
474227	T	C	C	C	C	C	C	1	1	1	1	1	1	152	247	153	109	106	277	0.980861	1	0.9975	1	1	1	0.990148	0.997097	1	1	1	1
35786567	A	G	G	G	G	G	G	1	1	1	1	1	1	57	61	60	80	34	62	1	1	1	1	0.966102	1	1	1	1	1	1	1
76949126	A	G	G	G	G	G	G	1	1	1	1	1	1	159	107	60	41	71	57	1	1	1	1	0.966102	1	1	1	1	1	1	1
77895780	A	G	G	G	G	G	G	1	1	1	1	1	1	438	201	187	509	190	257	0.973333	1	1	1	1	1	1	1	0.992806	1	1	1
116647169	A	G	G	G	G	G	G	1	1	1	1	1	1	92	62	33	71	68	109	1	1	1	1	0.985714	1	1	0.980769	1	1	1	1
19882117	A	G	G	G	G	G	G	1	1	1	1	1	1	45	31	11	10	12	14	1	1	0.966667	1	1	1	1	1	1	1	1	1
36365488	T	C	C	C	C	C	C	1	1	1	1	1	1	153	97	60	129	61	133	1	1	1	1	1	1	1	1	1	1	0.966667	1
53095817	A	G	G	G	G	G	G	1	1	1	1	1	1	208	169	60	134	126	42	1	1	1	1	1	1	1	1	0.974359	1	1	0.992308
35786598	C	G	G	G	G	G	G	1	1	1	1	1	1	44	66	51	71	33	51	1	1	1	1	0.966667	1	1	1	1	1	1	1
69620700	A	C	C	C	C	C	C	1	1	1	1	1	1	46	61	72	38	40	83	1	1	1	1	1	1	1	1	1	1	0.966667	1
28495234	A	G	G	G	G	G	G	1	1	1	1	1	1	116	139	32	92	32	29	1	1	1	1	1	1	1	1	1	1	1	0.966667
49302460	A	G	G	G	G	G	G	1	1	1	1	1	1	116	68	38	118	66	114	1	1	1	1	1	1	0.966667	1	1	1	1	1
39619758	T	C	C	C	C	C	C	1	1	1	1	1	1	50	15	33	61	75	53	1	1	1	1	1	1	1	1	1	1	1	0.966667
91215032	A	G	G	G	G	G	G	1	1	1	1	1	1	56	81	41	36	38	73	1	1	1	0.974684	1	1	1	1	1	1	0.992308	1
74454008	A	G	G	G	G	G	G	1	1	1	1	1	1	50	46	26	51	73	78	0.977778	1	0.989247	1	1	1	1	1	1	1	1	1
55265080	G	A	A	A	A	A	A	1	1	1	1	1	1	178	176	96	171	108	179	1	1	1	1	1	1	1	0.987654	1	1	0.979381	1
75235505	T	C	C	C	C	C	C	1	1	1	1	1	1	77	98	25	51	32	82	1	1	0.987179	1	1	1	1	1	0.98	1	1	1
104741192	C	A	A	A	A	A	A	1	1	1	1	1	1	68	66	72	83	34	22	1	1	0.967213	1	1	1	1	1	1	1	1	1
64587024	G	A	A	A	A	A	A	1	1	1	1	1	1	189	154	143	230	113	152	1	1	1	1	0.992424	1	1	0.987805	1	1	1	0.987013
79570628	C	A	A	A	A	A	A	1	1	1	1	1	1	198	106	164	211	79	198	1	1	1	1	1	1	1	0.983051	1	1	1	0.984252
54707531	A	G	G	G	G	G	G	1	1	1	1	1	1	132	194	92	147	117	124	1	1	1	1	1	0.986486	1	1	1	0.980952	1	1
53096063	T	C	C	C	C	C	C	1	1	1	1	1	1	90	48	14	53	38	21	0.967742	1	1	1	1	1	1	1	1	1	1	1
59366055	T	C	C	C	C	C	C	1	1	1	1	1	1	52	47	15	38	21	42	1	1	1	1	1	1	0.967742	1	1	1	1	1
113594974	T	C	C	C	C	C	C	1	1	1	1	1	1	76	43	36	72	62	54	1	0.967742	1	1	1	1	1	1	1	1	1	1
24477964	T	C	C	C	C	C	C	1	1	1	1	1	1	62	87	60	132	40	112	1	1	1	1	1	0.967742	1	1	1	1	1	1
99695870	G	A	A	A	A	A	A	1	1	1	1	1	1	56	31	20	54	35	36	1	1	1	1	1	1	0.967742	1	1	1	1	1
43937909	T	C	C	C	C	C	C	1	1	1	1	1	1	197	121	50	160	77	44	1	1	1	0.982759	1	1	0.985294	1	1	1	1	1
91215137	A	G	G	G	G	G	G	1	1	1	1	1	1	27	40	18	21	18	34	1	1	1	1	1	1	1	1	1	0.985075	0.983051	1
22731135	T	C	C	C	C	C	C	1	1	1	1	1	1	264	218	217	250	99	177	0.993976	1	1	1	1	0.988235	0.989529	1	1	1	1	0.996429
40214844	T	C	C	C	C	C	C	1	1	1	1	1	1	218	142	93	217	143	145	1	0.982456	1	1	1	1	1	0.985714	1	1	1	1
36758376	G	A	A	A	A	A	A	1	1	1	1	1	1	68	51	43	93	49	14	1	1	1	1	1	1	1	1	1	0.968254	1	1
36758380	C	T	T	T	T	T	T	1	1	1	1	1	1	68	53	40	93	48	13	1	1	1	1	1	1	1	1	1	0.968254	1	1
36546912	A	G	G	G	G	G	G	1	1	1	1	1	1	124	126	50	115	86	138	1	0.968254	1	1	1	1	1	1	1	1	1	1
35704700	A	G	G	G	G	G	G	1	1	1	1	1	1	121	111	51	134	94	121	1	0.990826	0.993333	1	1	1	0.993827	1	1	1	0.990476	1
36758373	A	G	G	G	G	G	G	1	1	1	1	1	1	68	53	46	99	49	17	1	1	1	1	1	1	1	1	1	0.96875	1	1
5066145	C	T	T	T	T	T	T	1	1	1	1	1	1	139	108	37	114	99	77	0.96875	1	1	1	1	1	1	1	1	1	1	1
4753043	T	C	C	C	C	C	C	1	1	1	1	1	1	68	48	61	101	49	50	1	1	1	1	1	1	1	1	1	1	0.96875	1
113594945	A	G	G	G	G	G	G	1	1	1	1	1	1	72	47	36	65	58	48	1	0.96875	1	1	1	1	1	1	1	1	1	1
39509180	T	C	C	C	C	C	C	1	1	1	1	1	1	45	46	65	39	33	54	1	1	1	1	1	0.96875	1	1	1	1	1	1
25868379	A	G	G	G	G	G	G	1	1	1	1	1	1	83	77	48	132	96	60	1	1	1	1	1	0.96875	1	1	1	1	1	1
39892752	A	C	C	C	C	C	C	1	1	1	1	1	1	25	22	16	19	13	25	1	1	1	1	1	1	1	0.96875	1	1	1	1
25970291	C	G	G	G	G	G	G	1	1	1	1	1	1	86	64	68	145	50	84	1	1	1	1	1	1	0.96875	1	1	1	1	1
18012125	A	G	G	G	G	G	G	1	1	1	1	1	1	26	48	65	36	34	40	1	1	1	0.985507	1	1	1	0.983333	1	1	1	1
83474971	T	C	C	C	C	C	C	1	1	1	1	1	1	268	253	104	239	128	197	1	0.991803	1	1	1	1	1	1	0.985507	1	0.991667	1
28433234	C	T	T	T	T	T	T	1	1	1	1	1	1	78	51	50	49	42	60	1	1	1	1	1	1	1	0.987342	1	0.981651	1	1
28344194	A	G	G	G	G	G	G	1	1	1	1	1	1	119	102	98	93	50	55	0.985075	1	0.994819	1	1	1	1	1	1	0.993377	1	0.995745
18012113	A	G	G	G	G	G	G	1	1	1	1	1	1	24	48	68	36	33	40	1	1	1	0.985714	1	1	1	0.983333	1	1	1	1
89221057	A	G	G	G	G	G	G	1	1	1	1	1	1	183	349	108	190	91	88	1	0.993197	1	1	0.991525	1	1	0.990291	1	1	0.994444	1
44976426	A	C	C	C	C	C	C	1	1	1	1	1	1	76	44	26	41	49	56	1	1	1	1	1	1	1	1	1	0.982143	1	0.987342
12545064	T	C	C	C	C	C	C	1	1	1	1	1	1	63	89	29	56	41	55	1	0.969697	1	1	1	1	1	1	1	1	1	1
38756046	C	G	G	G	G	G	G	1	1	1	1	1	1	36	33	33	35	14	27	1	1	1	1	1	1	0.969697	1	1	1	1	1
88643414	G	A	A	A	A	A	A	1	1	1	1	1	1	16	21	15	37	22	94	1	1	1	1	0.969697	1	1	1	1	1	1	1
62402019	T	C	C	C	C	C	C	1	1	1	1	1	1	27	47	48	17	27	27	1	1	0.988764	1	1	1	0.981132	1	1	1	1	1
116646998	T	C	C	C	C	C	C	1	1	1	1	1	1	112	81	43	104	64	104	1	1	1	1	1	1	0.979592	1	1	1	1	0.990385
37710398	A	G	G	G	G	G	G	1	1	1	1	1	1	48	71	26	36	27	18	1	1	1	1	1	1	1	1	0.970149	1	1	1
81775943	A	G	G	G	G	G	G	1	1	1	1	1	1	792	934	549	574	394	573	0.998569	0.994612	0.999346	1	0.997382	0.99765	0.99905	0.998008	0.988372	0.999216	1	0.998066
39929027	C	T	T	T	T	T	T	1	1	1	1	1	1	62	64	103	52	66	35	1	1	1	0.979592	1	0.990783	1	1	1	1	1	1
103232838	A	G	G	G	G	G	G	1	1	1	1	1	1	32	46	23	43	49	39	1	1	1	1	1	1	1	1	1	1	1	0.970588
58590213	T	C	C	C	C	C	C	1	1	1	1	1	1	85	110	26	55	78	39	1	1	1	1	1	1	0.970588	1	1	1	1	1
15125471	T	C	C	C	C	C	C	1	1	1	1	1	1	267	151	72	200	160	85	1	1	1	1	1	1	1	0.990868	1	1	1	0.98
22730975	C	T	T	T	T	T	T	1	1	1	1	1	1	124	94	78	140	91	183	1	1	1	1	1	0.981481	1	1	1	1	1	0.989474
44291832	T	C	C	C	C	C	C	1	1	1	1	1	1	137	71	25	69	68	59	1	1	1	1	1	1	1	1	1	0.971014	1	1
39619851	A	G	G	G	G	G	G	1	1	1	1	1	1	68	70	59	87	95	70	1	1	1	1	1	1	1	1	1	1	1	0.971014
89220897	A	G	G	G	G	G	G	1	1	1	1	1	1	117	158	58	138	56	45	1	1	1	1	0.971014	1	1	1	1	1	1	1
84663004	T	C	C	C	C	C	C	1	1	1	1	1	1	133	53	27	70	84	54	1	1	1	1	1	1	0.971154	1	1	1	1	1
49661132	A	G	G	G	G	G	G	1	1	1	1	1	1	101	62	109	87	210	68	1	1	1	0.985915	1	1	1	0.988889	1	0.996622	1	1
6707129	C	T	T	T	T	T	T	1	1	1	1	1	1	32	28	31	27	30	127	1	1	1	1	0.971429	1	1	1	1	1	1	1
18012066	G	T	T	T	T	T	T	1	1	1	1	1	1	15	28	33	21	18	16	1	1	1	0.971429	1	1	1	1	1	1	1	1
41795136	A	G	G	G	G	G	G	1	1	1	1	1	1	65	70	23	41	17	45	1	1	1	1	1	1	1	1	0.971429	1	1	1
89220992	T	C	C	C	C	C	C	1	1	1	1	1	1	240	411	125	212	115	97	1	1	1	1	0.988506	1	1	0.98994	1	1	0.992991	1
25969816	T	C	C	C	C	C	C	1	1	1	1	1	1	91	76	155	174	73	81	1	1	0.980952	1	0.990654	1	1	1	1	1	1	1
22366941	A	G	G	G	G	G	G	1	1	1	1	1	1	100	81	213	112	45	90	1	1	1	0.995708	1	0.985401	0.990521	1	1	1	1	1
264261	C	T	T	T	T	T	T	1	1	1	1	1	1	72	51	81	130	50	77	1	1	1	0.971831	1	1	1	1	1	1	1	1
74103721	G	A	A	A	A	A	A	1	1	1	1	1	1	16	36	21	13	16	23	1	1	1	1	1	1	1	1	1	0.971831	1	1
56182685	T	C	C	C	C	C	C	1	1	1	1	1	1	135	149	89	144	87	144	1	1	1	1	1	1	1	1	1	1	0.971831	1
50725236	A	G	G	G	G	G	G	1	1	1	1	1	1	17	52	25	12	39	34	1	1	1	1	1	1	1	1	1	0.971831	1	1
92024838	A	G	G	G	G	G	G	1	1	1	1	1	1	70	93	57	55	18	67	1	1	1	1	1	1	1	1	1	1	1	0.971831
41507542	G	A	A	A	A	A	A	1	1	1	1	1	1	159	164	168	179	120	149	1	1	1	1	1	0.994382	1	1	1	1	0.986395	0.991071
1615869	C	T	T	T	T	T	T	1	1	1	1	1	1	135	179	61	121	42	158	0.986395	0.985507	1	1	1	1	1	1	1	1	1	1
12765060	C	A	A	A	A	A	A	1	1	1	1	1	1	138	161	35	78	63	49	0.988235	1	1	0.983871	1	1	1	1	1	1	1	1
26729768	T	C	C	C	C	C	C	1	1	1	1	1	1	200	109	64	142	94	115	0.983051	1	1	1	0.98913	1	1	1	1	1	1	1
73628918	A	G	G	G	G	G	G	1	1	1	1	1	1	243	206	132	269	146	145	0.985714	1	1	1	1	0.986486	1	1	1	1	1	1
18012067	C	G	G	G	G	G	G	1	1	1	1	1	1	15	29	33	21	17	16	1	1	1	0.972222	1	1	1	1	1	1	1	1
32445120	T	G	G	G	G	G	G	1	1	1	1	1	1	27	55	28	19	18	38	1	1	0.972222	1	1	1	1	1	1	1	1	1
52764121	A	G	G	G	G	G	G	1	1	1	1	1	1	88	98	31	79	29	38	1	1	1	1	1	1	1	1	1	0.972222	1	1
50574630	A	G	G	G	G	G	G	1	1	1	1	1	1	43	43	12	41	18	16	1	1	0.972222	1	1	1	1	1	1	1	1	1
555483	C	G	G	G	G	G	G	1	1	1	1	1	1	51	26	33	52	39	66	1	1	1	1	1	1	1	1	1	1	0.972222	1
121142324	A	T	T	T	T	T	T	1	1	1	1	1	1	62	47	13	44	19	29	1	1	1	1	0.972222	1	1	1	1	1	1	1
103233122	T	C	C	C	C	C	C	1	1	1	1	1	1	146	140	54	93	83	63	1	1	1	1	1	1	1	1	1	1	0.972222	1
33638819	T	C	C	C	C	C	C	1	1	1	1	1	1	188	136	103	135	82	91	1	1	0.988024	1	1	1	1	1	1	0.991525	1	0.992754
34283624	G	A	A	A	A	A	A	1	1	1	1	1	1	46	89	93	48	40	83	1	1	1	1	1	0.992806	1	1	1	1	0.979798	1
74930793	A	C	C	C	C	C	C	1	1	1	1	1	1	79	105	103	81	33	72	1	0.990741	1	1	1	1	0.99435	1	1	1	1	0.987603
555598	A	G	G	G	G	G	G	1	1	1	1	1	1	58	53	27	51	37	88	1	1	1	1	1	1	1	1	1	1	0.972973	1
24856040	T	C	C	C	C	C	C	1	1	1	1	1	1	192	161	147	192	151	94	1	1	1	1	1	1	1	1	0.972973	1	1	1
72590756	C	T	T	T	T	T	T	1	1	1	1	1	1	56	25	20	41	20	64	1	1	1	0.972973	1	1	1	1	1	1	1	1
103232856	T	G	G	G	G	G	G	1	1	1	1	1	1	37	59	25	57	55	38	1	1	1	1	1	1	1	1	1	1	1	0.972973
106880233	T	C	C	C	C	C	C	1	1	1	1	1	1	120	85	40	81	46	80	1	1	1	1	1	1	1	1	1	0.973333	1	1
110194691	C	T	T	T	T	T	T	1	1	1	1	1	1	253	189	303	320	108	240	1	1	1	1	1	1	1	1	1	1	0.973333	1
77495937	A	G	G	G	G	G	G	1	1	1	1	1	1	100	71	61	97	67	57	1	1	1	1	1	0.986842	0.986667	1	1	1	1	1
50126074	T	C	C	C	C	C	C	1	1	1	1	1	1	97	141	103	56	64	54	0.994186	1	1	1	0.989418	1	1	1	1	0.989924	1	1
29909815	G	A	A	A	A	A	A	1	1	1	1	1	1	53	40	28	40	34	16	1	1	0.973684	1	1	1	1	1	1	1	1	1
50343869	T	C	C	C	C	C	C	1	1	1	1	1	1	182	107	50	96	94	120	1	1	1	1	0.973684	1	1	1	1	1	1	1
38756015	A	G	G	G	G	G	G	1	1	1	1	1	1	32	34	26	29	12	31	1	1	1	1	1	1	1	1	1	1	1	0.973684
72589896	T	C	C	C	C	C	C	1	1	1	1	1	1	81	145	63	97	47	92	1	0.973684	1	1	1	1	1	1	1	1	1	1
120907568	G	C	C	C	C	C	C	1	1	1	1	1	1	22	27	19	27	18	20	1	1	1	0.973684	1	1	1	1	1	1	1	1
14671521	T	C	C	C	C	C	C	1	1	1	1	1	1	117	77	55	169	62	136	1	1	1	1	1	0.973684	1	1	1	1	1	1
128409042	A	G	G	G	G	G	G	1	1	1	1	1	1	167	151	68	214	119	151	1	1	1	1	1	1	0.989691	1	1	1	1	0.984
140578635	A	G	G	G	G	G	G	1	1	1	1	1	1	154	208	95	193	83	143	1	0.988439	0.993421	1	1	1	1	1	1	1	0.99187	1
84808462	G	C	C	C	C	C	C	1	1	1	1	1	1	30	44	20	18	23	18	1	1	1	0.974359	1	1	1	1	1	1	1	1
24887986	A	G	G	G	G	G	G	1	1	1	1	1	1	107	86	37	82	101	27	1	1	1	1	0.974359	1	1	1	1	1	1	1
6551918	A	C	C	C	C	C	C	1	1	1	1	1	1	110	75	54	114	61	54	1	1	1	1	1	1	0.974359	1	1	1	1	1
142999397	A	G	G	G	G	G	G	1	1	1	1	1	1	161	96	65	77	73	85	1	1	1	1	1	1	1	0.974359	1	1	1	1
45778577	A	G	G	G	G	G	G	1	1	1	1	1	1	59	42	35	28	16	37	1	1	1	1	0.974359	1	1	1	1	1	1	1
117321498	T	A	A	A	A	A	A	1	1	1	1	1	1	28	24	40	19	26	29	0.974359	1	1	1	1	1	1	1	1	1	1	1
94466463	A	G	G	G	G	G	G	1	1	1	1	1	1	520	262	112	335	349	394	1	0.996503	1	0.996678	0.995169	1	1	0.996633	1	1	0.989437	1
25949968	T	C	C	C	C	C	C	1	1	1	1	1	1	65	95	83	100	24	66	0.984375	1	1	1	1	1	1	1	1	1	1	0.990291
68167076	T	C	C	C	C	C	C	1	1	1	1	1	1	234	249	94	152	123	212	1	1	1	1	1	1	1	1	1	0.974684	1	1
25809841	C	T	T	T	T	T	T	1	1	1	1	1	1	99	104	74	58	41	113	1	1	1	1	1	1	1	1	1	1	0.986842	0.988024
147593909	T	G	G	G	G	G	G	1	1	1	1	1	1	100	74	40	71	94	38	1	1	1	1	1	0.986301	1	1	1	1	0.996094	0.992593
15275547	A	G	G	G	G	G	G	1	1	1	1	1	1	201	95	38	133	81	76	1	0.975	1	1	1	1	1	1	1	1	1	1
28488278	C	G	G	G	G	G	G	1	1	1	1	1	1	29	66	59	45	16	44	1	1	1	1	1	1	1	0.975	1	1	1	1
12544912	A	G	G	G	G	G	G	1	1	1	1	1	1	103	114	33	81	47	60	1	1	1	1	1	1	1	1	1	0.975	1	1
142999418	A	G	G	G	G	G	G	1	1	1	1	1	1	162	95	71	75	72	84	1	1	1	1	1	1	1	0.975	1	1	1	1
55611675	G	A	A	A	A	A	A	1	1	1	1	1	1	32	31	18	30	17	26	1	1	1	1	1	1	1	1	1	0.975	1	1
272674	C	G	G	G	G	G	G	1	1	1	1	1	1	168	140	61	233	110	74	1	1	1	1	0.975	1	1	1	1	1	1	1
88642506	T	A	A	A	A	A	A	1	1	1	1	1	1	22	21	14	12	12	51	1	1	1	1	0.975	1	1	1	1	1	1	1
79570737	A	G	G	G	G	G	G	1	1	1	1	1	1	132	69	80	127	49	119	1	1	1	1	1	1	1	1	1	1	1	0.975309
11883700	G	A	A	A	A	A	A	1	1	1	1	1	1	19	22	42	14	10	40	1	1	1	1	1	0.97561	1	1	1	1	1	1
11376796	C	T	T	T	T	T	T	1	1	1	1	1	1	44	24	53	39	39	70	1	1	1	1	1	1	1	1	1	1	1	0.97561
86620456	C	G	G	G	G	G	G	1	1	1	1	1	1	94	81	62	68	53	96	1	1	1	1	1	1	0.97561	1	1	1	1	1
28834570	C	T	T	T	T	T	T	1	1	1	1	1	1	166	71	48	134	52	96	1	1	1	1	1	1	0.97561	1	1	1	1	1
29777591	T	C	C	C	C	C	C	1	1	1	1	1	1	52	74	66	66	18	22	1	1	1	1	0.97561	1	1	1	1	1	1	1
29909859	G	T	T	T	T	T	T	1	1	1	1	1	1	91	69	51	78	49	52	1	1	1	1	1	0.97561	1	1	1	1	1	1
86620613	G	C	C	C	C	C	C	1	1	1	1	1	1	210	135	62	145	113	188	0.975904	1	1	1	1	1	1	1	1	1	1	1
65648569	A	G	G	G	G	G	G	1	1	1	1	1	1	169	128	81	161	121	120	1	1	1	1	1	1	1	1	1	1	0.982301	0.993671
97126571	G	C	C	C	C	C	C	1	1	1	1	1	1	163	163	188	204	126	264	1	1	1	0.996403	1	1	1	1	1	1	0.979592	1
6448566	G	T	T	T	T	T	T	1	1	1	1	1	1	59	97	62	43	17	44	1	0.991071	1	1	1	1	1	0.98913	1	1	1	0.995816
6156092	A	G	G	G	G	G	G	1	1	1	1	1	1	609	349	169	279	239	205	0.995624	1	1	0.983713	1	1	1	0.996689	1	1	1	1
41399146	T	G	G	G	G	G	G	1	1	1	1	1	1	86	130	43	81	48	17	1	0.988095	0.987952	1	1	1	1	1	1	1	1	1
12764820	T	C	C	C	C	C	C	1	1	1	1	1	1	405	425	94	412	199	149	0.994186	1	0.996678	0.995	1	1	0.990244	1	1	1	1	1
2213	T	C	C	C	C	C	C	1	1	1	1	1	1	189	222	79	170	67	67	1	1	0.984496	1	1	1	1	0.996564	1	0.995074	1	1
40174811	T	C	C	C	C	C	C	1	1	1	1	1	1	115	189	51	72	82	89	1	1	1	0.993151	1	1	1	0.990291	1	1	1	0.992701
11883773	G	C	C	C	C	C	C	1	1	1	1	1	1	18	12	76	25	15	67	1	1	1	1	1	0.97619	1	1	1	1	1	1
137783556	C	G	G	G	G	G	G	1	1	1	1	1	1	95	81	54	111	56	70	1	1	1	1	1	1	1	1	1	1	0.97619	1
38401101	A	G	G	G	G	G	G	1	1	1	1	1	1	62	30	19	39	21	40	1	1	1	1	1	1	1	1	1	1	1	0.97619
9377435	T	C	C	C	C	C	C	1	1	1	1	1	1	62	131	22	90	53	51	1	1	1	1	1	1	1	0.97619	1	1	1	1
91826390	A	G	G	G	G	G	G	1	1	1	1	1	1	56	37	38	71	31	67	1	1	1	1	0.97619	1	1	1	1	1	1	1
8427211	A	G	G	G	G	G	G	1	1	1	1	1	1	98	67	60	109	40	30	1	1	1	0.99435	1	1	1	0.993711	1	0.988166	1	1
27685113	G	A	A	A	A	A	A	1	1	1	1	1	1	168	135	141	254	77	278	1	1	1	1	1	1	1	0.993789	1	1	0.982609	1
22731219	A	G	G	G	G	G	G	1	1	1	1	1	1	169	134	149	173	62	58	0.991736	1	1	1	1	1	1	0.990476	1	1	1	0.994253
125767414	G	A	A	A	A	A	A	1	1	1	1	1	1	503	578	445	464	257	504	0.988024	1	1	1	1	1	1	1	0.991803	0.996705	1	1
22366810	G	T	T	T	T	T	T	1	1	1	1	1	1	39	31	64	45	31	30	1	1	1	1	0.976744	1	1	1	1	1	1	1
37710433	A	G	G	G	G	G	G	1	1	1	1	1	1	76	94	54	53	38	34	1	1	1	1	1	1	1	1	0.976744	1	1	1
50652051	A	G	G	G	G	G	G	1	1	1	1	1	1	100	44	30	85	64	64	1	1	1	1	1	1	0.976744	1	1	1	1	1
29529197	A	G	G	G	G	G	G	1	1	1	1	1	1	101	45	16	52	27	14	1	1	0.976744	1	1	1	1	1	1	1	1	1
23734167	G	C	C	C	C	C	C	1	1	1	1	1	1	71	75	25	71	35	190	1	1	1	0.976744	1	1	1	1	1	1	1	1
89220234	T	C	C	C	C	C	C	1	1	1	1	1	1	104	207	15	77	41	22	1	1	1	1	0.976744	1	1	1	1	1	1	1
102793450	T	C	C	C	C	C	C	1	1	1	1	1	1	29	14	10	18	18	78	1	1	1	0.976744	1	1	1	1	1	1	1	1
94064958	A	C	C	C	C	C	C	1	1	1	1	1	1	100	73	119	83	46	68	1	1	0.987179	1	0.989583	1	1	1	1	1	1	1
12265962	G	A	A	A	A	A	A	1	1	1	1	1	1	113	85	91	179	82	95	1	0.989362	1	1	1	1	1	0.9875	1	1	1	1
130066421	T	C	C	C	C	C	C	1	1	1	1	1	1	553	512	258	663	308	531	1	1	0.997449	1	1	0.995763	0.997403	1	0.994118	1	0.992248	1
43529939	T	C	C	C	C	C	C	1	1	1	1	1	1	338	581	172	247	181	204	0.993311	1	1	1	1	0.991189	0.992701	1	1	1	1	1
11883769	G	A	A	A	A	A	A	1	1	1	1	1	1	20	13	76	25	15	68	1	1	1	1	1	0.977273	1	1	1	1	1	1
19400874	G	A	A	A	A	A	A	1	1	1	1	1	1	43	31	39	42	37	43	1	1	1	1	1	1	1	0.977273	1	1	1	1
25313779	G	A	A	A	A	A	A	1	1	1	1	1	1	34	27	22	23	21	21	1	1	1	1	1	1	1	1	1	1	0.977273	1
48776279	A	G	G	G	G	G	G	1	1	1	1	1	1	37	36	24	44	40	17	1	1	1	0.977273	1	1	1	1	1	1	1	1
13276159	A	C	C	C	C	C	C	1	1	1	1	1	1	38	32	41	20	20	28	1	1	1	1	1	0.977273	1	1	1	1	1	1
106879978	A	T	T	T	T	T	T	1	1	1	1	1	1	117	65	38	60	41	62	1	1	1	1	1	1	1	0.977273	1	1	1	1
41399020	C	T	T	T	T	T	T	1	1	1	1	1	1	44	39	12	36	30	19	1	1	1	0.977273	1	1	1	1	1	1	1	1
26529950	A	G	G	G	G	G	G	1	1	1	1	1	1	313	412	76	219	158	196	0.99569	0.994681	0.996516	0.995122	1	1	1	1	1	1	0.995305	1
130066795	T	C	C	C	C	C	C	1	1	1	1	1	1	349	306	143	279	180	348	1	1	1	0.996575	0.994152	0.990291	1	1	1	1	1	0.99631
55488224	T	C	C	C	C	C	C	1	1	1	1	1	1	159	191	68	89	63	114	1	0.977528	1	1	1	1	1	1	1	1	1	1
142999241	C	T	T	T	T	T	T	1	1	1	1	1	1	223	231	167	112	86	200	1	1	1	1	1	1	1	0.982036	1	0.99569	1	1
89220902	A	G	G	G	G	G	G	1	1	1	1	1	1	116	159	56	137	57	45	1	1	1	0.993377	1	1	0.99	0.994382	1	1	1	1
57121382	T	C	C	C	C	C	C	1	1	1	1	1	1	204	125	44	173	118	79	1	1	1	0.977778	1	1	1	1	1	1	1	1
39741787	A	G	G	G	G	G	G	1	1	1	1	1	1	68	48	20	10	38	24	1	1	1	0.977778	1	1	1	1	1	1	1	1
106880272	T	C	C	C	C	C	C	1	1	1	1	1	1	85	82	43	66	54	79	1	1	1	1	1	1	1	1	1	0.977778	1	1
41399023	A	G	G	G	G	G	G	1	1	1	1	1	1	40	36	12	37	30	18	1	1	1	0.977778	1	1	1	1	1	1	1	1
41399025	A	G	G	G	G	G	G	1	1	1	1	1	1	45	38	12	37	30	19	1	1	1	0.977778	1	1	1	1	1	1	1	1
18474220	T	C	C	C	C	C	C	1	1	1	1	1	1	135	71	43	65	48	70	1	1	1	1	0.977778	1	1	1	1	1	1	1
94392893	A	G	G	G	G	G	G	1	1	1	1	1	1	38	24	22	19	11	26	0.977778	1	1	1	1	1	1	1	1	1	1	1
14925398	A	G	G	G	G	G	G	1	1	1	1	1	1	52	67	45	56	50	47	1	1	1	1	1	1	0.978022	1	1	1	1	1
74453999	T	C	C	C	C	C	C	1	1	1	1	1	1	45	43	22	49	69	71	1	1	0.978022	1	1	1	1	1	1	1	1	1
64127762	T	C	C	C	C	C	C	1	1	1	1	1	1	158	162	192	234	104	162	0.978261	1	1	1	1	1	1	1	1	1	1	1
84007829	G	A	A	A	A	A	A	1	1	1	1	1	1	142	79	35	87	66	69	1	1	1	1	1	1	1	1	0.978261	1	1	1
84007868	G	A	A	A	A	A	A	1	1	1	1	1	1	124	72	47	85	70	51	1	1	1	1	1	1	1	1	0.978261	1	1	1
93872490	C	T	T	T	T	T	T	1	1	1	1	1	1	111	131	54	92	52	87	1	1	1	0.978261	1	1	1	1	1	1	1	1
82512957	A	G	G	G	G	G	G	1	1	1	1	1	1	278	181	158	289	137	237	0.982609	1	0.99569	1	1	1	1	1	1	1	1	1
46307598	A	G	G	G	G	G	G	1	1	1	1	1	1	92	103	47	74	139	122	1	1	0.993197	1	1	1	1	1	1	1	1	0.985294
29909935	C	T	T	T	T	T	T	1	1	1	1	1	1	103	69	53	77	46	56	1	1	1	1	1	1	0.988235	1	1	1	1	0.990385
86778738	A	C	C	C	C	C	C	1	1	1	1	1	1	39	45	19	46	21	47	1	1	0.978723	1	1	1	1	1	1	1	1	1
36365667	A	G	G	G	G	G	G	1	1	1	1	1	1	48	38	23	60	44	56	1	1	1	0.978723	1	1	1	1	1	1	1	1
13606909	T	A	A	A	A	A	A	1	1	1	1	1	1	92	100	81	116	54	48	1	1	1	1	1	1	1	1	0.978723	1	1	1
17044354	C	G	G	G	G	G	G	1	1	1	1	1	1	98	28	30	62	75	59	1	1	1	1	1	1	1	1	1	1	1	0.978723
28344110	C	T	T	T	T	T	T	1	1	1	1	1	1	65	38	34	44	30	36	1	1	1	1	1	0.978723	1	1	1	1	1	1
38683787	T	C	C	C	C	C	C	1	1	1	1	1	1	54	72	29	58	34	31	1	1	1	0.978723	1	1	1	1	1	1	1	1
13607008	A	G	G	G	G	G	G	1	1	1	1	1	1	256	244	214	232	141	151	1	1	1	1	1	1	1	0.994065	1	1	0.989848	0.994975
119489651	T	C	C	C	C	C	C	1	1	1	1	1	1	141	63	23	58	54	25	1	1	0.978947	1	1	1	1	1	1	1	1	1
89221083	A	G	G	G	G	G	G	1	1	1	1	1	1	69	184	48	120	55	47	1	1	1	1	1	1	1	0.985816	1	0.993197	1	1
61928330	C	T	T	T	T	T	T	1	1	1	1	1	1	431	290	246	425	237	304	0.994475	1	0.997653	0.991176	1	0.995798	1	1	1	1	1	1
56969258	C	T	T	T	T	T	T	1	1	1	1	1	1	93	121	57	122	41	93	1	0.988506	1	1	0.990654	1	1	1	1	1	1	1
25281498	T	C	C	C	C	C	C	1	1	1	1	1	1	27	56	46	89	40	85	0.979167	1	1	1	1	1	1	1	1	1	1	1
6355911	C	T	T	T	T	T	T	1	1	1	1	1	1	61	29	25	39	34	32	1	1	1	1	1	0.979167	1	1	1	1	1	1
34283589	C	G	G	G	G	G	G	1	1	1	1	1	1	35	57	48	31	18	44	1	1	1	1	1	1	0.979167	1	1	1	1	1
88642570	T	C	C	C	C	C	C	1	1	1	1	1	1	25	25	23	17	15	76	1	1	1	0.979167	1	1	1	1	1	1	1	1
39875838	C	T	T	T	T	T	T	1	1	1	1	1	1	83	39	40	66	22	26	1	1	1	0.979167	1	1	1	1	1	1	1	1
44213395	C	T	T	T	T	T	T	1	1	1	1	1	1	97	37	73	78	68	58	1	0.988764	1	0.990476	1	1	1	1	1	1	1	1
1541616	A	G	G	G	G	G	G	1	1	1	1	1	1	429	333	111	273	251	190	1	1	1	0.995726	1	1	0.997904	0.993865	1	1	0.991803	1
48173173	T	C	C	C	C	C	C	1	1	1	1	1	1	179	135	59	119	91	98	1	1	1	1	1	1	1	1	0.979381	1	1	1
24958399	T	C	C	C	C	C	C	1	1	1	1	1	1	183	292	219	172	103	100	1	0.995652	1	1	1	1	0.996875	1	0.989583	1	1	0.997319
94003649	A	G	G	G	G	G	G	1	1	1	1	1	1	623	468	360	563	229	101	0.99422	1	0.99729	1	0.997988	0.998043	1	1	1	0.998512	0.996176	0.997257
42210739	T	C	C	C	C	C	C	1	1	1	1	1	1	474	177	48	383	247	201	1	1	1	0.993056	1	0.991228	1	1	1	0.995261	1	1
42269298	A	G	G	G	G	G	G	1	1	1	1	1	1	173	173	67	159	104	134	1	0.990196	1	1	0.989362	1	1	1	1	1	1	1
83481629	T	C	C	C	C	C	C	1	1	1	1	1	1	35	17	15	26	15	15	1	1	1	1	1	1	1	1	1	1	0.979592	1
38756185	T	C	C	C	C	C	C	1	1	1	1	1	1	54	50	42	77	20	26	1	1	0.979592	1	1	1	1	1	1	1	1	1
84414432	T	G	G	G	G	G	G	1	1	1	1	1	1	55	48	17	40	52	61	1	1	0.979592	1	1	1	1	1	1	1	1	1
41399009	A	G	G	G	G	G	G	1	1	1	1	1	1	41	37	12	35	27	18	1	1	1	0.979592	1	1	1	1	1	1	1	1
9823153	A	G	G	G	G	G	G	1	1	1	1	1	1	72	117	21	45	54	77	1	1	1	1	1	1	1	1	1	1	0.979592	1
74454117	A	G	G	G	G	G	G	1	1	1	1	1	1	37	23	20	31	51	48	1	1	0.979592	1	1	1	1	1	1	1	1	1
140578647	A	G	G	G	G	G	G	1	1	1	1	1	1	99	154	61	148	53	63	1	0.992481	1	0.987179	1	1	1	1	1	1	1	1
64587101	A	G	G	G	G	G	G	1	1	1	1	1	1	217	181	170	284	150	164	1	1	1	1	1	1	1	1	0.984848	0.994819	1	1
27388470	A	G	G	G	G	G	G	1	1	1	1	1	1	122	100	36	62	96	90	1	1	1	1	1	0.98	1	1	1	1	1	1
54460326	C	G	G	G	G	G	G	1	1	1	1	1	1	46	29	33	46	26	37	0.98	1	1	1	1	1	1	1	1	1	1	1
29529116	A	G	G	G	G	G	G	1	1	1	1	1	1	93	49	39	46	58	40	1	1	1	1	1	1	1	1	1	1	0.98	1
28344497	A	G	G	G	G	G	G	1	1	1	1	1	1	44	18	40	46	18	16	1	1	1	1	1	0.98	1	1	1	1	1	1
90304912	A	G	G	G	G	G	G	1	1	1	1	1	1	54	78	41	94	12	41	0.98	1	1	1	1	1	1	1	1	1	1	1
1615922	T	C	C	C	C	C	C	1	1	1	1	1	1	134	175	55	123	41	151	1	1	1	1	1	0.988372	0.991667	1	1	1	1	1
6156525	A	G	G	G	G	G	G	1	1	1	1	1	1	389	325	130	219	222	232	0.99	0.995434	1	1	1	1	1	0.994737	1	1	1	1
75235063	T	A	A	A	A	A	A	1	1	1	1	1	1	58	73	12	41	30	83	1	1	0.980198	1	1	1	1	1	1	1	1	1
12756450	A	G	G	G	G	G	G	1	1	1	1	1	1	86	124	116	47	38	43	0.990909	1	0.989305	1	1	1	1	1	1	1	1	1
107981582	A	G	G	G	G	G	G	1	1	1	1	1	1	460	319	36	245	197	156	1	1	1	1	1	0.991803	1	1	1	0.988439	1	1
11883763	T	C	C	C	C	C	C	1	1	1	1	1	1	26	23	76	27	16	70	1	1	1	1	1	0.980392	1	1	1	1	1	1
11376853	G	A	A	A	A	A	A	1	1	1	1	1	1	44	29	54	53	44	73	1	1	1	1	1	1	1	1	1	1	1	0.980392
45782038	A	G	G	G	G	G	G	1	1	1	1	1	1	22	73	79	23	20	35	1	1	1	1	1	1	1	1	1	0.980392	1	1
50652435	C	G	G	G	G	G	G	1	1	1	1	1	1	111	97	59	77	77	63	1	0.980392	1	1	1	1	1	1	1	1	1	1
7036974	T	C	C	C	C	C	C	1	1	1	1	1	1	33	39	18	29	25	41	1	1	1	1	1	1	1	1	1	1	0.980392	1
28344529	C	G	G	G	G	G	G	1	1	1	1	1	1	28	28	42	54	29	22	1	1	1	1	1	0.980392	1	1	1	1	1	1
28433161	C	T	T	T	T	T	T	1	1	1	1	1	1	43	39	19	37	30	33	1	1	1	1	1	1	1	0.980392	1	1	1	1
58590638	T	C	C	C	C	C	C	1	1	1	1	1	1	91	119	39	50	57	43	1	1	1	1	0.980392	1	1	1	1	1	1	1
5534378	T	C	C	C	C	C	C	1	1	1	1	1	1	104	106	104	109	57	58	1	1	0.992308	1	1	1	1	1	1	1	0.988095	1
102718132	T	C	C	C	C	C	C	1	1	1	1	1	1	153	188	77	168	113	74	1	1	1	1	1	0.990566	1	1	1	0.989848	1	1
50652294	C	G	G	G	G	G	G	1	1	1	1	1	1	228	166	97	177	138	120	1	1	0.989011	1	1	1	1	1	1	1	1	0.991453
22671660	A	G	G	G	G	G	G	1	1	1	1	1	1	327	265	256	329	176	221	1	1	1	1	1	1	1	1	0.980583	1	1	1
89221062	A	G	G	G	G	G	G	1	1	1	1	1	1	178	339	110	190	90	83	1	1	1	0.988417	1	1	1	0.992228	1	1	1	1
87345252	C	G	G	G	G	G	G	1	1	1	1	1	1	102	114	27	55	38	93	1	1	1	1	1	1	1	0.993377	1	1	0.987342	1
11376841	A	G	G	G	G	G	G	1	1	1	1	1	1	56	33	72	59	50	82	1	1	1	1	1	1	1	1	1	1	1	0.980769
59706834	T	C	C	C	C	C	C	1	1	1	1	1	1	86	72	22	75	33	83	1	1	1	0.980769	1	1	1	1	1	1	1	1
13276026	T	C	C	C	C	C	C	1	1	1	1	1	1	65	64	62	43	37	38	1	1	1	1	1	1	1	1	1	1	1	0.980769
54901344	T	C	C	C	C	C	C	1	1	1	1	1	1	284	248	231	302	239	682	1	1	1	1	1	1	1	1	1	0.988024	1	0.992857
105475800	T	C	C	C	C	C	C	1	1	1	1	1	1	977	996	421	851	565	453	0.996383	1	0.996201	1	0.998418	0.997028	0.997669	1	1	0.997625	1	0.997605
71346102	G	C	C	C	C	C	C	1	1	1	1	1	1	88	79	53	89	66	104	1	1	1	1	1	1	1	1	1	1	1	0.980952
11883717	T	C	C	C	C	C	C	1	1	1	1	1	1	25	25	65	26	16	71	1	1	1	1	1	0.981132	1	1	1	1	1	1
51669180	A	T	T	T	T	T	T	1	1	1	1	1	1	53	50	18	66	62	63	1	1	1	0.981132	1	1	1	1	1	1	1	1
22391402	A	G	G	G	G	G	G	1	1	1	1	1	1	48	19	27	38	21	74	1	1	1	0.981132	1	1	1	1	1	1	1	1
14983636	A	G	G	G	G	G	G	1	1	1	1	1	1	115	85	47	86	66	47	1	1	1	1	1	1	1	1	1	1	0.981132	1
49530686	C	T	T	T	T	T	T	1	1	1	1	1	1	30	54	21	40	23	14	1	1	1	1	1	1	1	1	1	1	1	0.981132
69576528	A	G	G	G	G	G	G	1	1	1	1	1	1	146	284	254	368	148	255	1	1	1	1	0.990566	1	0.990654	1	1	1	1	1
77913532	T	C	C	C	C	C	C	1	1	1	1	1	1	83	76	117	179	134	273	1	1	1	1	1	1	1	1	1	1	0.981308	1
33087366	T	C	C	C	C	C	C	1	1	1	1	1	1	635	555	454	663	469	492	0.997778	1	1	1	1	1	0.996522	1	1	1	0.99403	0.992982
33087317	T	C	C	C	C	C	C	1	1	1	1	1	1	320	263	168	311	243	254	1	1	1	1	1	1	0.995935	1	1	1	0.985507	1
73263685	C	T	T	T	T	T	T	1	1	1	1	1	1	40	51	52	31	33	54	1	1	1	1	1	1	1	0.989583	1	1	1	0.99187
77493318	C	T	T	T	T	T	T	1	1	1	1	1	1	144	109	43	166	67	57	1	1	1	1	1	1	1	0.981481	1	1	1	1
39509280	A	G	G	G	G	G	G	1	1	1	1	1	1	51	57	59	40	36	35	1	1	1	1	1	0.981481	1	1	1	1	1	1
87375396	T	C	C	C	C	C	C	1	1	1	1	1	1	99	72	52	85	52	164	1	0.981481	1	1	1	1	1	1	1	1	1	1
6156019	A	G	G	G	G	G	G	1	1	1	1	1	1	627	339	143	222	274	185	0.993166	1	1	0.988406	1	1	1	1	1	1	1	1
97883769	T	C	C	C	C	C	C	1	1	1	1	1	1	271	480	436	185	192	1020	0.994318	0.998494	0.997442	1	1	0.998145	0.998267	1	1	0.997211	1	0.997706
84325160	G	A	A	A	A	A	A	1	1	1	1	1	1	678	346	162	317	150	249	1	0.985401	1	0.996364	1	1	1	1	1	1	1	1
34283599	T	G	G	G	G	G	G	1	1	1	1	1	1	39	70	63	40	23	61	1	1	1	1	1	0.981818	1	1	1	1	1	1
50911838	G	A	A	A	A	A	A	1	1	1	1	1	1	150	92	26	104	77	83	1	1	1	1	1	1	1	1	1	1	1	0.981818
94466440	A	G	G	G	G	G	G	1	1	1	1	1	1	481	254	121	338	349	348	1	1	0.994885	1	1	0.996183	1	1	0.993548	1	1	0.997253
130066361	T	C	C	C	C	C	C	1	1	1	1	1	1	751	638	346	803	364	576	1	1	1	0.995536	0.994059	1	1	0.997763	1	0.997423	0.997175	1
114171064	C	T	T	T	T	T	T	1	1	1	1	1	1	108	111	224	98	96	291	1	0.989529	1	0.992453	1	1	1	1	1	1	1	1
54901157	A	G	G	G	G	G	G	1	1	1	1	1	1	94	67	77	93	71	131	1	1	1	1	1	1	1	0.989247	1	1	1	0.992754
11376825	C	T	T	T	T	T	T	1	1	1	1	1	1	53	37	70	57	49	85	1	1	1	1	1	1	1	1	1	1	1	0.982143
43781761	T	G	G	G	G	G	G	1	1	1	1	1	1	68	33	44	41	54	73	1	1	1	1	1	1	1	0.982143	1	1	1	1
105172463	T	C	C	C	C	C	C	1	1	1	1	1	1	139	176	75	148	65	124	1	1	1	1	1	1	1	1	1	0.982301	1	1
50652209	T	C	C	C	C	C	C	1	1	1	1	1	1	214	203	65	190	150	131	1	1	1	0.982301	1	1	1	1	1	1	1	1
89220029	A	G	G	G	G	G	G	1	1	1	1	1	1	49	102	15	30	18	15	1	1	1	1	1	1	1	0.982456	1	1	1	1
130065577	A	G	G	G	G	G	G	1	1	1	1	1	1	330	297	144	364	227	324	1	1	1	1	1	1	0.982558	1	1	1	1	1
72916699	A	G	G	G	G	G	G	1	1	1	1	1	1	109	112	250	124	51	141	1	1	1	1	1	1	1	0.995745	0.993464	1	1	0.993355
50151810	A	G	G	G	G	G	G	1	1	1	1	1	1	120	111	179	90	53	58	1	1	1	1	1	1	0.982659	1	1	1	1	1
24442675	A	G	G	G	G	G	G	1	1	1	1	1	1	285	230	126	268	136	186	1	0.994118	1	1	1	1	1	1	1	0.988571	1	1
87555863	T	C	C	C	C	C	C	1	1	1	1	1	1	617	389	175	425	482	590	1	1	0.995106	1	1	1	0.997429	0.992806	1	1	0.997375	1
55592386	C	T	T	T	T	T	T	1	1	1	1	1	1	79	81	38	61	38	54	1	1	1	1	1	1	1	1	1	0.982759	1	1
68166892	T	C	C	C	C	C	C	1	1	1	1	1	1	120	133	54	94	57	153	1	1	1	1	1	1	1	1	1	1	0.982759	1
70910509	T	C	C	C	C	C	C	1	1	1	1	1	1	128	126	85	122	100	180	1	0.982759	1	1	1	1	1	1	1	1	1	1
10220397	C	T	T	T	T	T	T	1	1	1	1	1	1	149	77	63	78	24	35	1	1	1	1	1	1	1	0.982759	1	1	1	1
91215136	C	T	T	T	T	T	T	1	1	1	1	1	1	27	41	18	21	18	35	1	1	1	1	1	1	1	1	1	1	0.982759	1
91215144	C	T	T	T	T	T	T	1	1	1	1	1	1	27	41	15	21	18	35	1	1	1	1	1	1	1	1	1	1	0.982759	1
9377563	C	G	G	G	G	G	G	1	1	1	1	1	1	159	216	85	184	126	121	1	1	1	1	1	0.982759	1	1	1	1	1	1
84008134	A	G	G	G	G	G	G	1	1	1	1	1	1	59	84	79	88	44	65	1	1	1	1	1	1	1	0.983051	1	1	1	1
53096067	A	C	C	C	C	C	C	1	1	1	1	1	1	88	49	14	52	36	20	1	1	0.983051	1	1	1	1	1	1	1	1	1
4755338	T	C	C	C	C	C	C	1	1	1	1	1	1	47	16	47	88	19	45	0.983051	1	1	1	1	1	1	1	1	1	1	1
14949177	T	C	C	C	C	C	C	1	1	1	1	1	1	52	35	36	71	44	20	1	1	0.983051	1	1	1	1	1	1	1	1	1
93524857	A	G	G	G	G	G	G	1	1	1	1	1	1	64	23	75	95	36	51	1	1	0.983051	1	1	1	1	1	1	1	1	1
89221092	A	G	G	G	G	G	G	1	1	1	1	1	1	71	178	45	119	49	48	1	1	1	1	1	1	0.990291	0.993007	1	1	1	1
55592391	A	G	G	G	G	G	G	1	1	1	1	1	1	87	91	44	69	48	67	1	1	1	1	1	1	1	1	1	0.983333	1	1
56444386	T	C	C	C	C	C	C	1	1	1	1	1	1	161	92	71	125	132	87	1	1	1	1	1	1	0.983333	1	1	1	1	1
14925290	T	C	C	C	C	C	C	1	1	1	1	1	1	84	32	47	51	33	34	1	1	1	1	1	1	0.983333	1	1	1	1	1
29909944	T	C	C	C	C	C	C	1	1	1	1	1	1	110	83	63	89	51	61	0.983333	1	1	1	1	1	1	1	1	1	1	1
116237720	A	G	G	G	G	G	G	1	1	1	1	1	1	122	73	51	85	69	45	1	1	1	1	1	0.983333	1	1	1	1	1	1
57903634	T	C	C	C	C	C	C	1	1	1	1	1	1	223	196	226	231	101	155	1	1	1	0.995227	1	1	1	1	1	1	0.992593	0.995662
15275003	G	A	A	A	A	A	A	1	1	1	1	1	1	99	73	65	90	51	83	1	1	1	0.983607	1	1	1	1	1	1	1	1
81019381	A	G	G	G	G	G	G	1	1	1	1	1	1	95	66	60	79	46	129	1	1	1	0.983607	1	1	1	1	1	1	1	1
84007615	C	G	G	G	G	G	G	1	1	1	1	1	1	86	43	65	84	65	45	1	1	0.983607	1	1	1	1	1	1	1	1	1
27388655	G	A	A	A	A	A	A	1	1	1	1	1	1	153	87	44	50	102	56	1	1	1	1	1	0.983607	1	1	1	1	1	1
115291969	T	C	C	C	C	C	C	1	1	1	1	1	1	74	58	68	86	27	42	1	0.983607	1	1	1	1	1	1	1	1	1	1
41399129	A	G	G	G	G	G	G	1	1	1	1	1	1	68	108	29	63	44	16	1	1	1	1	1	1	0.983607	1	1	1	1	1
89220364	A	G	G	G	G	G	G	1	1	1	1	1	1	43	54	20	81	17	24	1	1	1	1	1	1	1	1	1	1	0.983607	1
28525439	A	G	G	G	G	G	G	1	1	1	1	1	1	375	287	105	274	162	127	1	1	1	1	0.995025	1	0.995868	0.992727	1	1	1	1
22391488	A	G	G	G	G	G	G	1	1	1	1	1	1	258	135	121	221	162	579	1	0.995556	1	1	0.993631	1	1	1	1	0.994444	1	1
48173356	A	G	G	G	G	G	G	1	1	1	1	1	1	280	192	72	193	133	155	0.990566	1	1	1	1	1	1	1	1	1	1	0.993151
3170628	A	G	G	G	G	G	G	1	1	1	1	1	1	40	25	34	40	25	41	1	1	1	1	1	1	1	1	1	1	1	0.98374
22731183	C	T	T	T	T	T	T	1	1	1	1	1	1	224	181	214	231	82	91	0.993103	1	1	1	1	1	1	1	1	1	1	0.990654
35705142	G	A	A	A	A	A	A	1	1	1	1	1	1	199	97	56	114	88	68	1	1	0.993789	1	1	0.99	1	1	1	1	1	1
48776679	T	C	C	C	C	C	C	1	1	1	1	1	1	176	181	110	185	120	139	1	1	1	0.994764	1	1	1	0.989071	1	1	1	1
35706265	A	G	G	G	G	G	G	1	1	1	1	1	1	228	151	83	202	117	124	1	1	0.994595	1	1	1	0.993197	1	1	0.996078	1	1
83474987	T	C	C	C	C	C	C	1	1	1	1	1	1	92	93	40	77	59	139	1	1	1	1	1	1	1	1	1	1	0.983871	1
83474583	G	A	A	A	A	A	A	1	1	1	1	1	1	193	204	36	201	129	71	1	0.991379	1	1	1	1	0.996032	1	1	1	1	0.996479
125767393	G	A	A	A	A	A	A	1	1	1	1	1	1	677	877	768	632	361	688	0.992908	1	1	1	1	1	0.999012	1	0.992126	1	1	1
17044946	C	T	T	T	T	T	T	1	1	1	1	1	1	74	36	69	68	52	77	1	1	0.984127	1	1	1	1	1	1	1	1	1
12544821	A	G	G	G	G	G	G	1	1	1	1	1	1	151	151	41	66	58	60	1	1	1	1	1	1	1	0.984252	1	1	1	1
44977631	A	C	C	C	C	C	C	1	1	1	1	1	1	145	95	38	89	82	34	1	1	1	0.984375	1	1	1	1	1	1	1	1
54051338	A	C	C	C	C	C	C	1	1	1	1	1	1	24	24	27	12	22	48	1	1	1	0.984375	1	1	1	1	1	1	1	1
81908045	C	T	T	T	T	T	T	1	1	1	1	1	1	155	160	179	85	79	45	1	0.987013	1	1	1	0.997389	1	1	1	1	1	1
3170566	A	G	G	G	G	G	G	1	1	1	1	1	1	16	10	18	26	14	16	1	1	1	1	1	1	0.984615	1	1	1	1	1
28344353	A	G	G	G	G	G	G	1	1	1	1	1	1	30	45	22	59	42	10	1	1	0.984615	1	1	1	1	1	1	1	1	1
94466393	T	C	C	C	C	C	C	1	1	1	1	1	1	470	258	127	315	372	342	0.991453	1	1	0.996599	1	1	1	0.996622	1	1	1	1
1541637	A	G	G	G	G	G	G	1	1	1	1	1	1	390	309	89	250	246	179	1	1	1	1	0.987952	1	1	1	1	0.996795	1	1
62082056	T	C	C	C	C	C	C	1	1	1	1	1	1	127	86	47	65	54	130	1	1	1	1	1	1	0.984848	1	1	1	1	1
41827838	A	G	G	G	G	G	G	1	1	1	1	1	1	694	1102	610	701	605	1275	0.994444	1	1	1	1	1	1	1	0.992386	1	1	0.998127
22015430	T	C	C	C	C	C	C	1	1	1	1	1	1	194	275	115	162	80	164	0.988636	1	0.996337	1	1	1	1	1	1	1	1	1
11885002	T	C	C	C	C	C	C	1	1	1	1	1	1	135	155	101	132	91	112	1	1	1	1	1	1	0.985075	1	1	1	1	1
44976953	T	C	C	C	C	C	C	1	1	1	1	1	1	58	118	44	93	61	14	1	1	1	1	1	1	0.985075	1	1	1	1	1
39917340	C	T	T	T	T	T	T	1	1	1	1	1	1	134	87	55	104	96	37	1	1	1	1	1	1	0.991525	1	1	0.993671	1	1
50009957	T	C	C	C	C	C	C	1	1	1	1	1	1	51	67	44	63	34	60	1	1	0.985294	1	1	1	1	1	1	1	1	1
13629078	G	A	A	A	A	A	A	1	1	1	1	1	1	240	197	108	216	153	225	1	1	1	1	1	1	1	1	1	0.985294	1	1
41399055	C	G	G	G	G	G	G	1	1	1	1	1	1	84	79	21	59	39	23	1	1	1	0.985294	1	1	1	1	1	1	1	1
54051306	A	C	C	C	C	C	C	1	1	1	1	1	1	24	24	27	12	22	47	1	1	1	1	1	1	1	1	1	1	1	0.985294
74454084	A	G	G	G	G	G	G	1	1	1	1	1	1	41	31	26	38	63	57	1	1	0.985294	1	1	1	1	1	1	1	1	1
22578513	G	C	C	C	C	C	C	1	1	1	1	1	1	1689	1146	619	1457	958	986	1	1	1	1	1	1	1	1	0.989218	0.996089	1	1
85463139	A	G	G	G	G	G	G	1	1	1	1	1	1	308	291	151	262	138	158	0.994413	1	1	1	1	1	1	0.993569	1	0.997347	1	1
37710485	G	A	A	A	A	A	A	1	1	1	1	1	1	102	118	72	76	55	49	1	1	1	1	1	1	1	1	0.985401	1	1	1
77493130	A	G	G	G	G	G	G	1	1	1	1	1	1	254	237	146	237	118	160	1	1	1	1	1	0.994413	1	0.990991	1	1	1	1
43170118	A	G	G	G	G	G	G	1	1	1	1	1	1	63	195	284	81	31	21	1	1	1	1	1	0.985507	1	1	1	1	1	1
34689682	A	G	G	G	G	G	G	1	1	1	1	1	1	130	259	100	83	66	80	1	0.985507	1	1	1	1	1	1	1	1	1	1
24121152	T	C	C	C	C	C	C	1	1	1	1	1	1	507	571	427	596	248	297	1	1	1	1	1	1	1	0.994624	1	1	0.997561	0.993333
4753236	A	G	G	G	G	G	G	1	1	1	1	1	1	162	91	87	140	58	91	0.990385	1	1	1	1	1	0.995238	1	1	1	1	1
85463156	T	C	C	C	C	C	C	1	1	1	1	1	1	164	156	54	127	85	97	0.993902	1	1	1	1	1	1	1	1	0.991736	1	1
2568567	C	T	T	T	T	T	T	1	1	1	1	1	1	609	430	286	498	389	629	1	1	0.997596	1	1	1	1	1	1	0.994253	1	0.993808
74684808	T	C	C	C	C	C	C	1	1	1	1	1	1	210	204	235	278	86	340	0.998663	1	0.995272	0.995333	1	1	1	0.996441	1	1	1	1
[truncated: 2,369 more rows]
